# Supplementary material for: Detecting Differentially Variable MicroRNAs via Model-Based Clustering
Source: Hindawi journal article supplement (doi:10.1155/2018/6591634), 2018-07-12

**hsa-let-7d-star**  
**(GSE67138)**

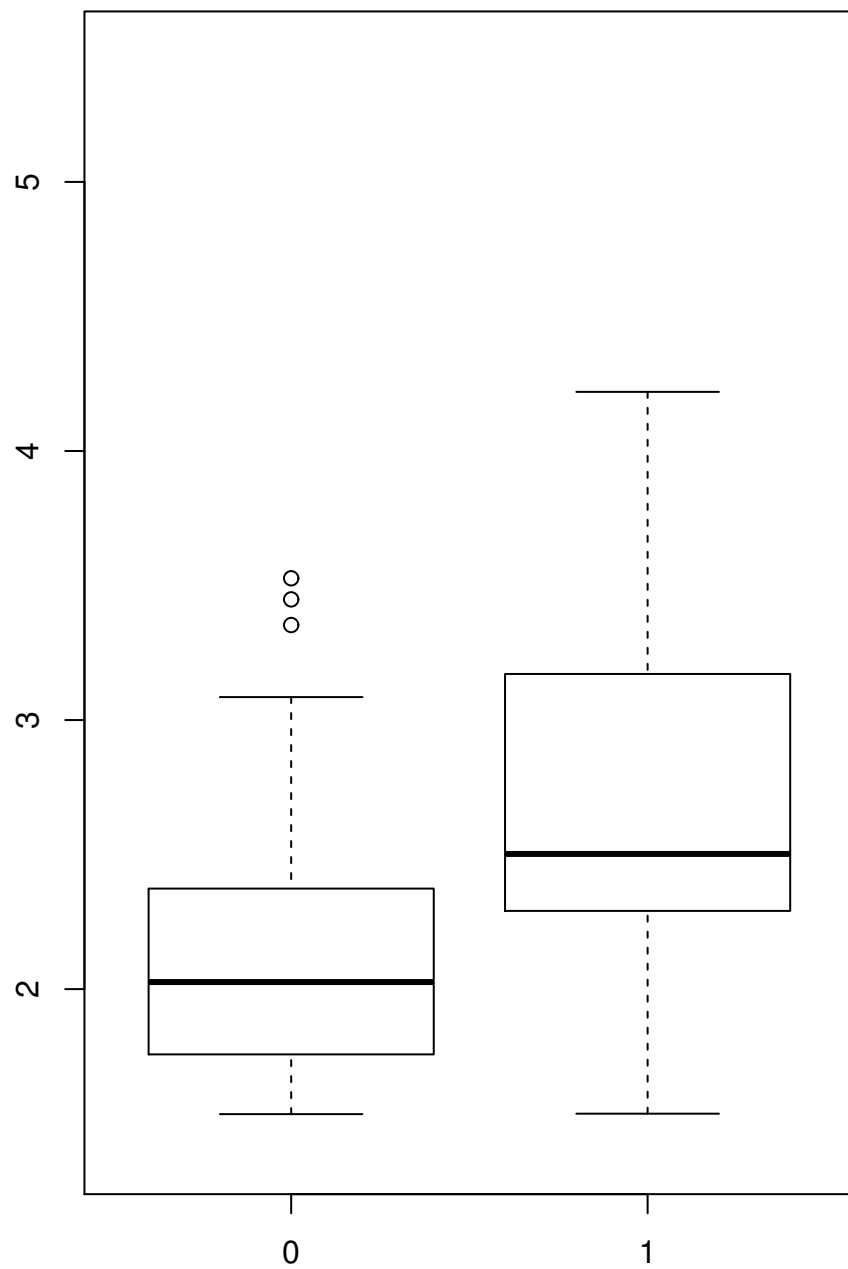

**hsa-let-7d-star**  
**(GSE67139)**

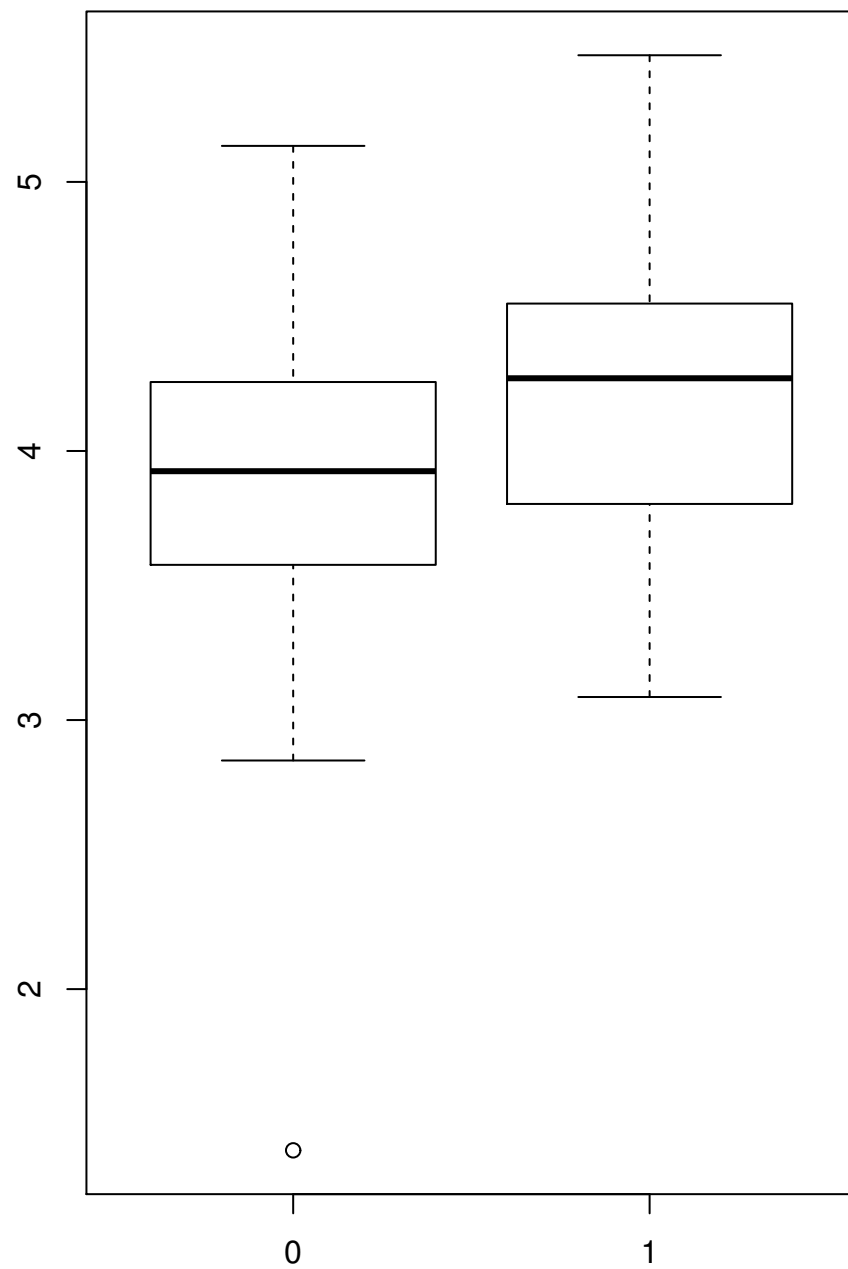

**hsa-let-7e**  
**(GSE67138)**

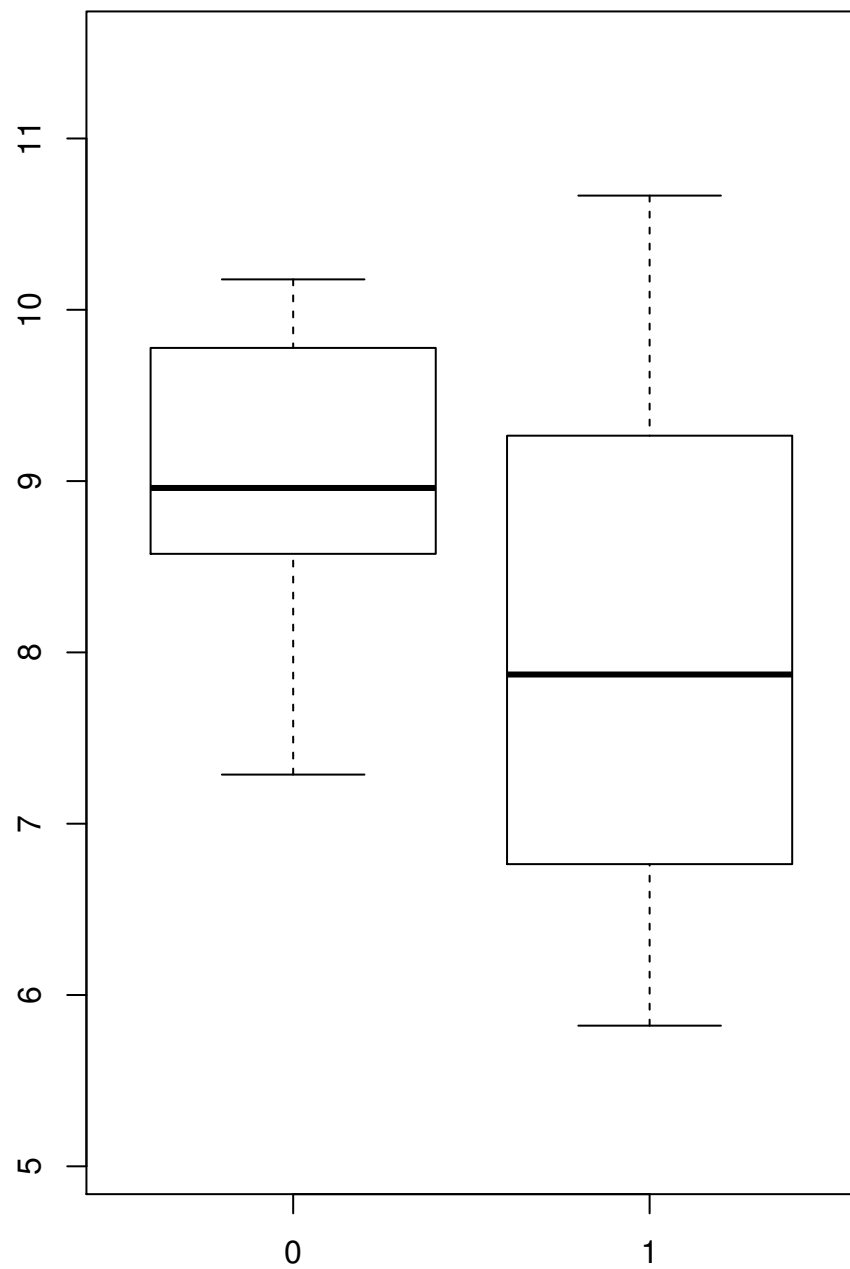

**hsa-let-7e**  
**(GSE67139)**

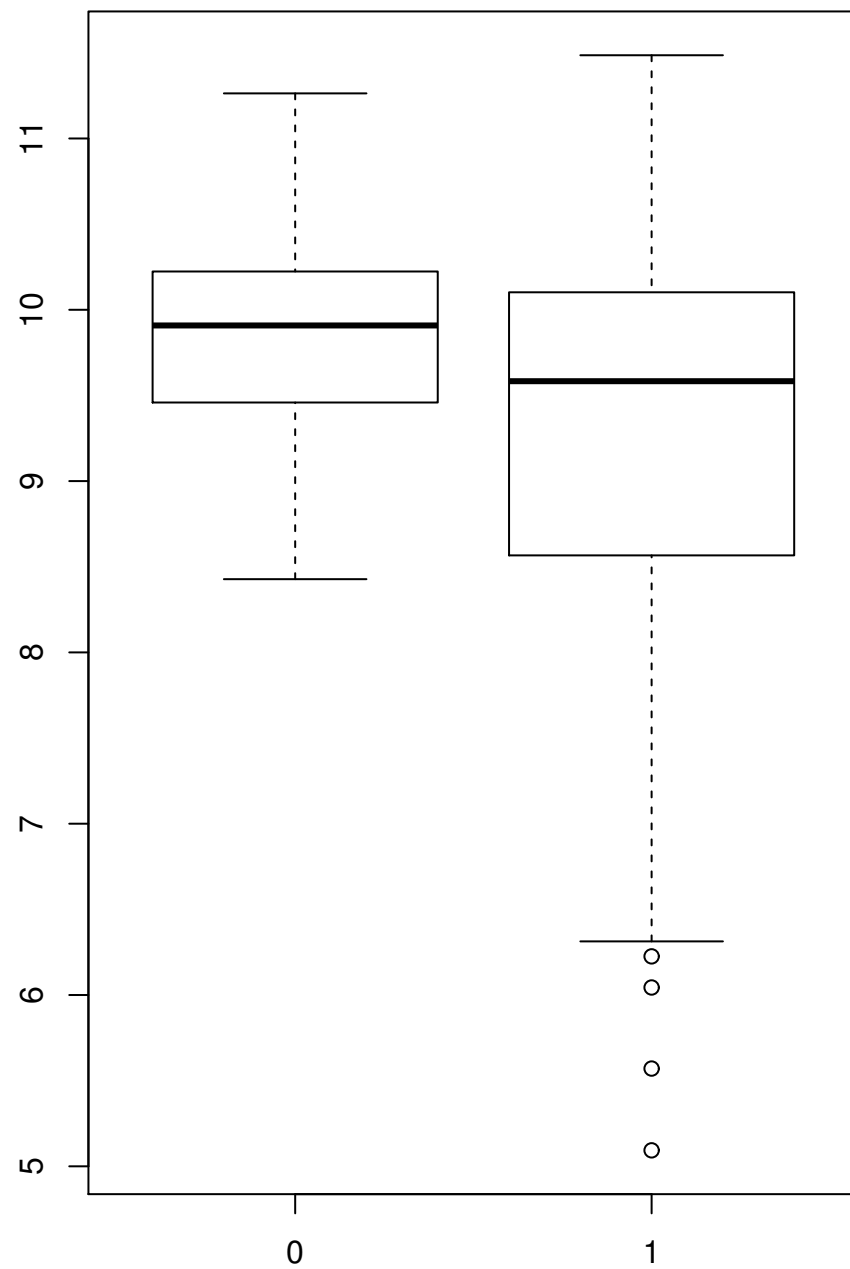

**hsa-let-7f-1-star**  
**(GSE67138)**

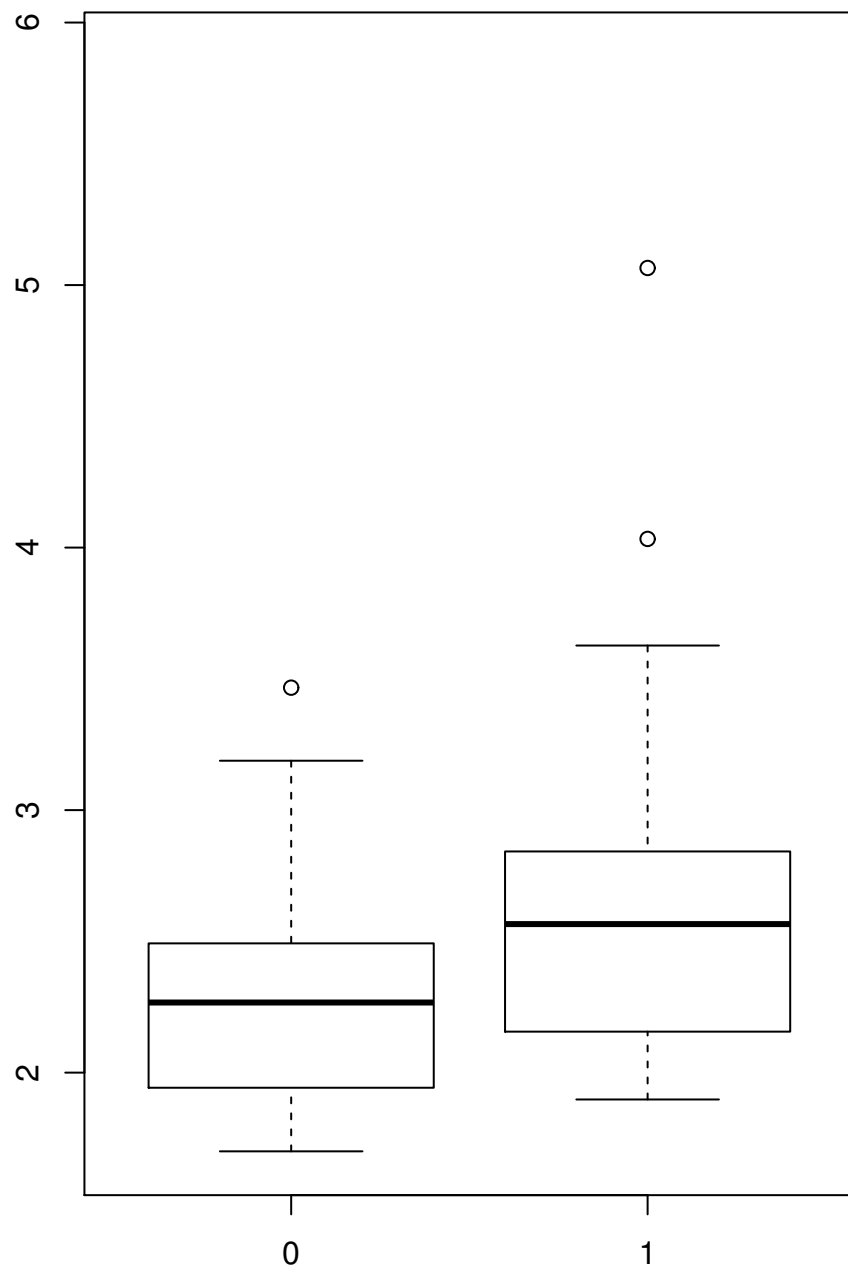

**hsa-let-7f-1-star**  
**(GSE67139)**

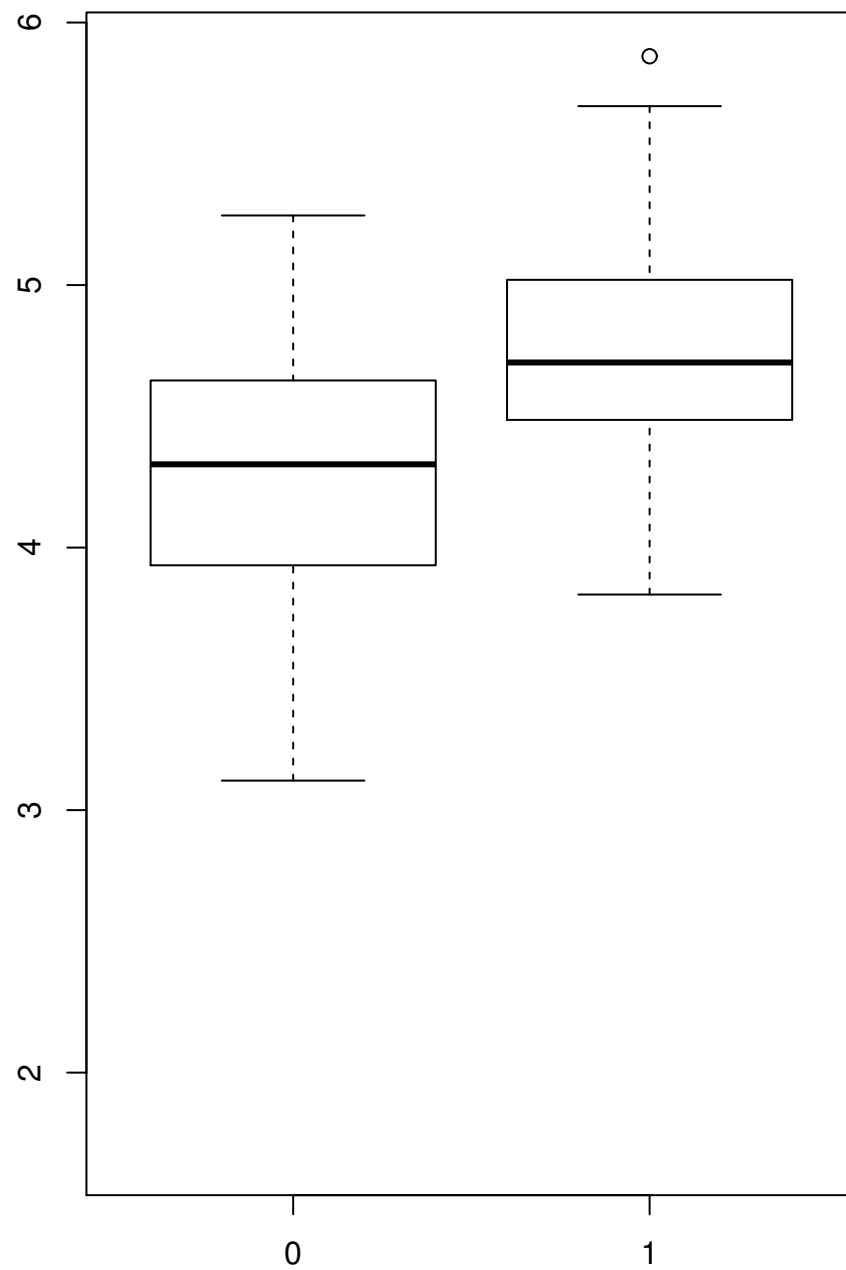

**hsa-miR-10a**  
**(GSE67138)**

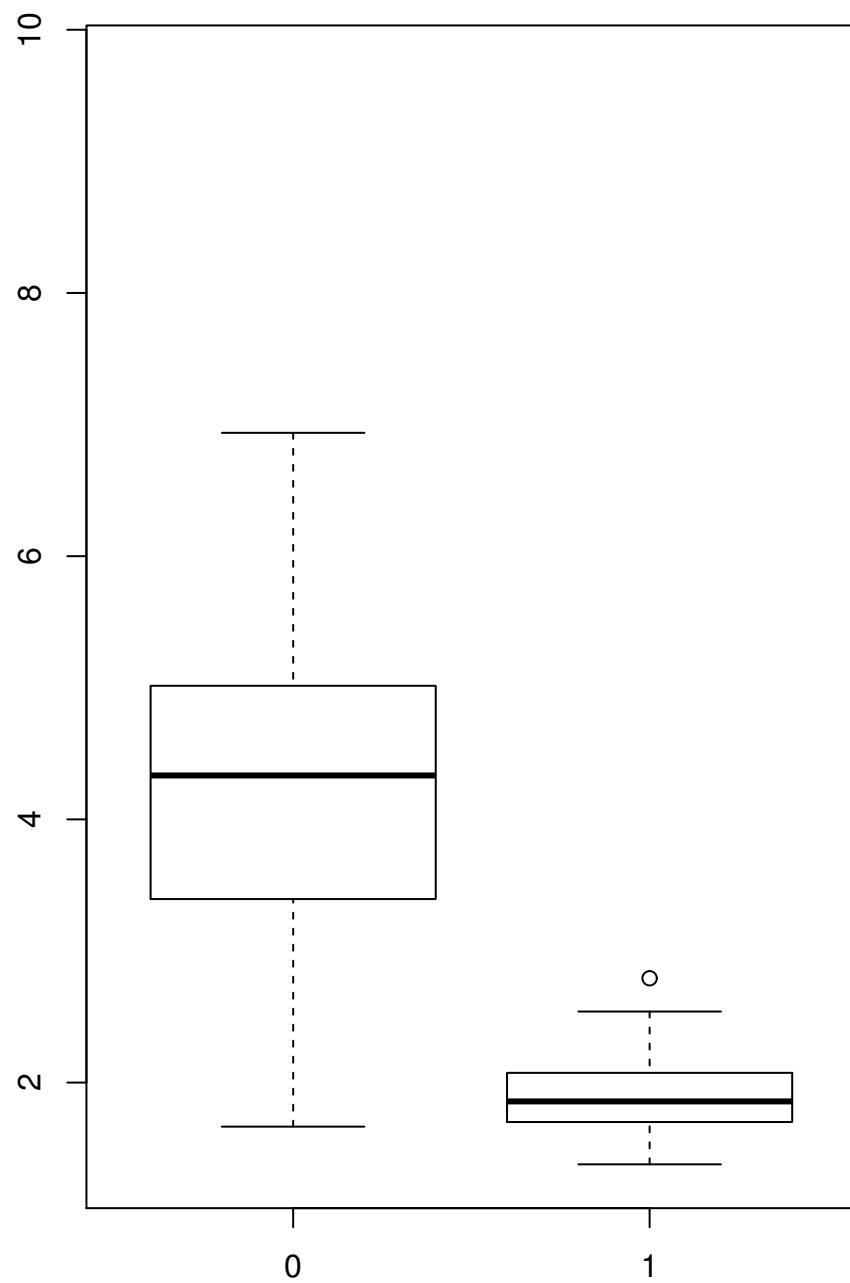

**hsa-miR-10a**  
**(GSE67139)**

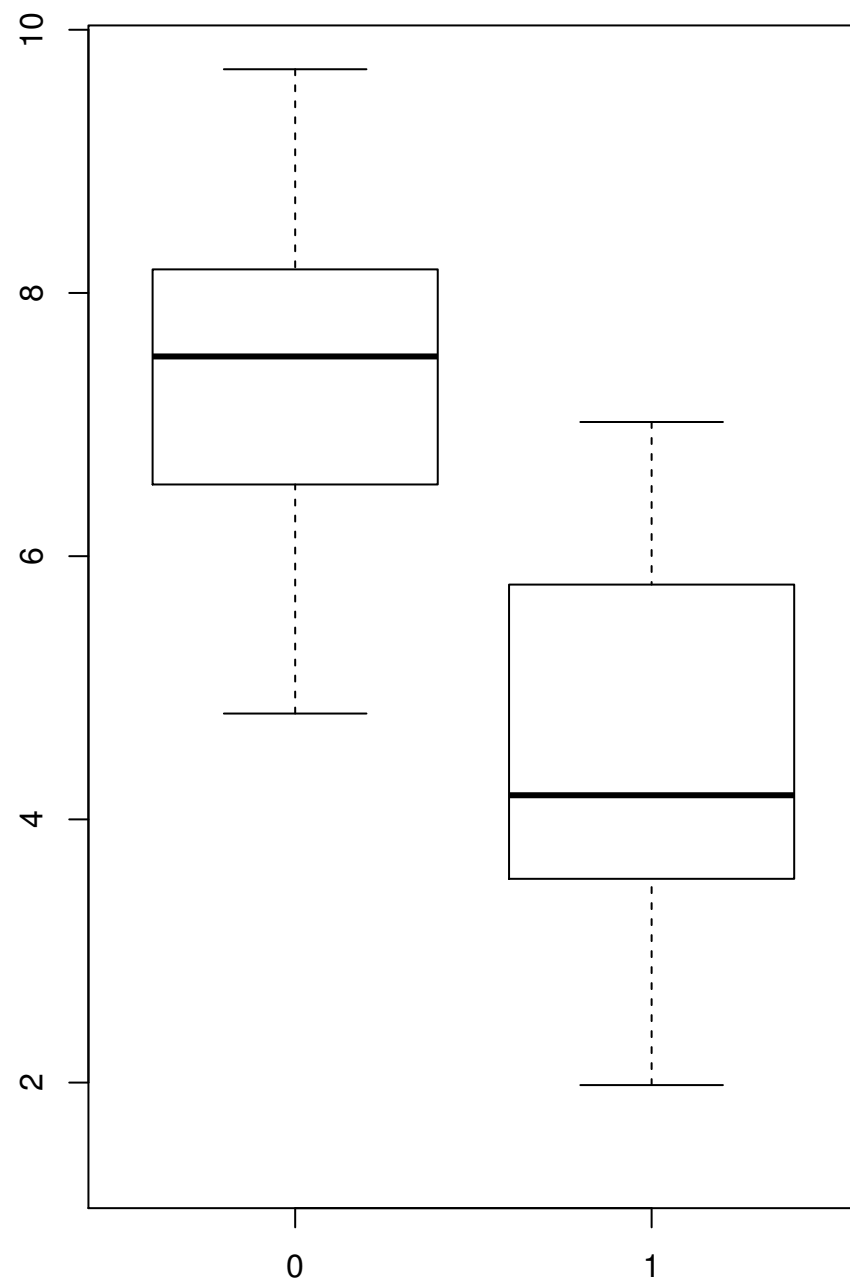

**hsa-miR-10b  
(GSE67138)**

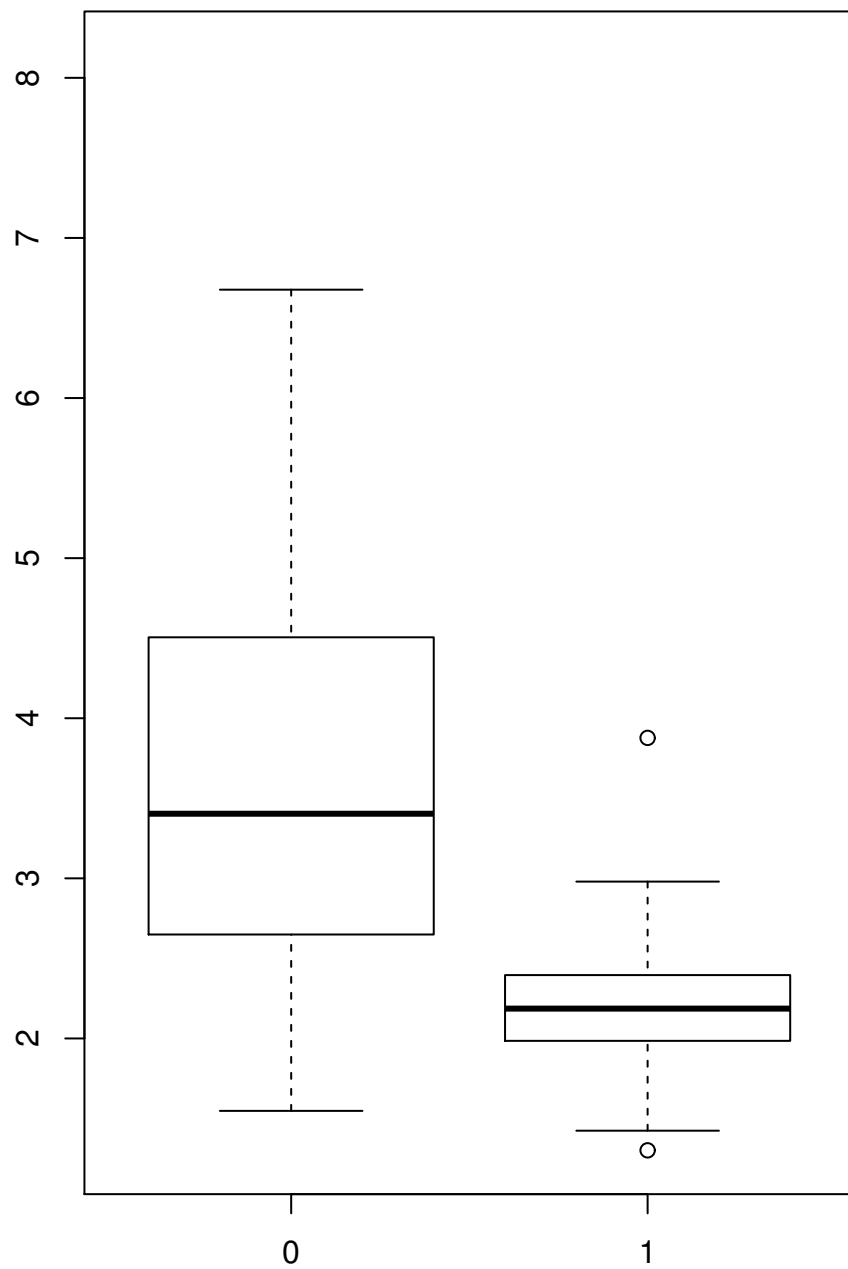

**hsa-miR-10b  
(GSE67139)**

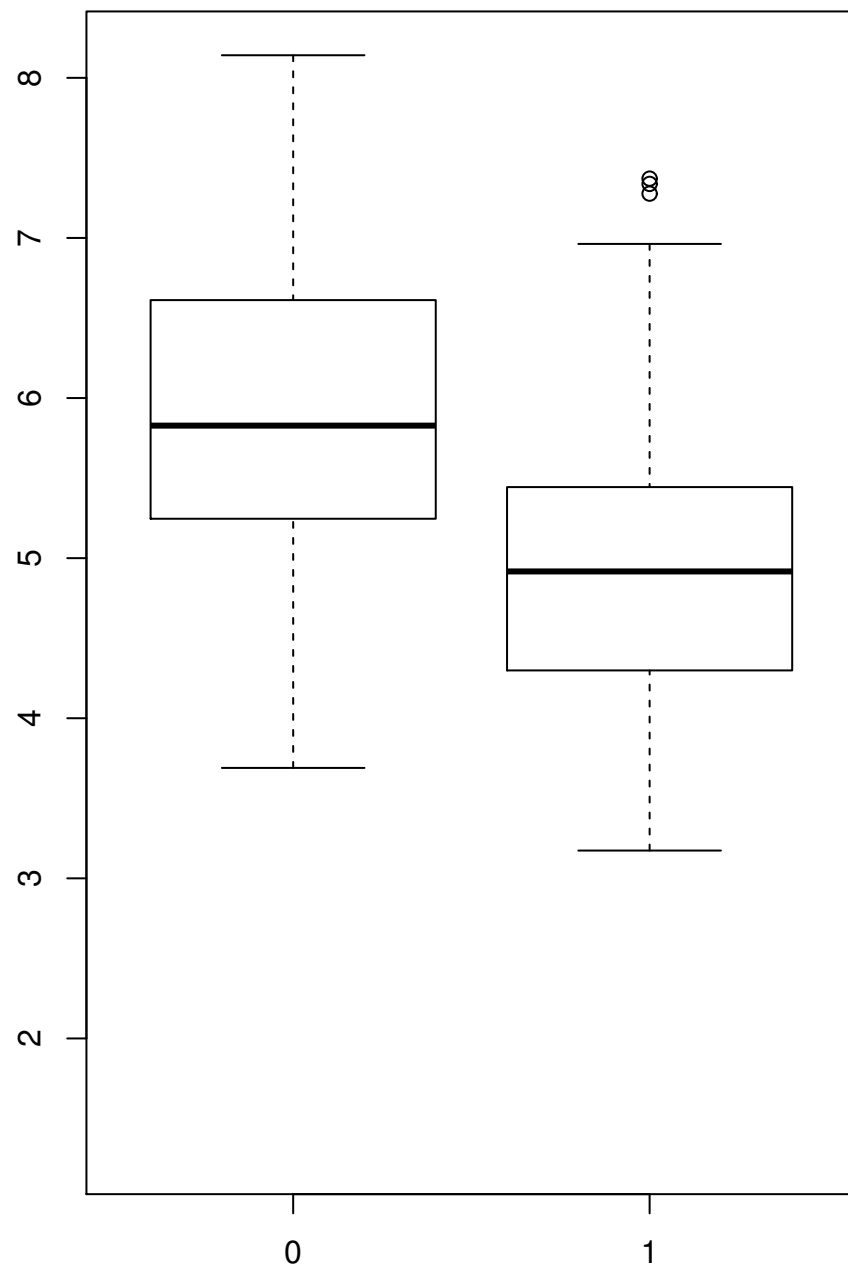

**hsa-miR-1180  
(GSE67138)**

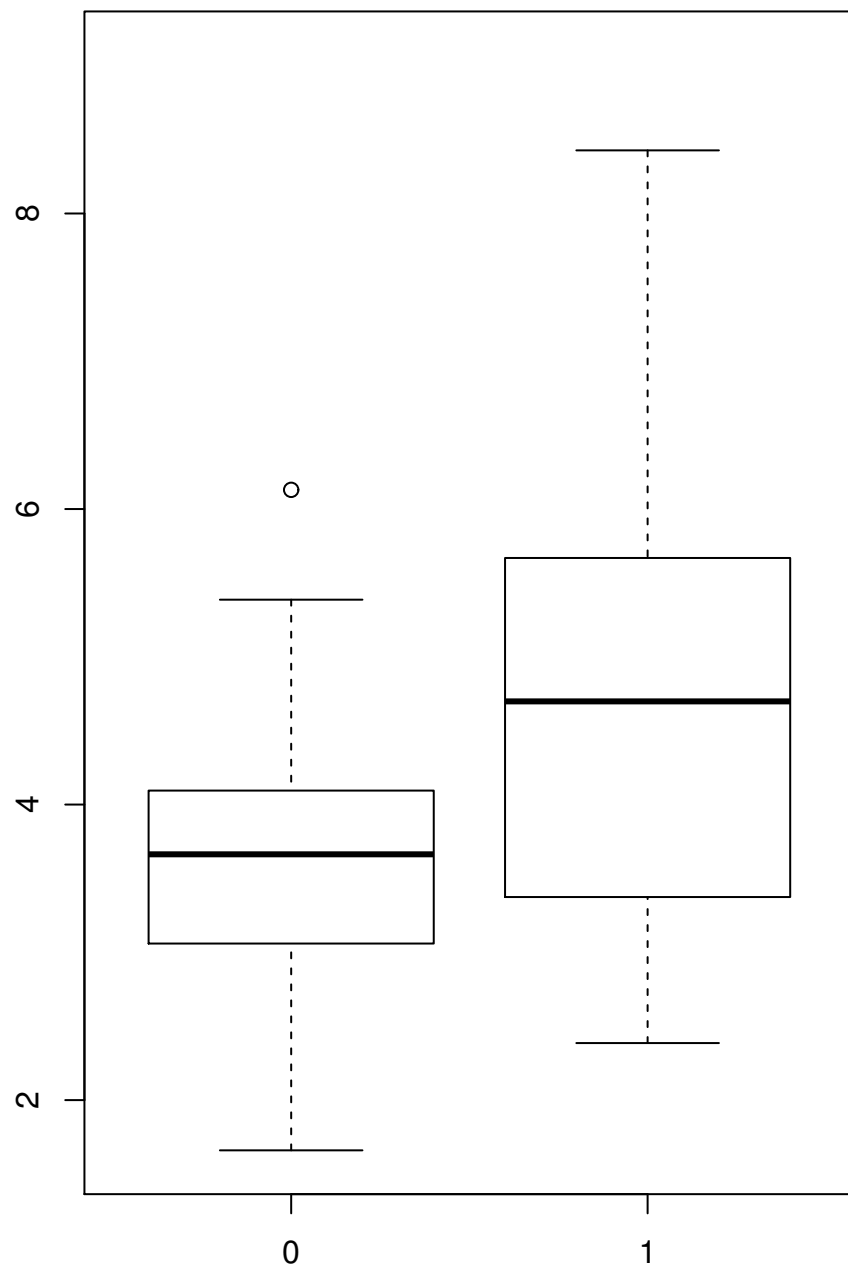

**hsa-miR-1180  
(GSE67139)**

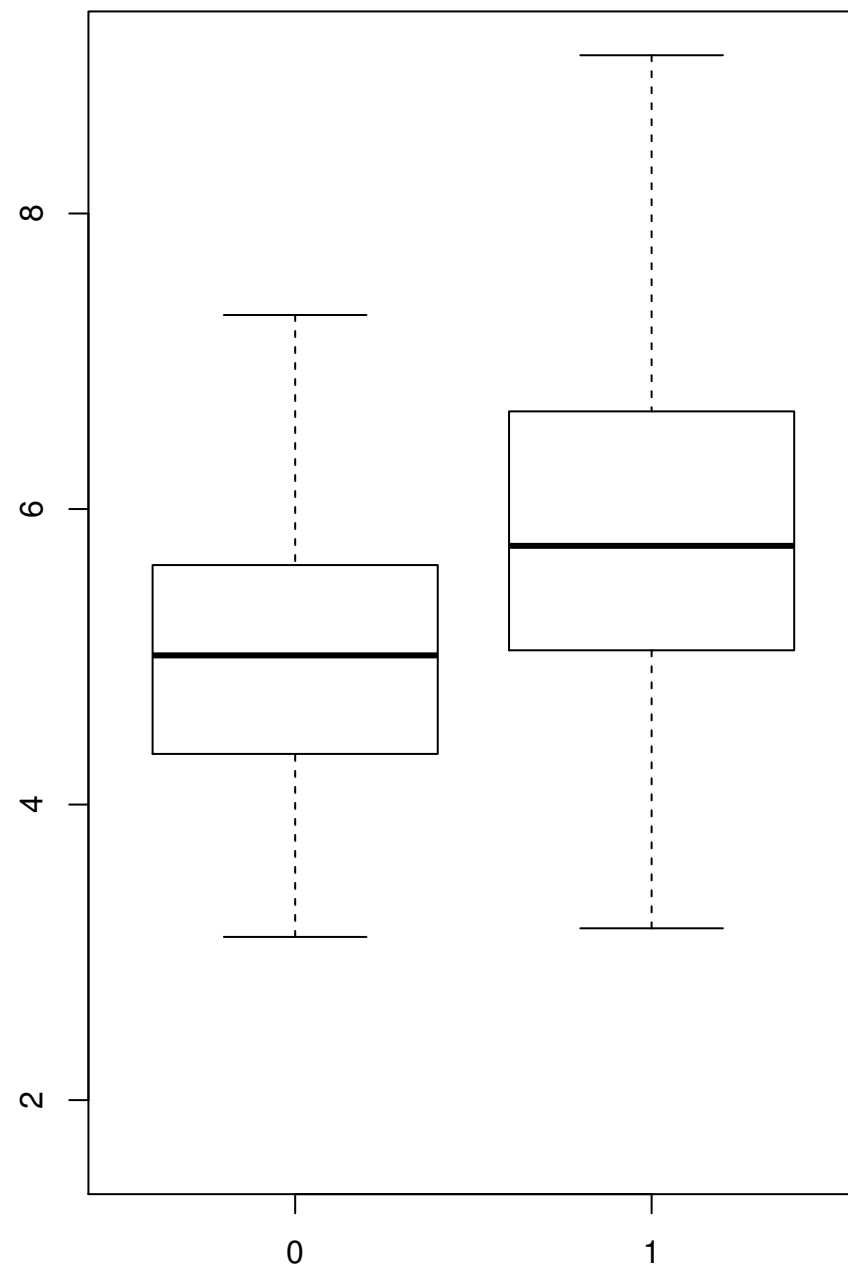

**hsa-miR-1183  
(GSE67138)**

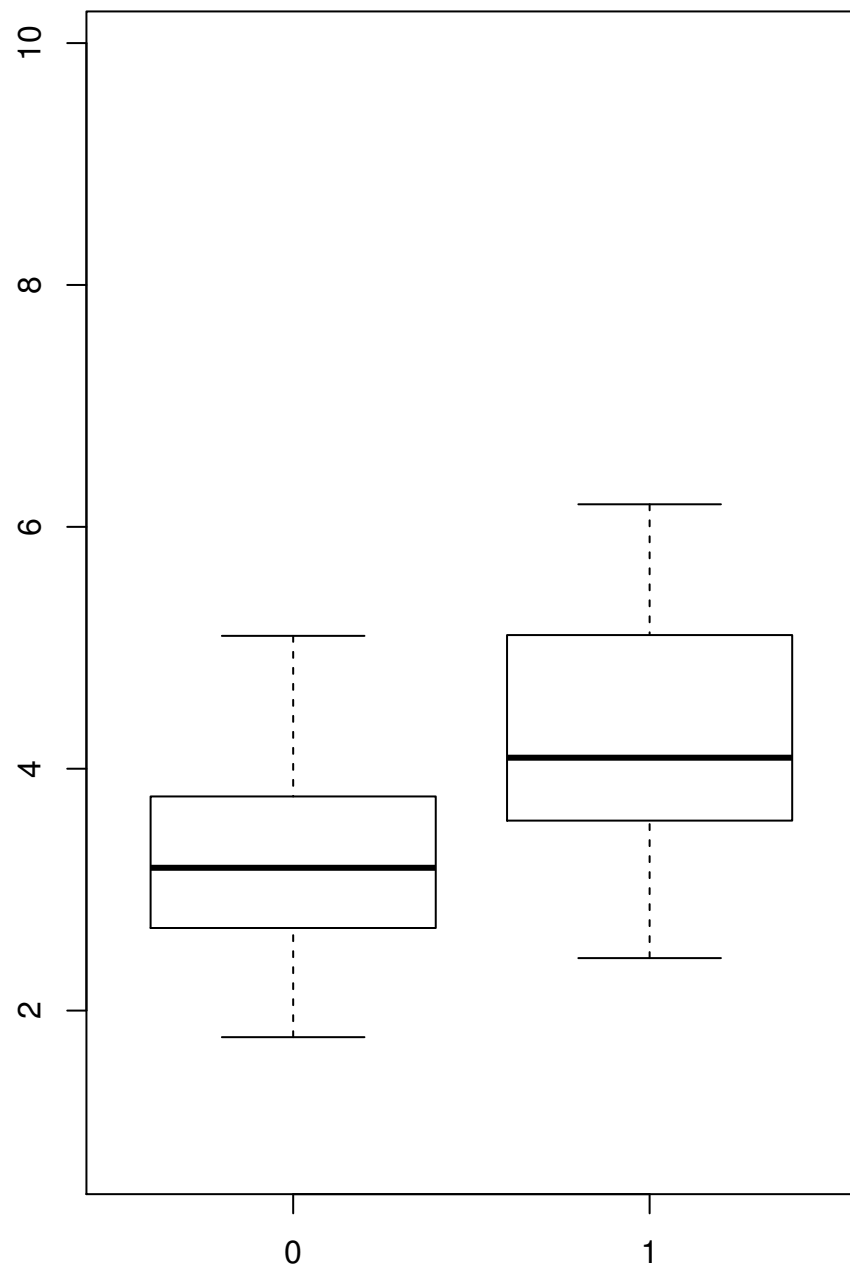

**hsa-miR-1183  
(GSE67139)**

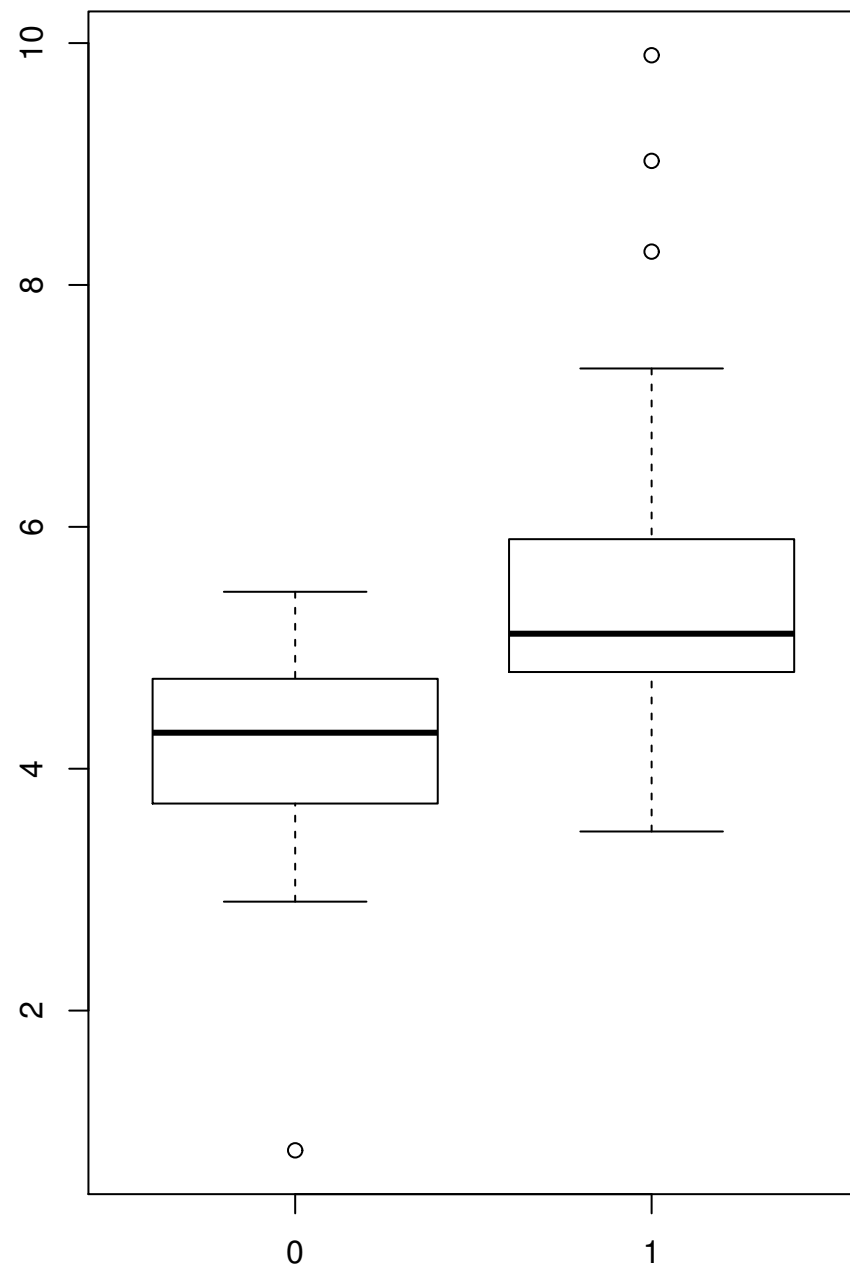

**hsa-miR-1201  
(GSE67138)**

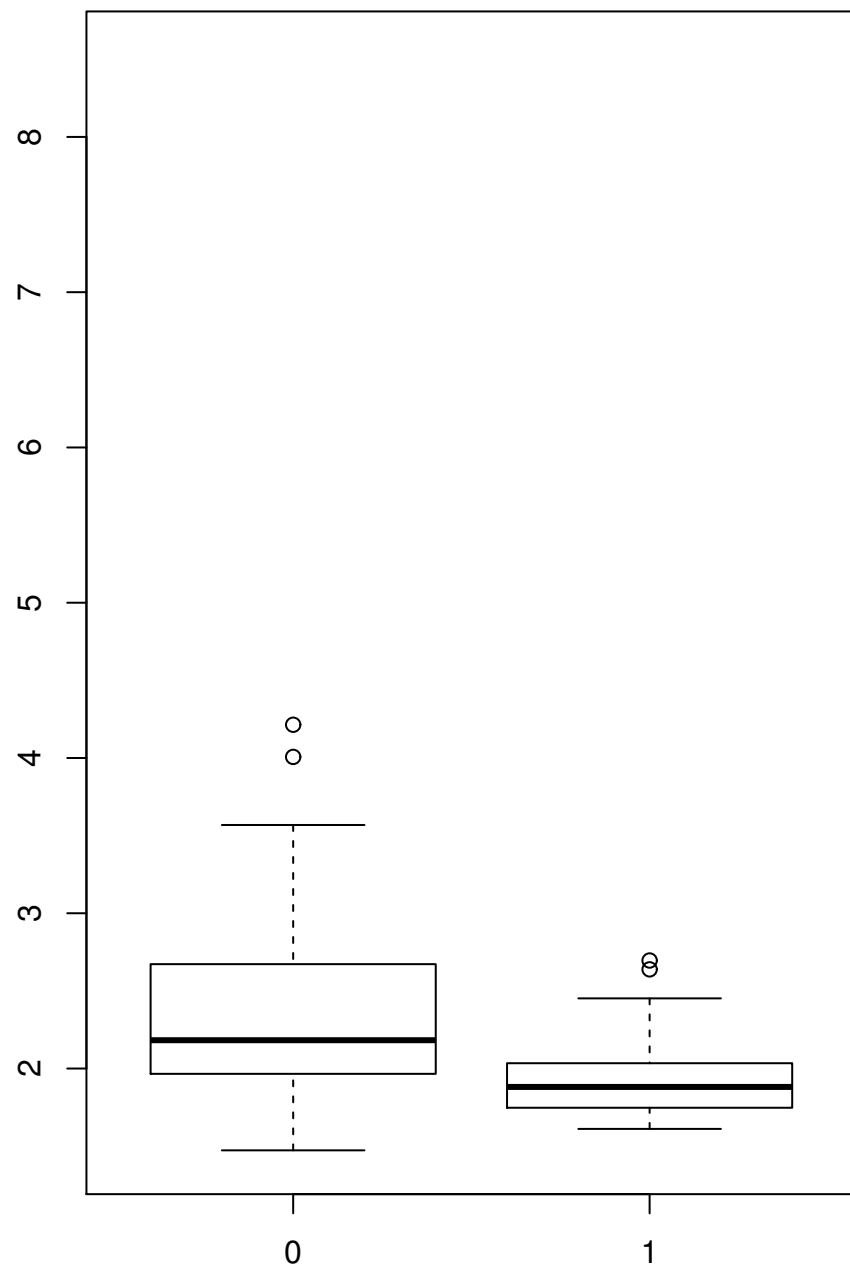

**hsa-miR-1201  
(GSE67139)**

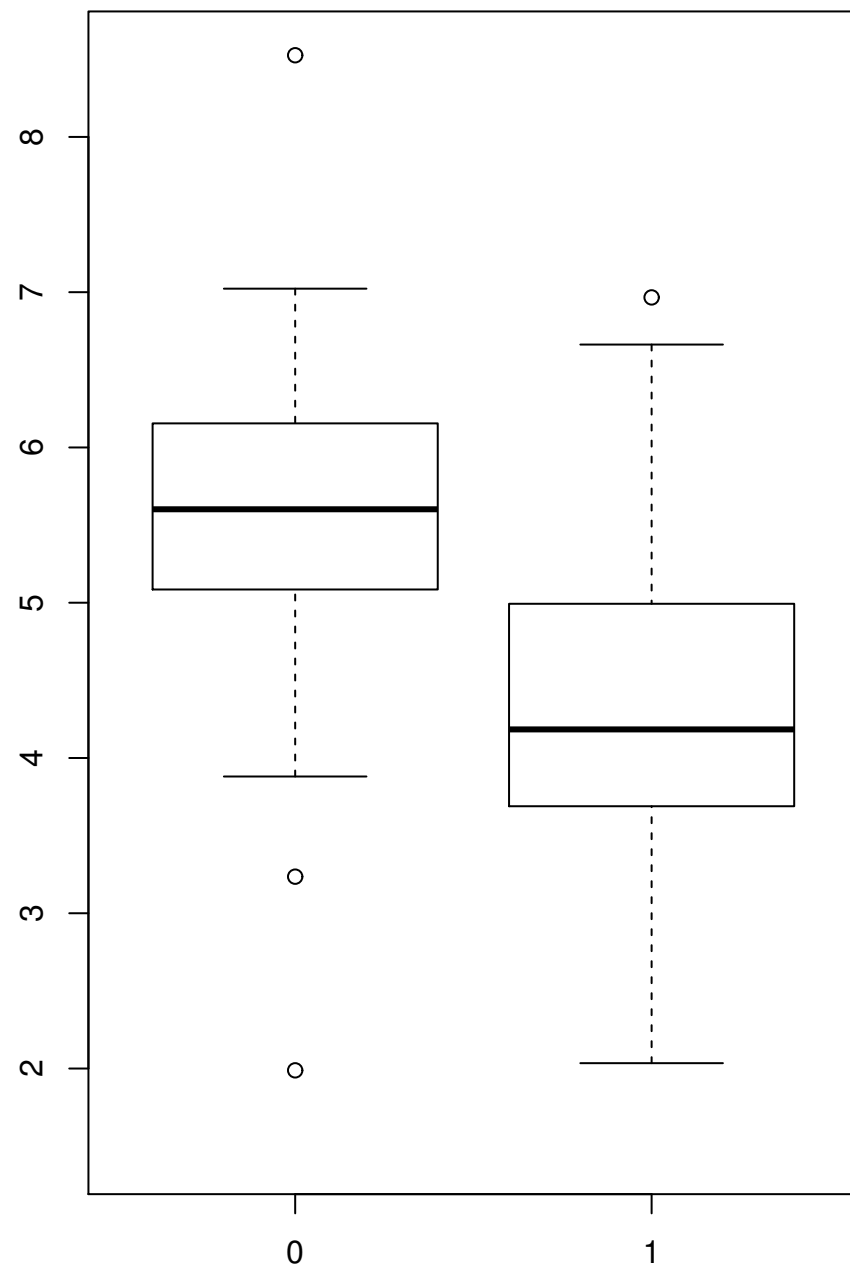



**hsa-miR-1207-5p  
(GSE67138)**

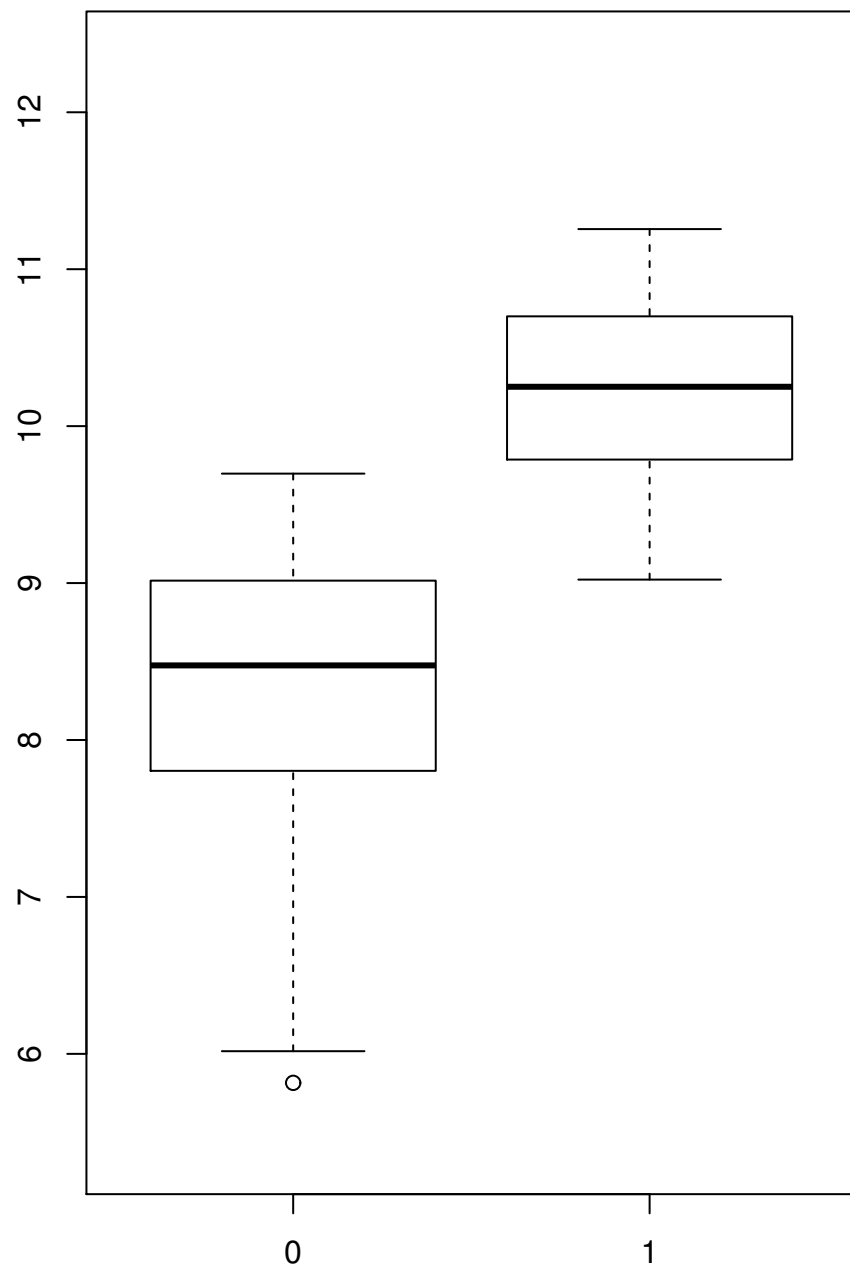

**hsa-miR-1207-5p  
(GSE67139)**

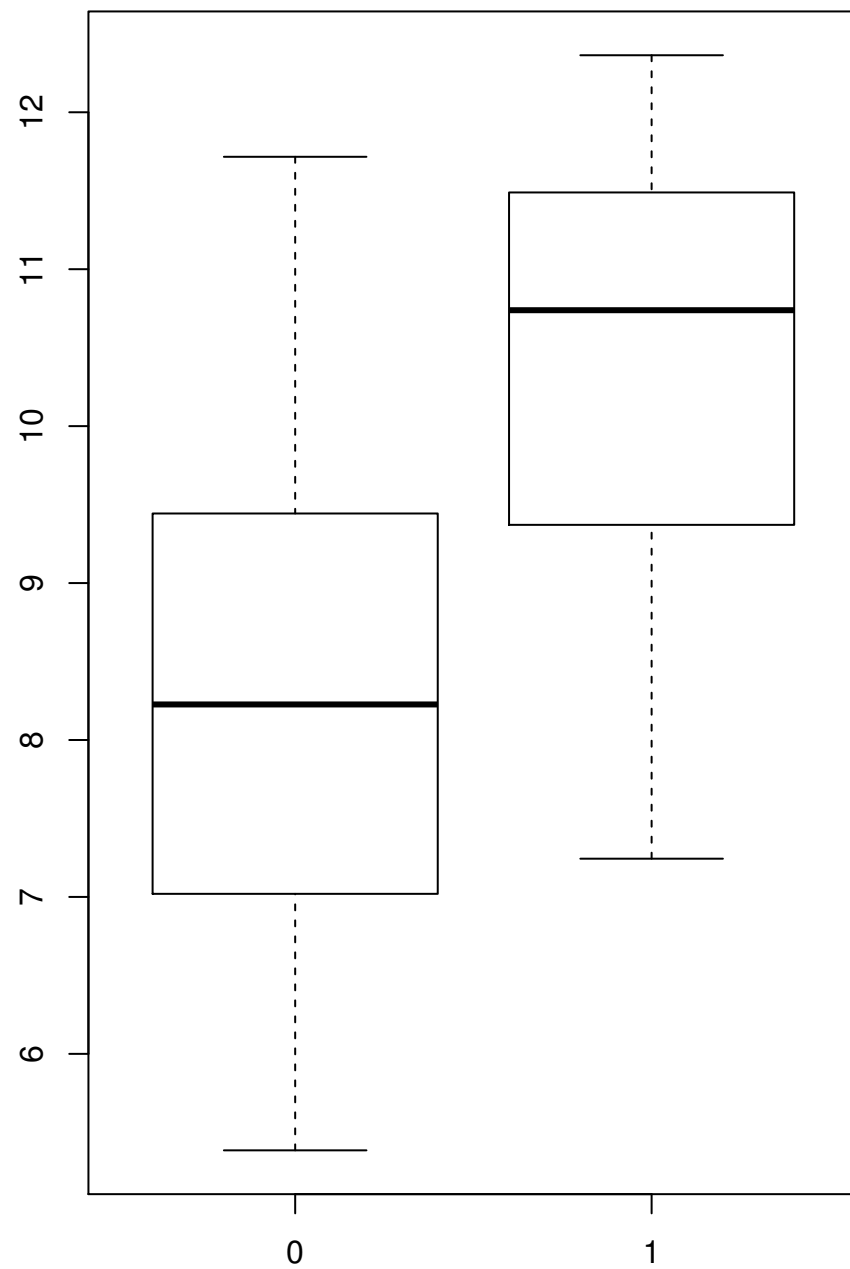

**hsa-miR-1249**  
**(GSE67138)**

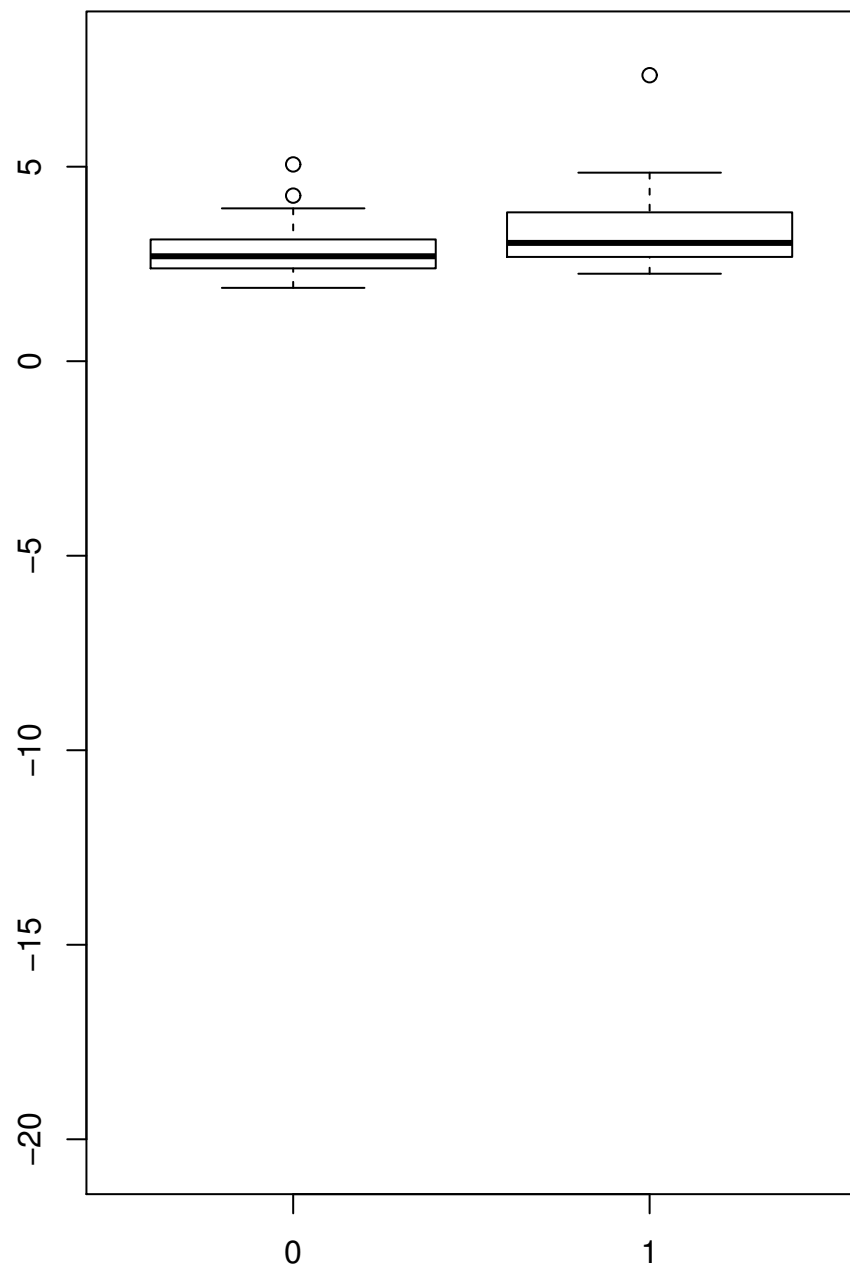

**hsa-miR-1249**  
**(GSE67139)**

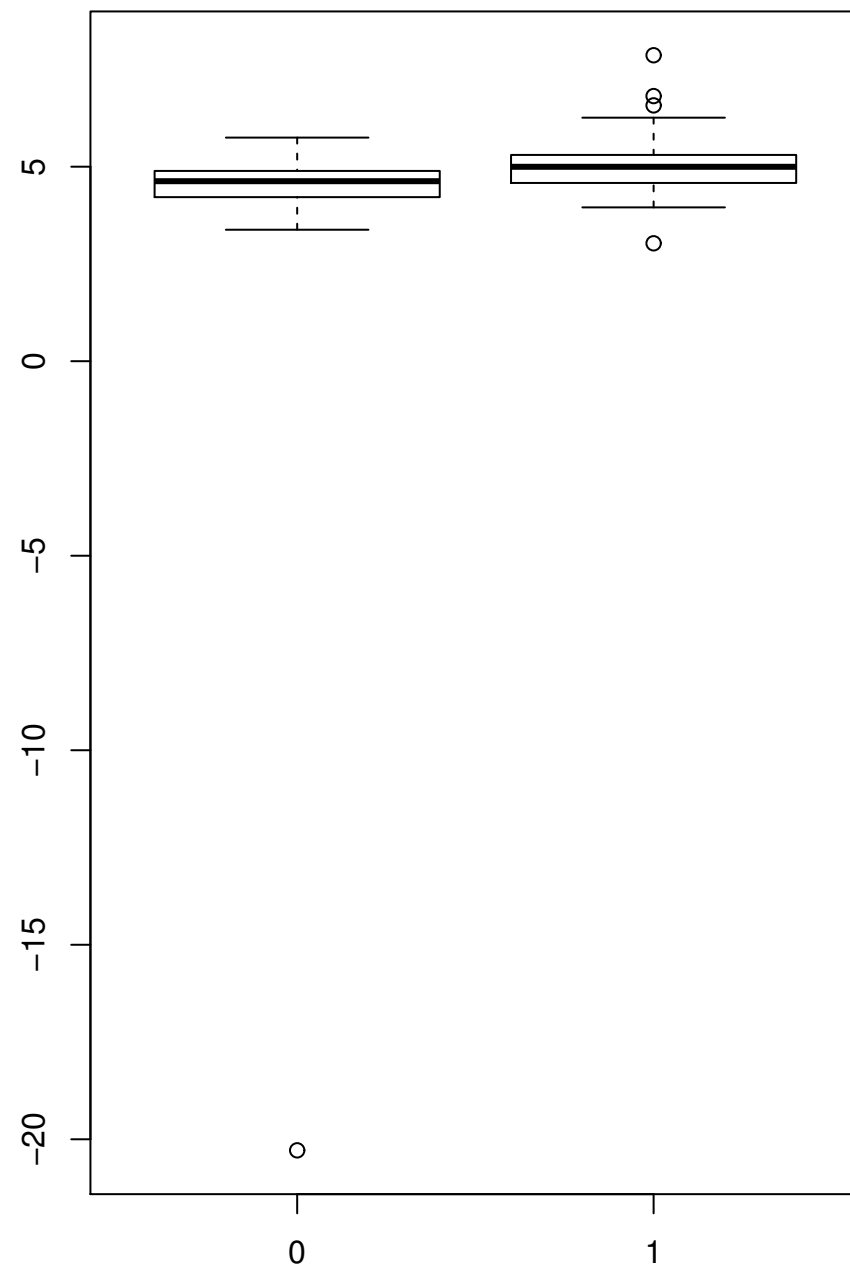

**hsa-miR-125a-5p  
(GSE67138)**

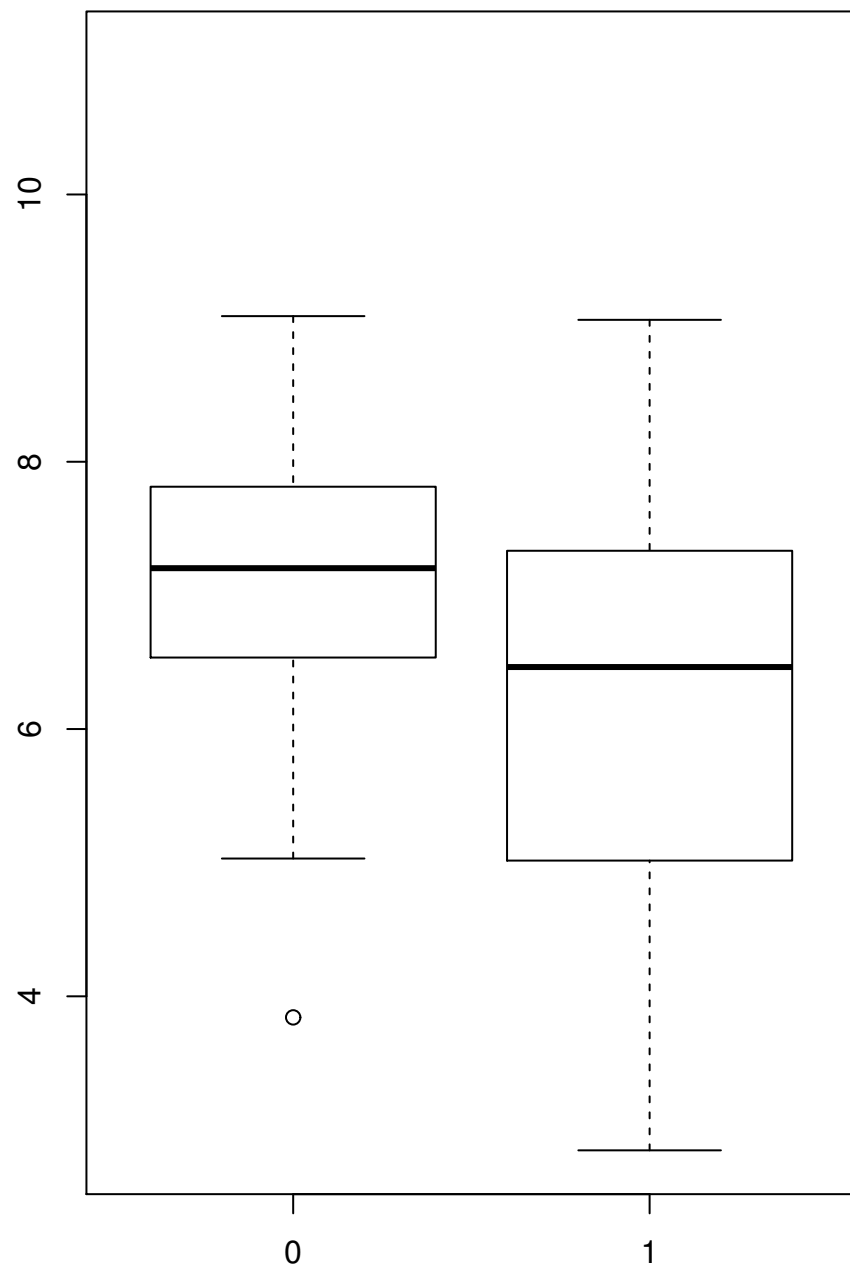

**hsa-miR-125a-5p  
(GSE67139)**

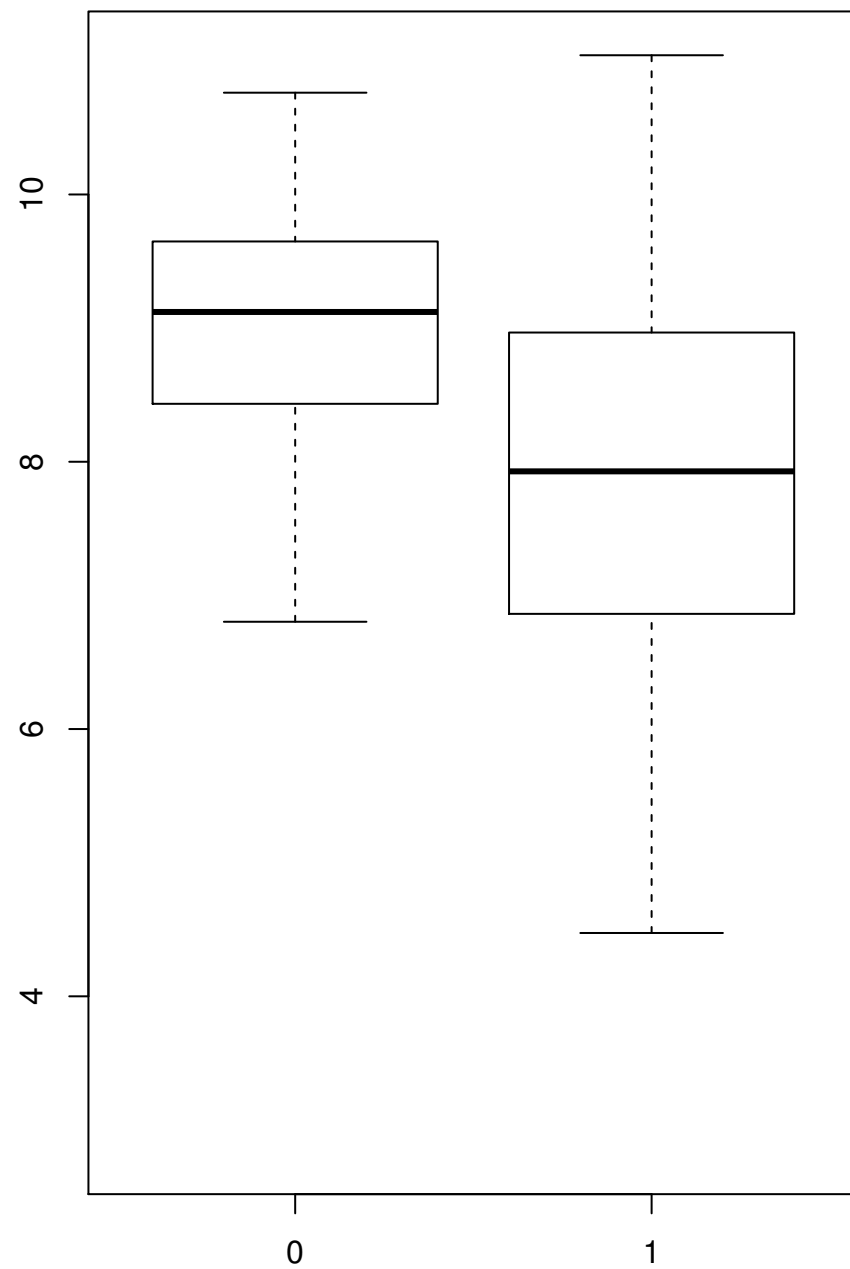

**hsa-miR-125b-2-star  
(GSE67138)**

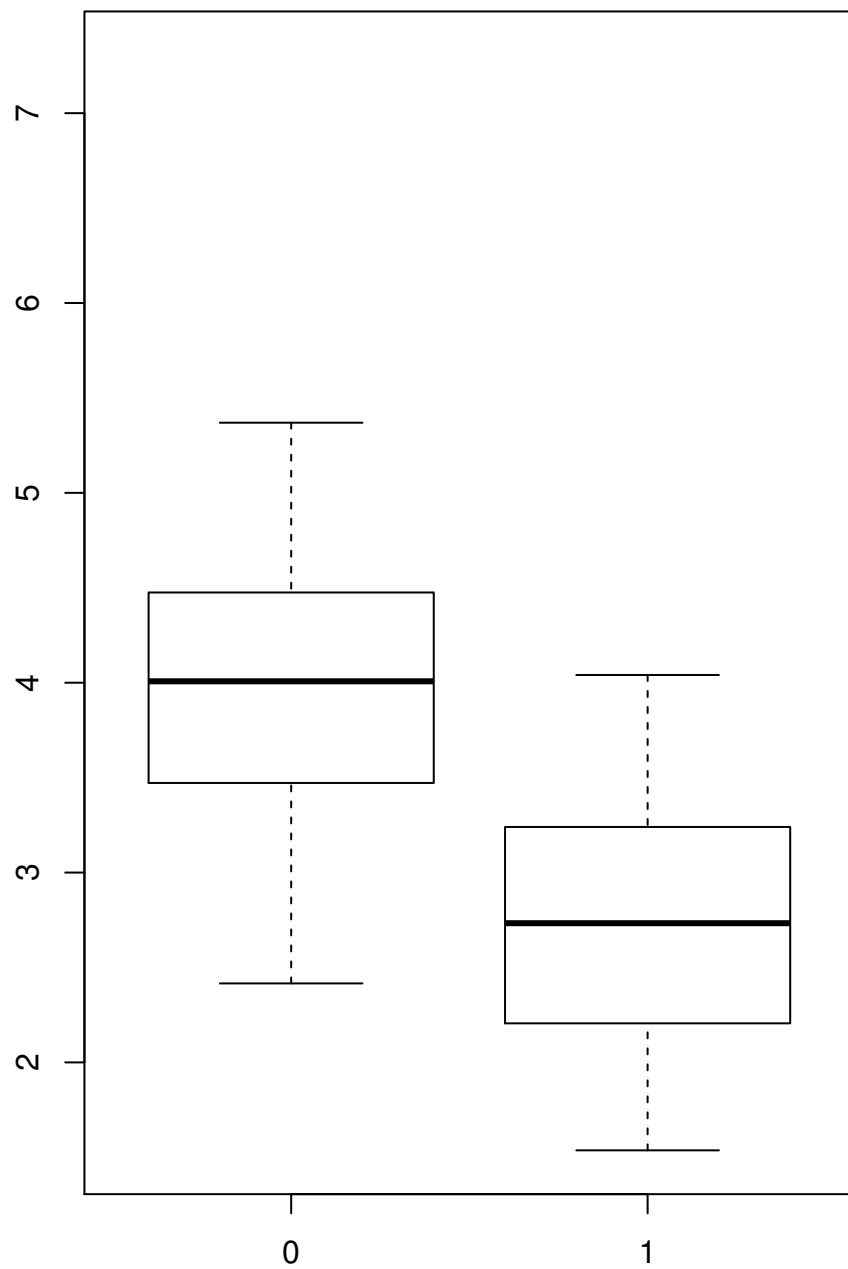

**hsa-miR-125b-2-star  
(GSE67139)**

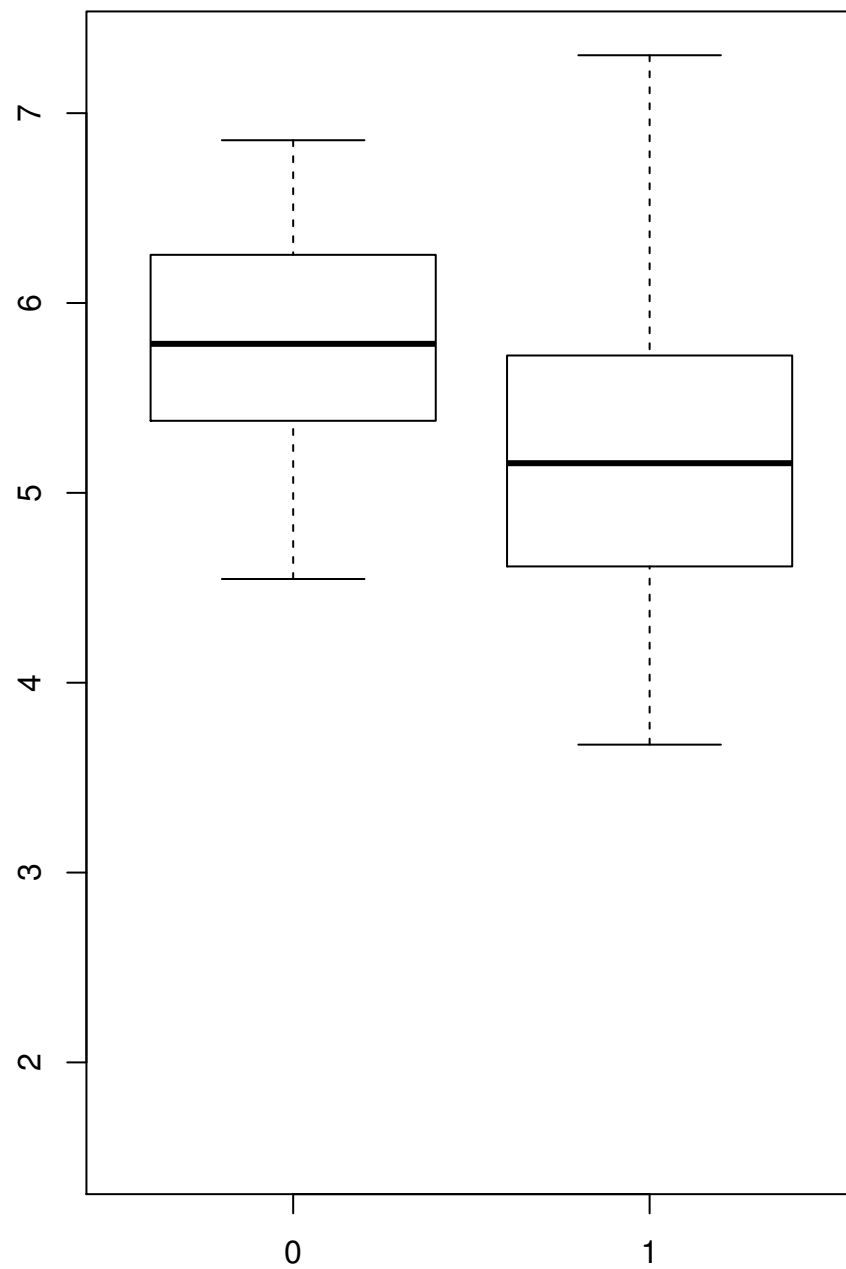

**hsa-miR-1268  
(GSE67138)**

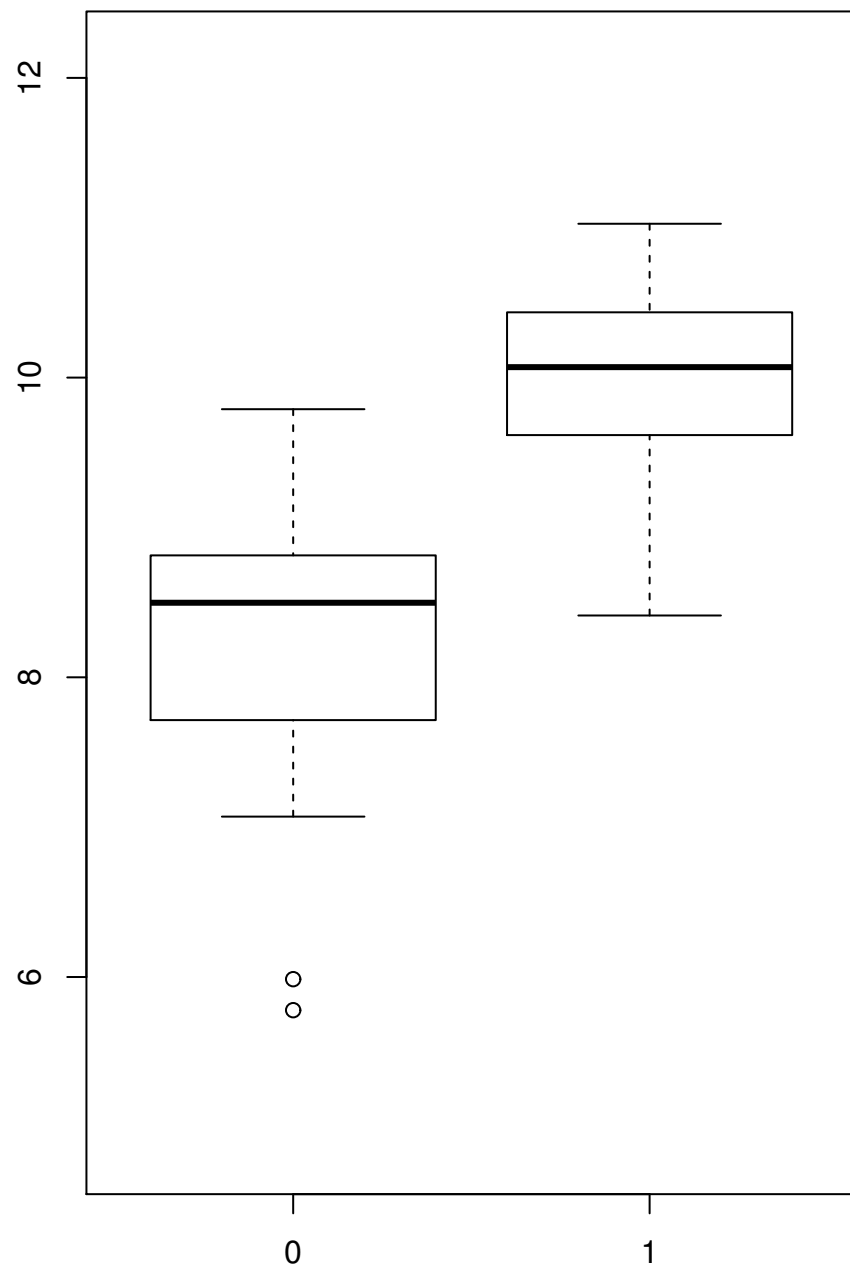

**hsa-miR-1268  
(GSE67139)**

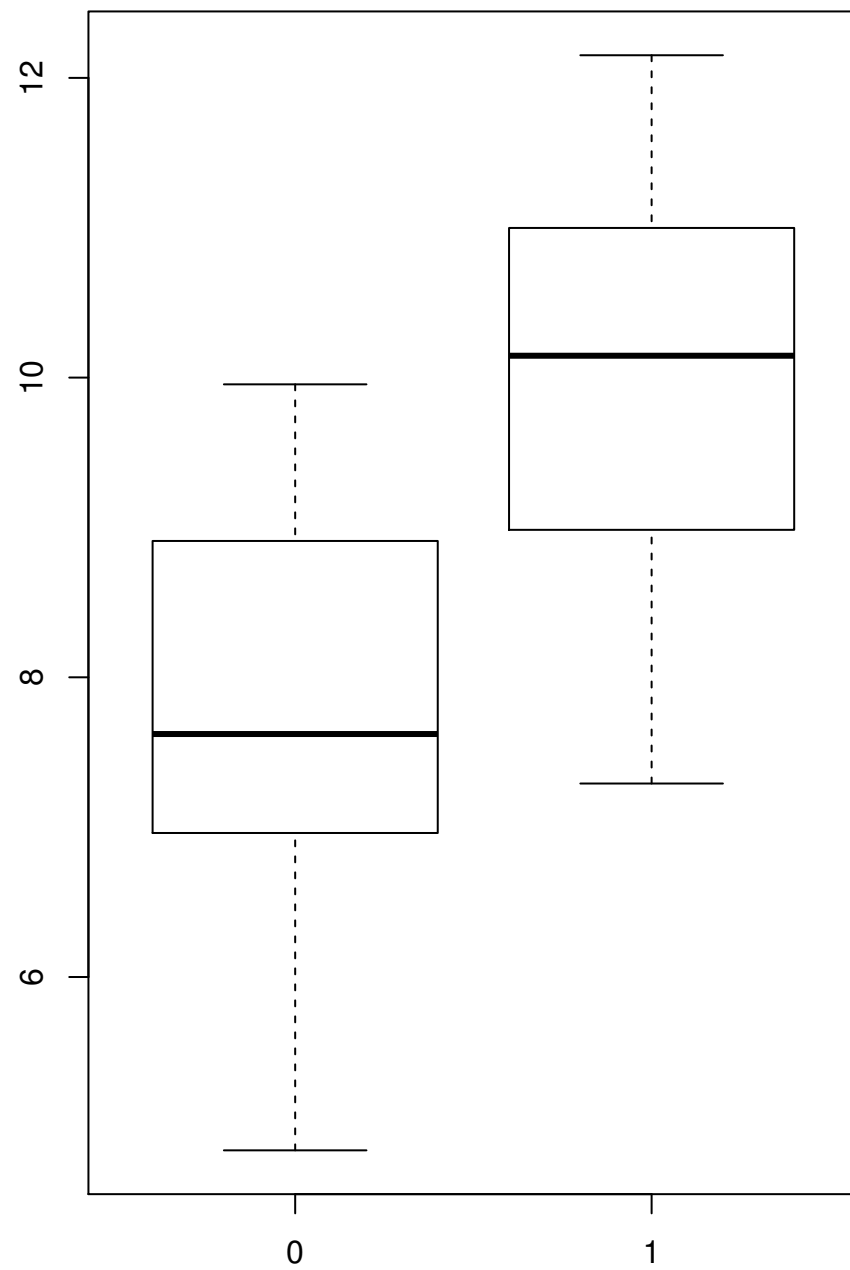

**hsa-miR-1279**  
**(GSE67138)**

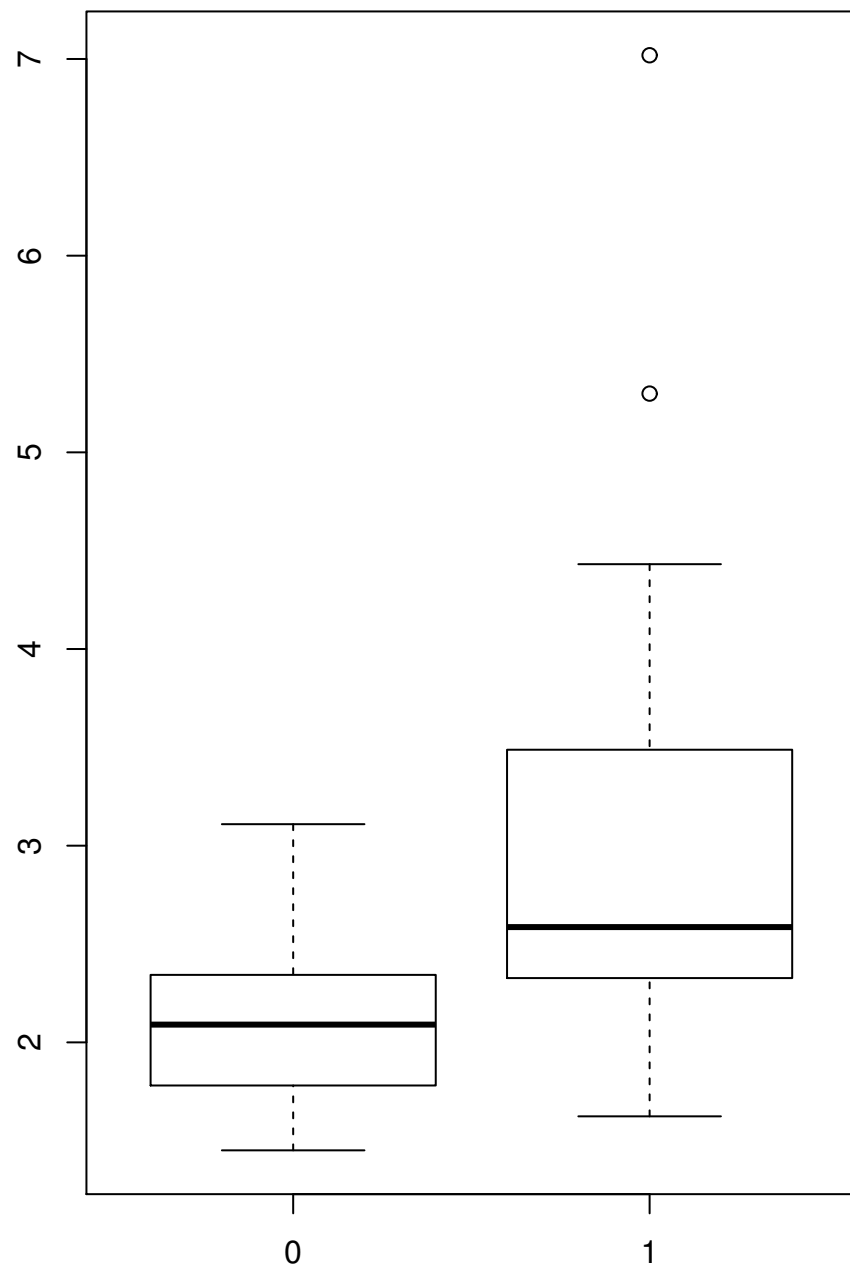

**hsa-miR-1279**  
**(GSE67139)**

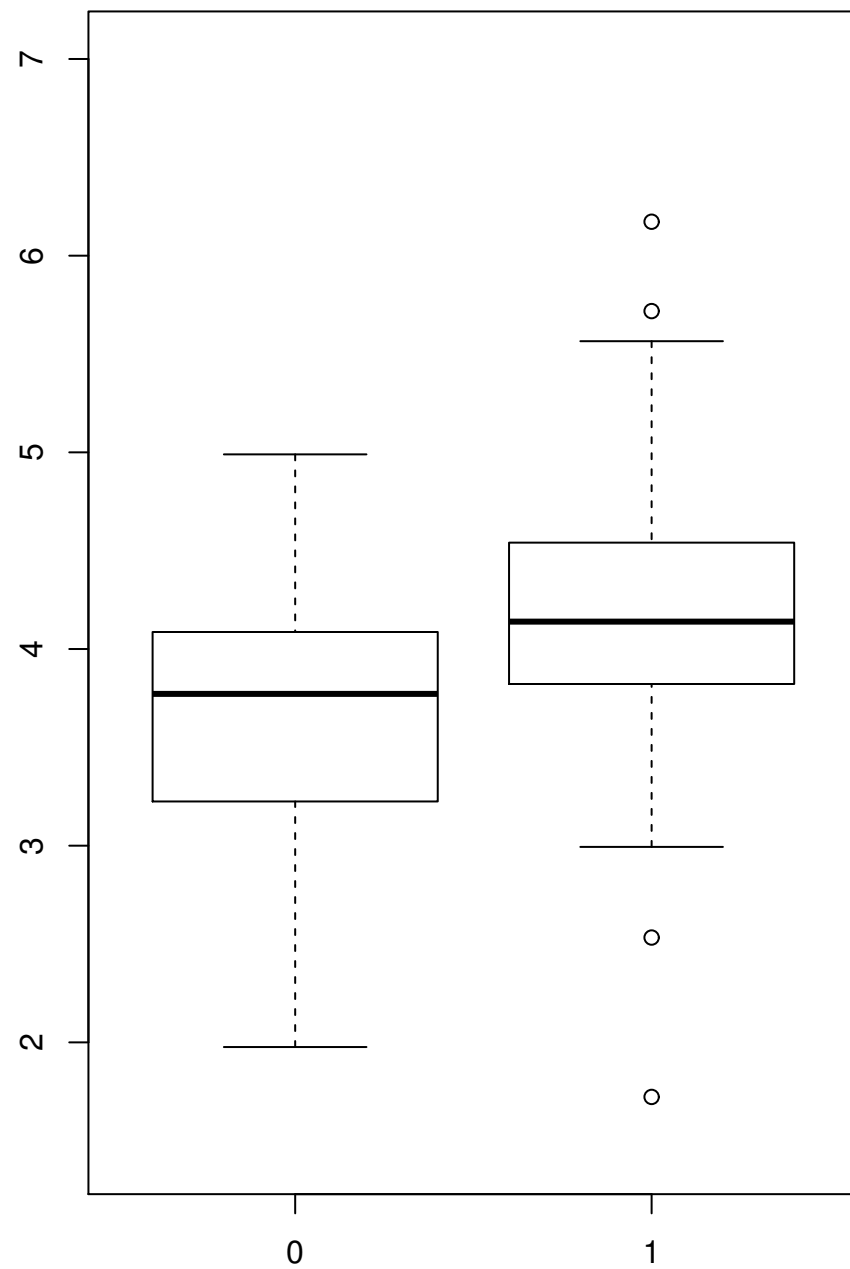

**hsa-miR-128  
(GSE67138)**

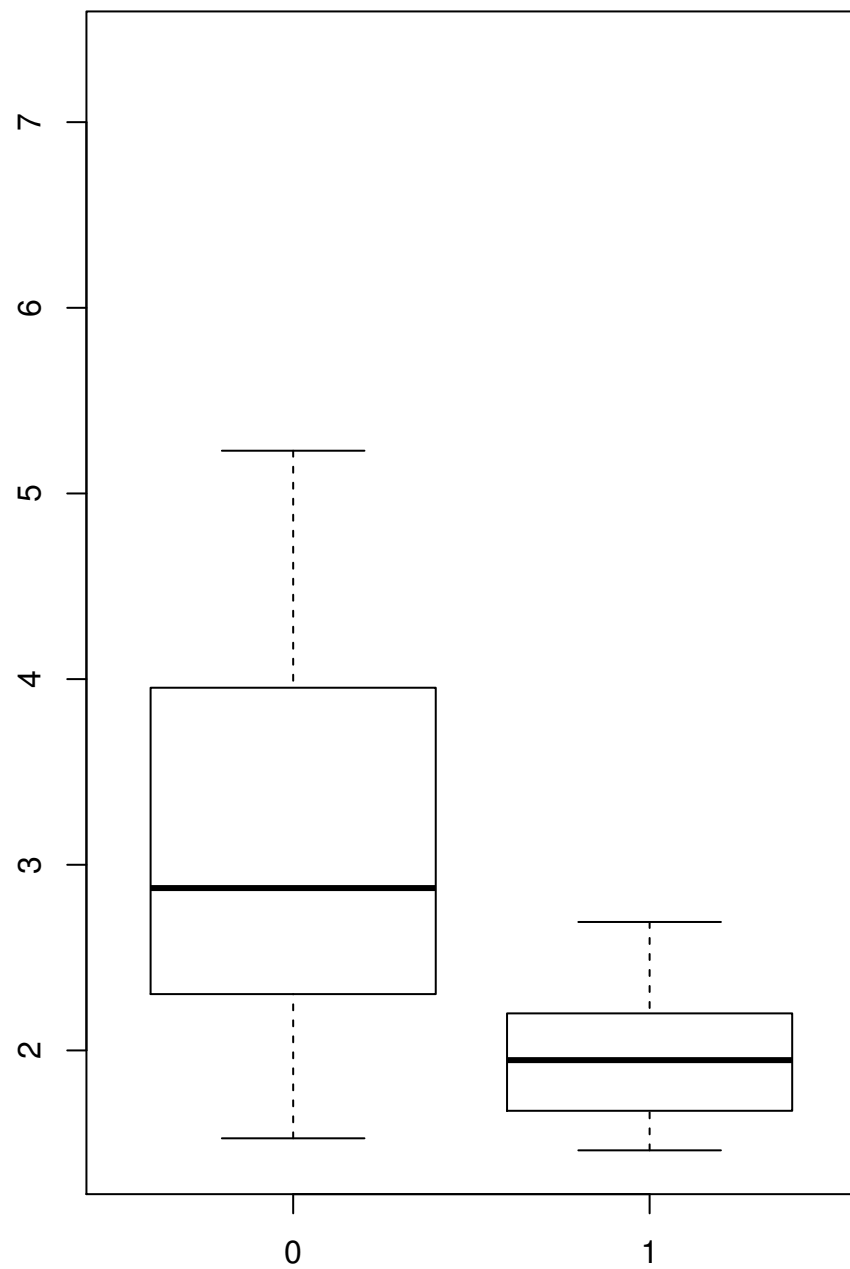

**hsa-miR-128  
(GSE67139)**

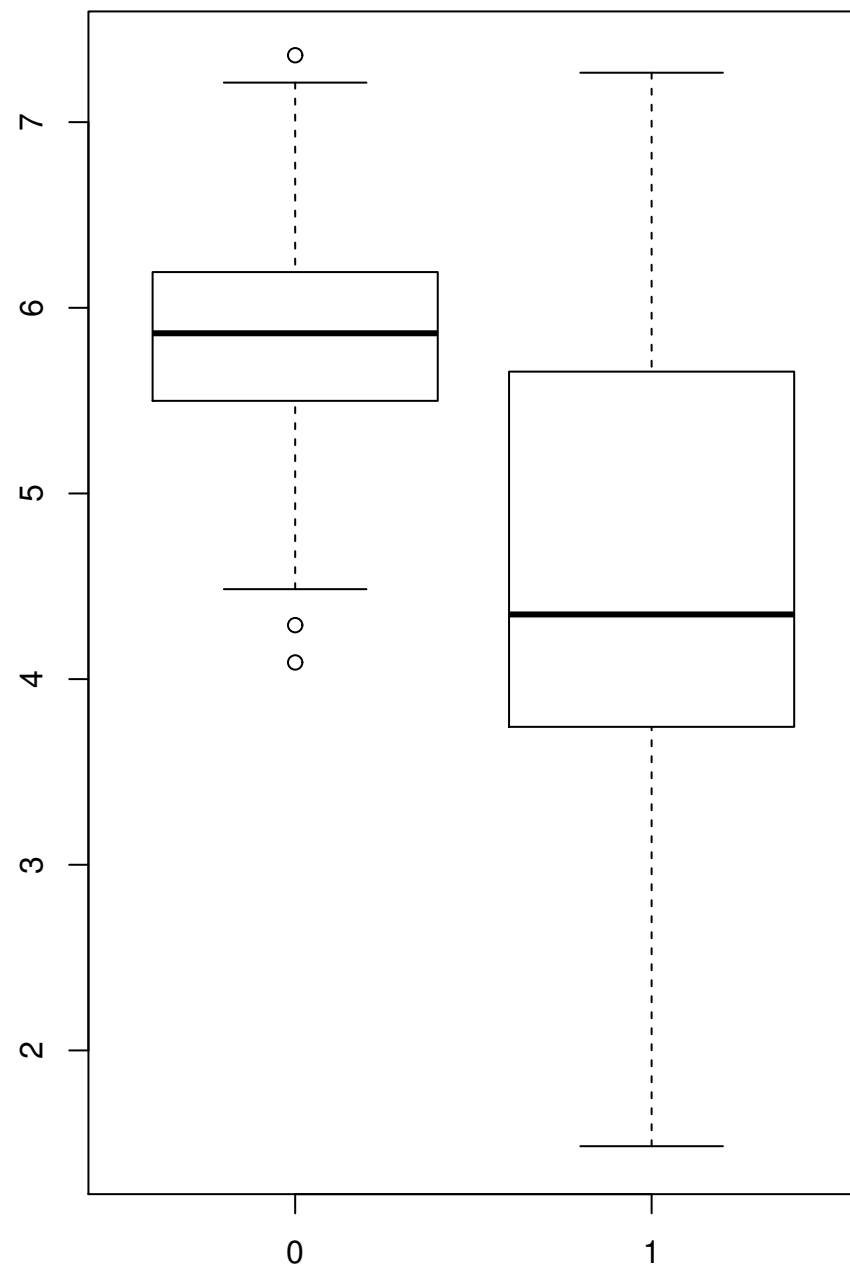

**hsa-miR-129-3p  
(GSE67138)**

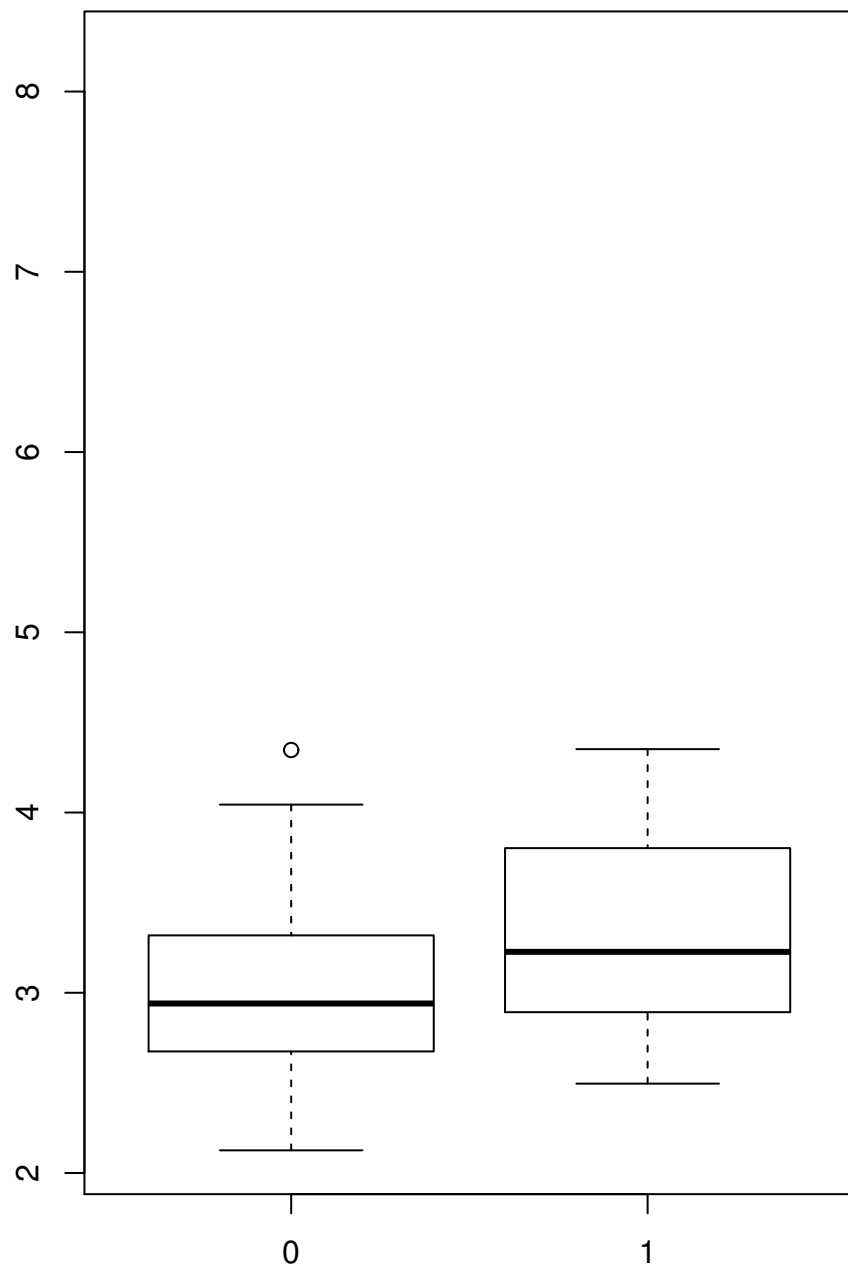

**hsa-miR-129-3p  
(GSE67139)**

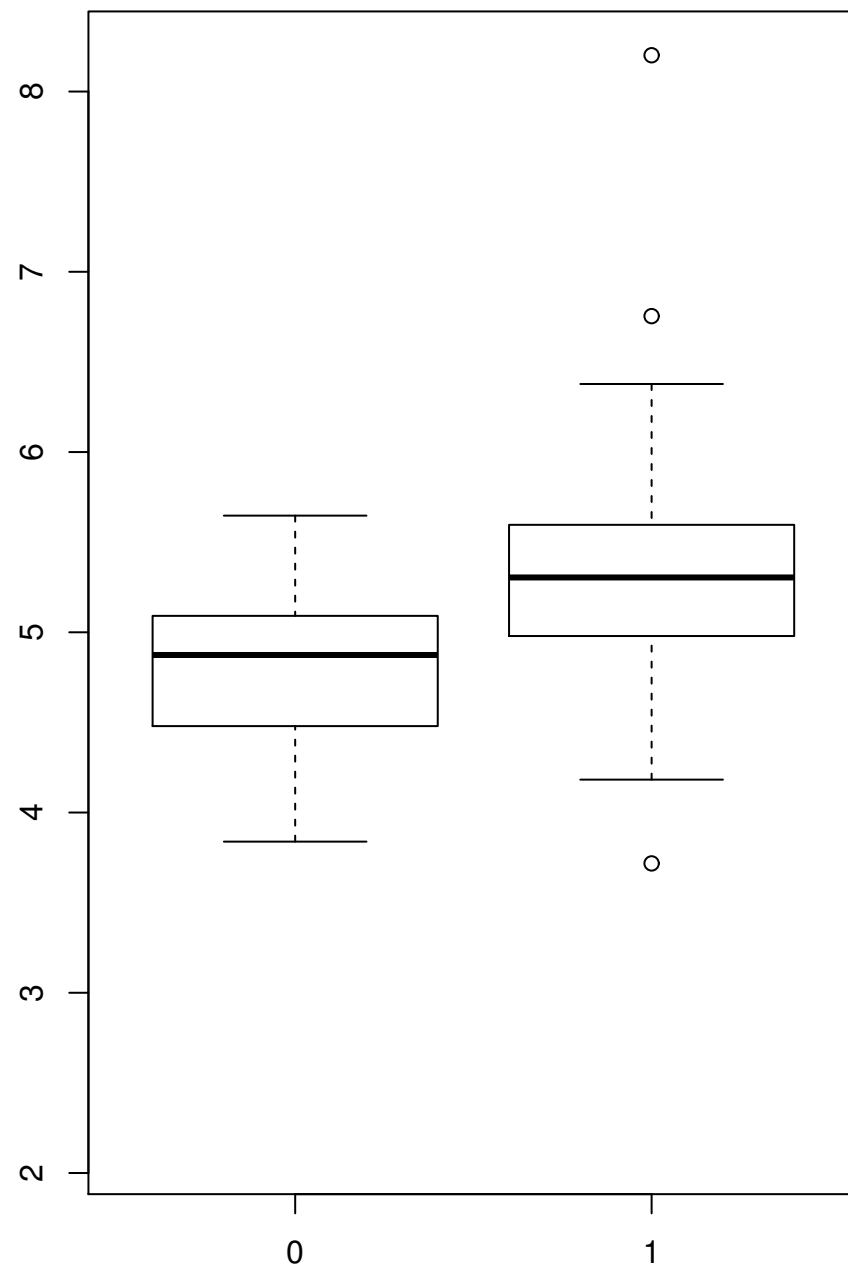



**hsa-miR-1293**  
**(GSE67138)**

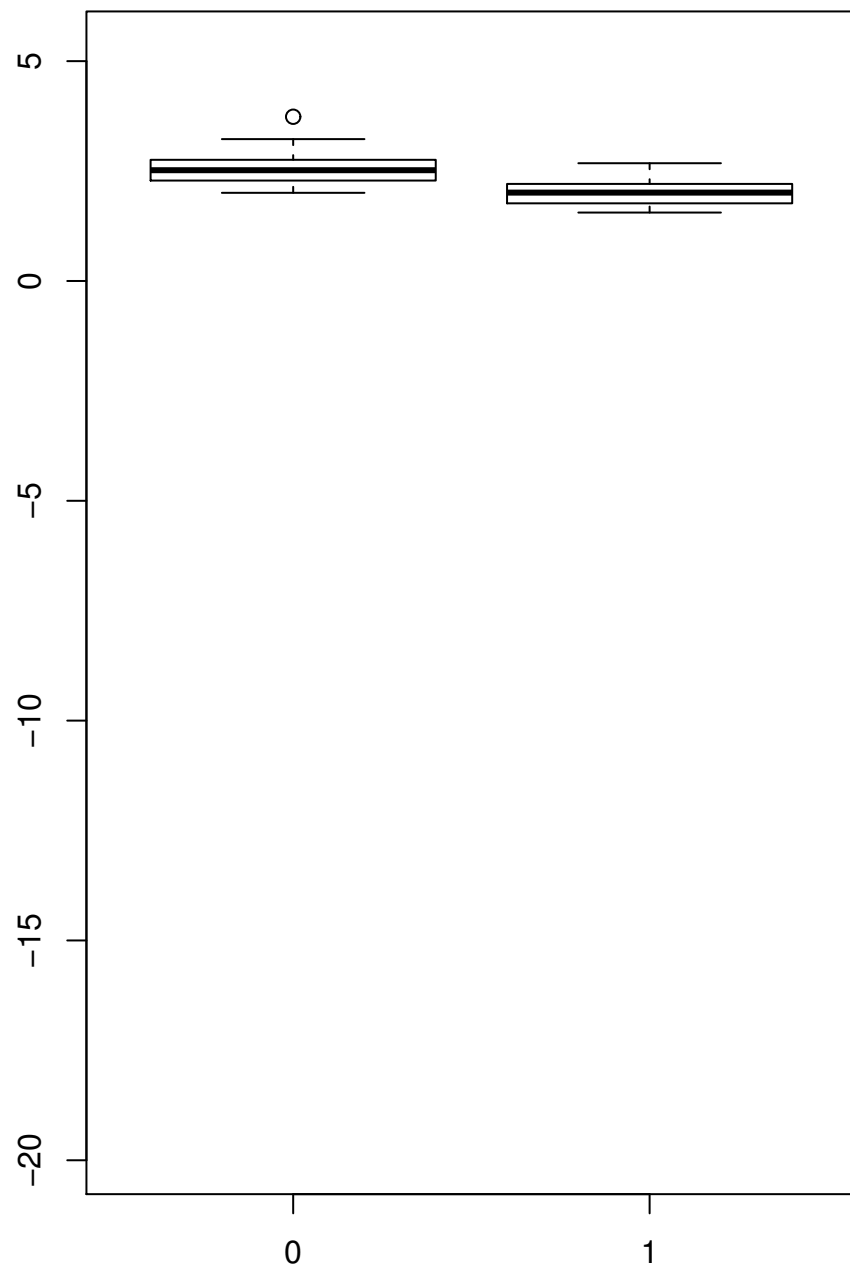

**hsa-miR-1293**  
**(GSE67139)**

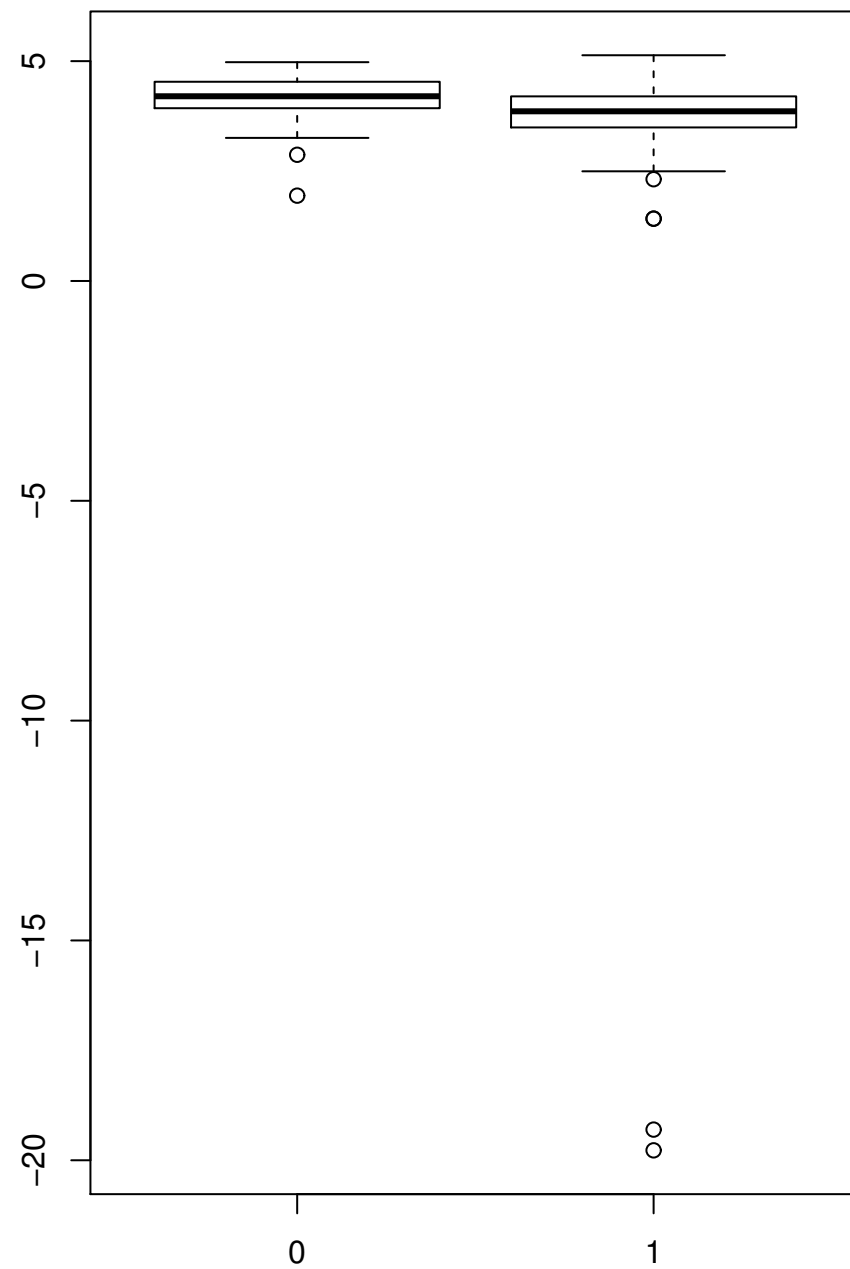

**hsa-miR-1298  
(GSE67138)**

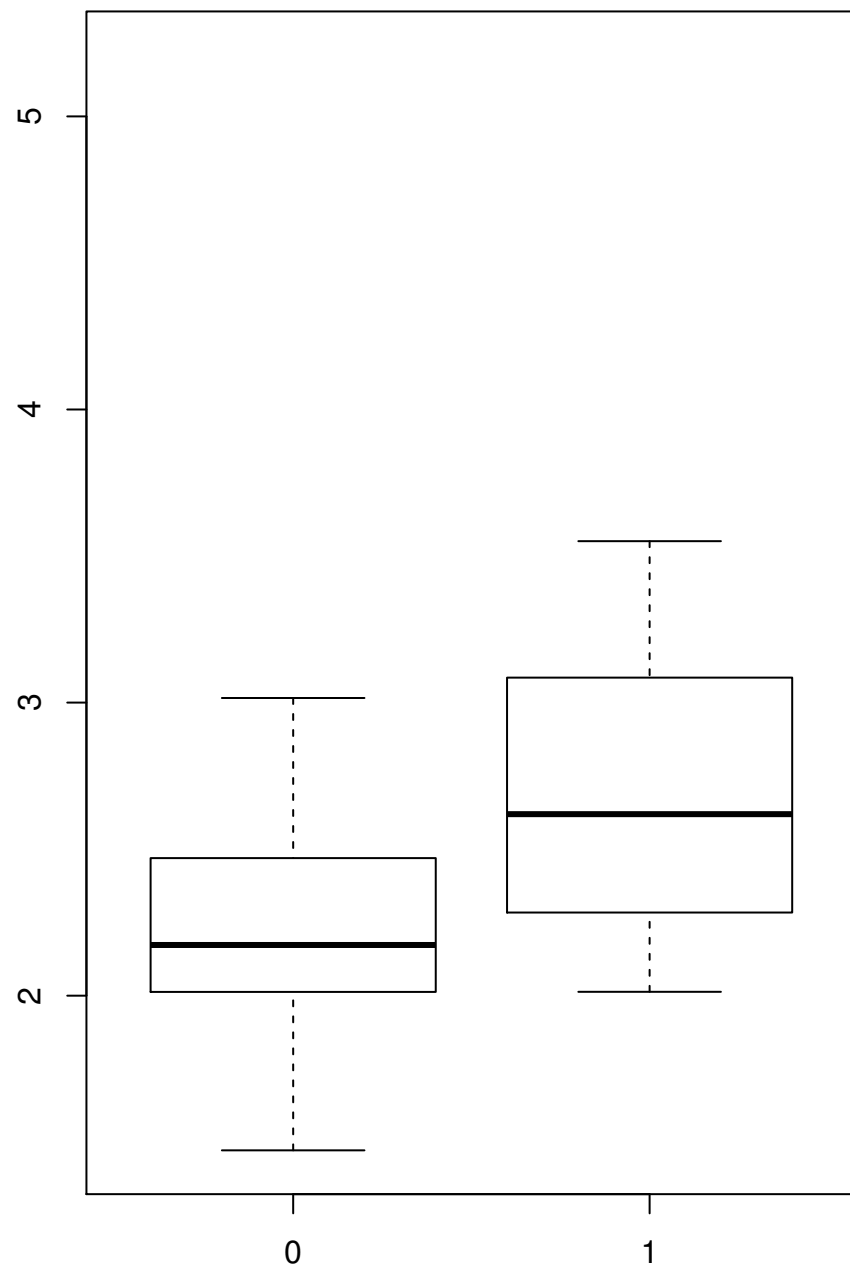

**hsa-miR-1298  
(GSE67139)**

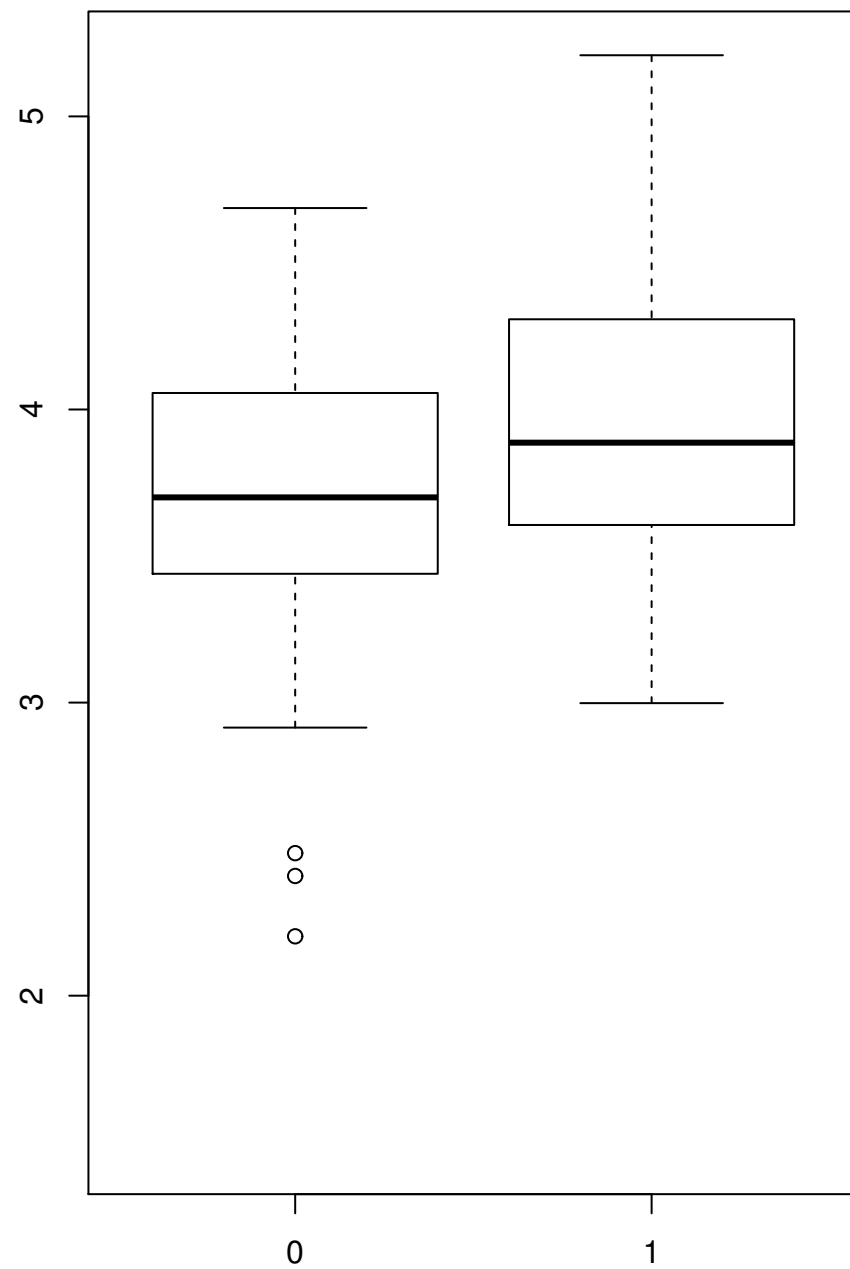

**hsa-miR-130a  
(GSE67138)**

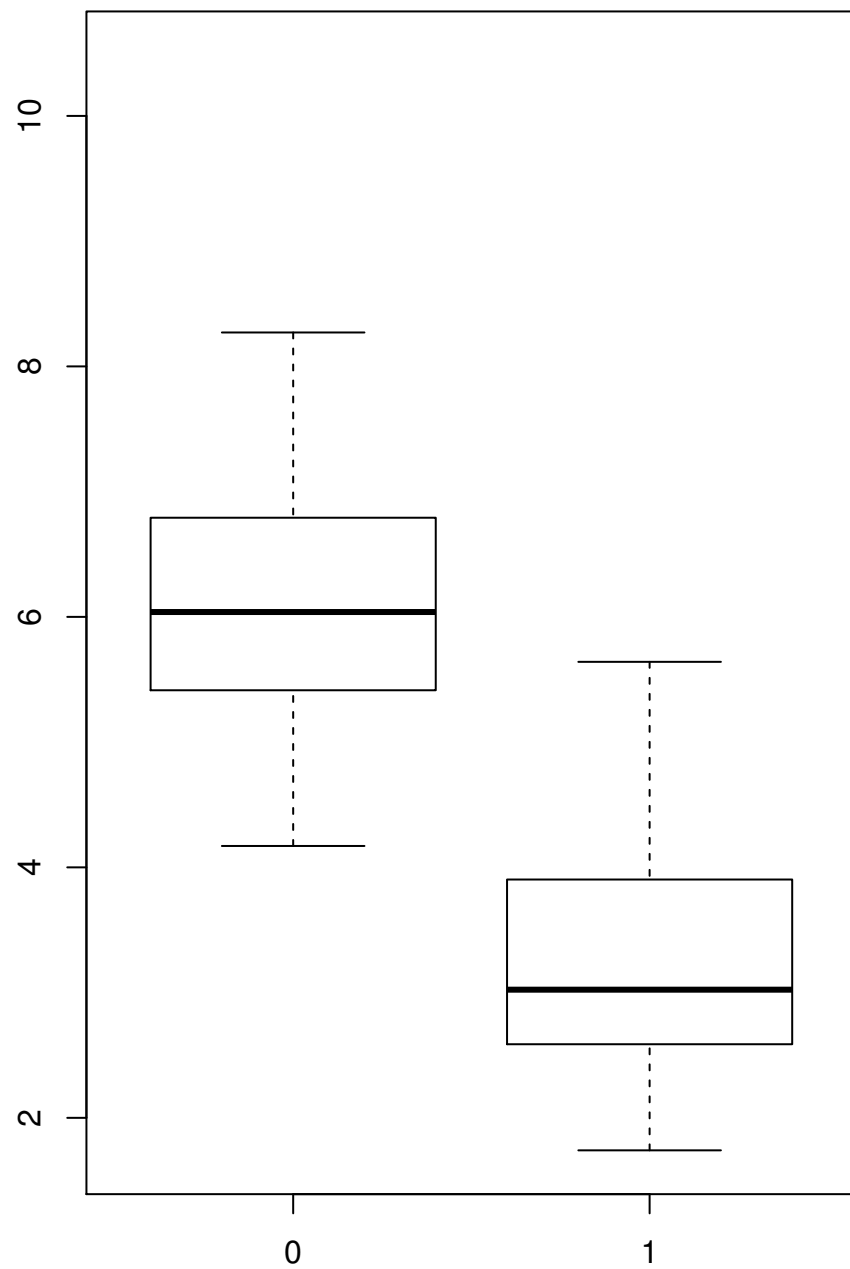

**hsa-miR-130a  
(GSE67139)**

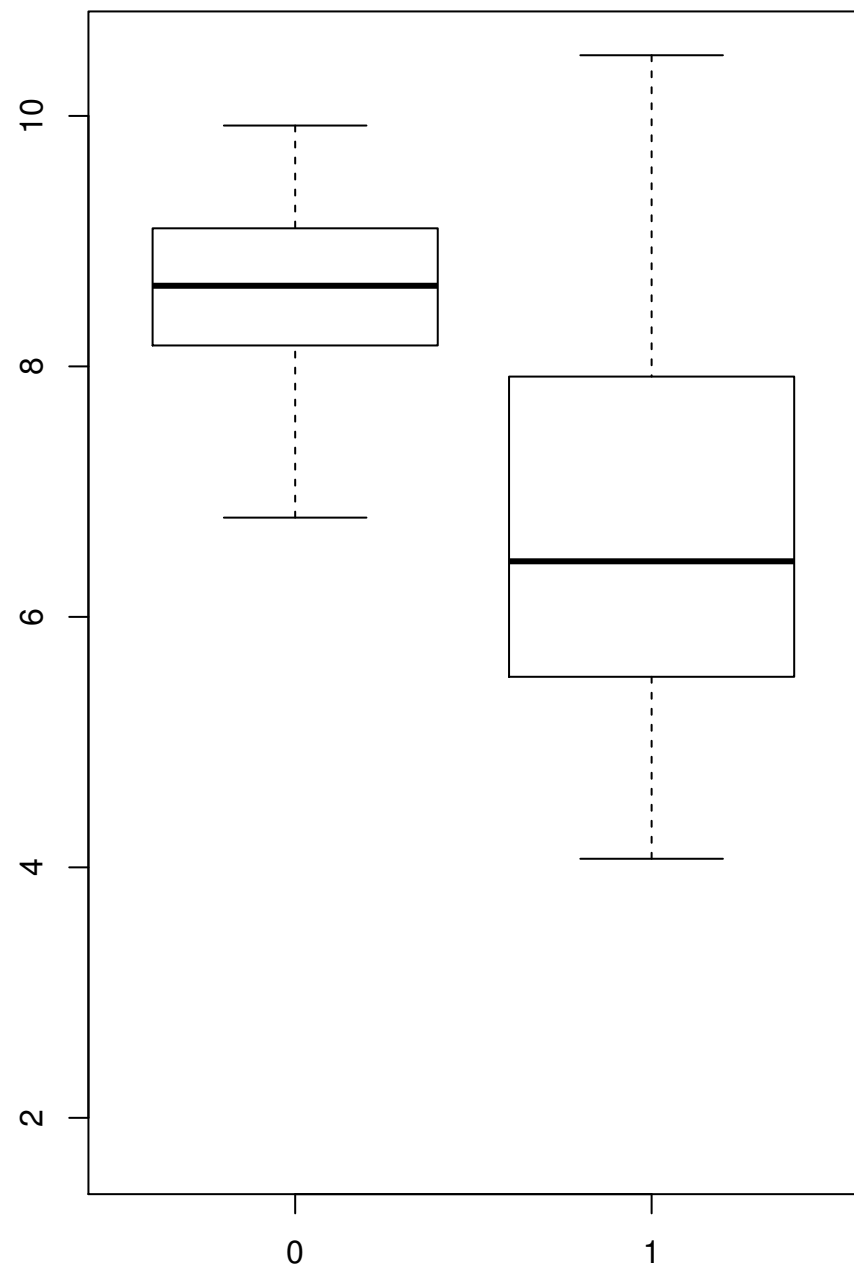

**hsa-miR-1321  
(GSE67138)**

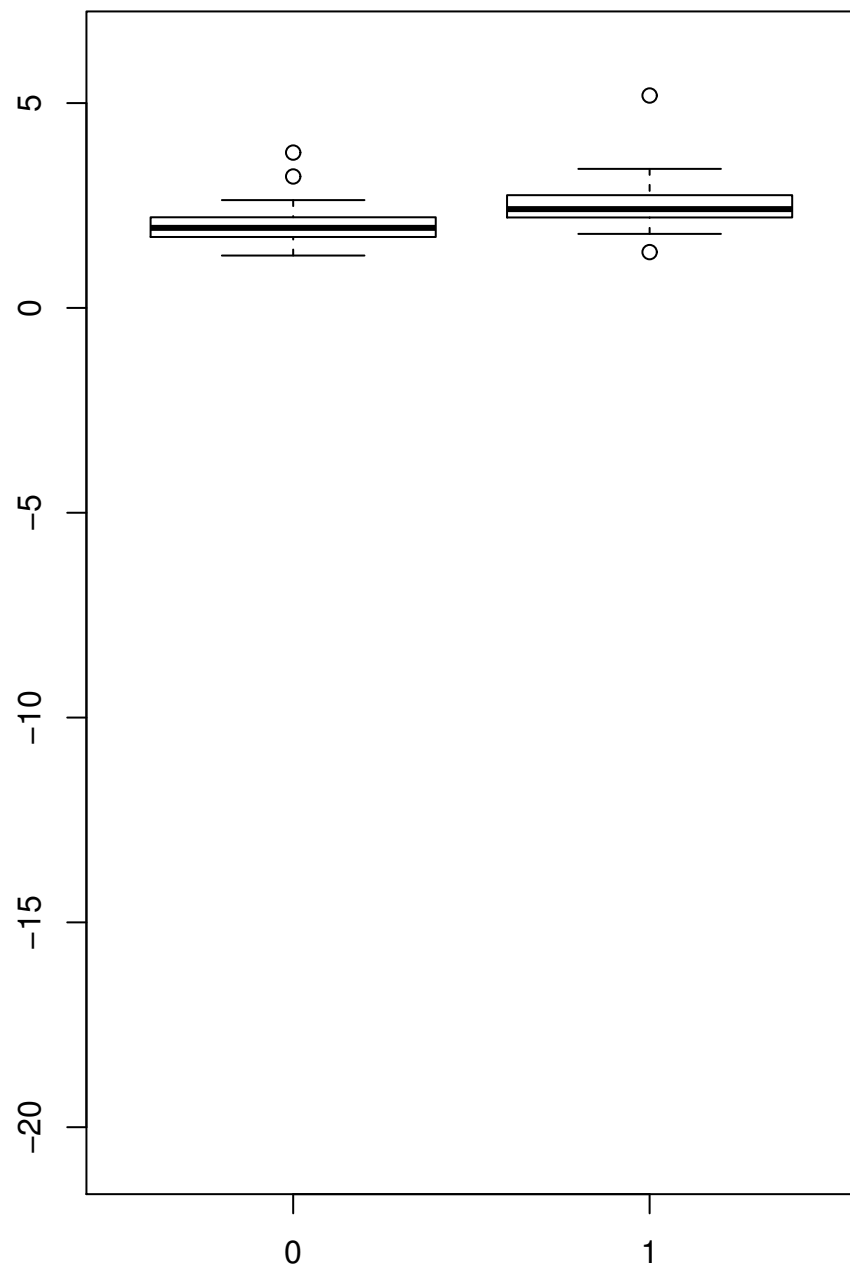

**hsa-miR-1321  
(GSE67139)**

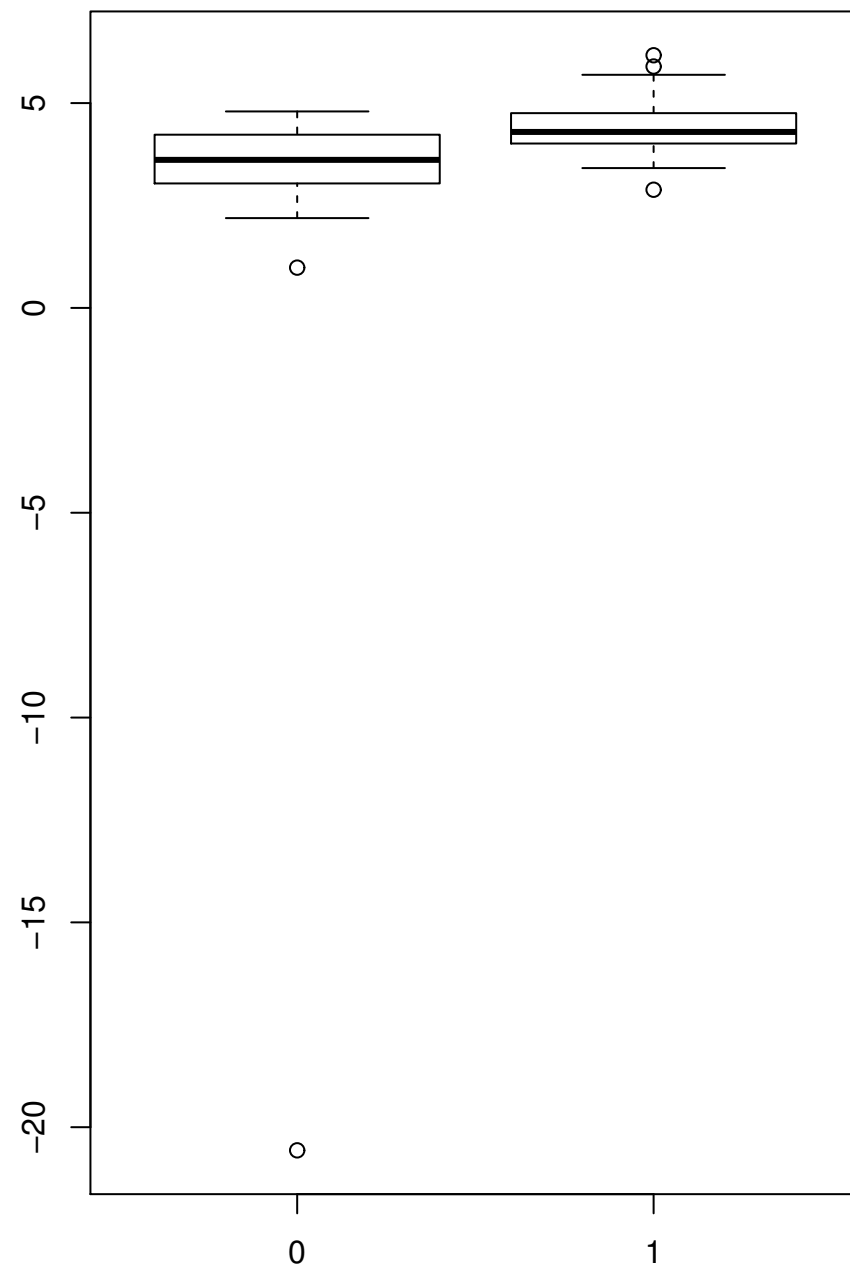

**hsa-miR-1323  
(GSE67138)**

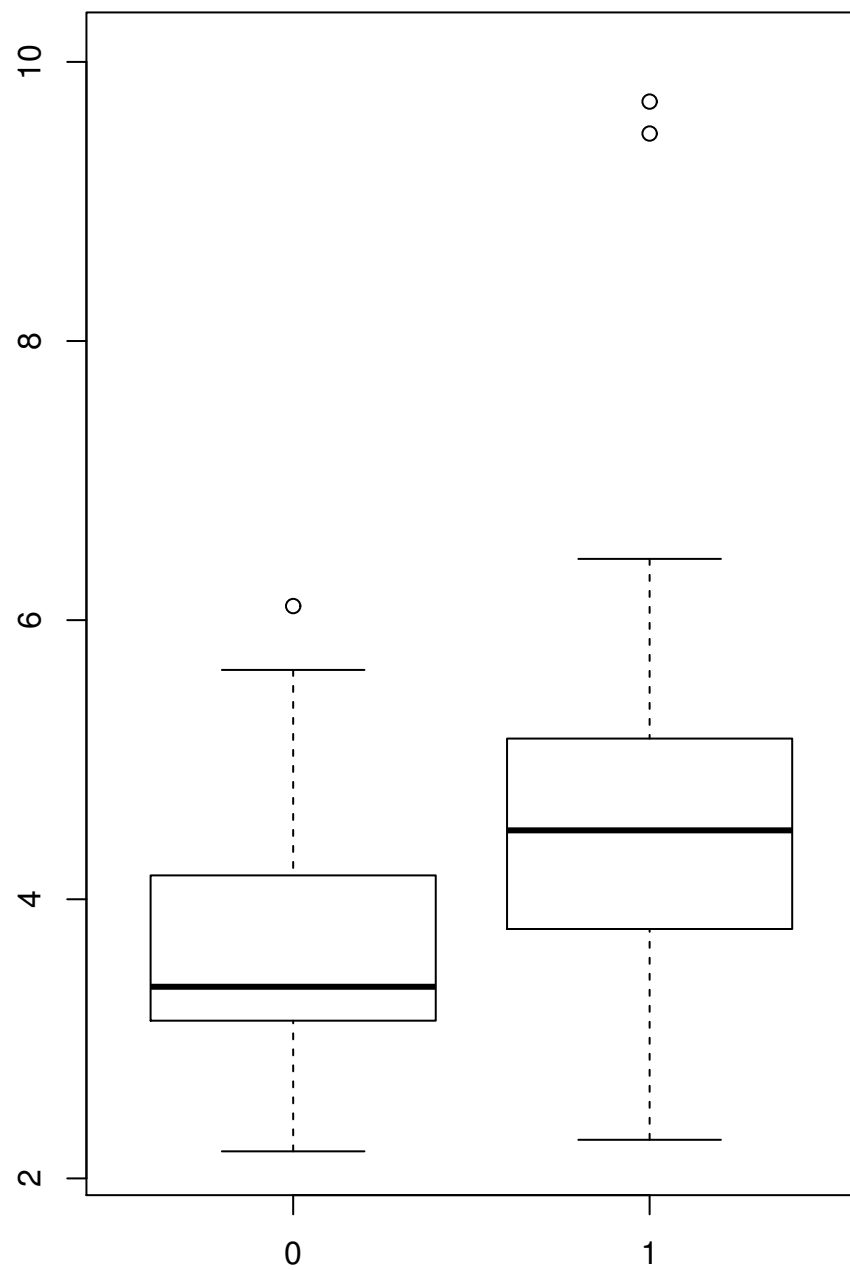

**hsa-miR-1323  
(GSE67139)**

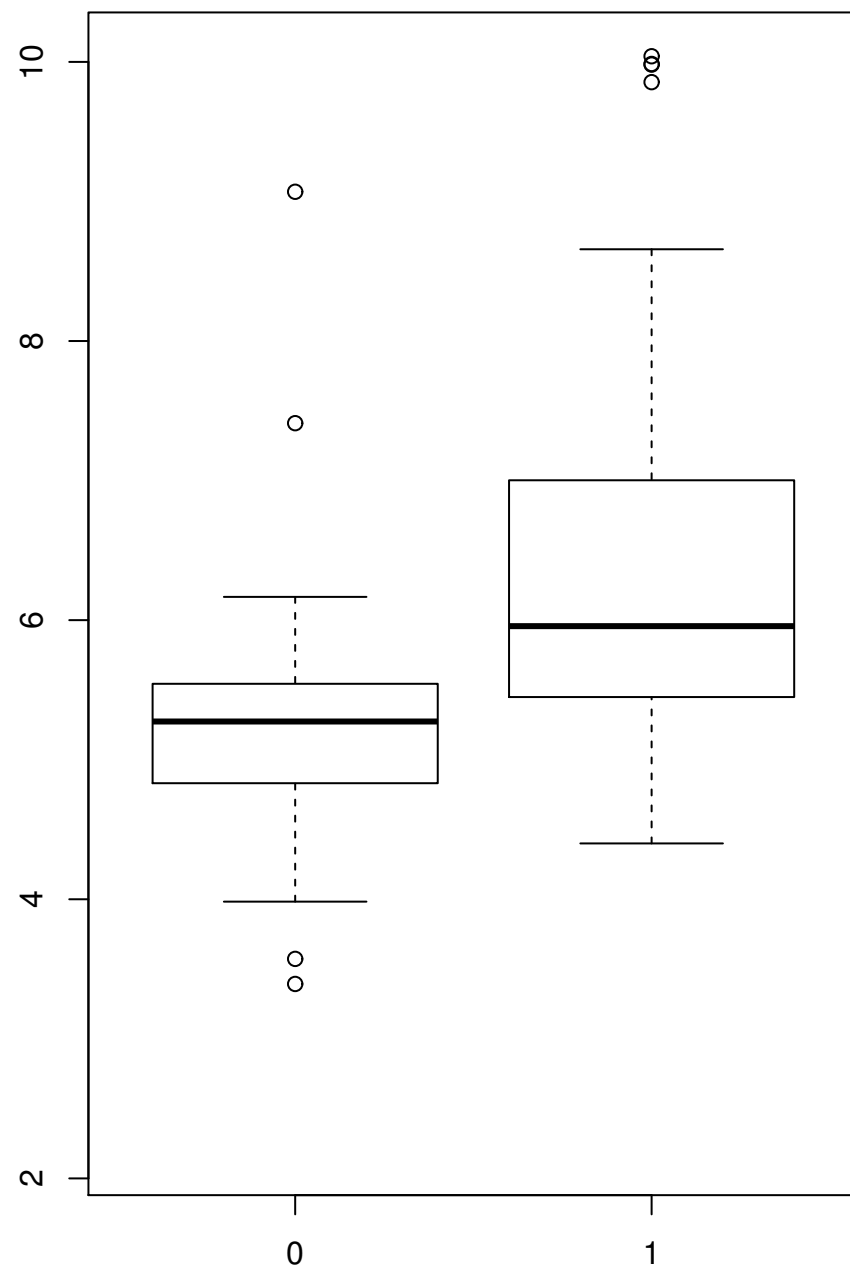

**hsa-miR-132**  
**(GSE67138)**

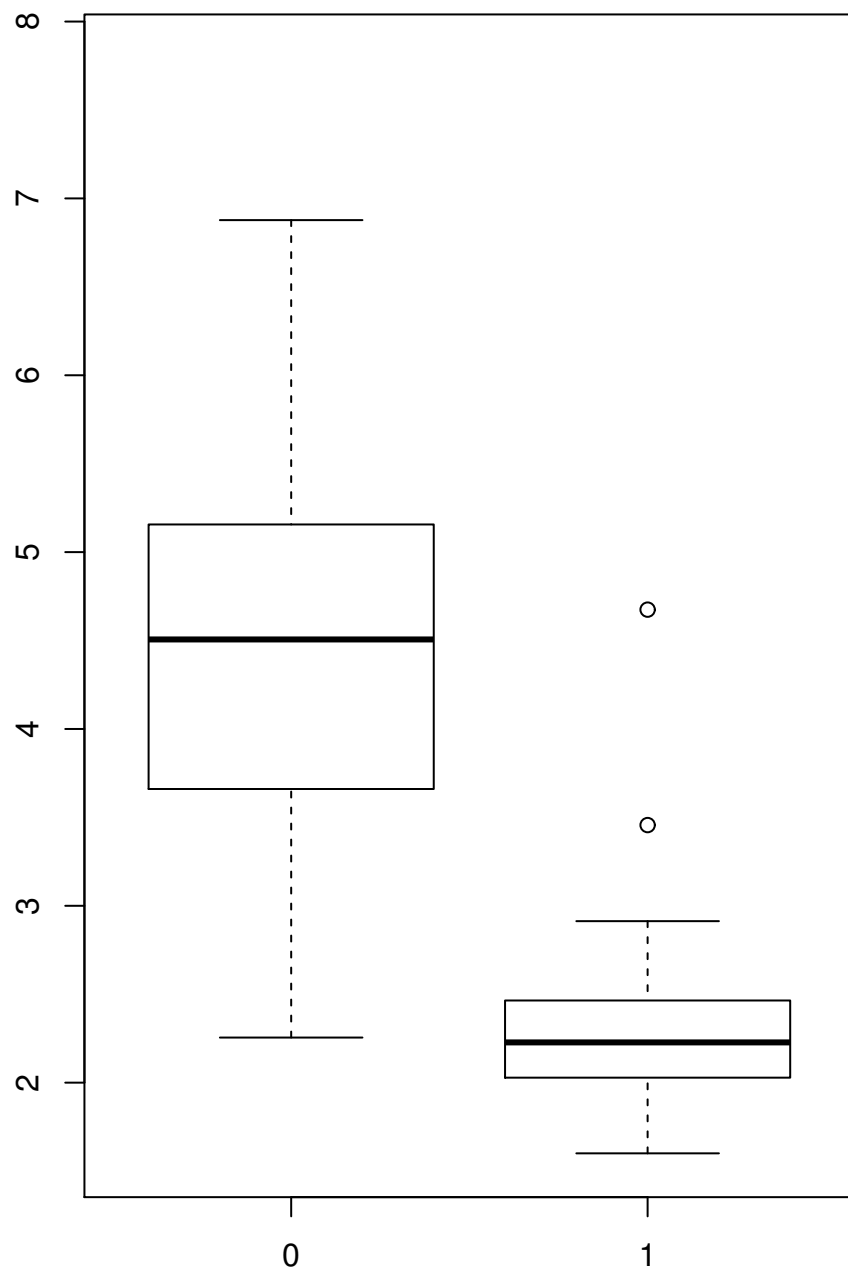

**hsa-miR-132**  
**(GSE67139)**

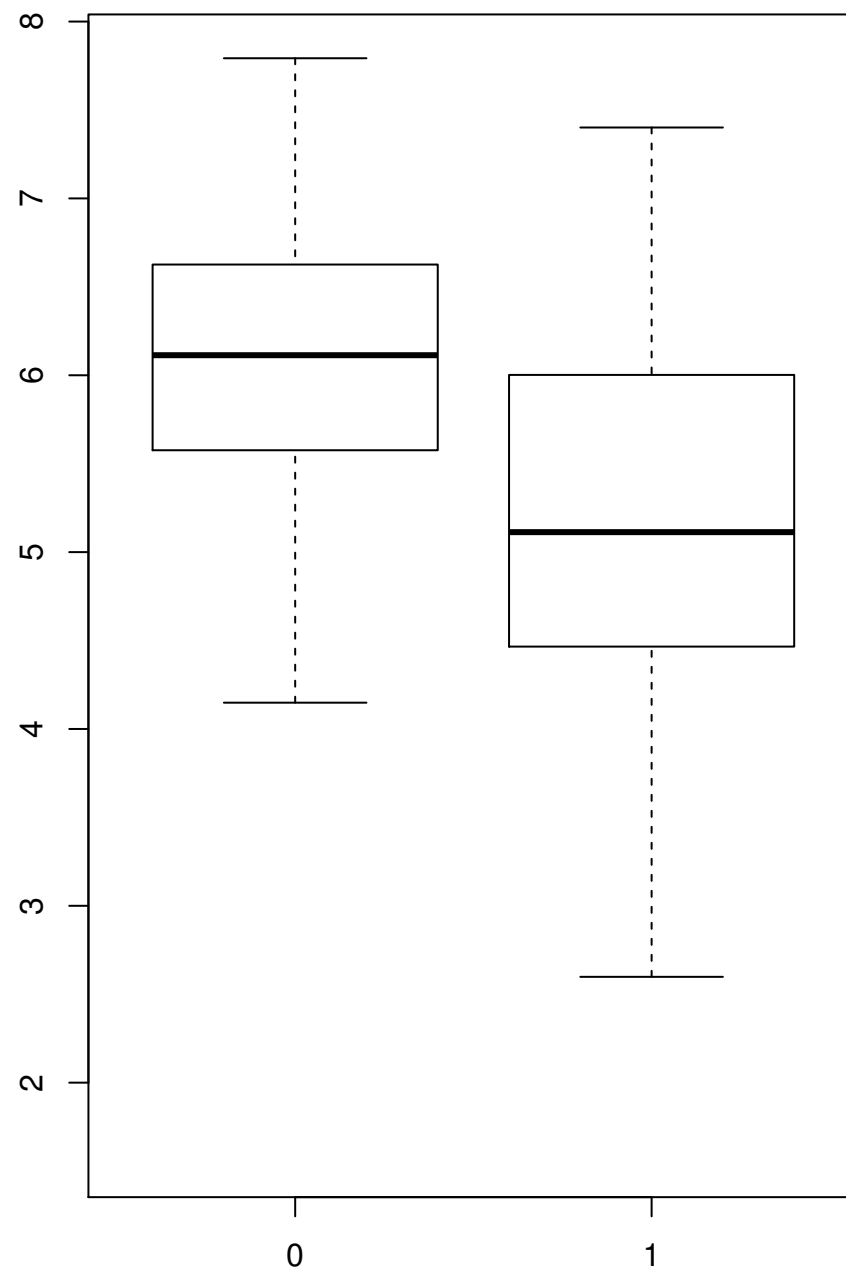

**hsa-miR-134  
(GSE67138)**

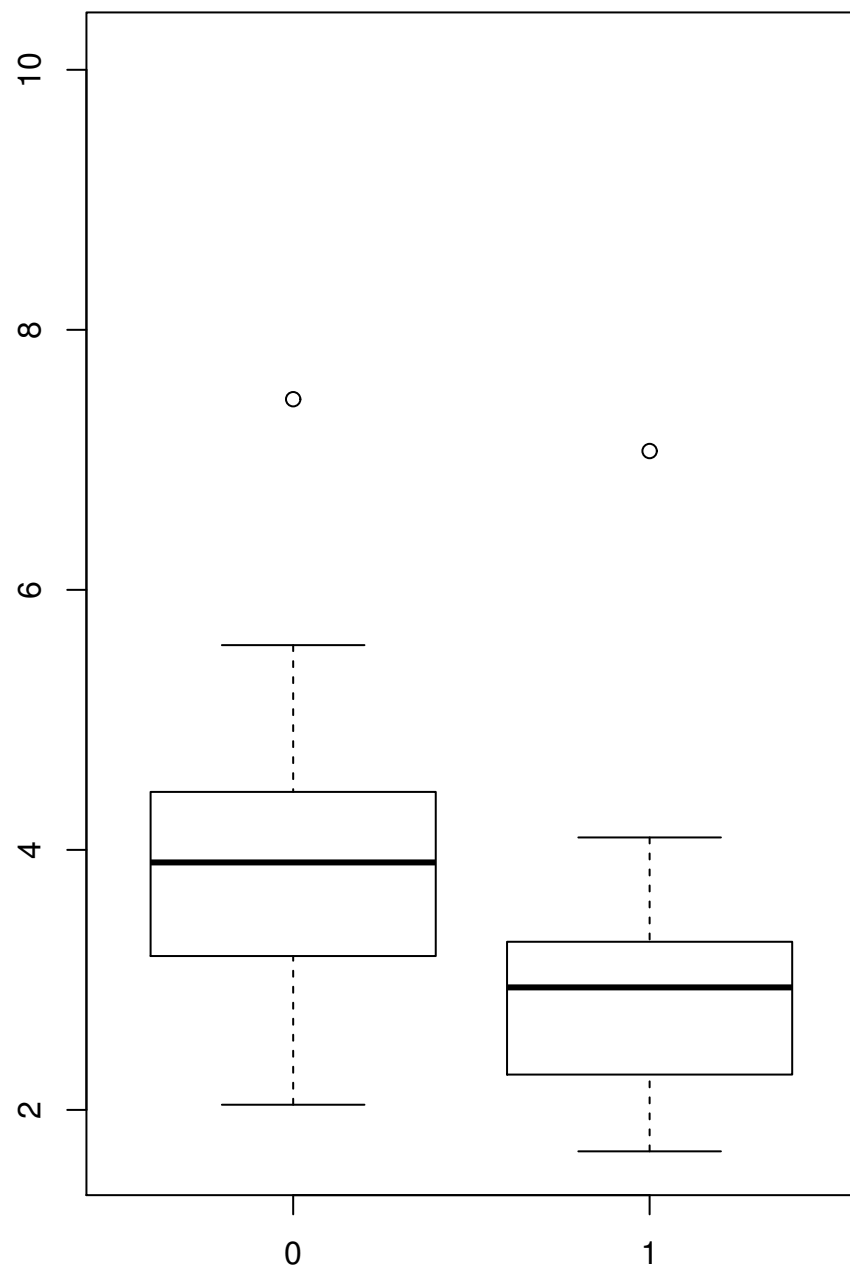

**hsa-miR-134  
(GSE67139)**

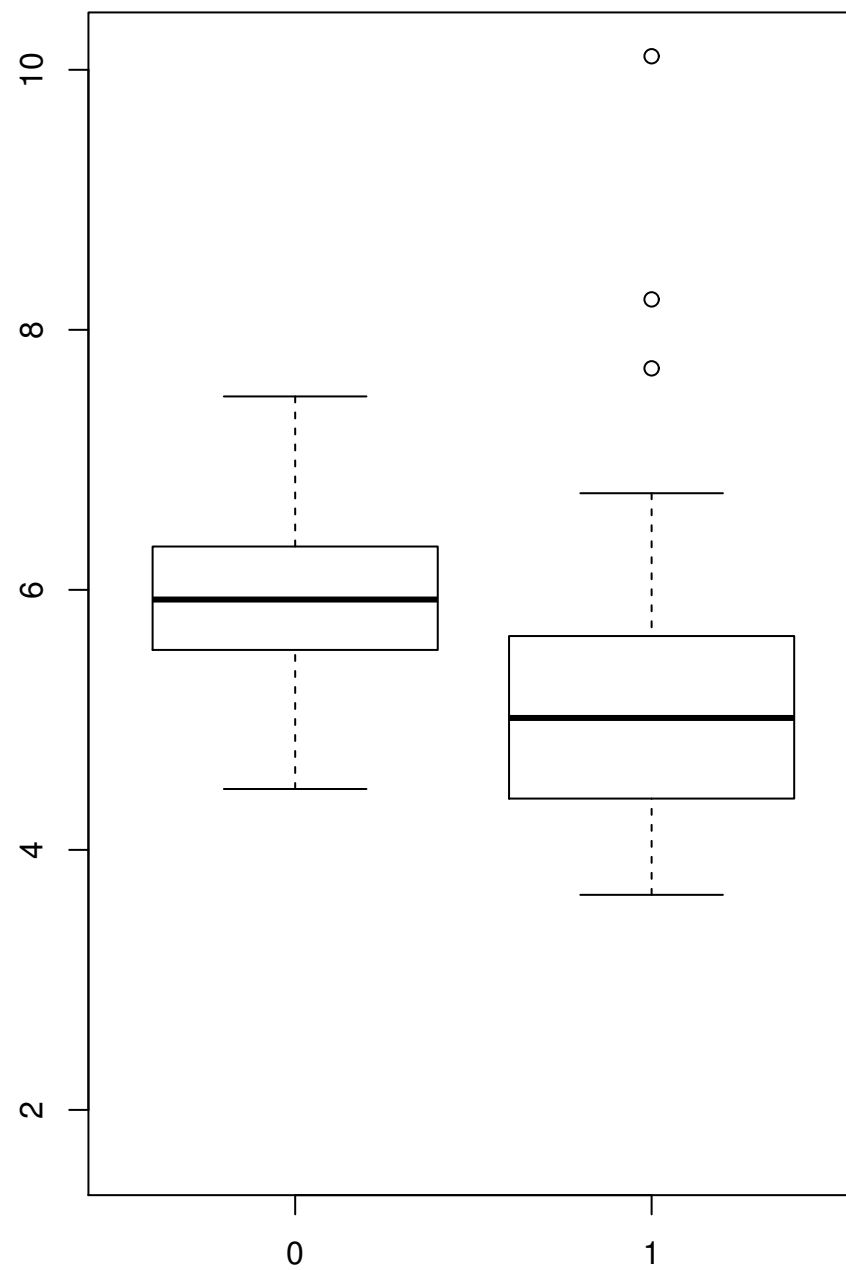

**hsa-miR-135a-star**  
**(GSE67138)**

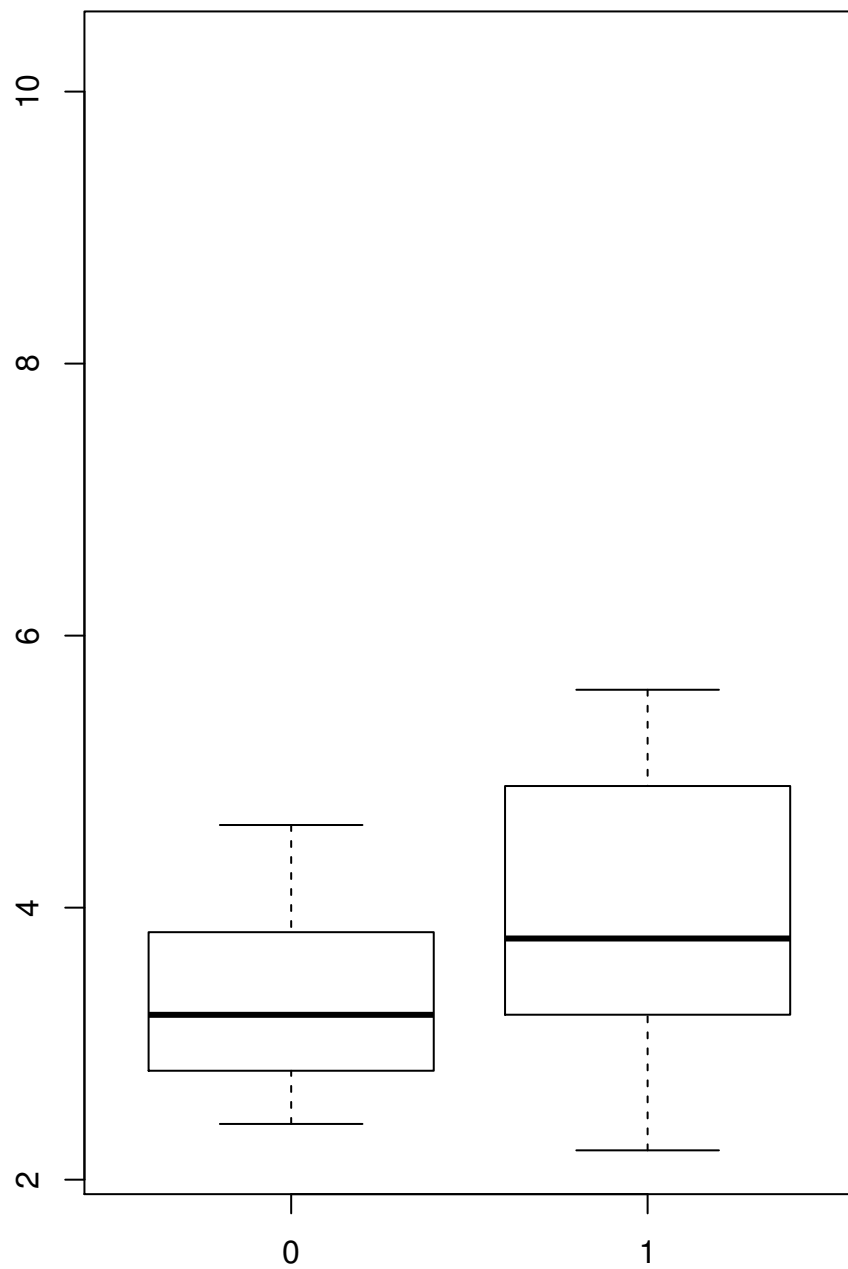

**hsa-miR-135a-star**  
**(GSE67139)**

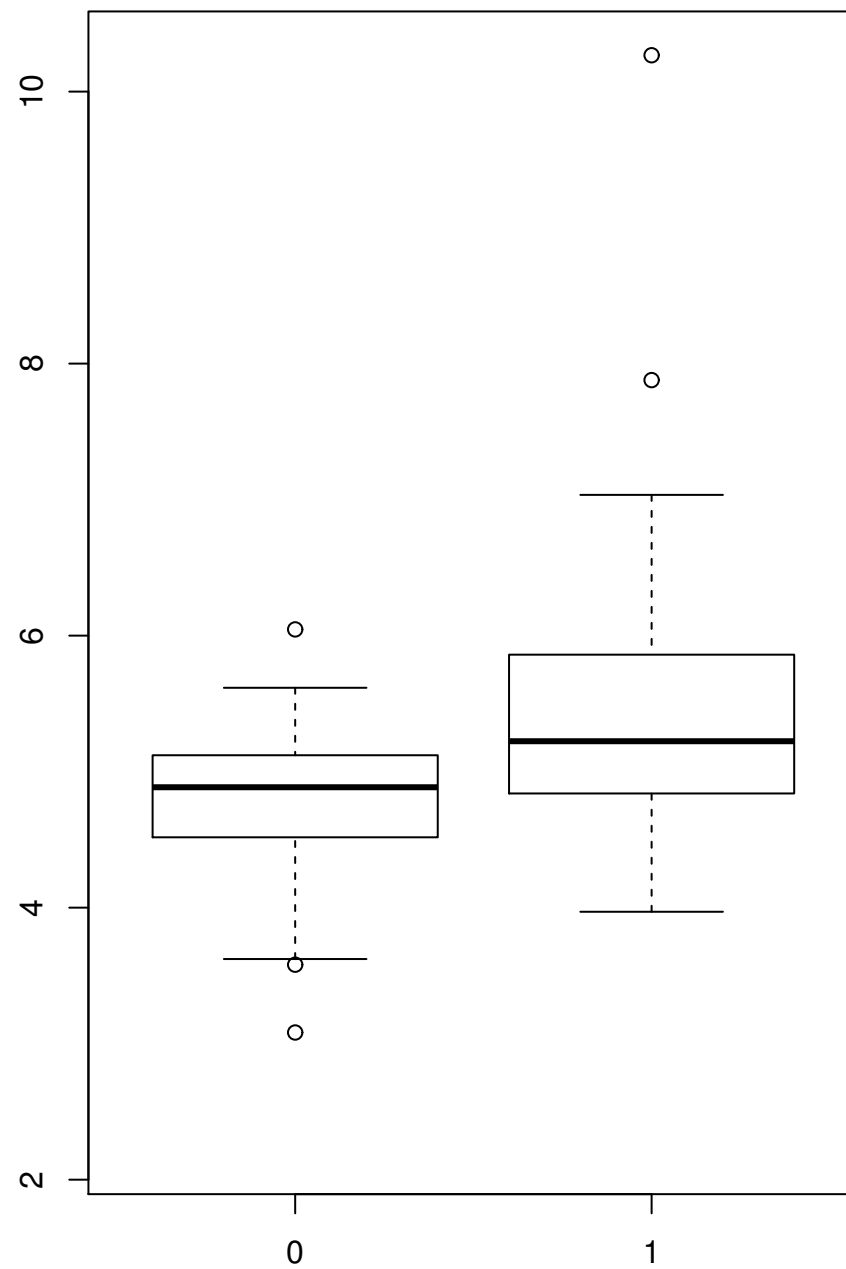



**hsa-miR-138**  
**(GSE67138)**

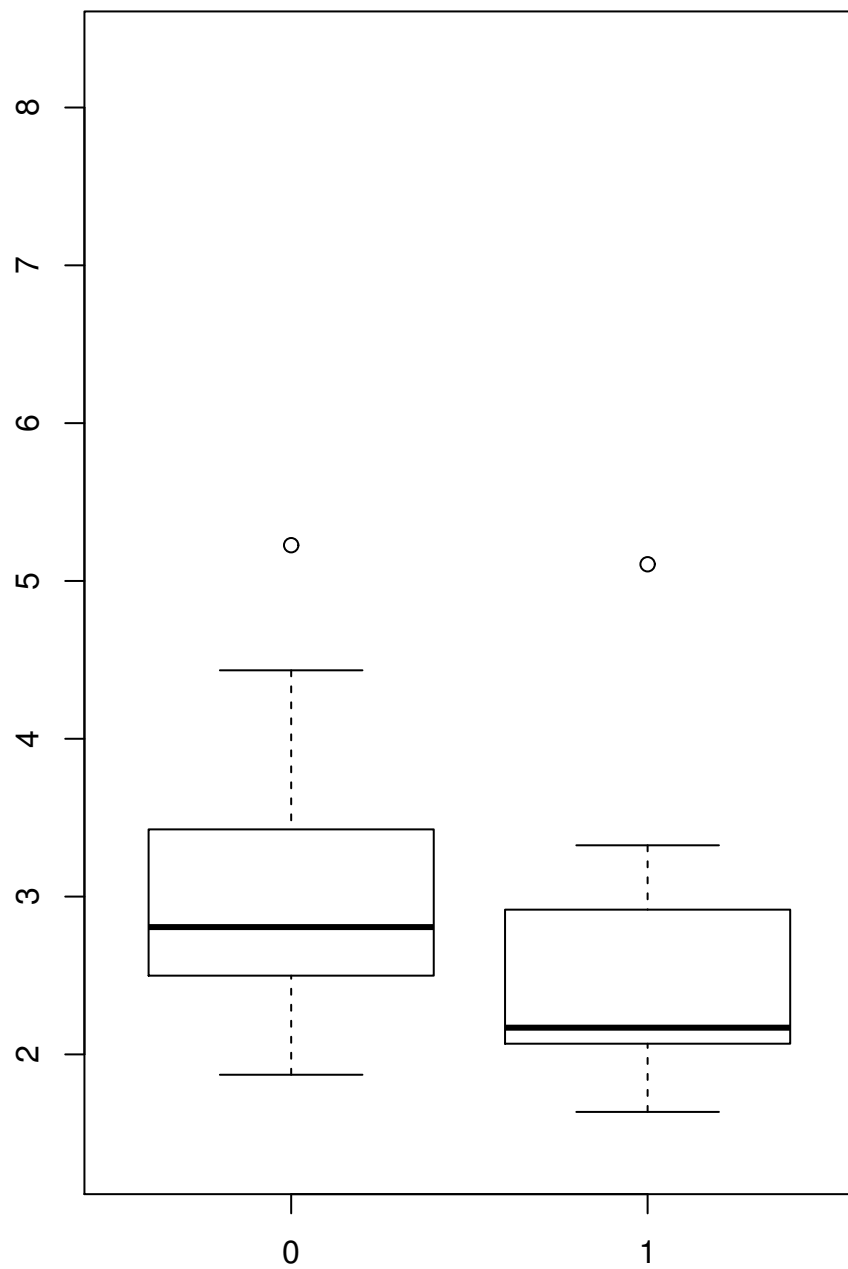

**hsa-miR-138**  
**(GSE67139)**

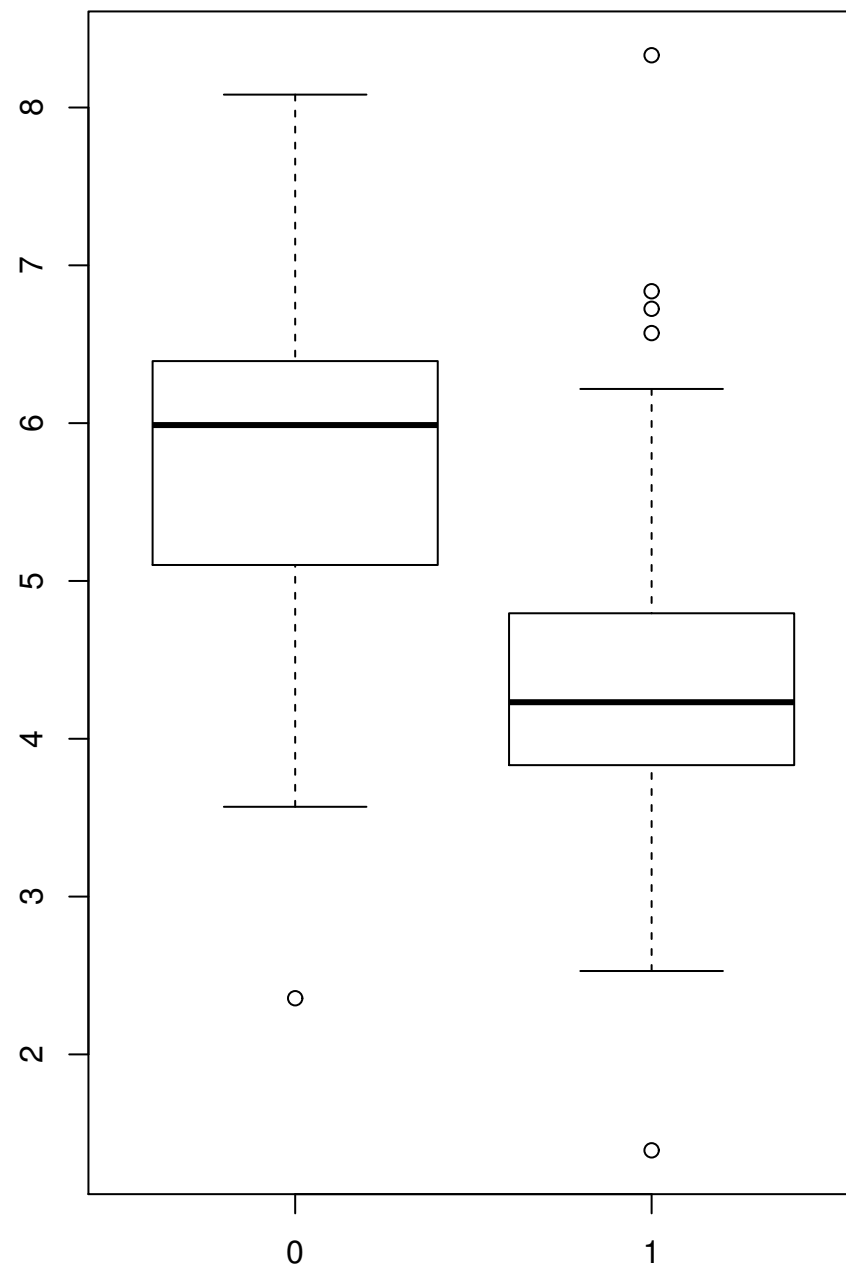

**hsa-miR-139-3p**  
**(GSE67138)**

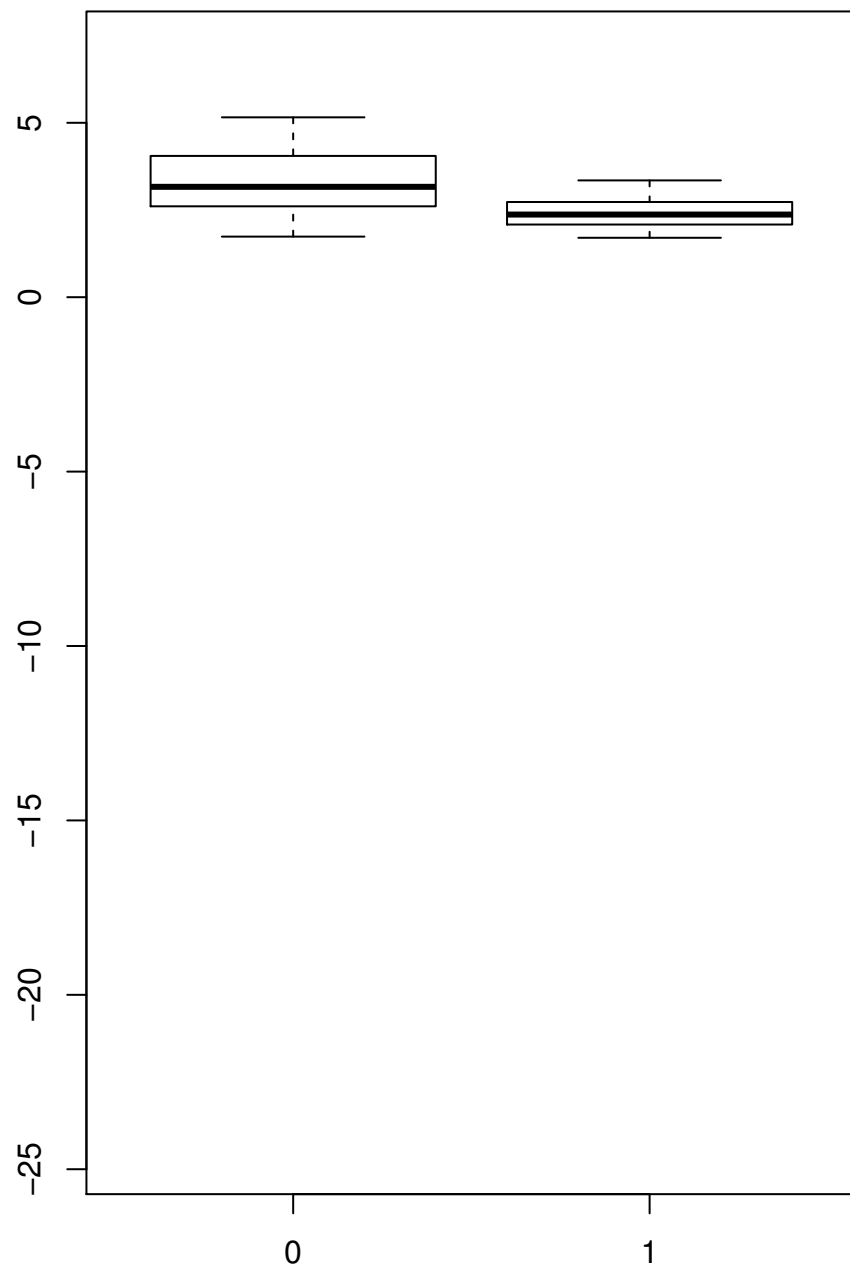

**hsa-miR-139-3p**  
**(GSE67139)**

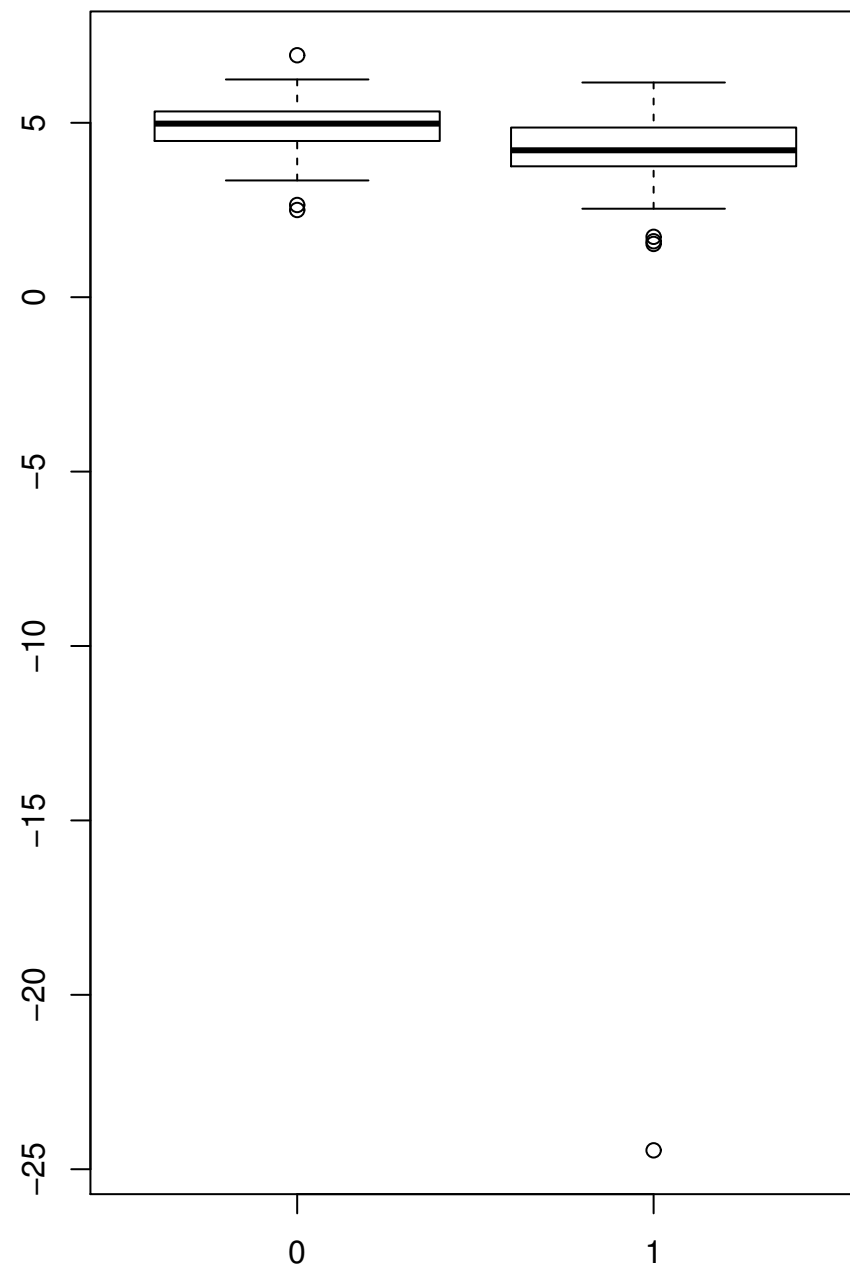

**hsa-miR-139-5p  
(GSE67138)**

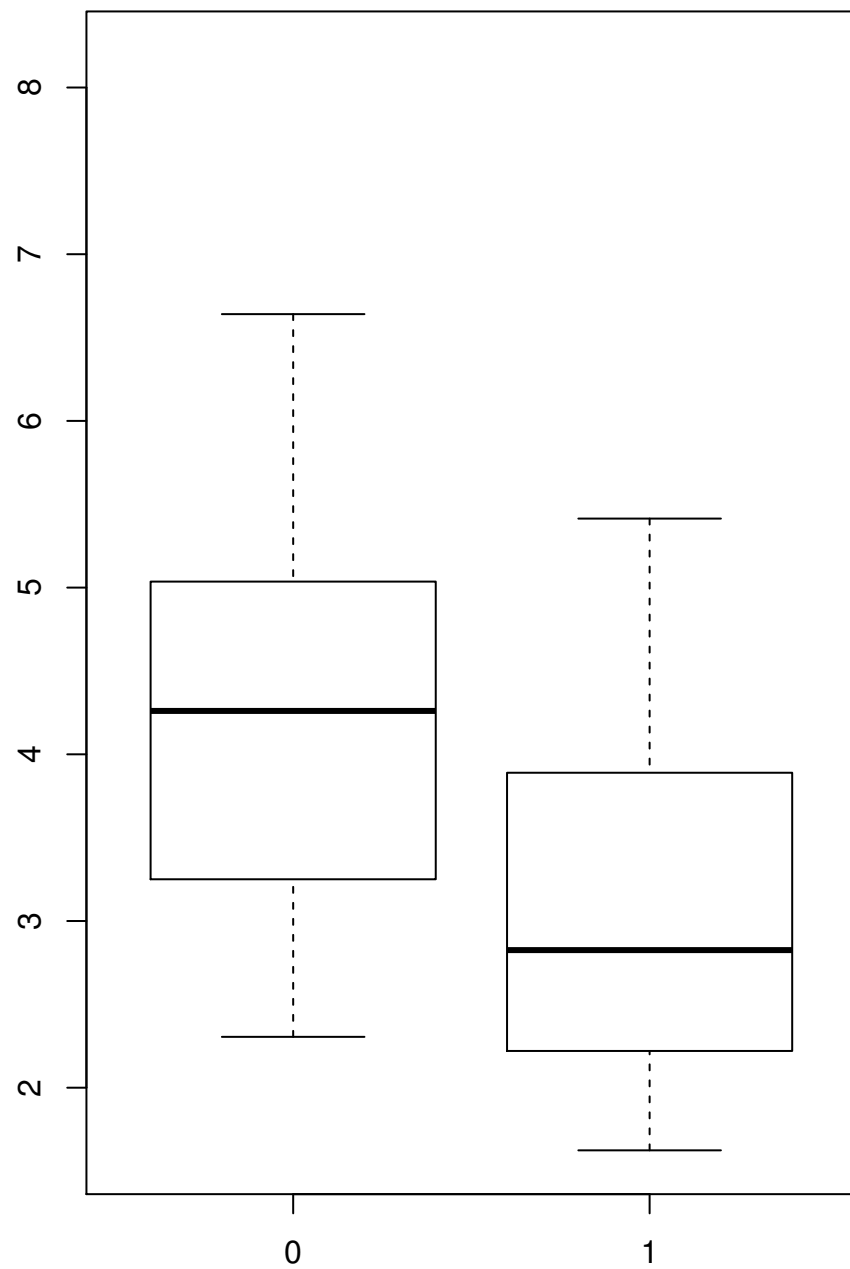

**hsa-miR-139-5p  
(GSE67139)**

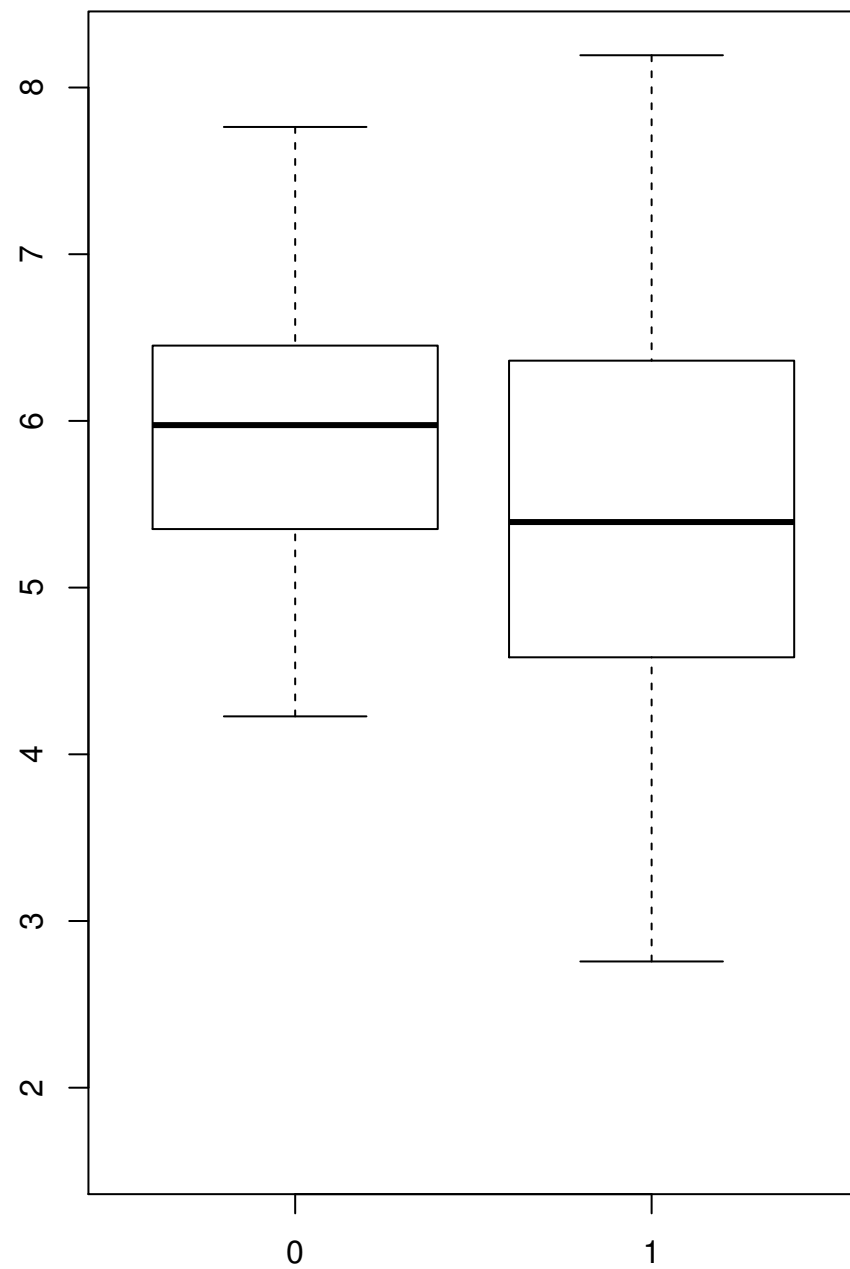

**hsa-miR-140-5p  
(GSE67138)**

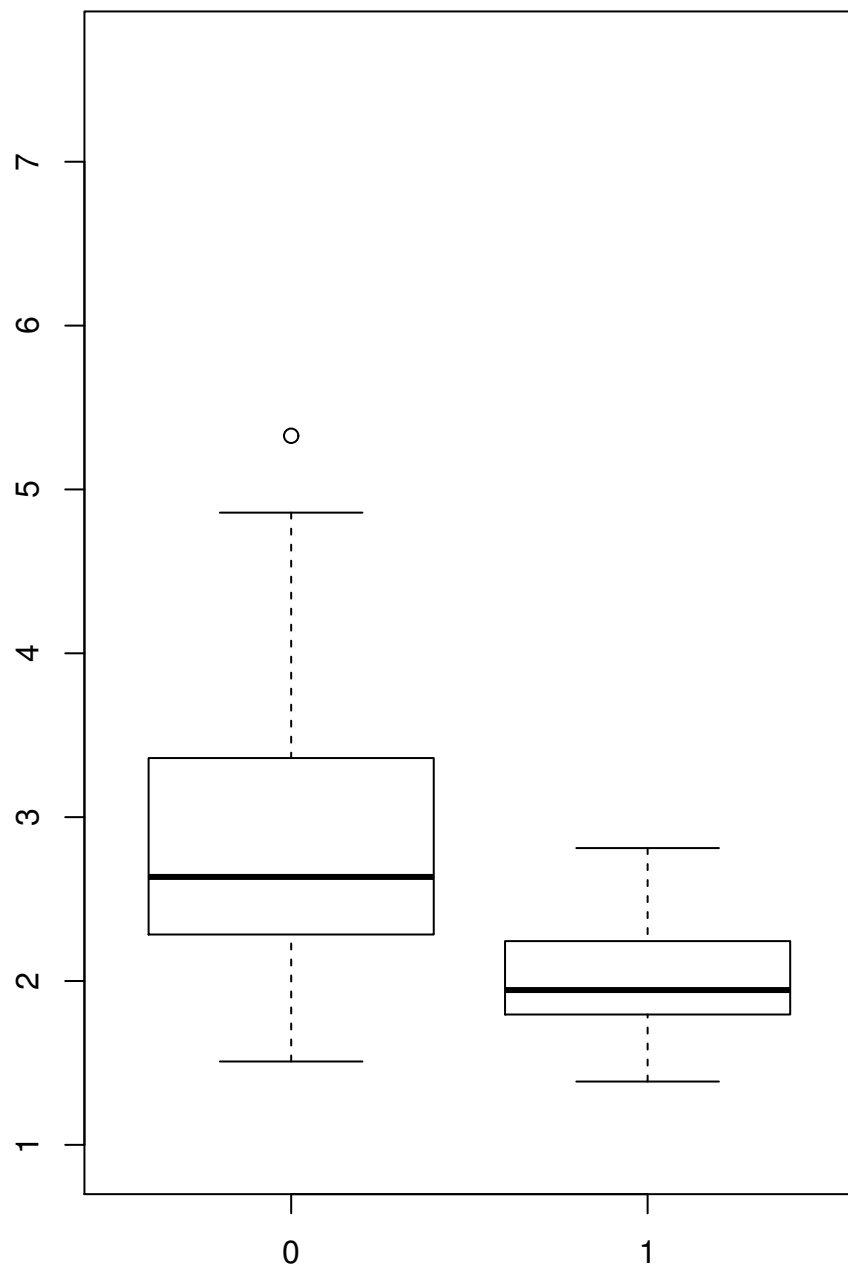

**hsa-miR-140-5p  
(GSE67139)**

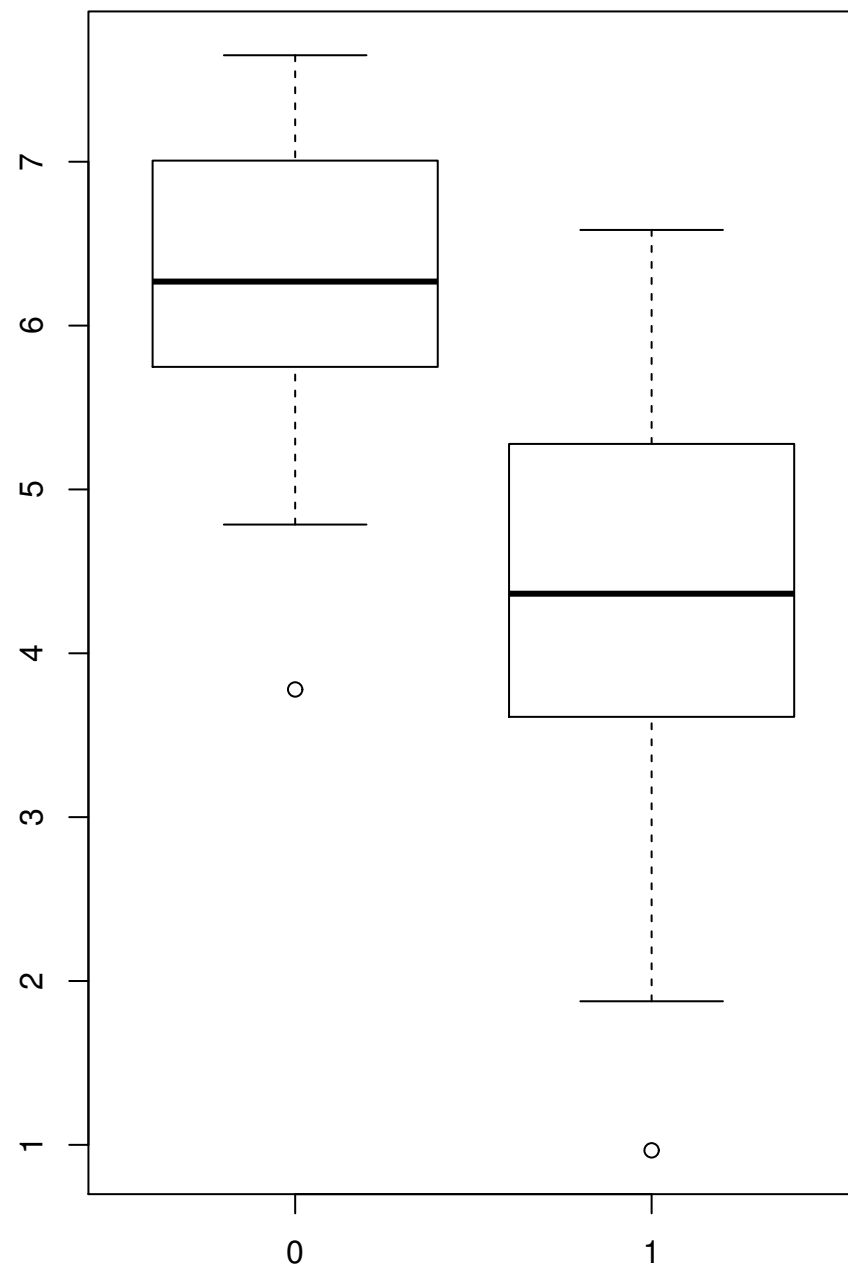

**hsa-miR-143-star**  
**(GSE67138)**

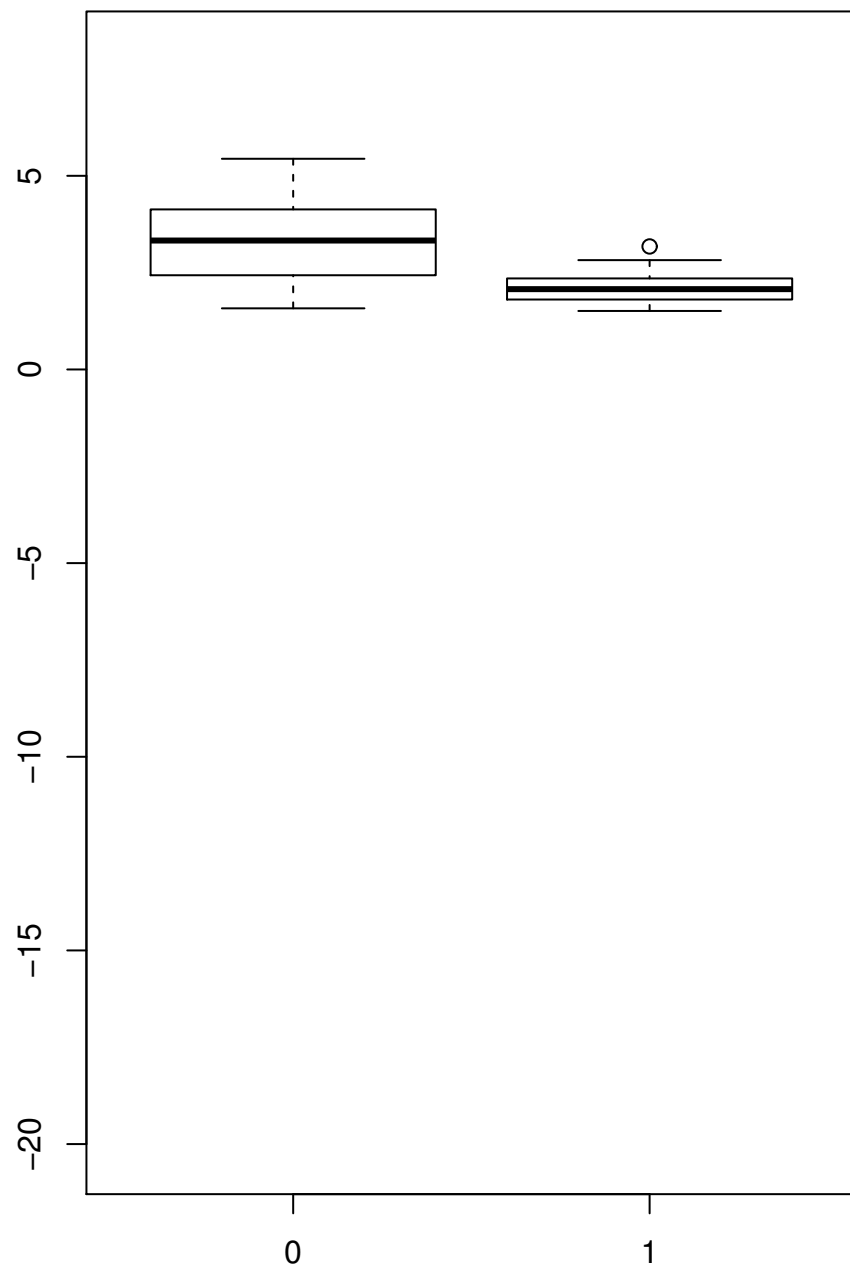

**hsa-miR-143-star**  
**(GSE67139)**

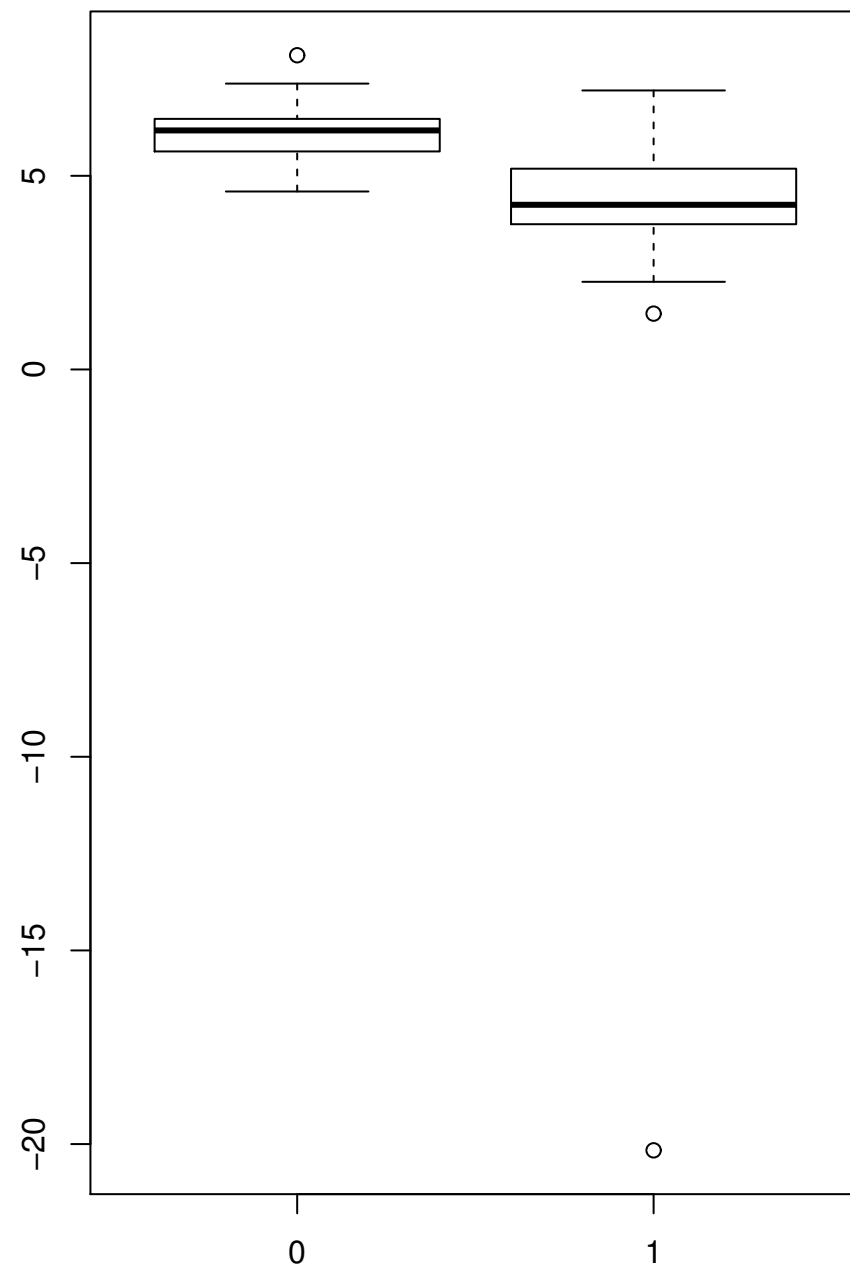

**hsa-miR-146a**  
**(GSE67138)**

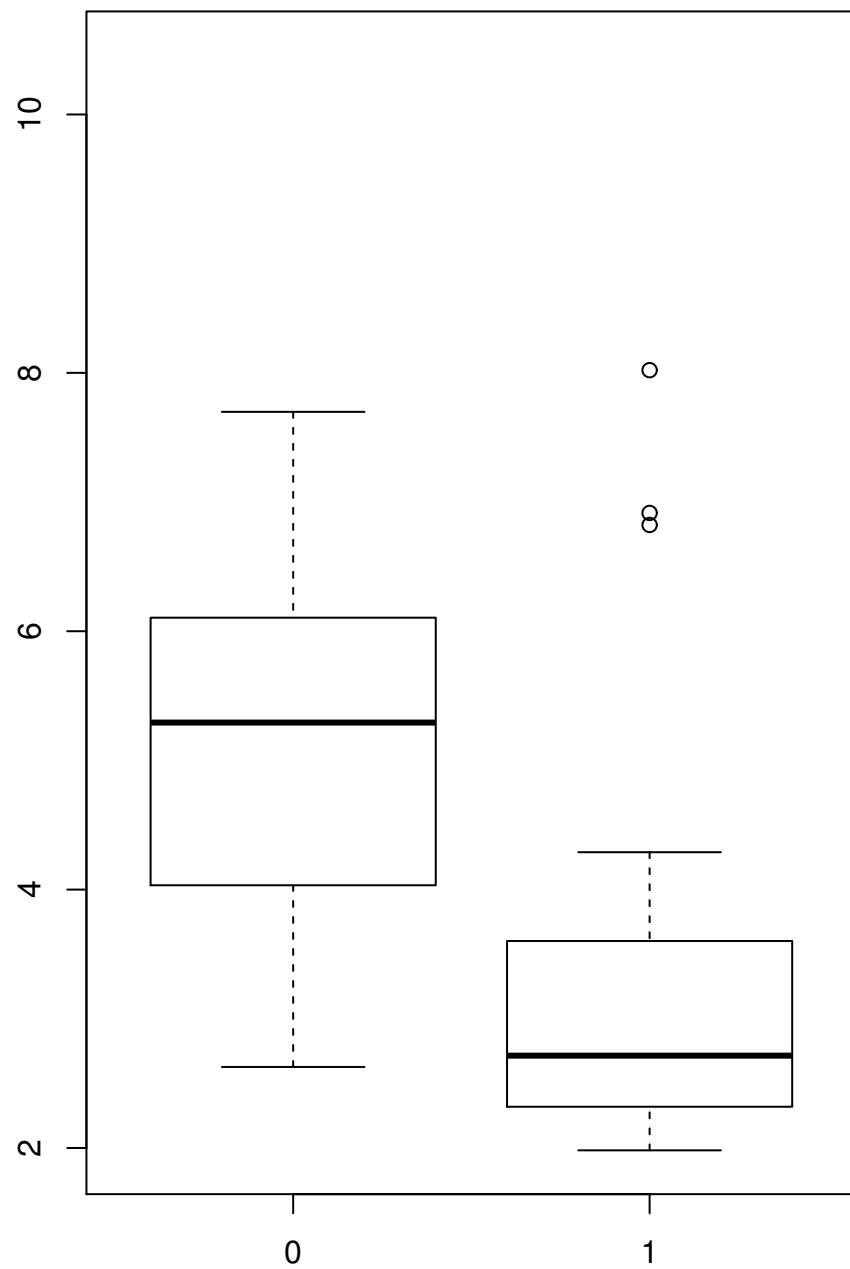

**hsa-miR-146a**  
**(GSE67139)**

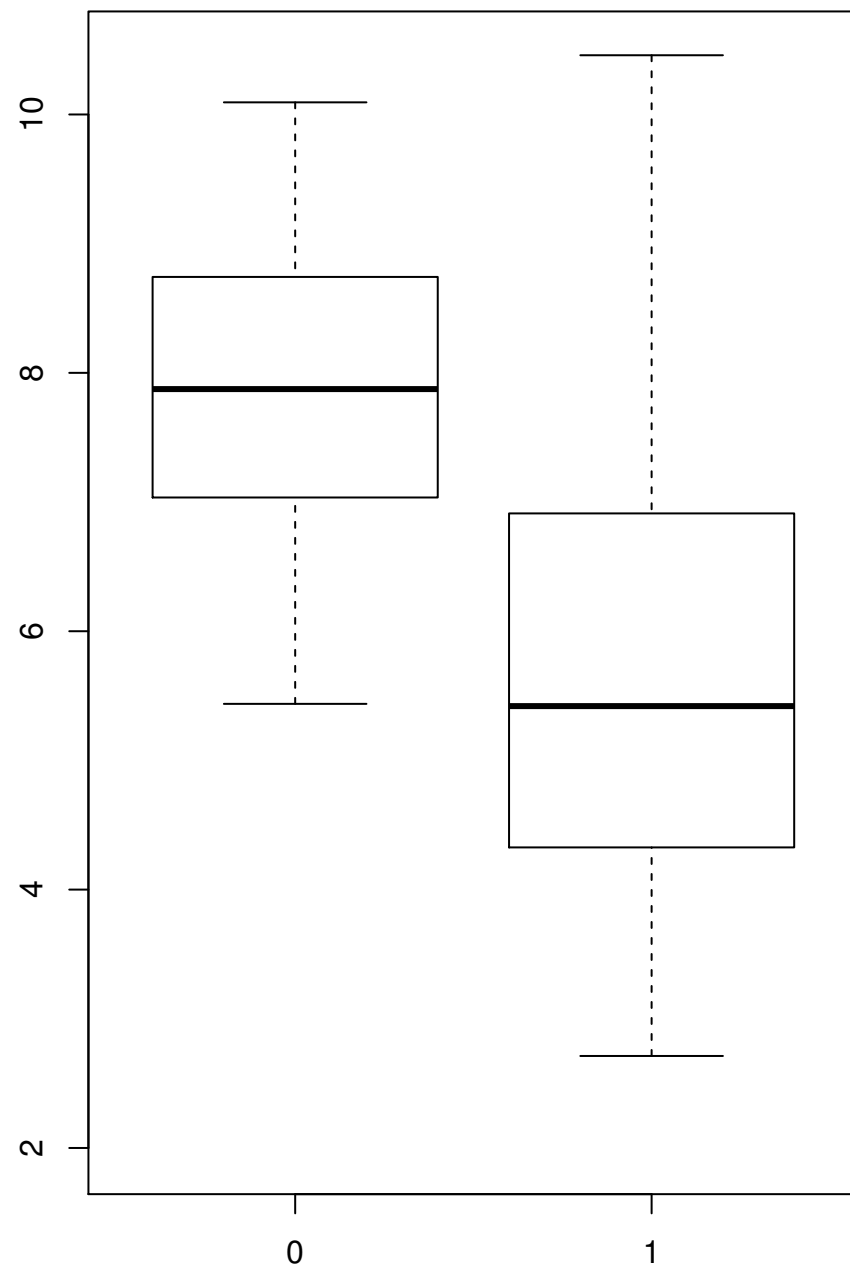

**hsa-miR-146b-3p  
(GSE67138)**

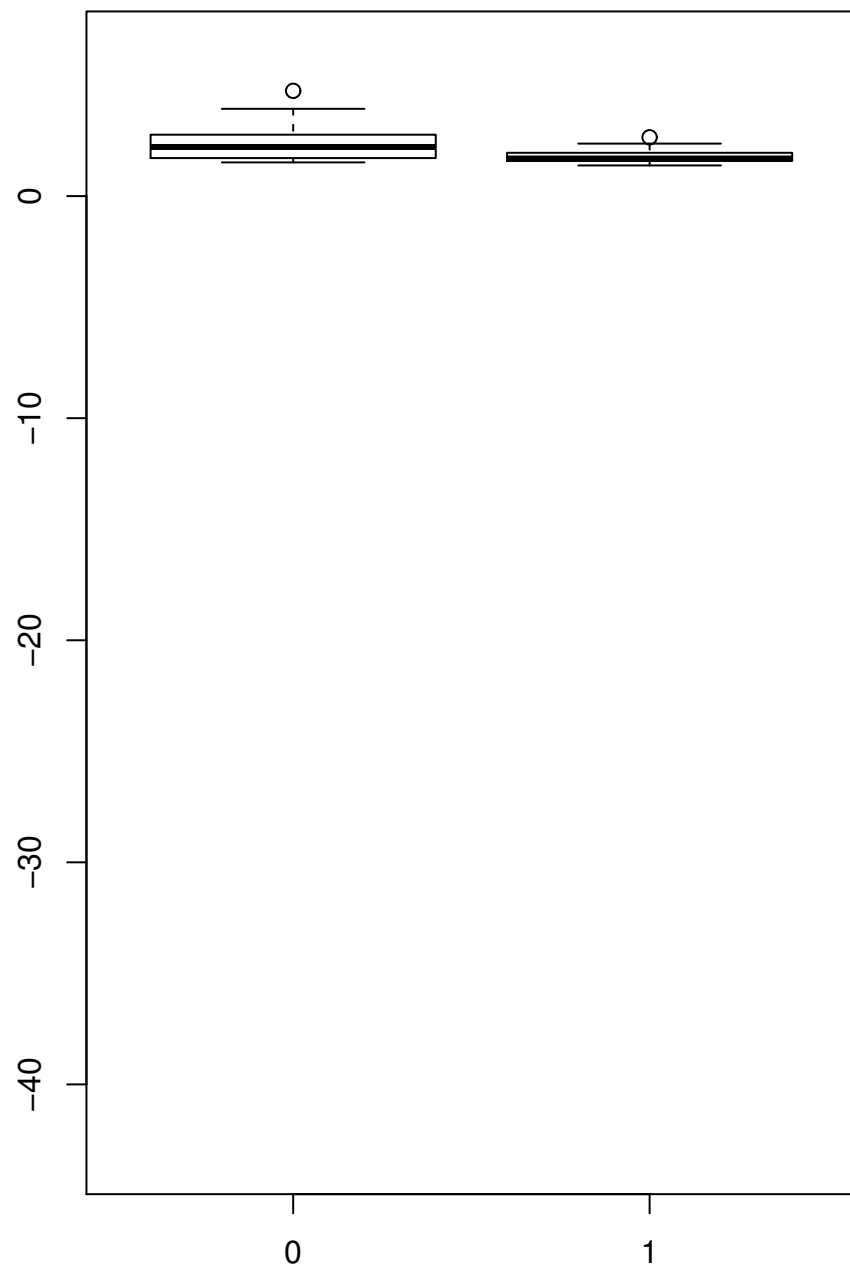

**hsa-miR-146b-3p  
(GSE67139)**

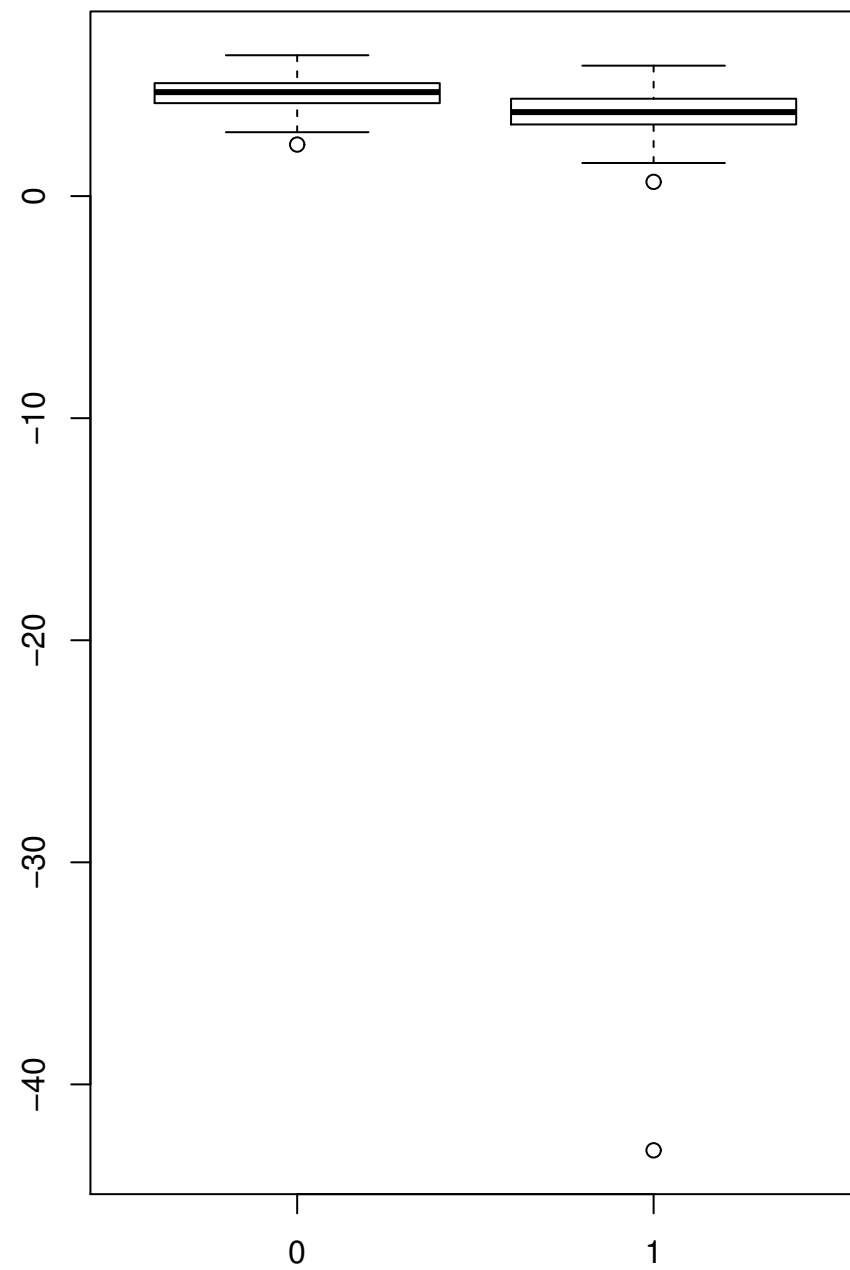

**hsa-miR-146b-5p  
(GSE67138)**

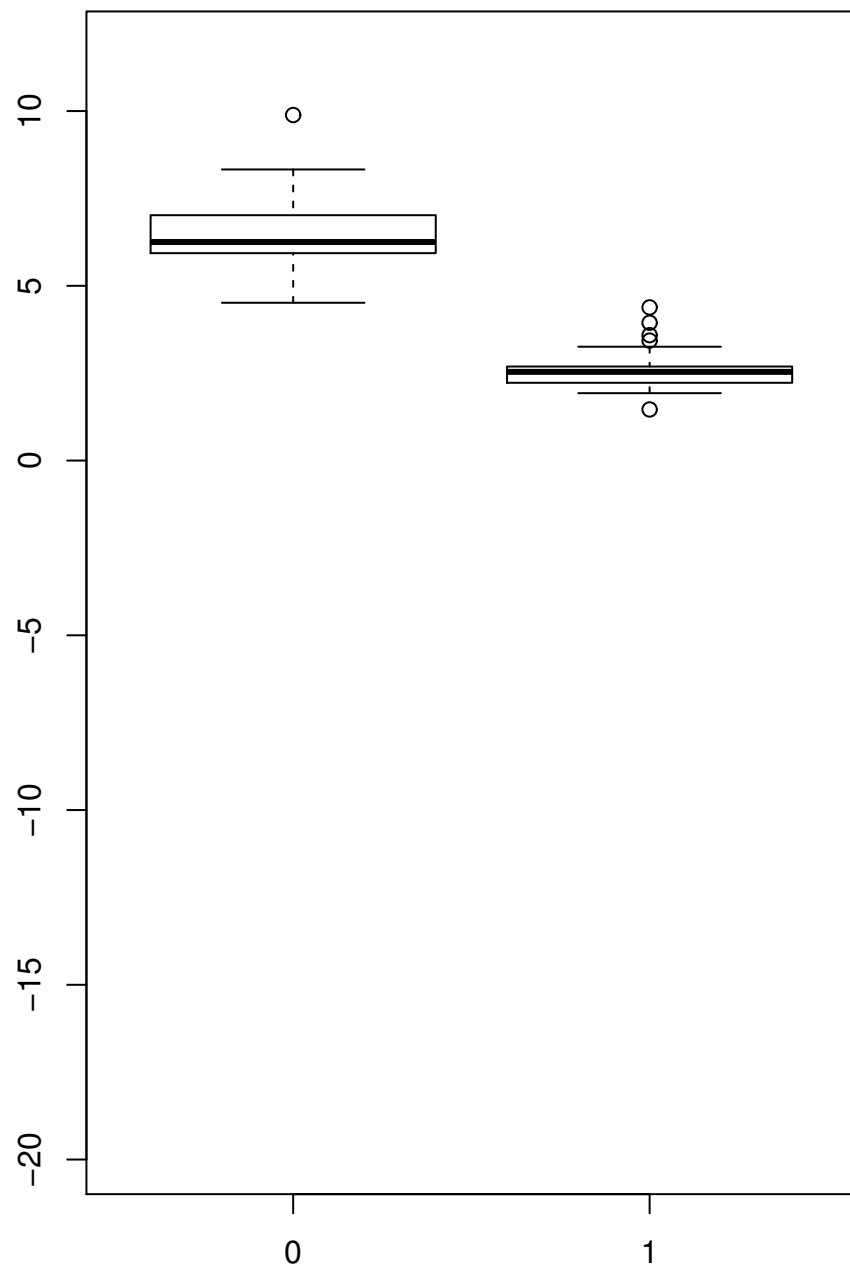

**hsa-miR-146b-5p  
(GSE67139)**

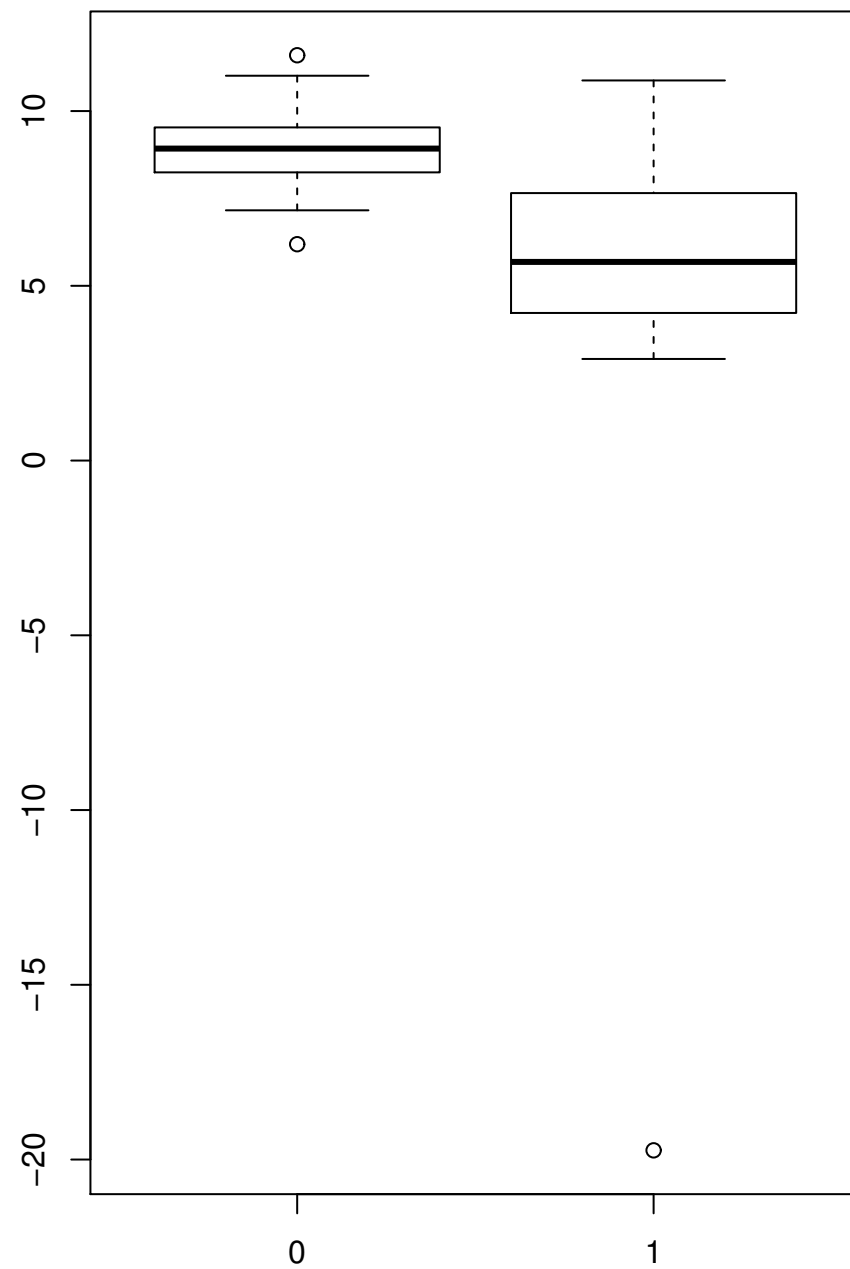



**hsa-miR-148a**  
**(GSE67138)**

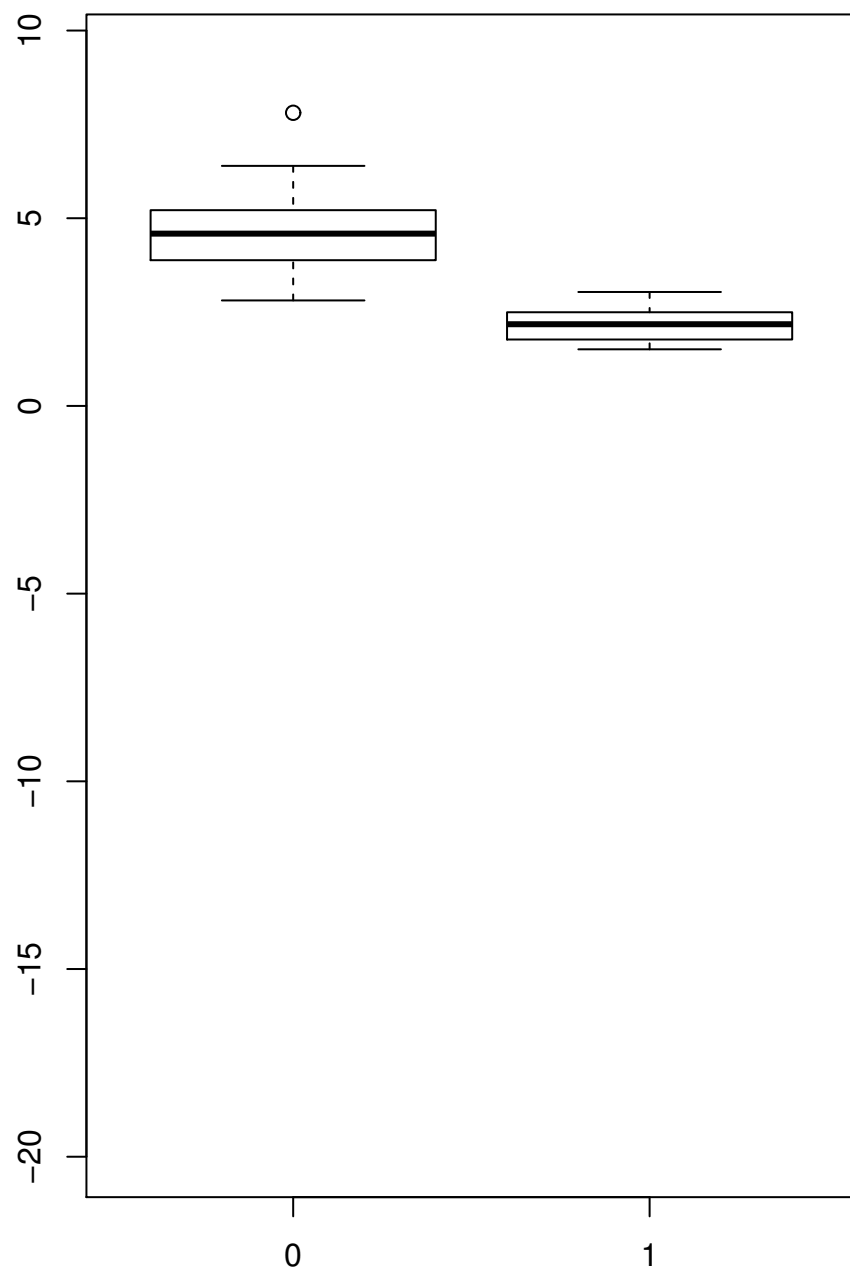

**hsa-miR-148a**  
**(GSE67139)**

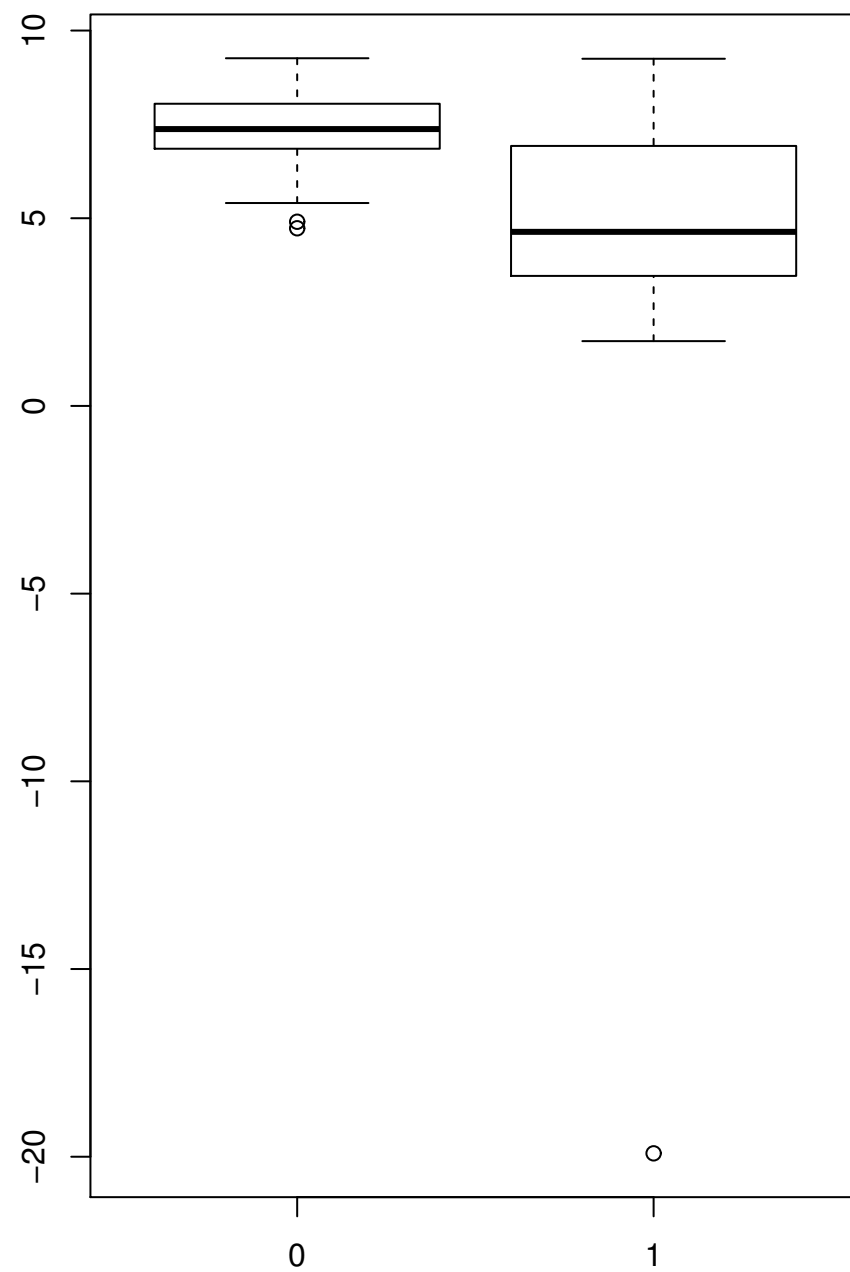

**hsa-miR-148b**  
**(GSE67138)**

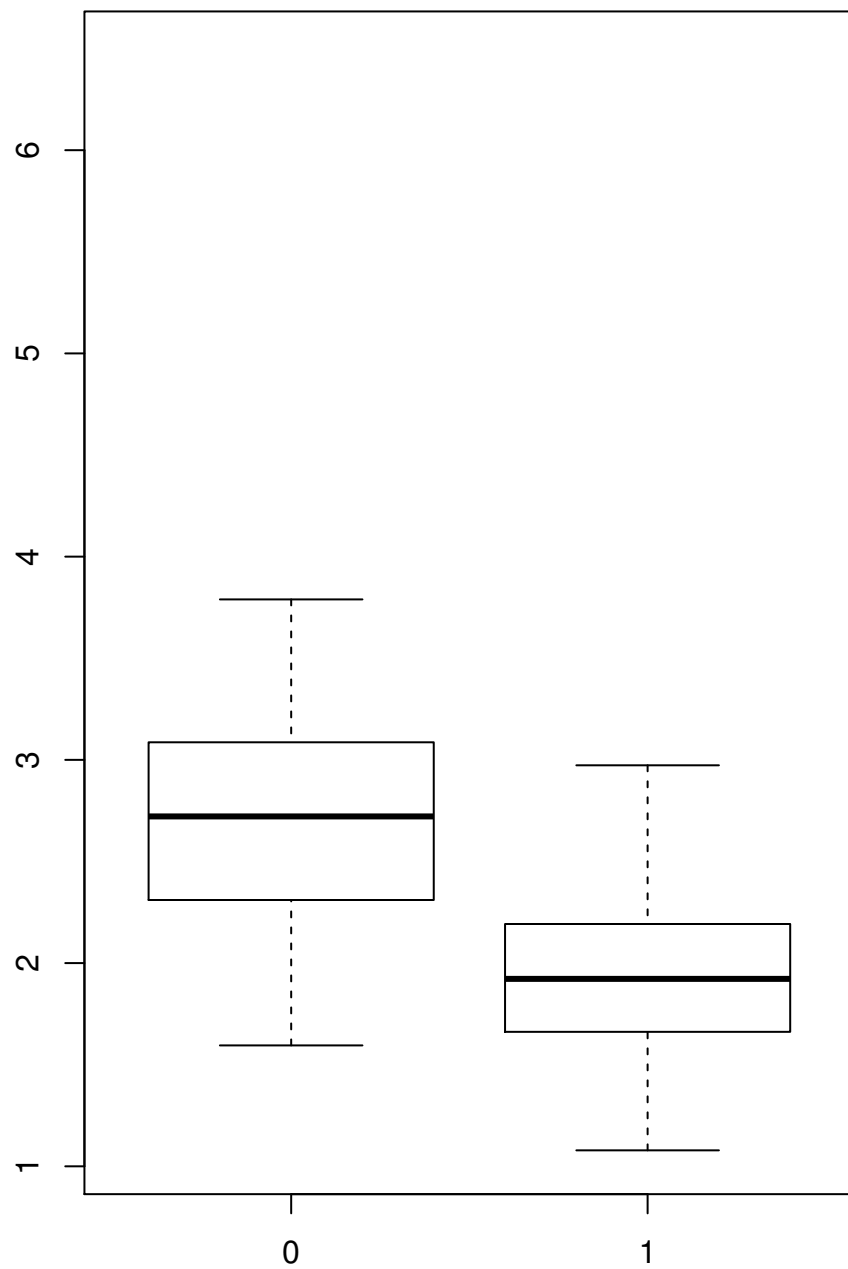

**hsa-miR-148b**  
**(GSE67139)**

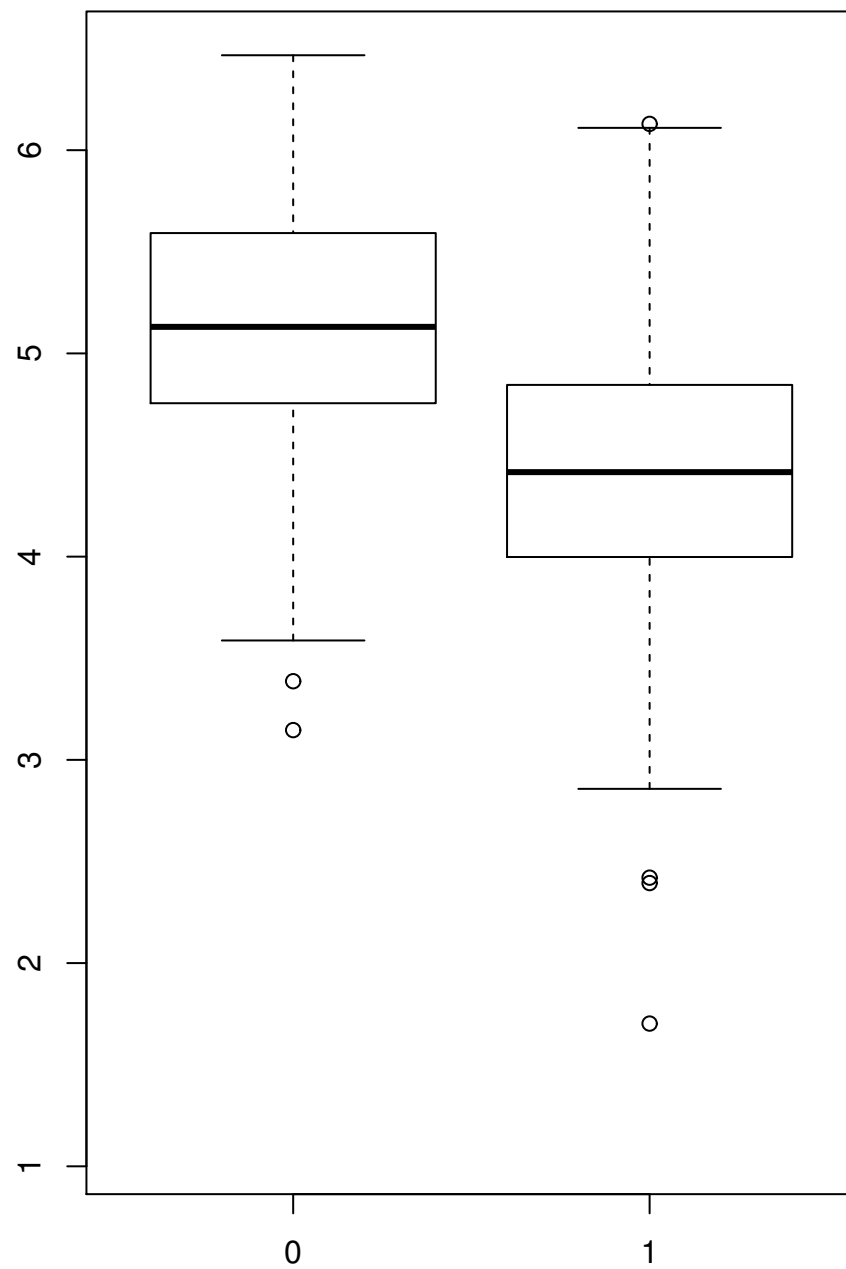

**hsa-miR-149-star**  
**(GSE67138)**

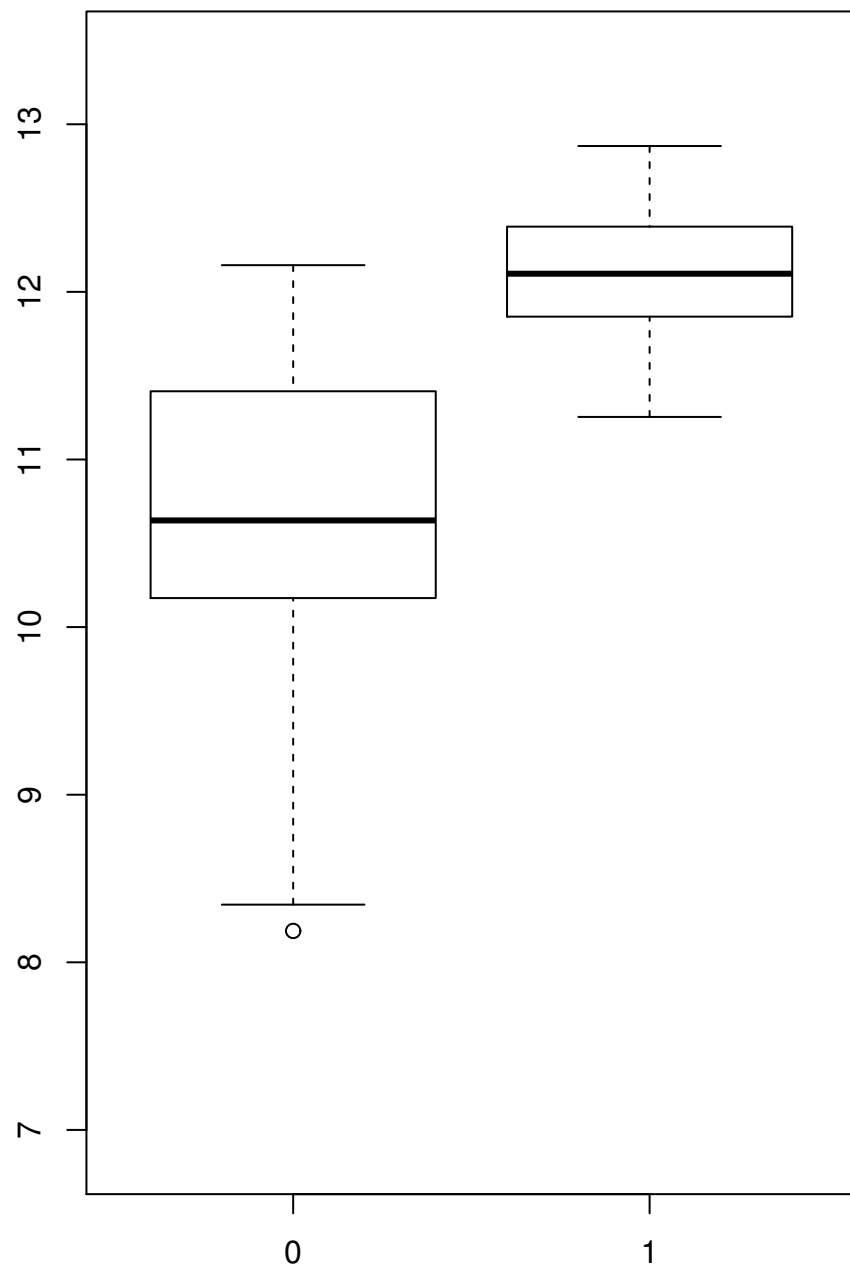

**hsa-miR-149-star**  
**(GSE67139)**

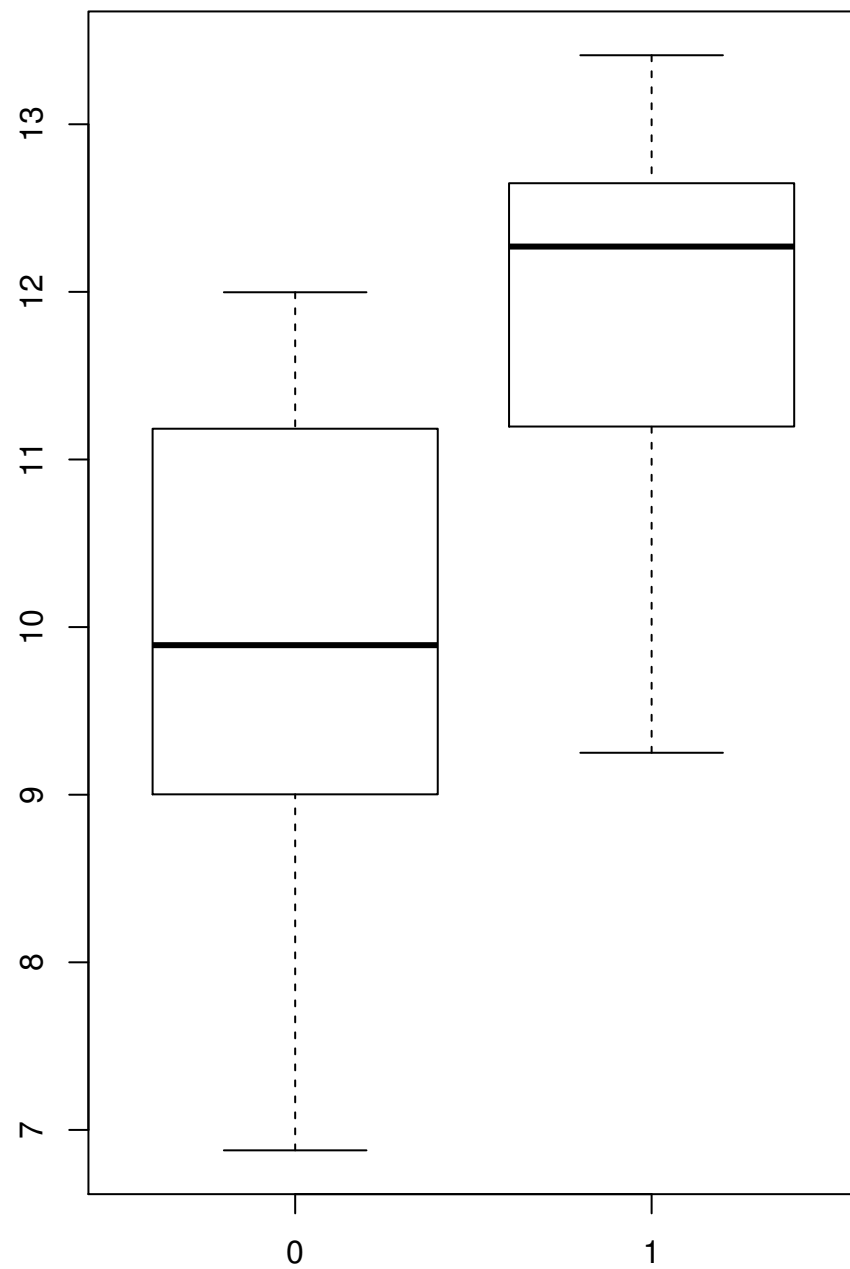

**hsa-miR-152  
(GSE67138)**

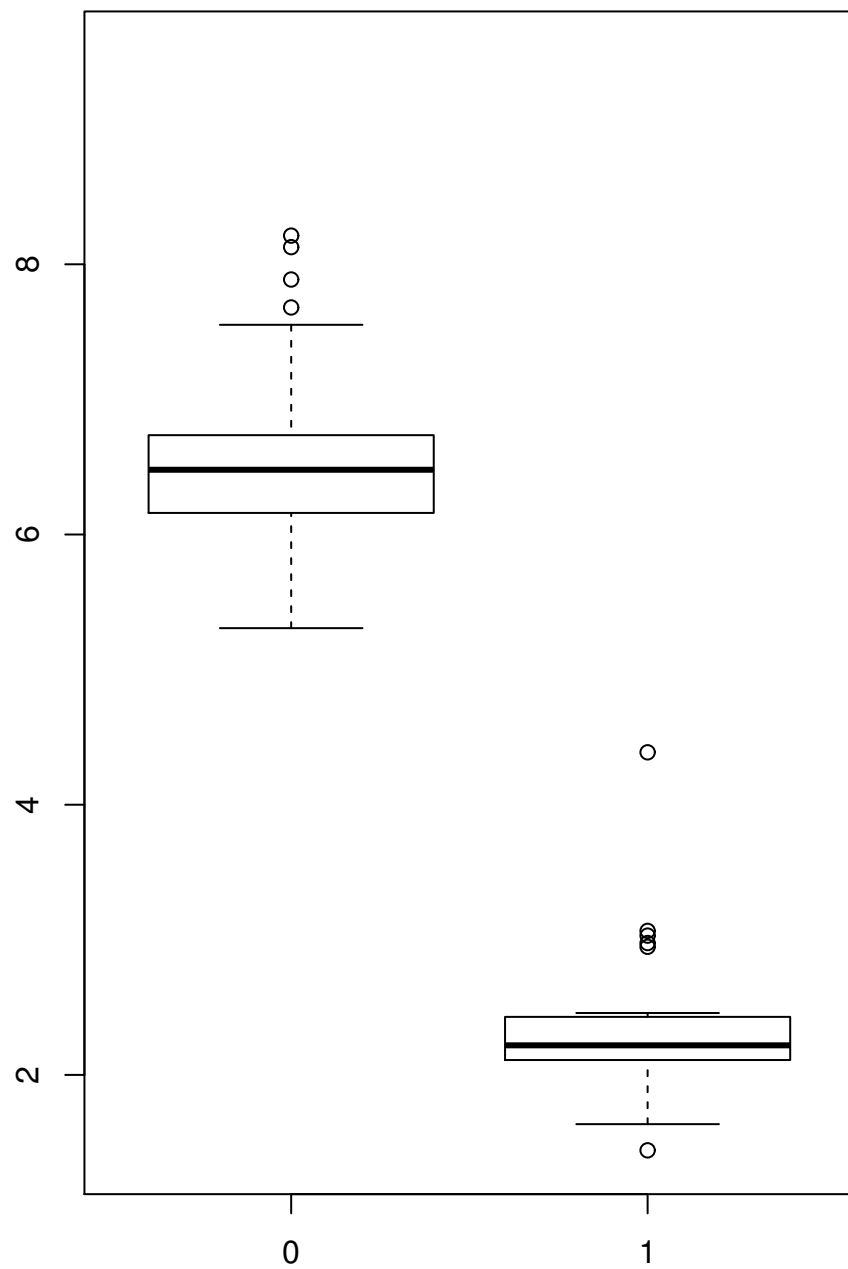

**hsa-miR-152  
(GSE67139)**

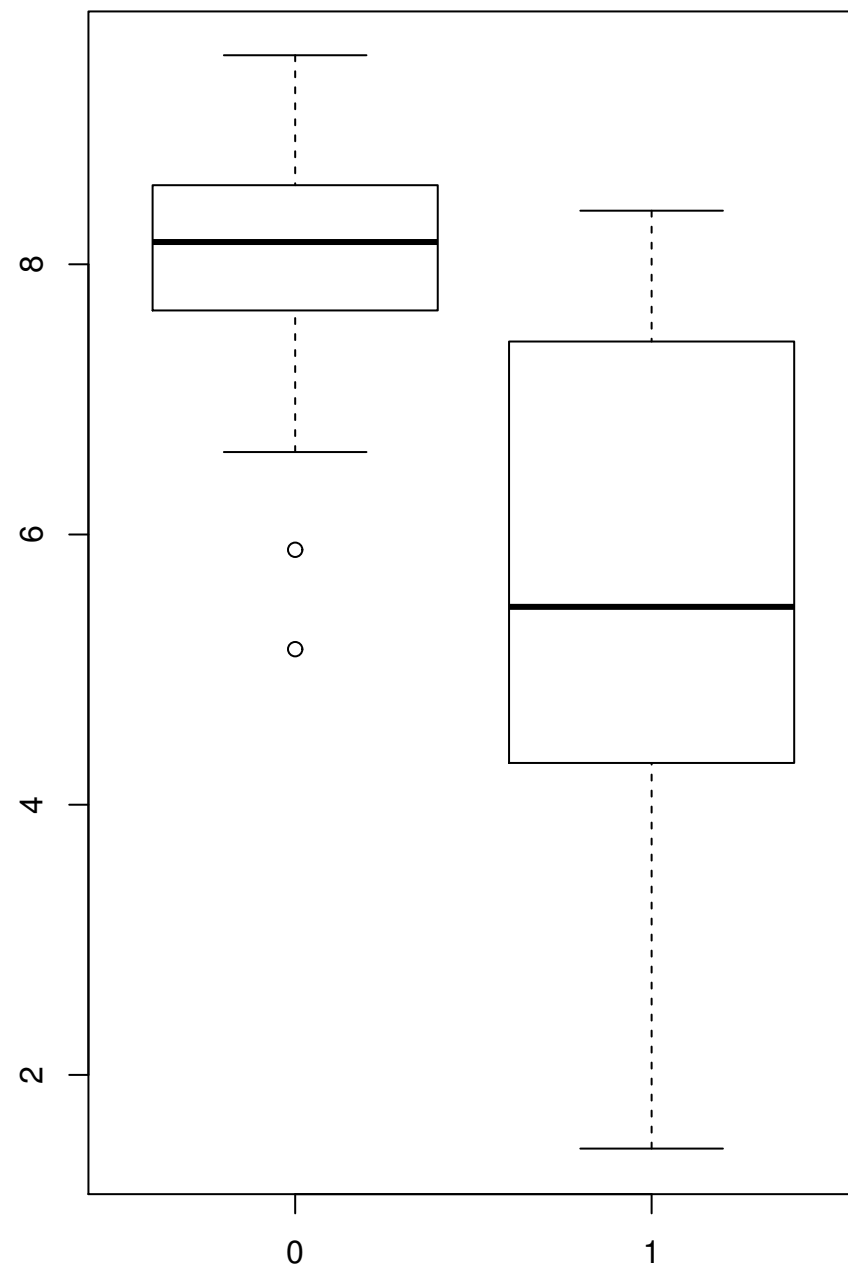

**hsa-miR-15a  
(GSE67138)**

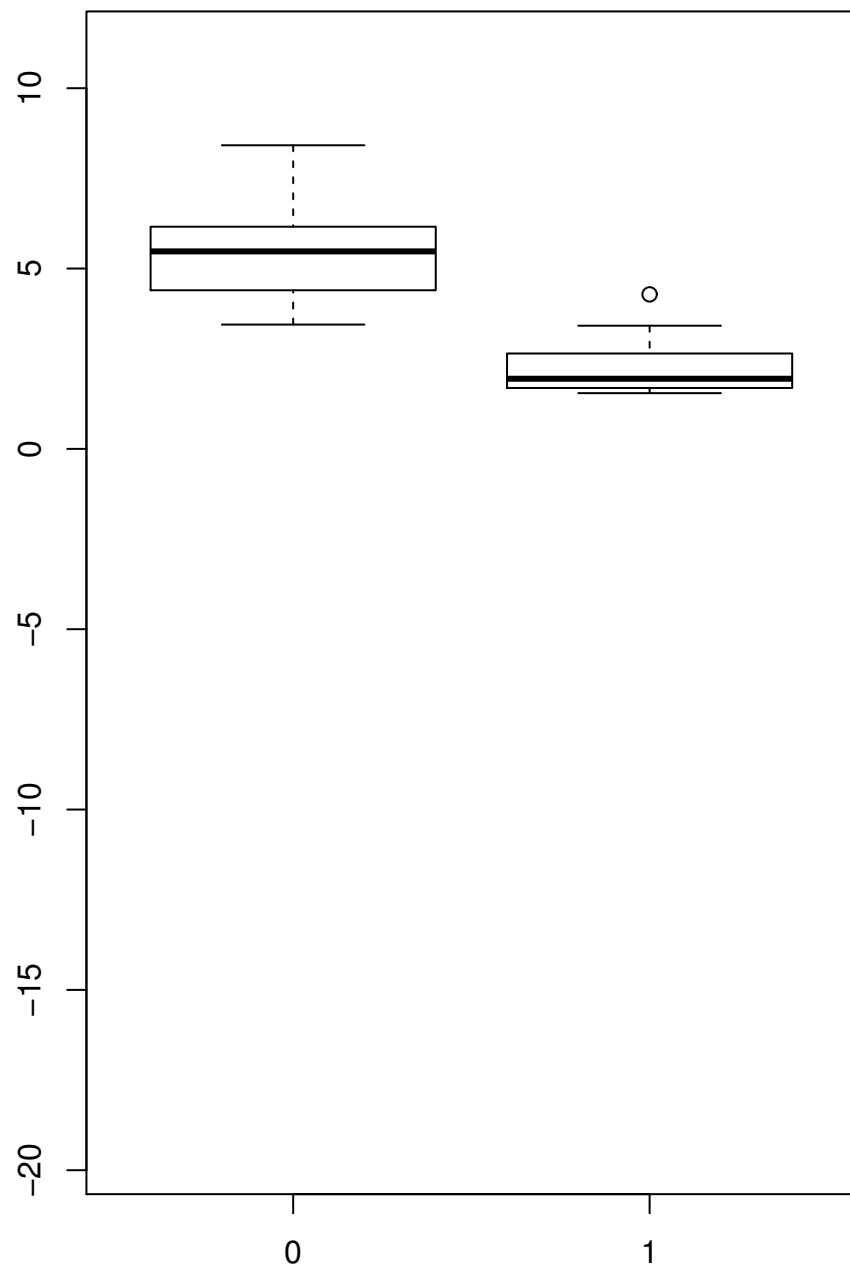

**hsa-miR-15a  
(GSE67139)**

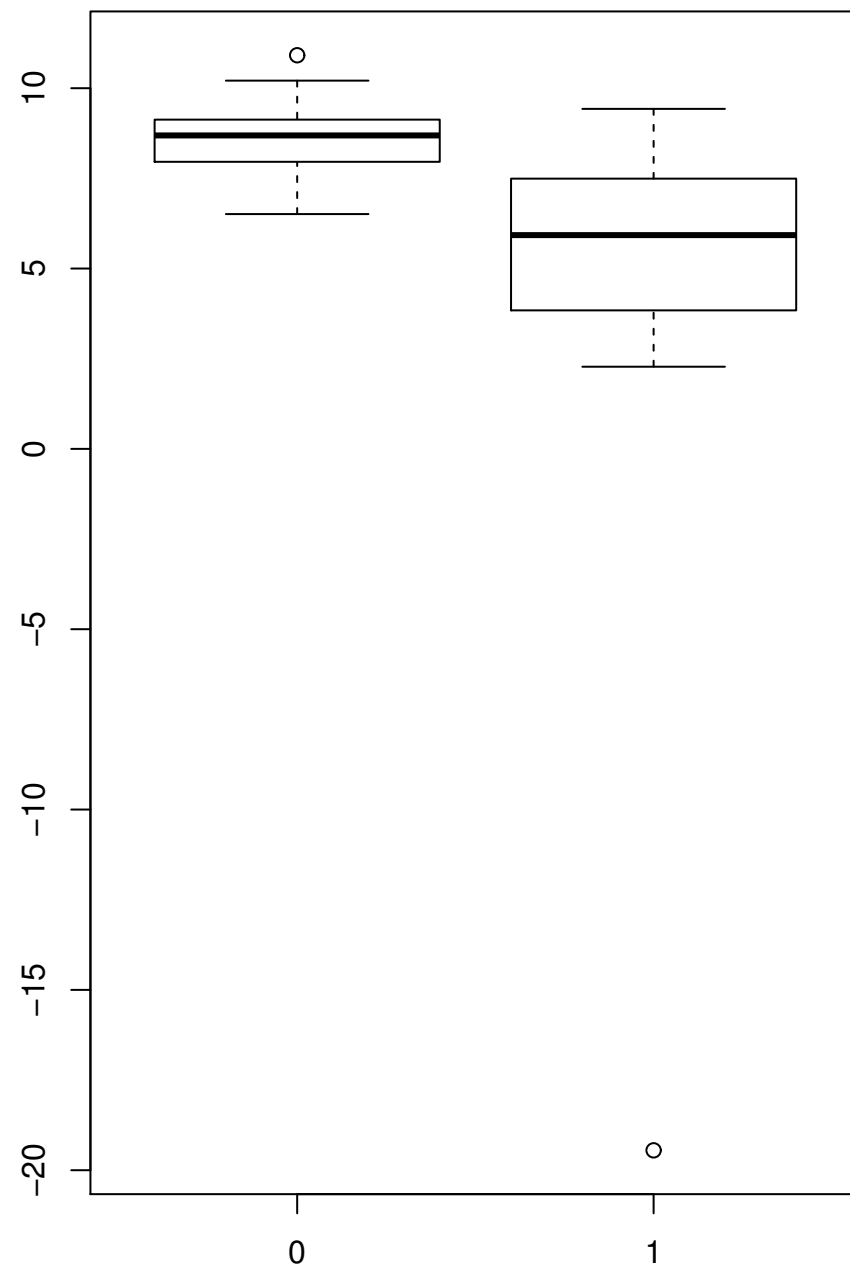

**hsa-miR-16  
(GSE67138)**

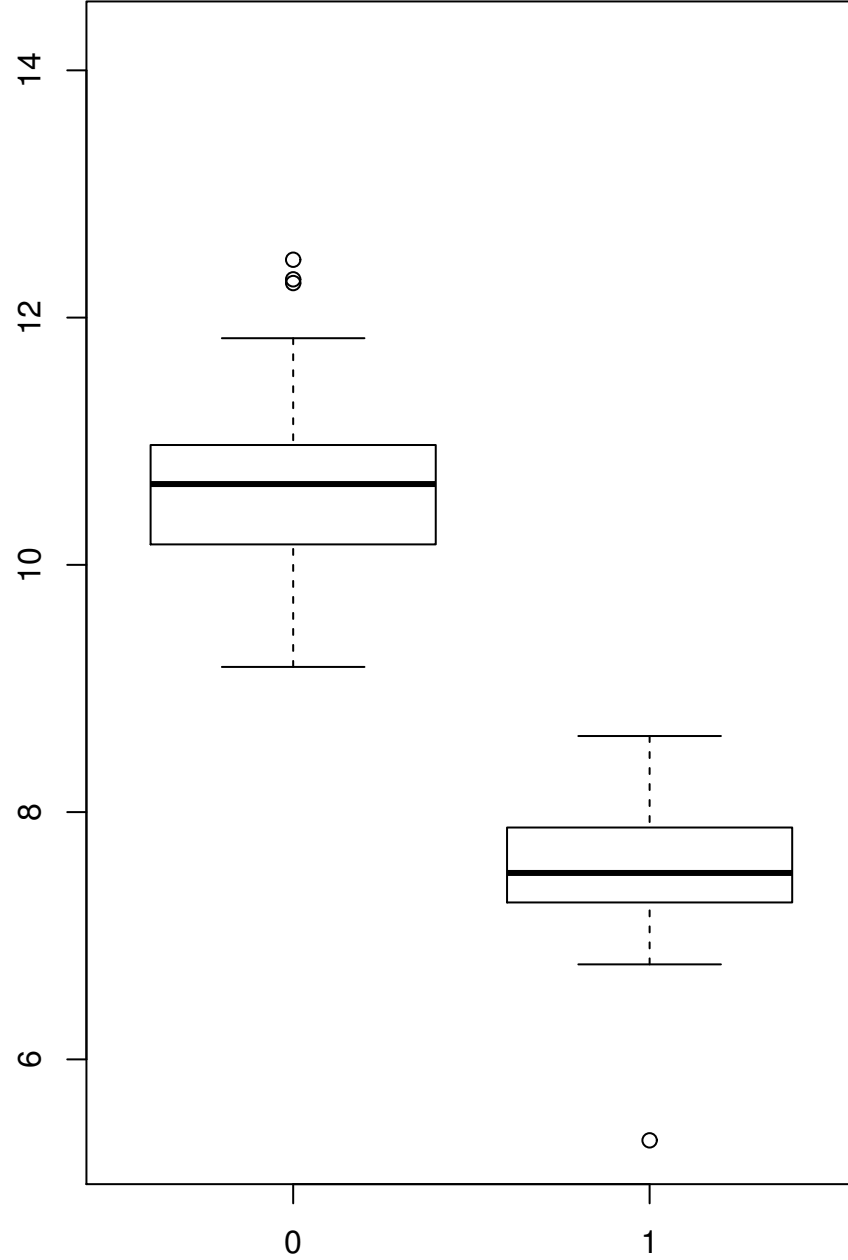

**hsa-miR-16  
(GSE67139)**

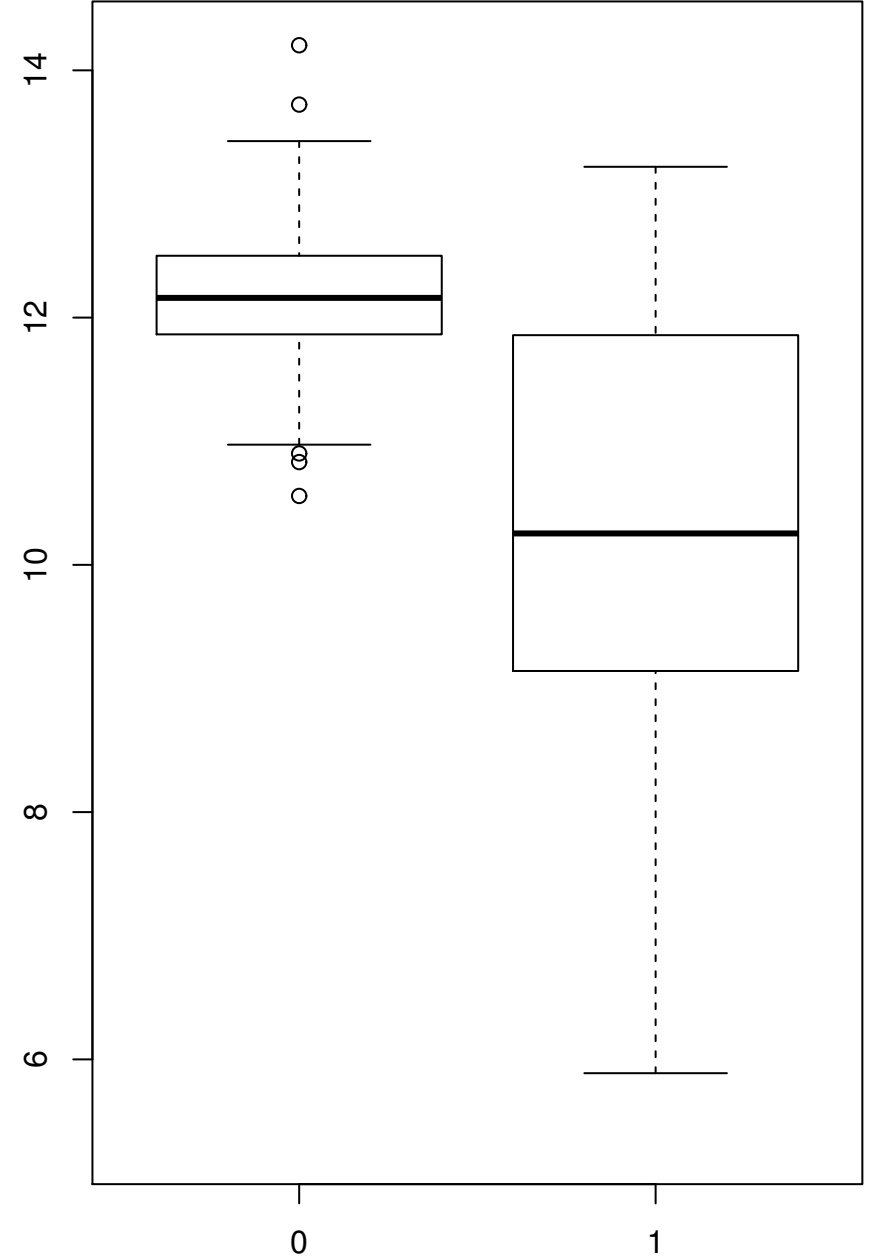

**hsa-miR-17-star  
(GSE67138)**

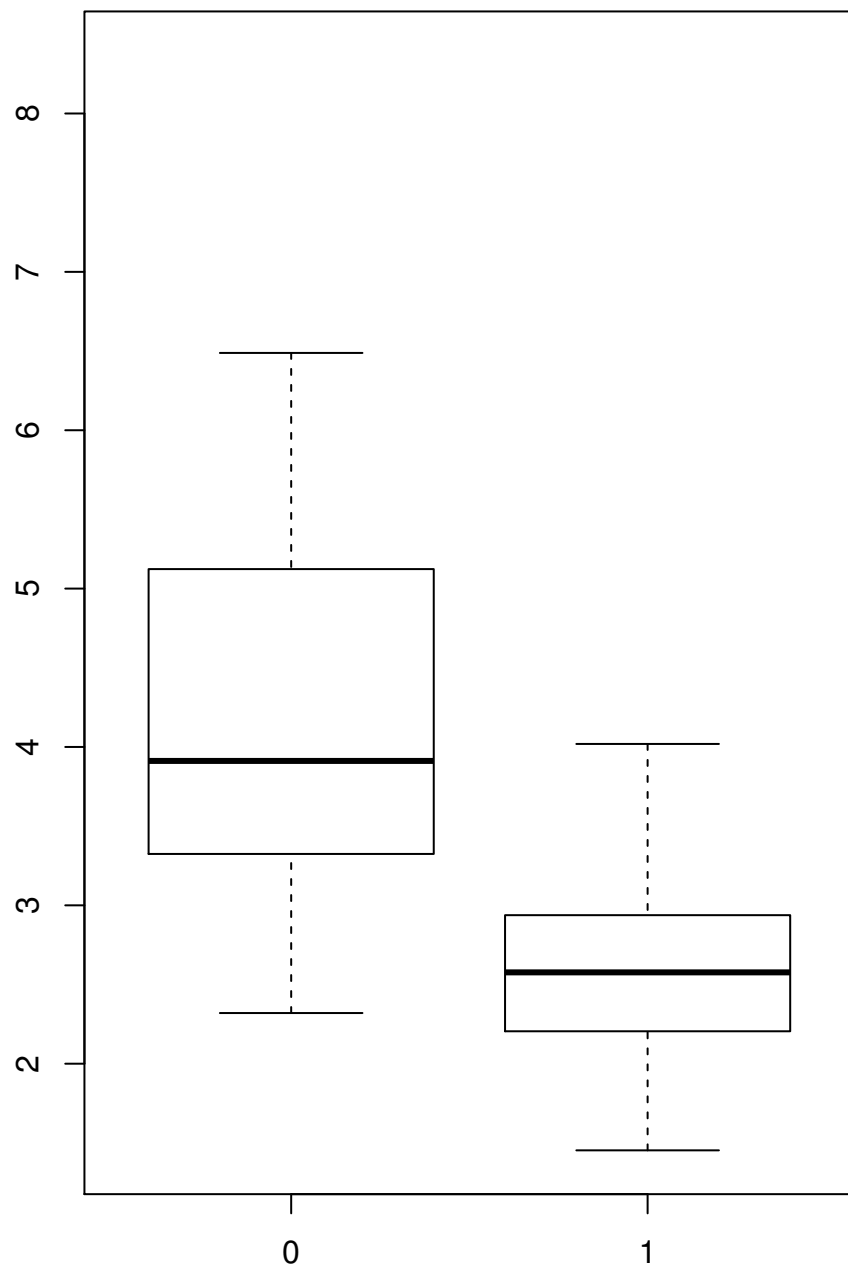

**hsa-miR-17-star  
(GSE67139)**

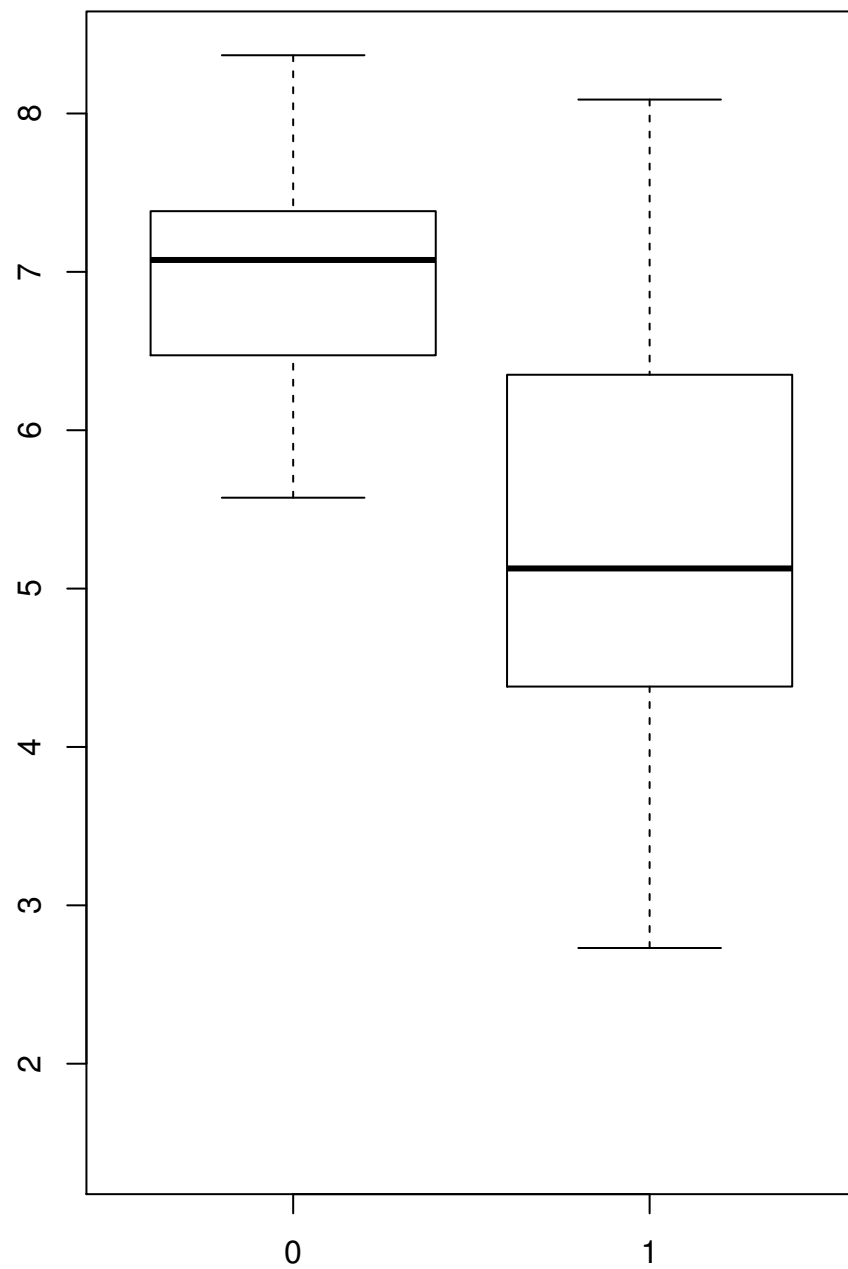

**hsa-miR-181a-2-star  
(GSE67138)**

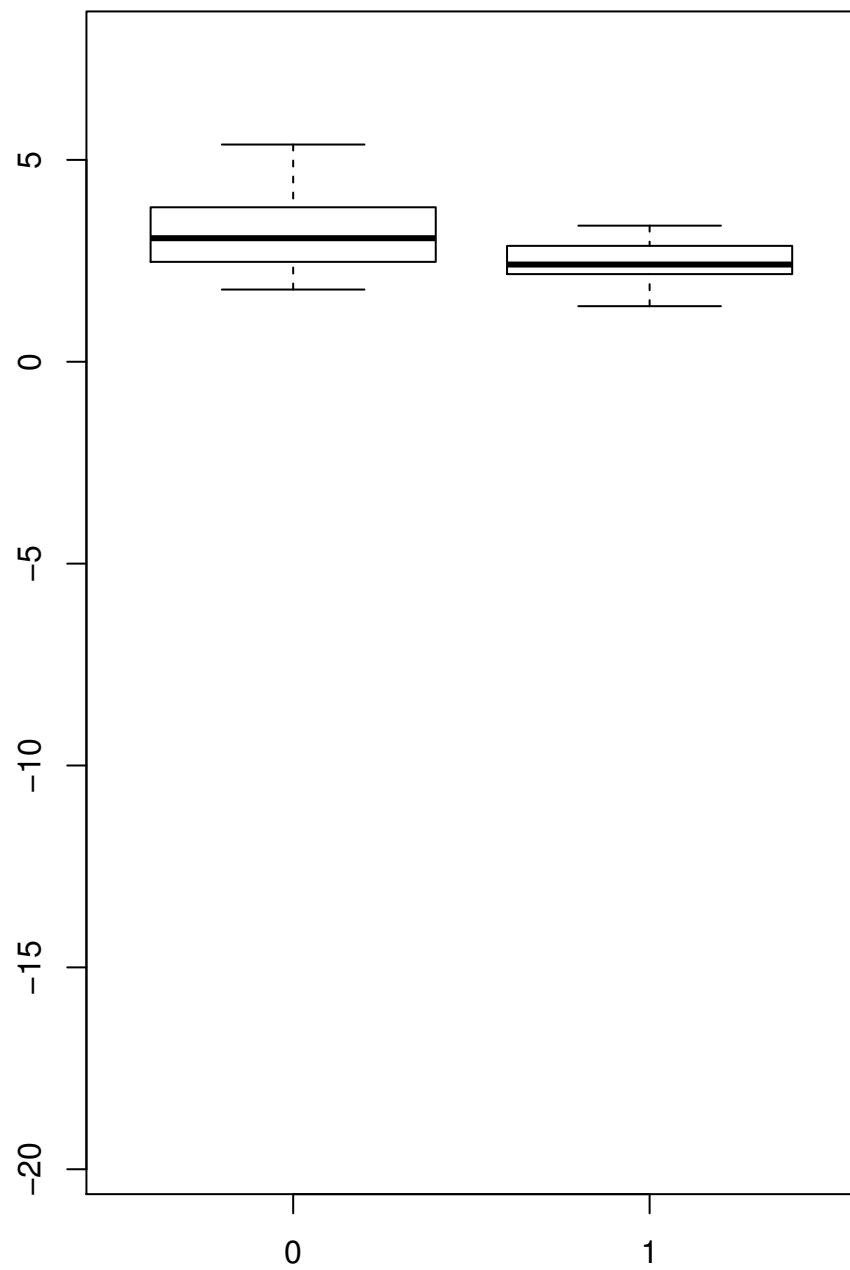

**hsa-miR-181a-2-star  
(GSE67139)**

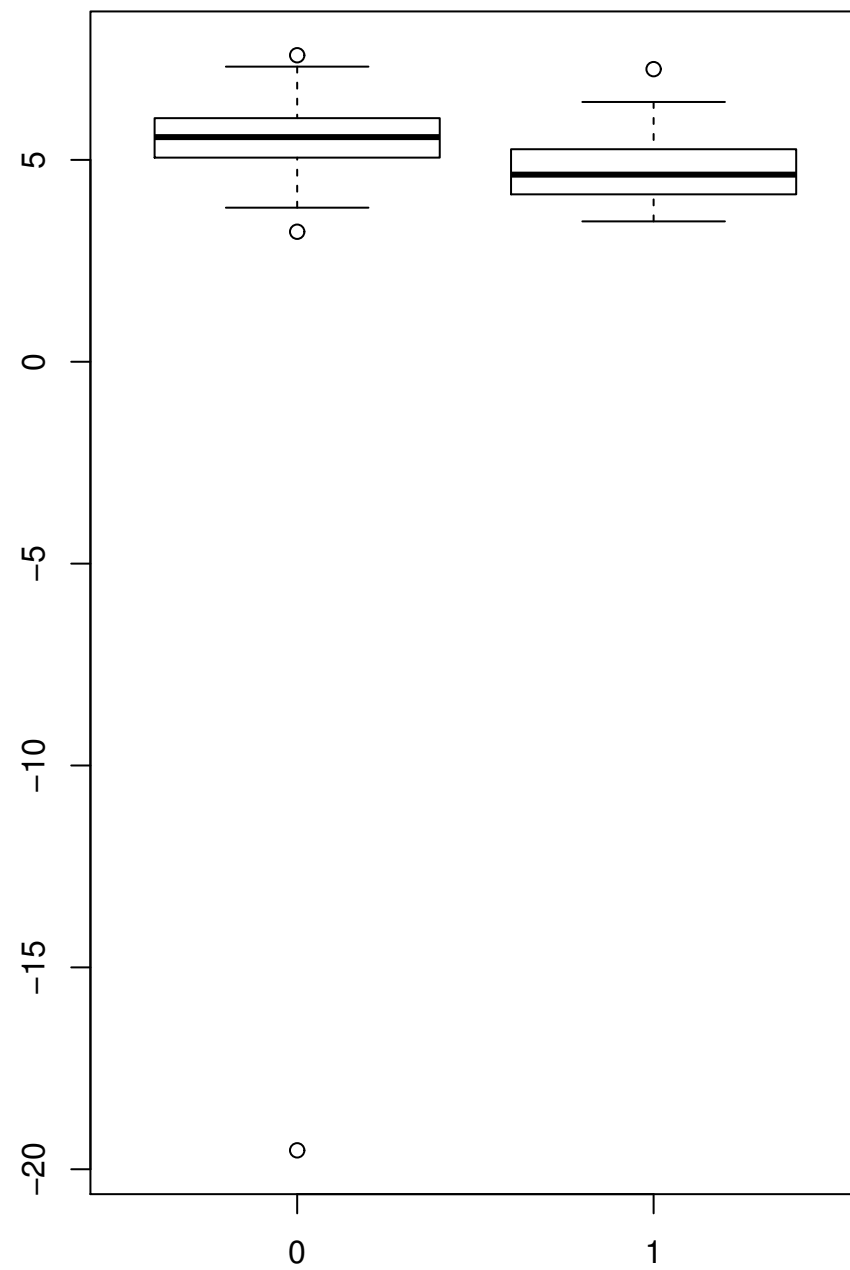



**hsa-miR-181c**  
**(GSE67138)**

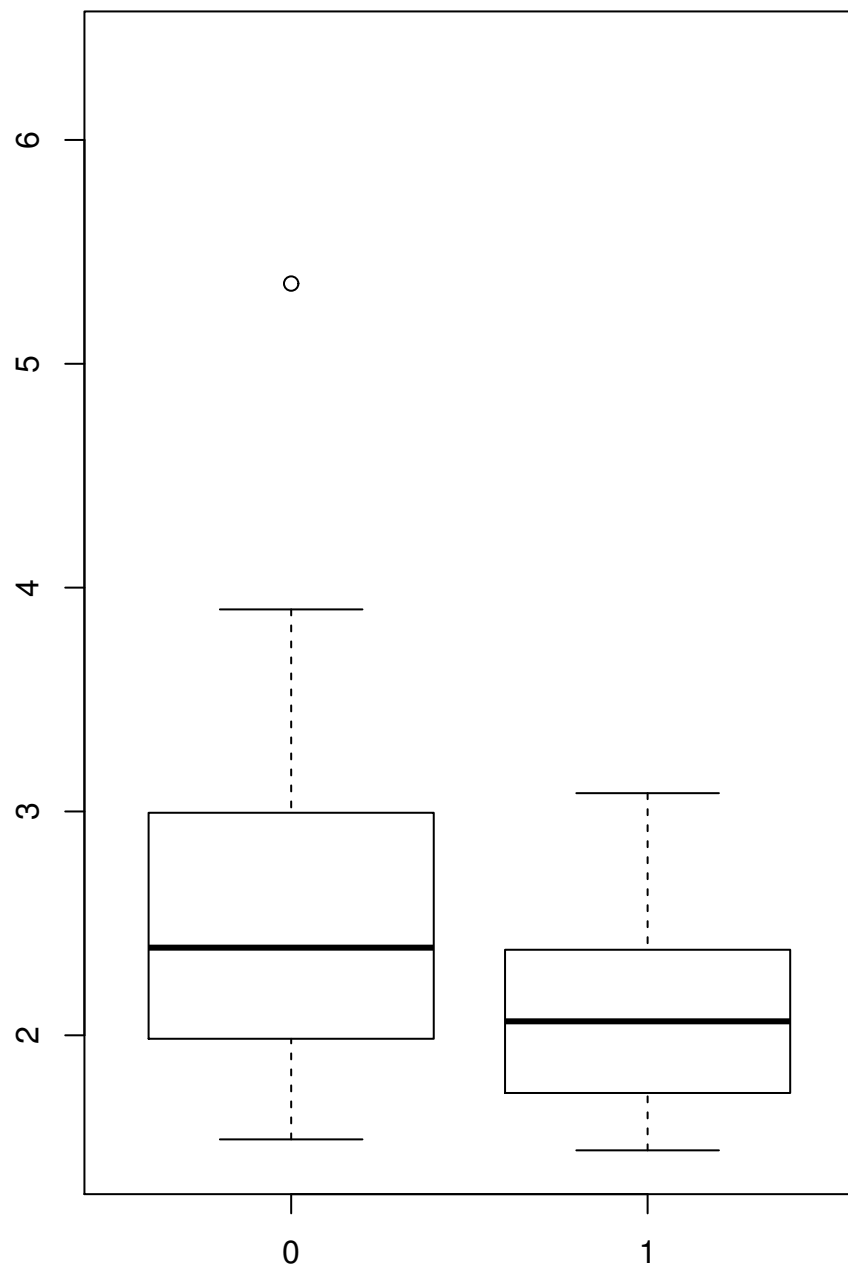

**hsa-miR-181c**  
**(GSE67139)**

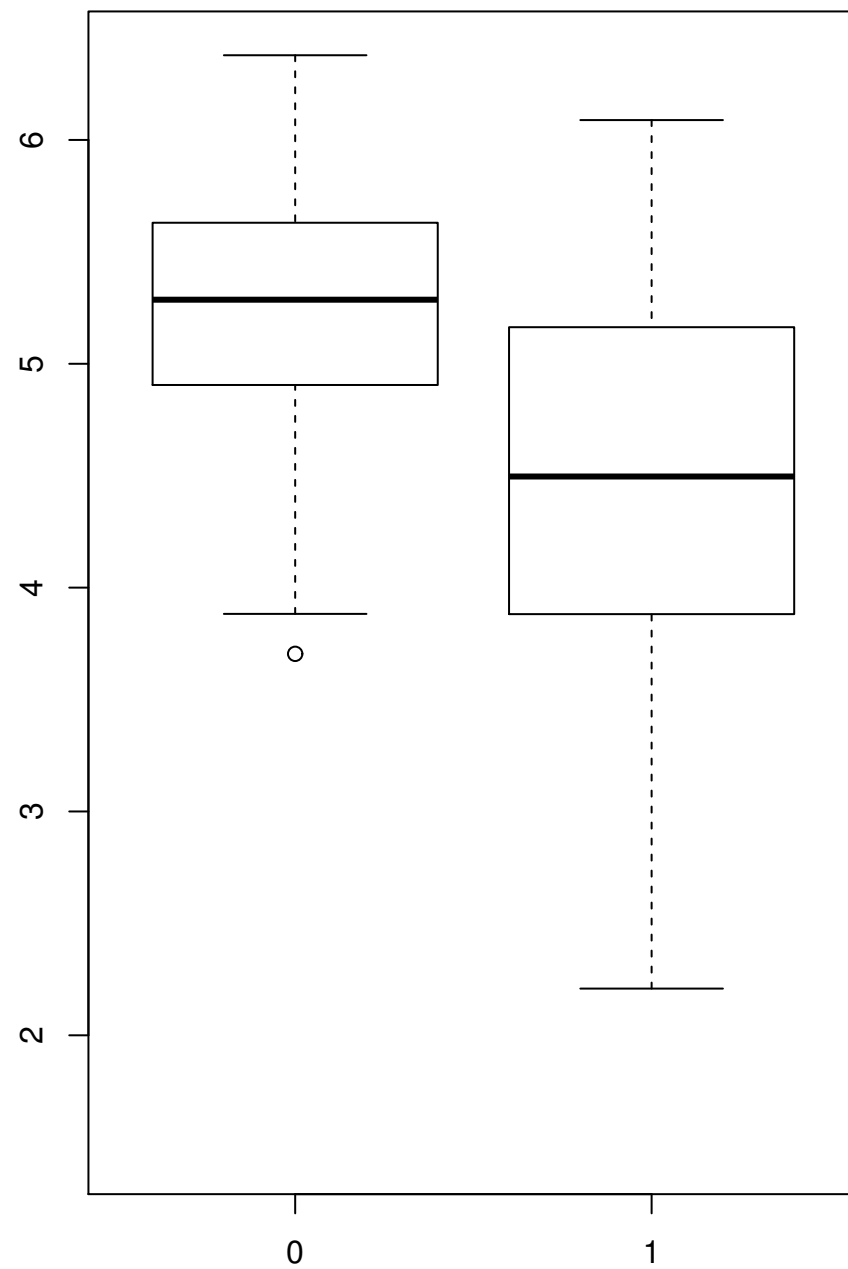

**hsa-miR-1825**  
**(GSE67138)**

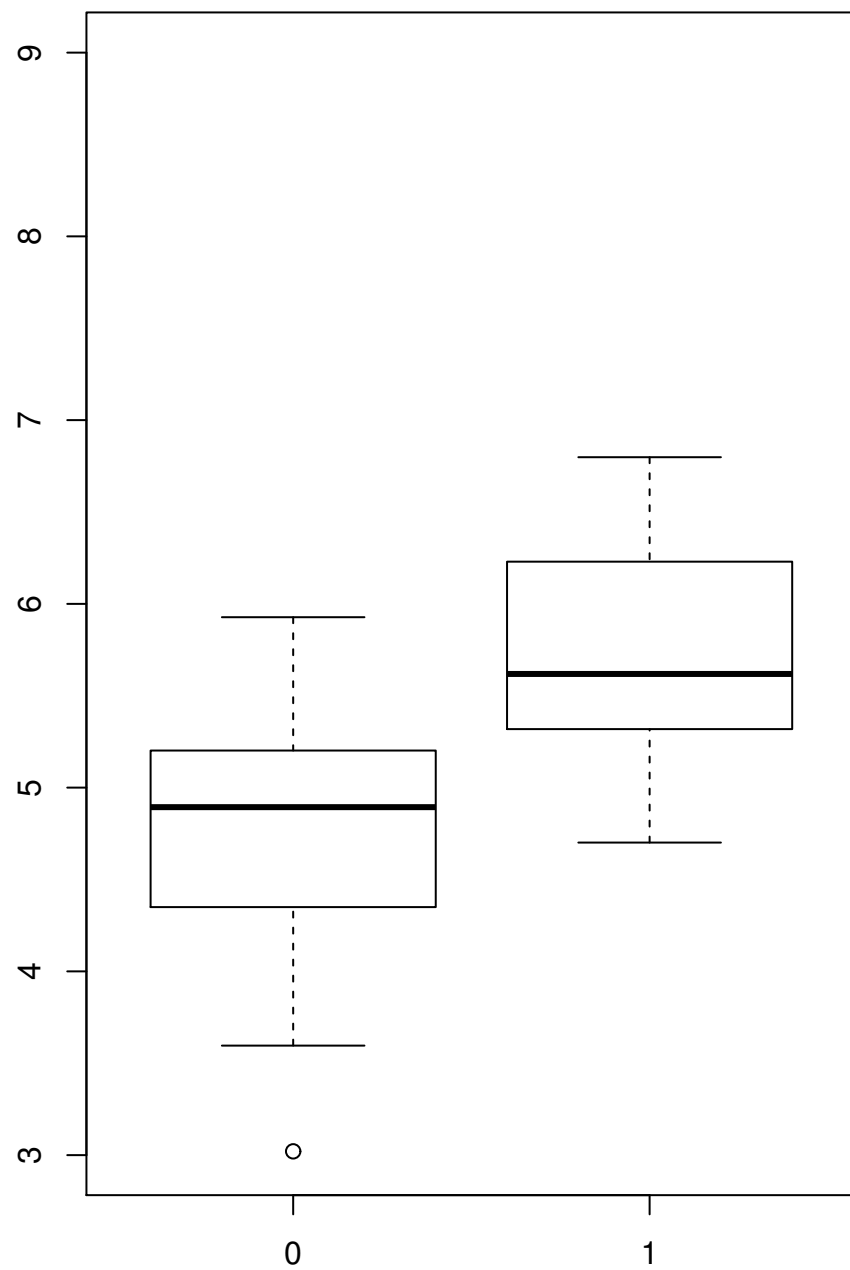

**hsa-miR-1825**  
**(GSE67139)**

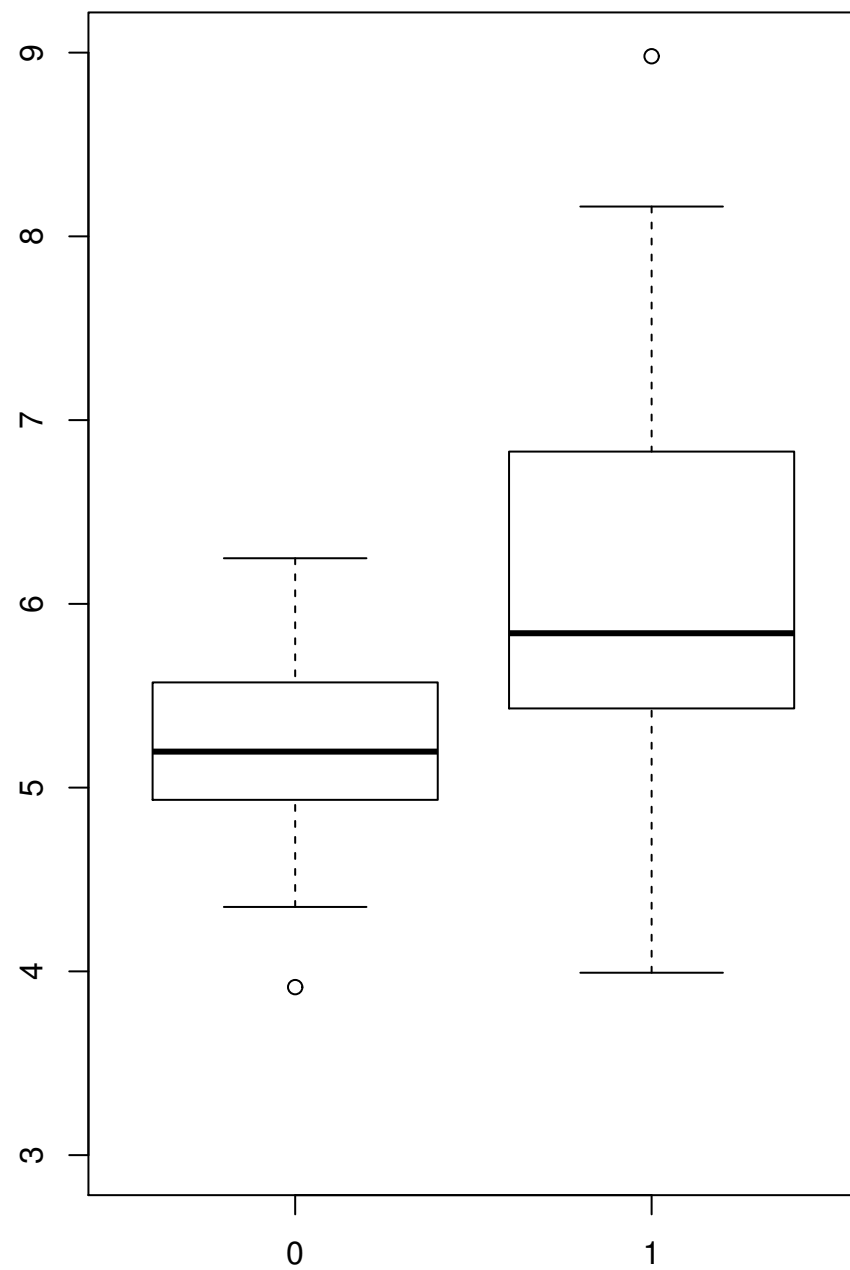

**hsa-miR-1827  
(GSE67138)**

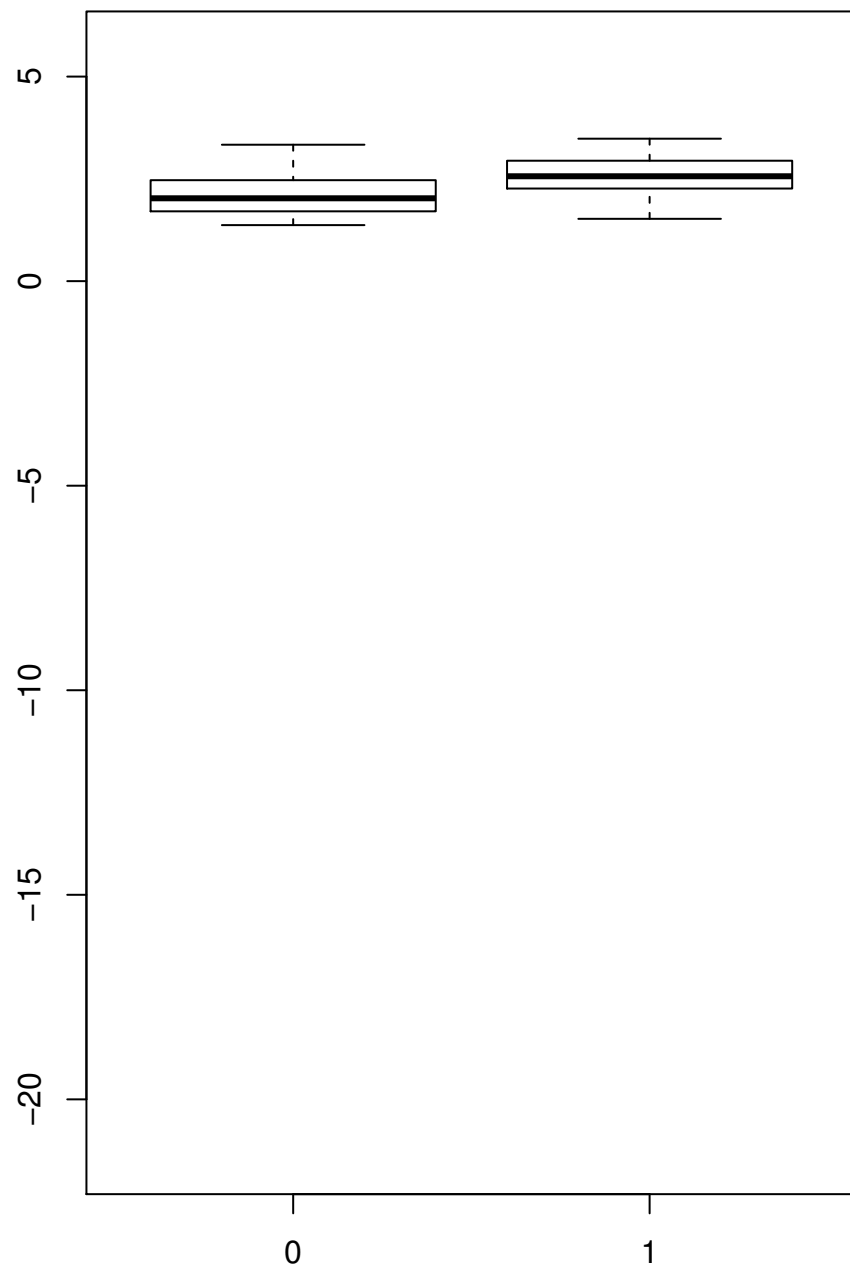

**hsa-miR-1827  
(GSE67139)**

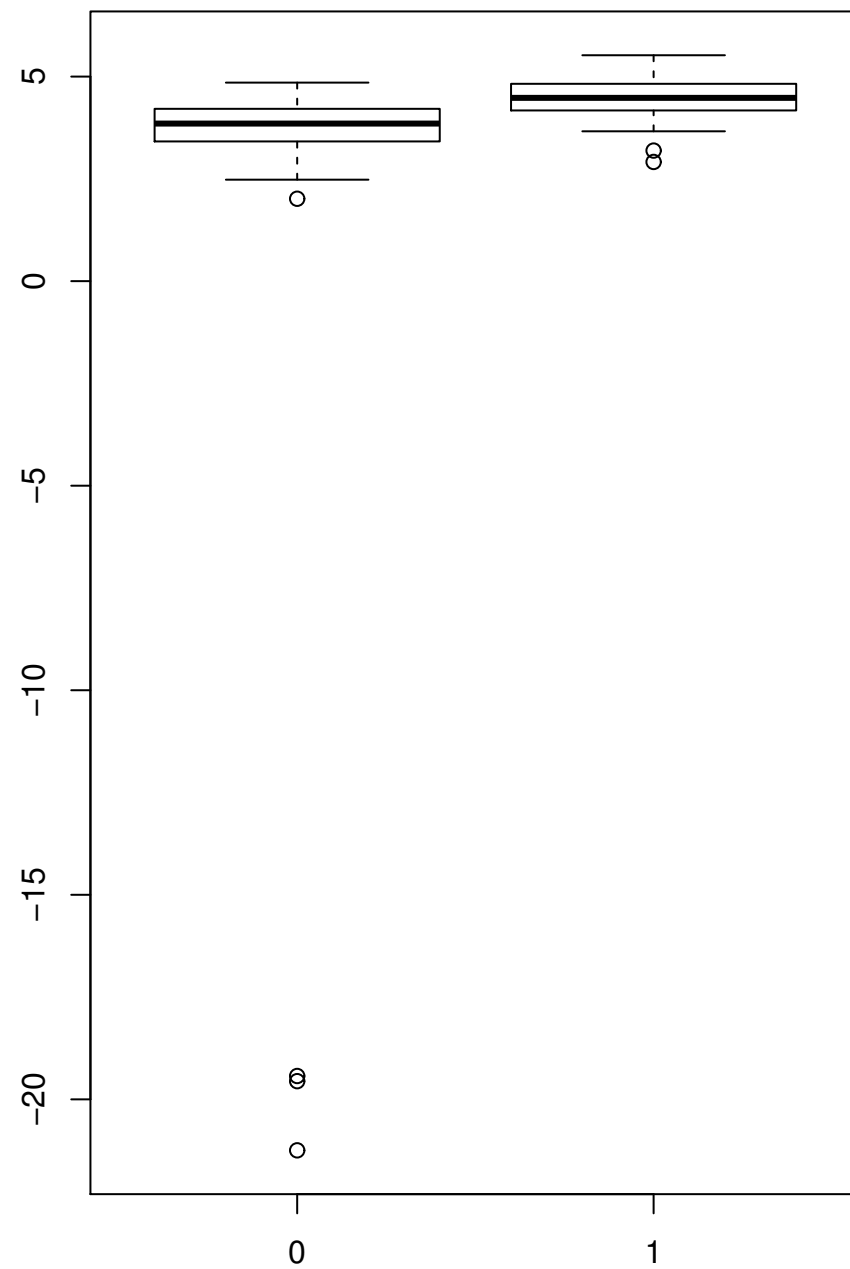

**hsa-miR-182  
(GSE67138)**

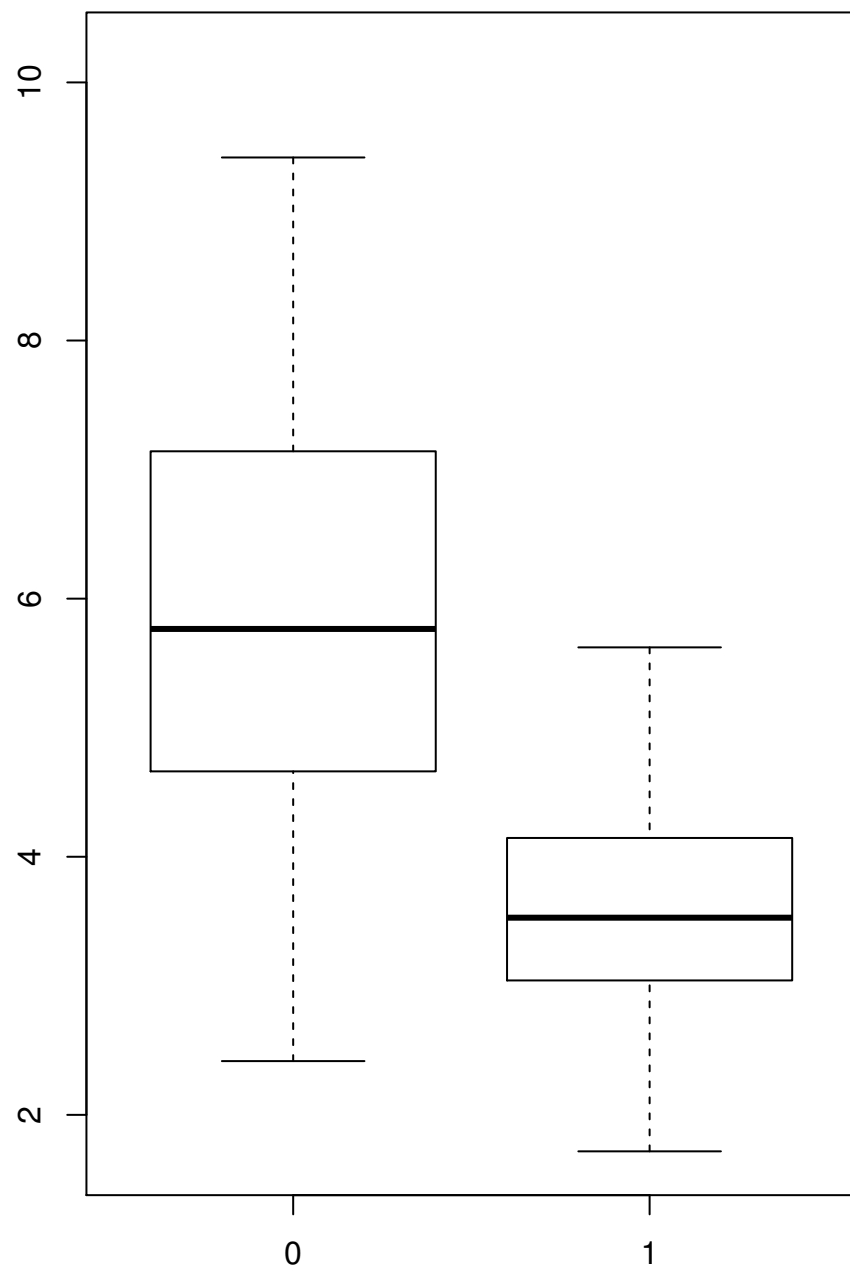

**hsa-miR-182  
(GSE67139)**

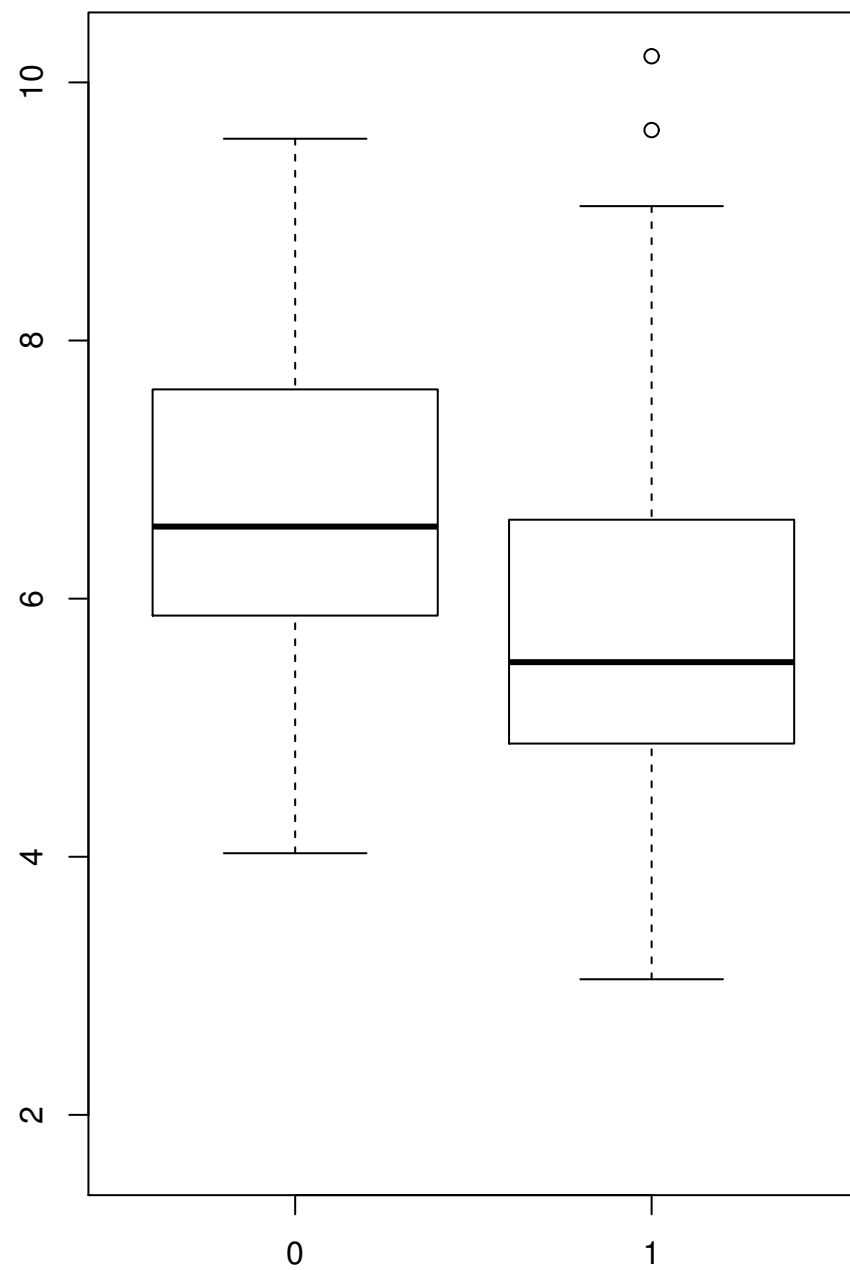

**hsa-miR-184  
(GSE67138)**

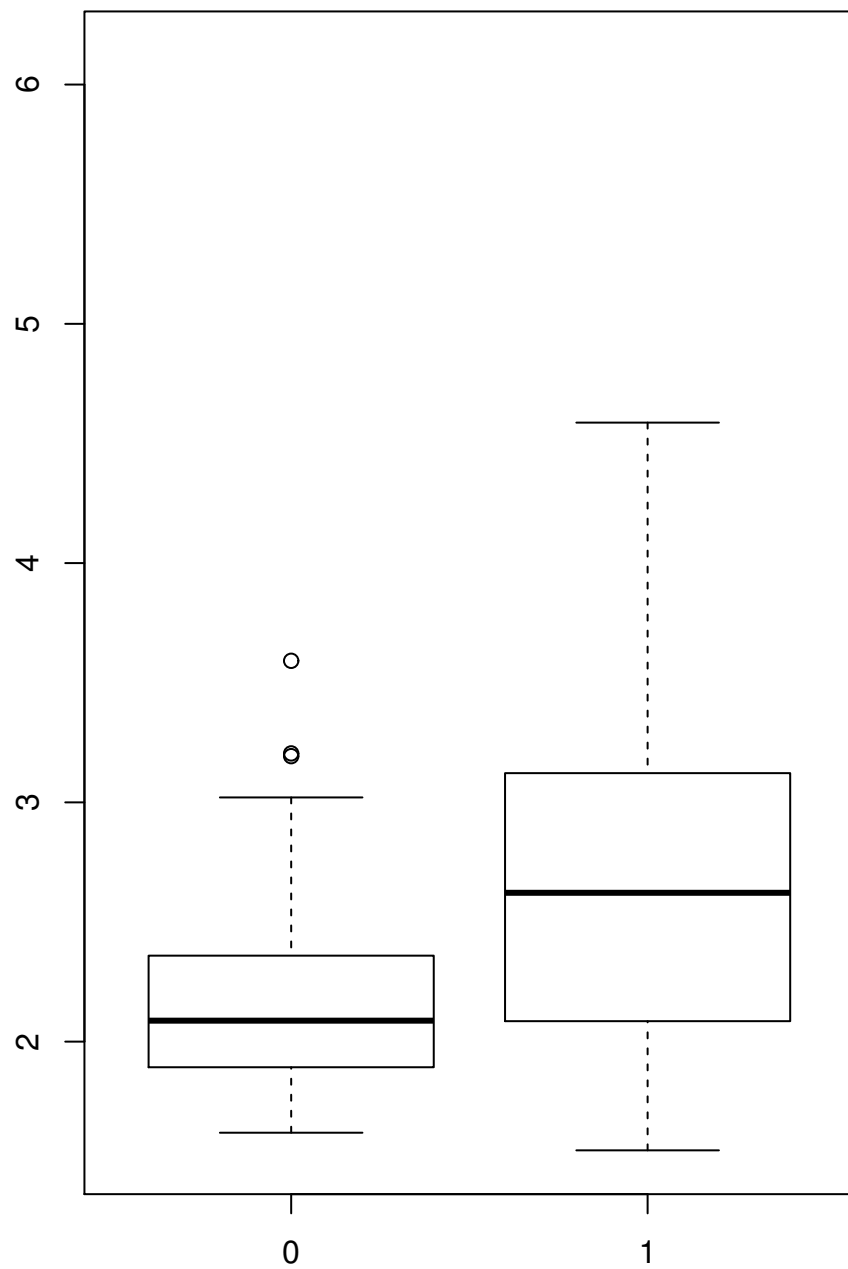

**hsa-miR-184  
(GSE67139)**

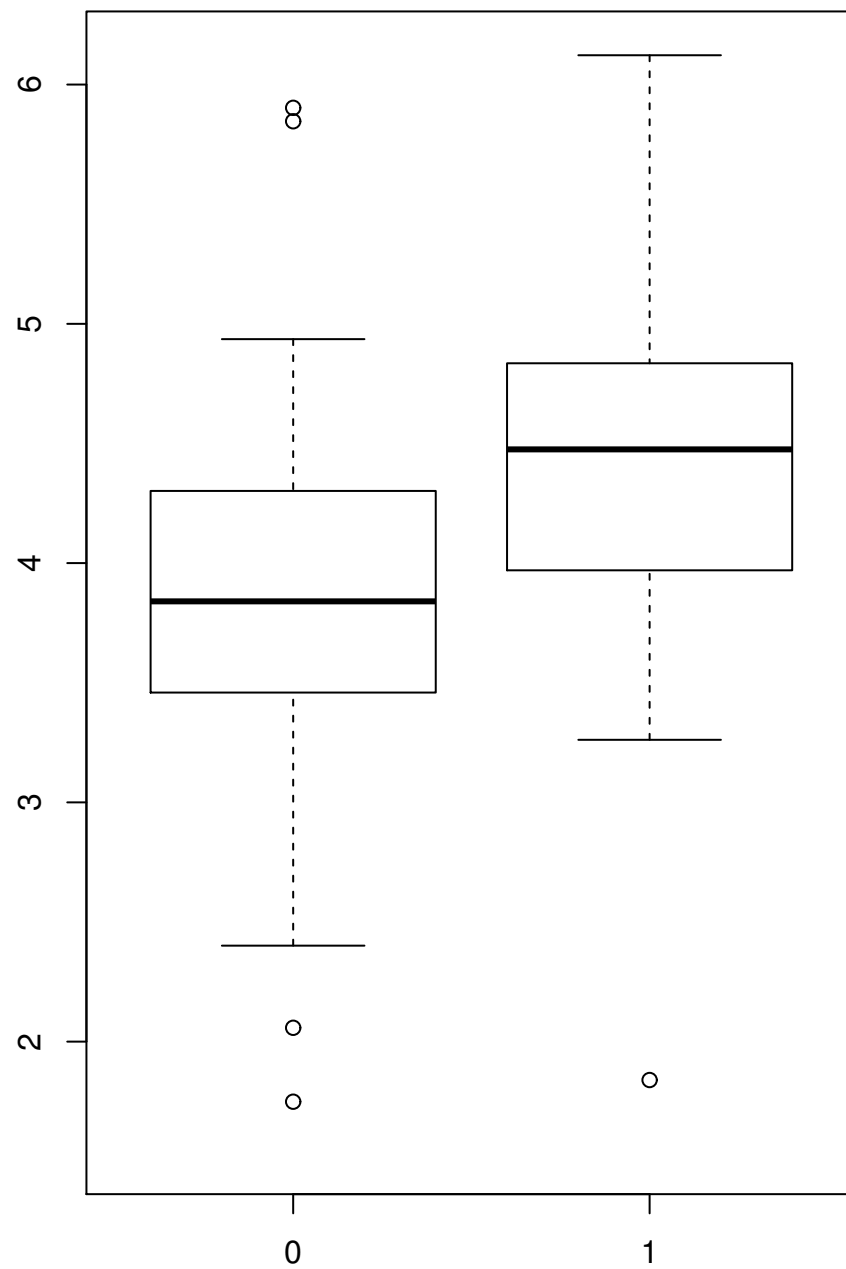

**hsa-miR-187-star**  
**(GSE67138)**

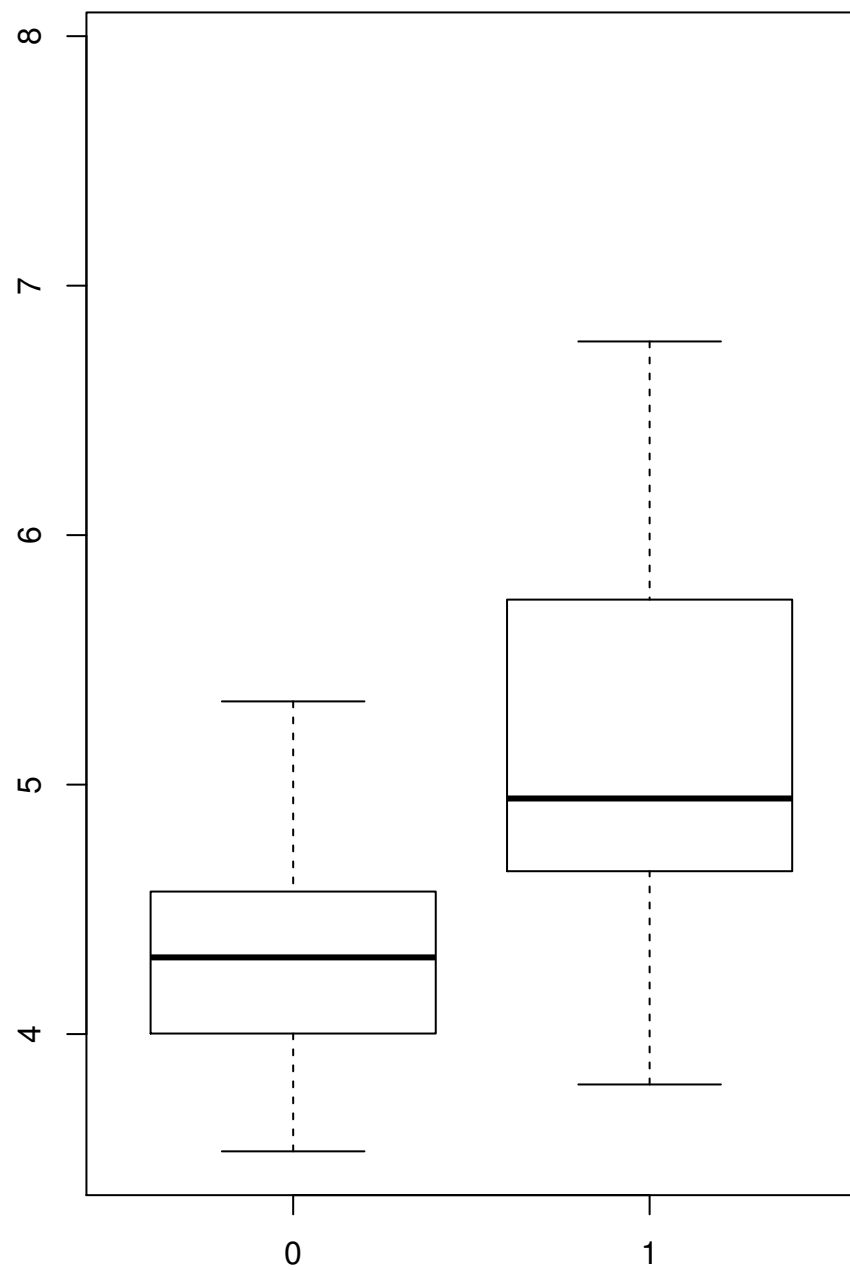

**hsa-miR-187-star**  
**(GSE67139)**

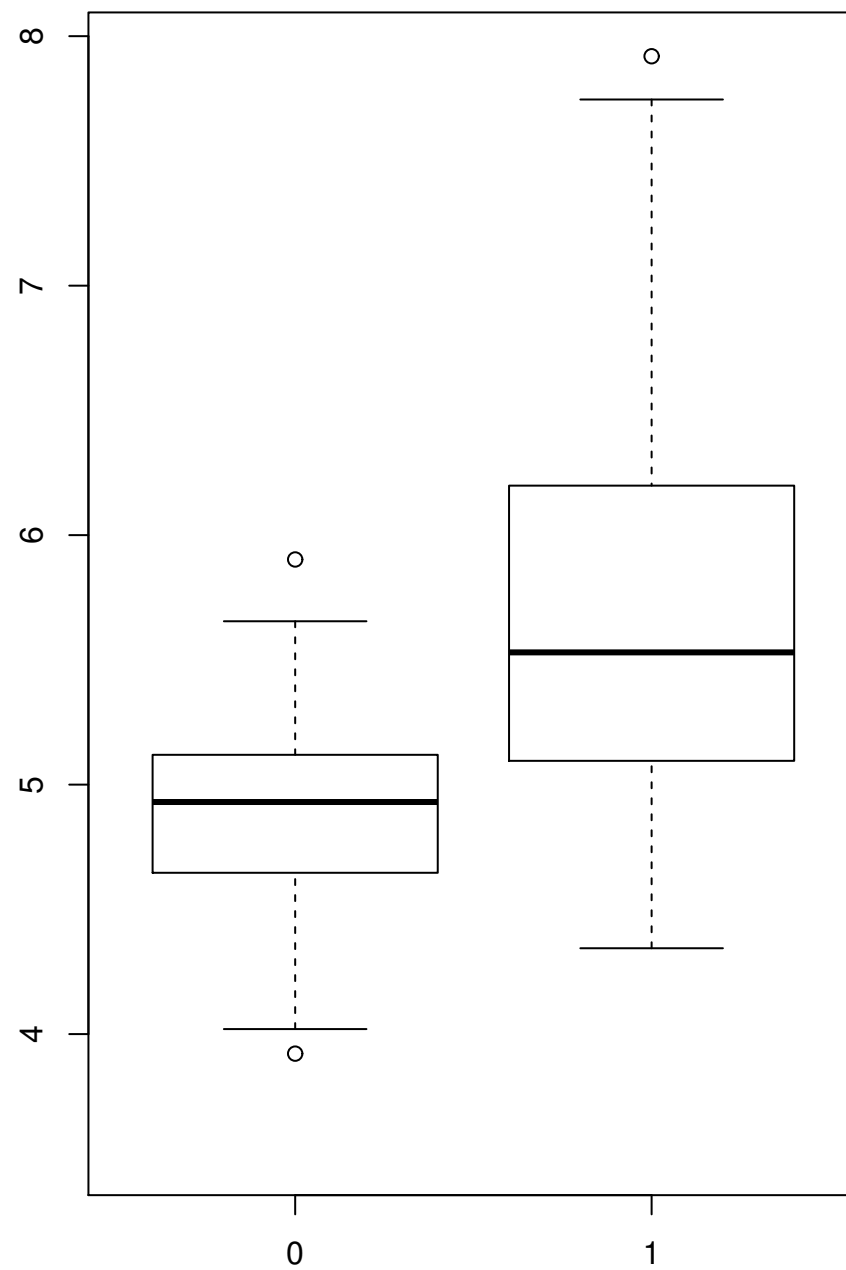

**hsa-miR-18a  
(GSE67138)**

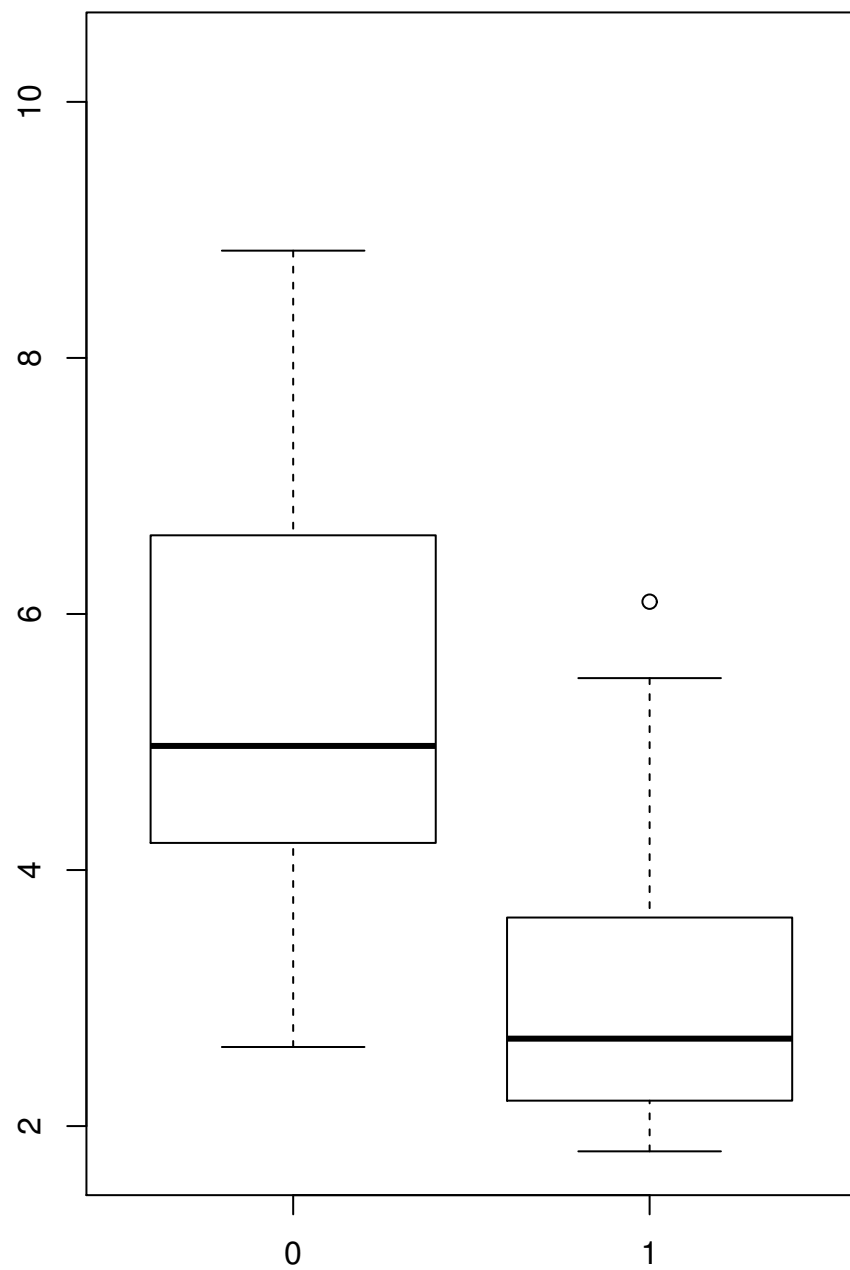

**hsa-miR-18a  
(GSE67139)**

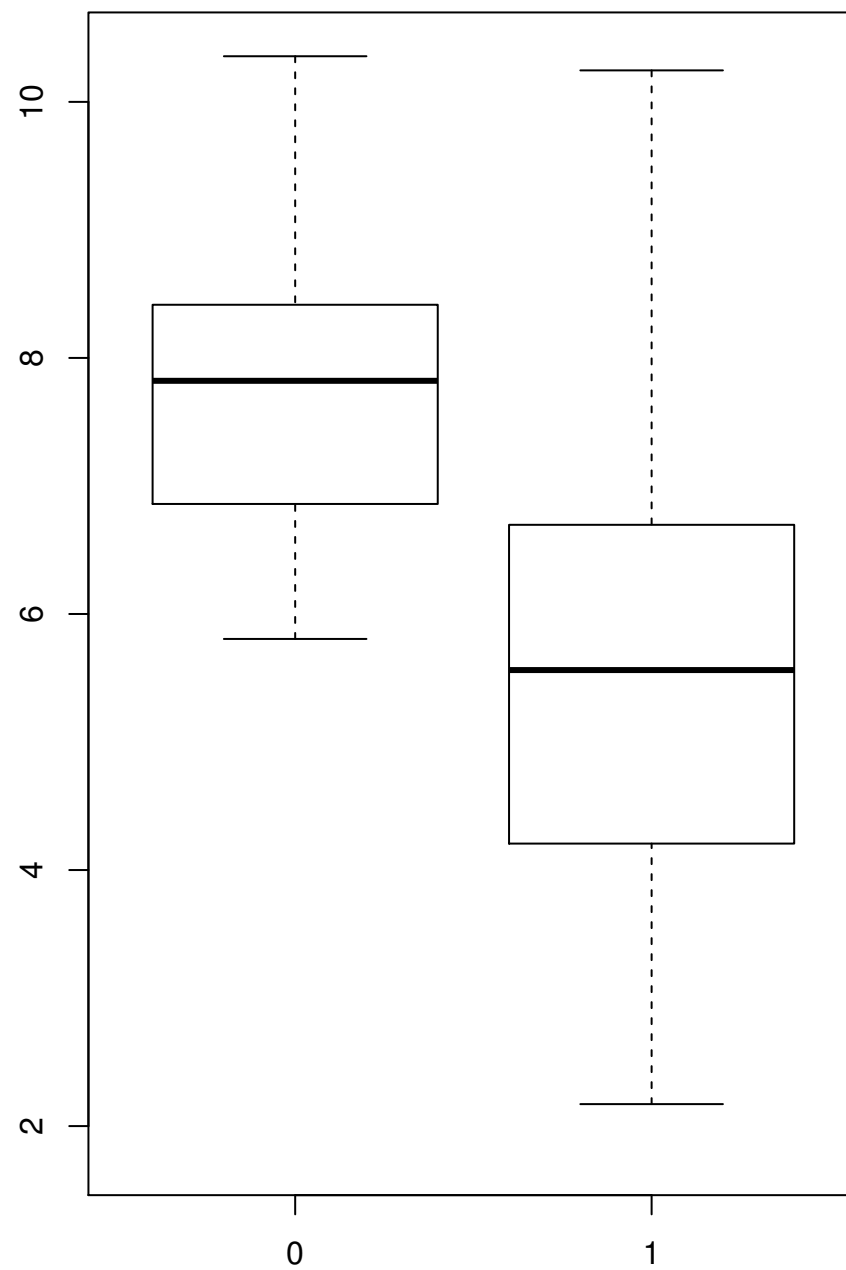

**hsa-miR-18b  
(GSE67138)**

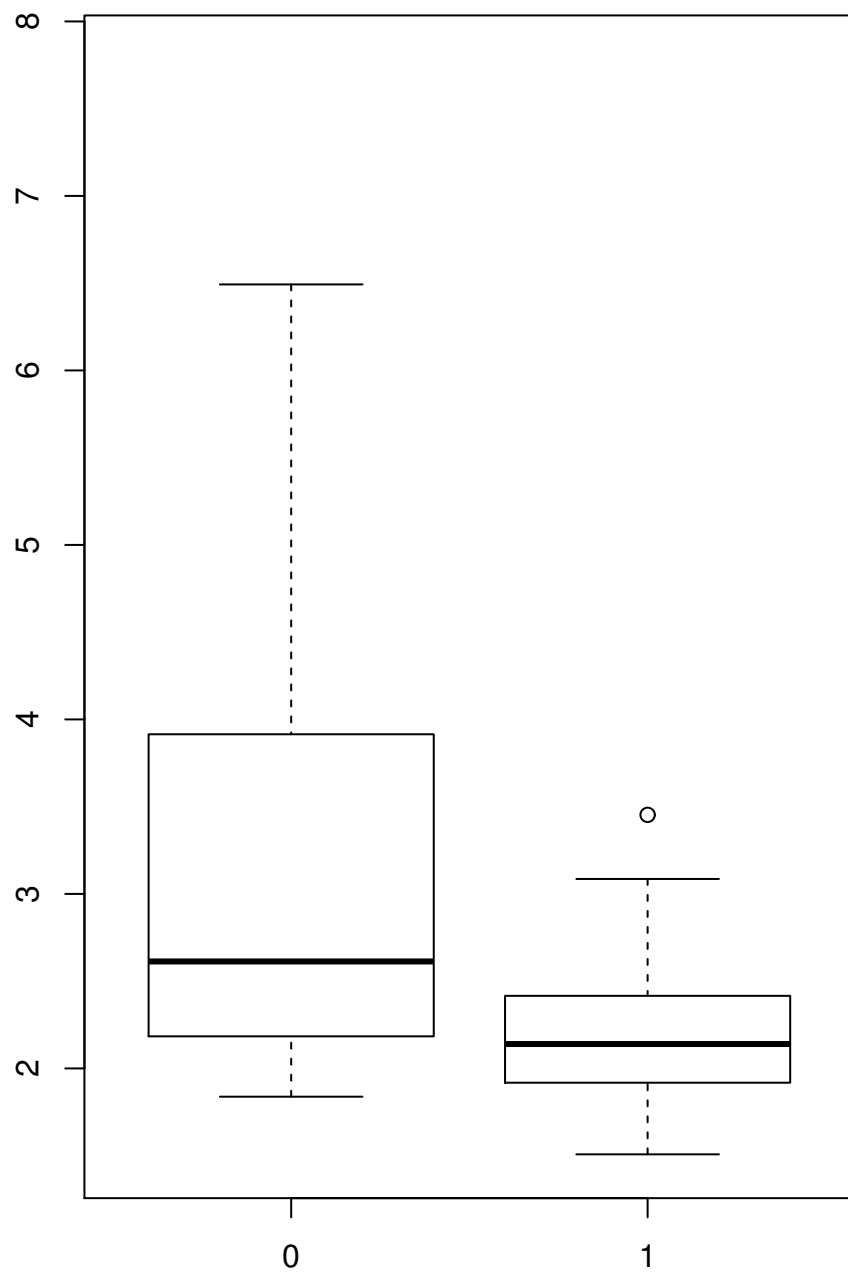

**hsa-miR-18b  
(GSE67139)**

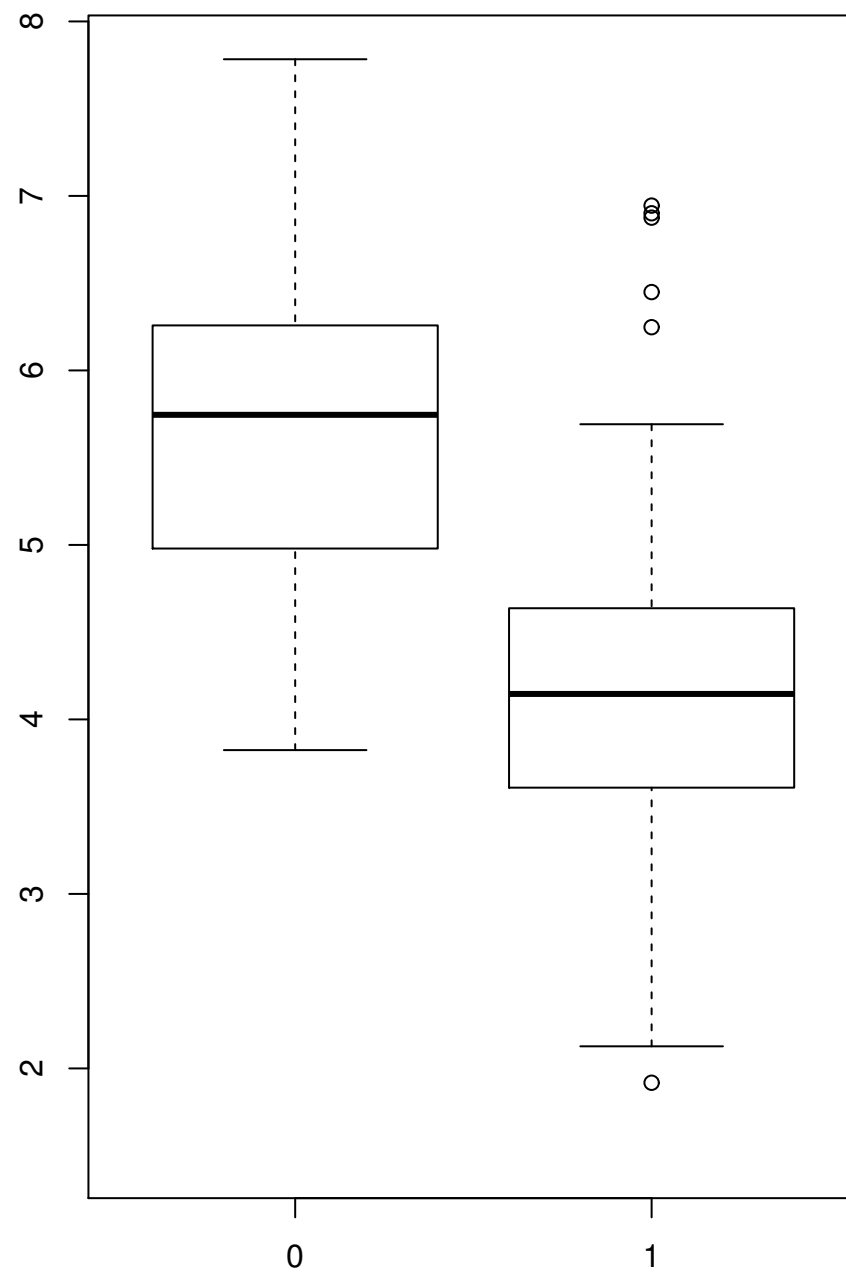



**hsa-miR-192-star**  
**(GSE67138)**

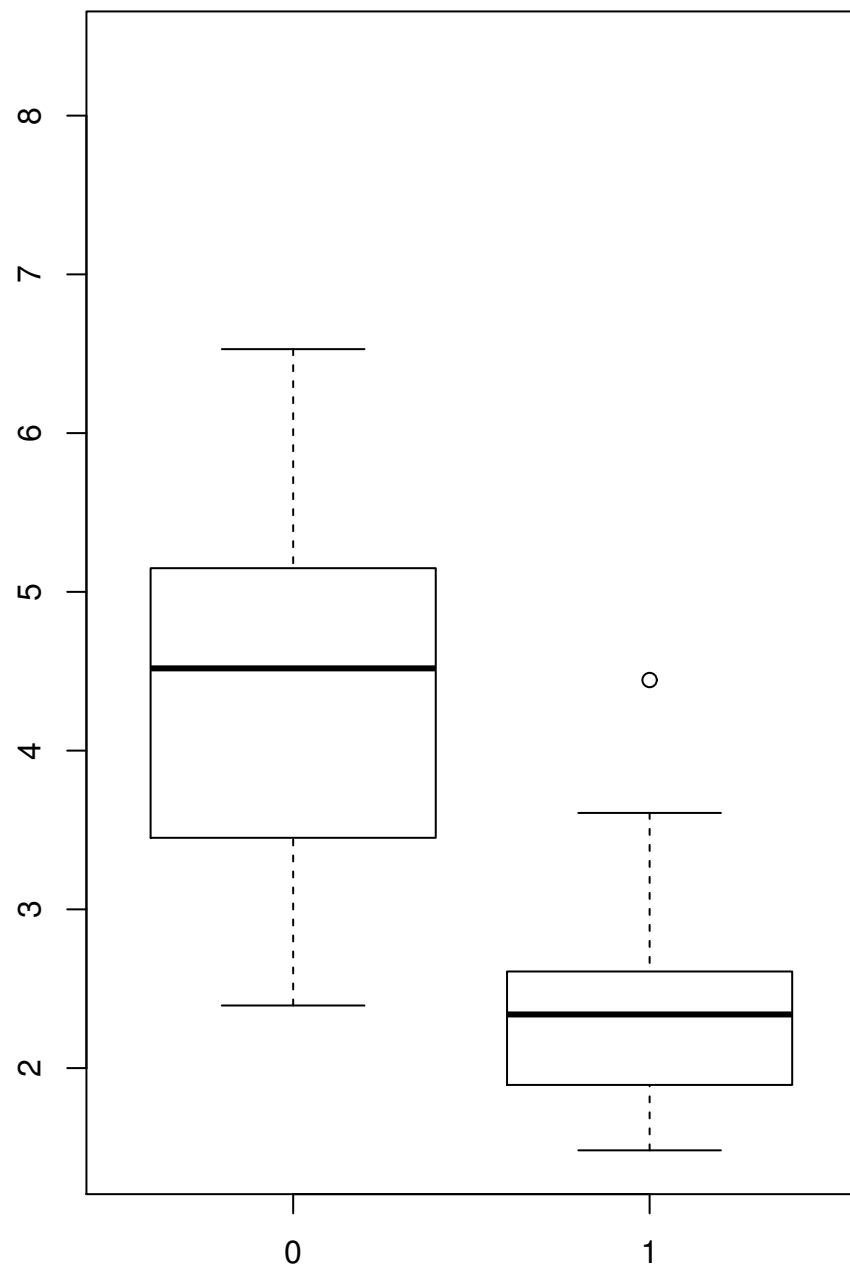

**hsa-miR-192-star**  
**(GSE67139)**

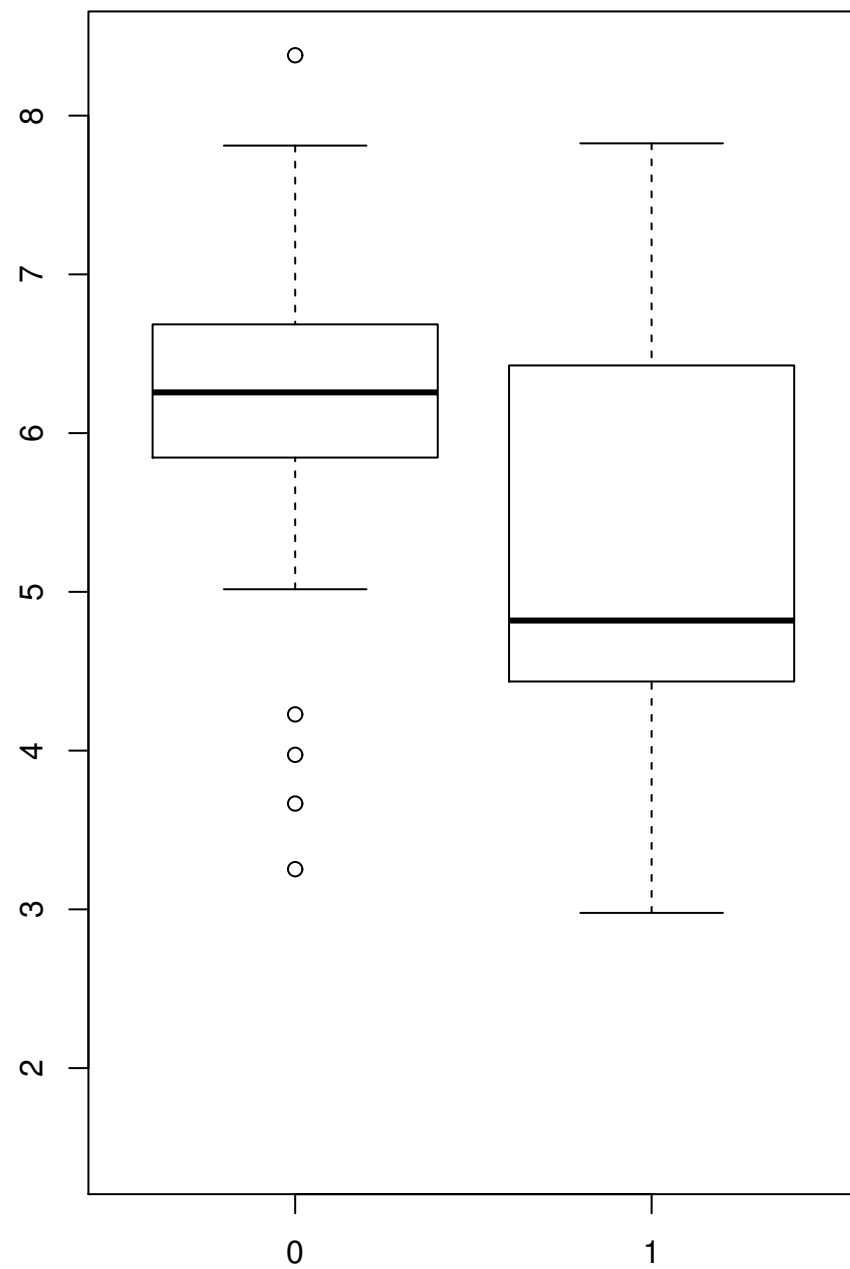

**hsa-miR-193a-3p  
(GSE67138)**

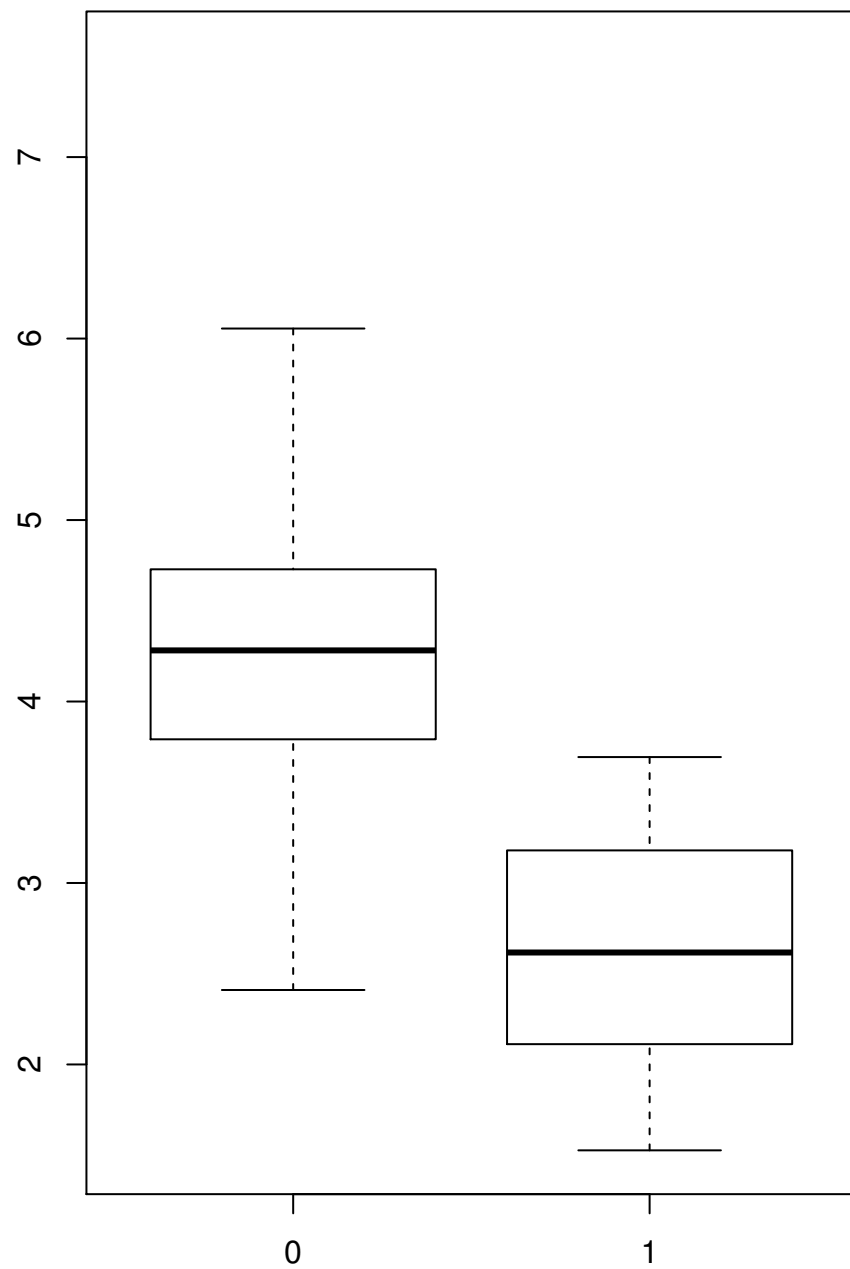

**hsa-miR-193a-3p  
(GSE67139)**

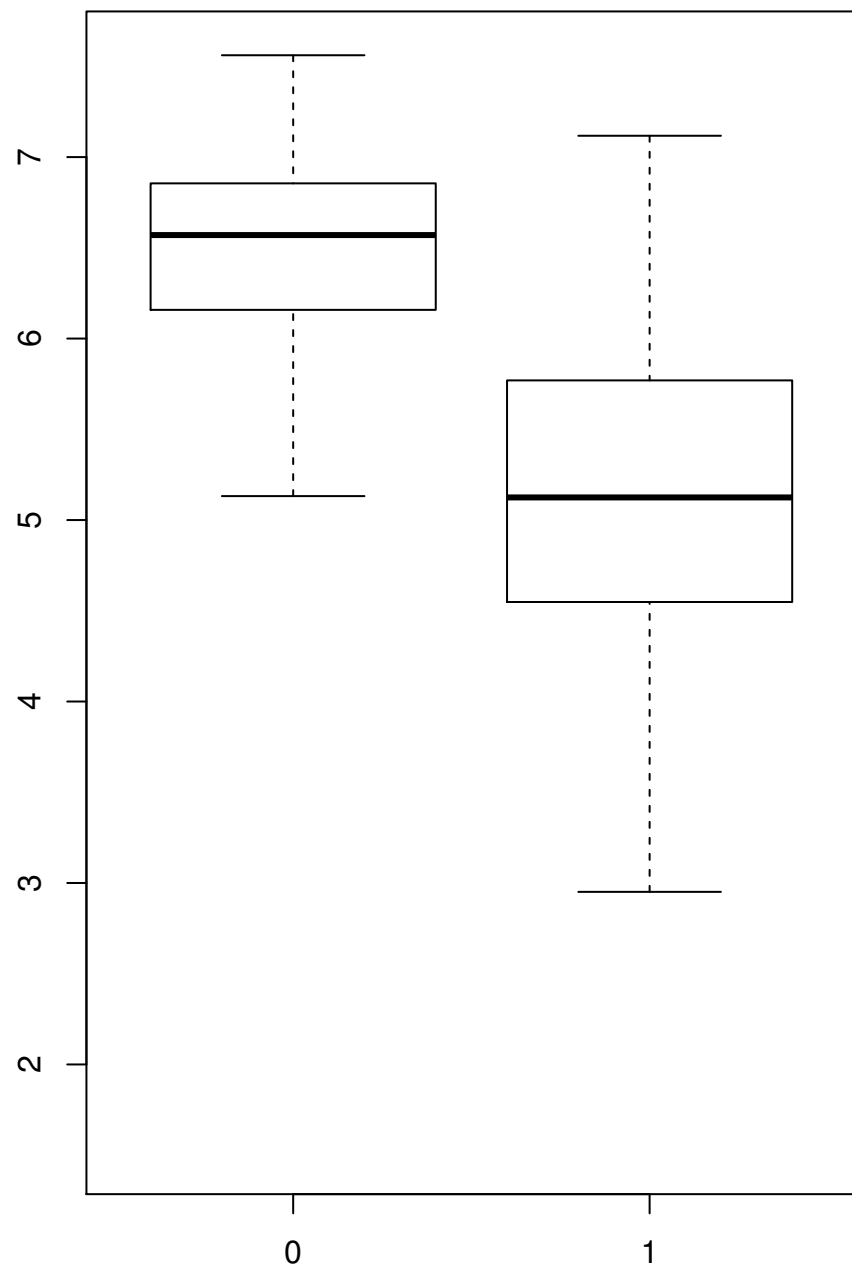

**hsa-miR-196a-star**  
**(GSE67138)**

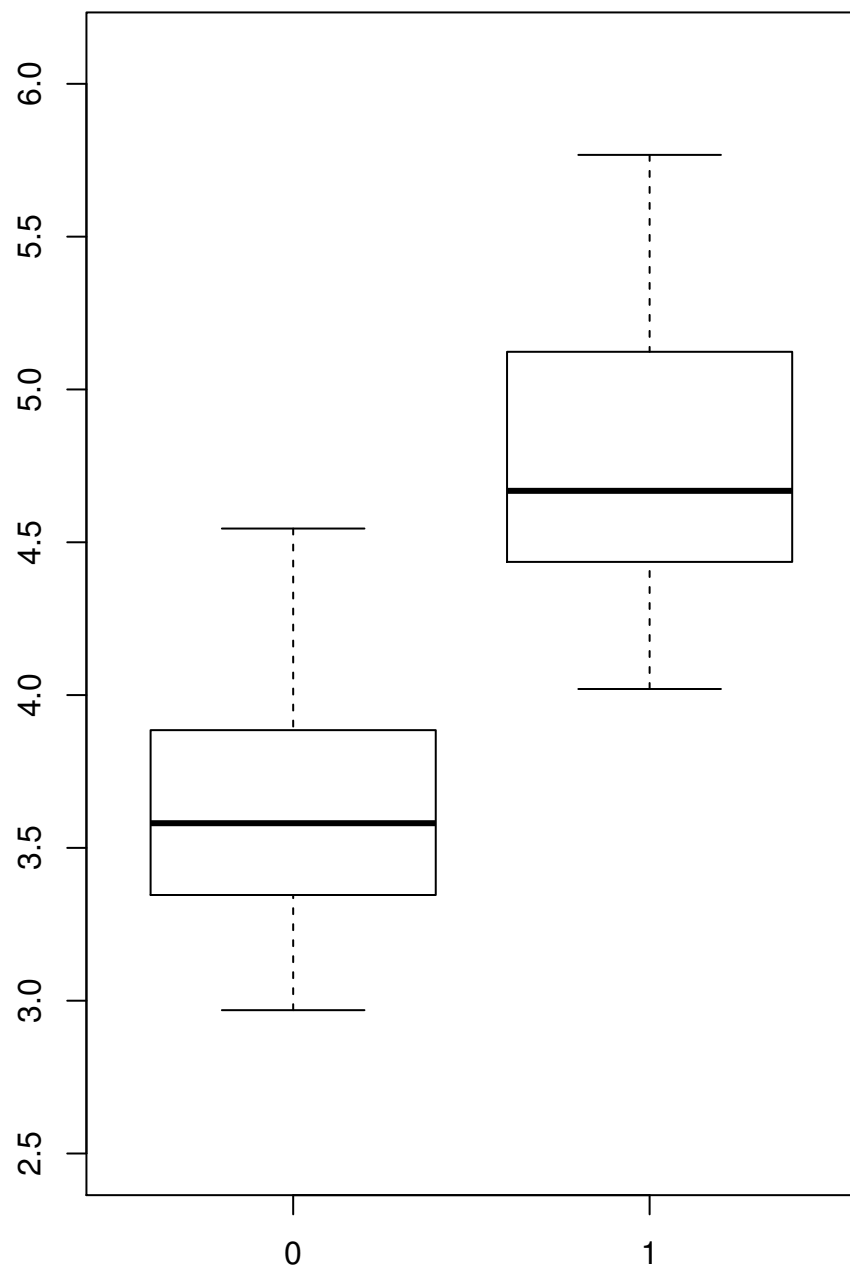

**hsa-miR-196a-star**  
**(GSE67139)**

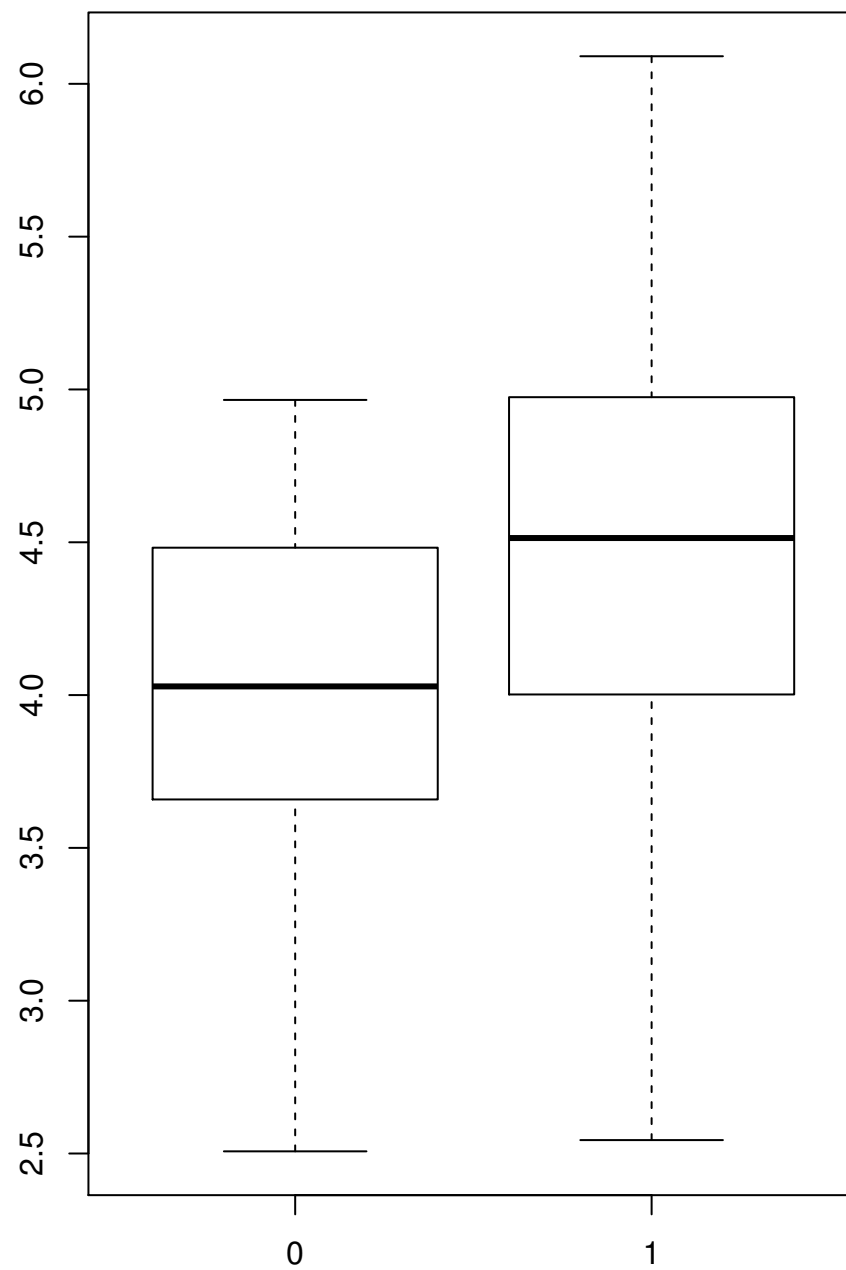

**hsa-miR-197**  
**(GSE67138)**

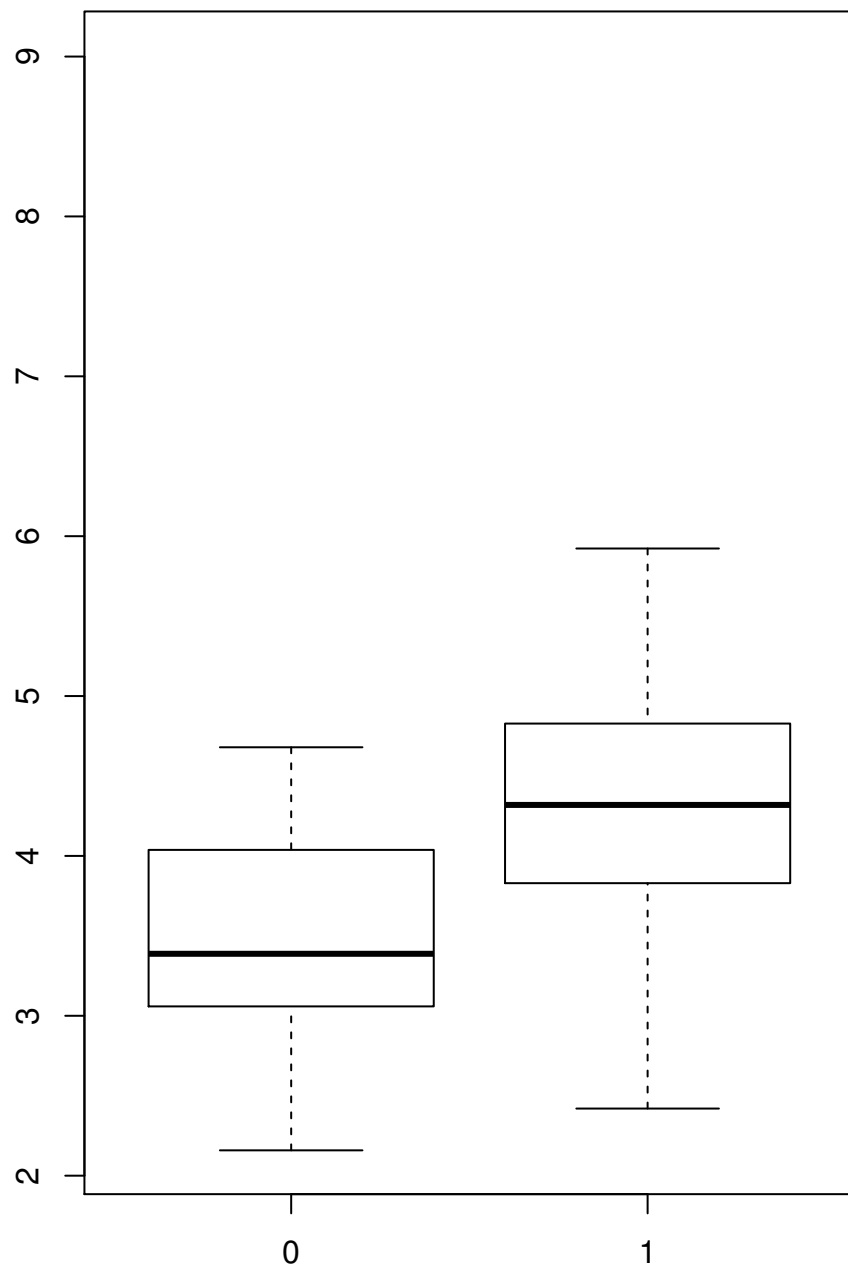

**hsa-miR-197**  
**(GSE67139)**

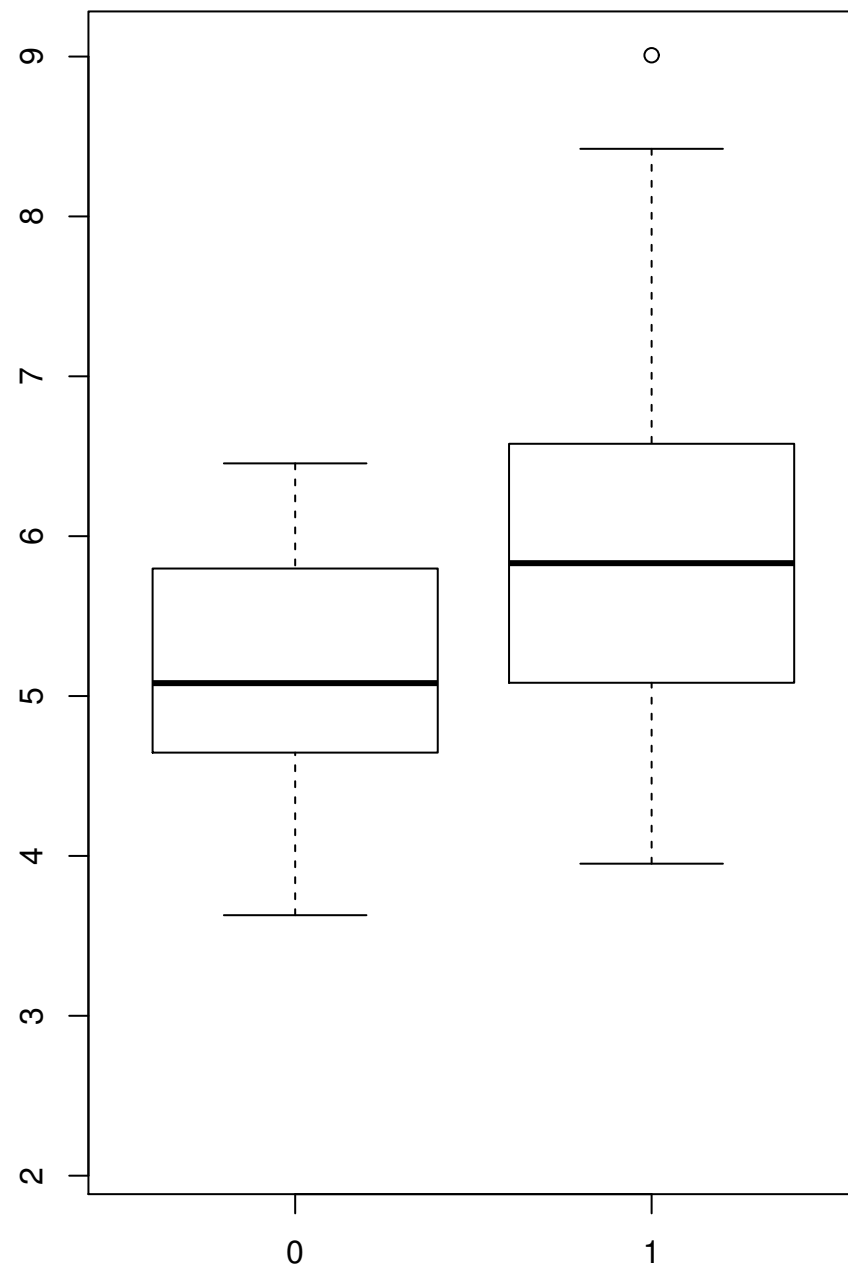

**hsa-miR-198  
(GSE67138)**

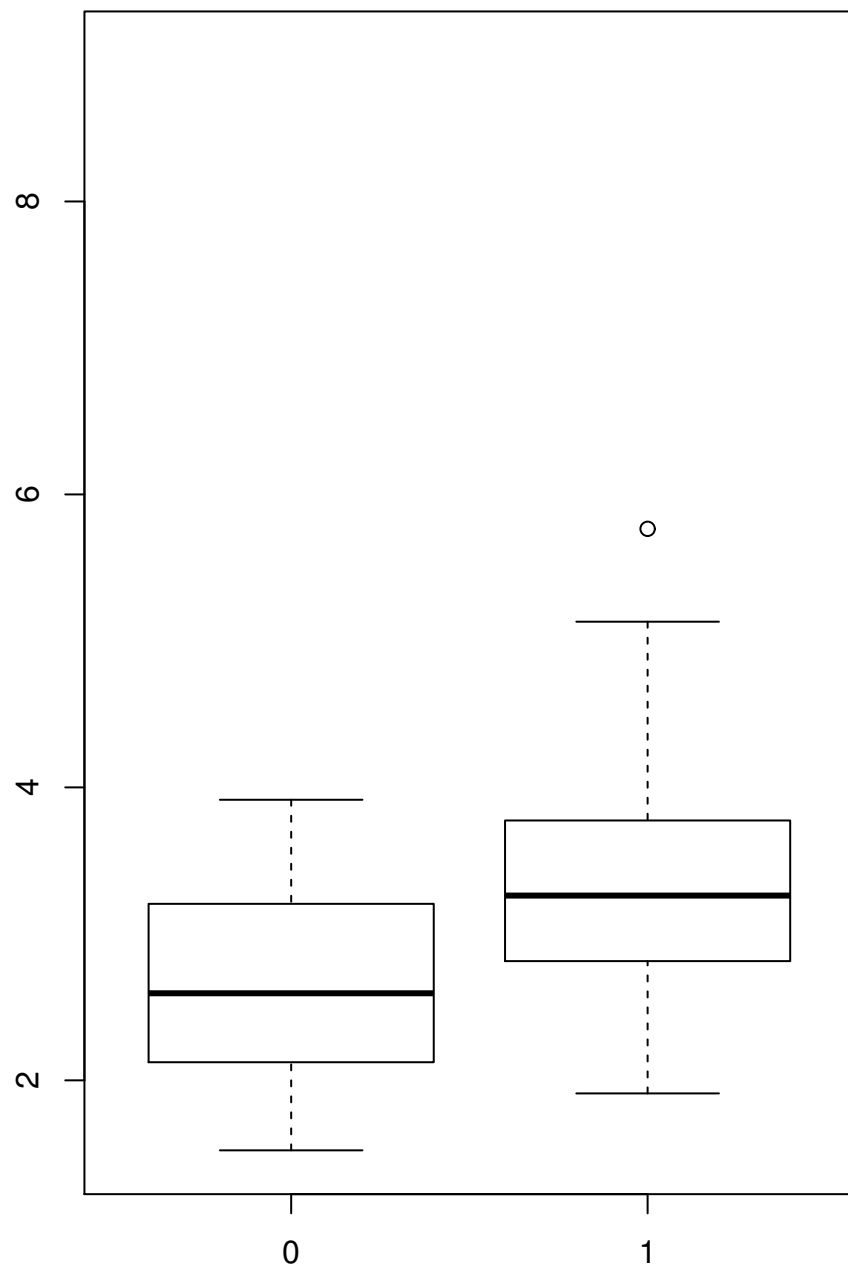

**hsa-miR-198  
(GSE67139)**

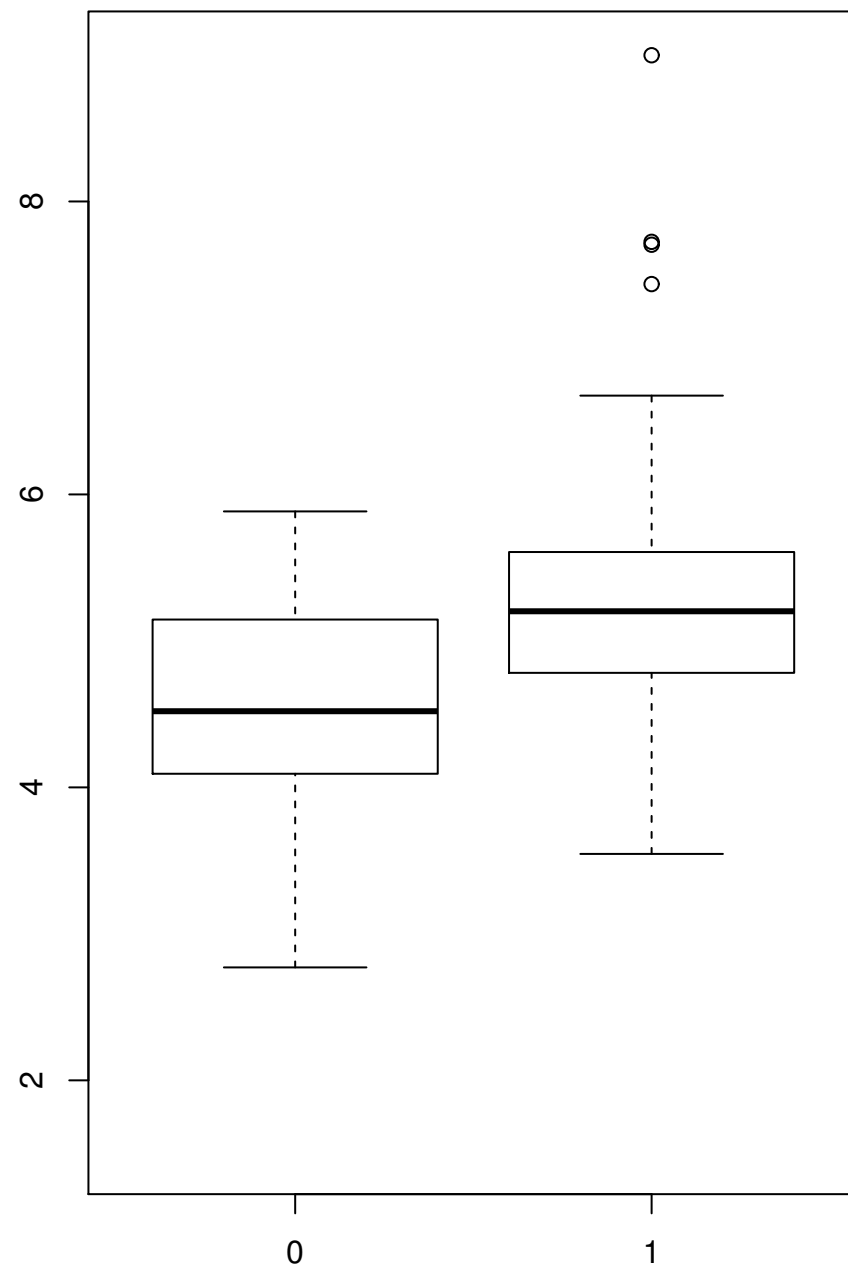

**hsa-miR-199a-5p  
(GSE67138)**

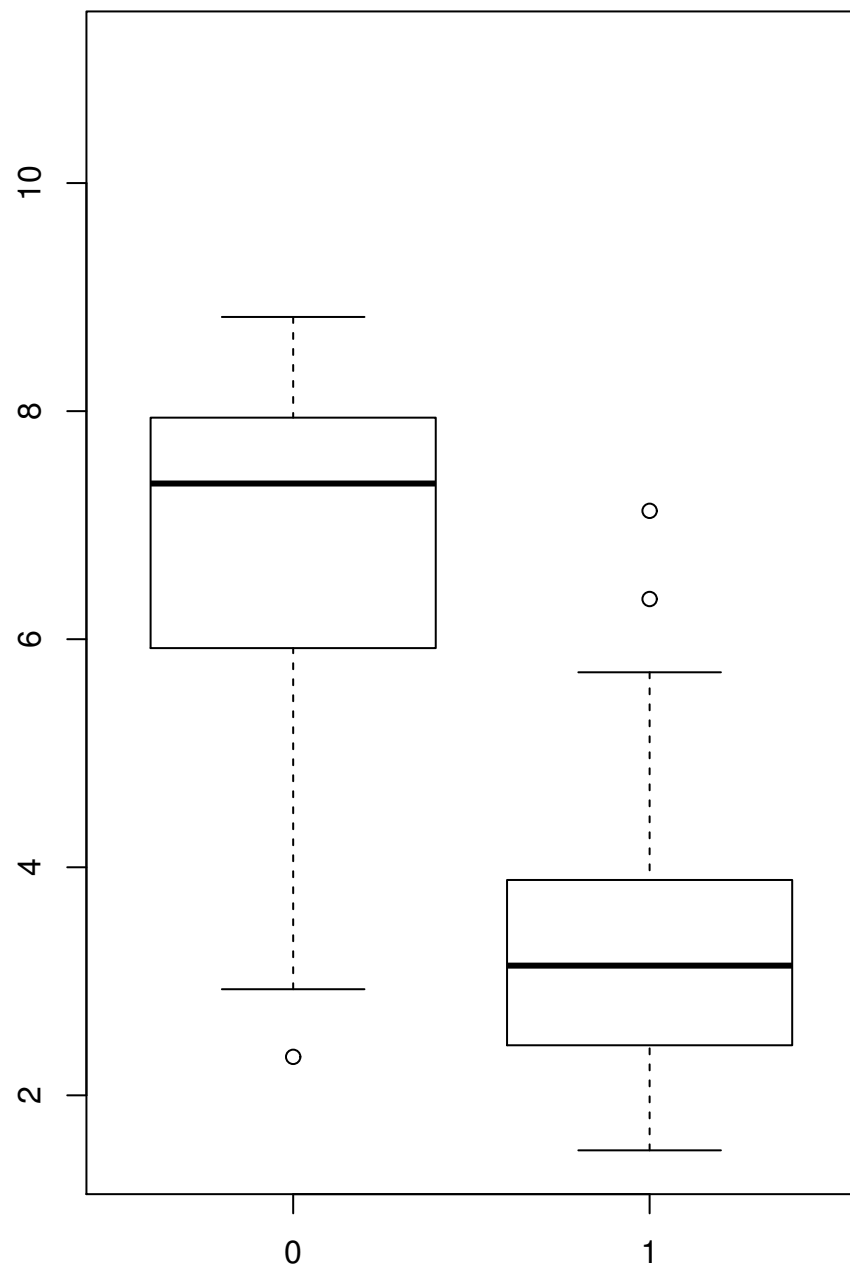

**hsa-miR-199a-5p  
(GSE67139)**

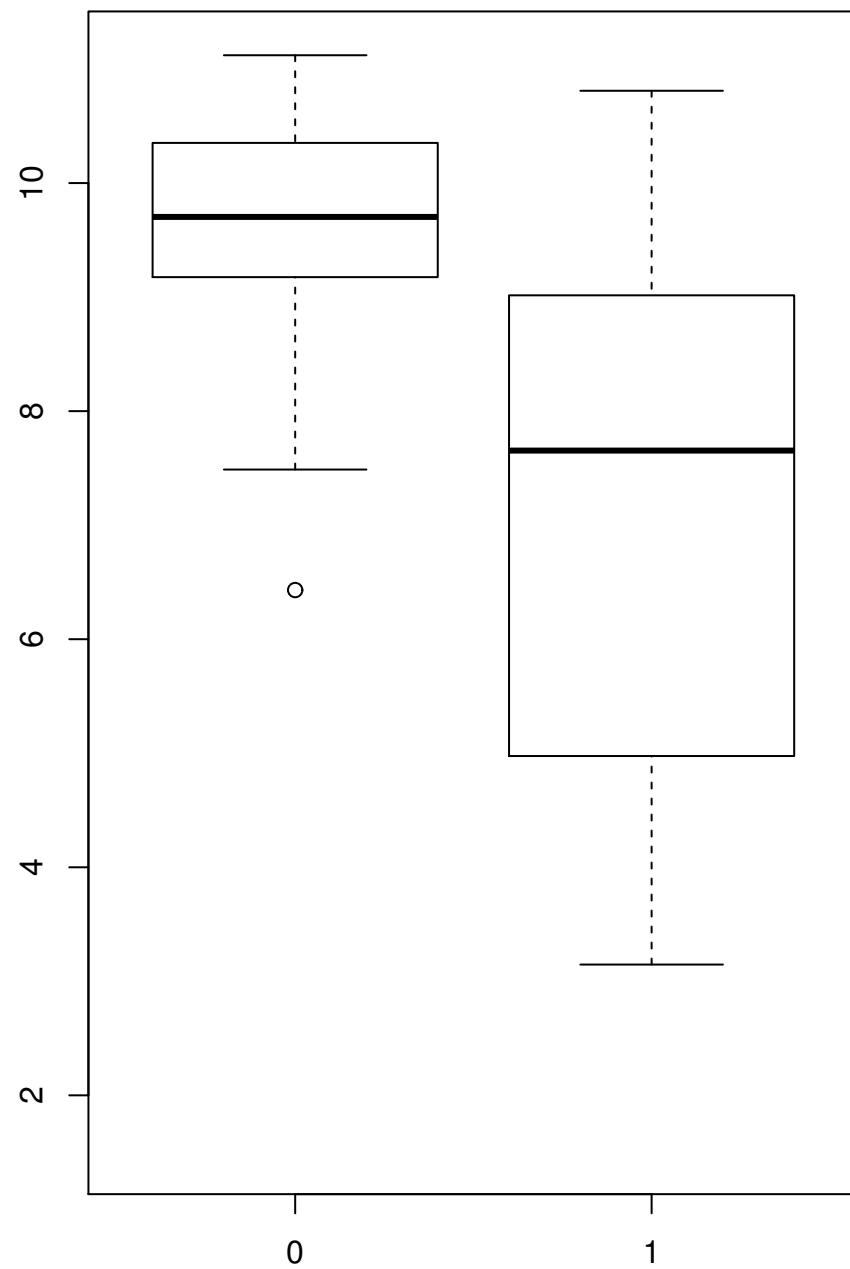

**hsa-miR-199b-3p  
(GSE67138)**

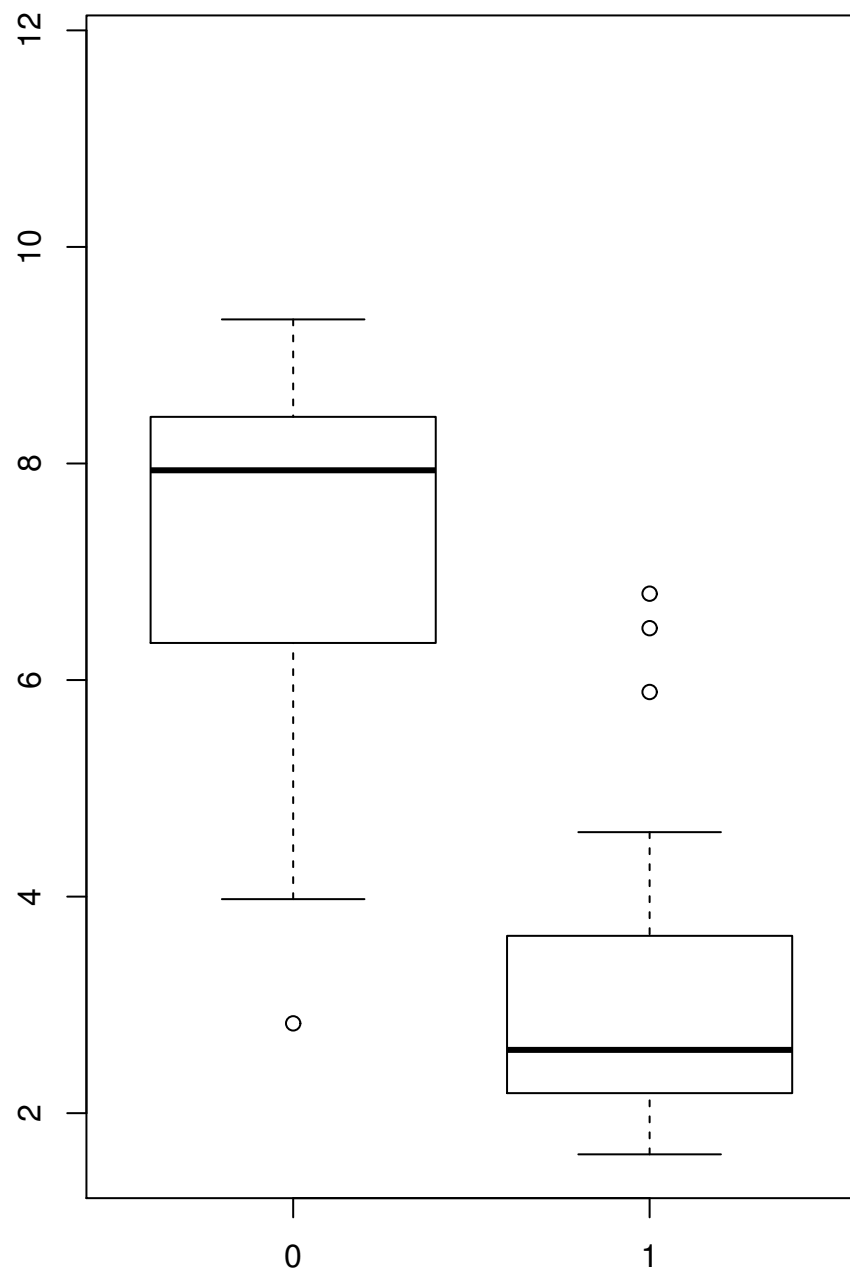

**hsa-miR-199b-3p  
(GSE67139)**

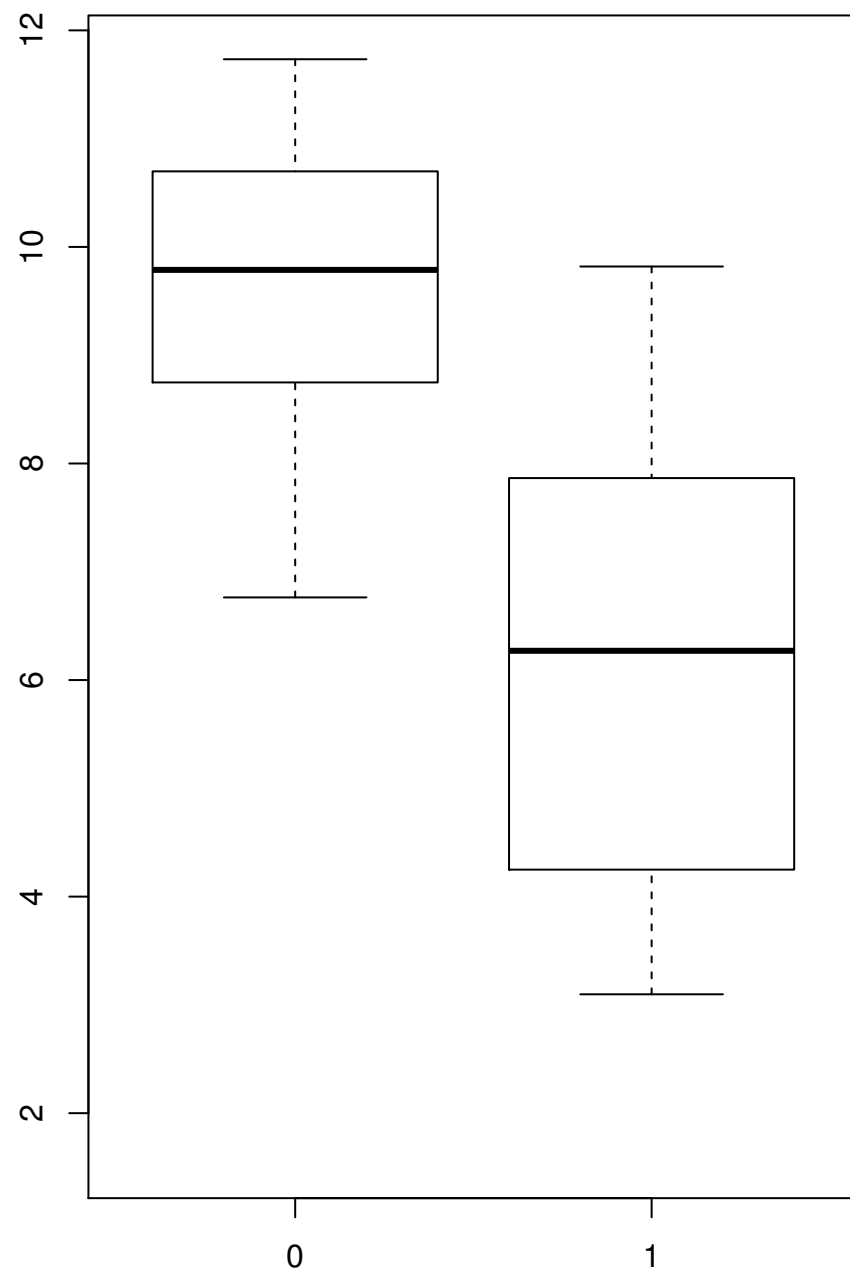

**hsa-miR-19b**  
**(GSE67138)**

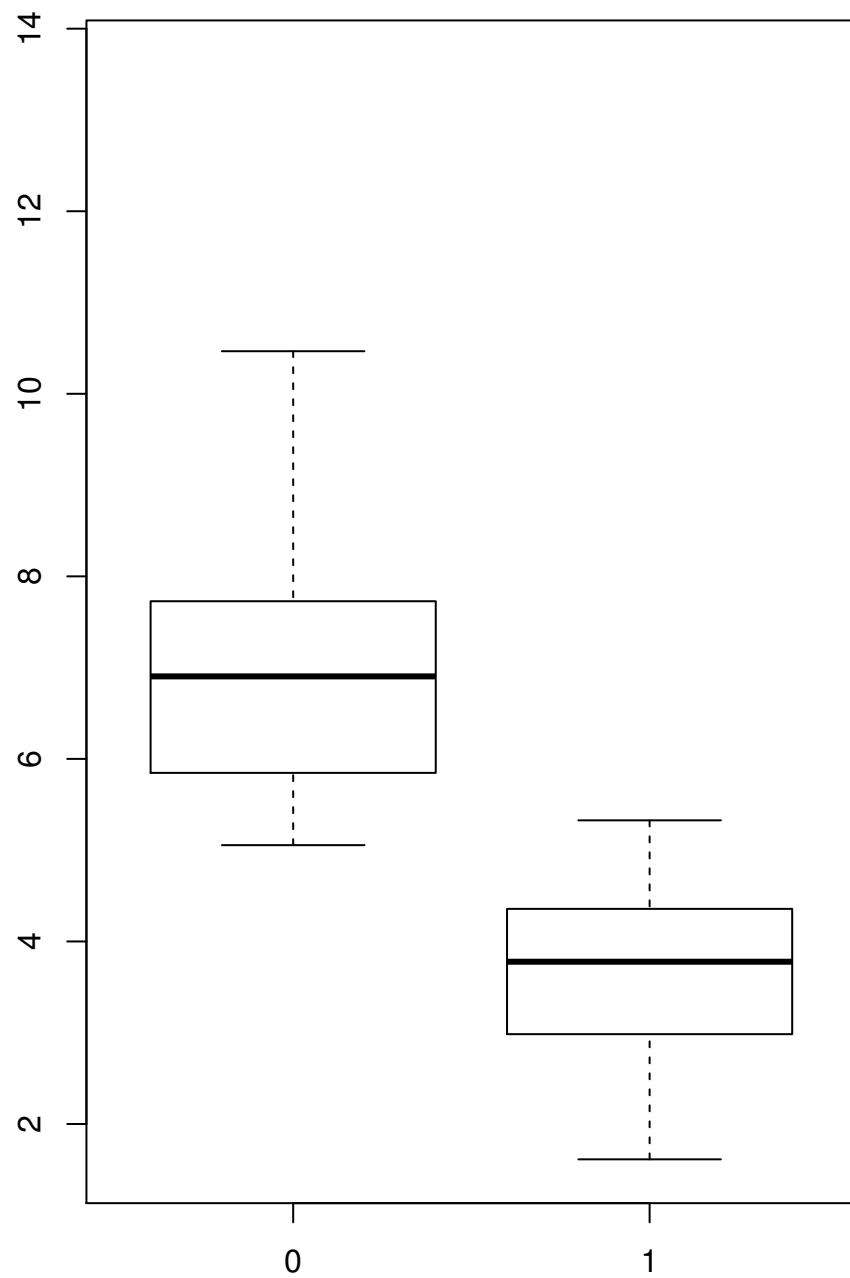

**hsa-miR-19b**  
**(GSE67139)**

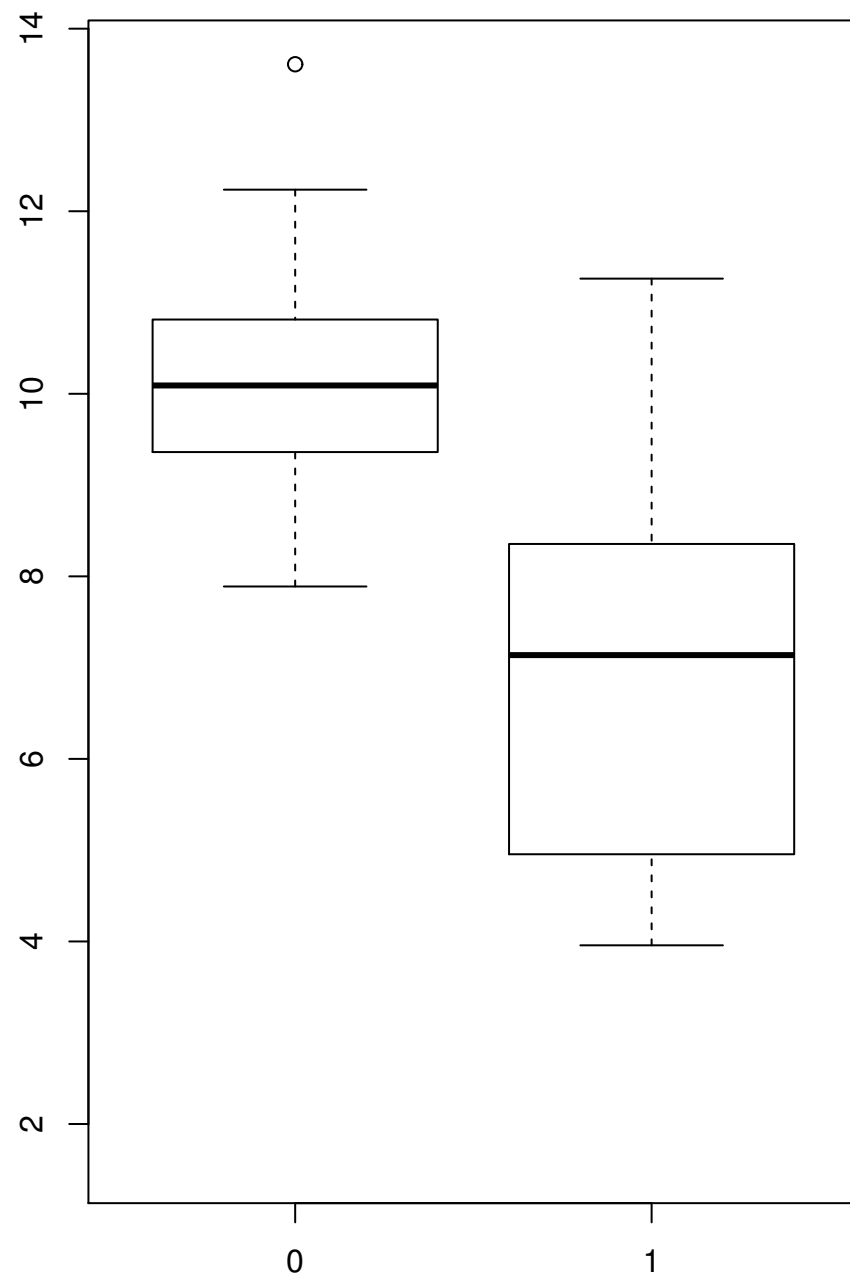



**hsa-miR-200a**  
**(GSE67138)**

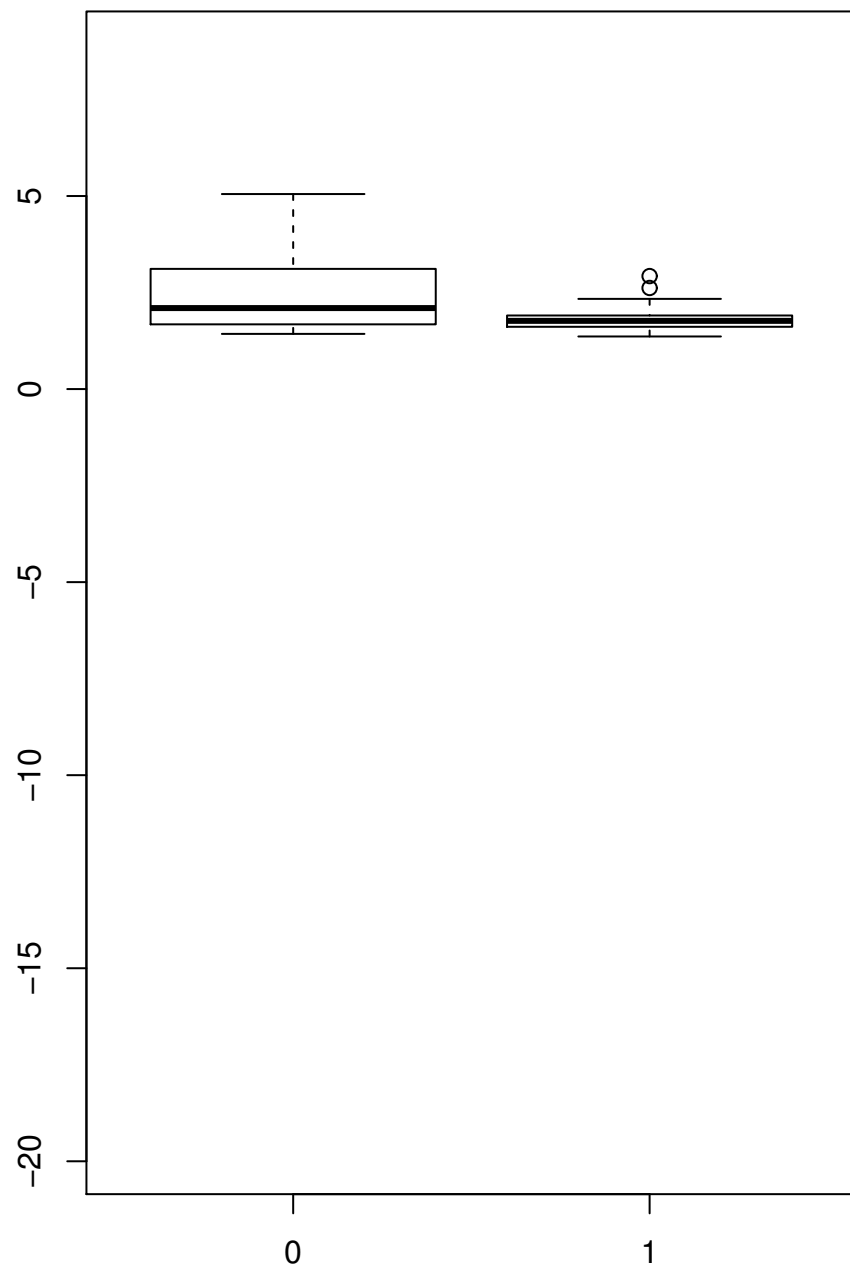

**hsa-miR-200a**  
**(GSE67139)**

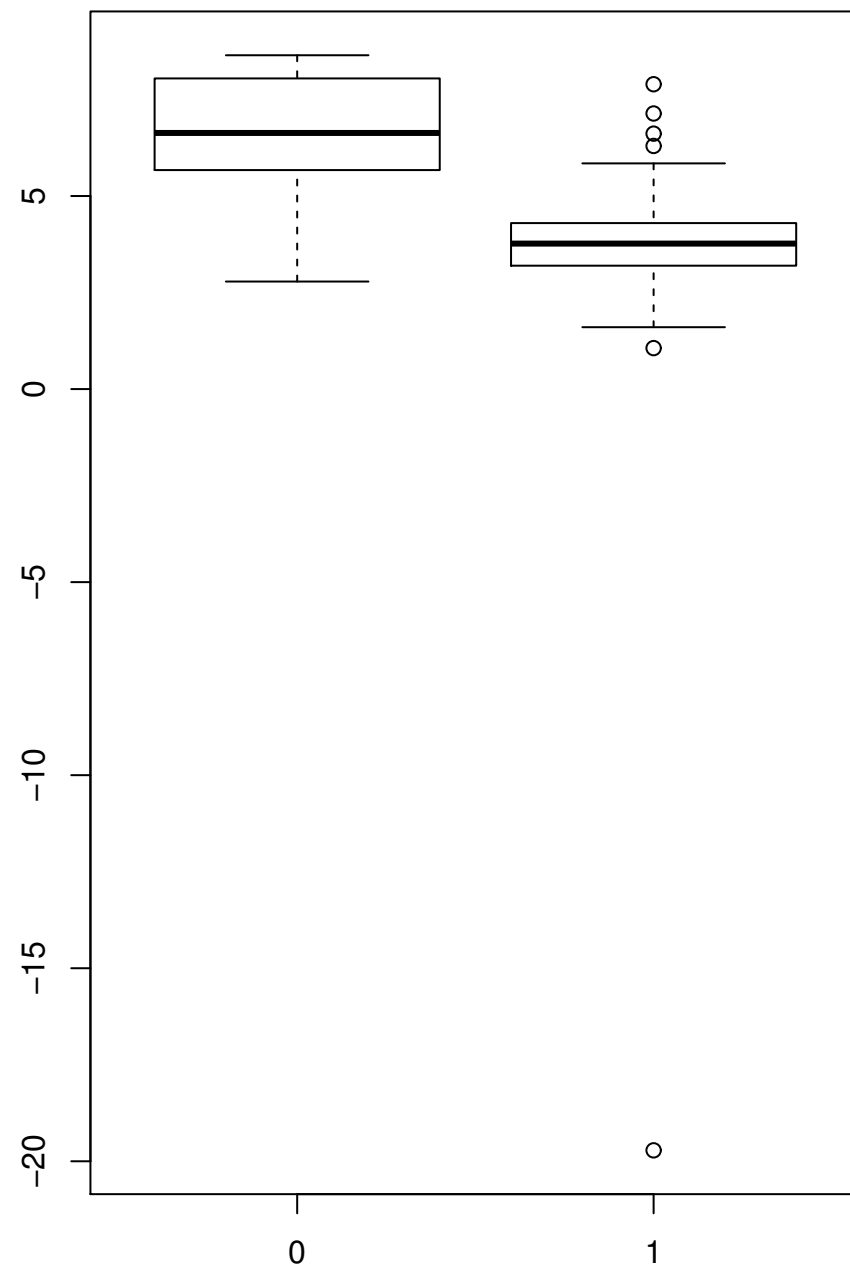

**hsa-miR-200b**  
**(GSE67138)**

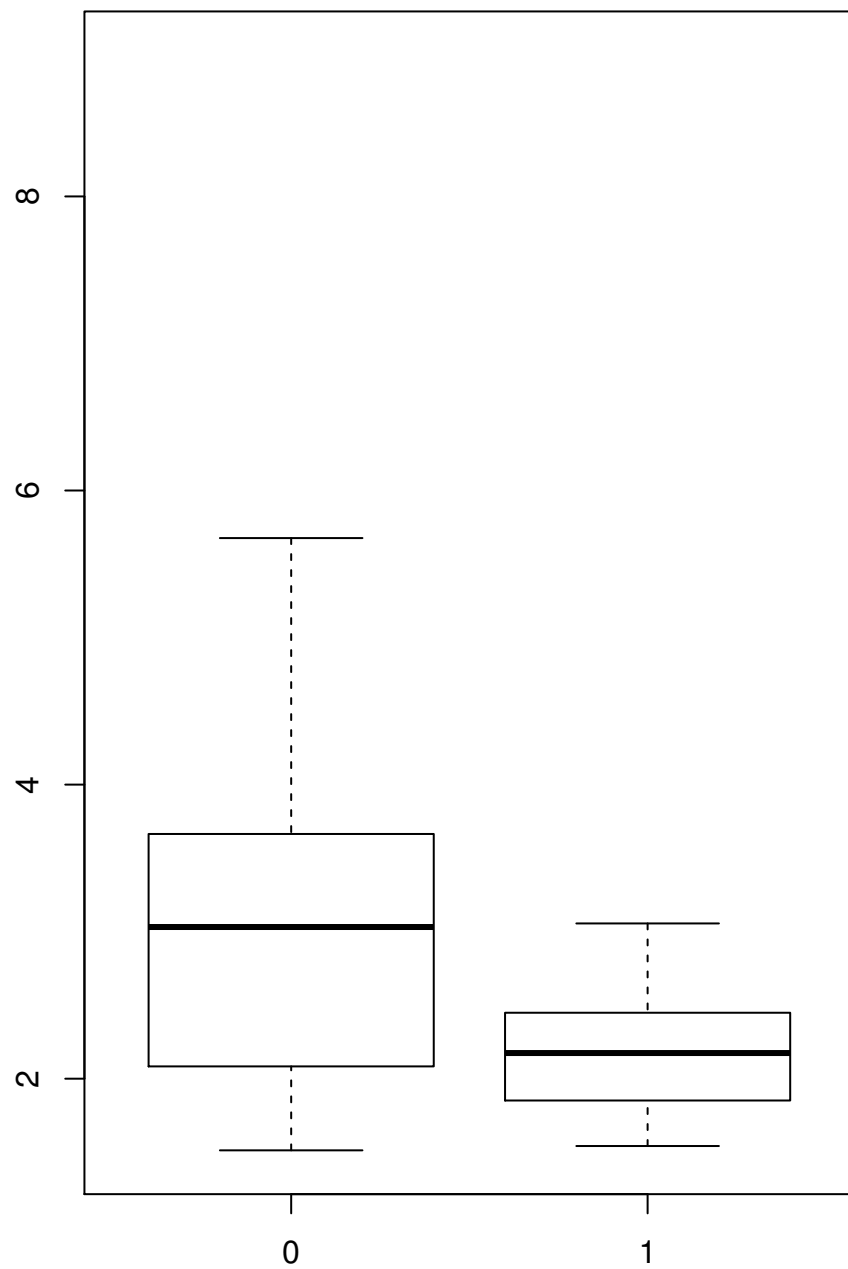

**hsa-miR-200b**  
**(GSE67139)**

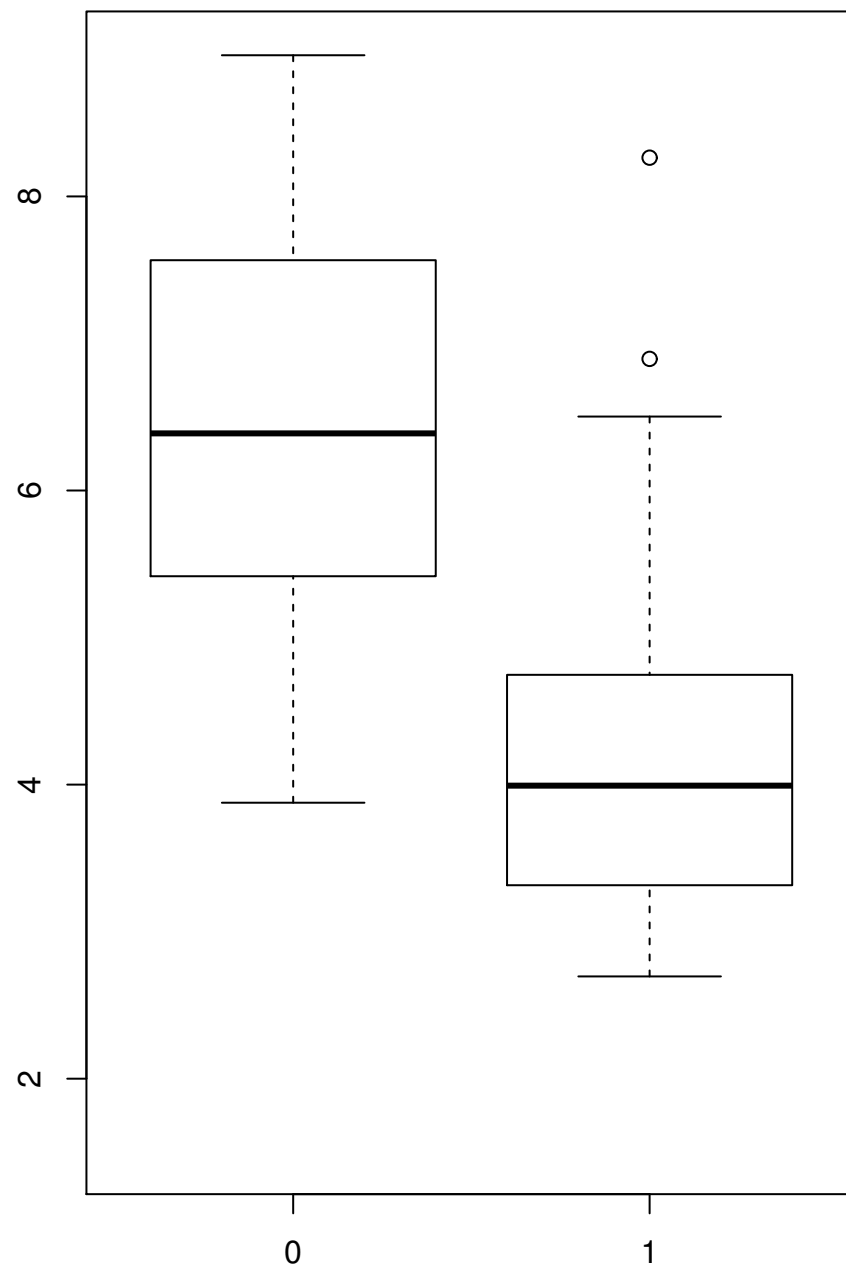

**hsa-miR-200c  
(GSE67138)**

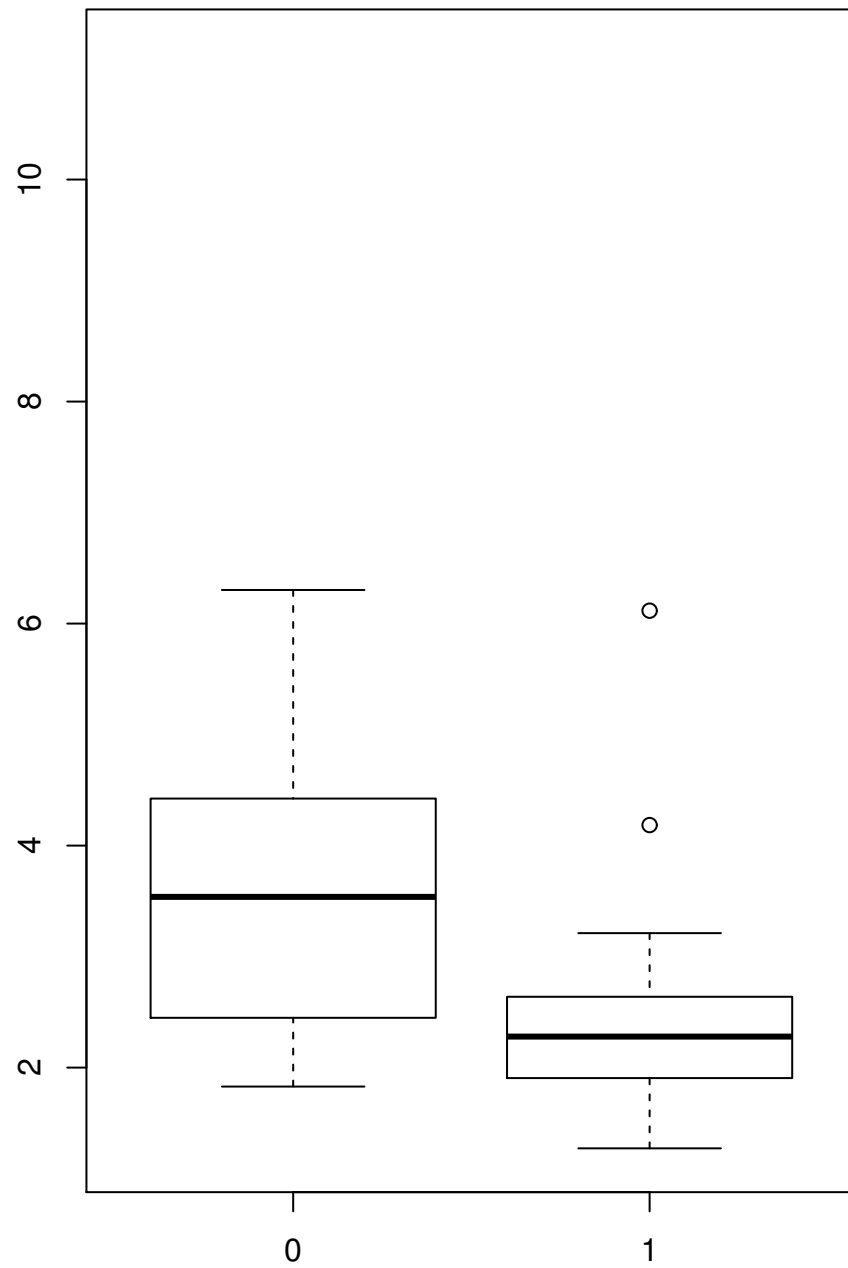

**hsa-miR-200c  
(GSE67139)**

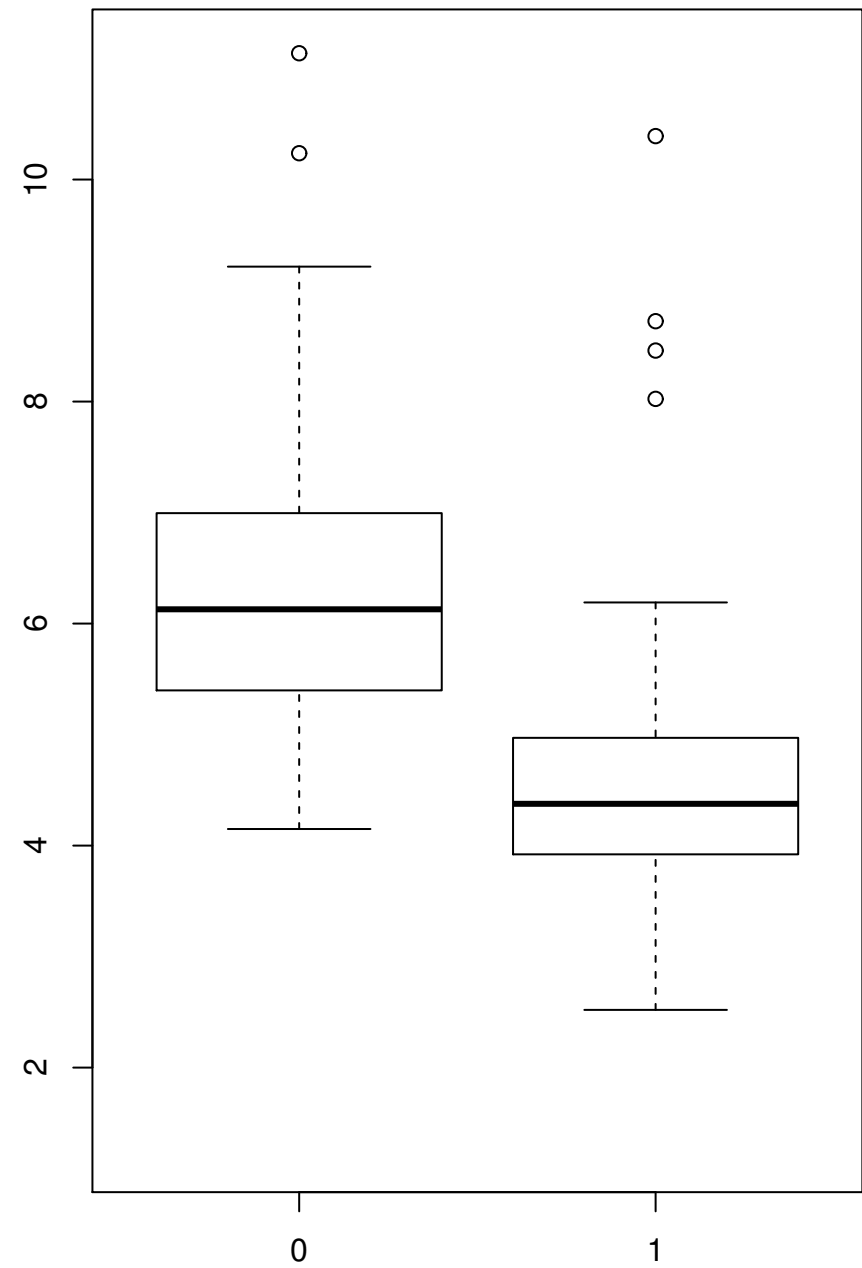

**hsa-miR-203  
(GSE67138)**

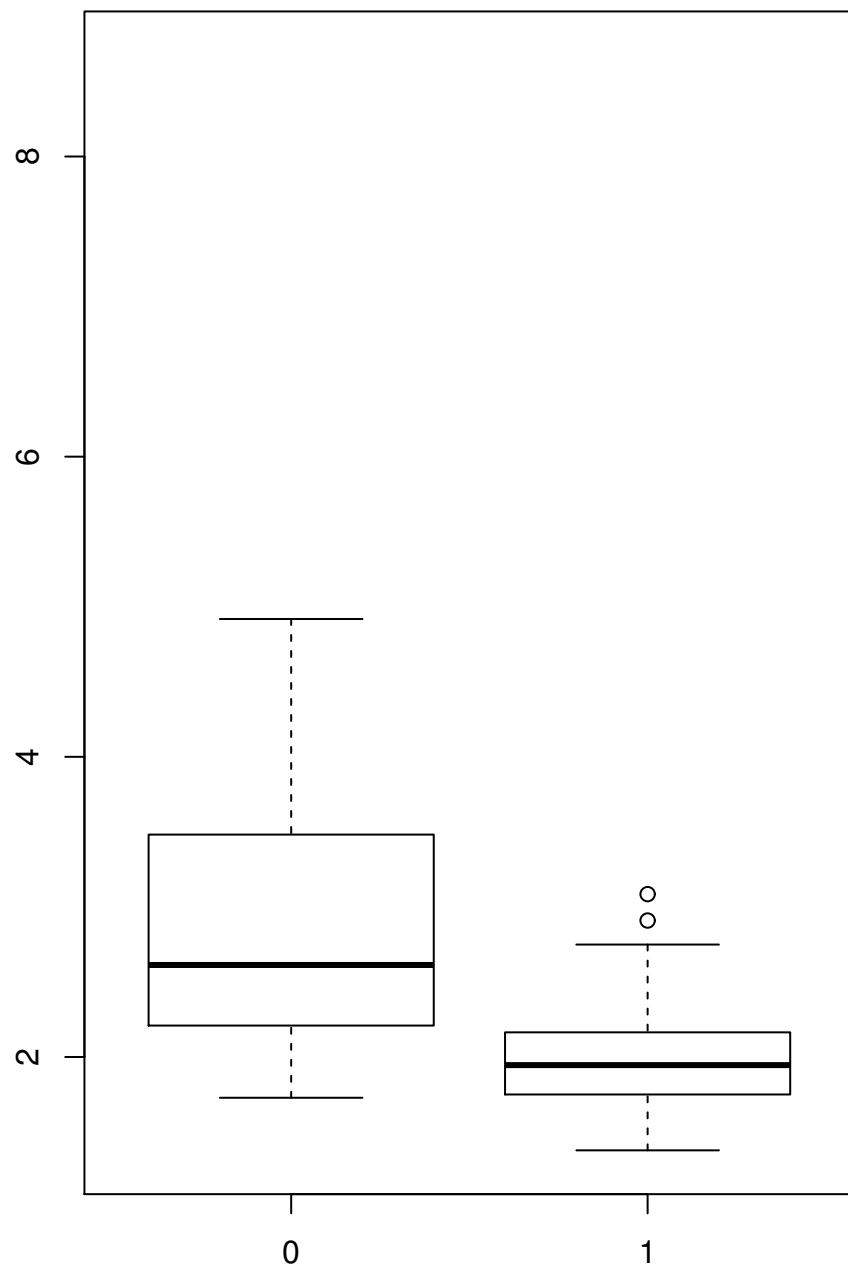

**hsa-miR-203  
(GSE67139)**

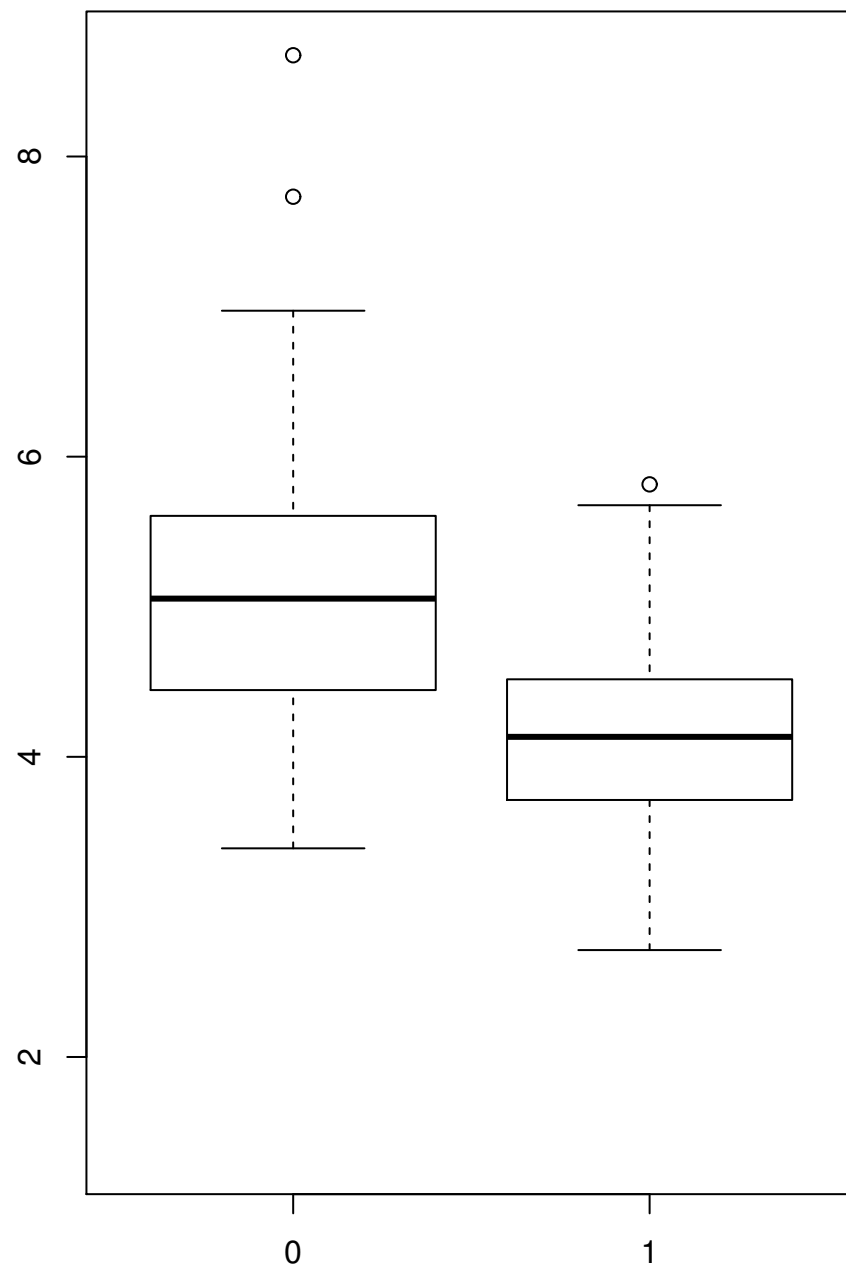

**hsa-miR-20b  
(GSE67138)**

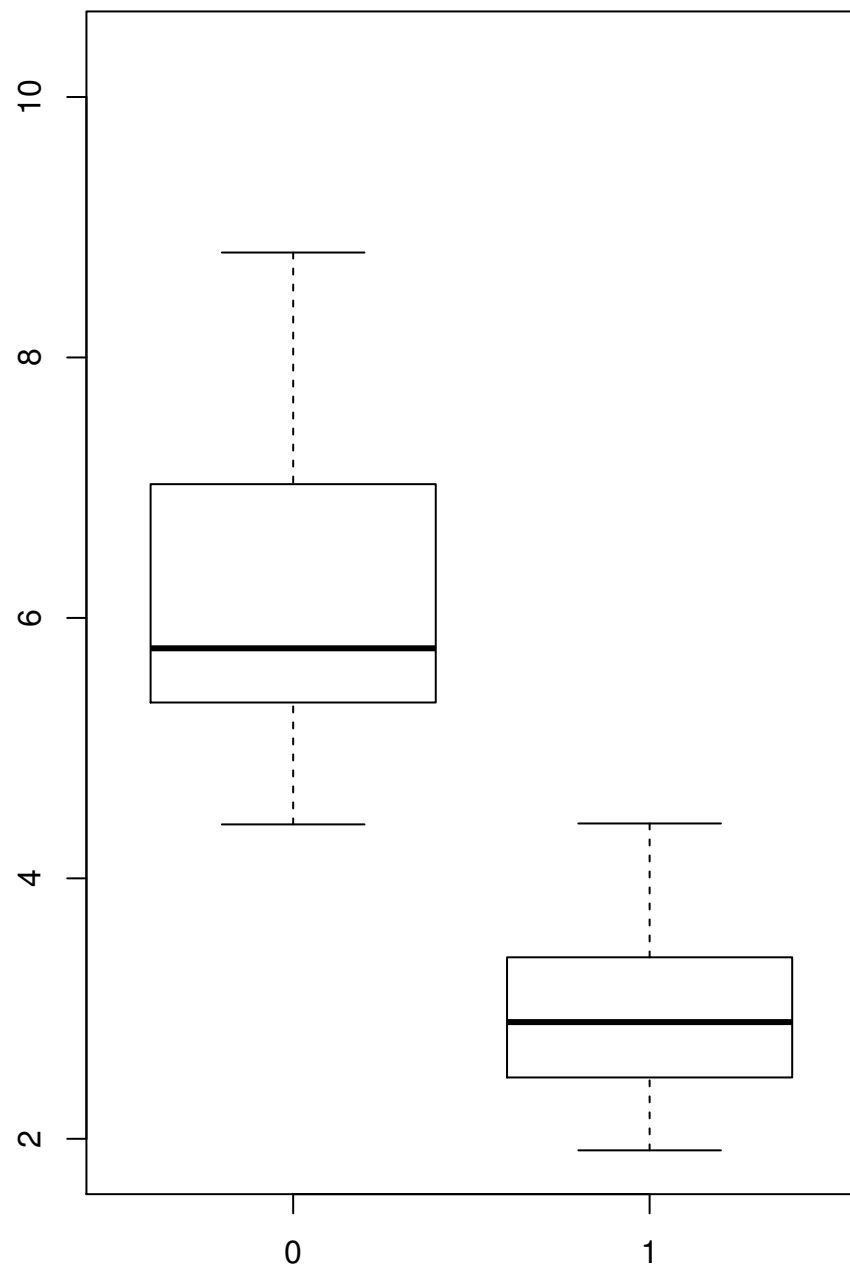

**hsa-miR-20b  
(GSE67139)**

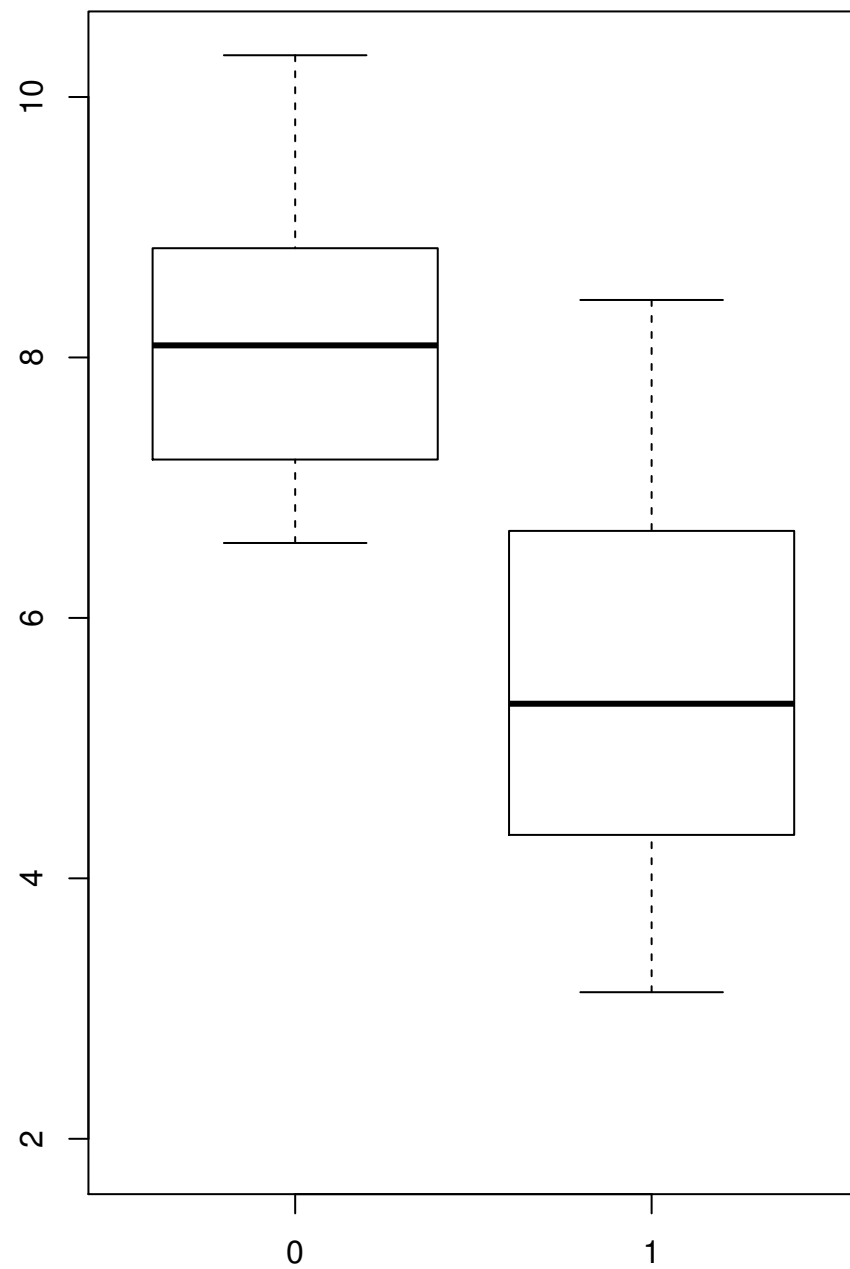

**hsa-miR-21-star  
(GSE67138)**

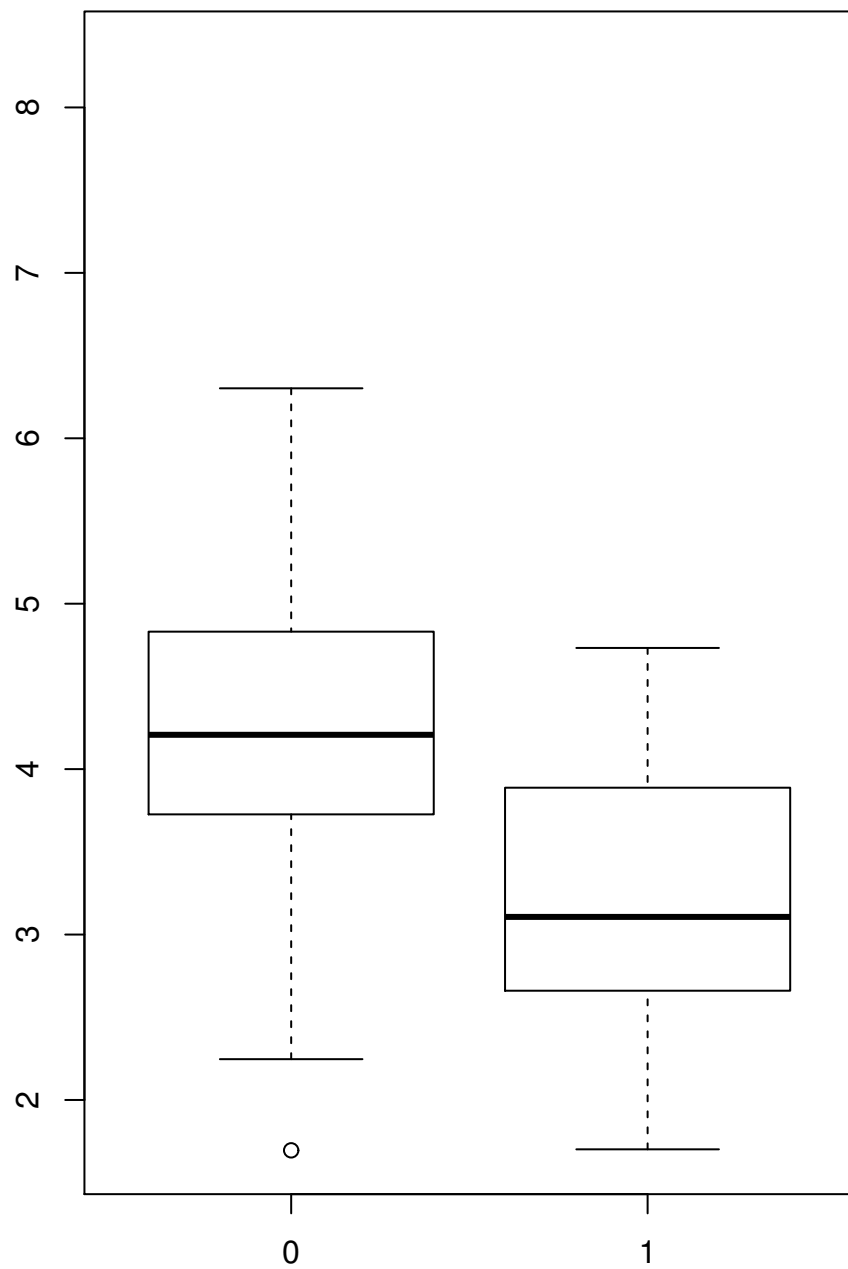

**hsa-miR-21-star  
(GSE67139)**

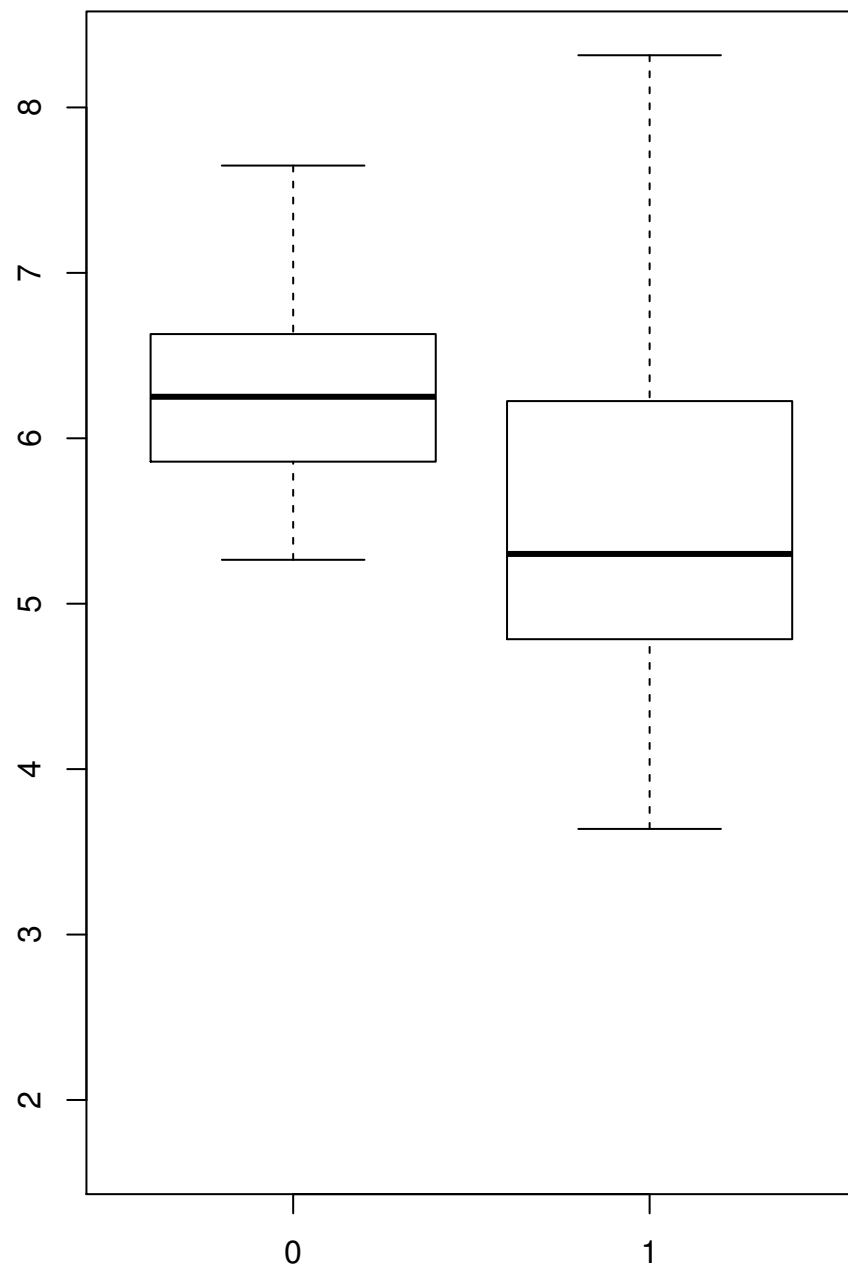

**hsa-miR-210  
(GSE67138)**

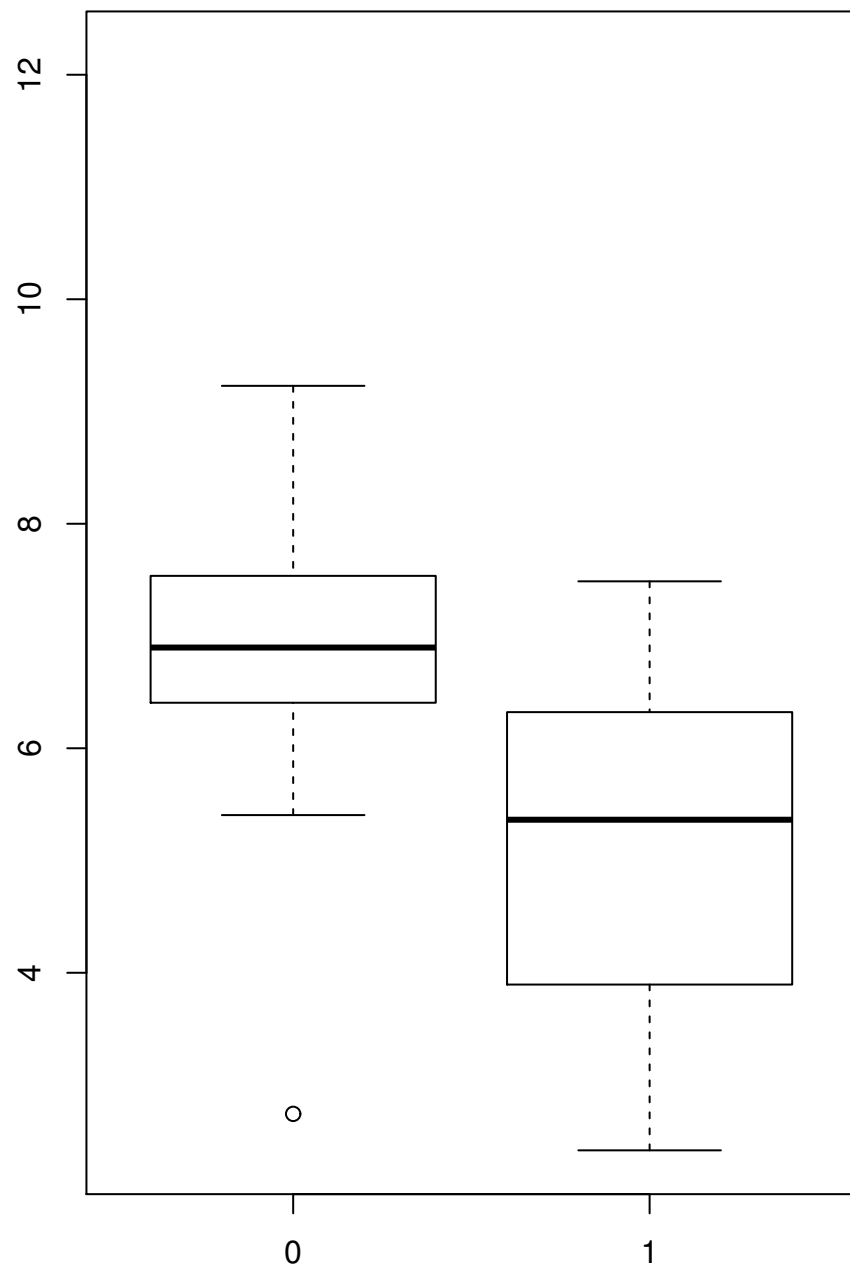

**hsa-miR-210  
(GSE67139)**

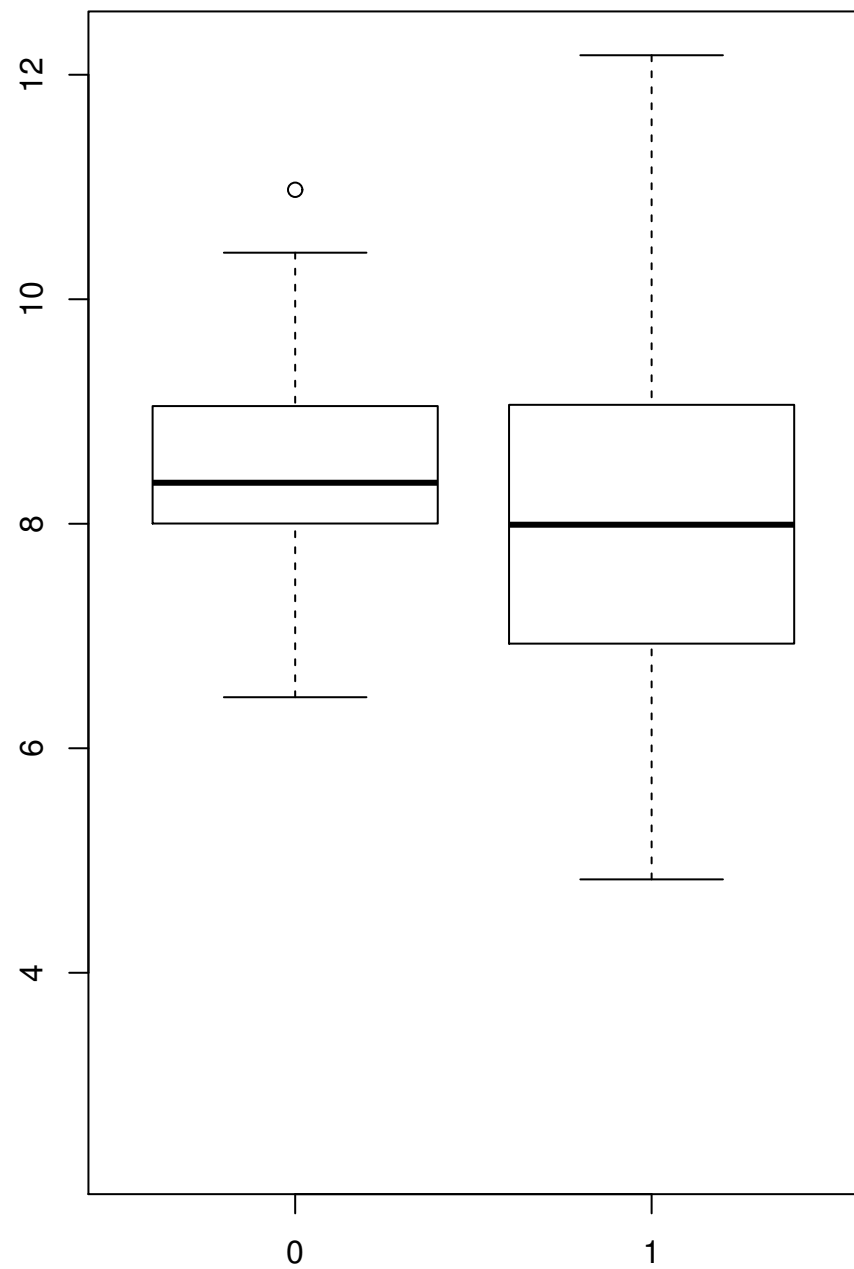

**hsa-miR-214-star**  
**(GSE67138)**

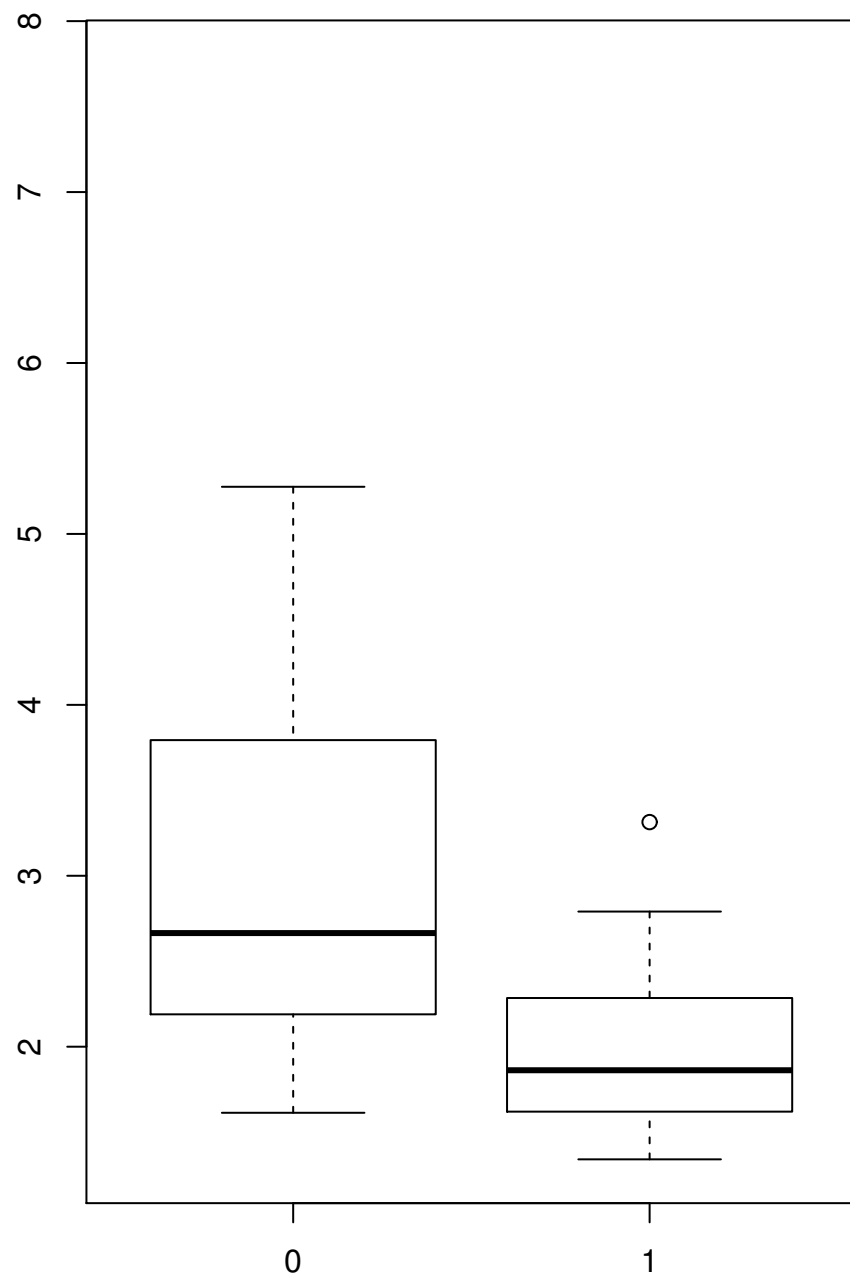

**hsa-miR-214-star**  
**(GSE67139)**

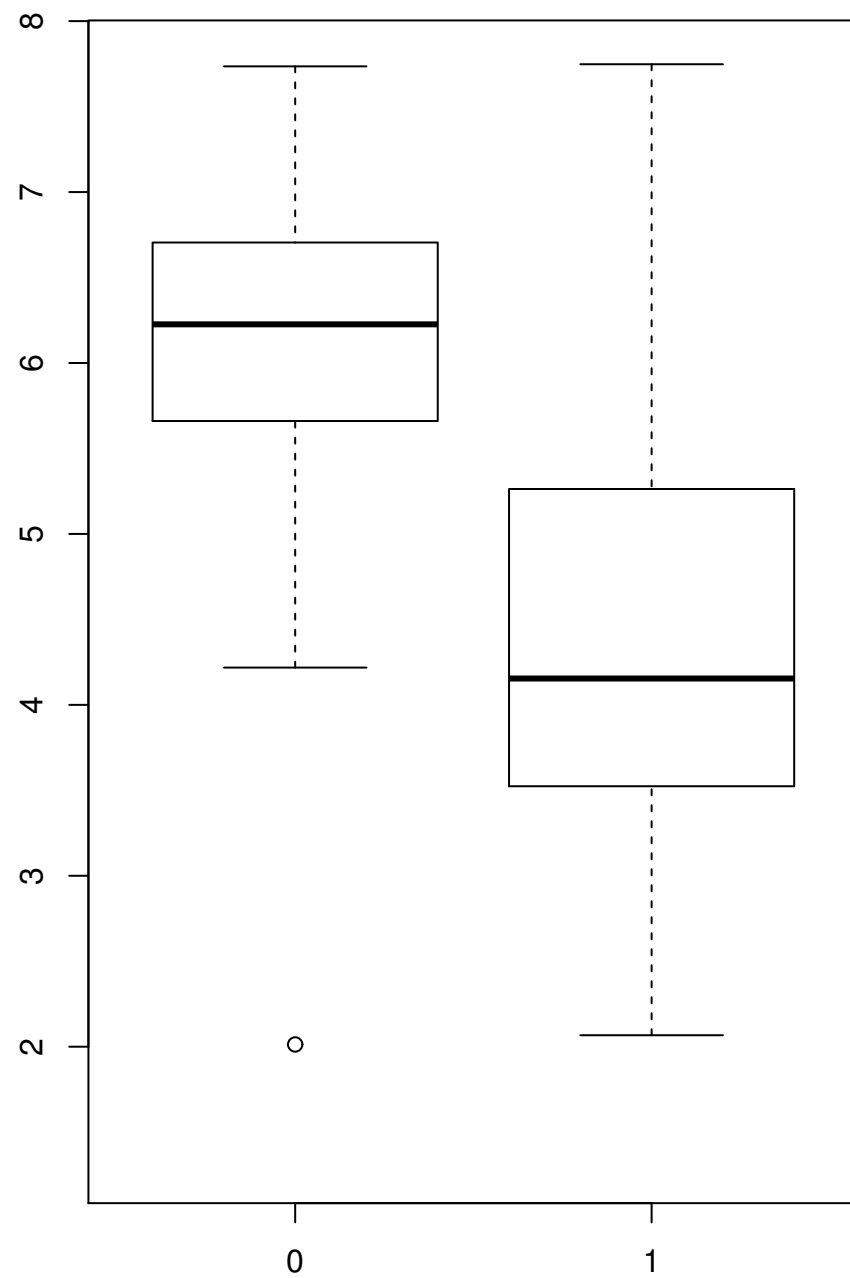



**hsa-miR-214  
(GSE67138)**

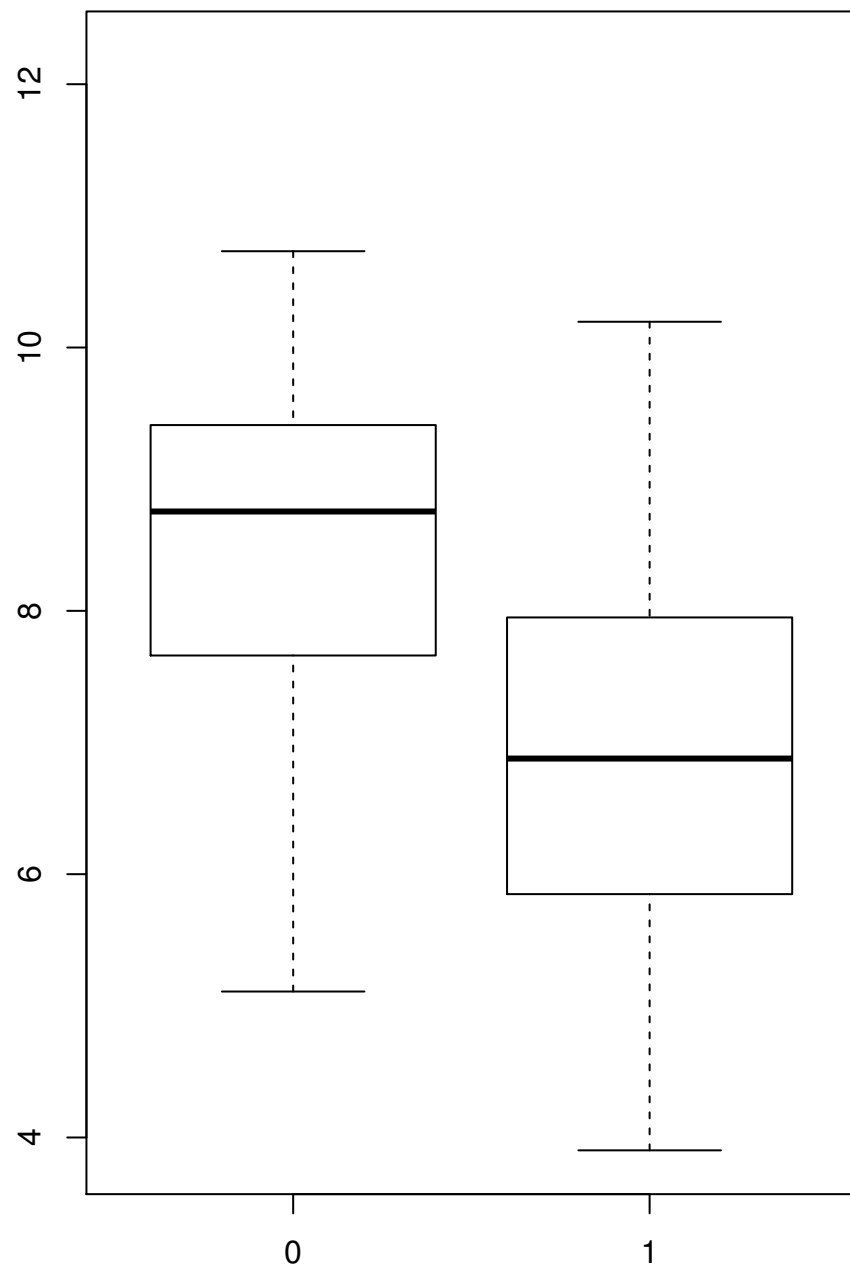

**hsa-miR-214  
(GSE67139)**

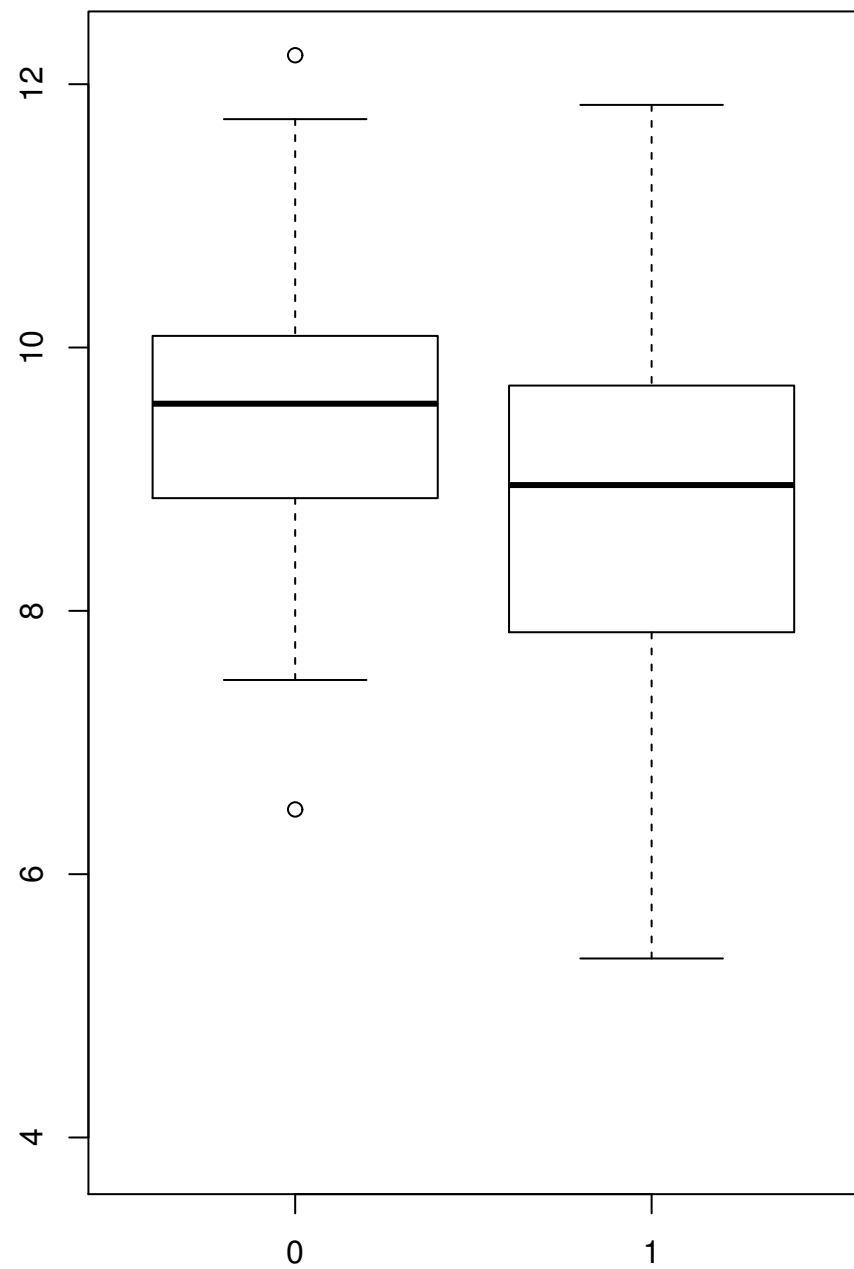

**hsa-miR-217  
(GSE67138)**

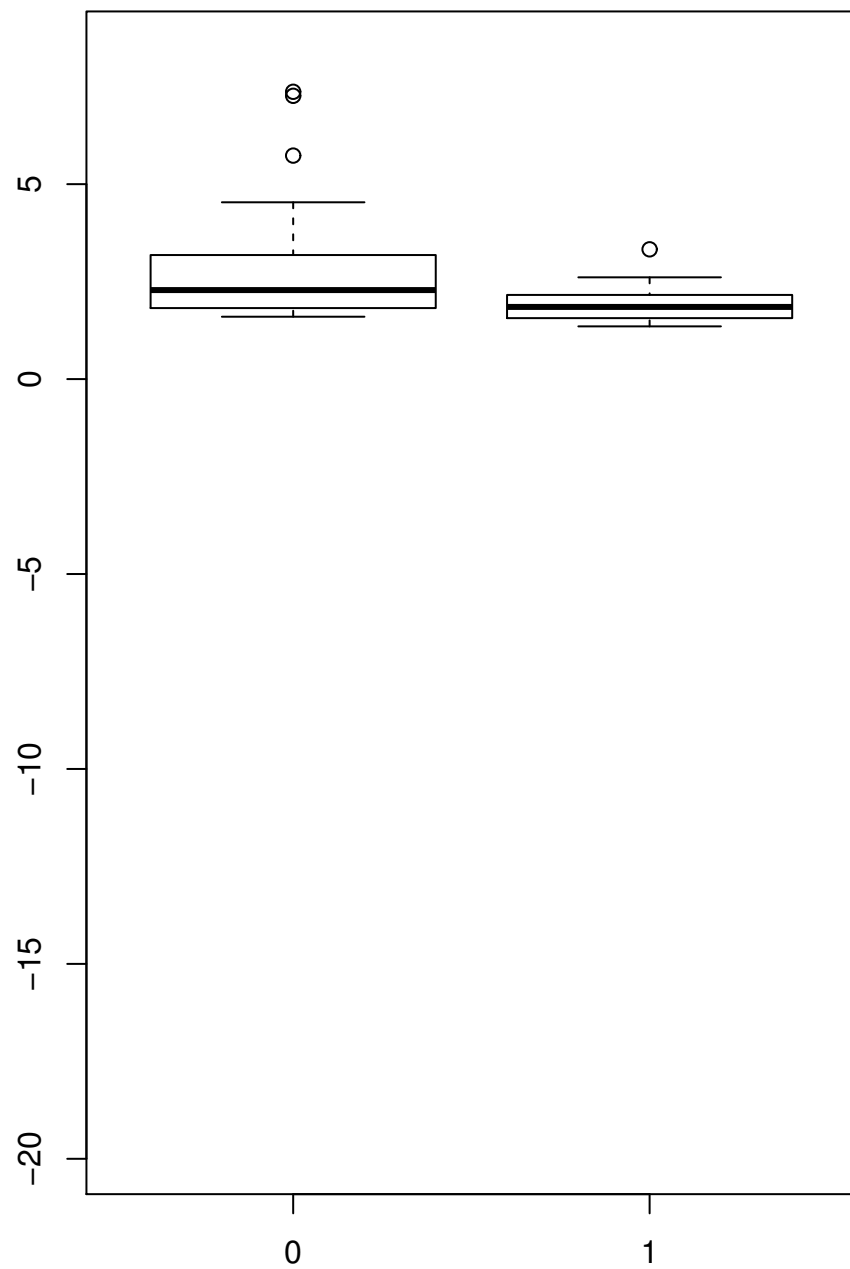

**hsa-miR-217  
(GSE67139)**

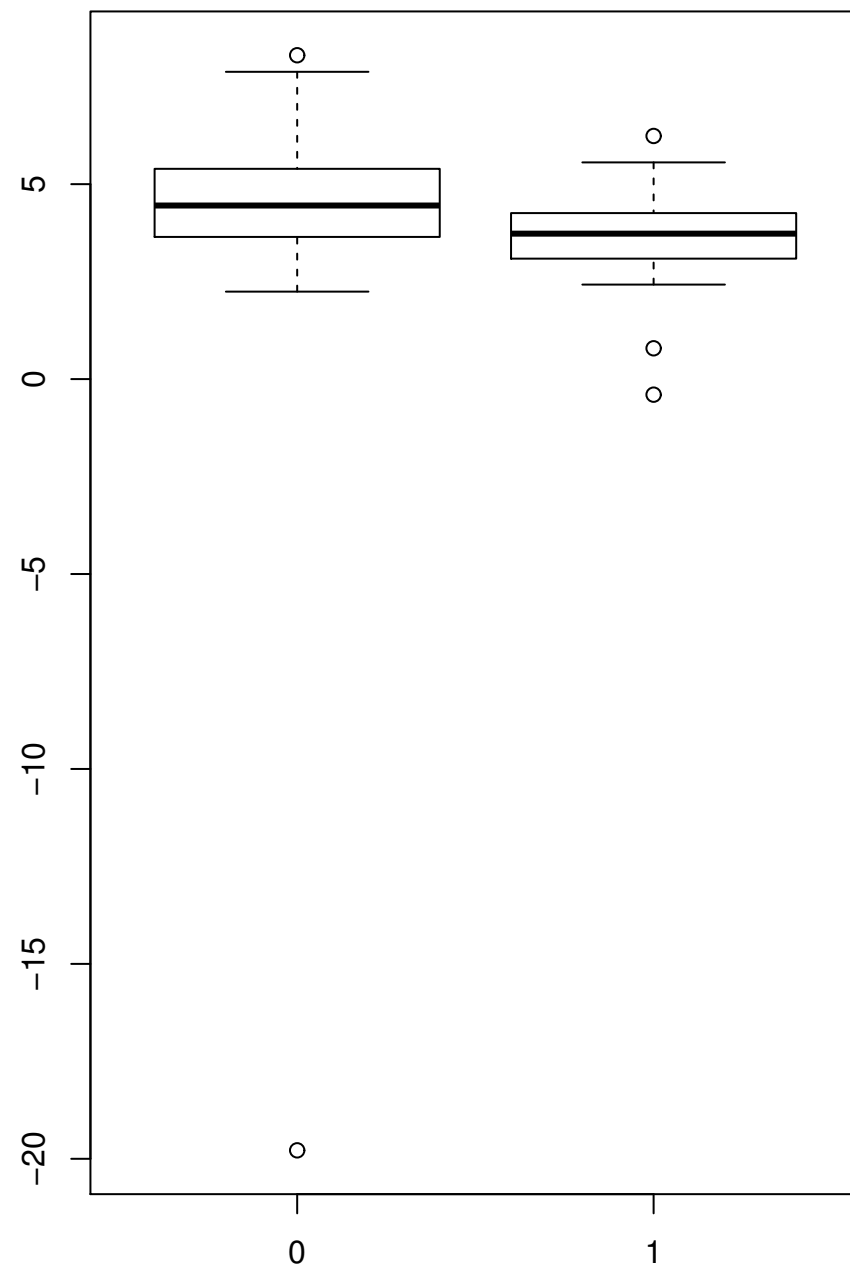

**hsa-miR-21  
(GSE67138)**

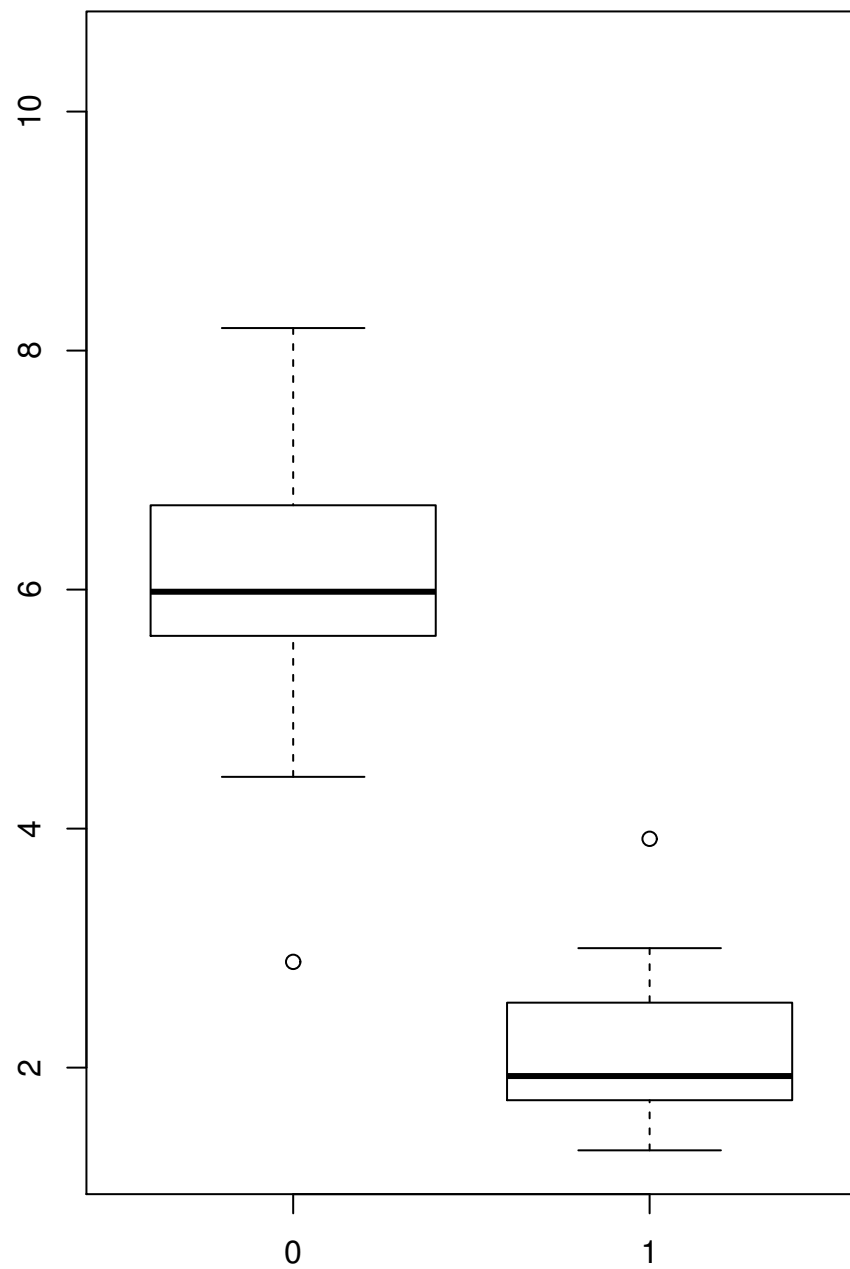

**hsa-miR-21  
(GSE67139)**

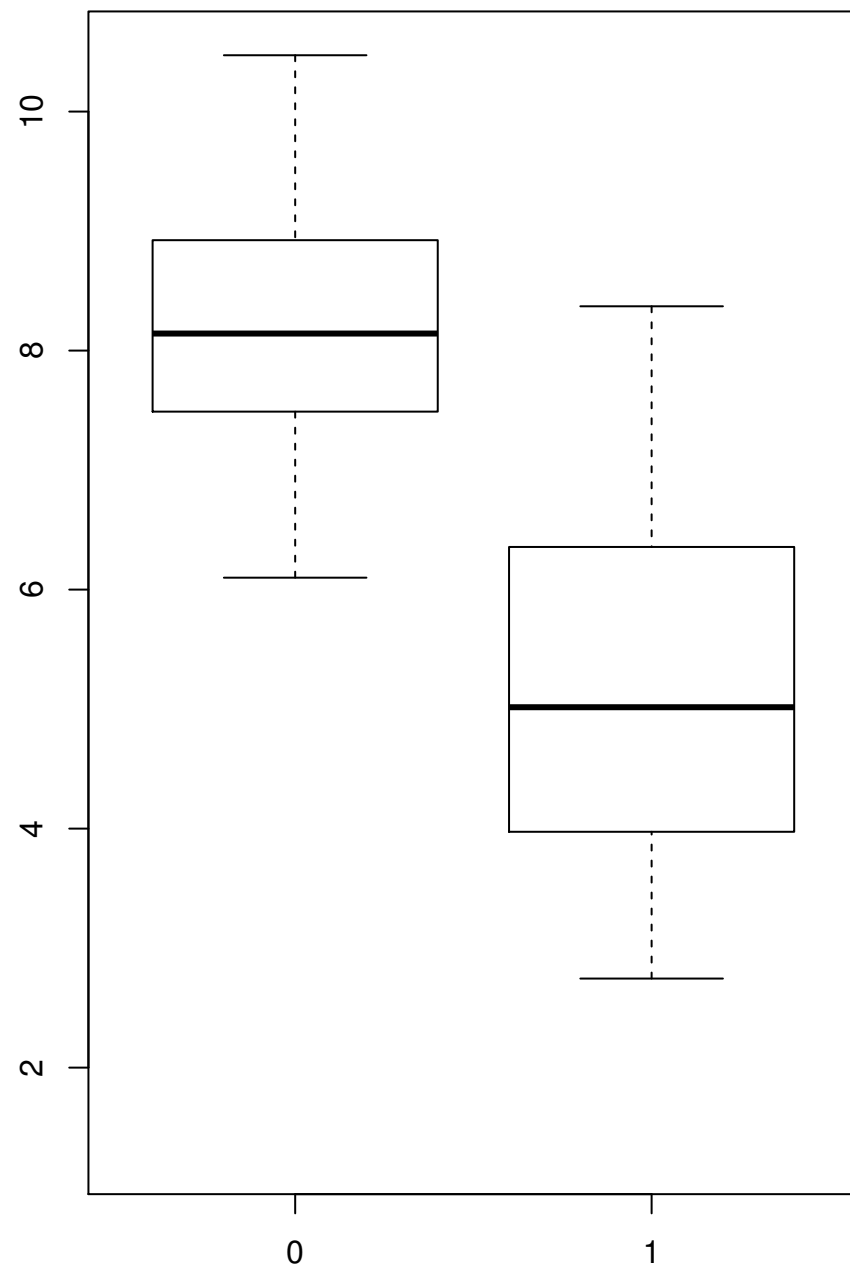

**hsa-miR-224  
(GSE67138)**

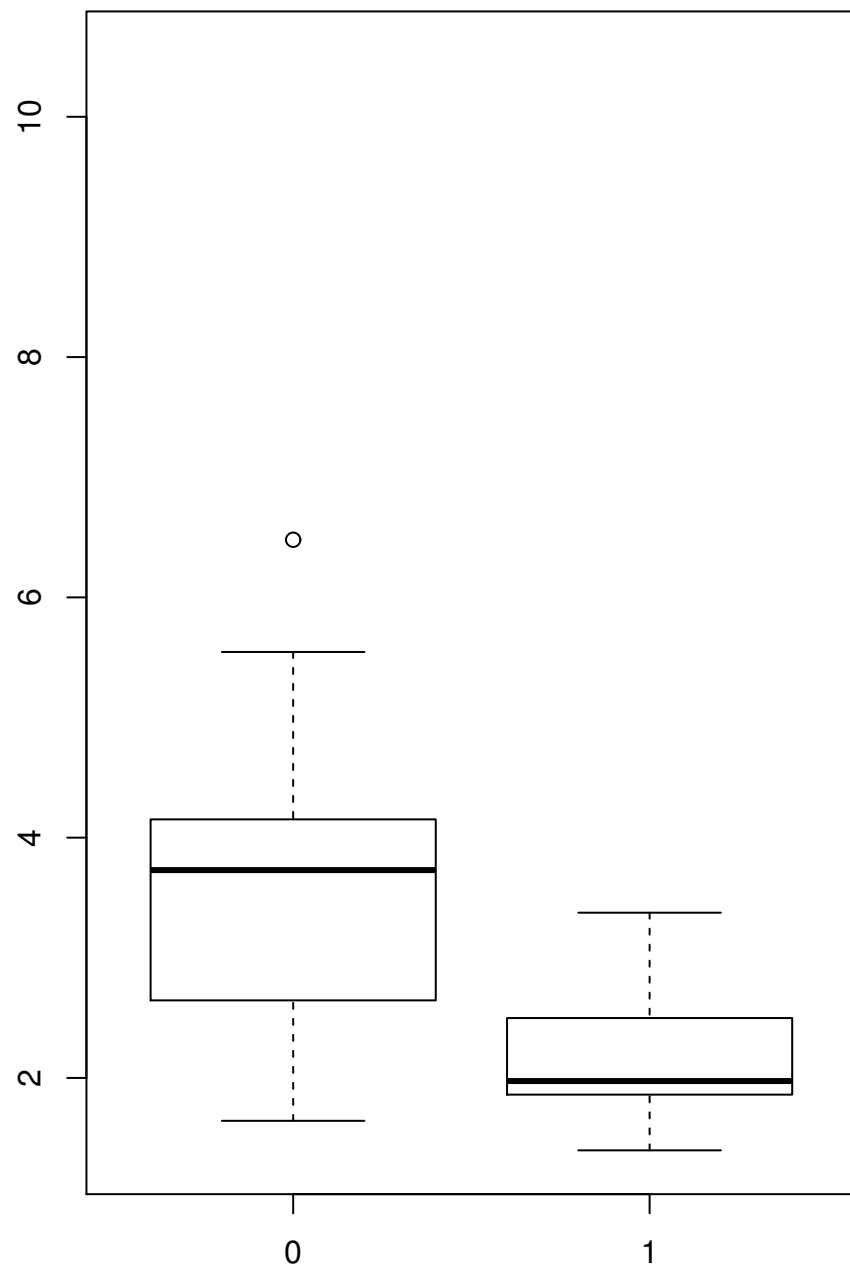

**hsa-miR-224  
(GSE67139)**

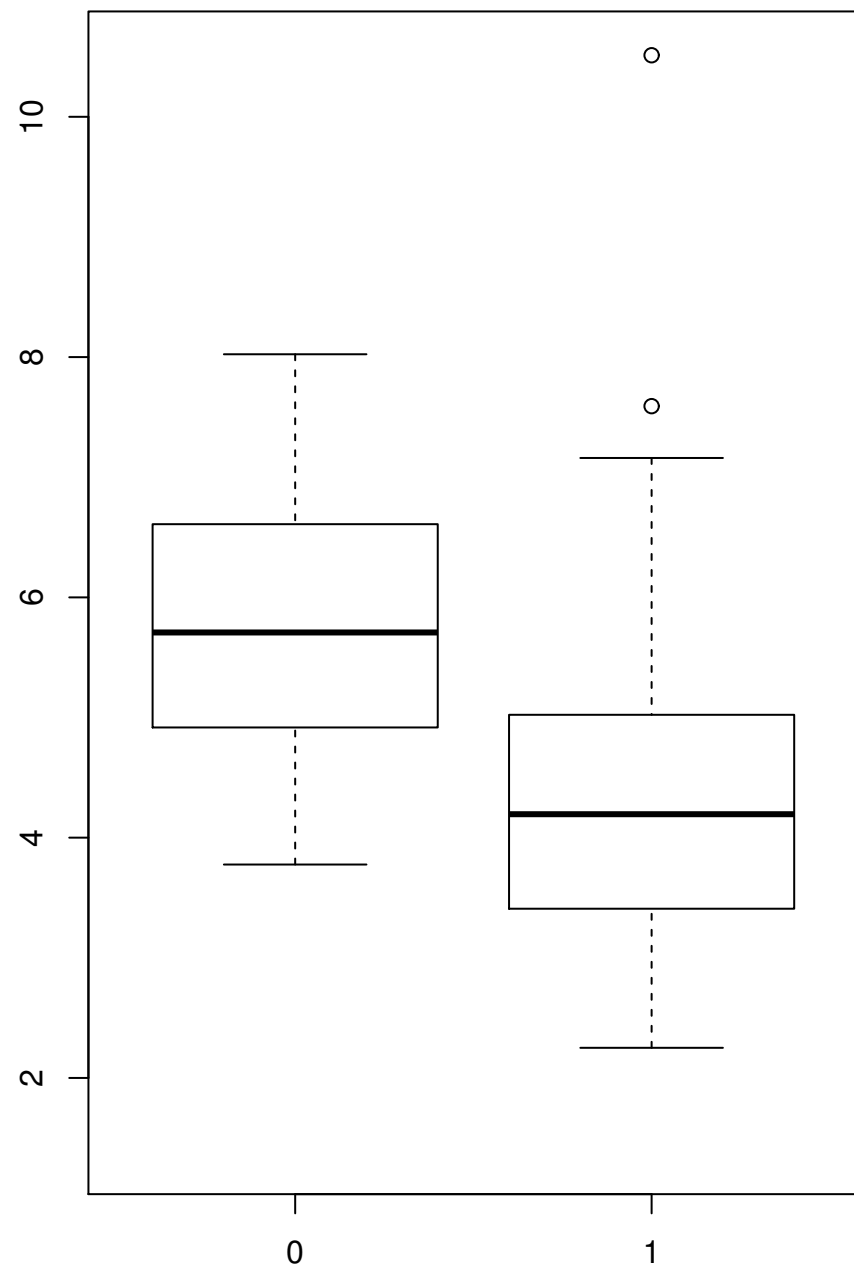

**hsa-miR-23b**  
**(GSE67138)**

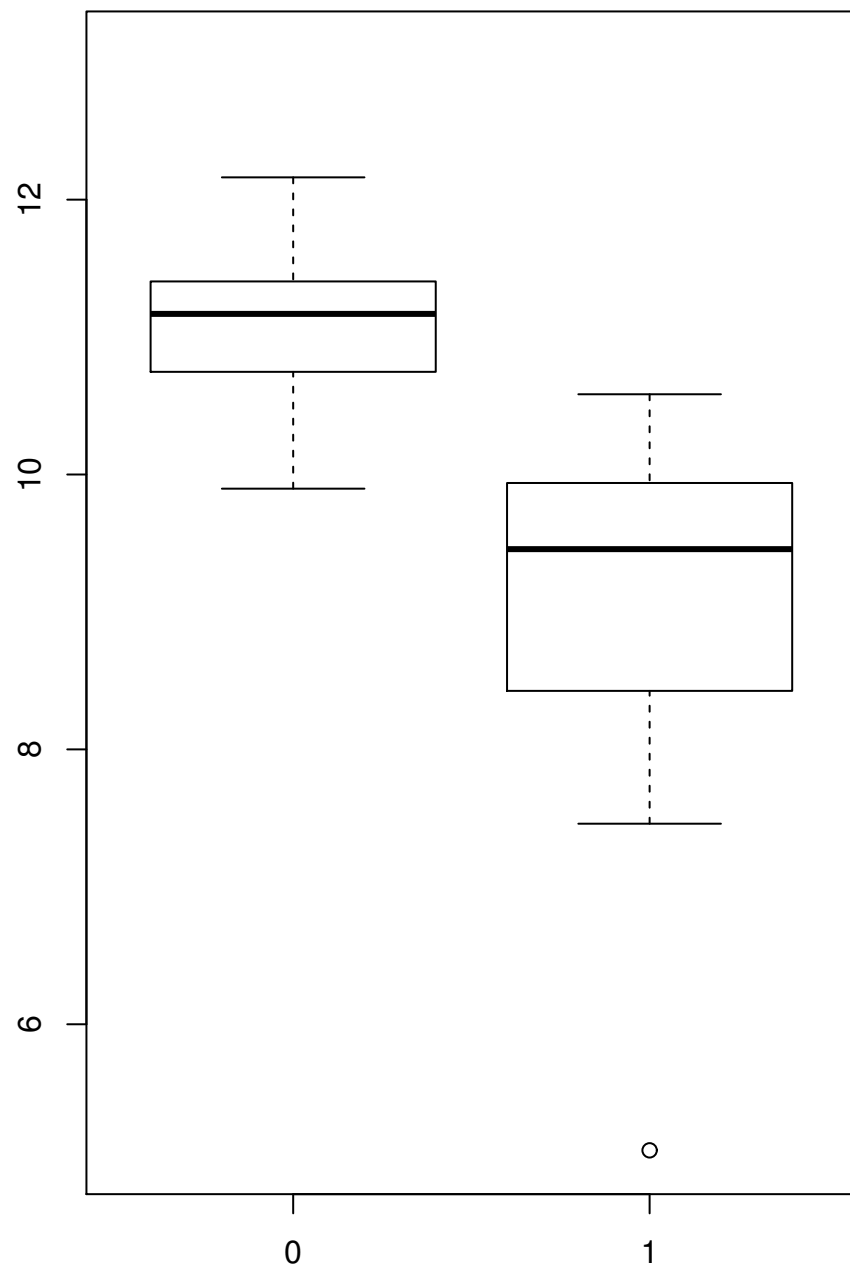

**hsa-miR-23b**  
**(GSE67139)**

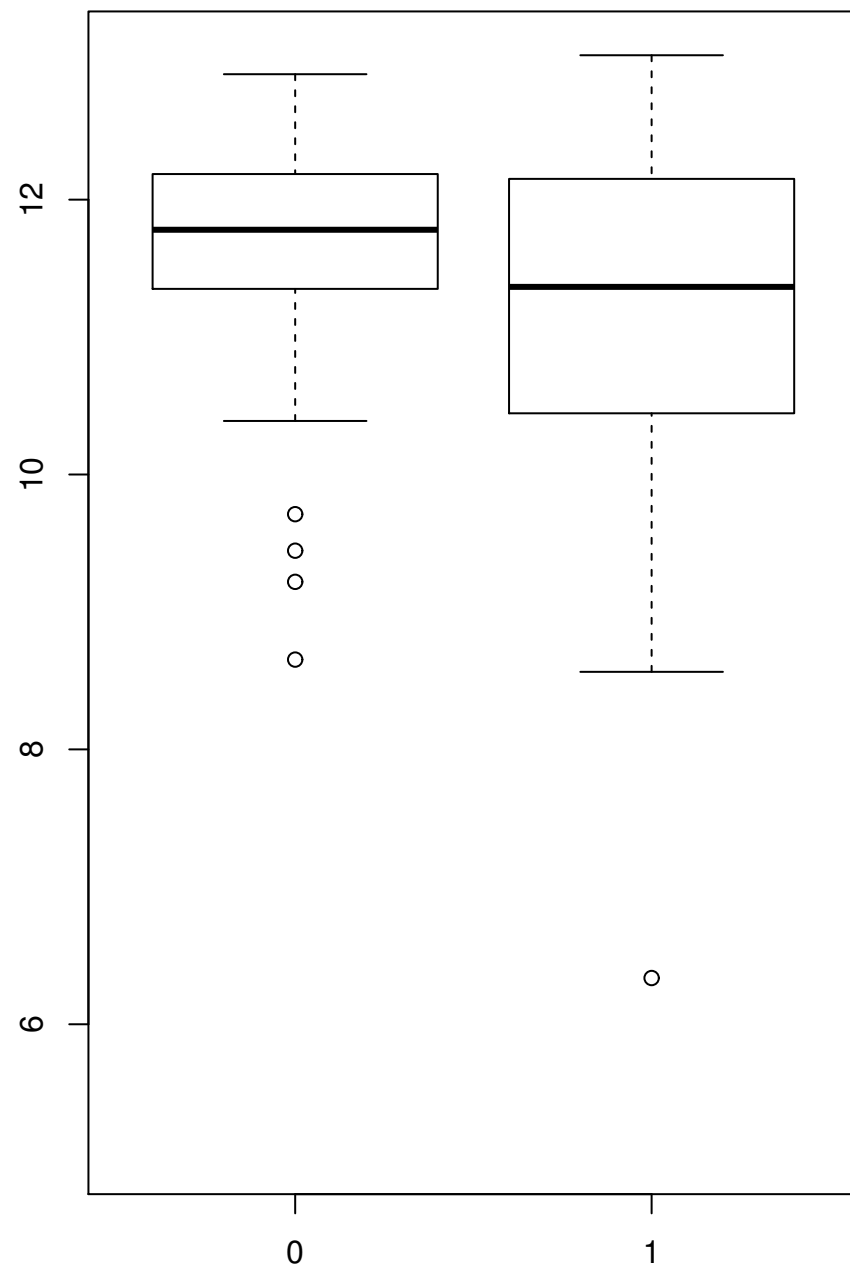

**hsa-miR-24-2-star**  
**(GSE67138)**

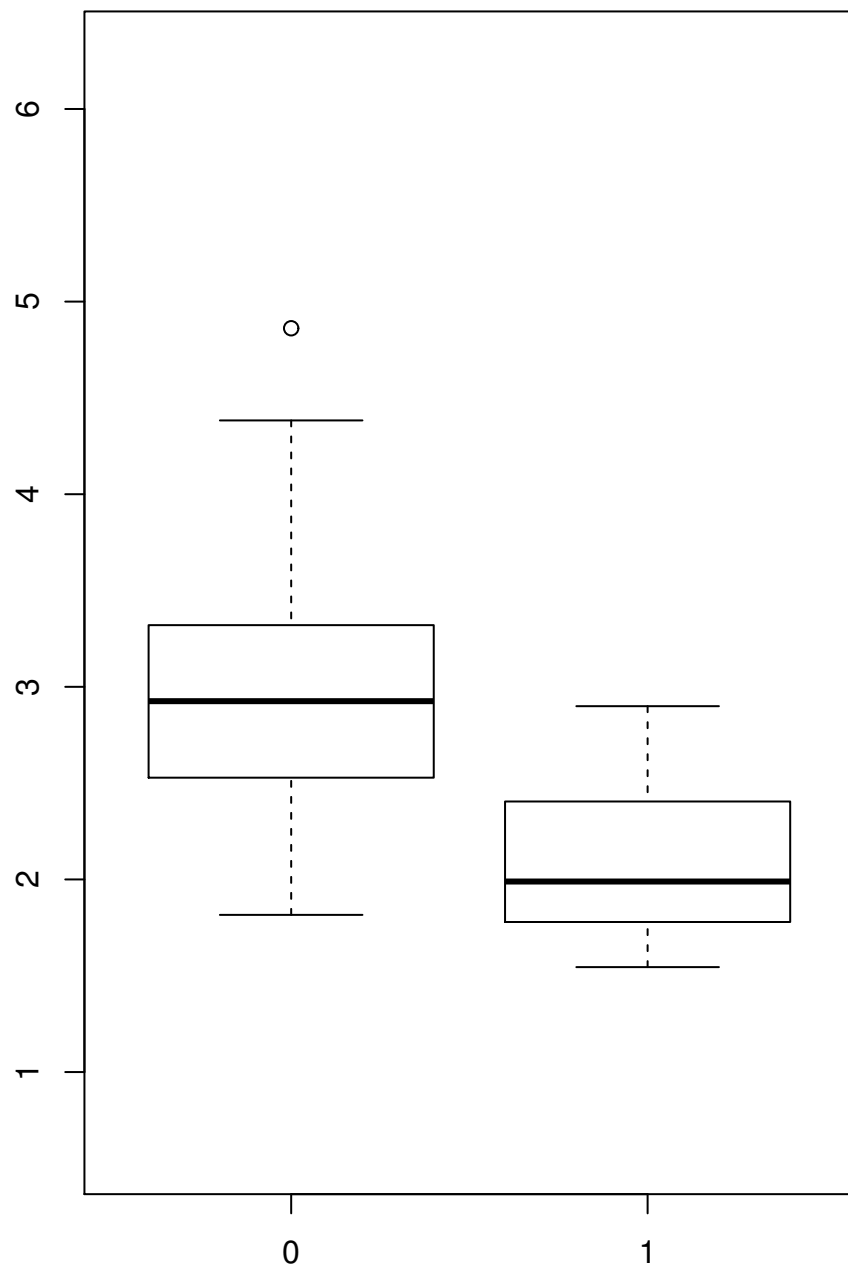

**hsa-miR-24-2-star**  
**(GSE67139)**

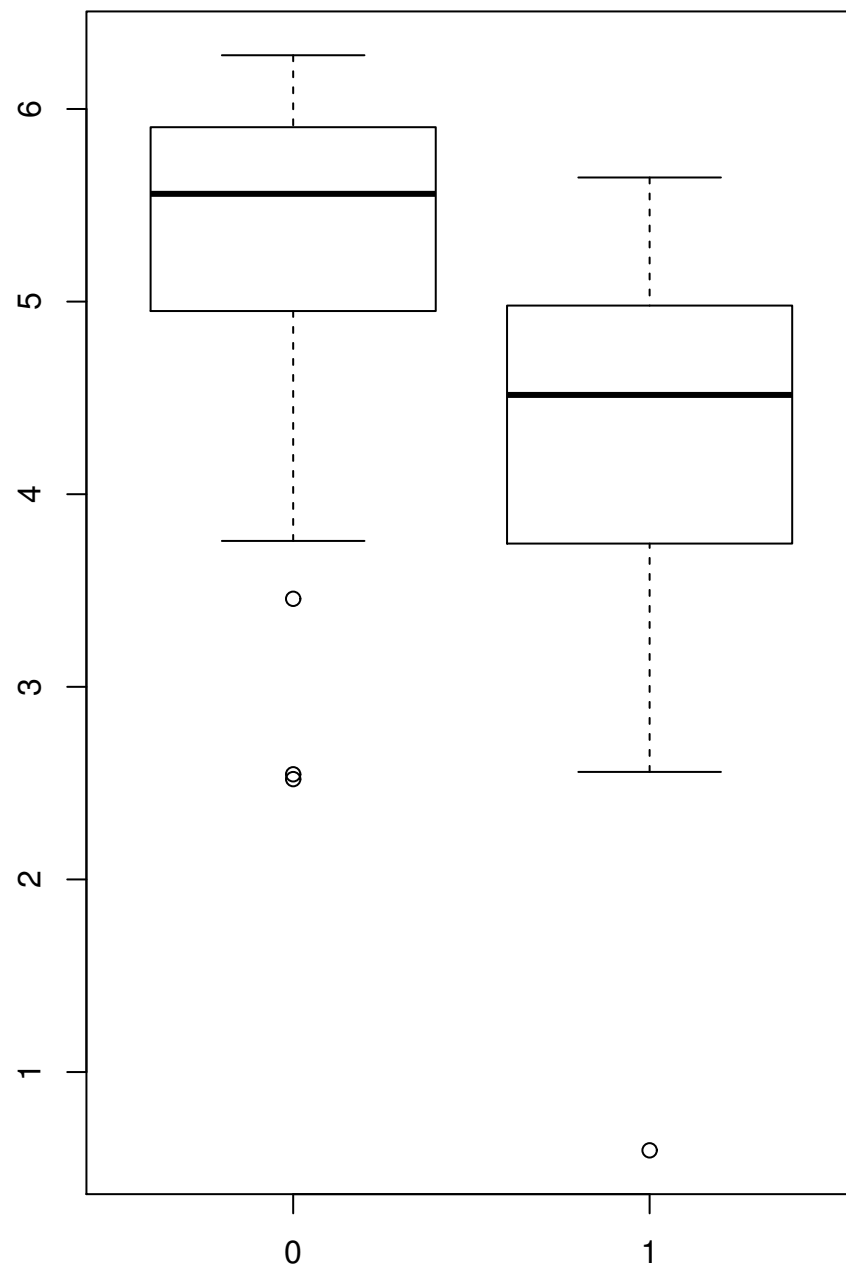

**hsa-miR-25-star  
(GSE67138)**

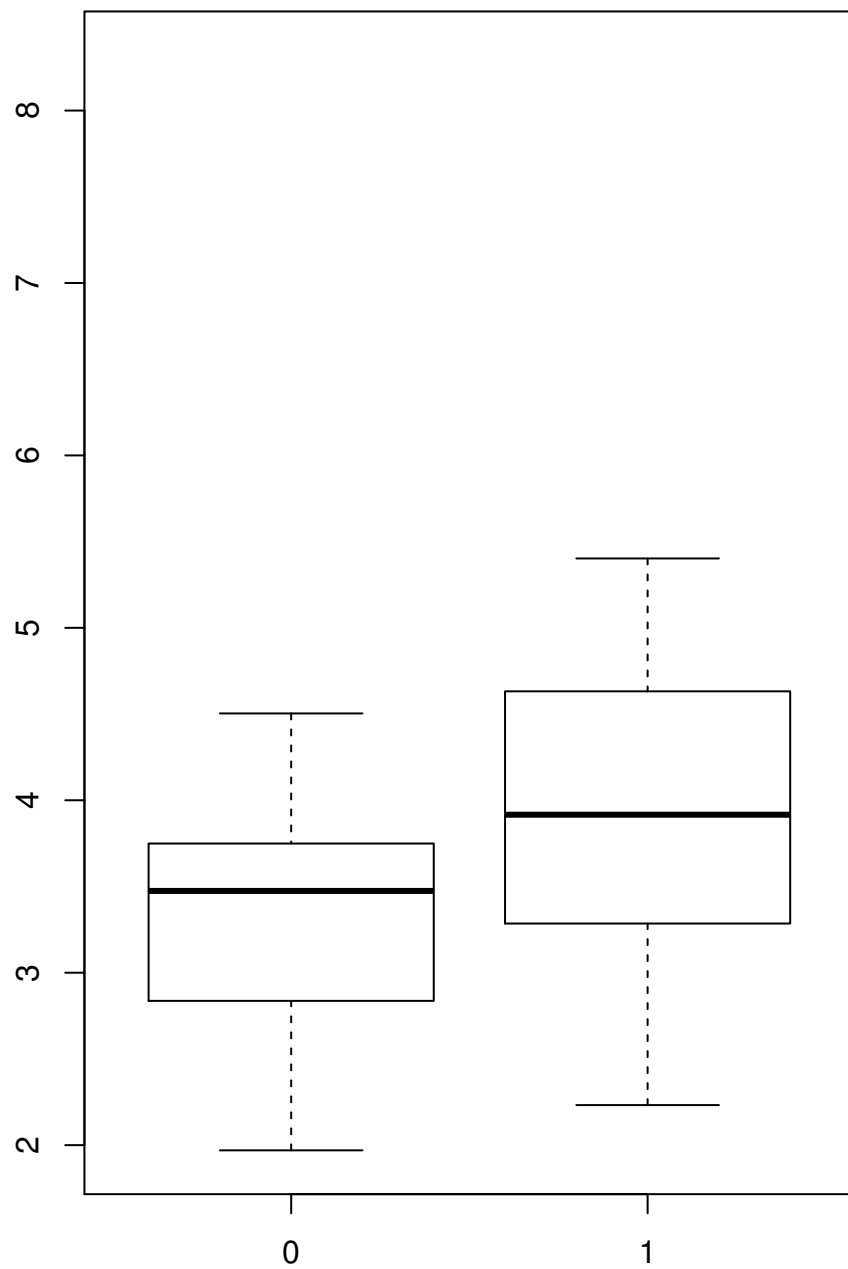

**hsa-miR-25-star  
(GSE67139)**

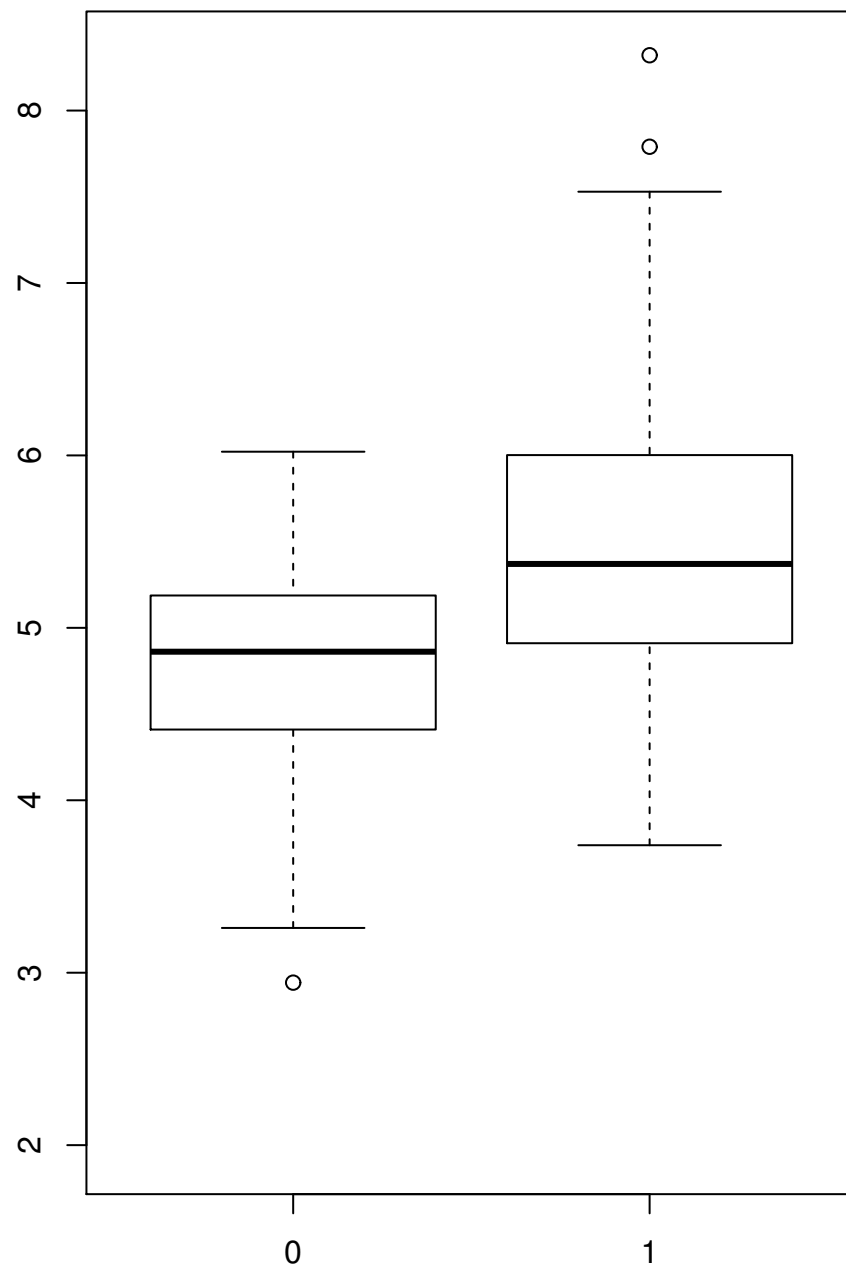

**hsa-miR-26b  
(GSE67138)**

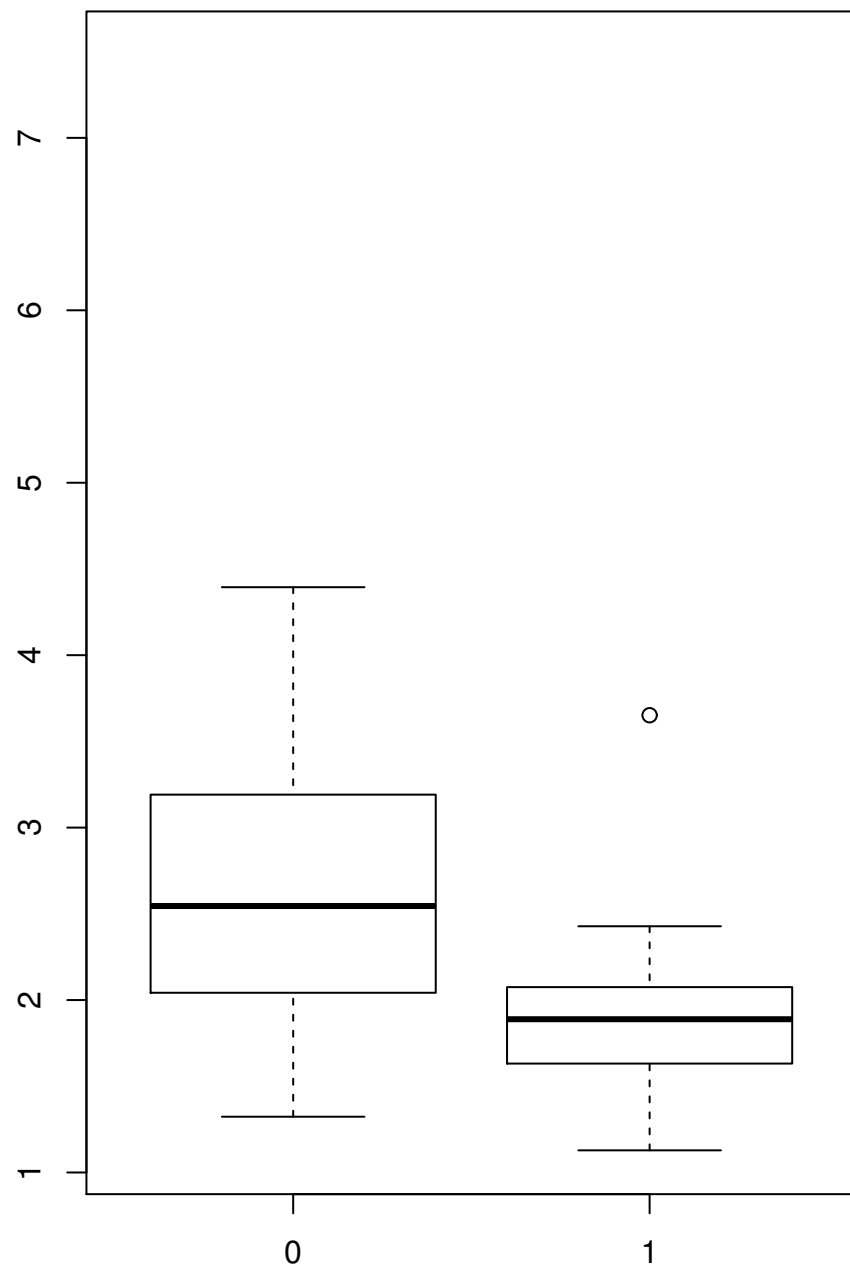

**hsa-miR-26b  
(GSE67139)**

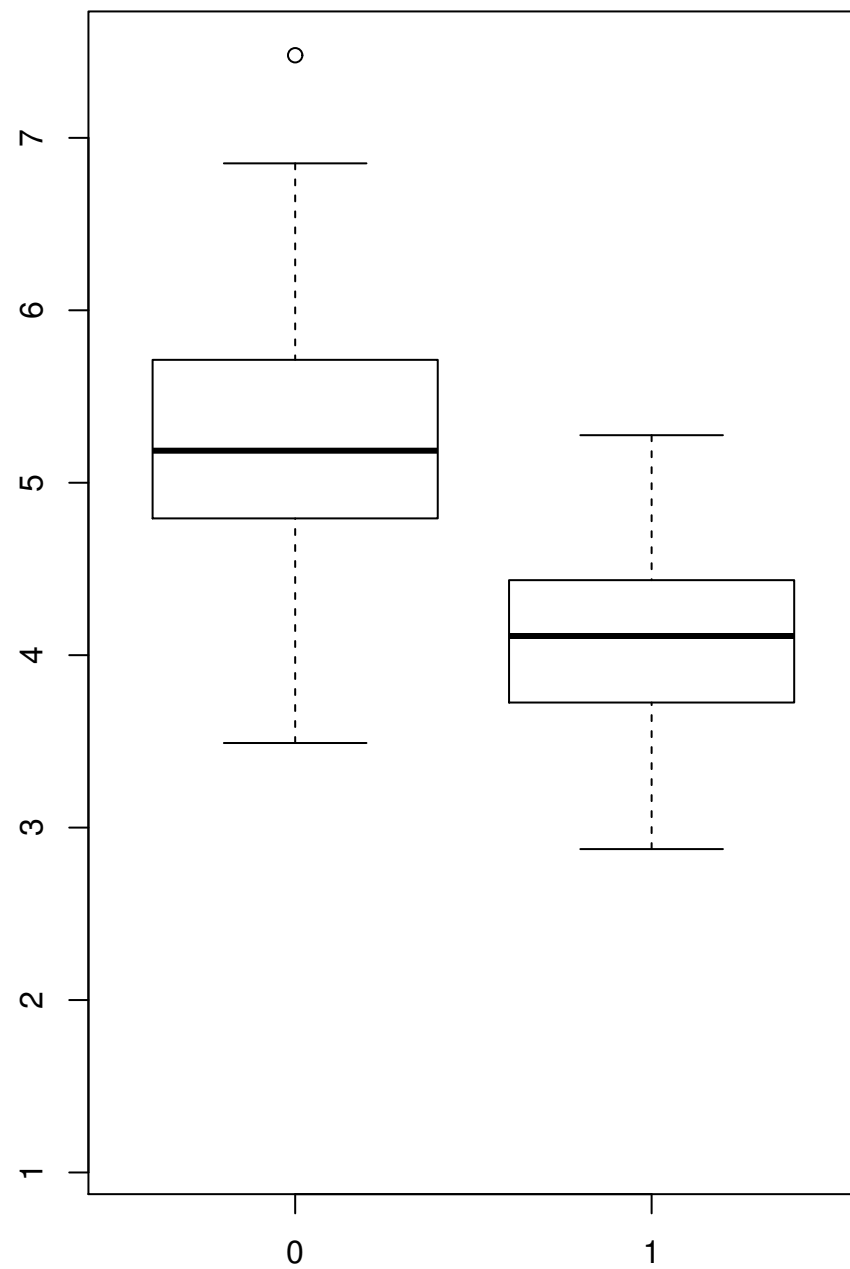



**hsa-miR-27b-star**  
**(GSE67138)**

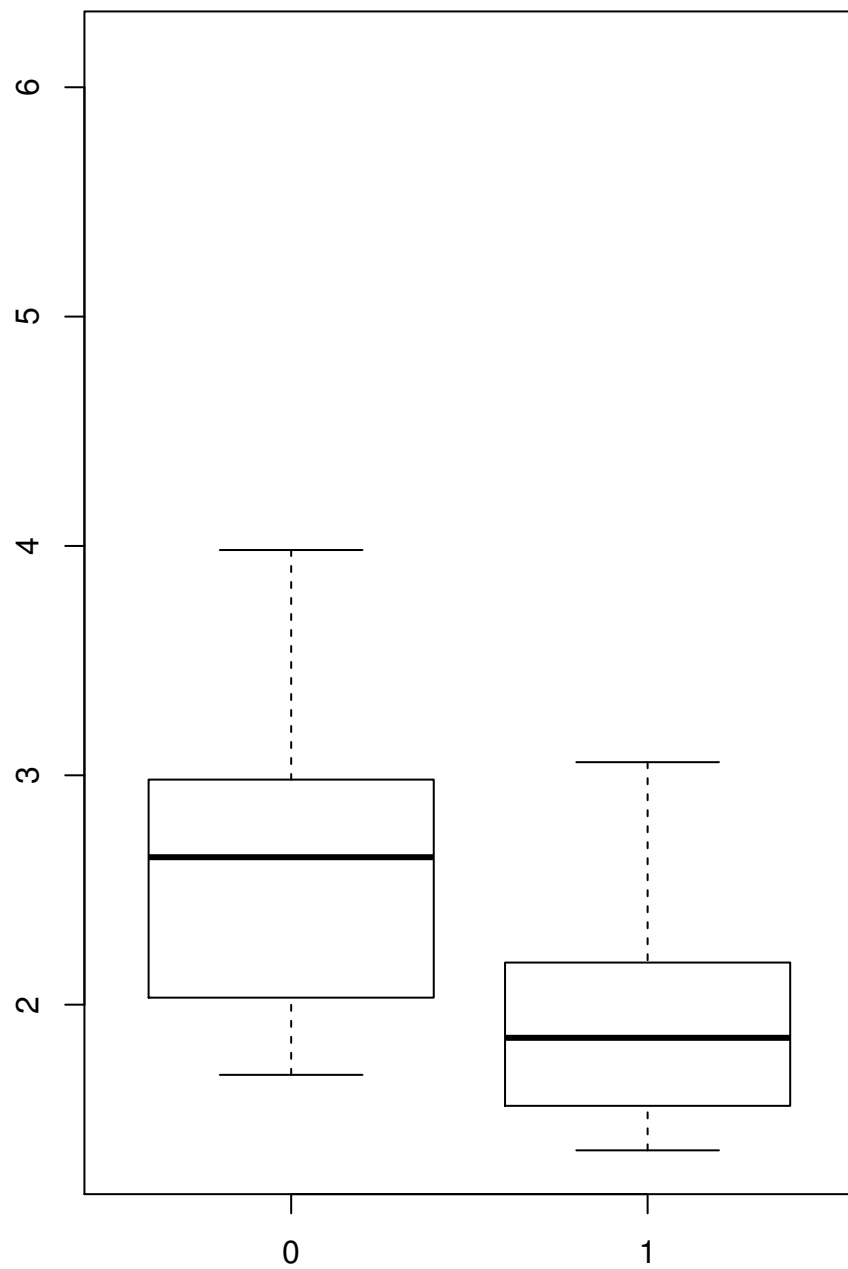

**hsa-miR-27b-star**  
**(GSE67139)**

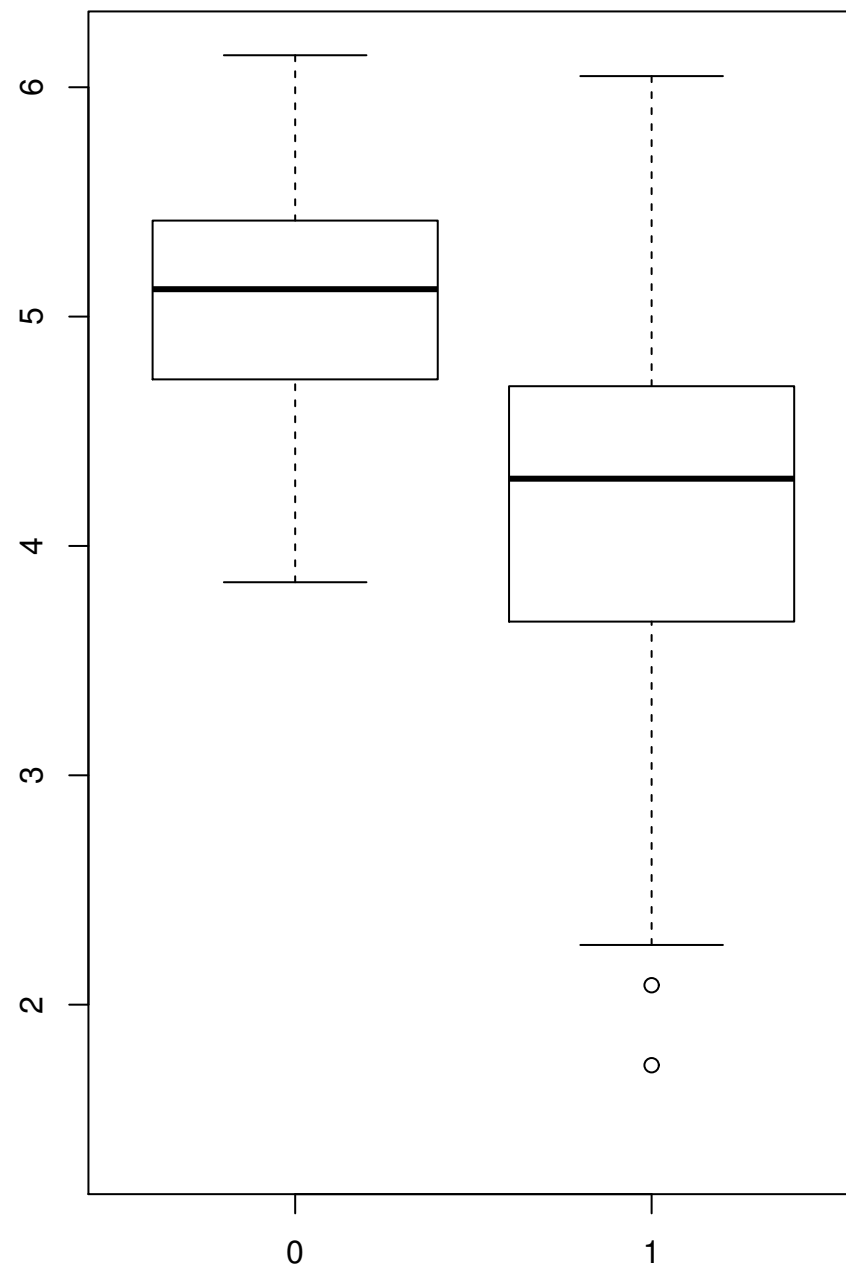

**hsa-miR-28-5p  
(GSE67138)**

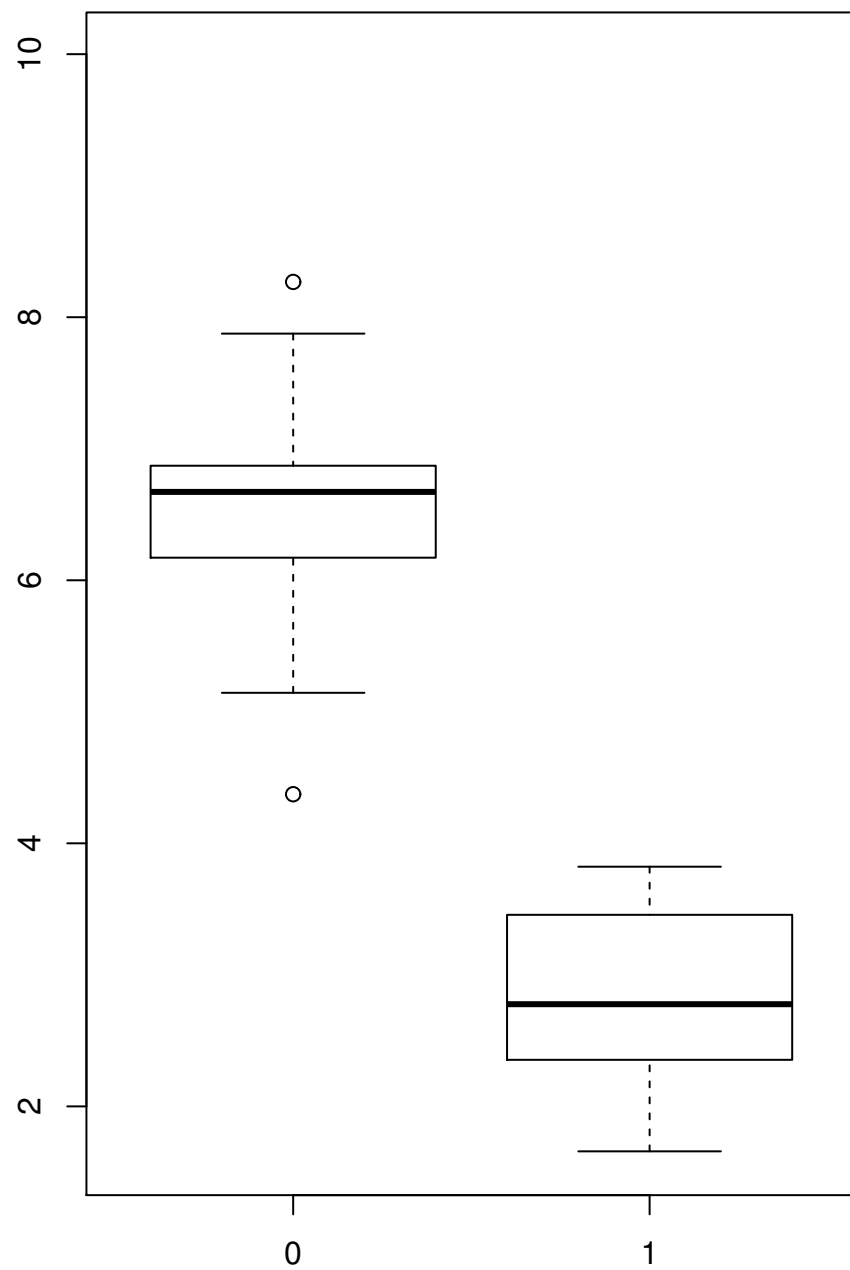

**hsa-miR-28-5p  
(GSE67139)**

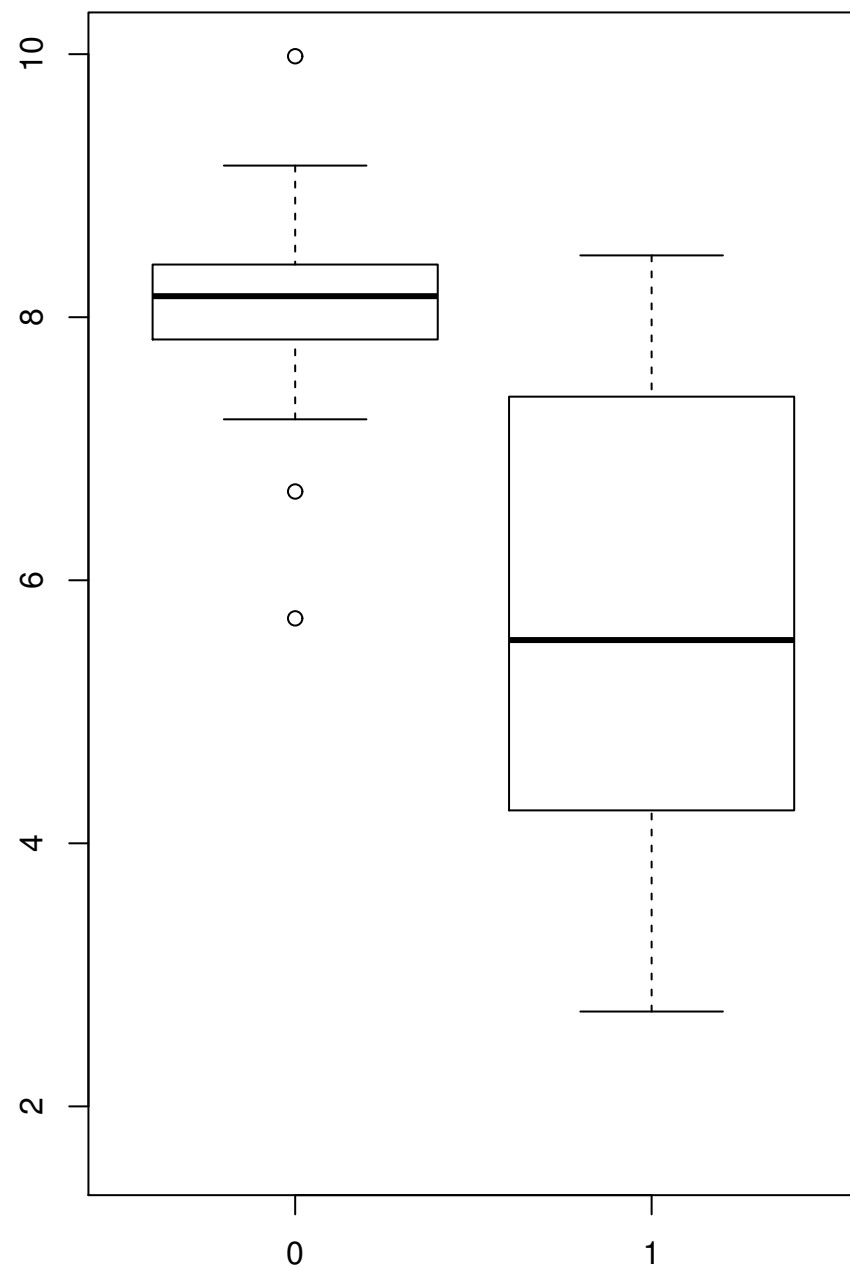

**hsa-miR-296-3p  
(GSE67138)**

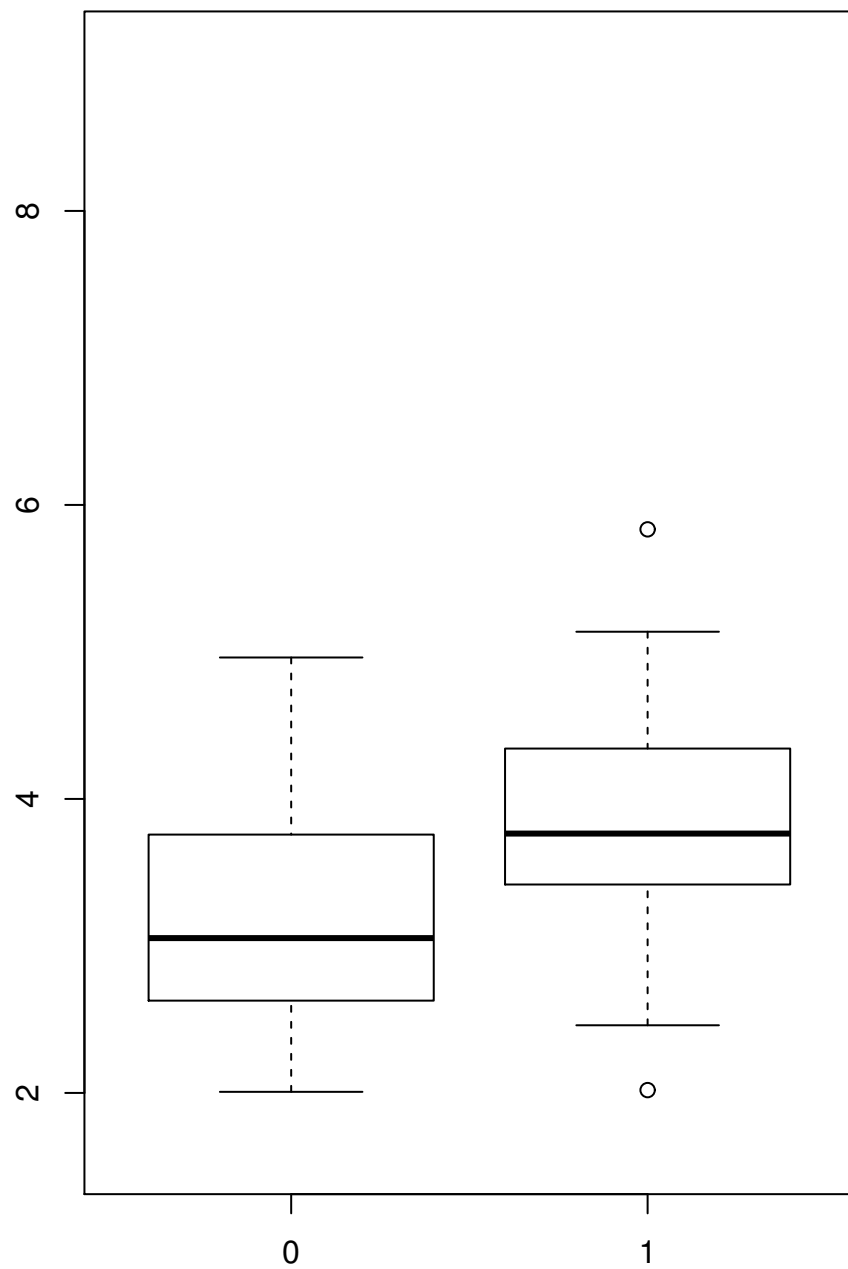

**hsa-miR-296-3p  
(GSE67139)**

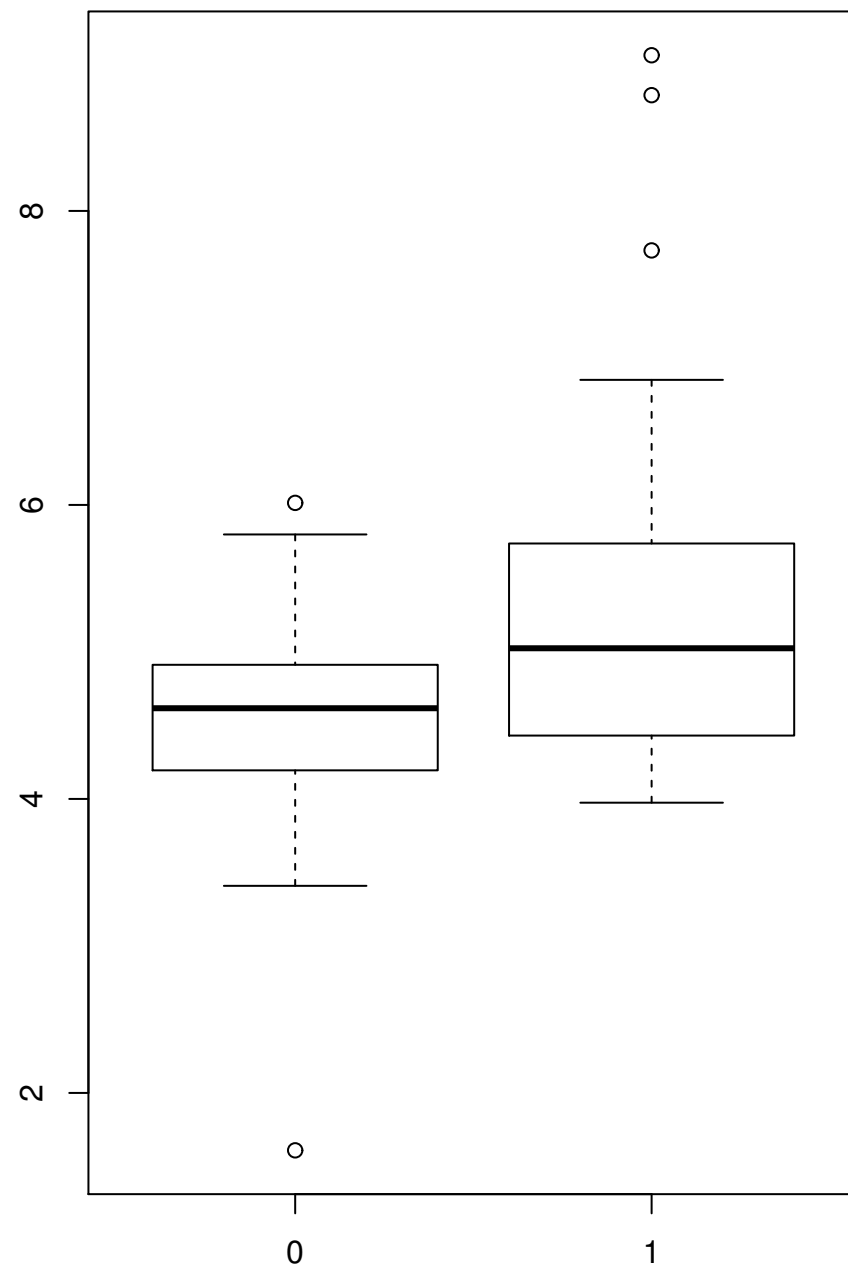

**hsa-miR-297**  
**(GSE67138)**

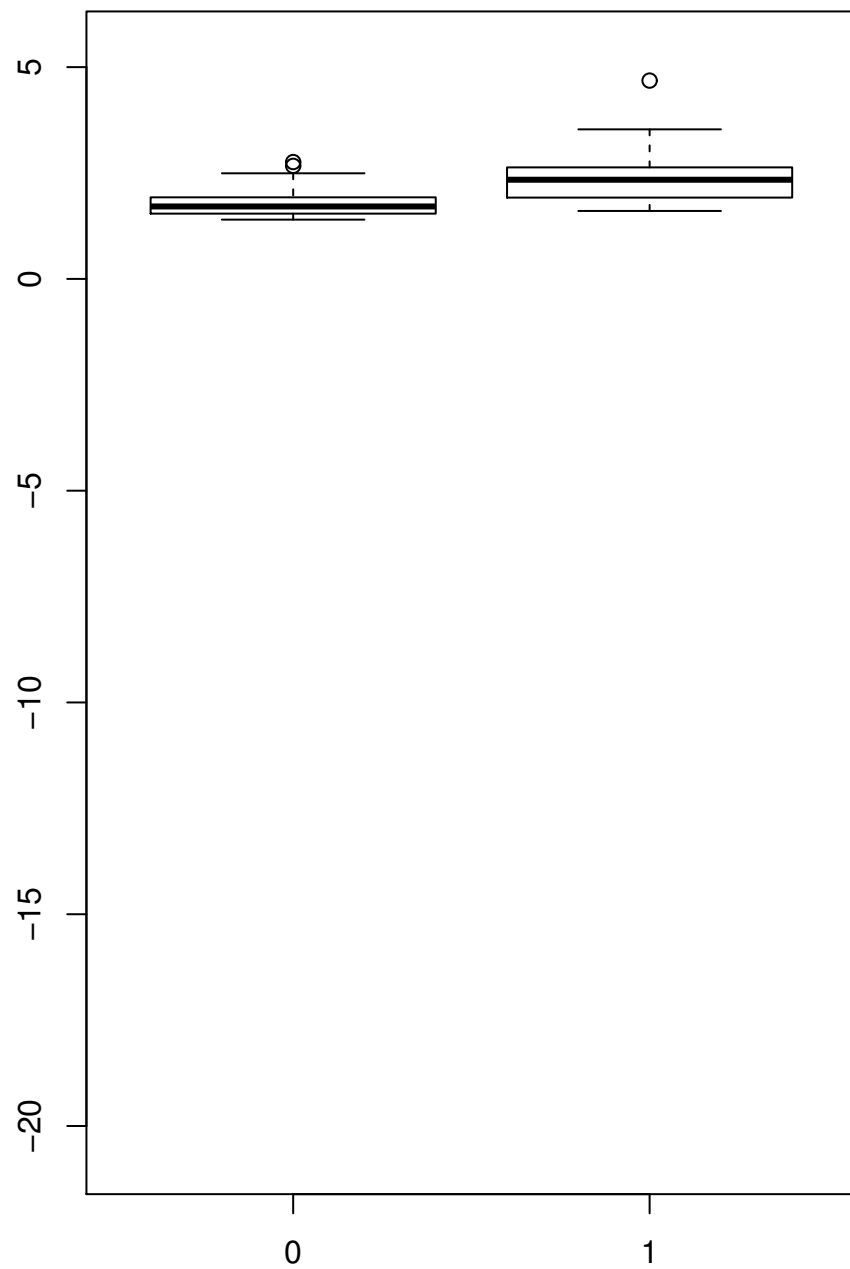

**hsa-miR-297**  
**(GSE67139)**

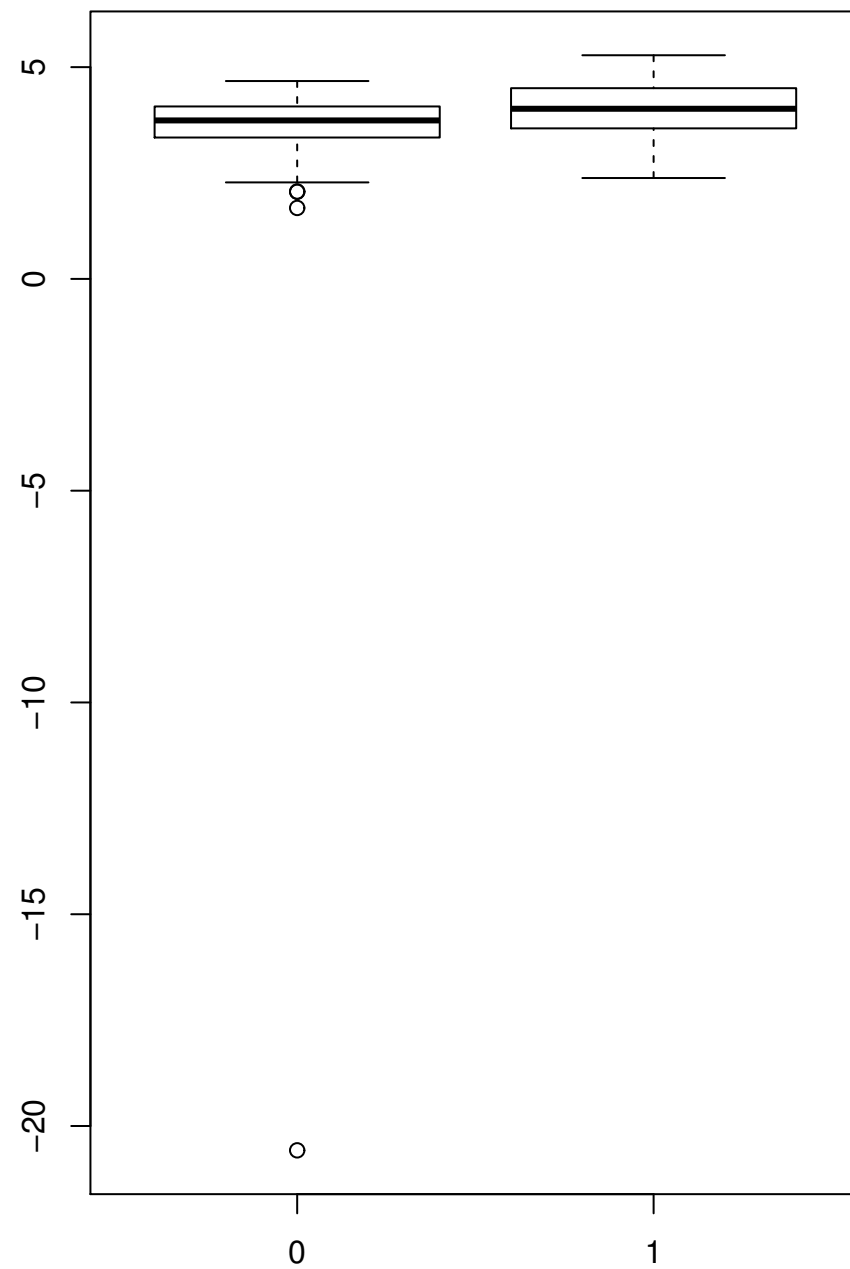

**hsa-miR-29b-1-star**  
**(GSE67138)**

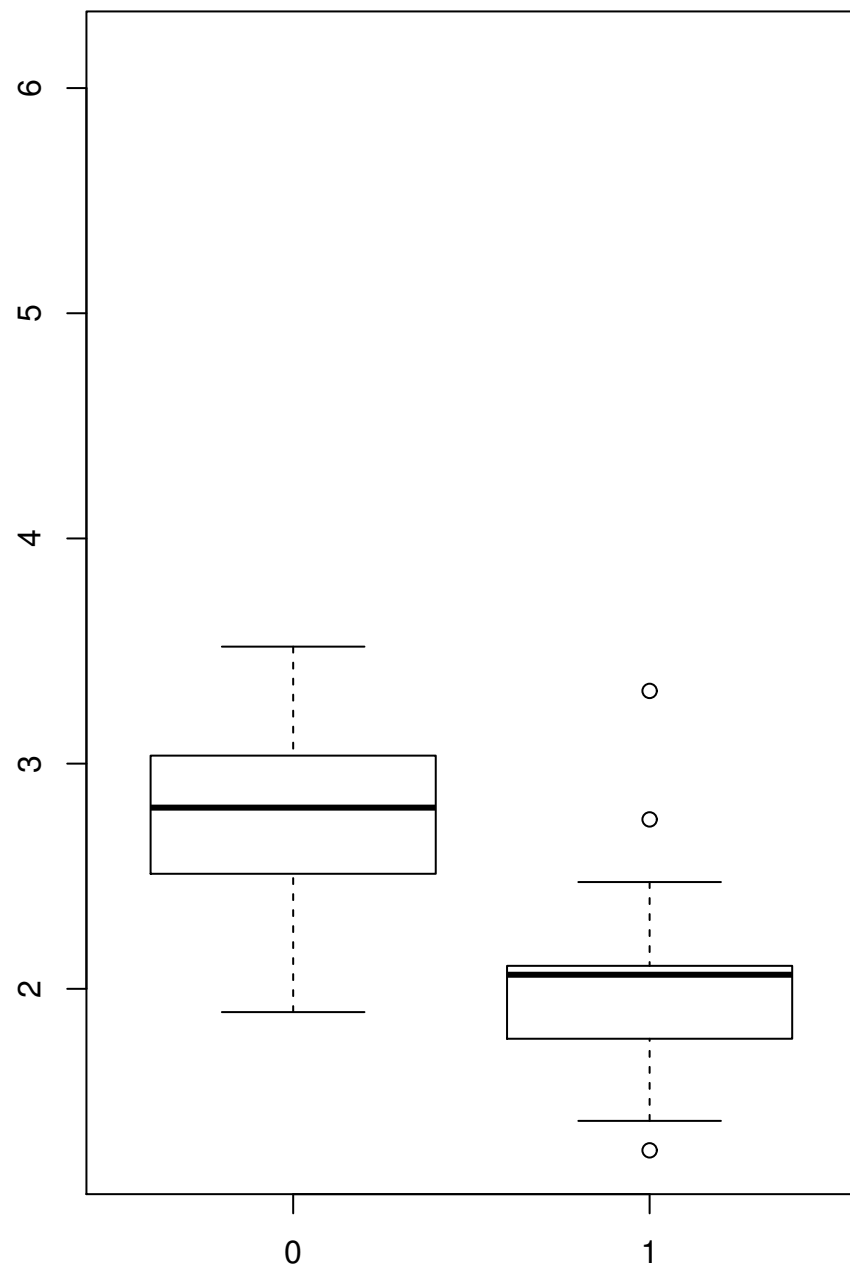

**hsa-miR-29b-1-star**  
**(GSE67139)**

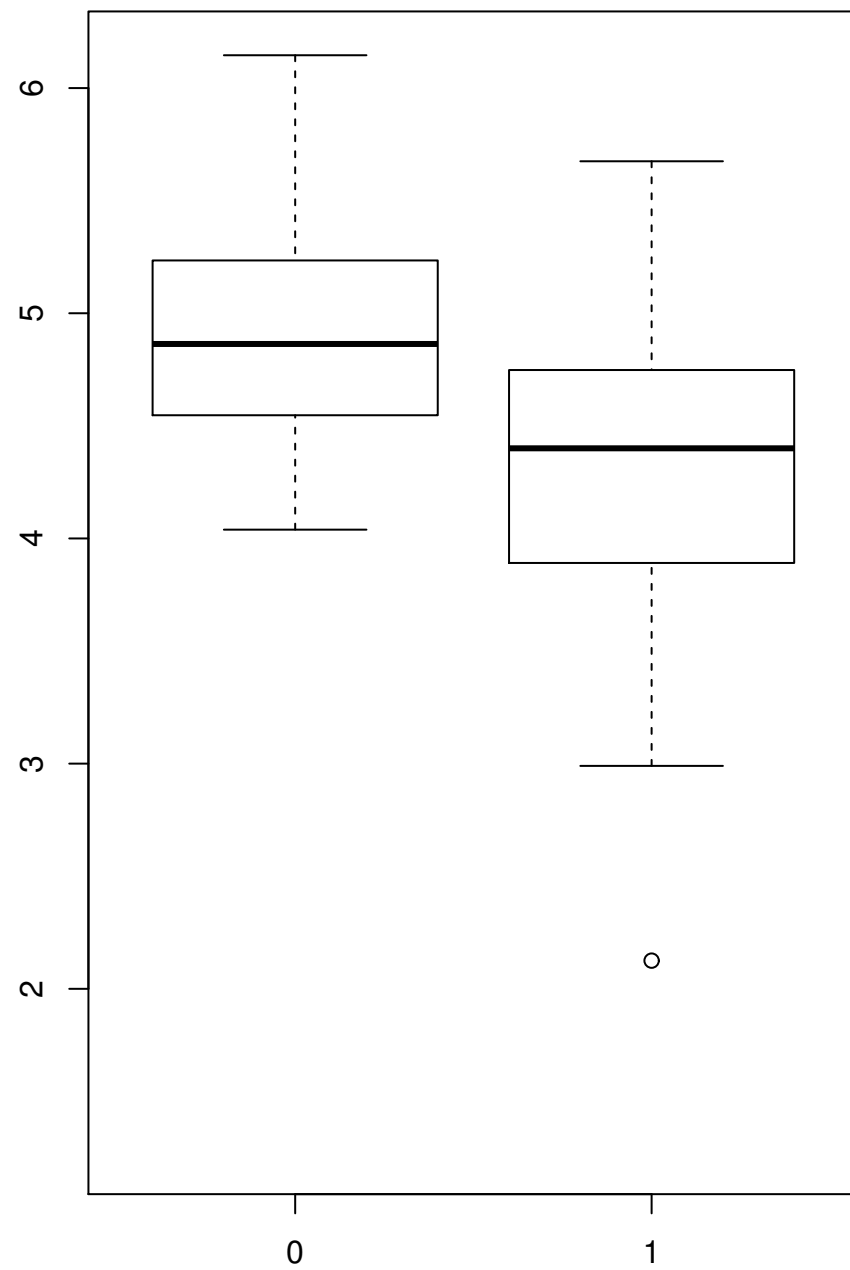

**hsa-miR-29b**  
**(GSE67138)**

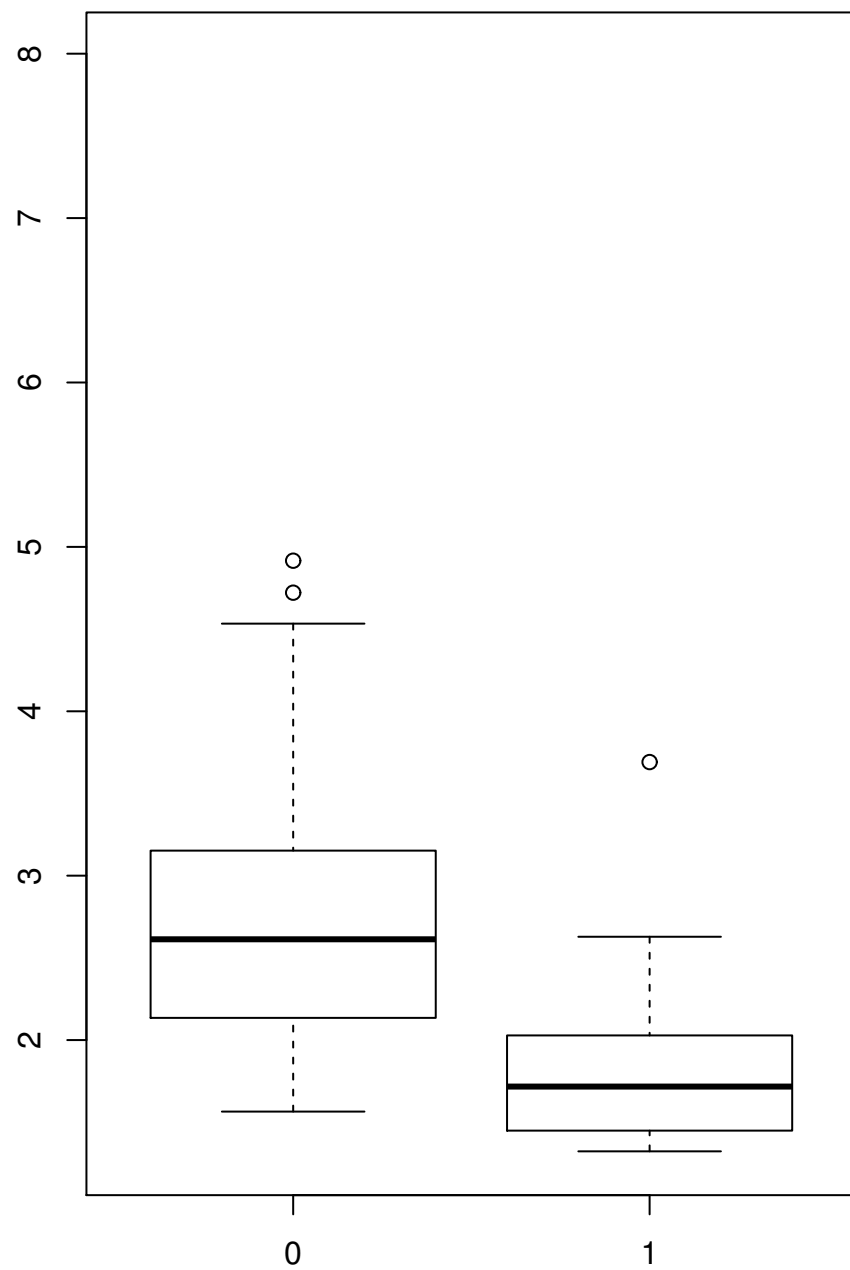

**hsa-miR-29b**  
**(GSE67139)**

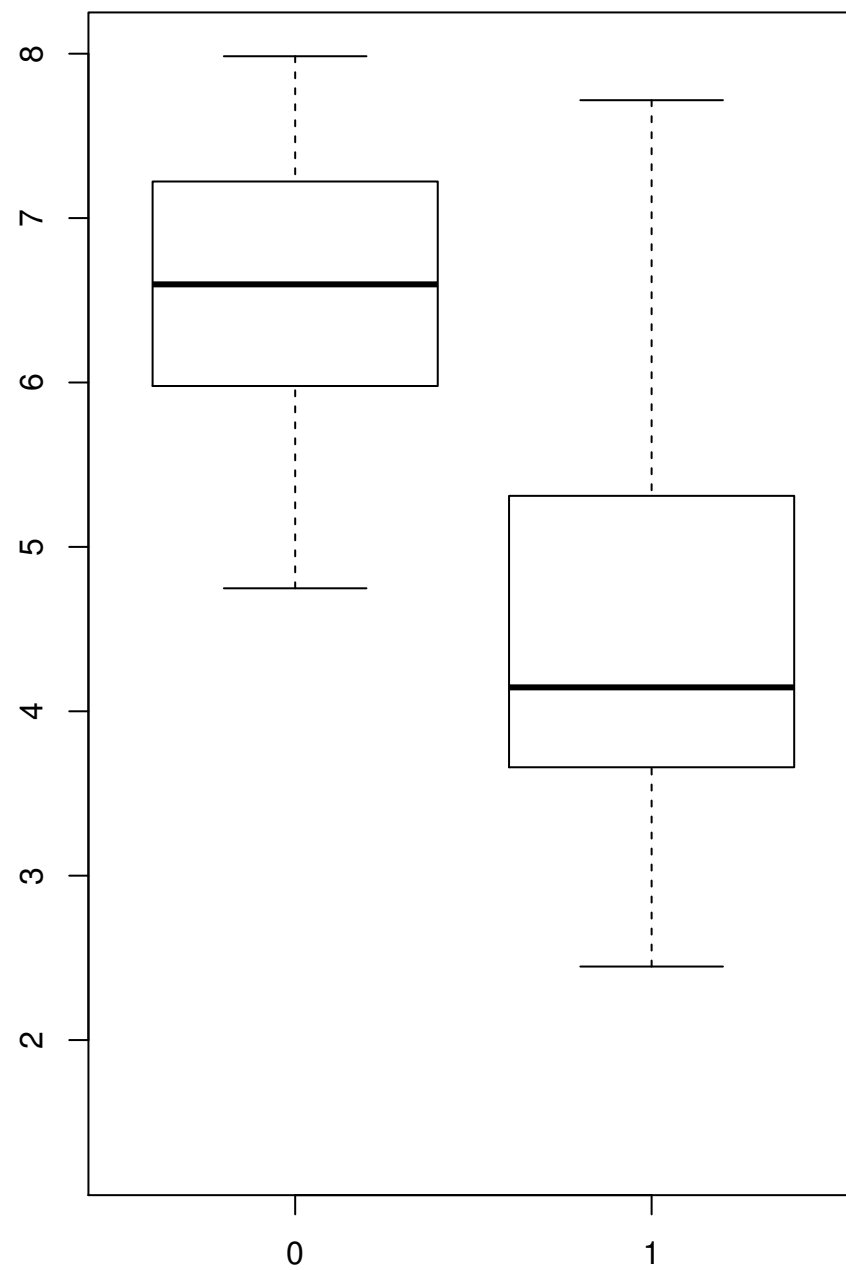

**hsa-miR-29c-star**  
**(GSE67138)**

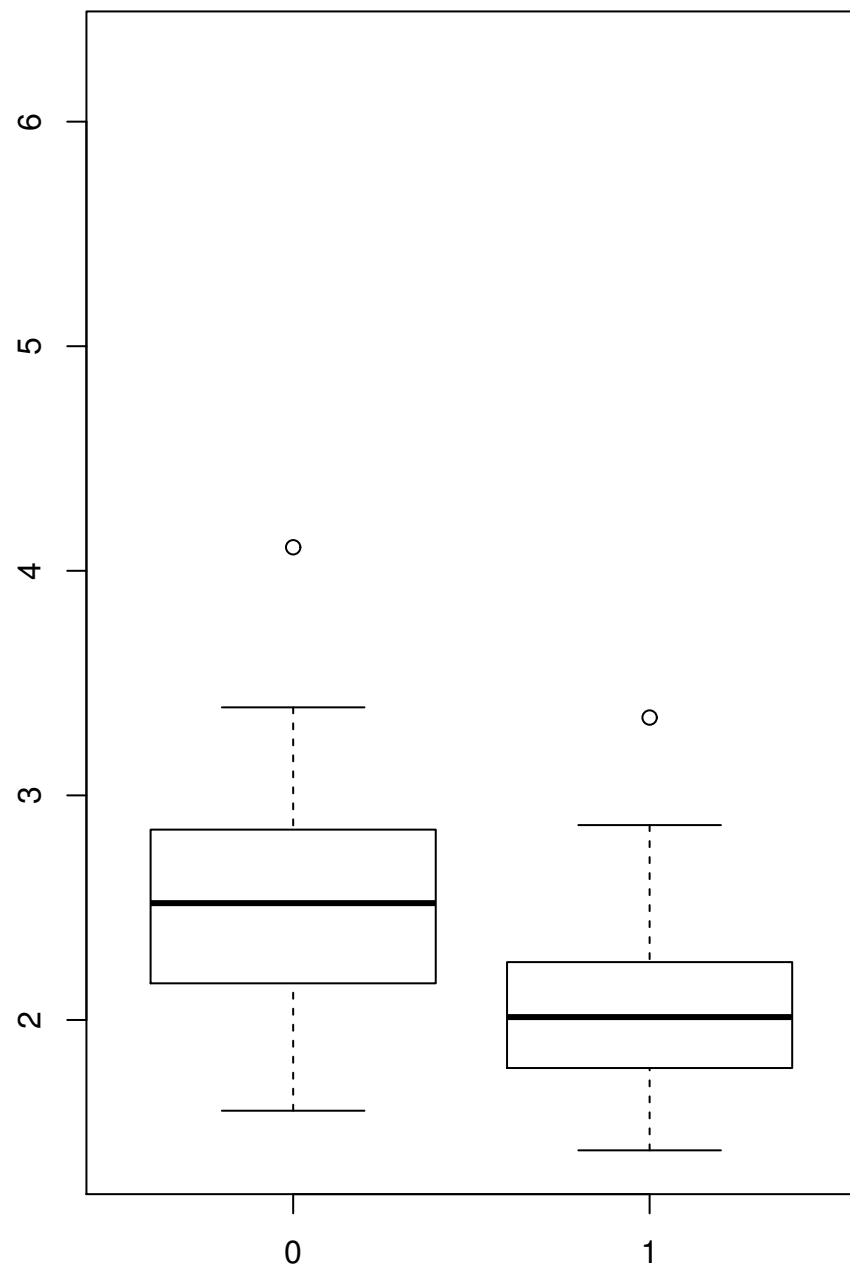

**hsa-miR-29c-star**  
**(GSE67139)**

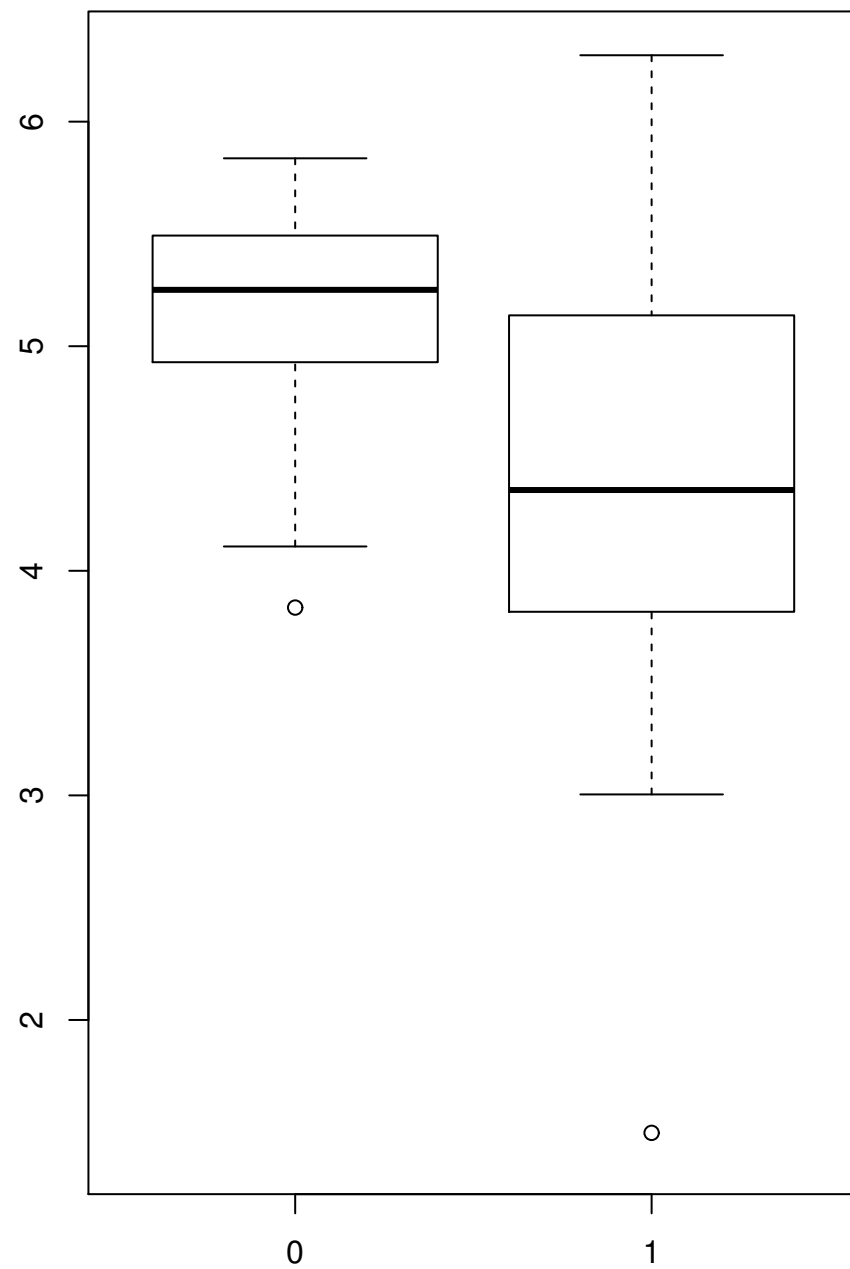

**hsa-miR-29c  
(GSE67138)**

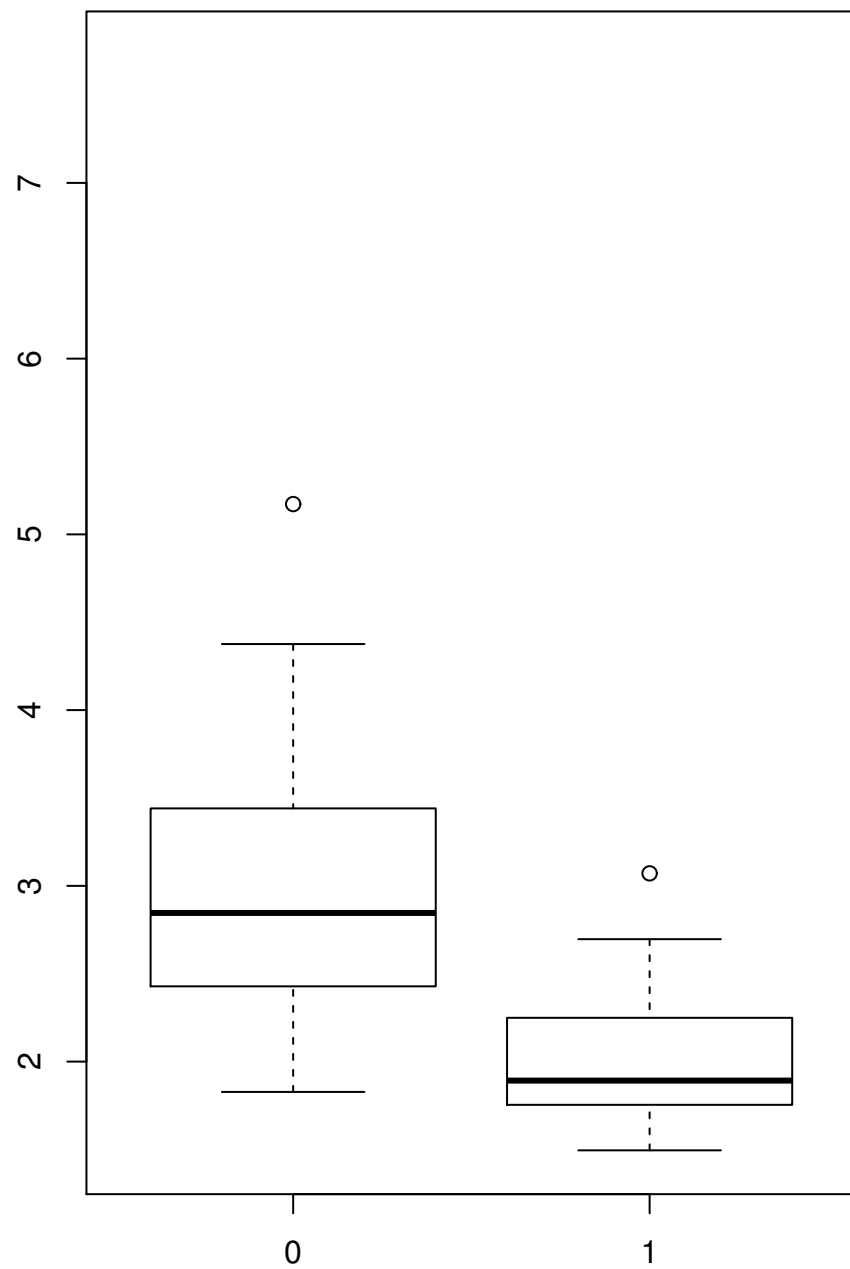

**hsa-miR-29c  
(GSE67139)**

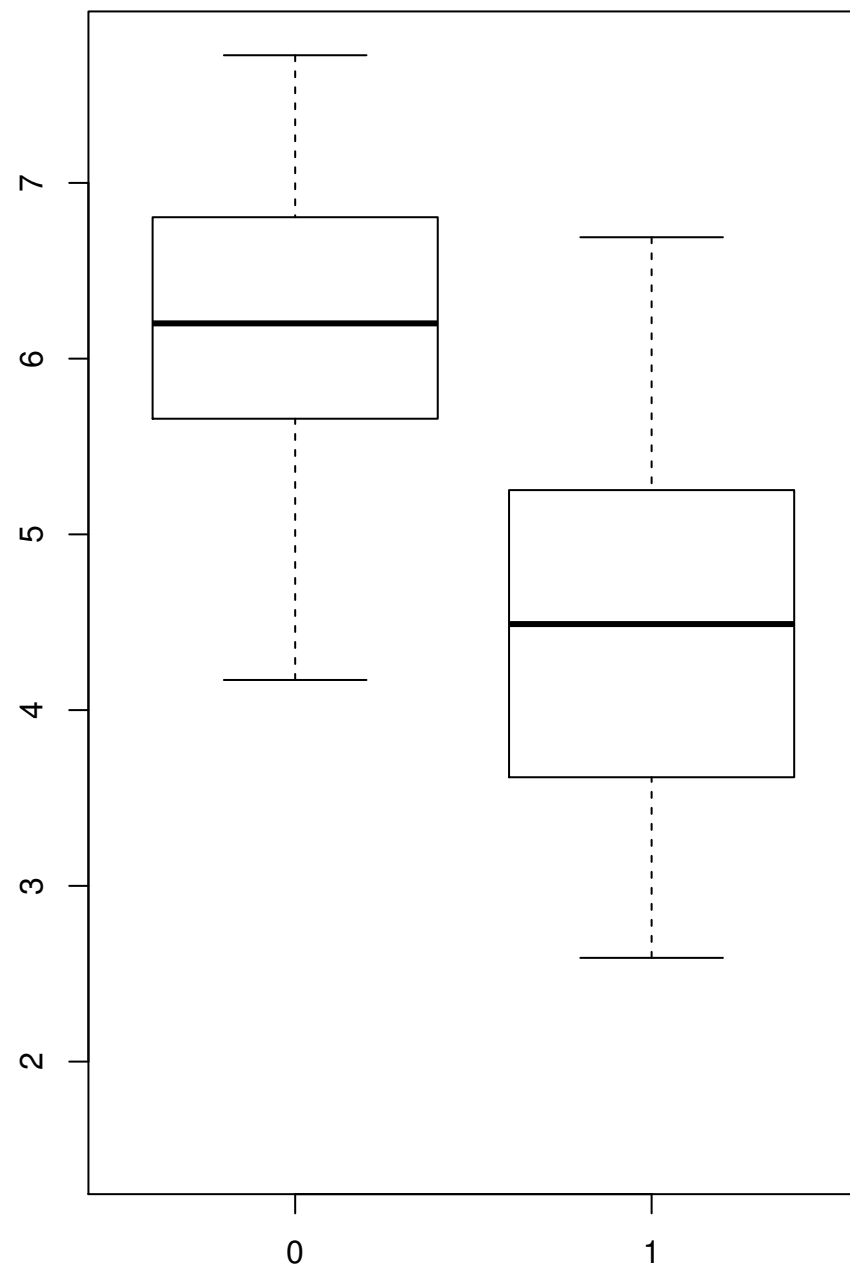



**hsa-miR-302e**  
**(GSE67138)**

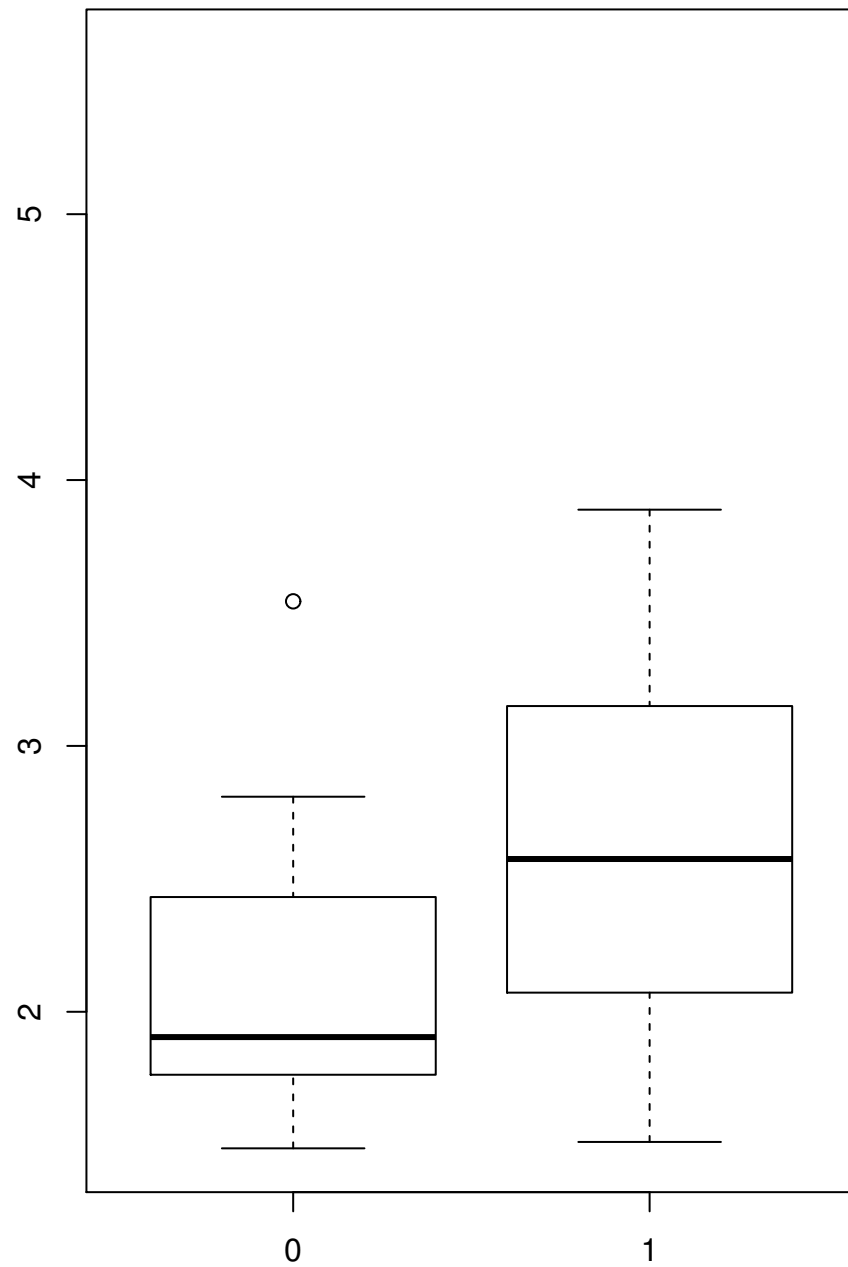

**hsa-miR-302e**  
**(GSE67139)**

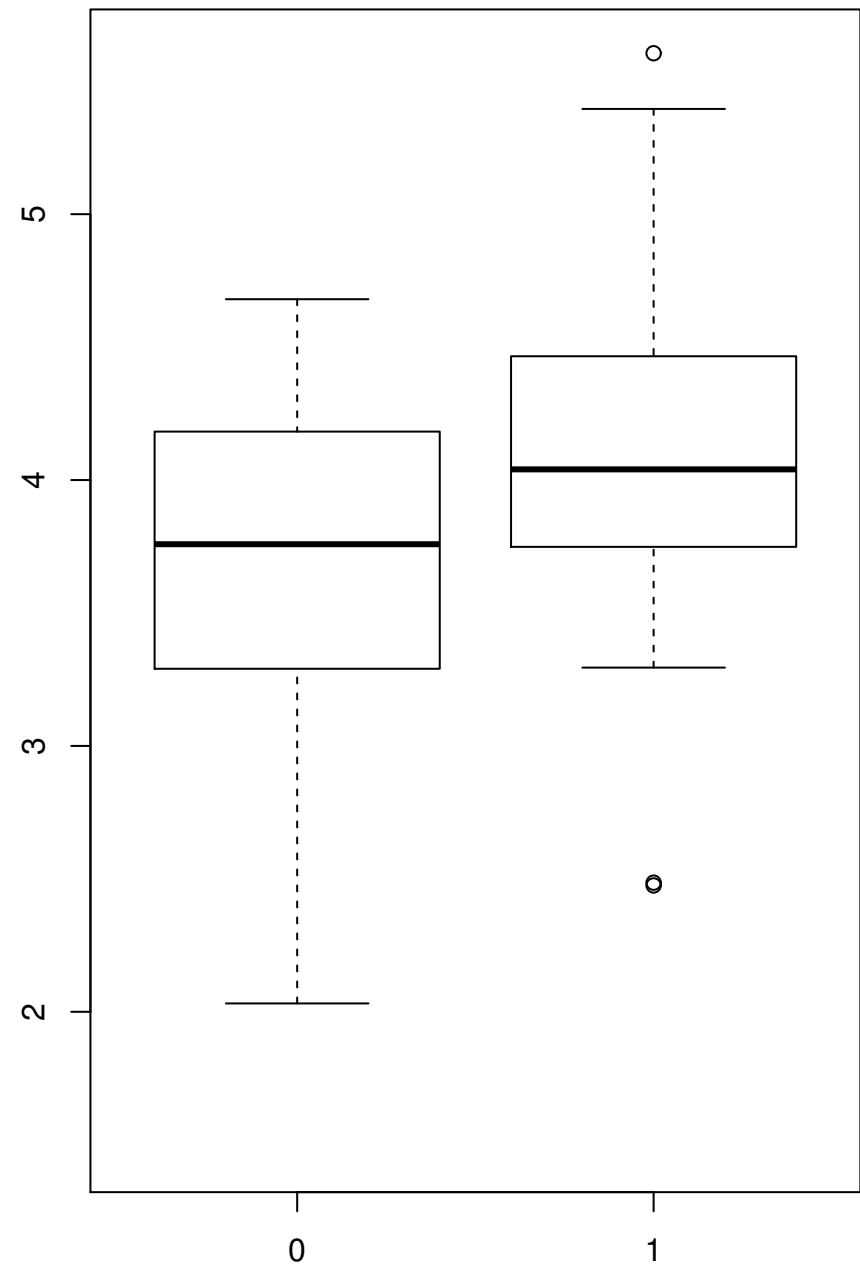

hsa-miR-30a-star  
(GSE67138)

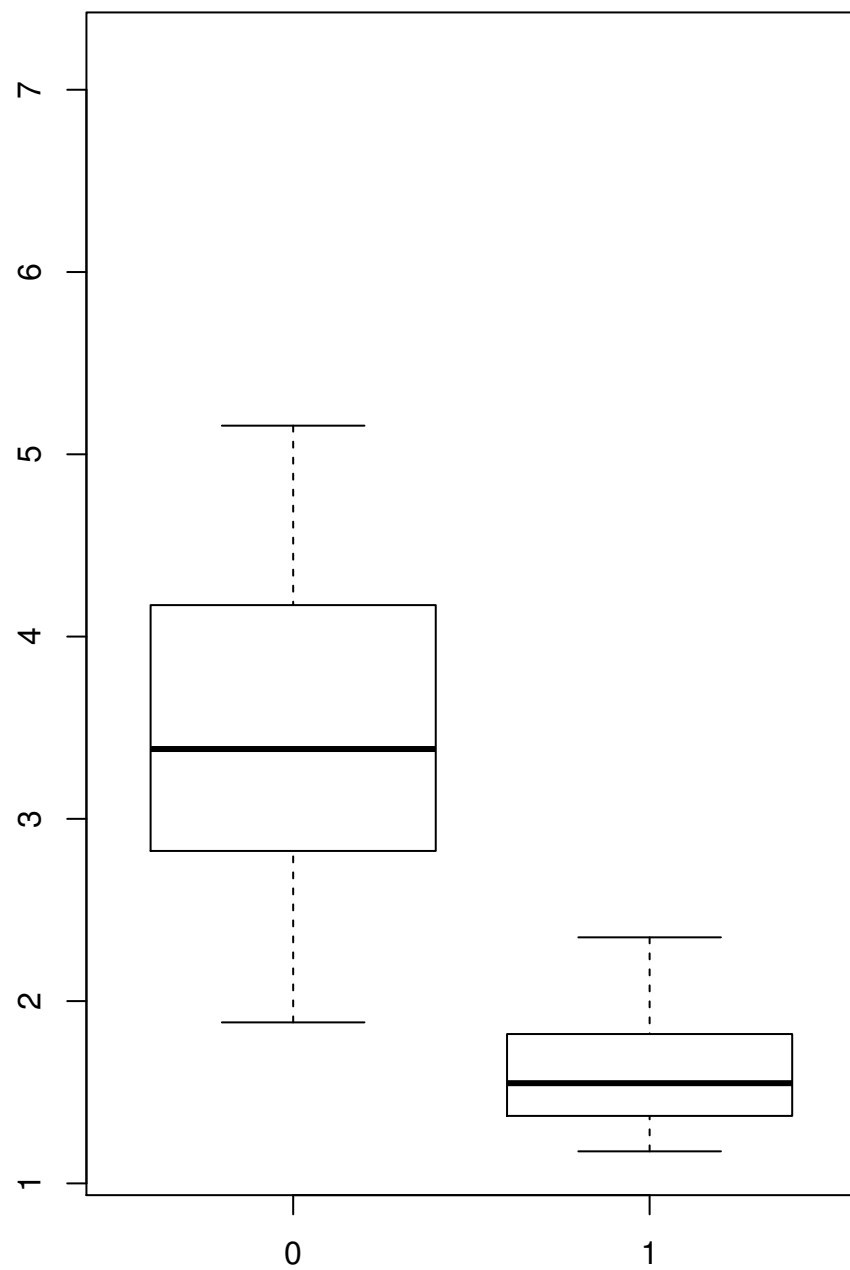

hsa-miR-30a-star  
(GSE67139)

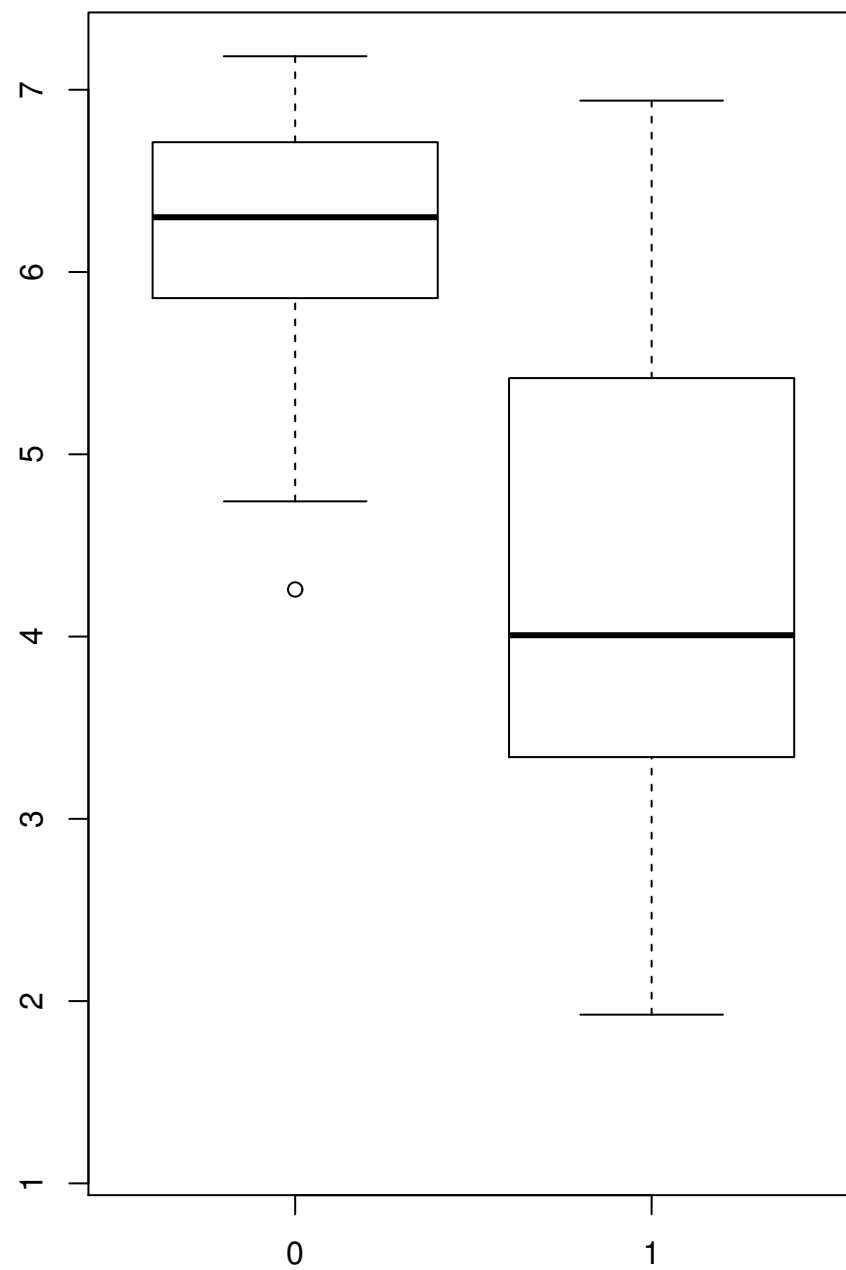

**hsa-miR-30c-1-star  
(GSE67138)**

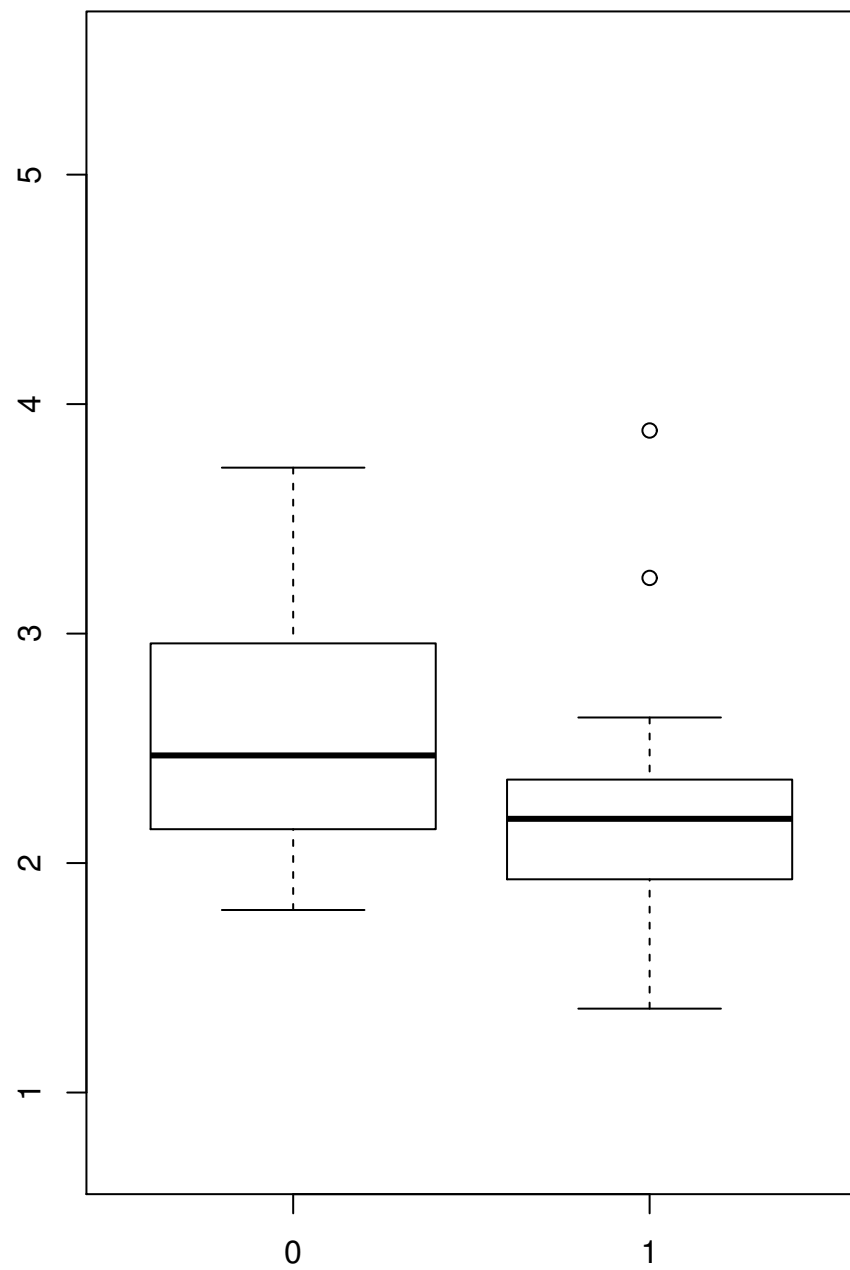

**hsa-miR-30c-1-star  
(GSE67139)**

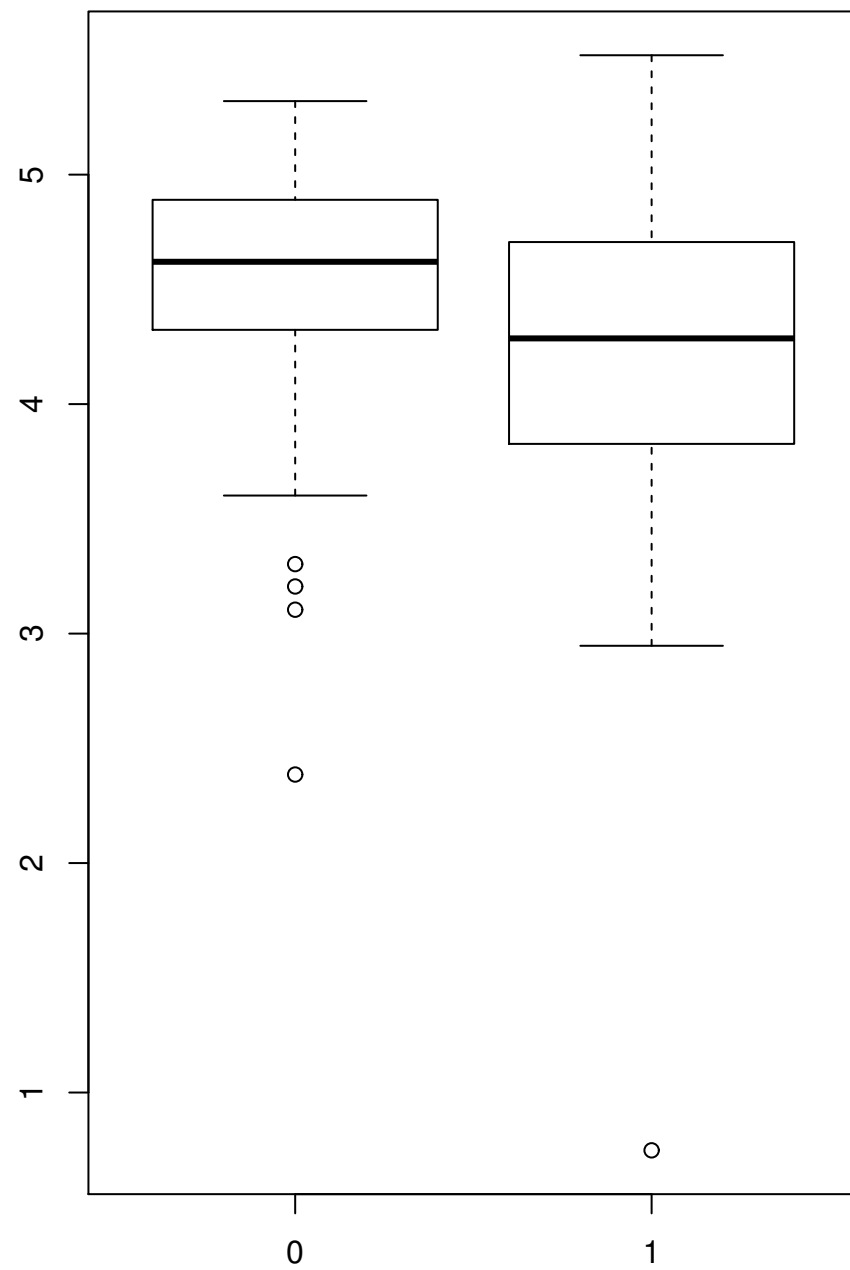

**hsa-miR-30e  
(GSE67138)**

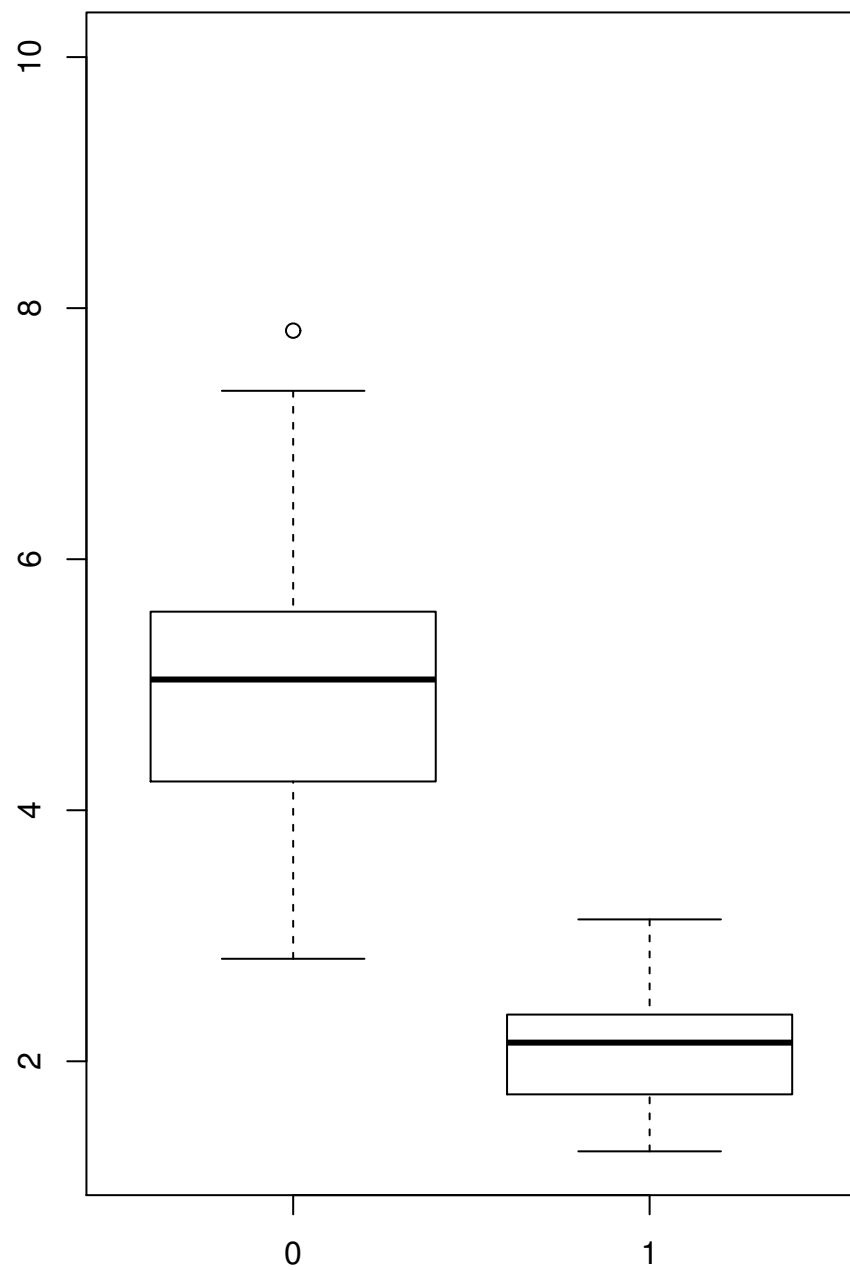

**hsa-miR-30e  
(GSE67139)**

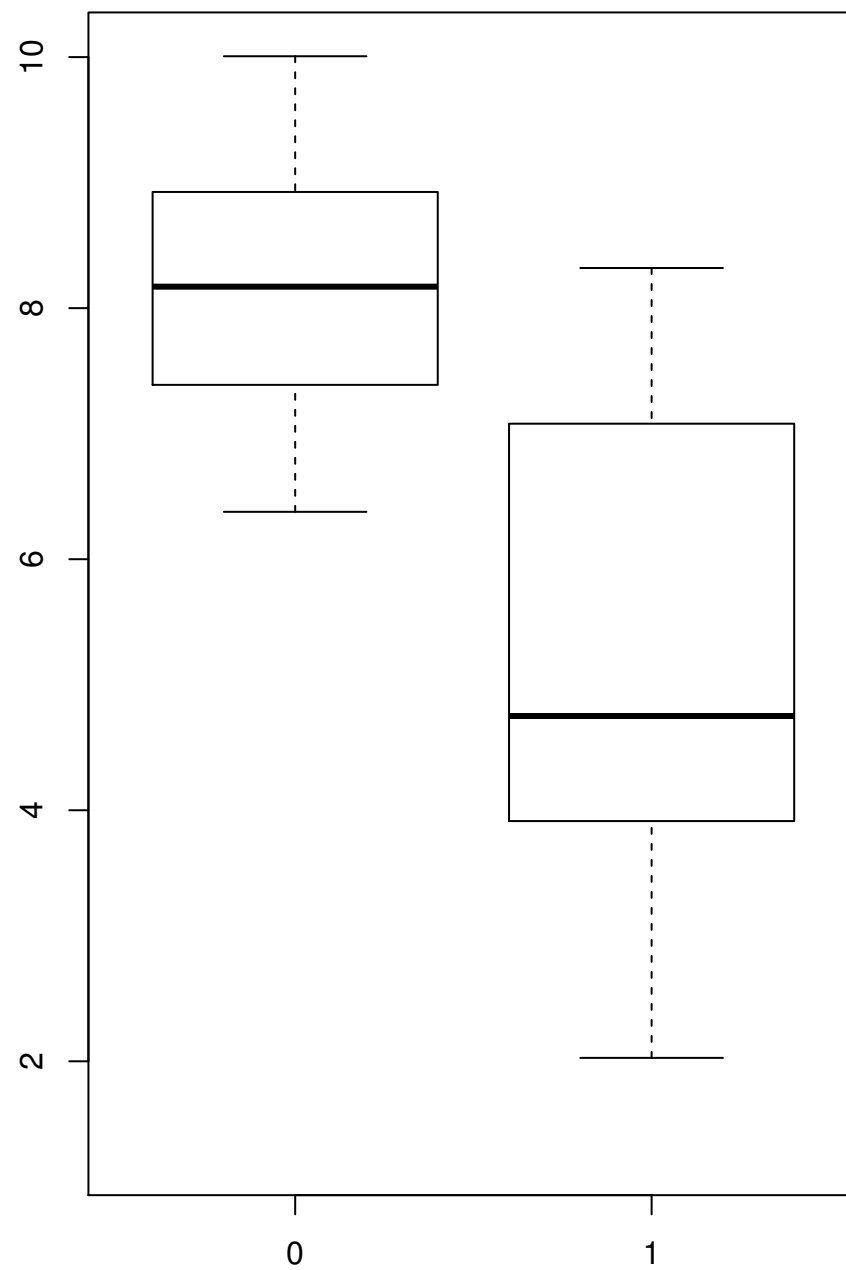

**hsa-miR-320d**  
**(GSE67138)**

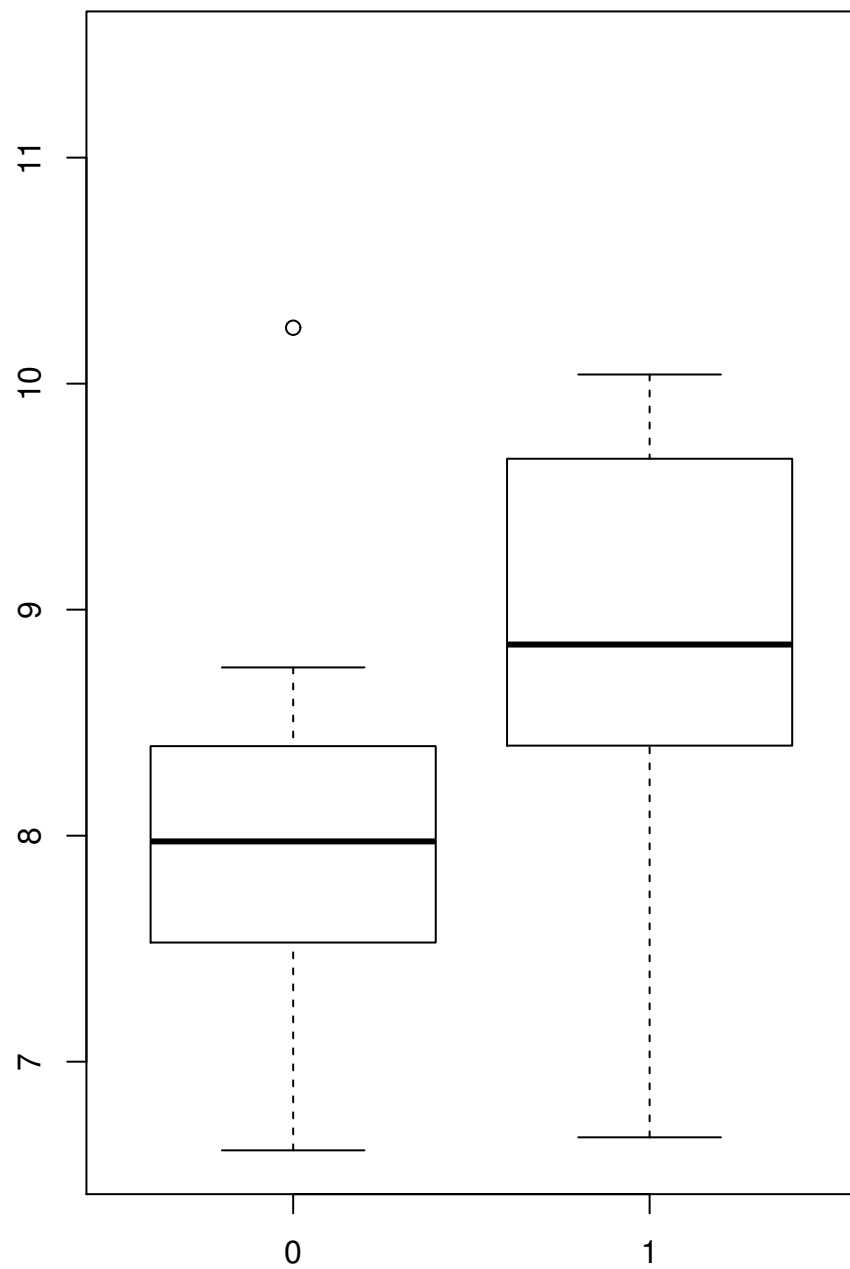

**hsa-miR-320d**  
**(GSE67139)**

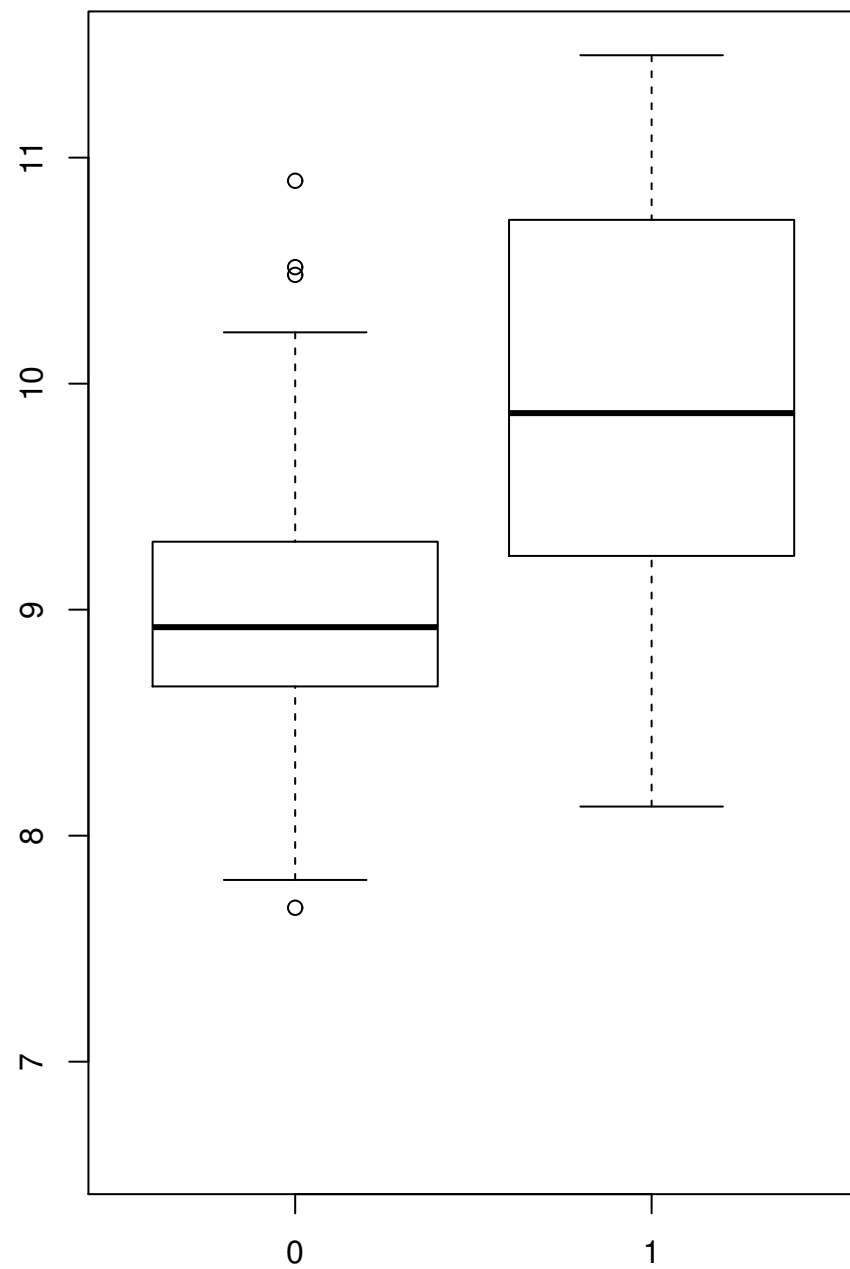

**hsa-miR-32**  
**(GSE67138)**

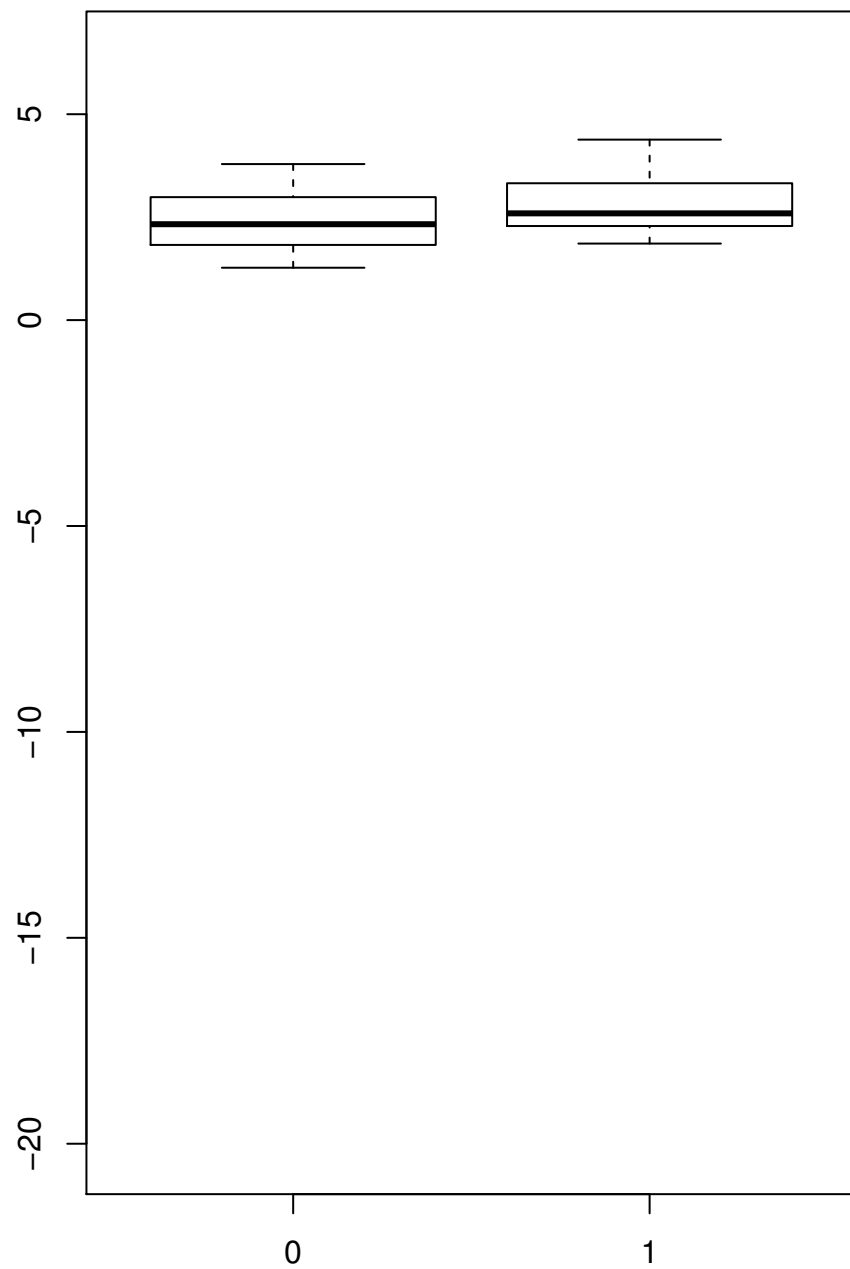

**hsa-miR-32**  
**(GSE67139)**

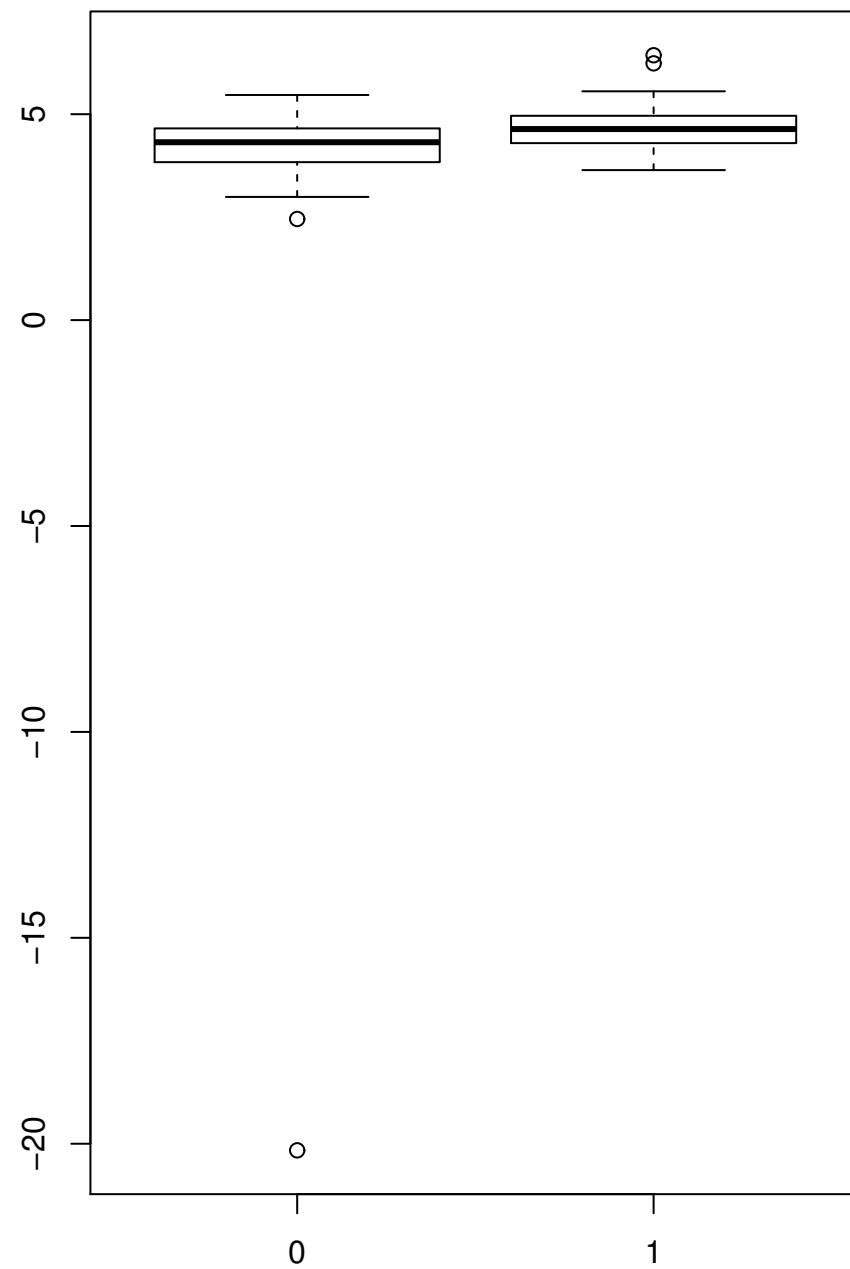

**hsa-miR-330-3p  
(GSE67138)**

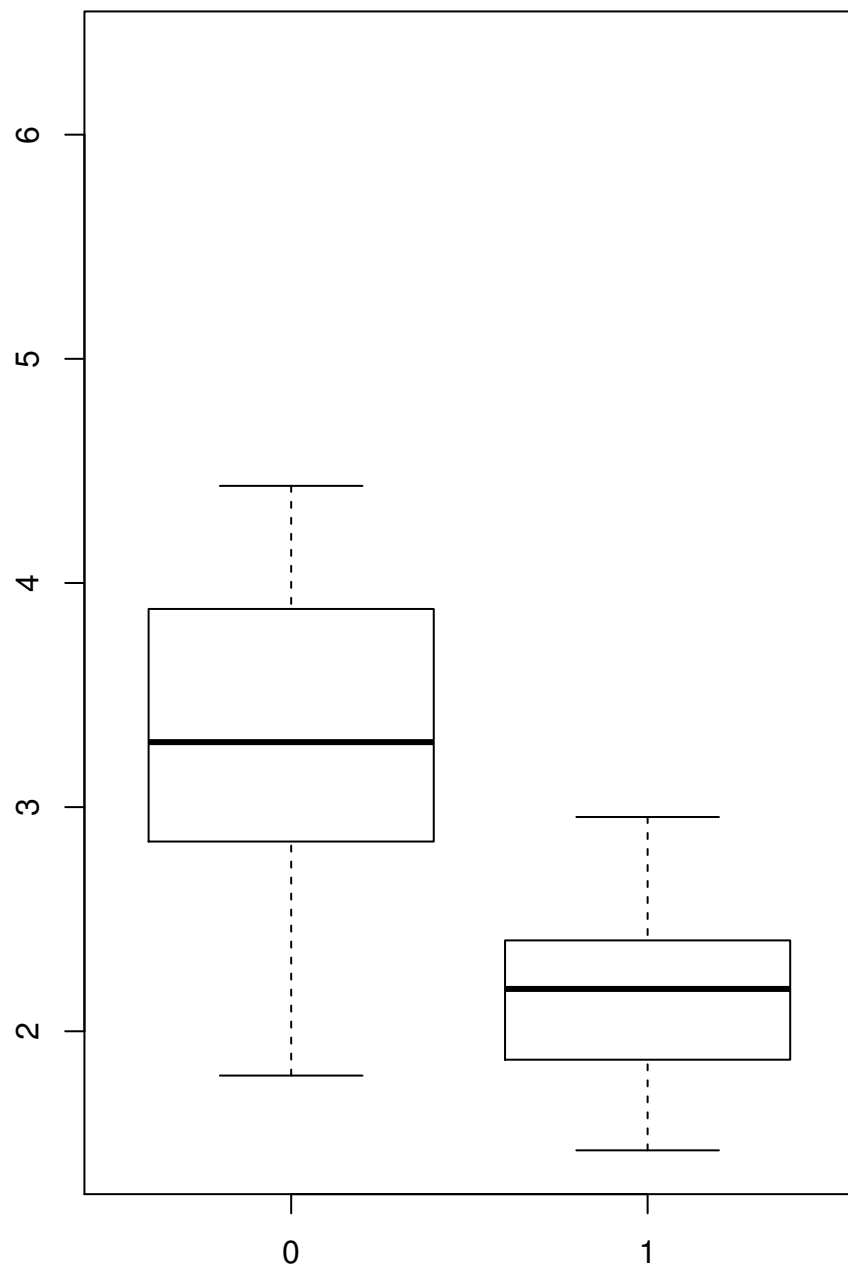

**hsa-miR-330-3p  
(GSE67139)**

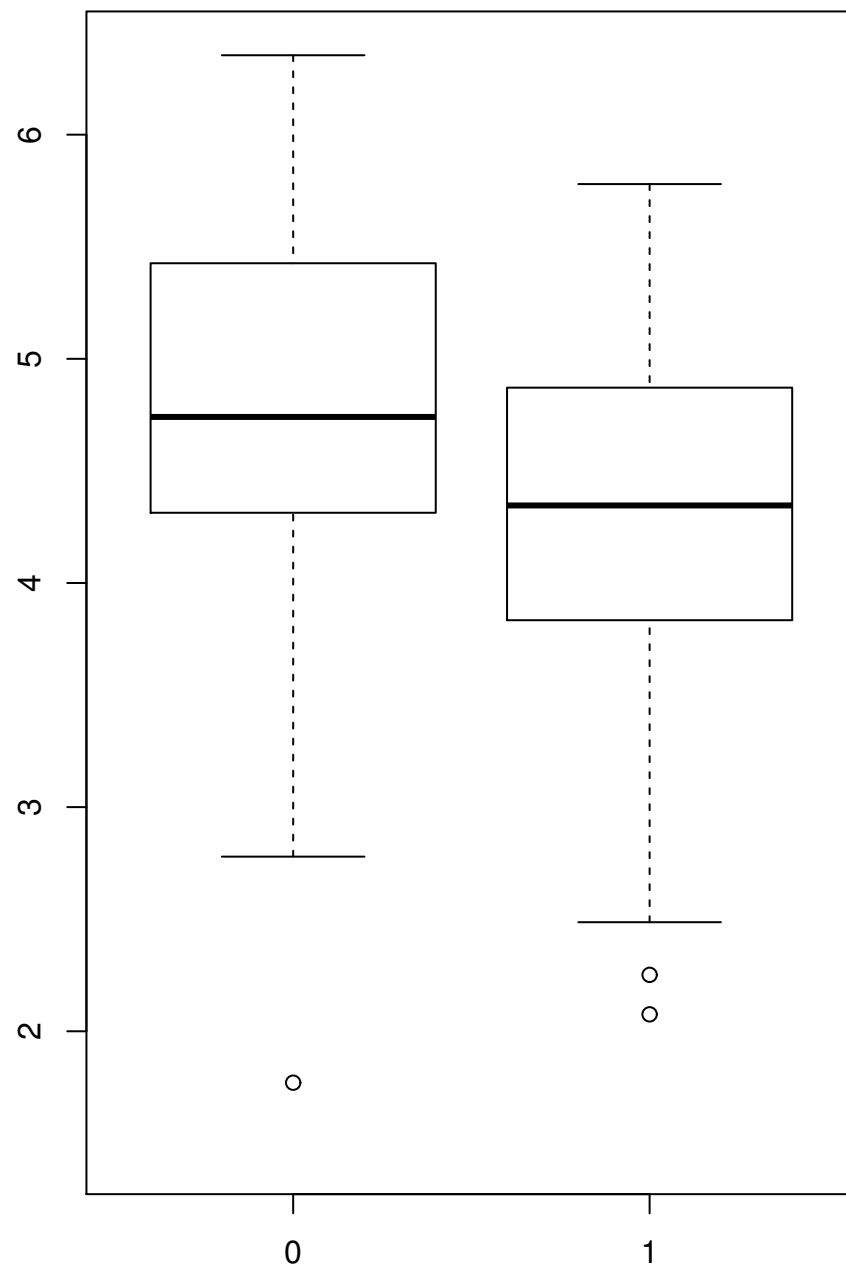

**hsa-miR-331-5p  
(GSE67138)**

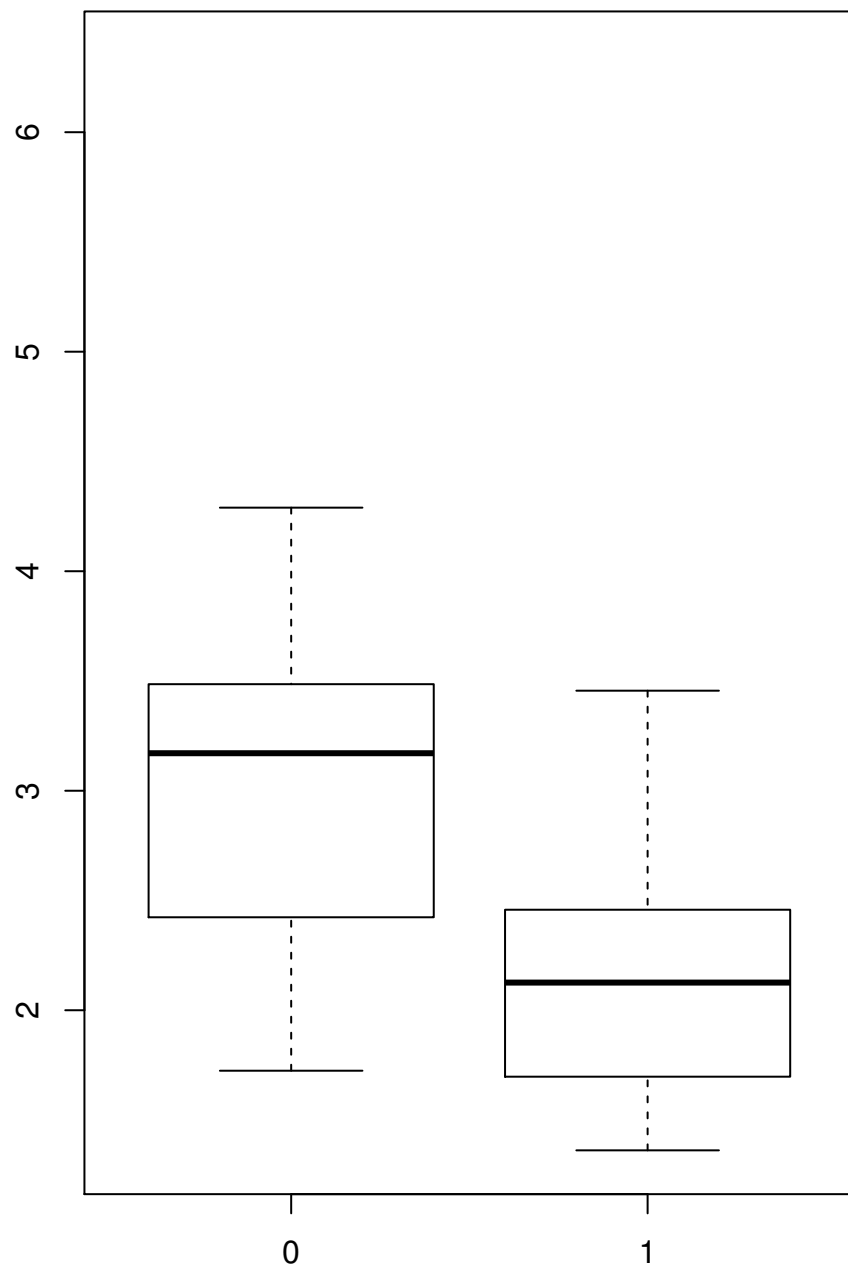

**hsa-miR-331-5p  
(GSE67139)**

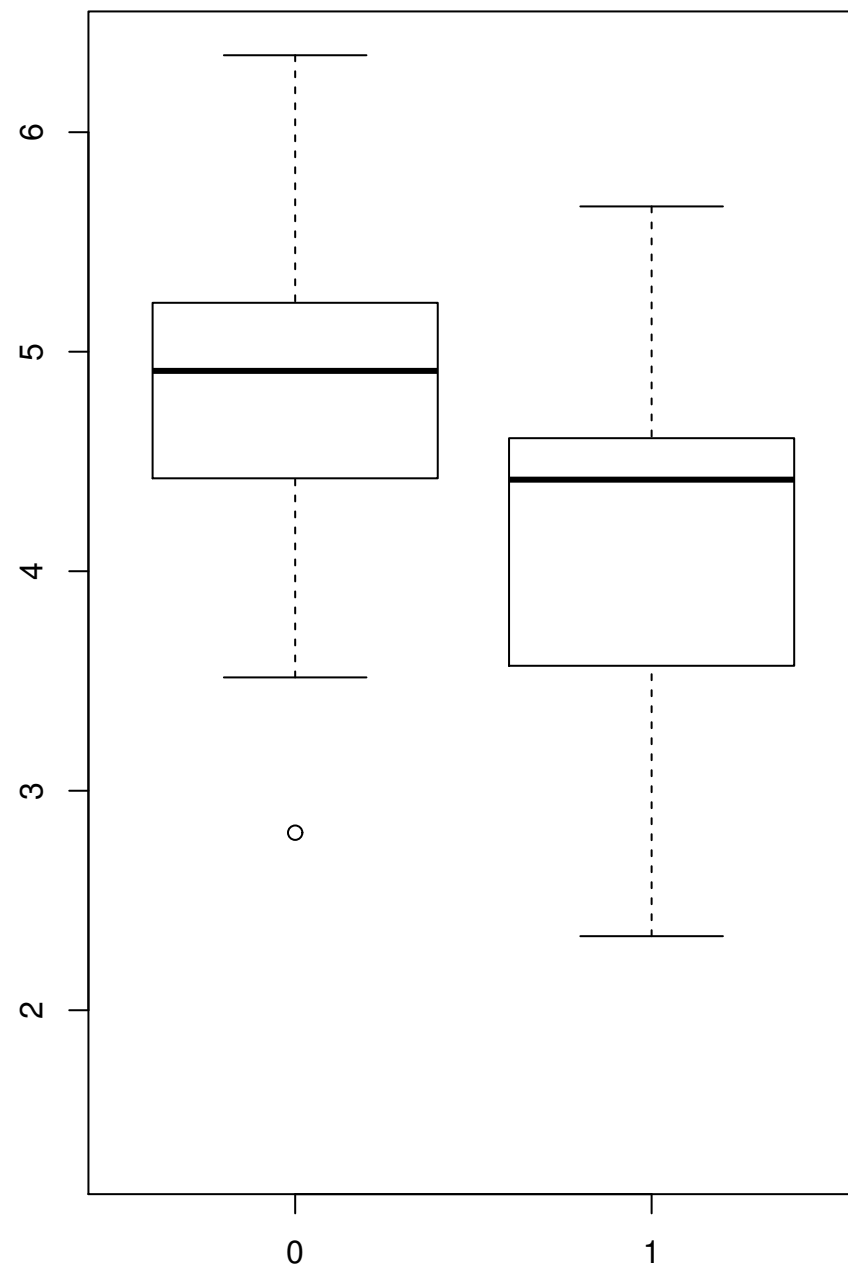



**hsa-miR-337-5p  
(GSE67138)**

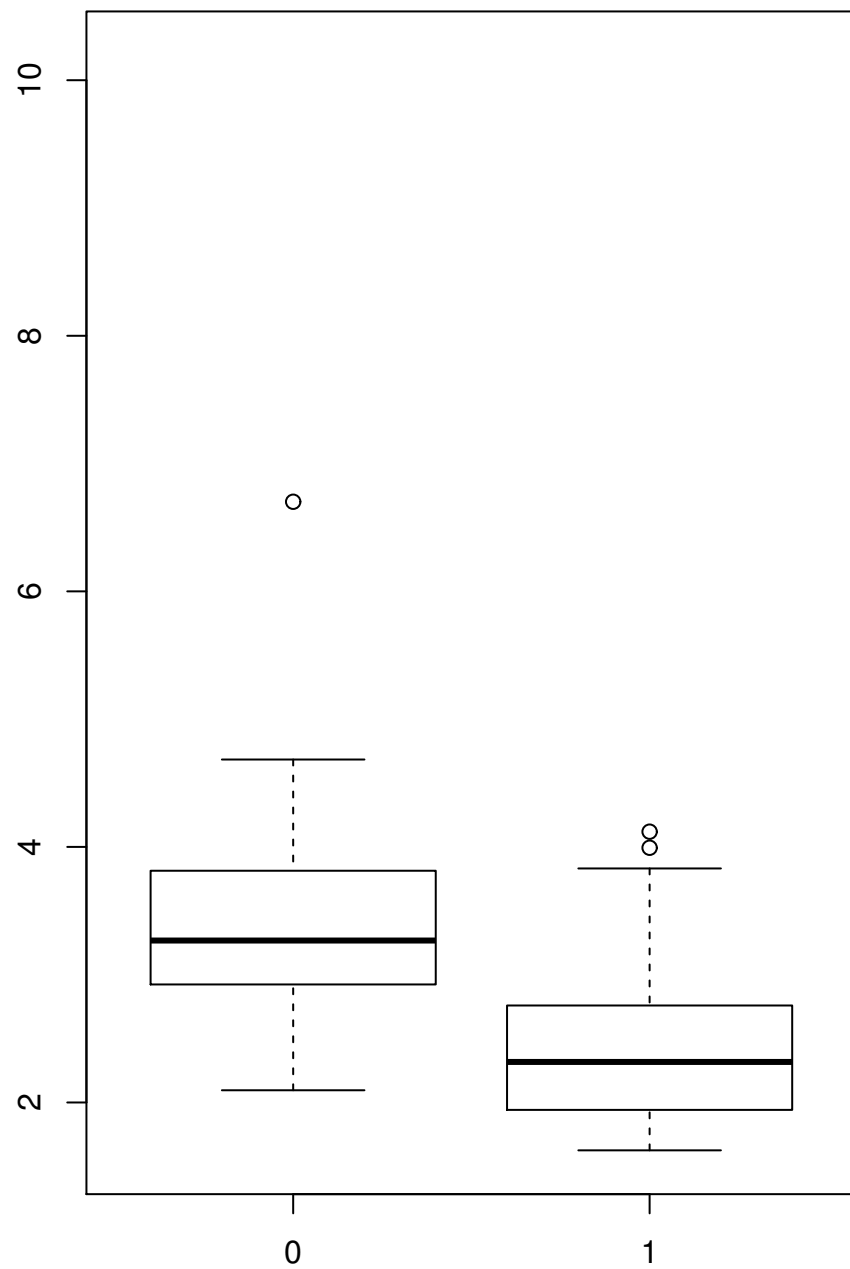

**hsa-miR-337-5p  
(GSE67139)**

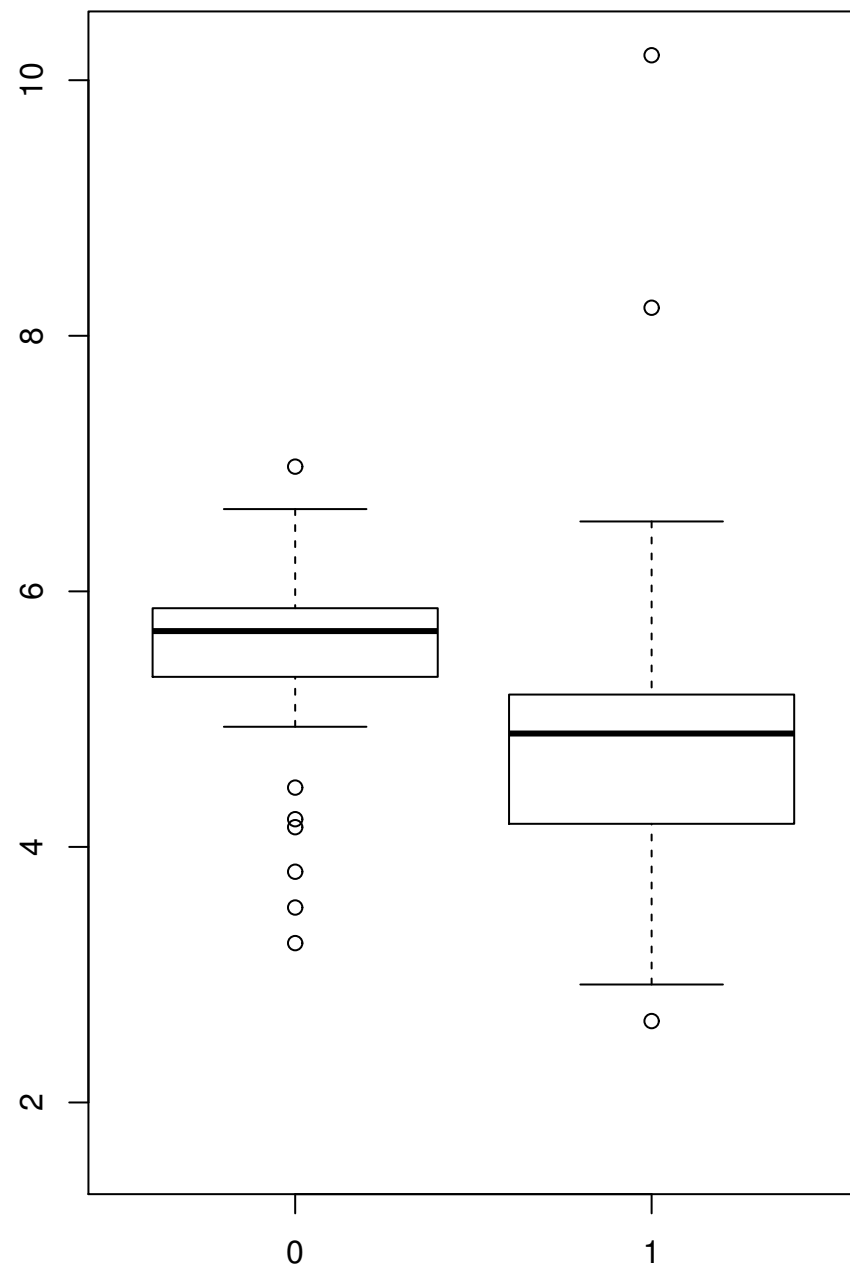

**hsa-miR-339-3p**  
**(GSE67138)**

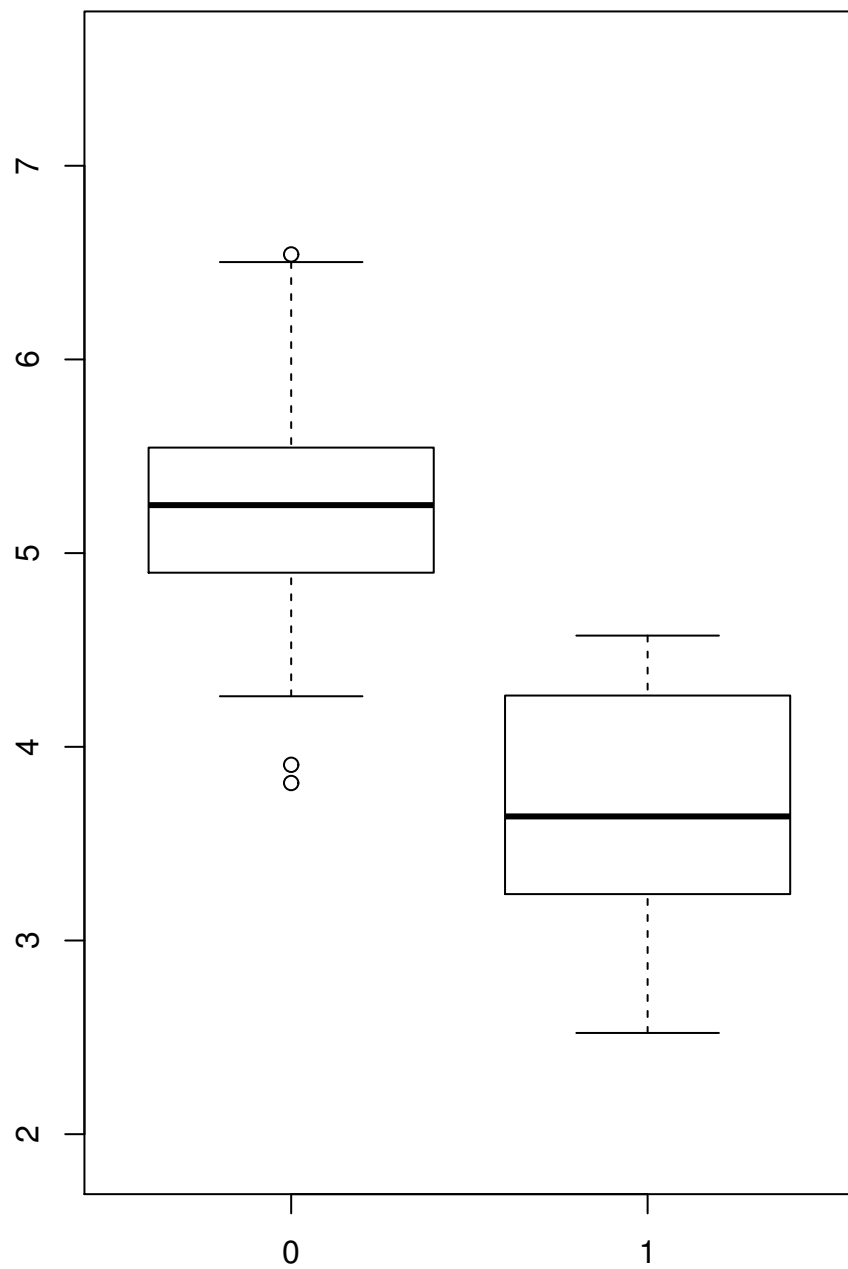

**hsa-miR-339-3p**  
**(GSE67139)**

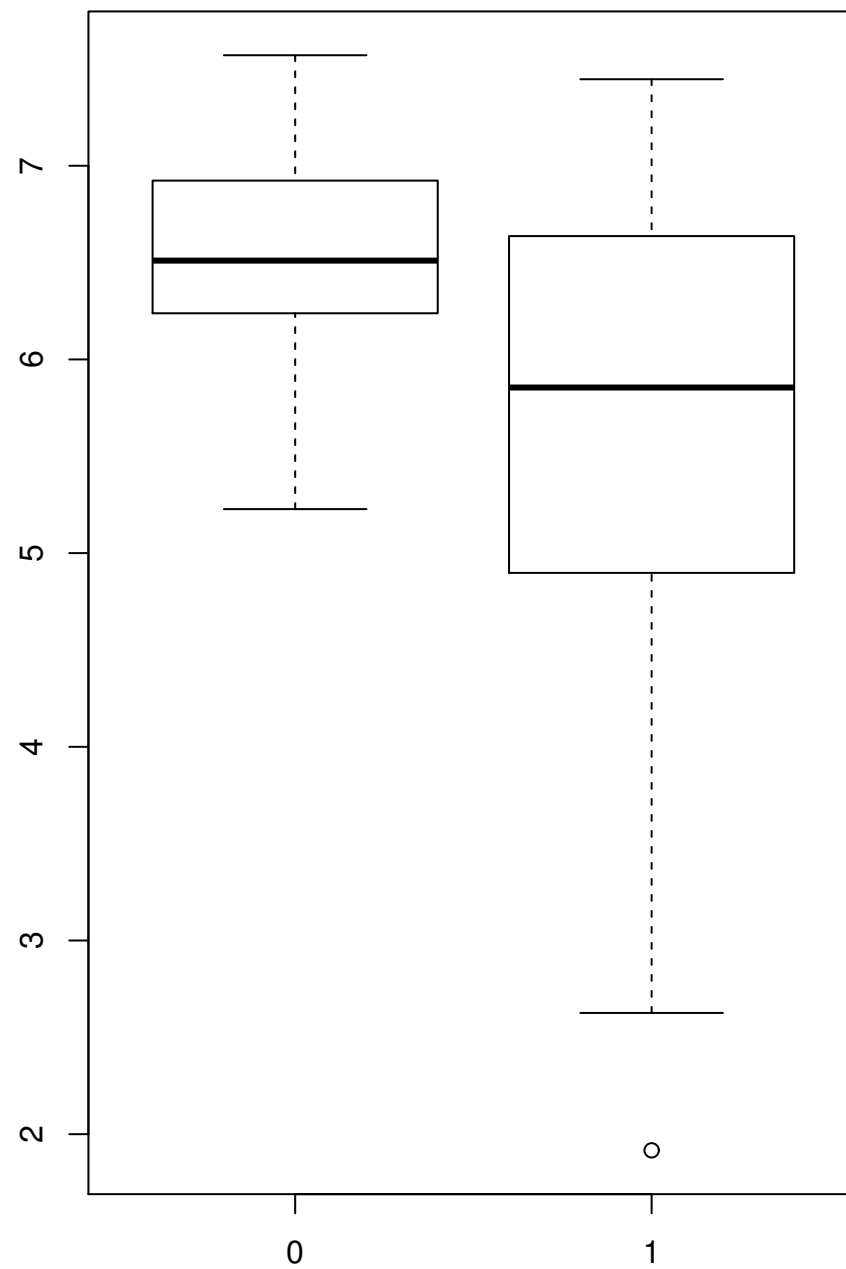

**hsa-miR-33b  
(GSE67138)**

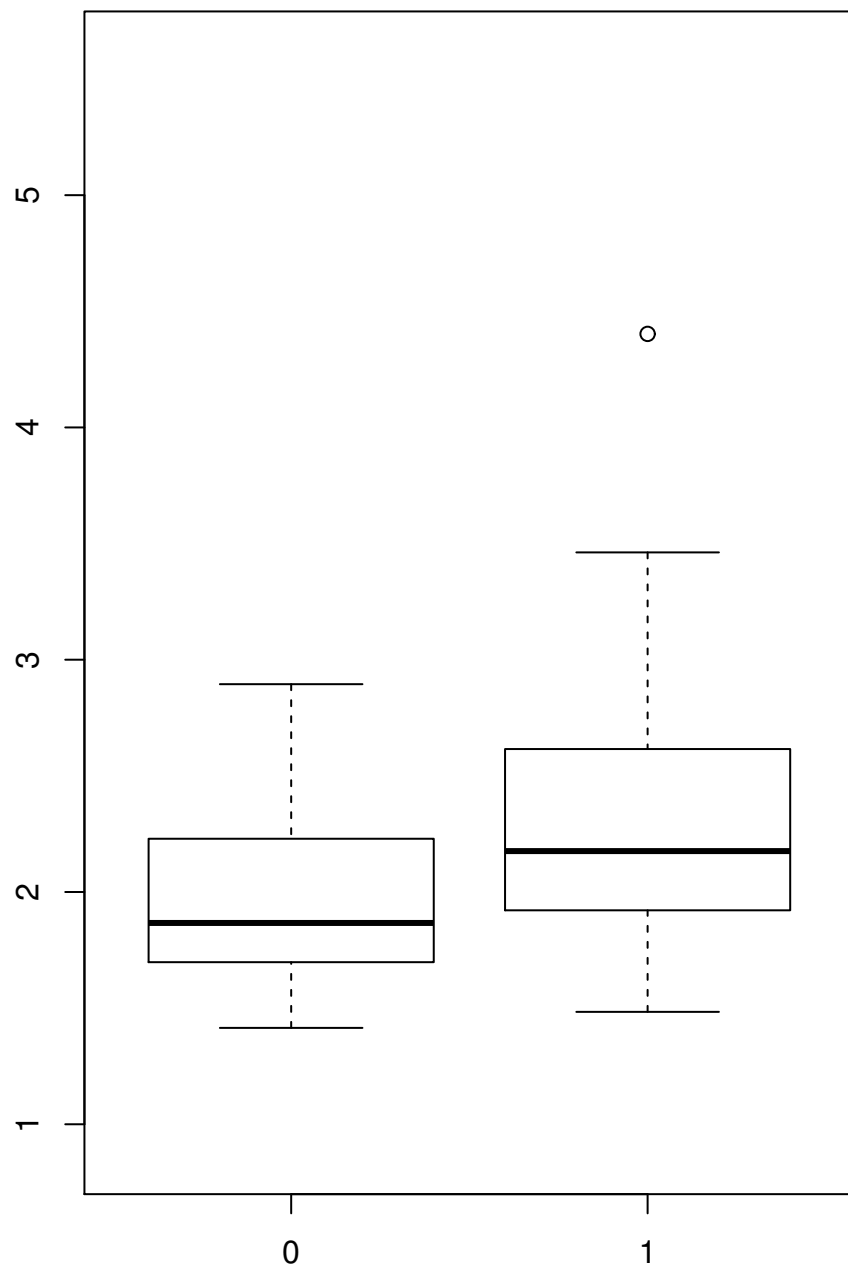

**hsa-miR-33b  
(GSE67139)**

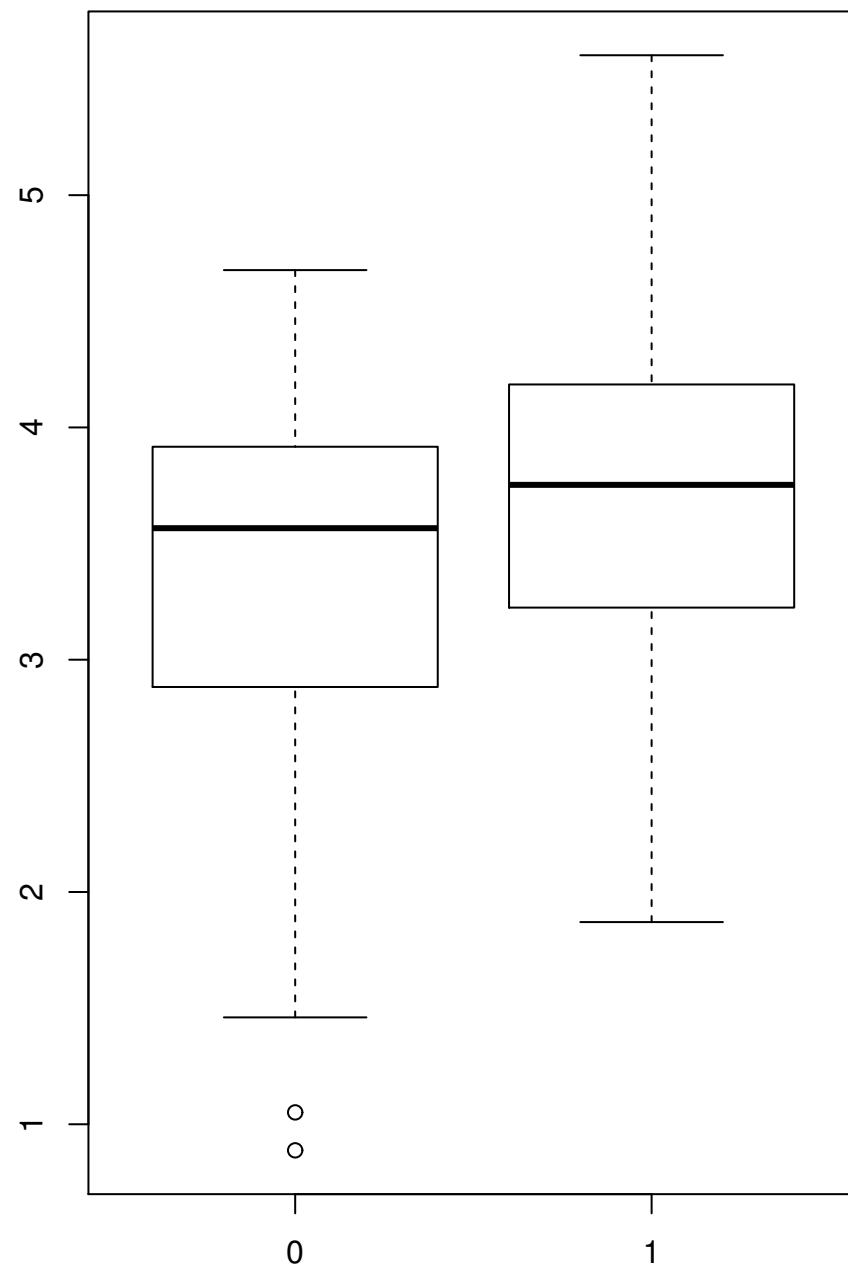

**hsa-miR-342-5p  
(GSE67138)**

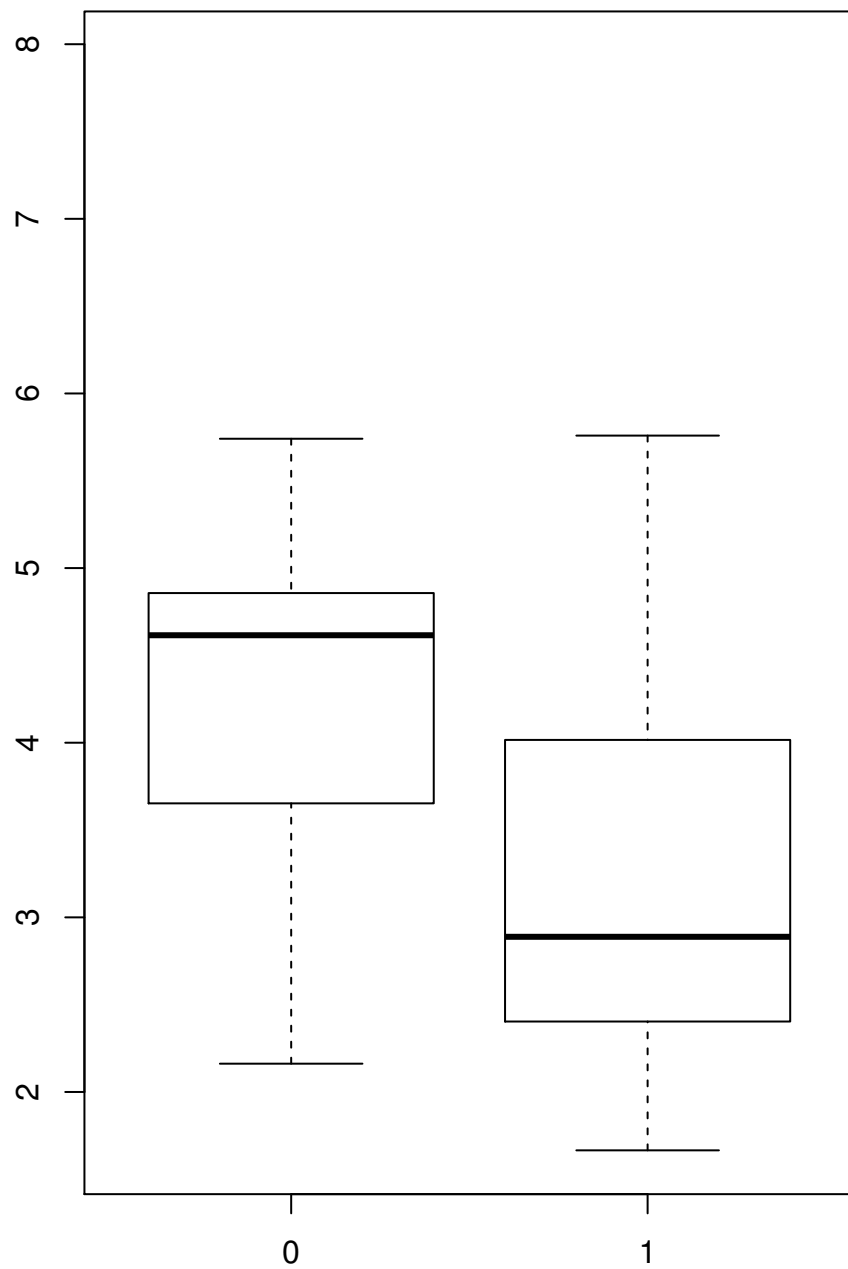

**hsa-miR-342-5p  
(GSE67139)**

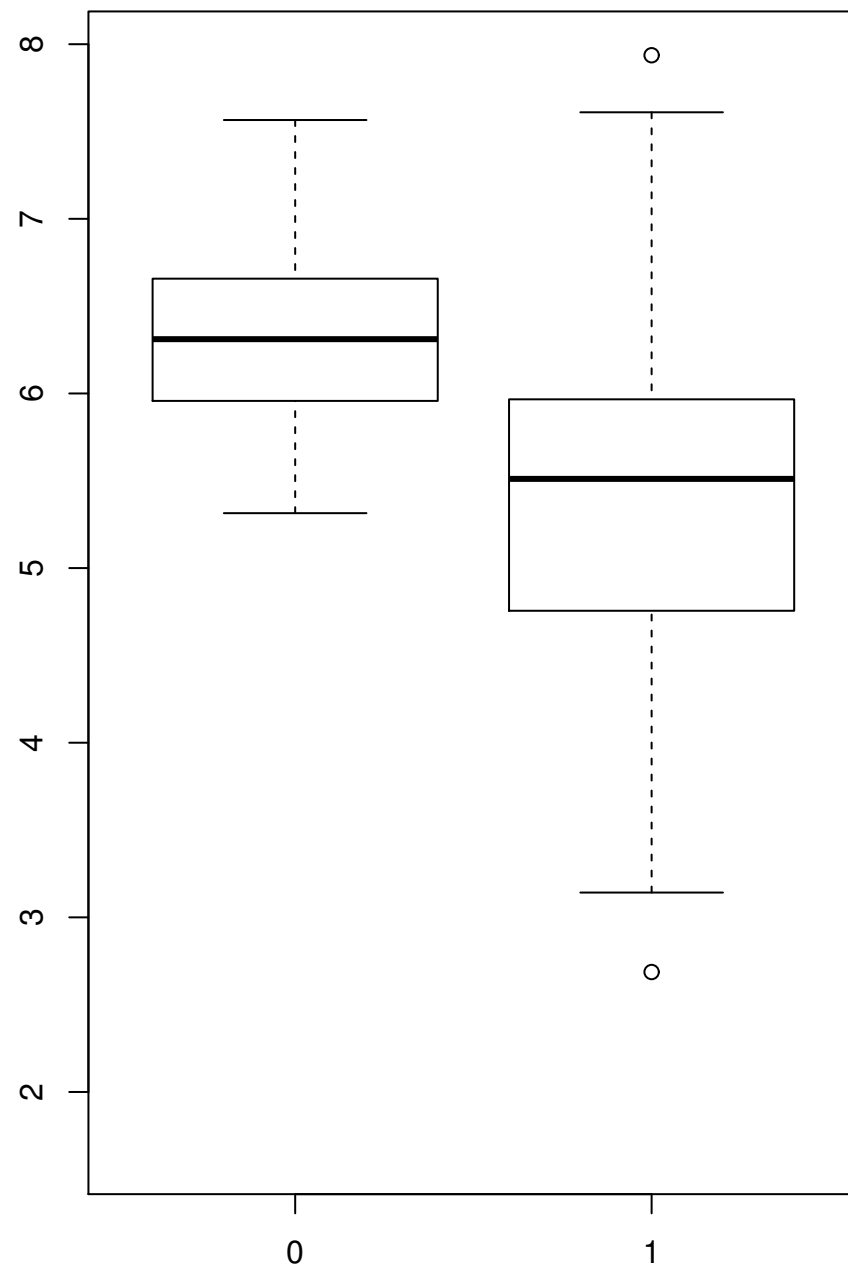

**hsa-miR-34a-star  
(GSE67138)**

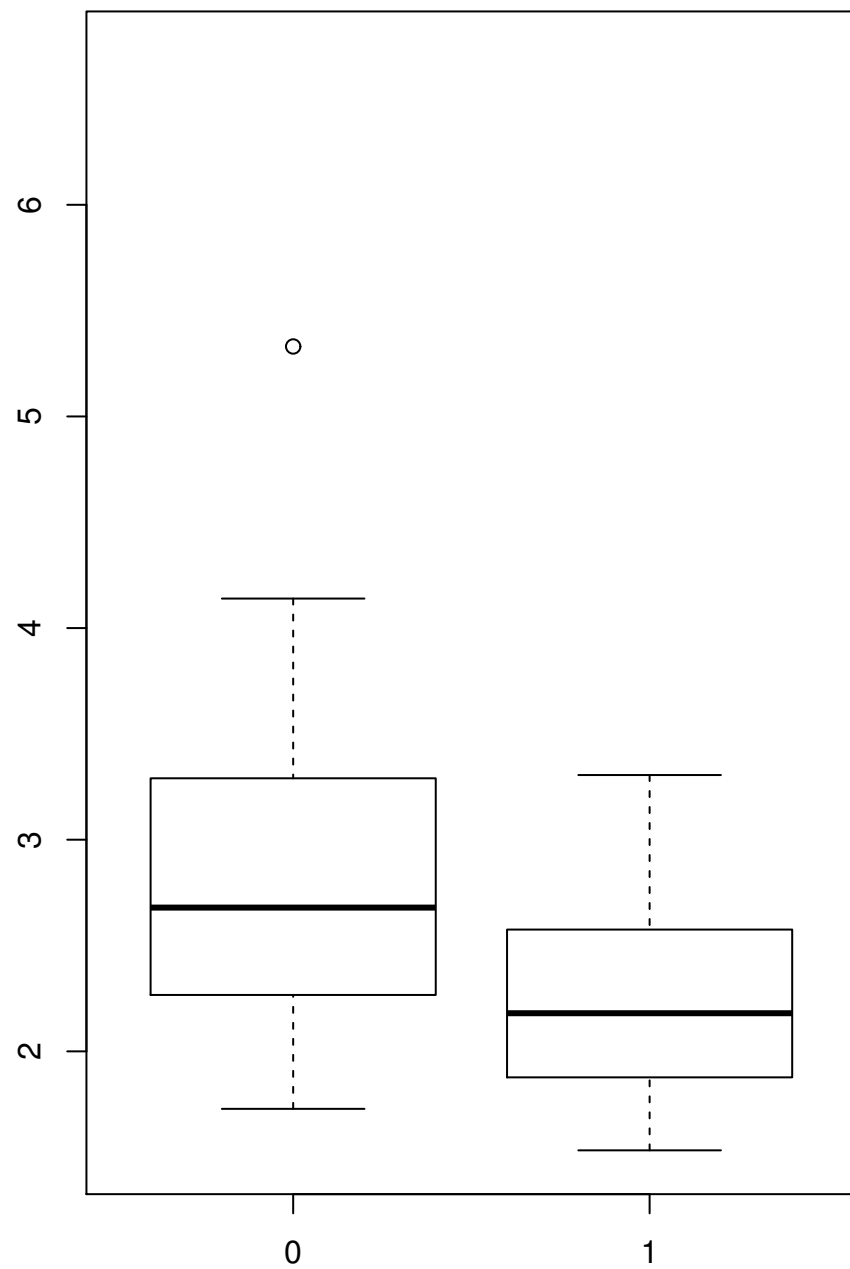

**hsa-miR-34a-star  
(GSE67139)**

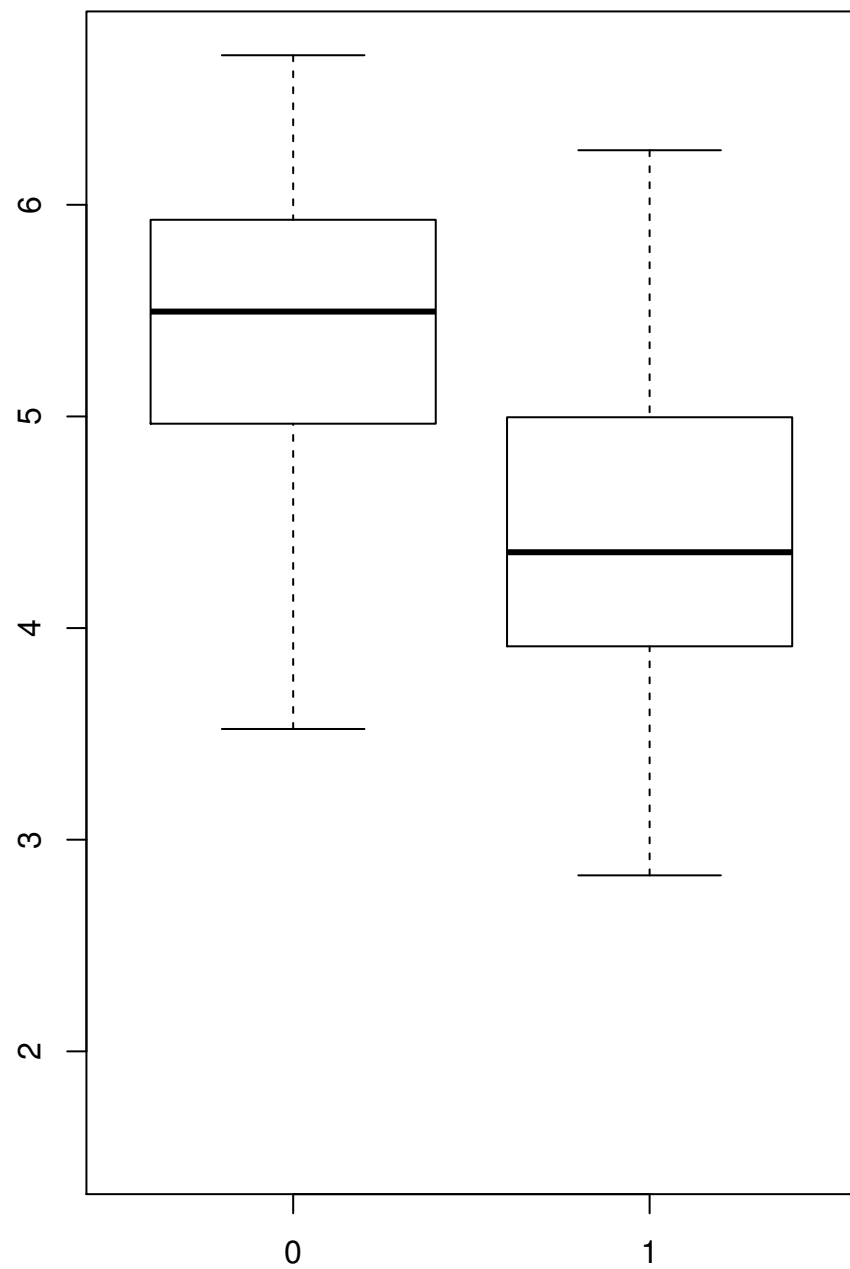

**hsa-miR-365  
(GSE67138)**

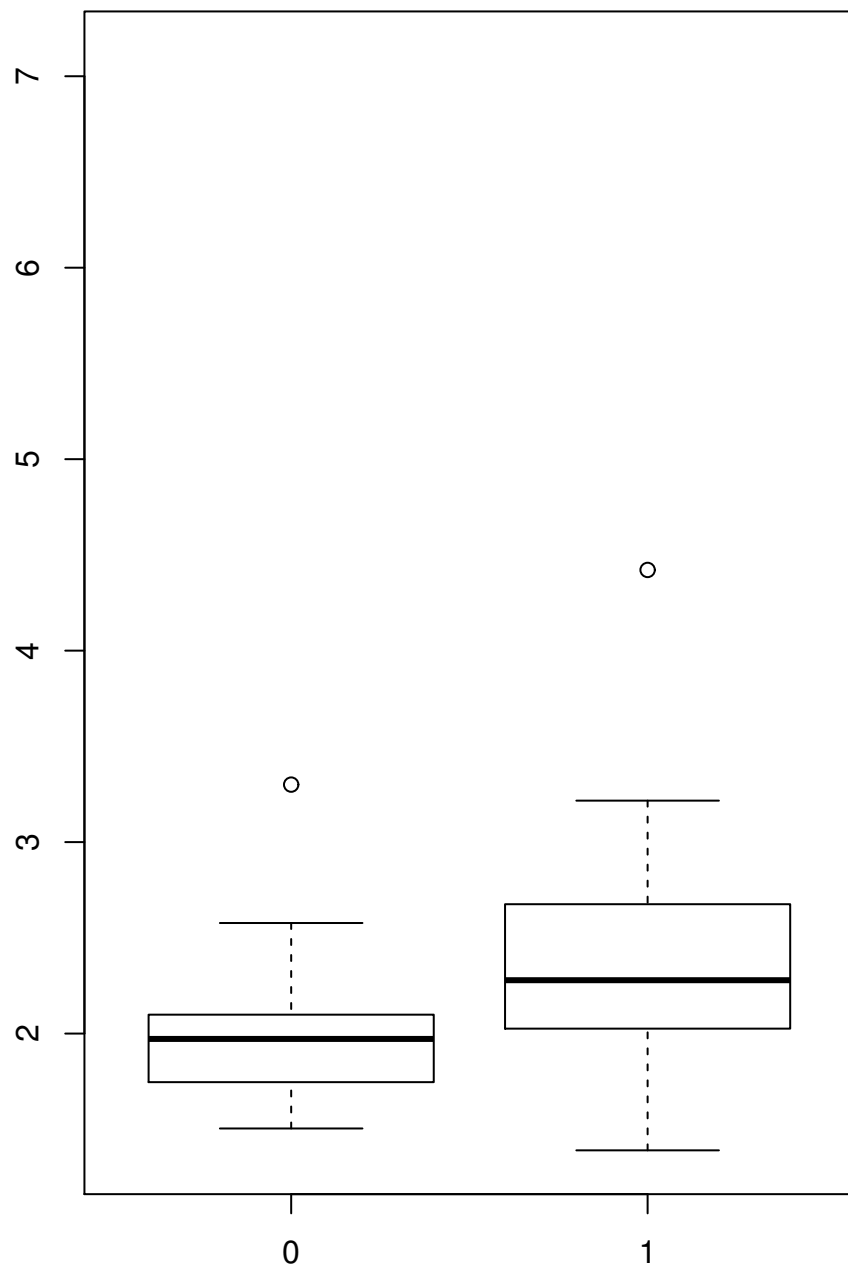

**hsa-miR-365  
(GSE67139)**

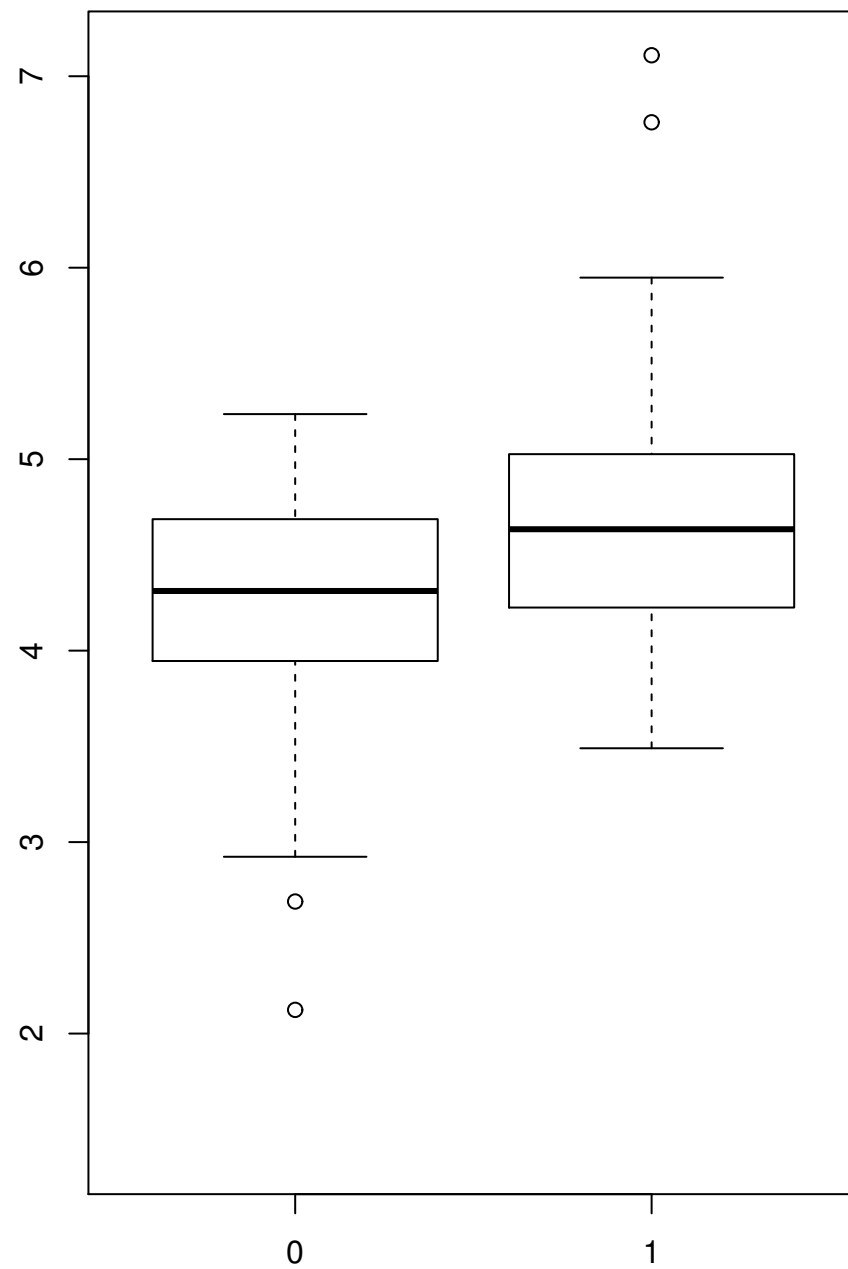

**hsa-miR-367-star**  
**(GSE67138)**

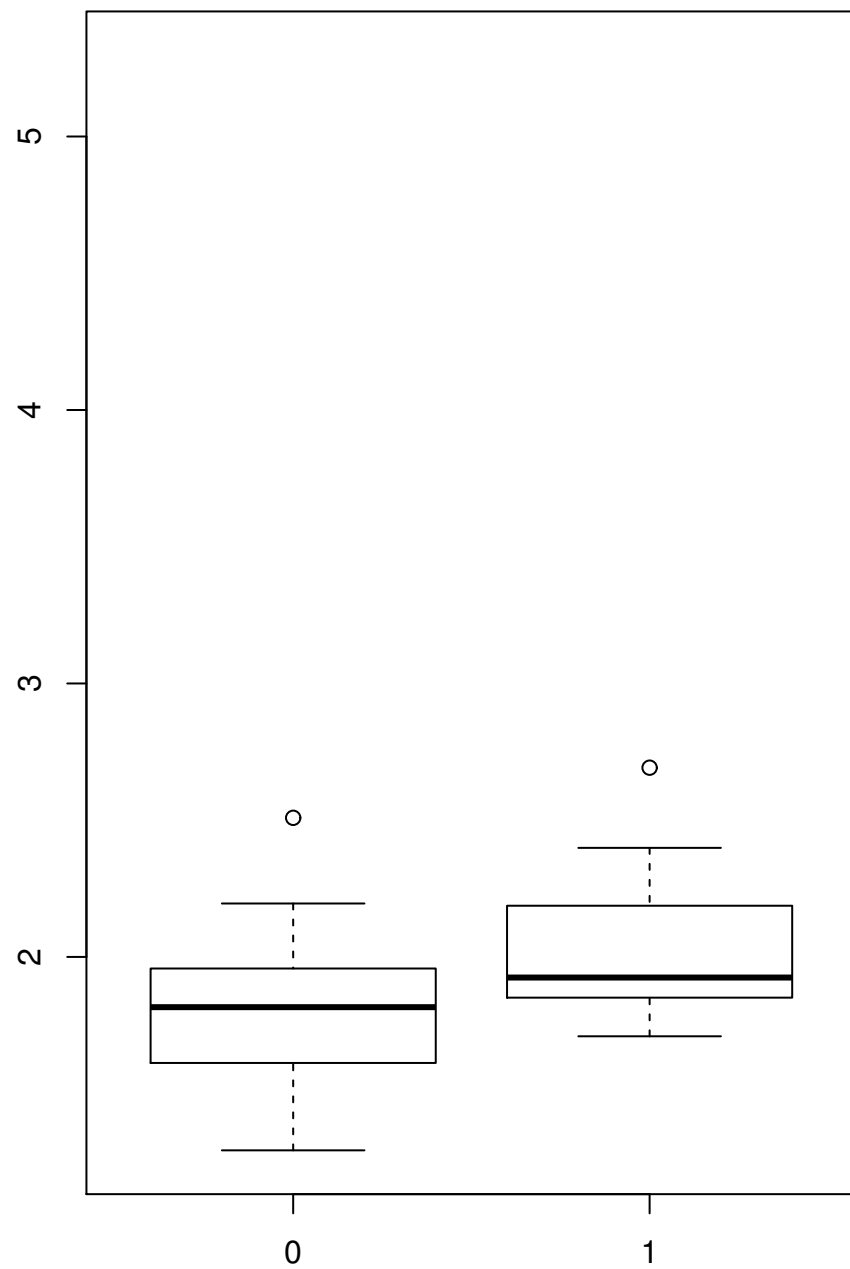

**hsa-miR-367-star**  
**(GSE67139)**

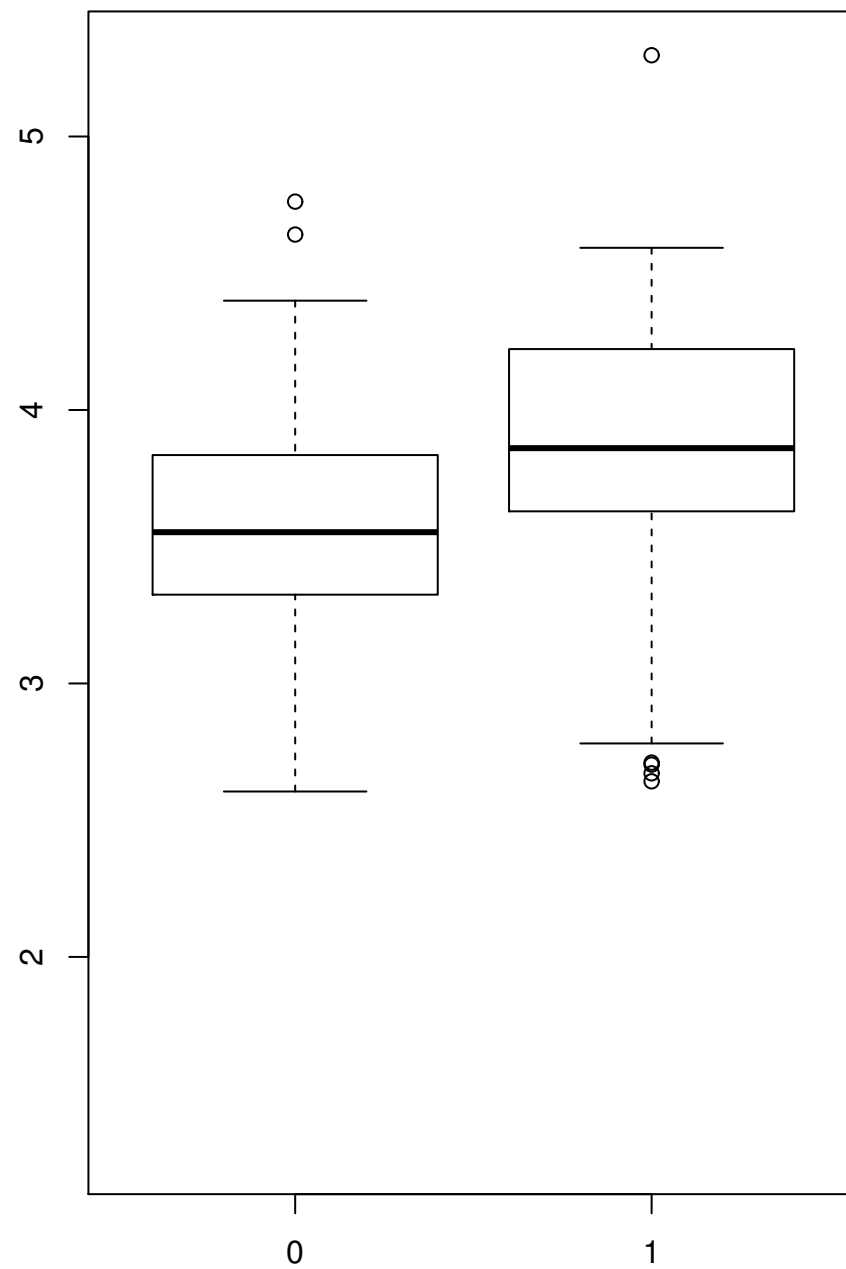

**hsa-miR-371-5p  
(GSE67138)**

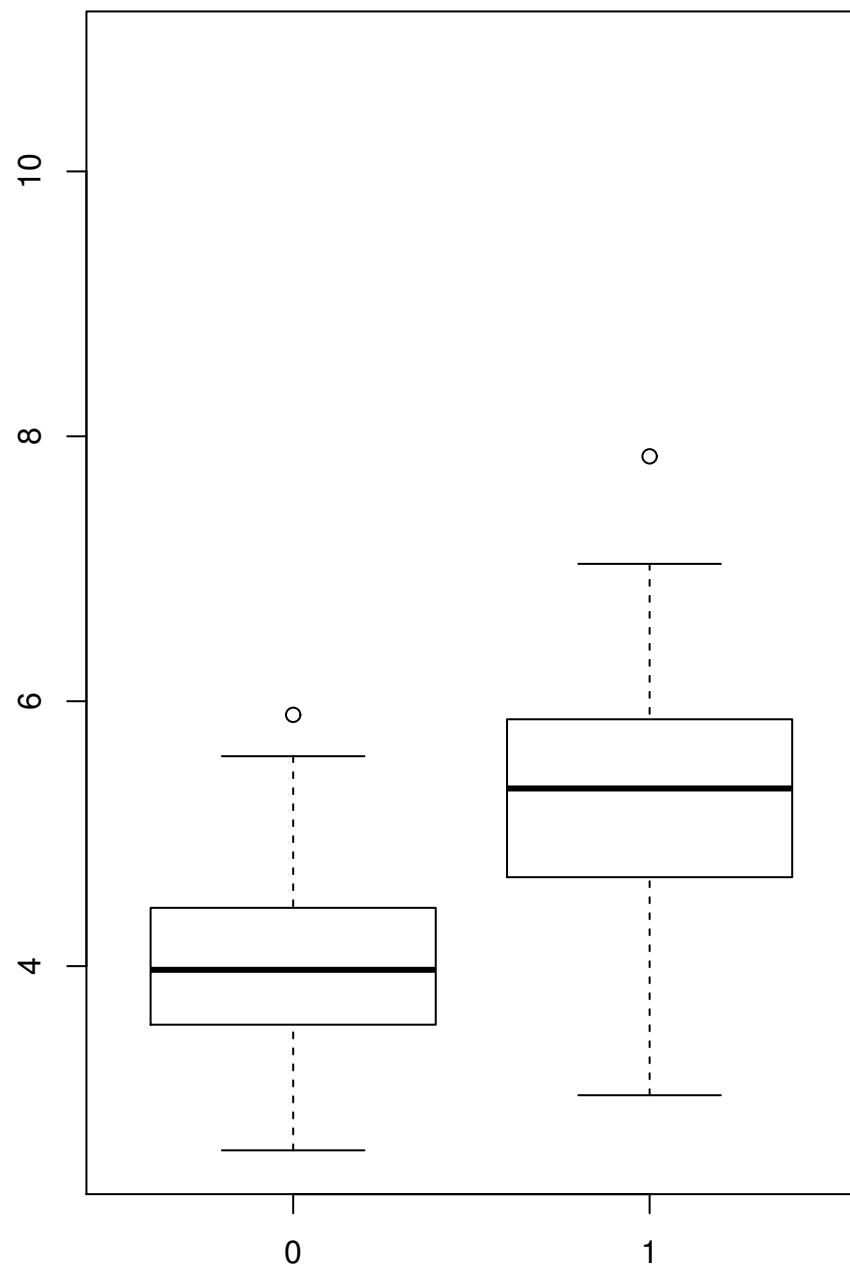

**hsa-miR-371-5p  
(GSE67139)**

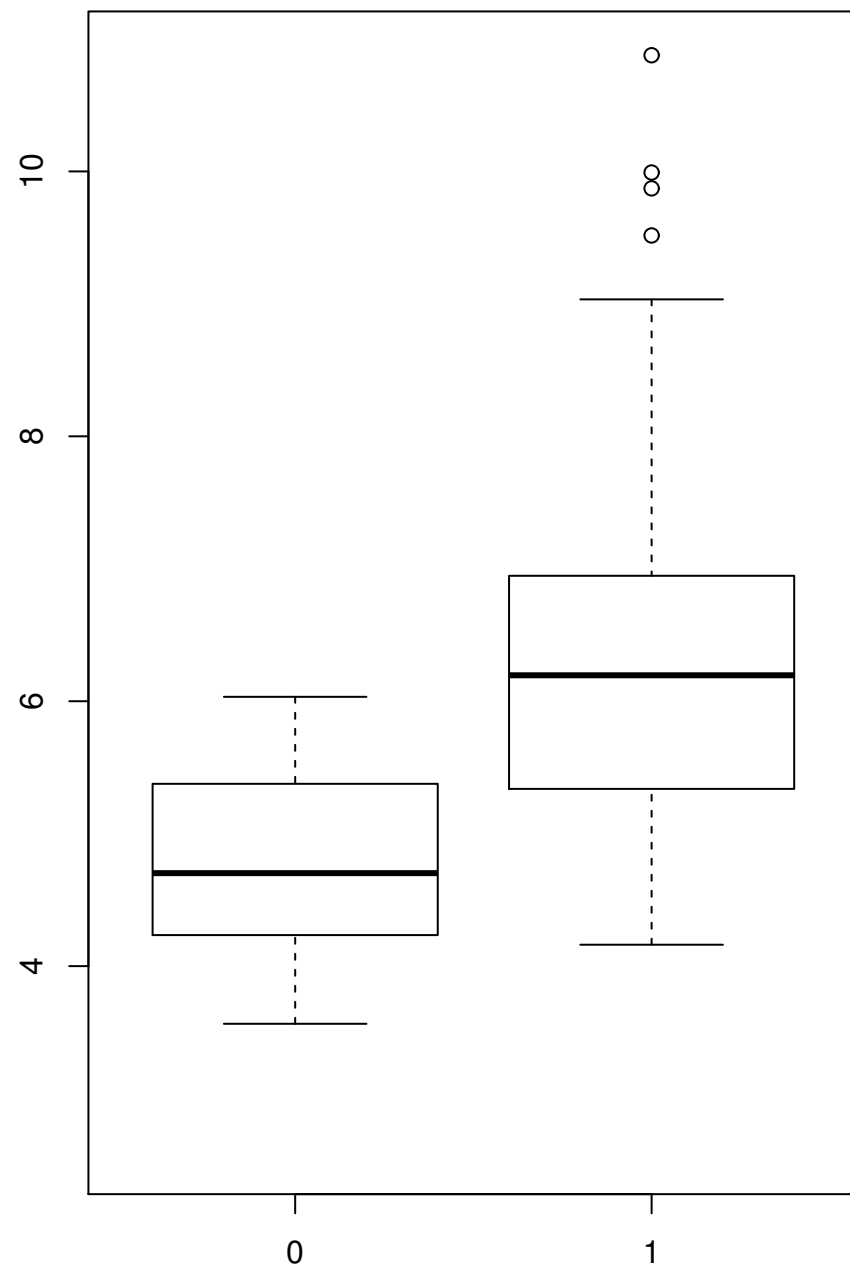



**hsa-miR-374a-star**  
**(GSE67138)**

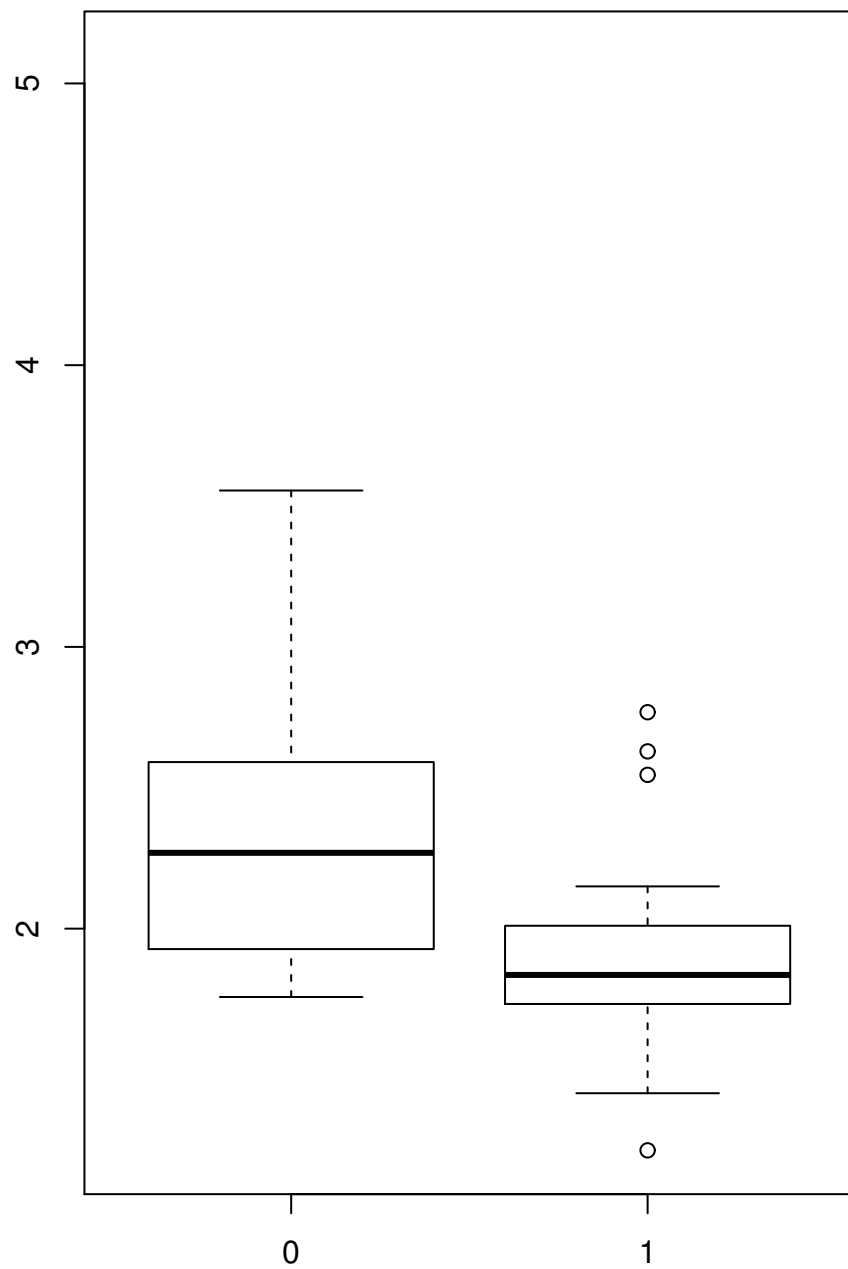

**hsa-miR-374a-star**  
**(GSE67139)**

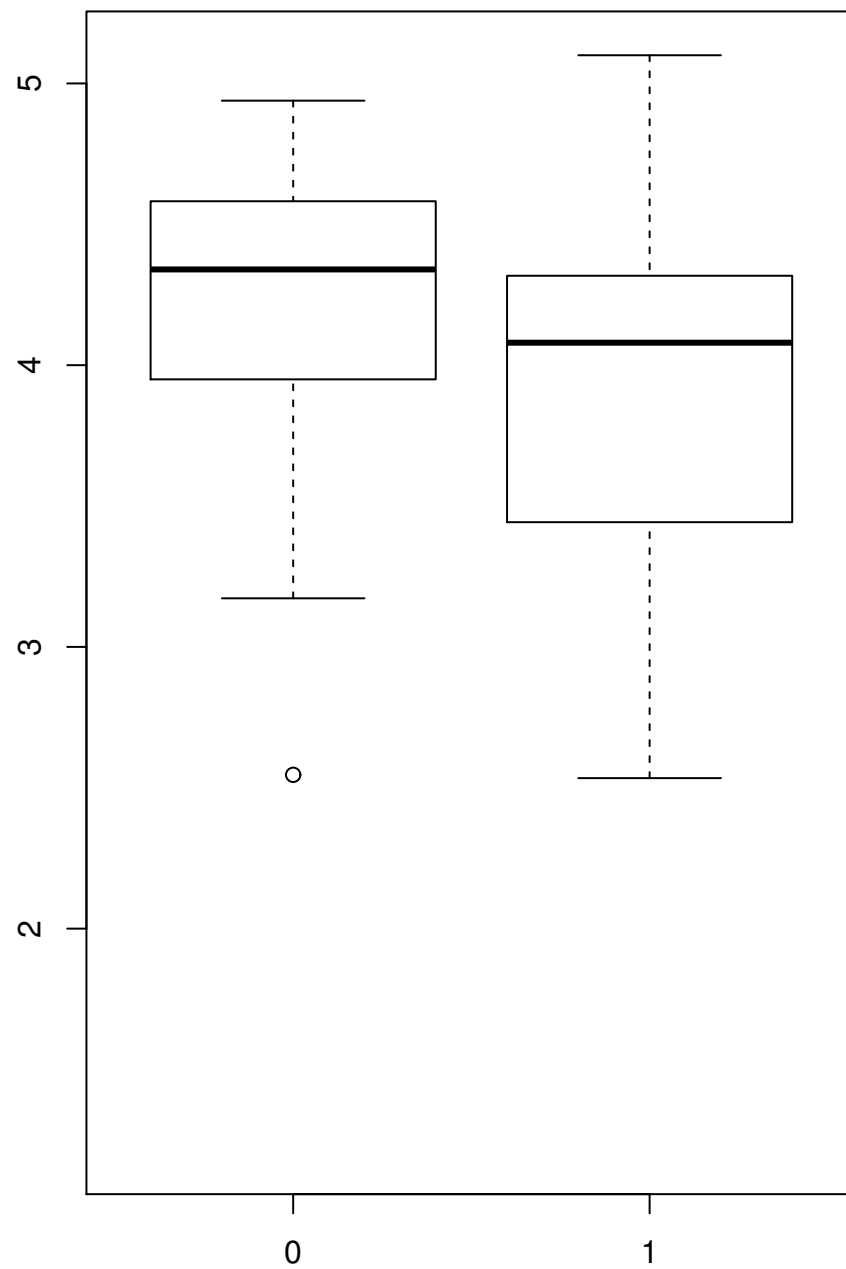

**hsa-miR-379**  
**(GSE67138)**

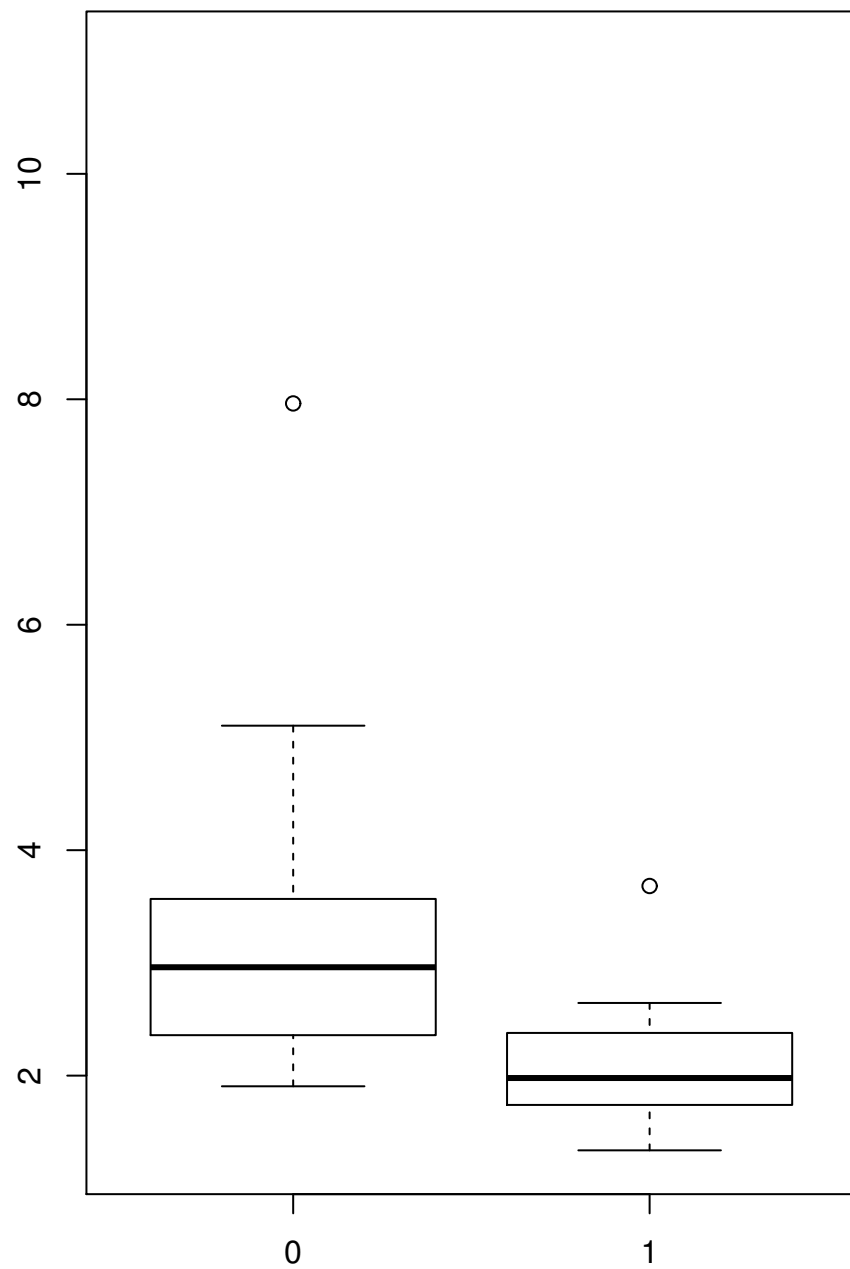

**hsa-miR-379**  
**(GSE67139)**

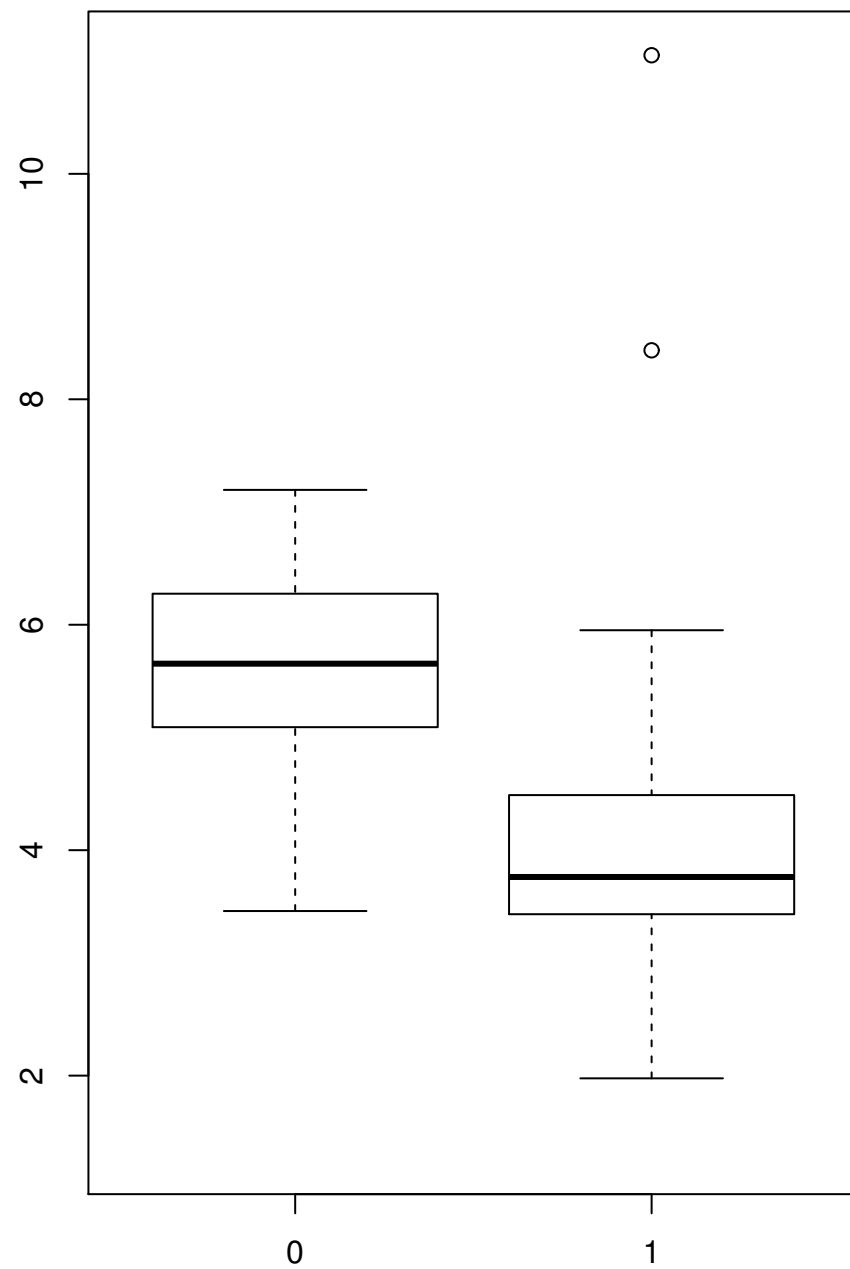

**hsa-miR-382  
(GSE67138)**

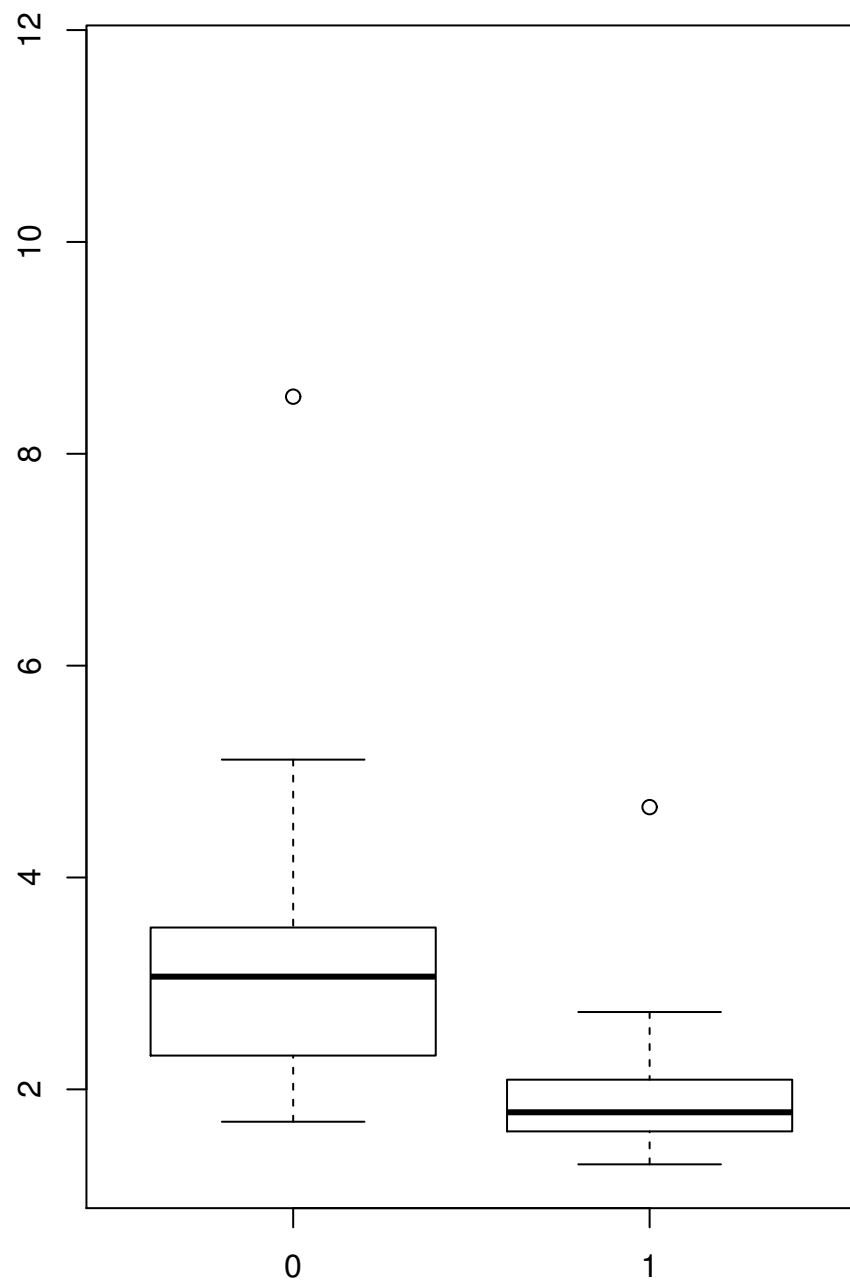

**hsa-miR-382  
(GSE67139)**

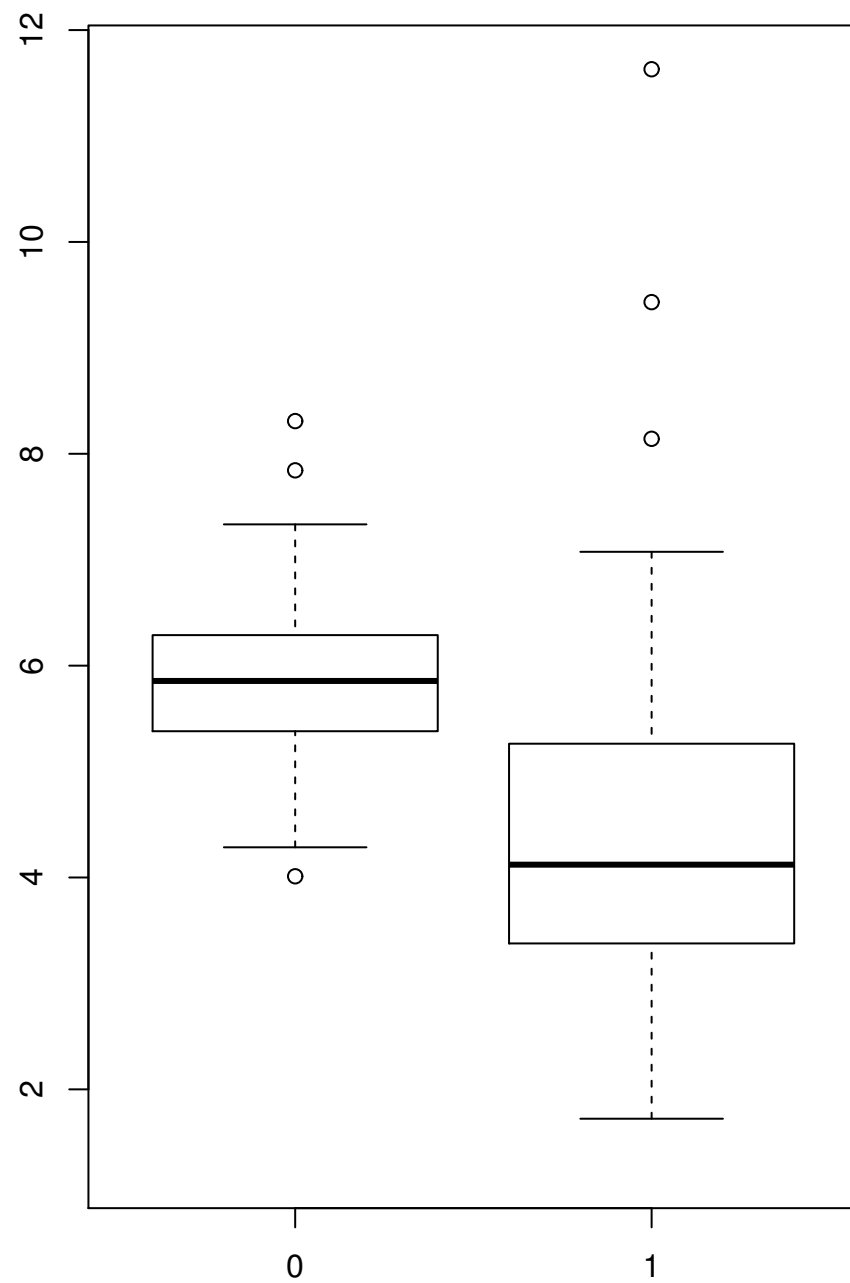

**hsa-miR-409-3p  
(GSE67138)**

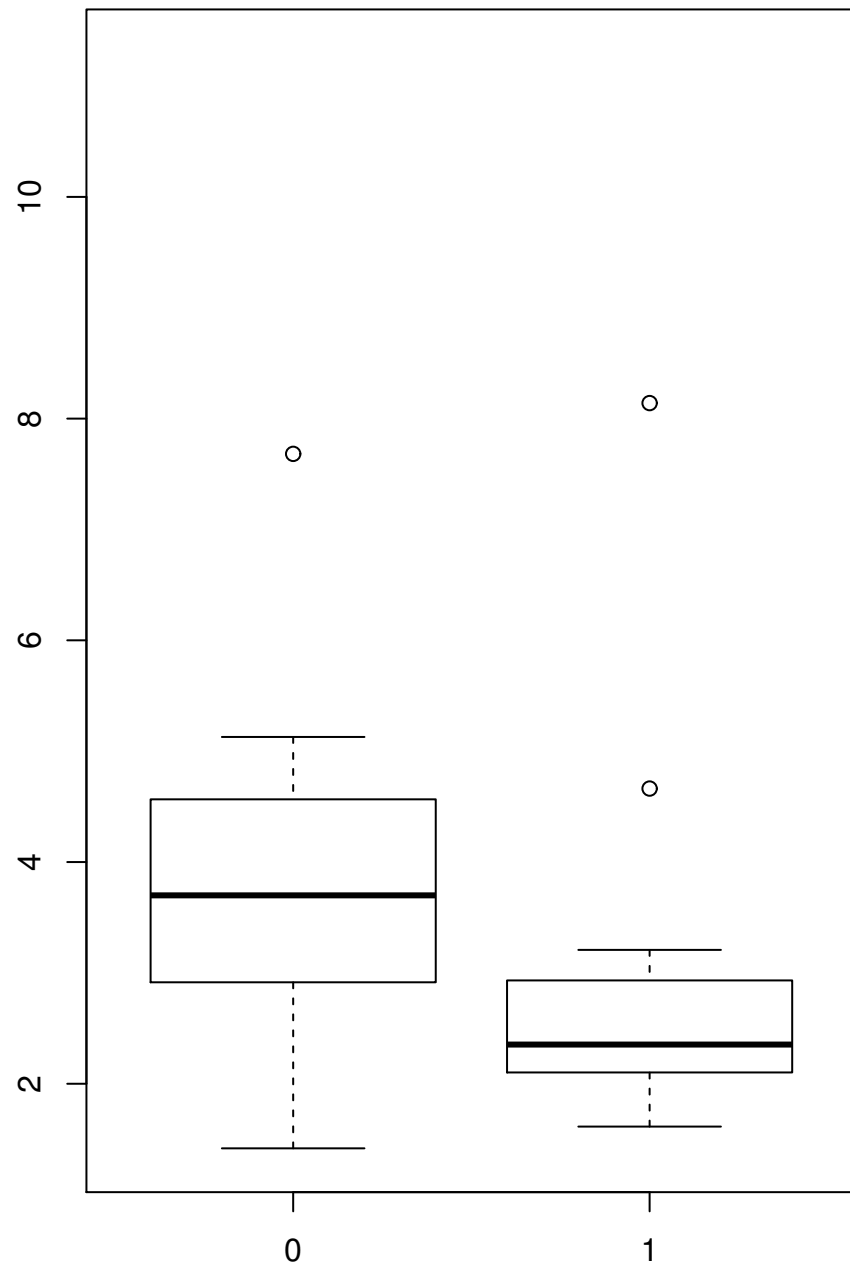

**hsa-miR-409-3p  
(GSE67139)**

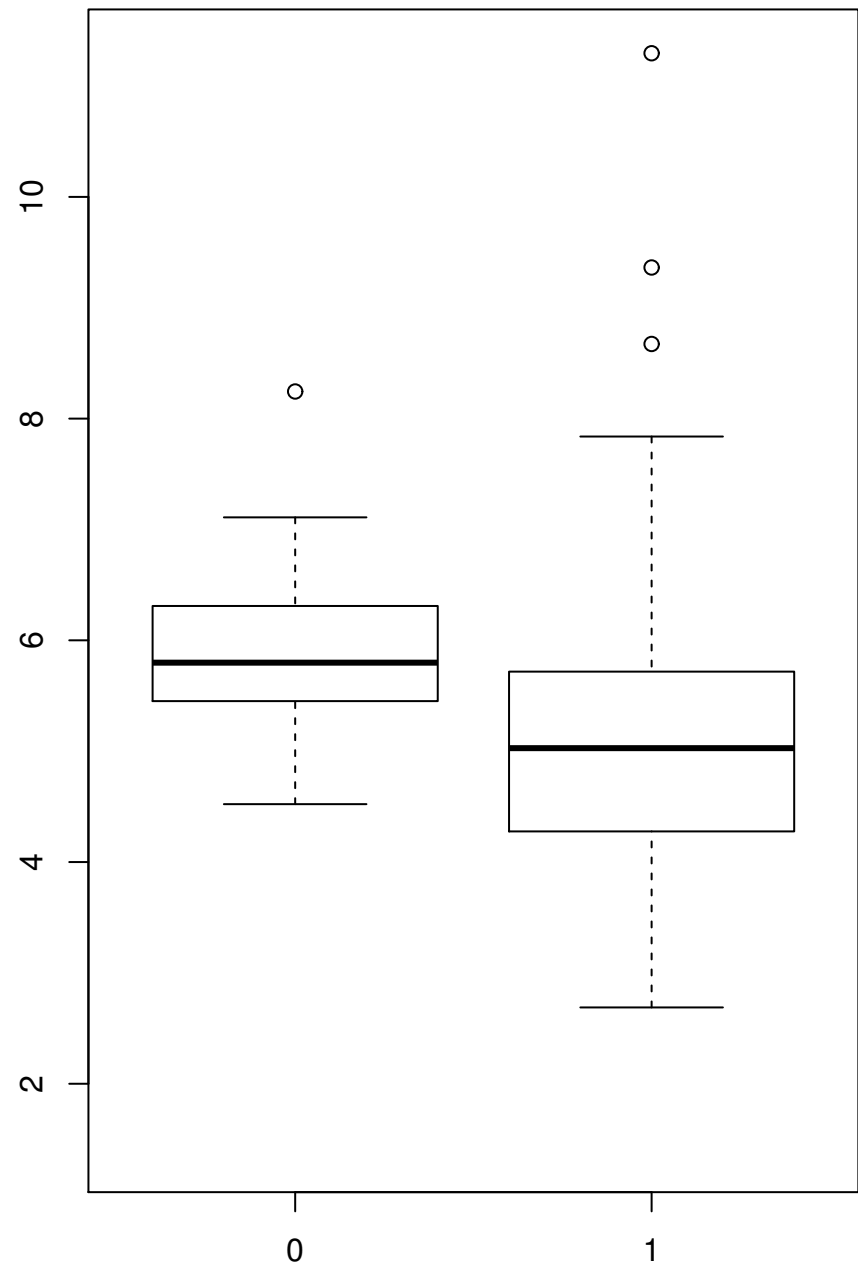

**hsa-miR-421  
(GSE67138)**

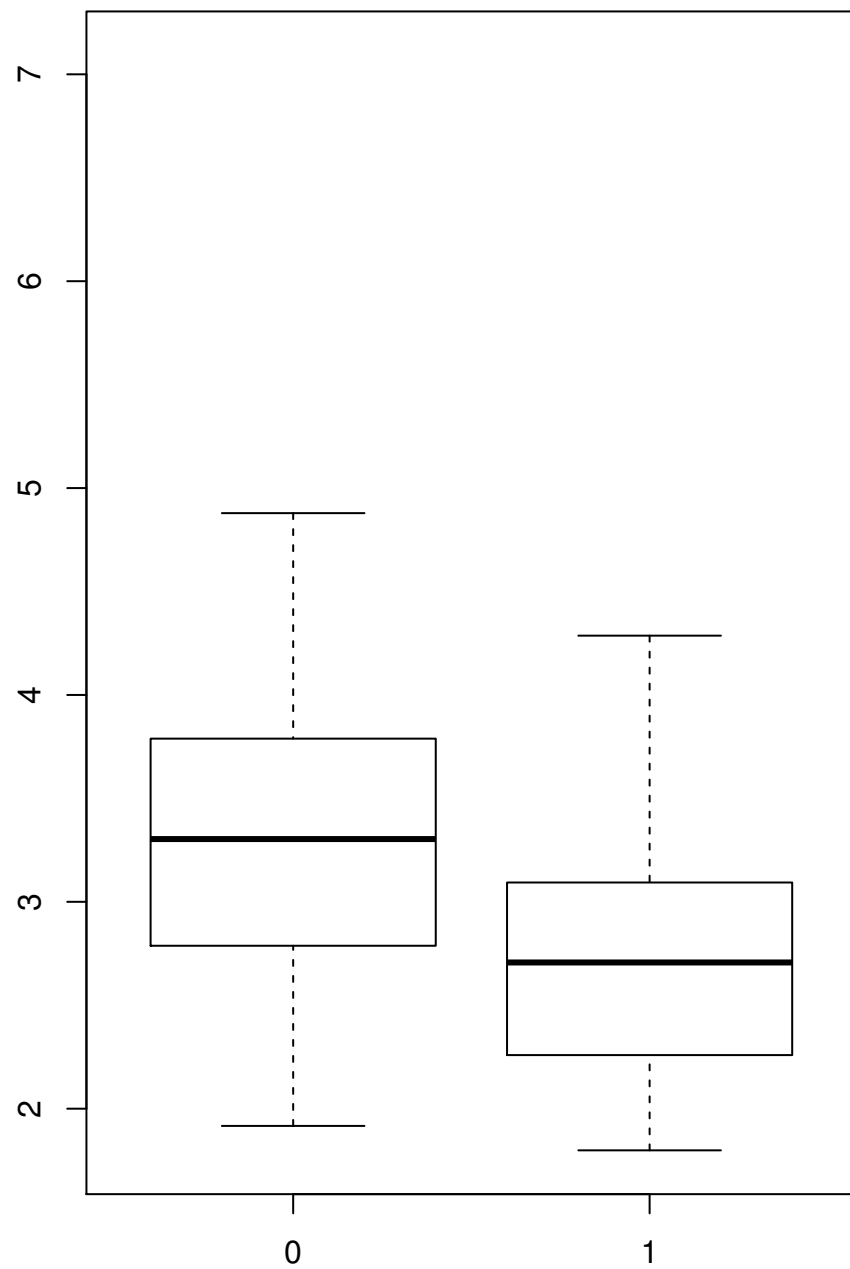

**hsa-miR-421  
(GSE67139)**

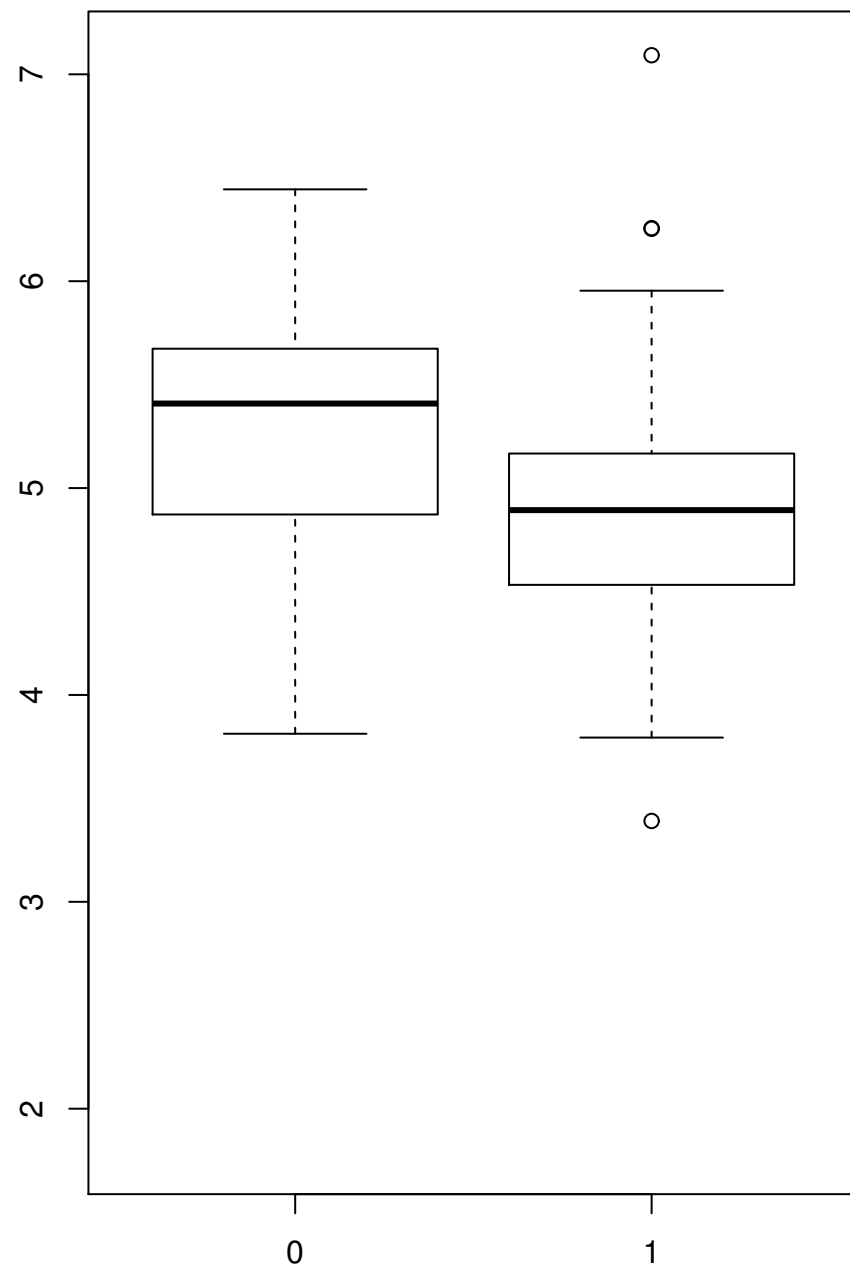

**hsa-miR-431-star**  
**(GSE67138)**

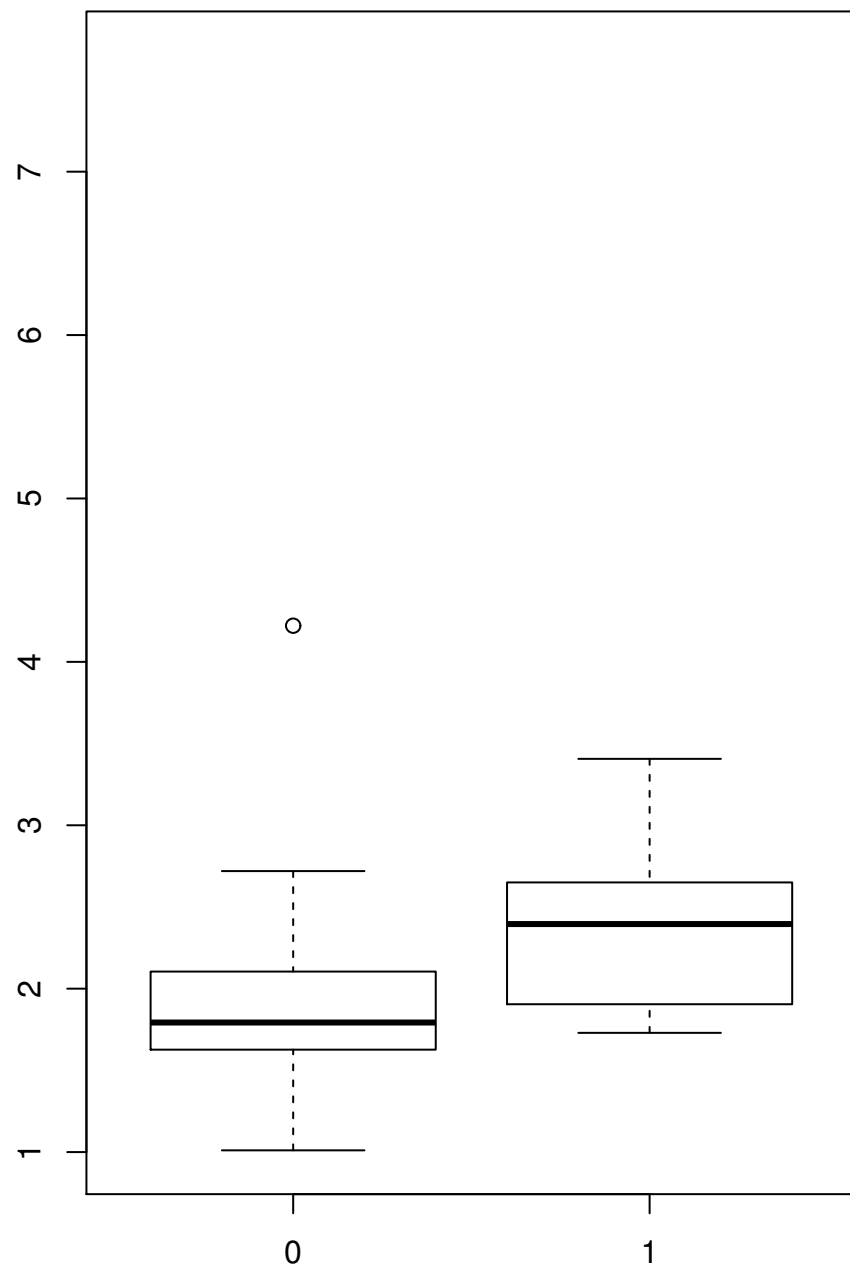

**hsa-miR-431-star**  
**(GSE67139)**

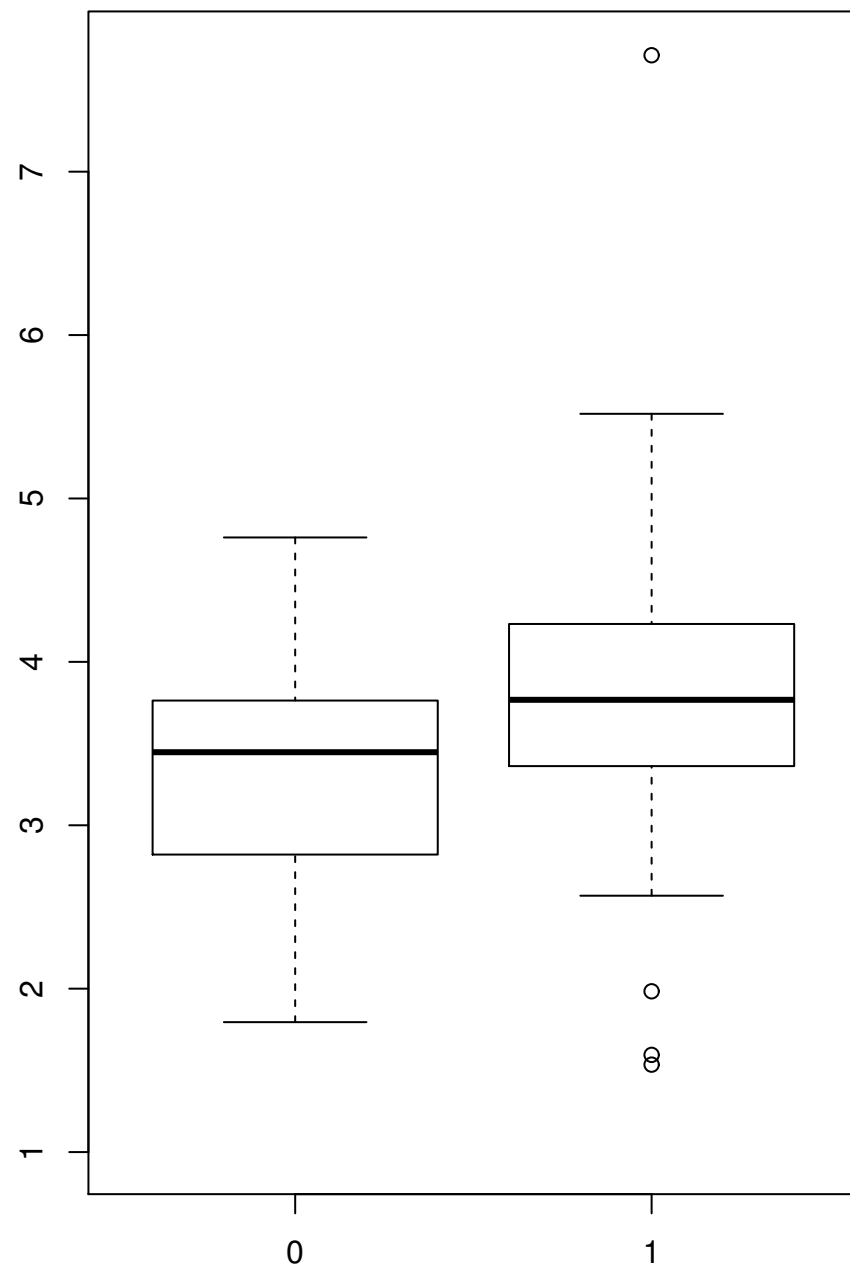

**hsa-miR-451  
(GSE67138)**

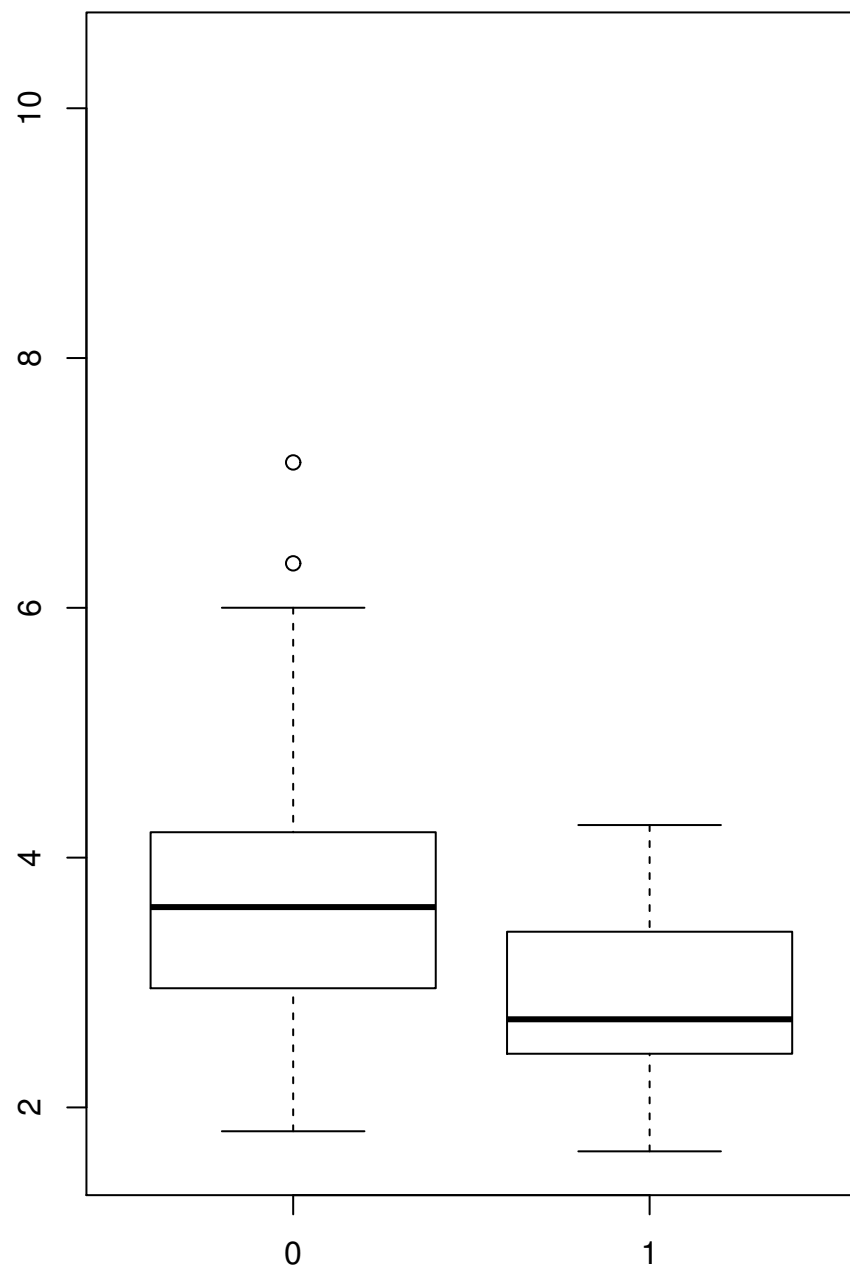

**hsa-miR-451  
(GSE67139)**

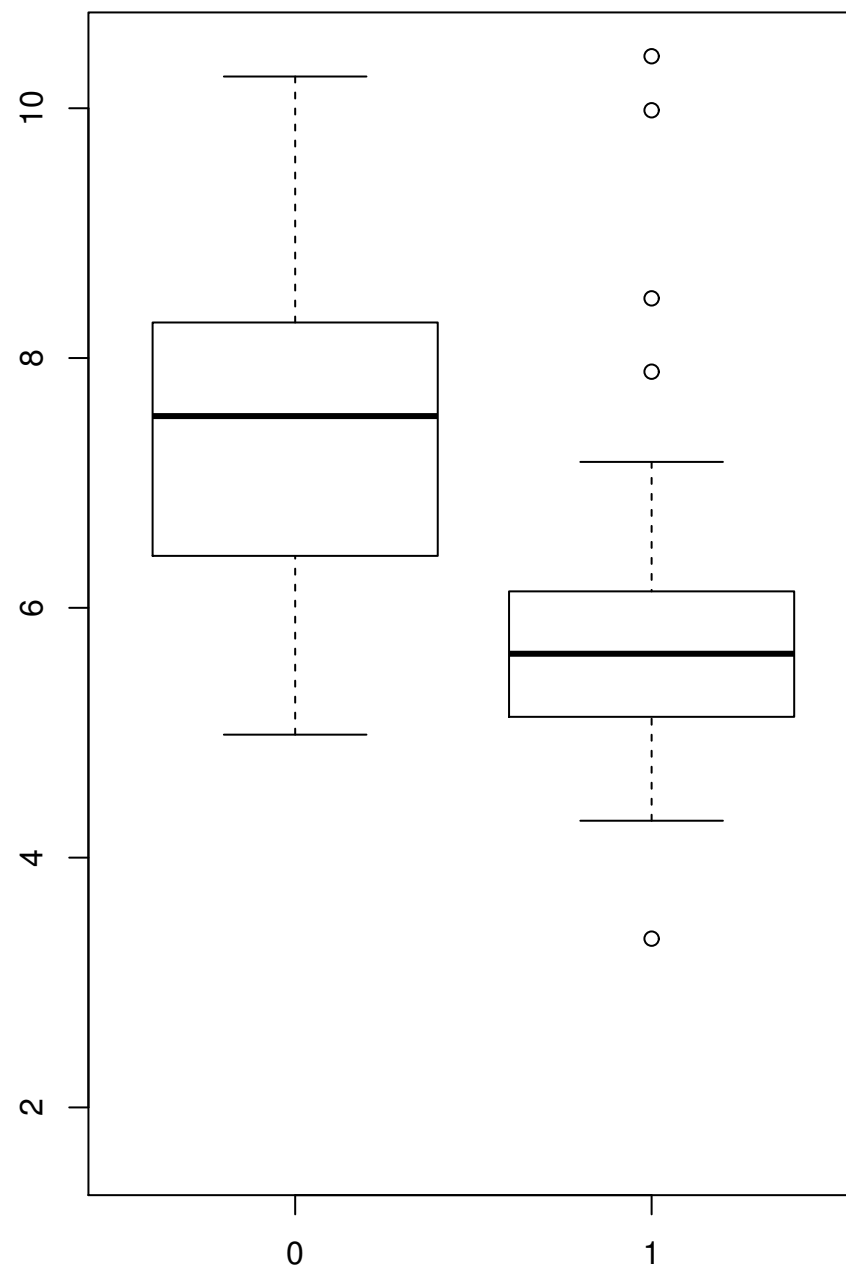

**hsa-miR-453**  
**(GSE67138)**

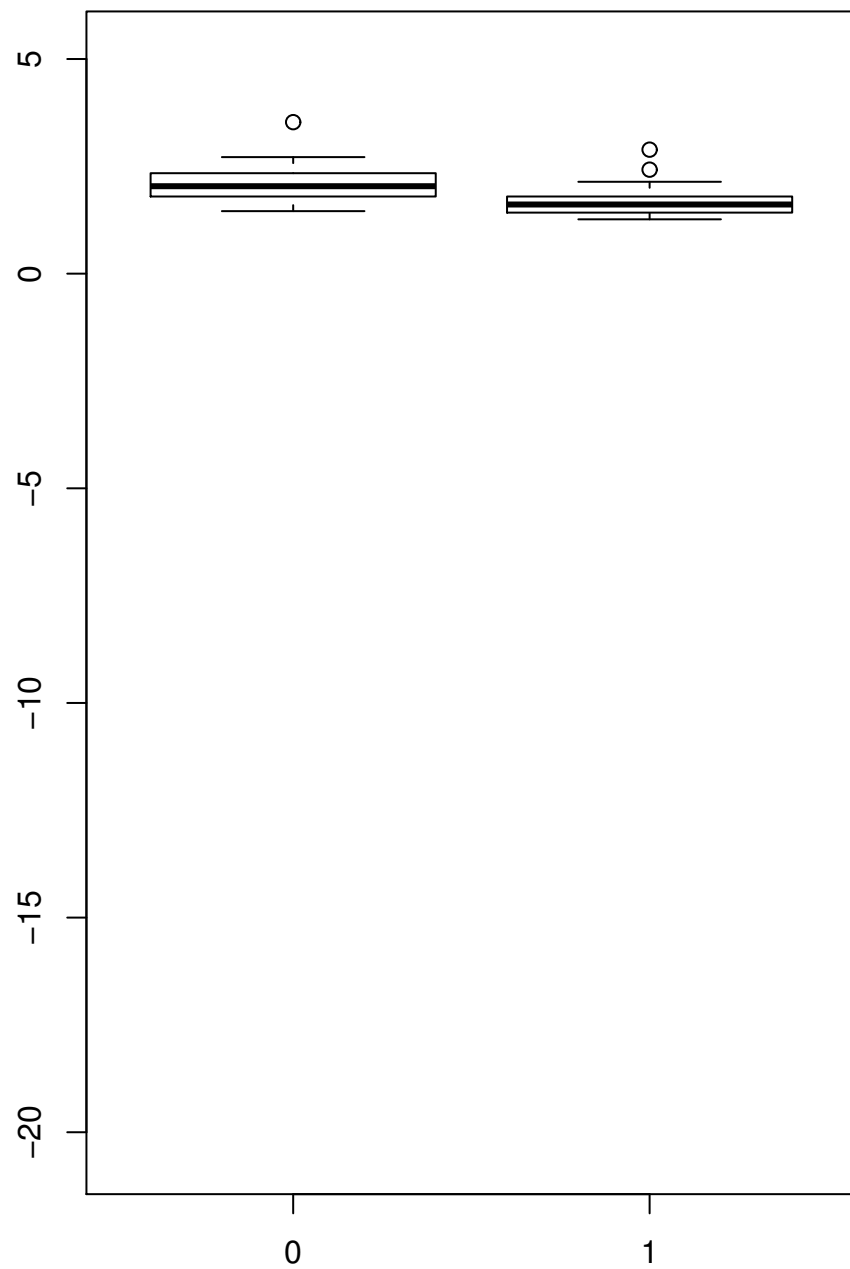

**hsa-miR-453**  
**(GSE67139)**

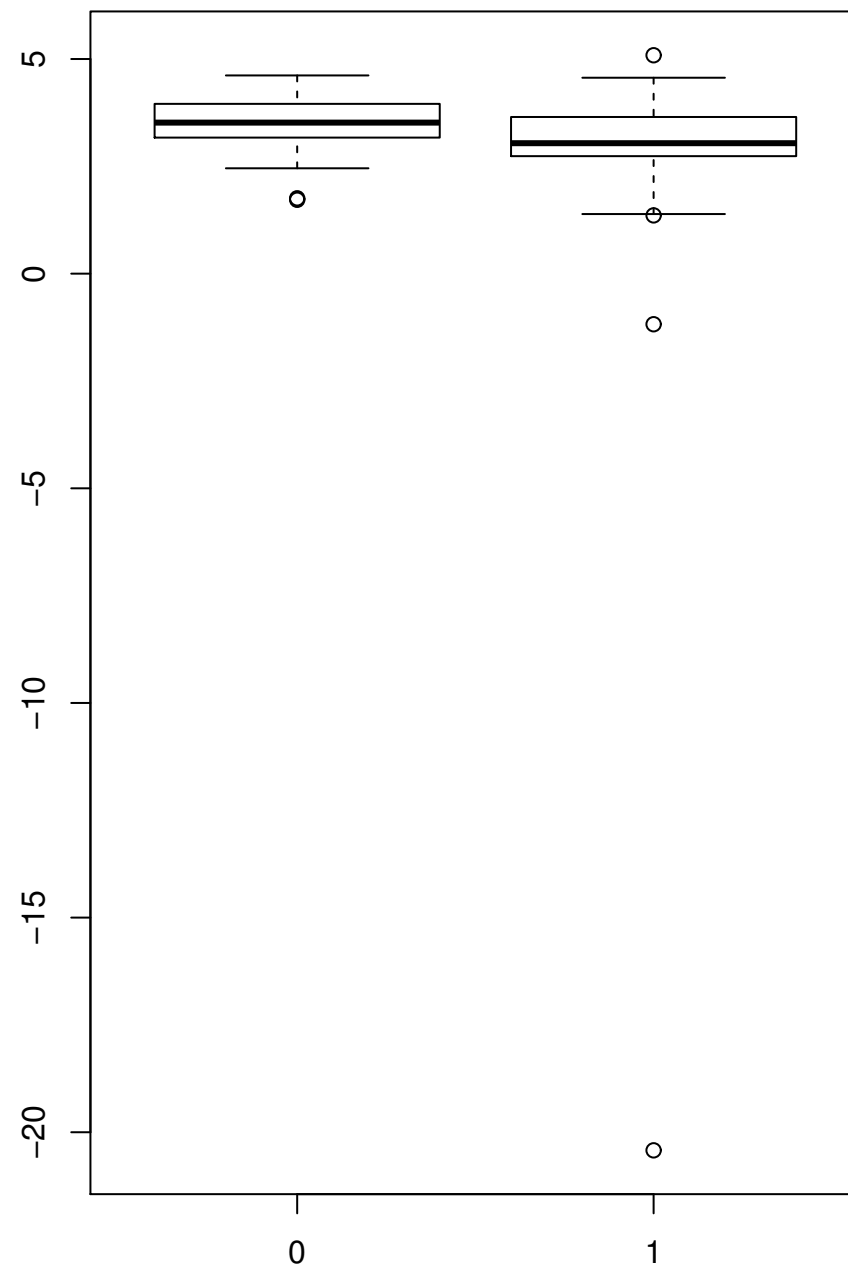



**hsa-miR-455-5p  
(GSE67138)**

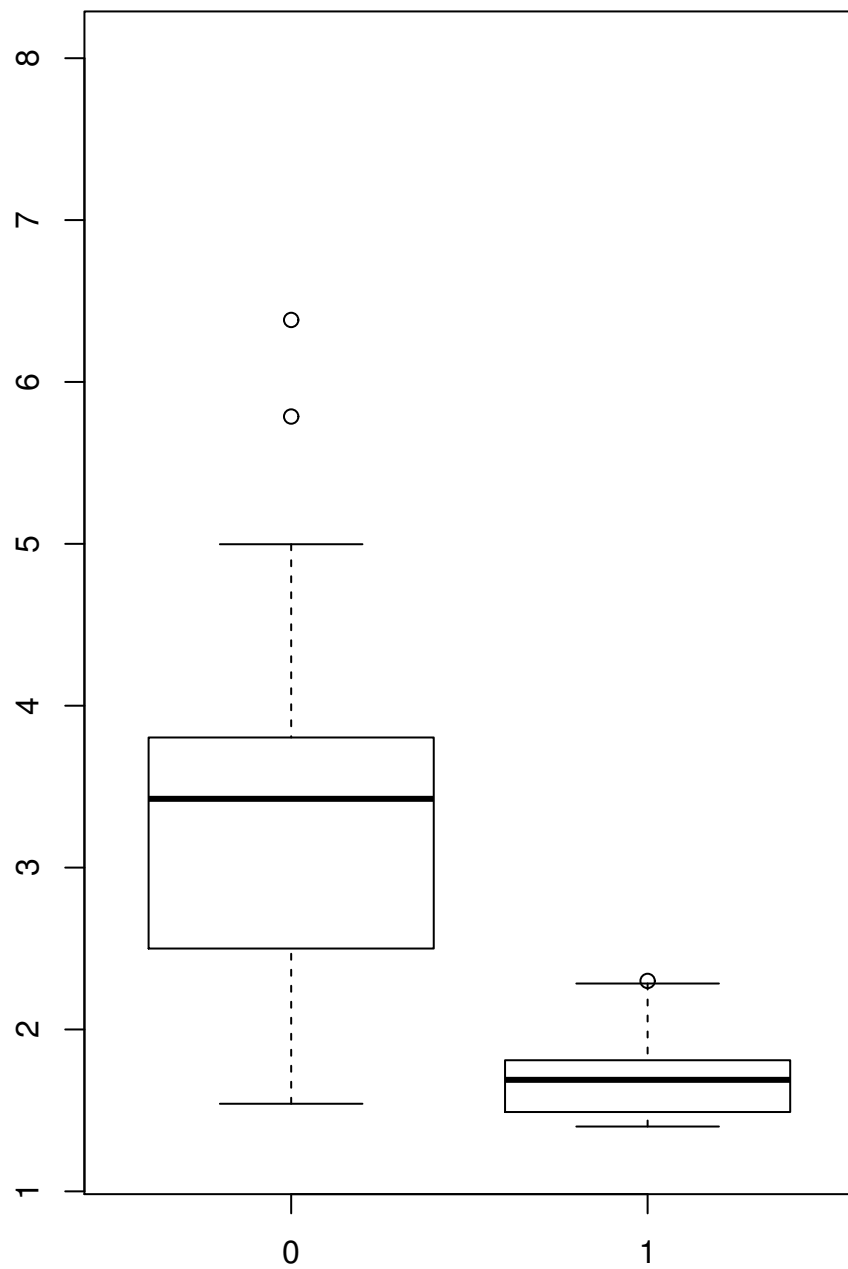

**hsa-miR-455-5p  
(GSE67139)**

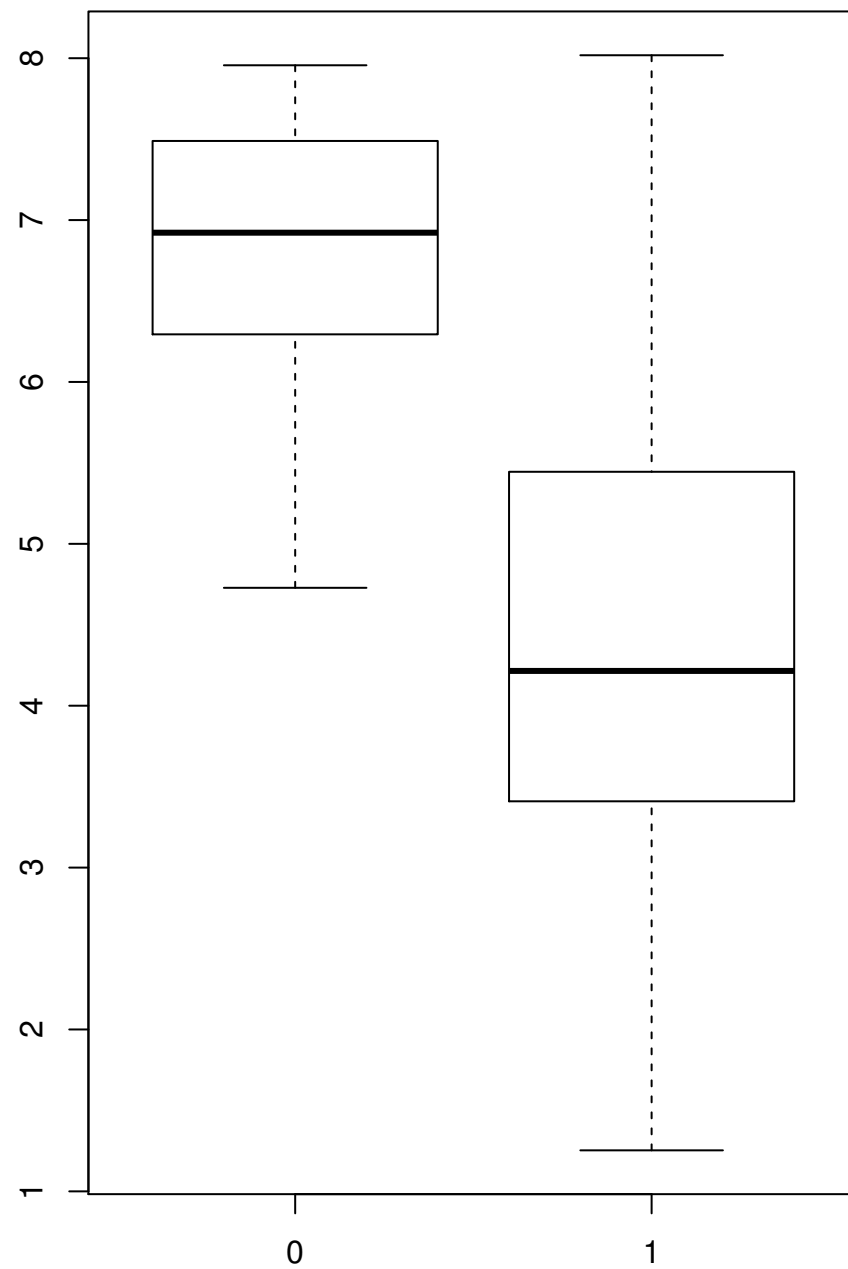

**hsa-miR-483-5p  
(GSE67138)**

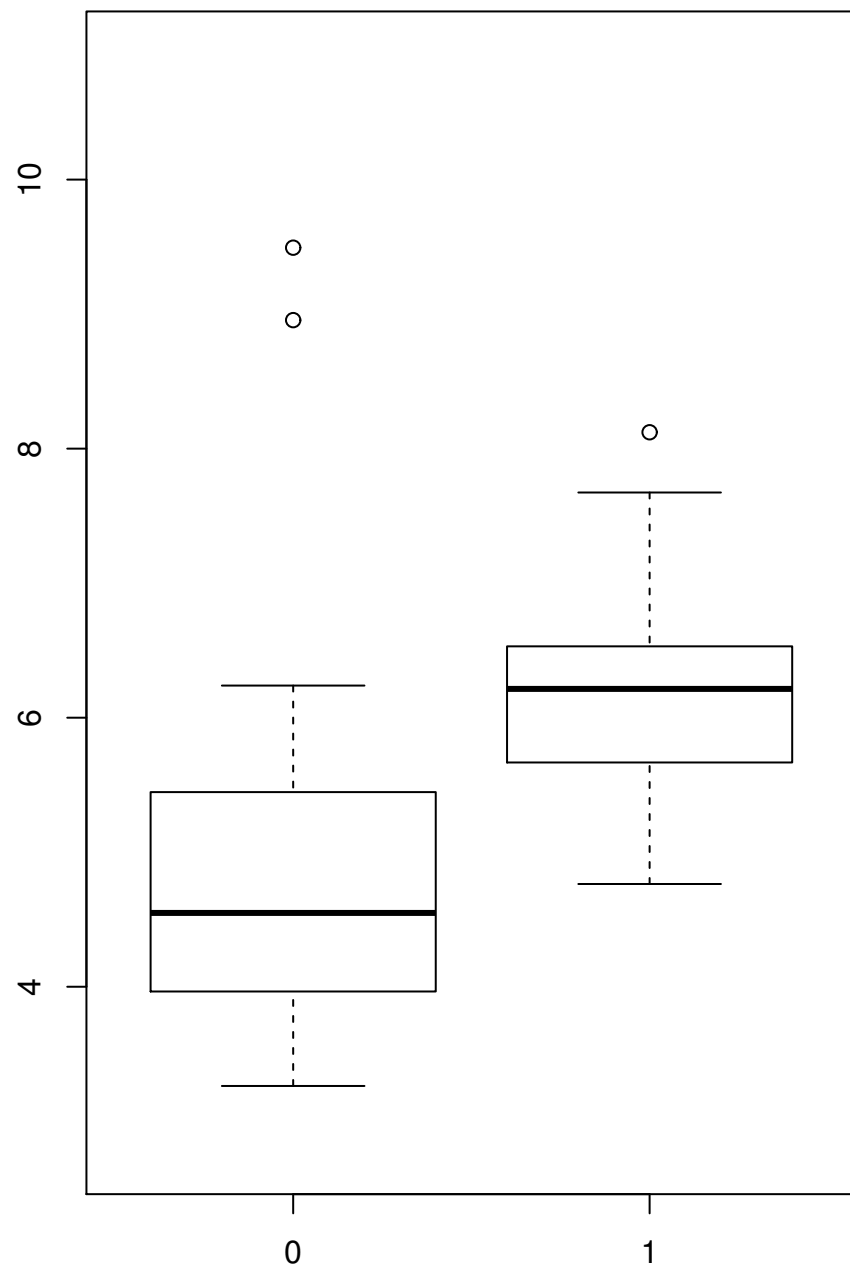

**hsa-miR-483-5p  
(GSE67139)**

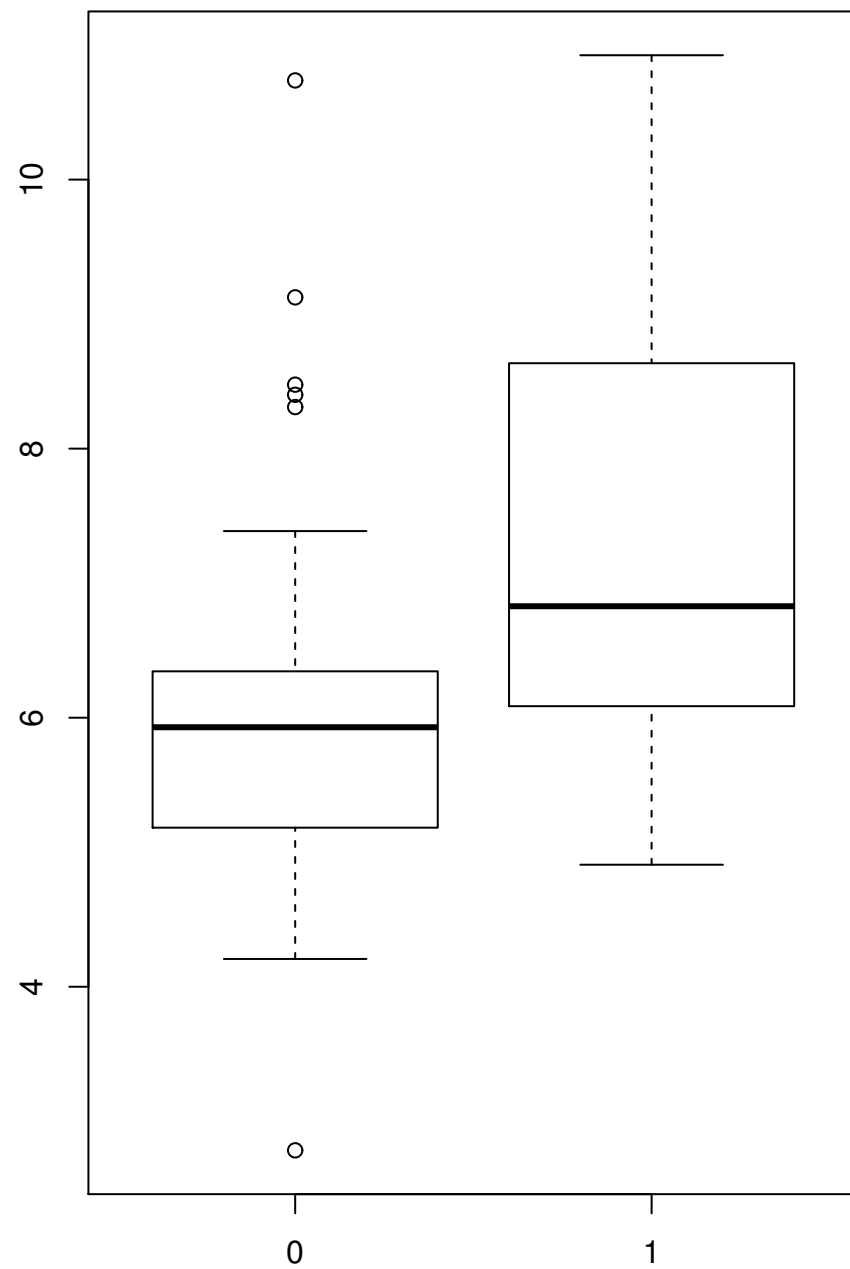

**hsa-miR-488  
(GSE67138)**

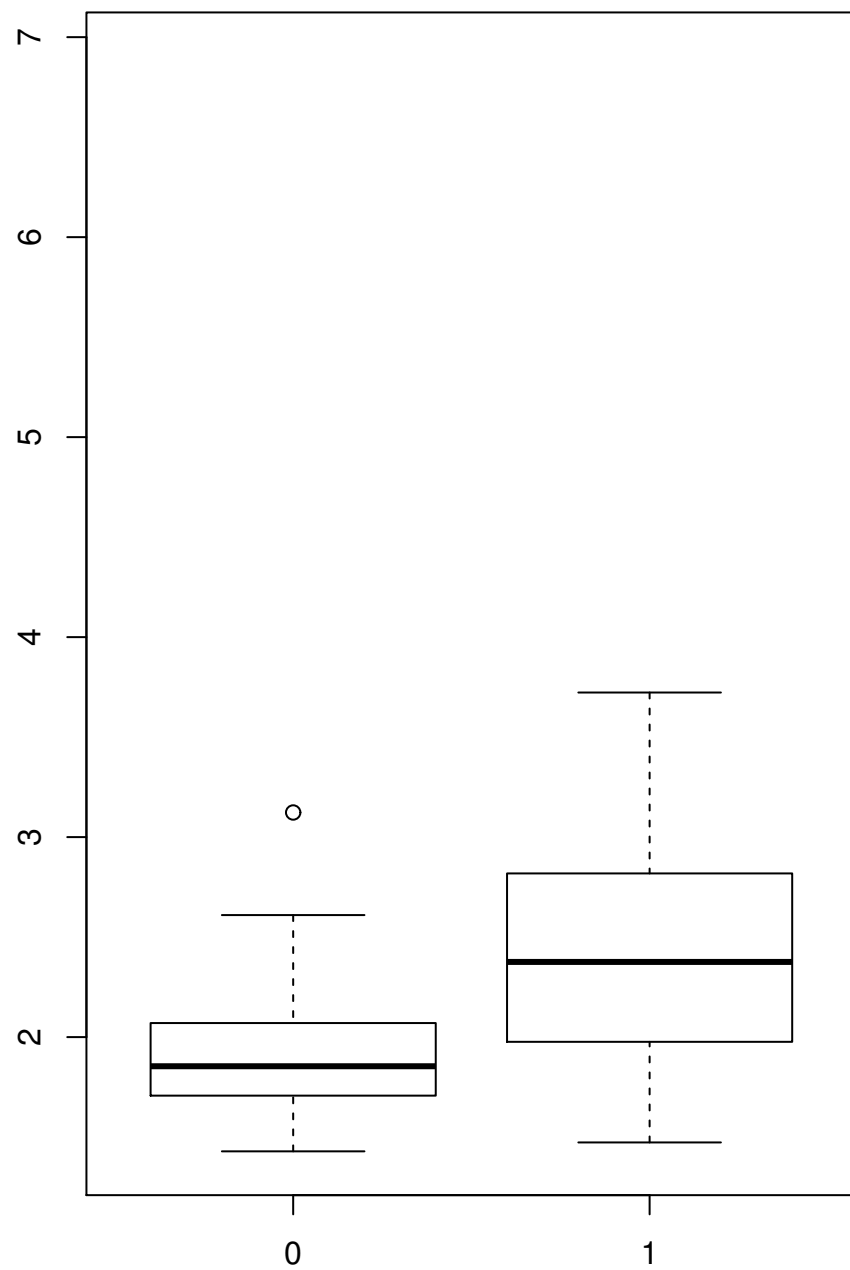

**hsa-miR-488  
(GSE67139)**

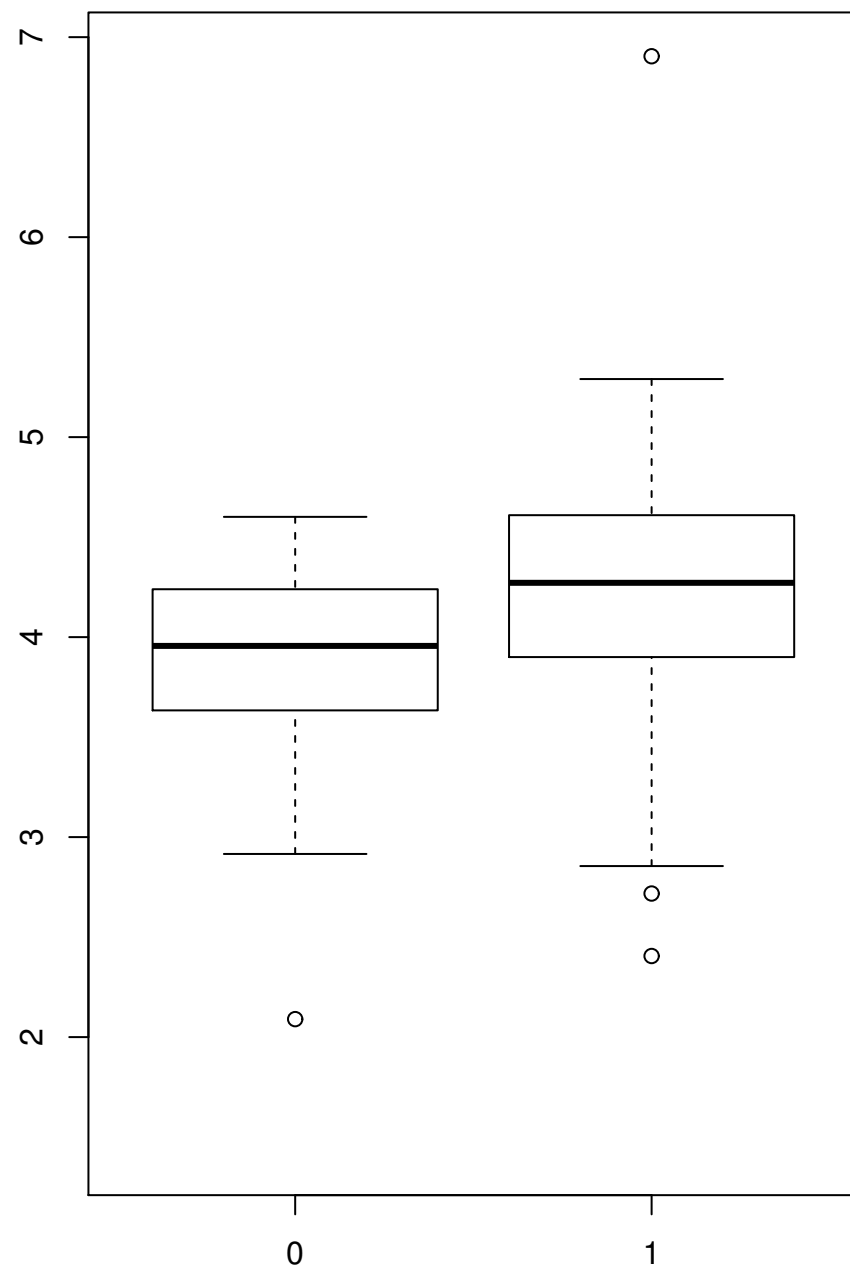

**hsa-miR-489  
(GSE67138)**

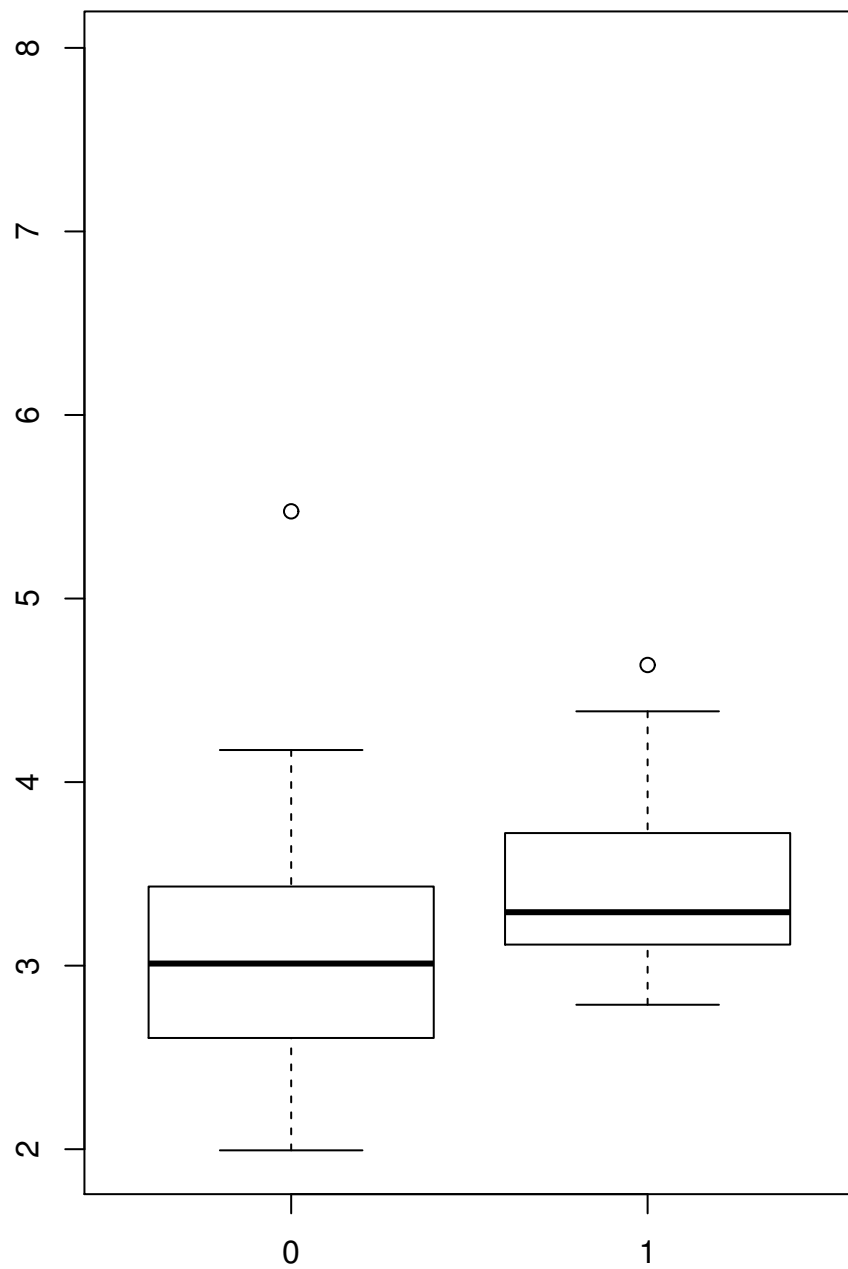

**hsa-miR-489  
(GSE67139)**

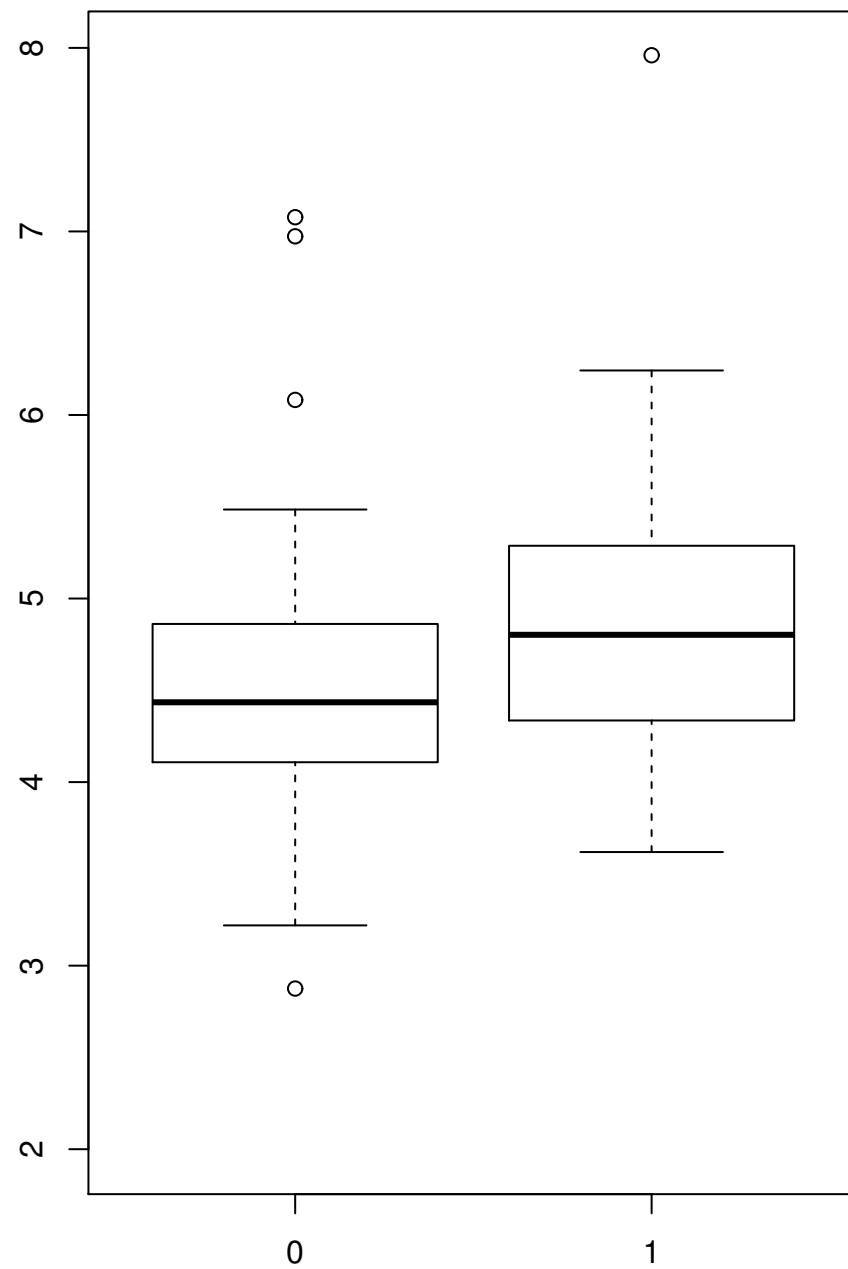

**hsa-miR-493  
(GSE67138)**

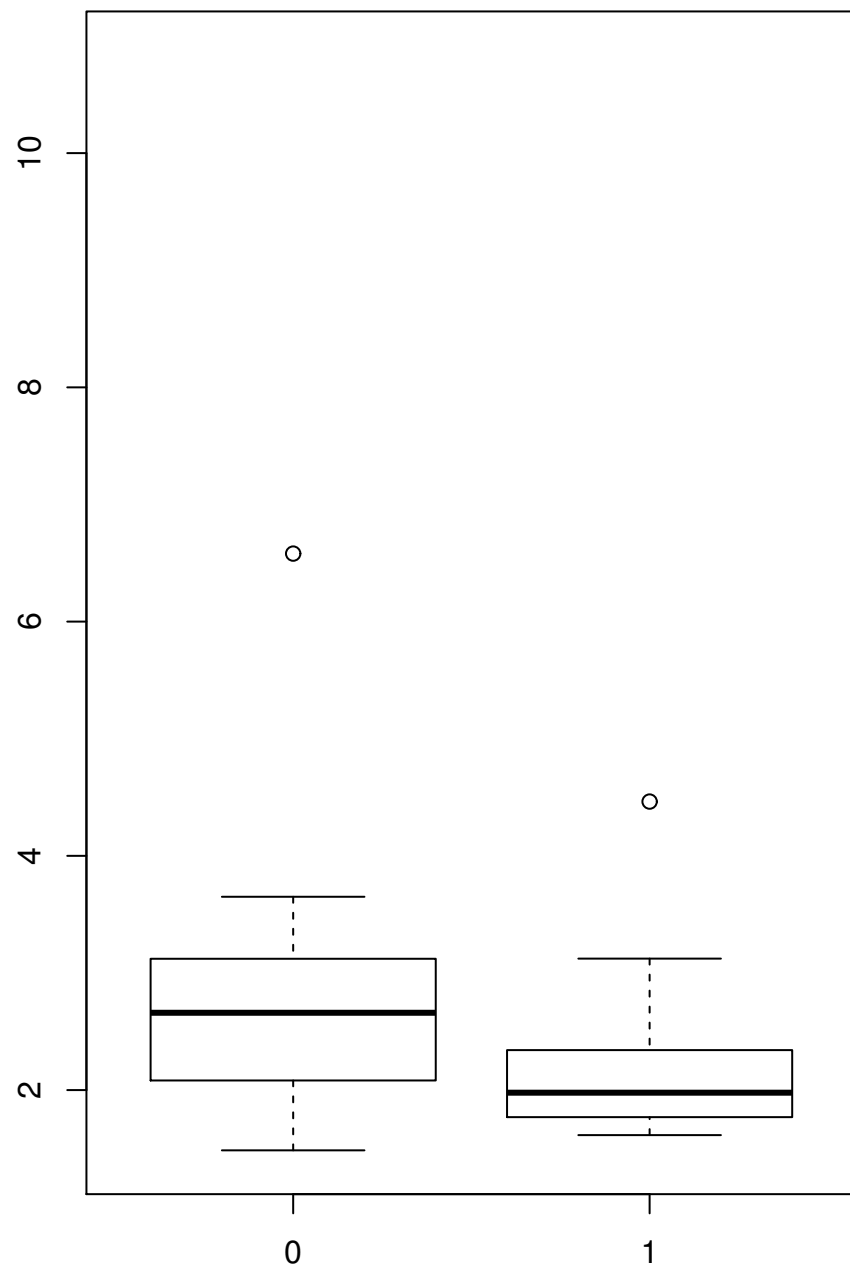

**hsa-miR-493  
(GSE67139)**

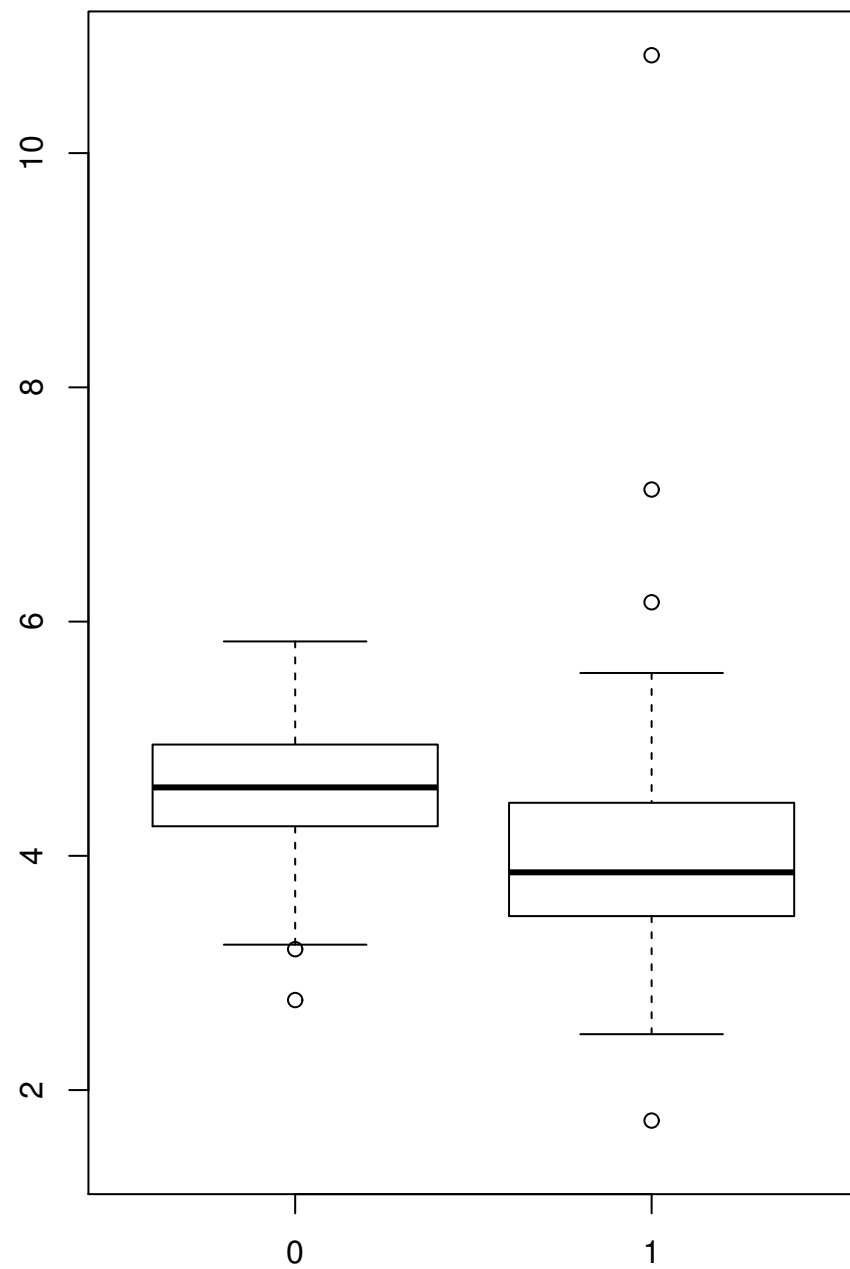

**hsa-miR-494  
(GSE67138)**

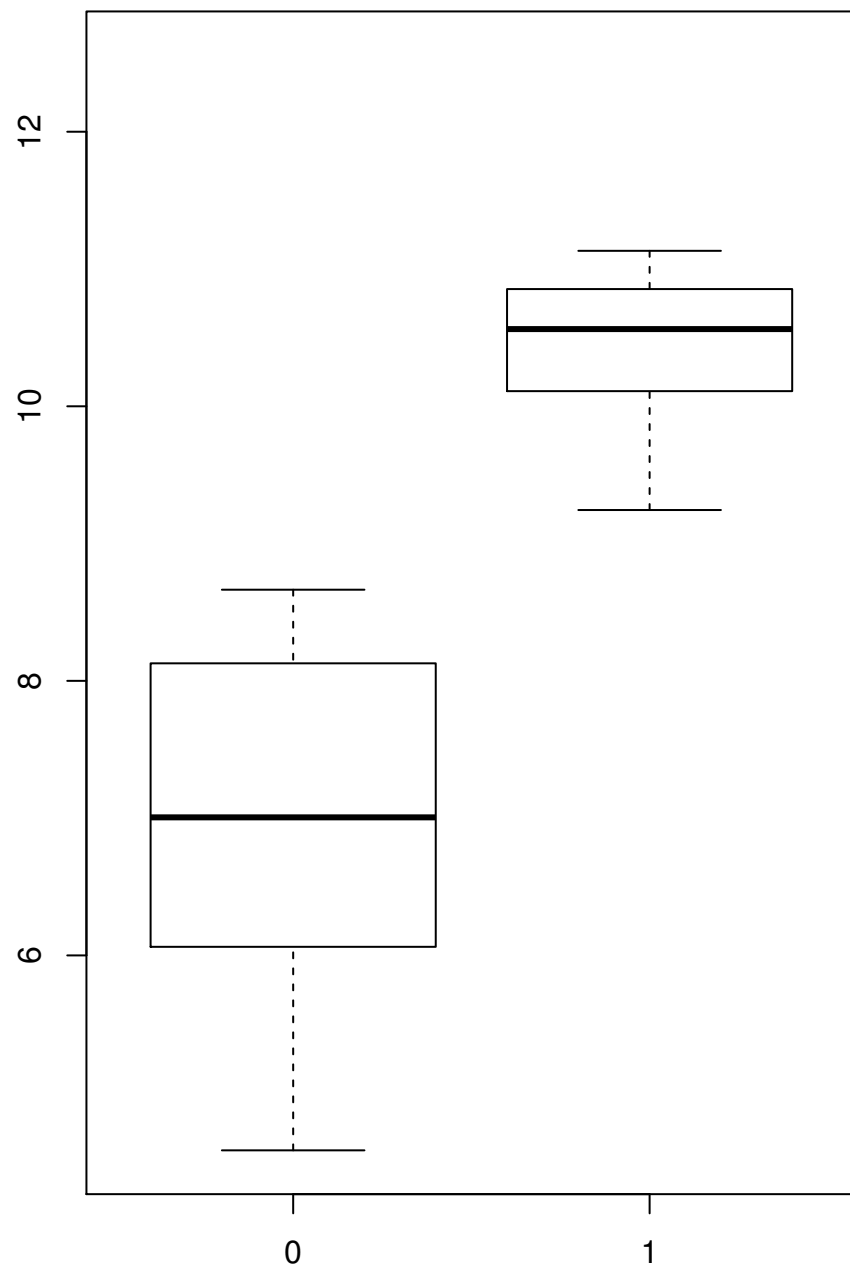

**hsa-miR-494  
(GSE67139)**

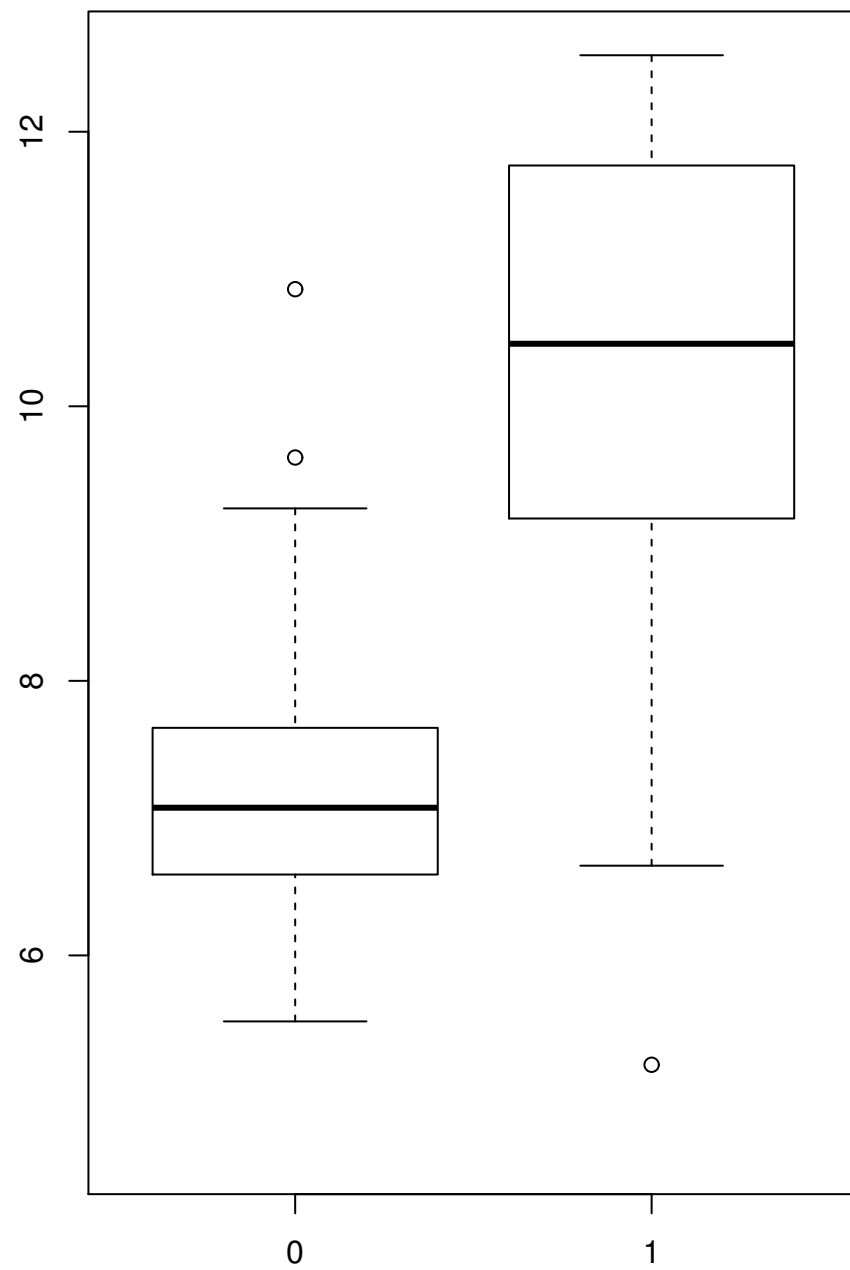

**hsa-miR-497**  
**(GSE67138)**

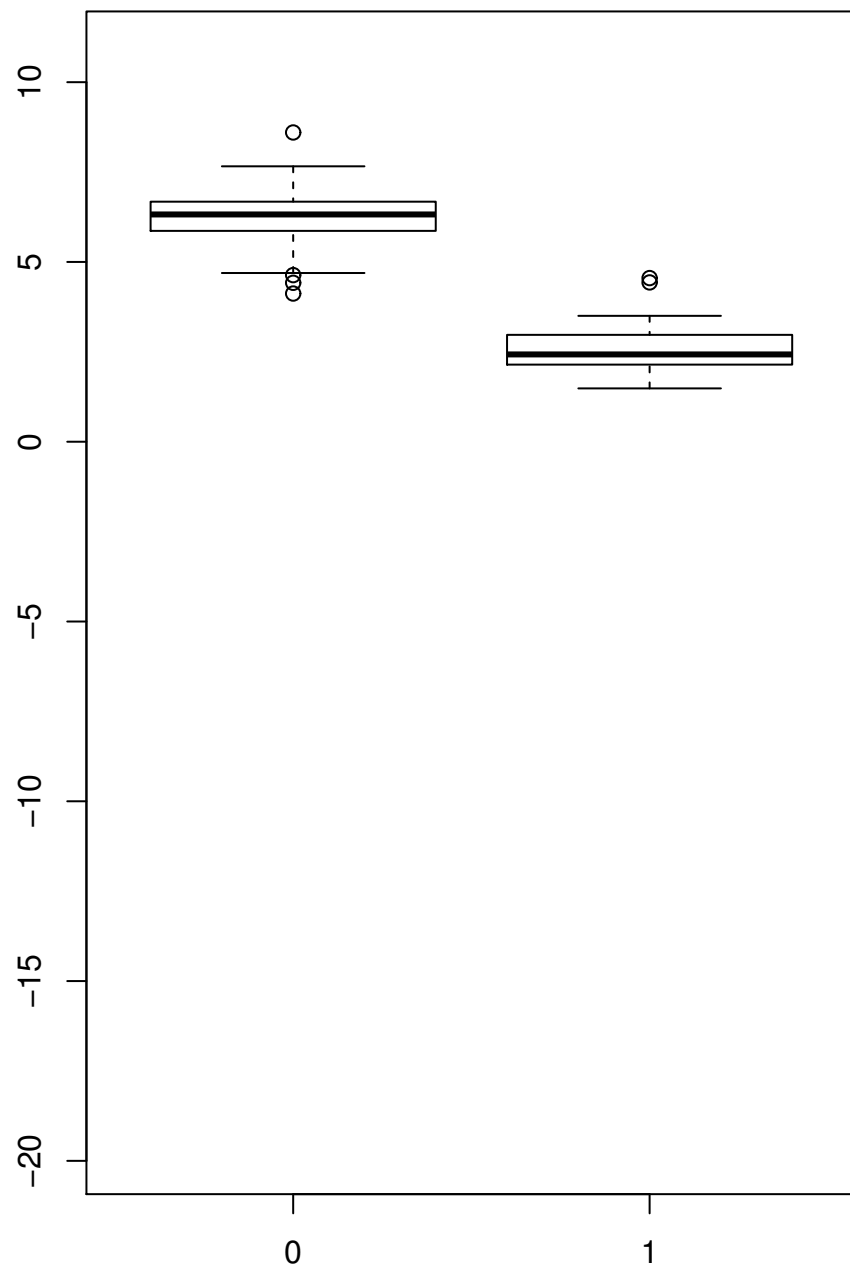

**hsa-miR-497**  
**(GSE67139)**

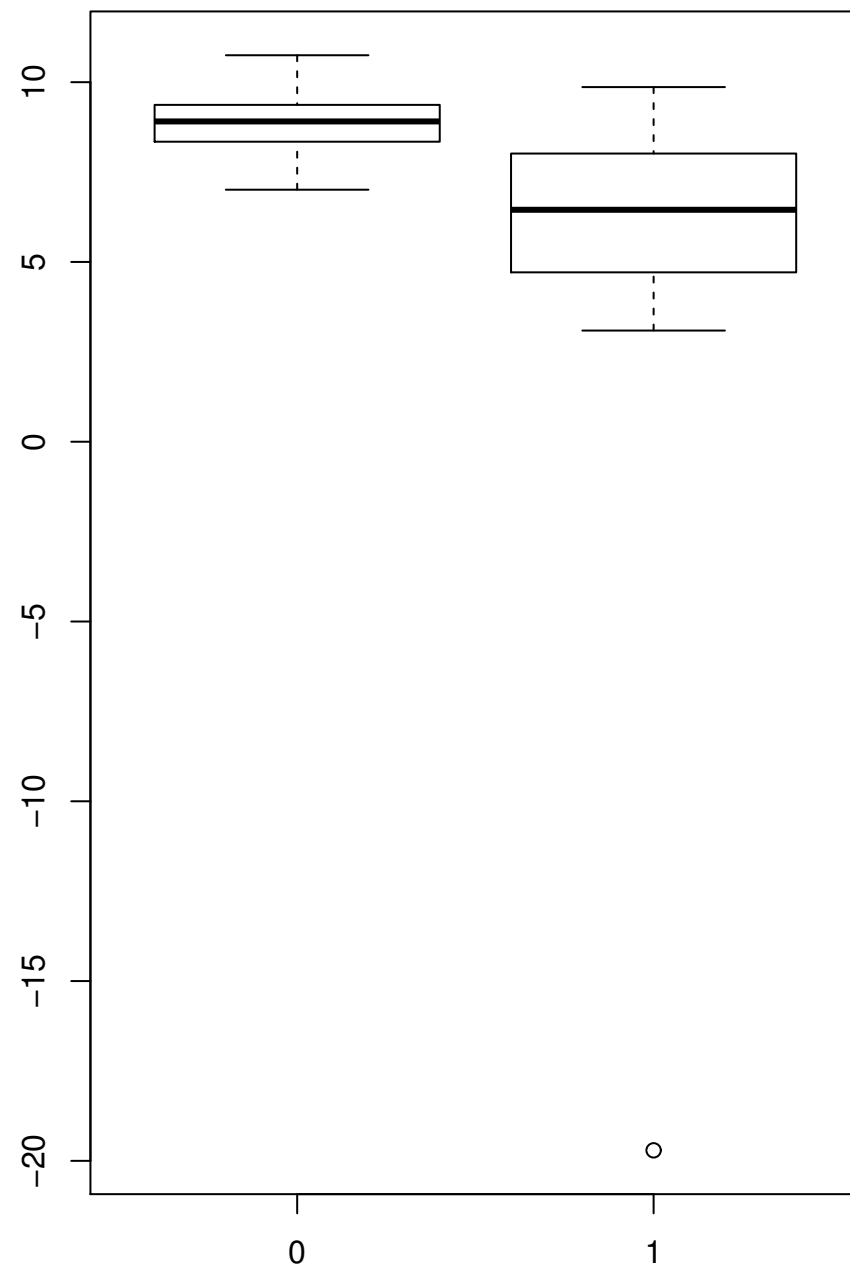

**hsa-miR-500  
(GSE67138)**

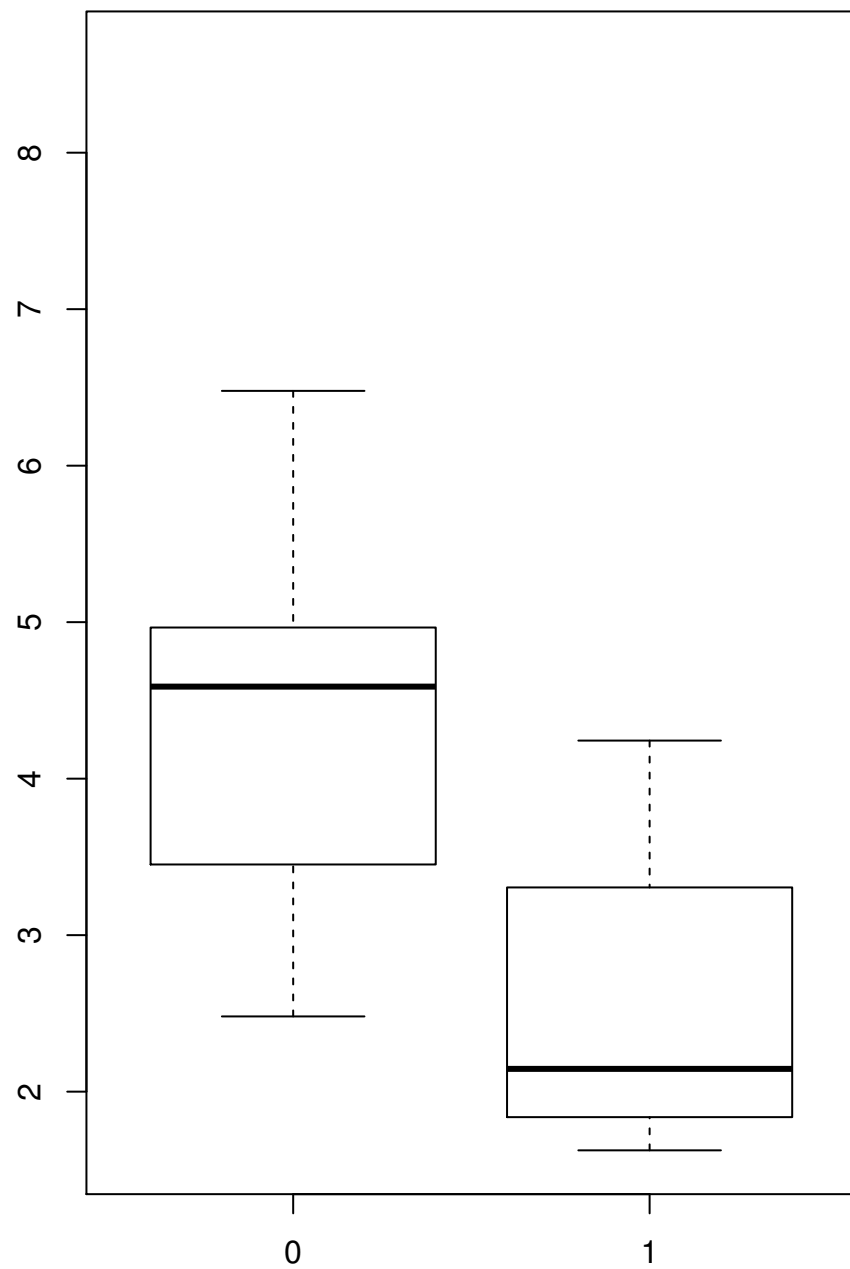

**hsa-miR-500  
(GSE67139)**

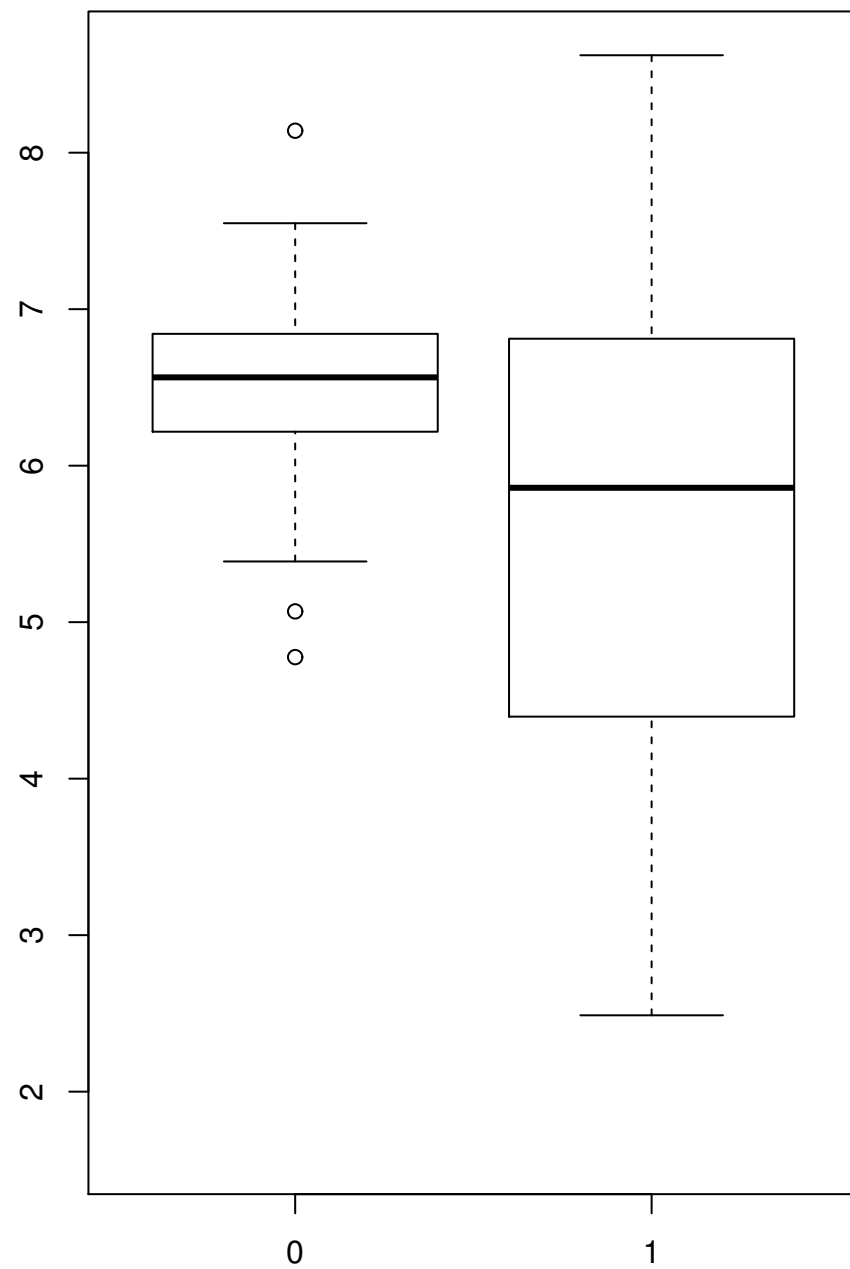



**hsa-miR-501-3p  
(GSE67138)**

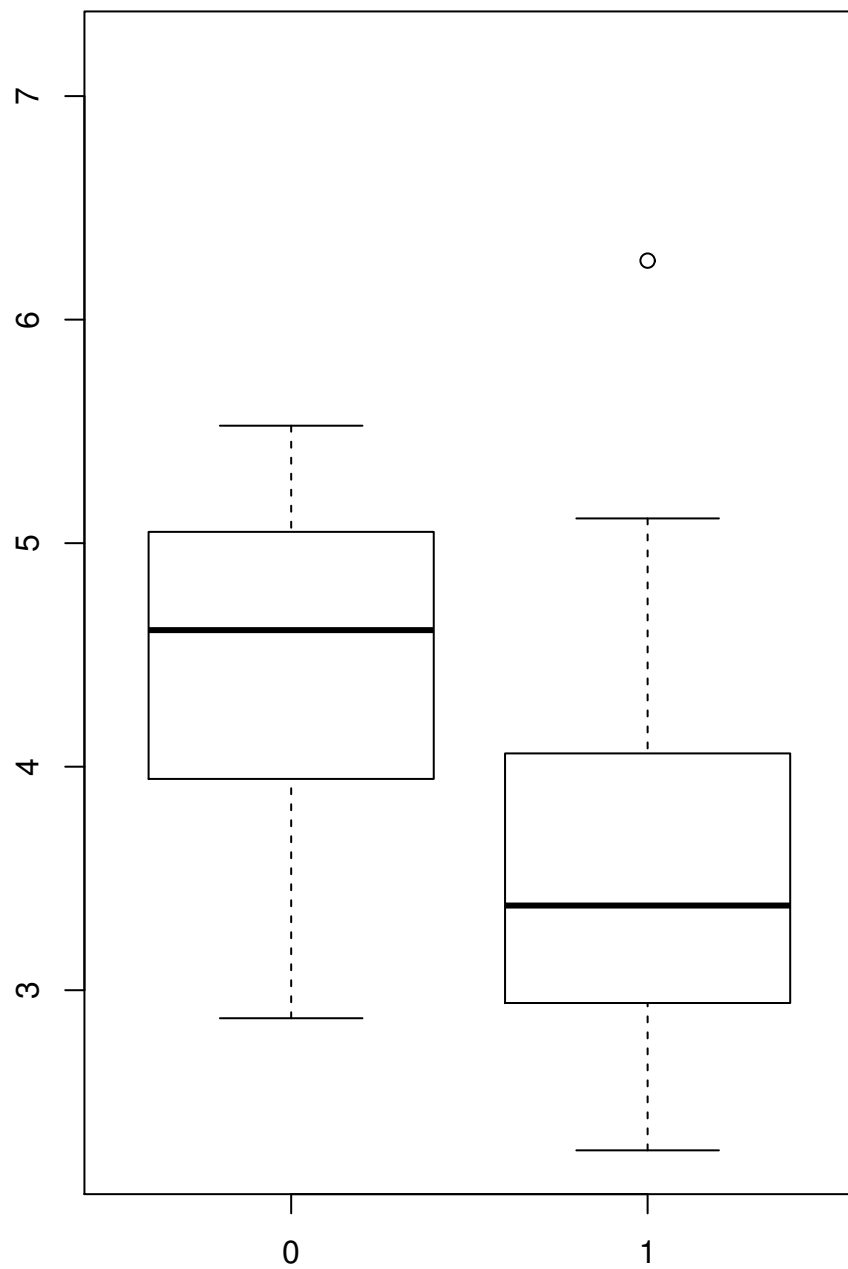

**hsa-miR-501-3p  
(GSE67139)**

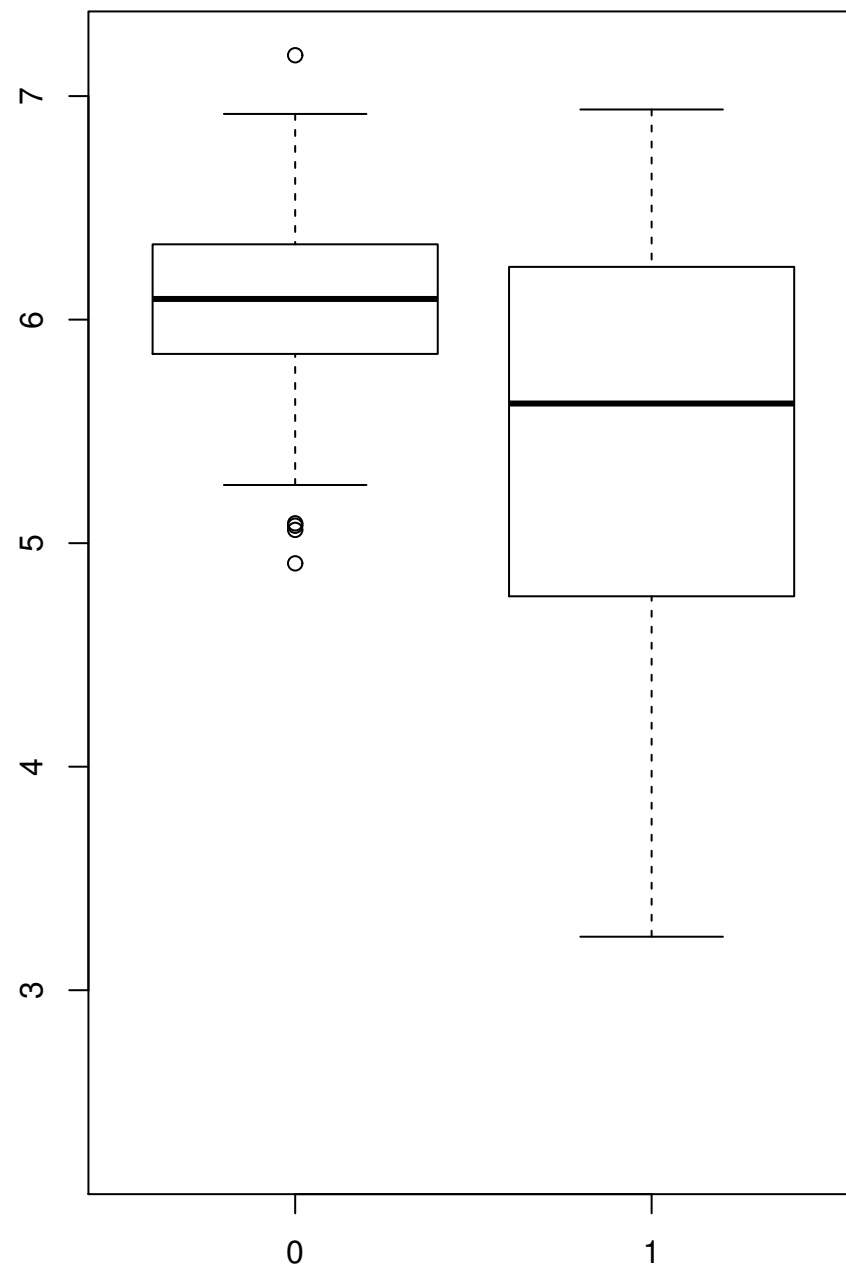

**hsa-miR-503  
(GSE67138)**

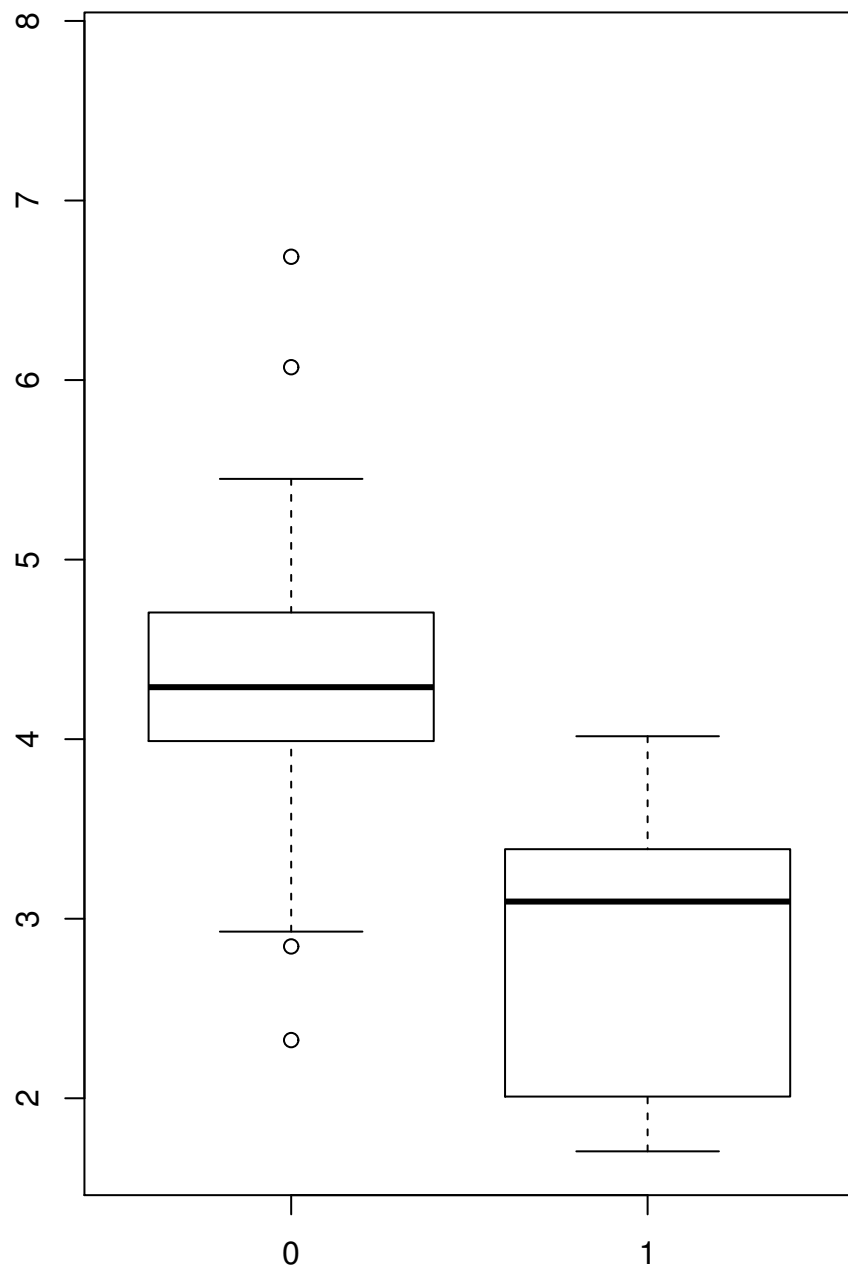

**hsa-miR-503  
(GSE67139)**

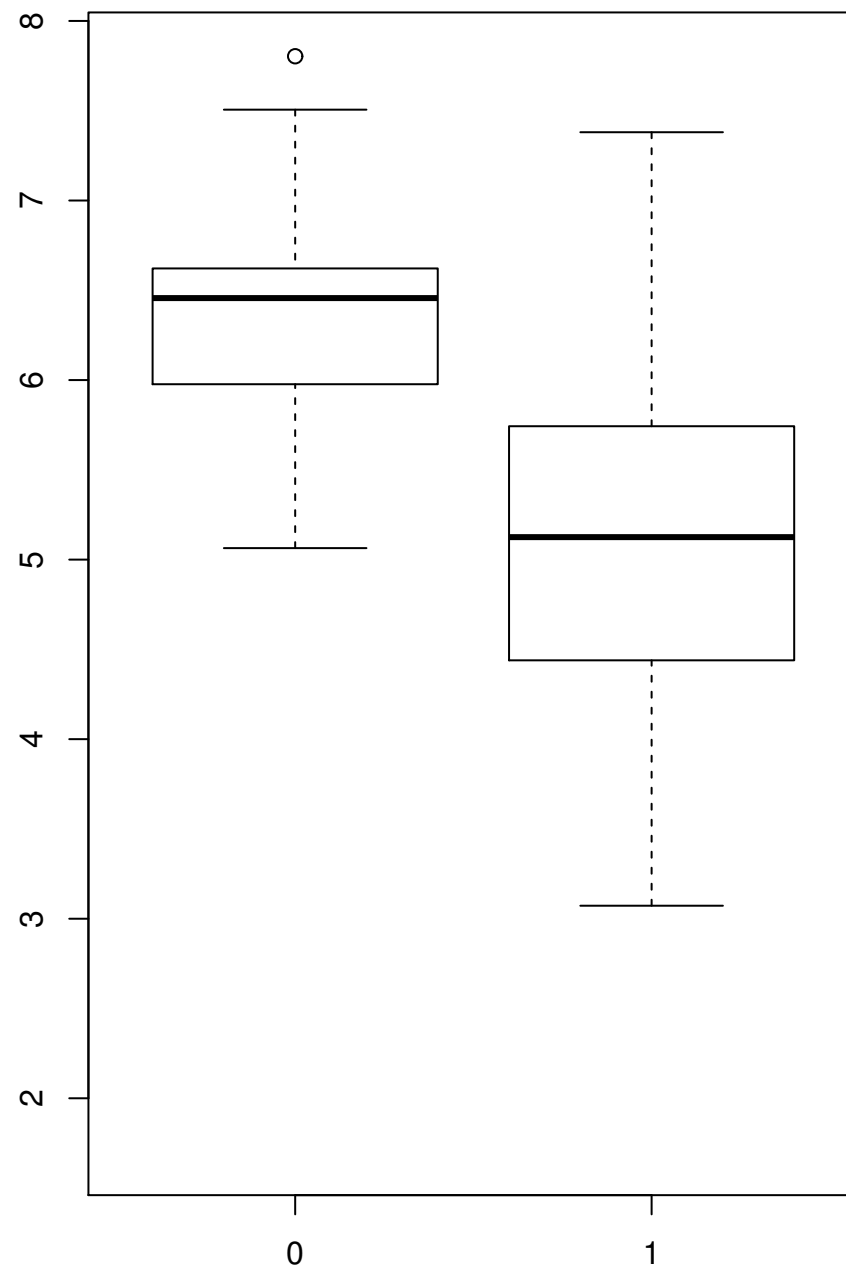

**hsa-miR-505-star  
(GSE67138)**

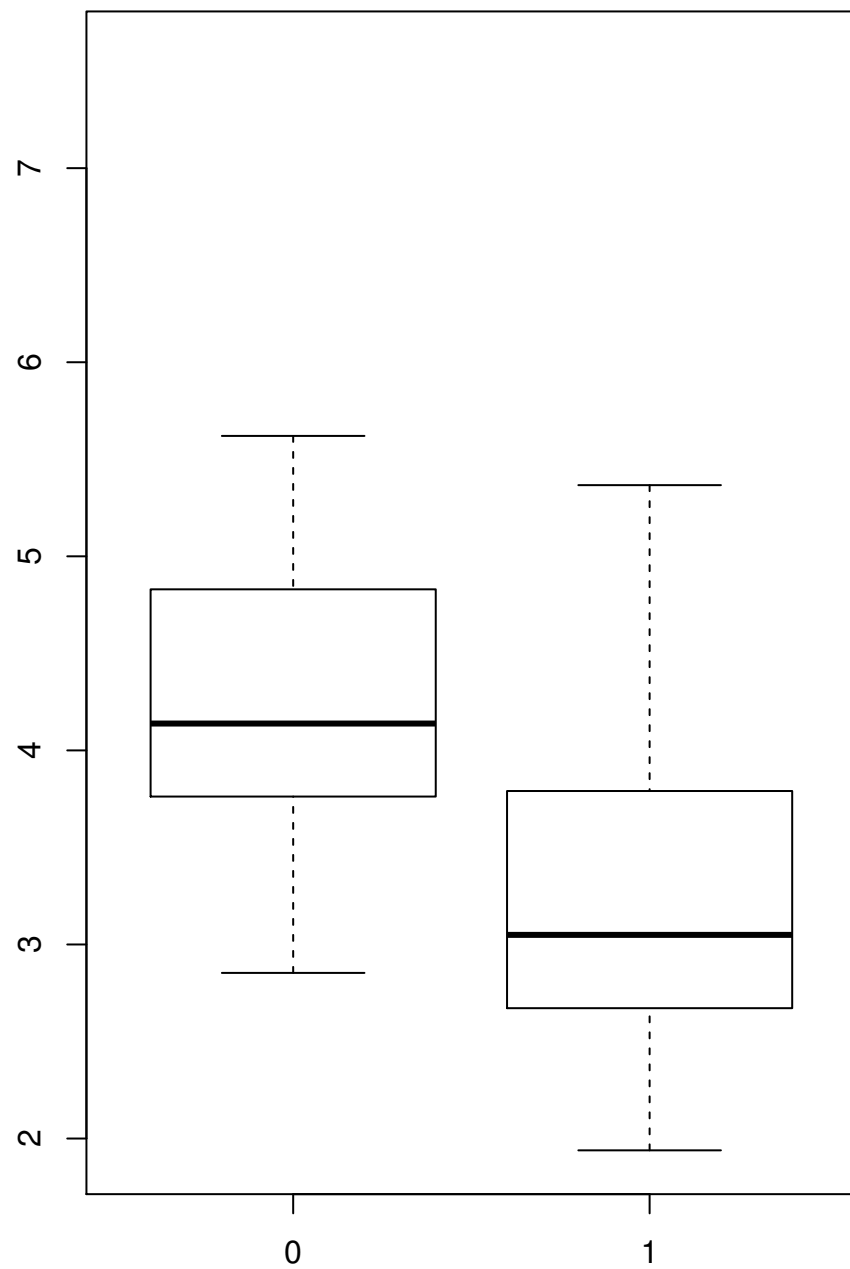

**hsa-miR-505-star  
(GSE67139)**

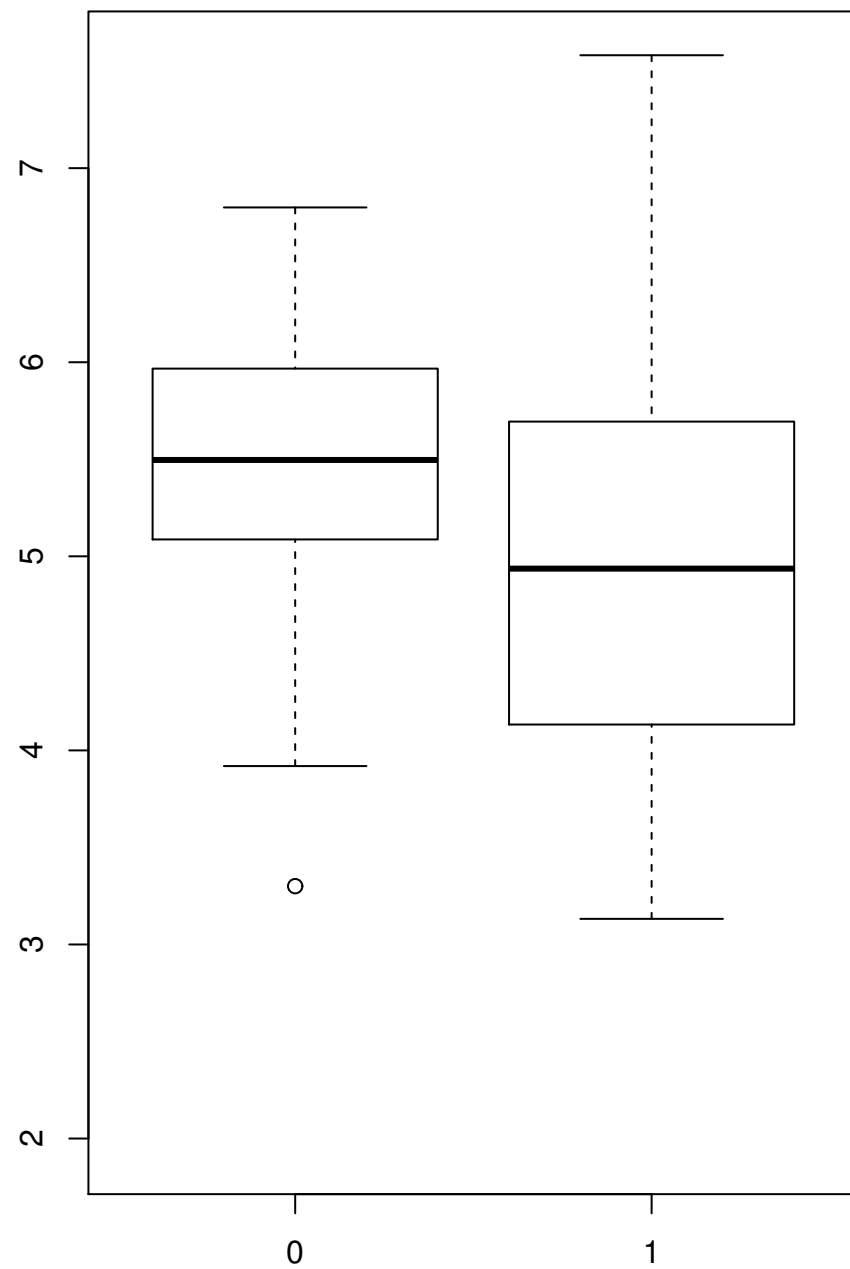

**hsa-miR-505  
(GSE67138)**

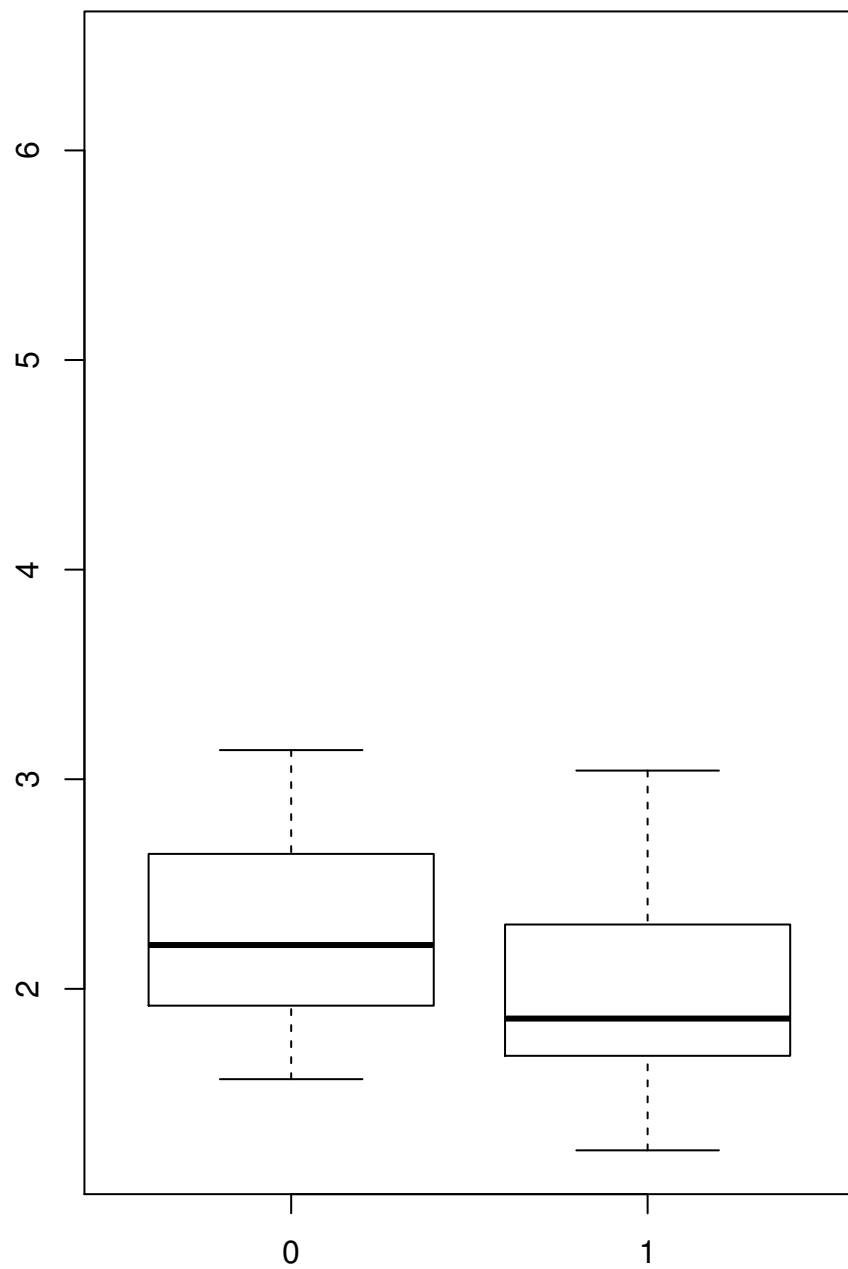

**hsa-miR-505  
(GSE67139)**

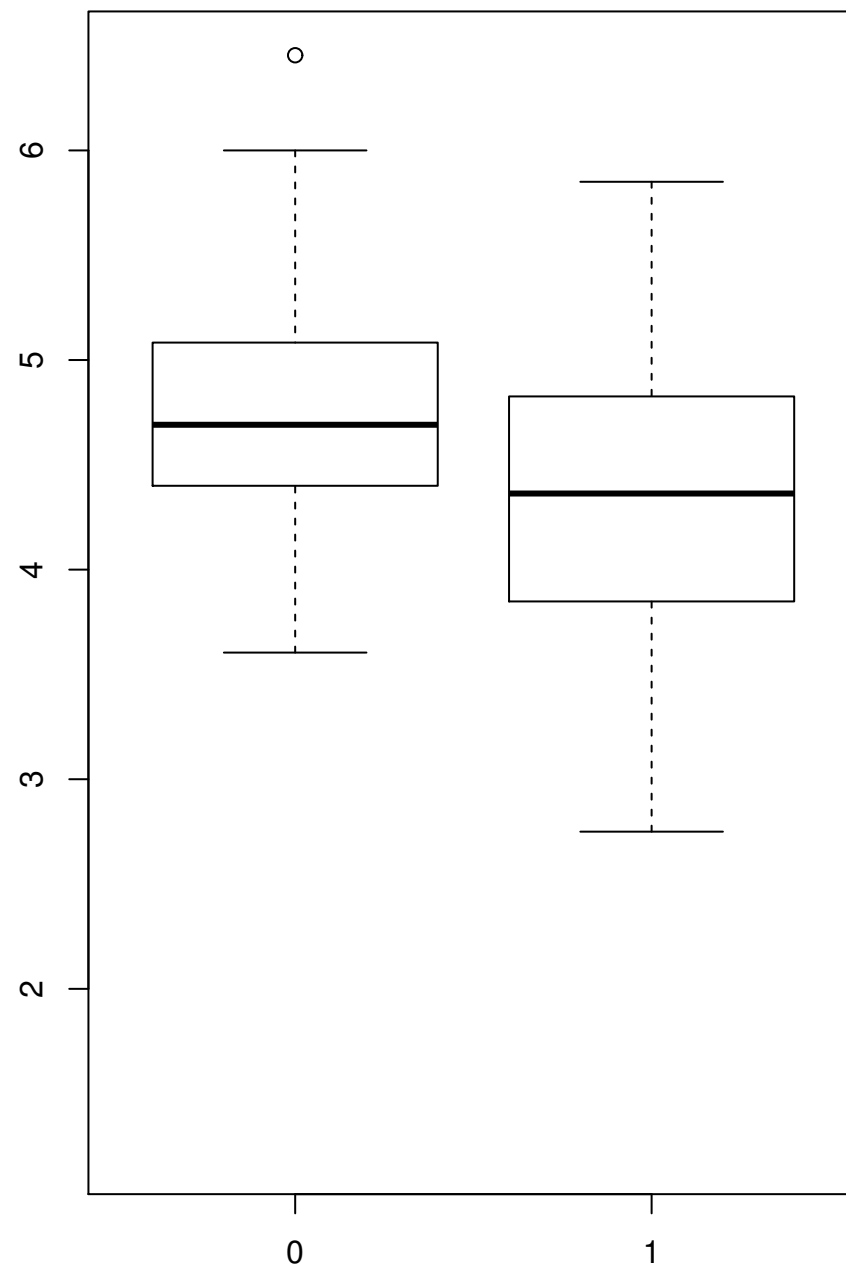

**hsa-miR-508-3p  
(GSE67138)**

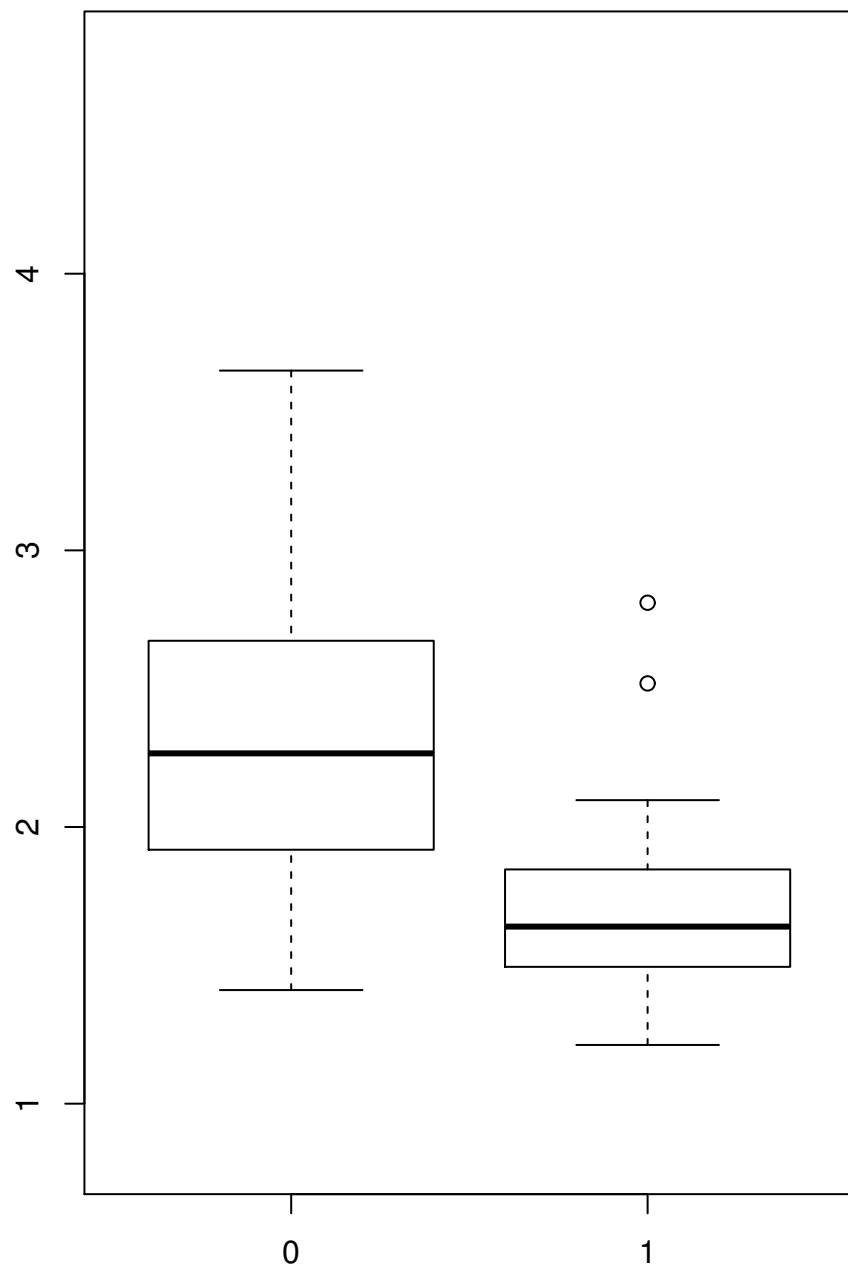

**hsa-miR-508-3p  
(GSE67139)**

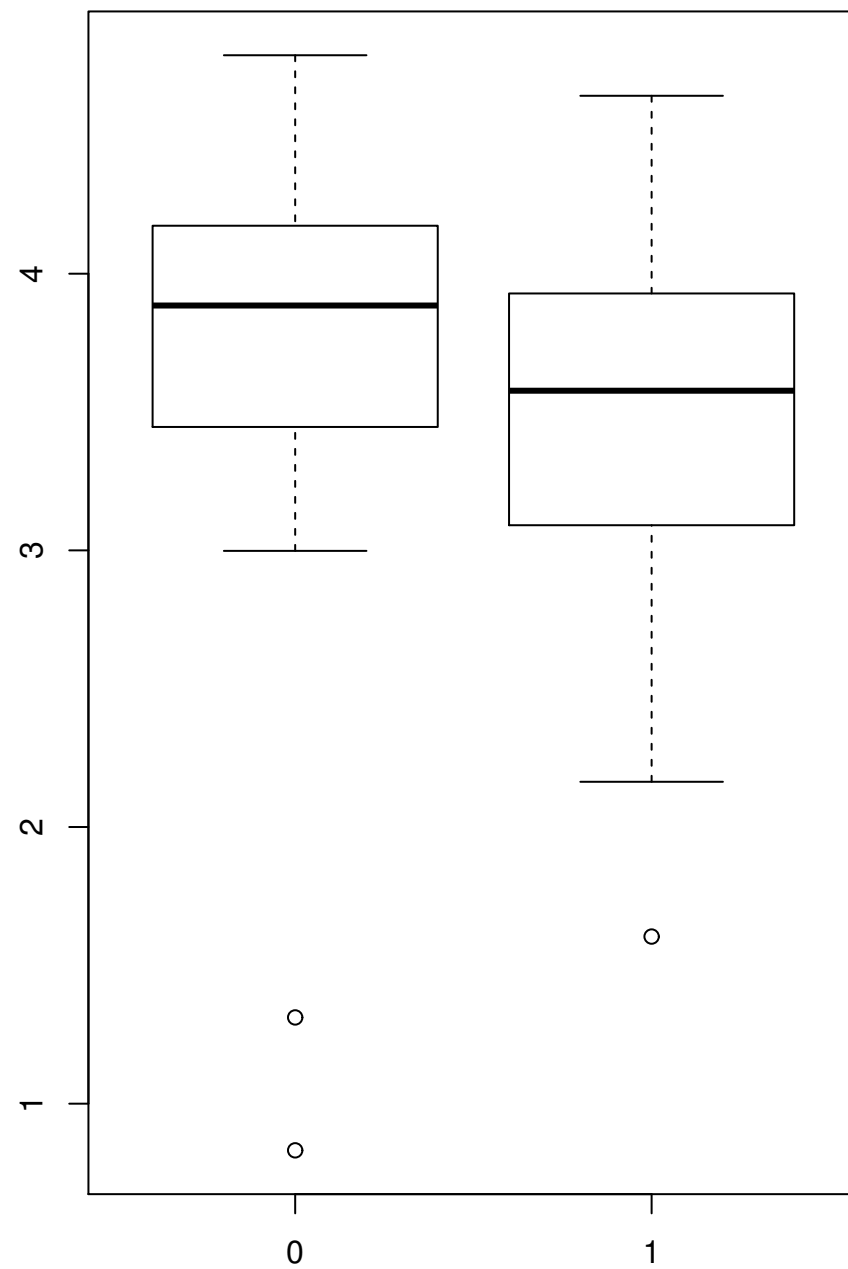

**hsa-miR-508-5p  
(GSE67138)**

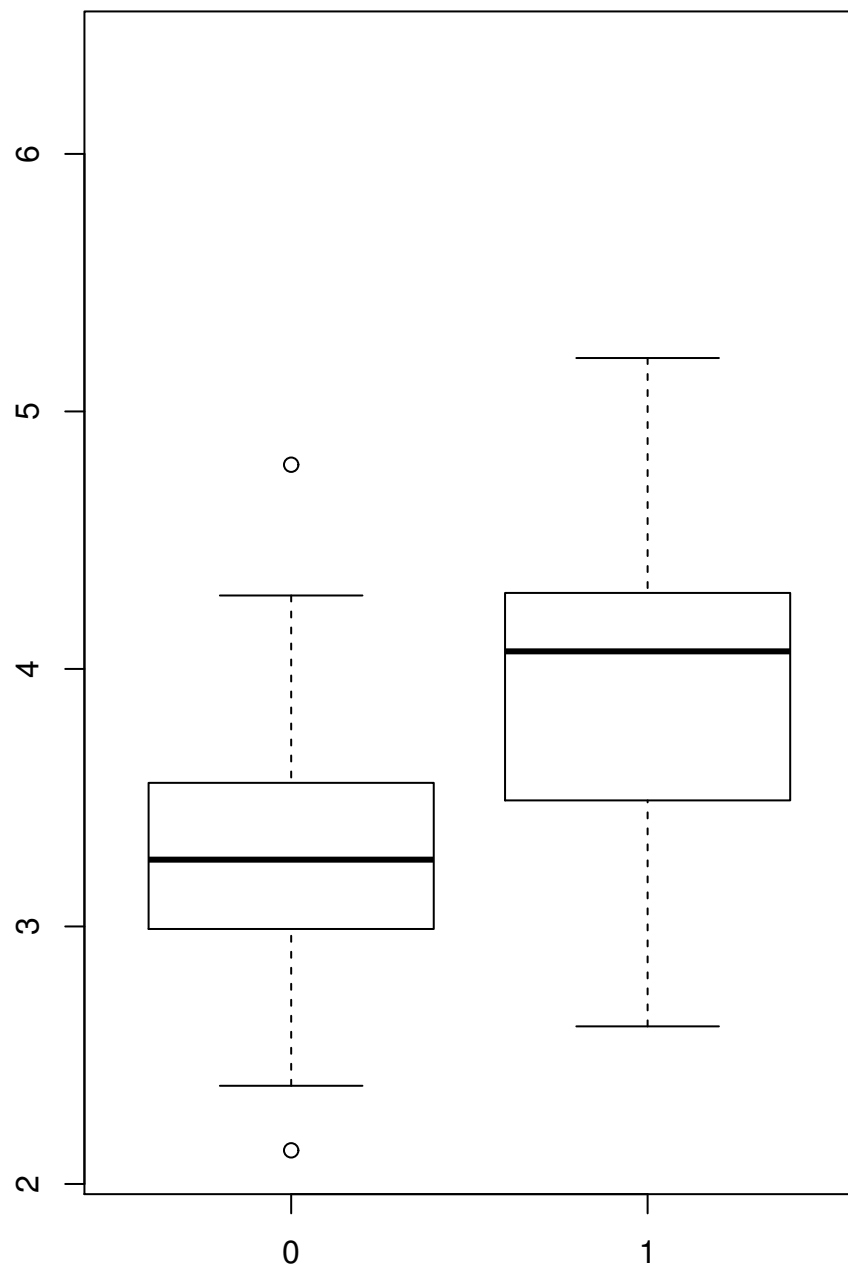

**hsa-miR-508-5p  
(GSE67139)**

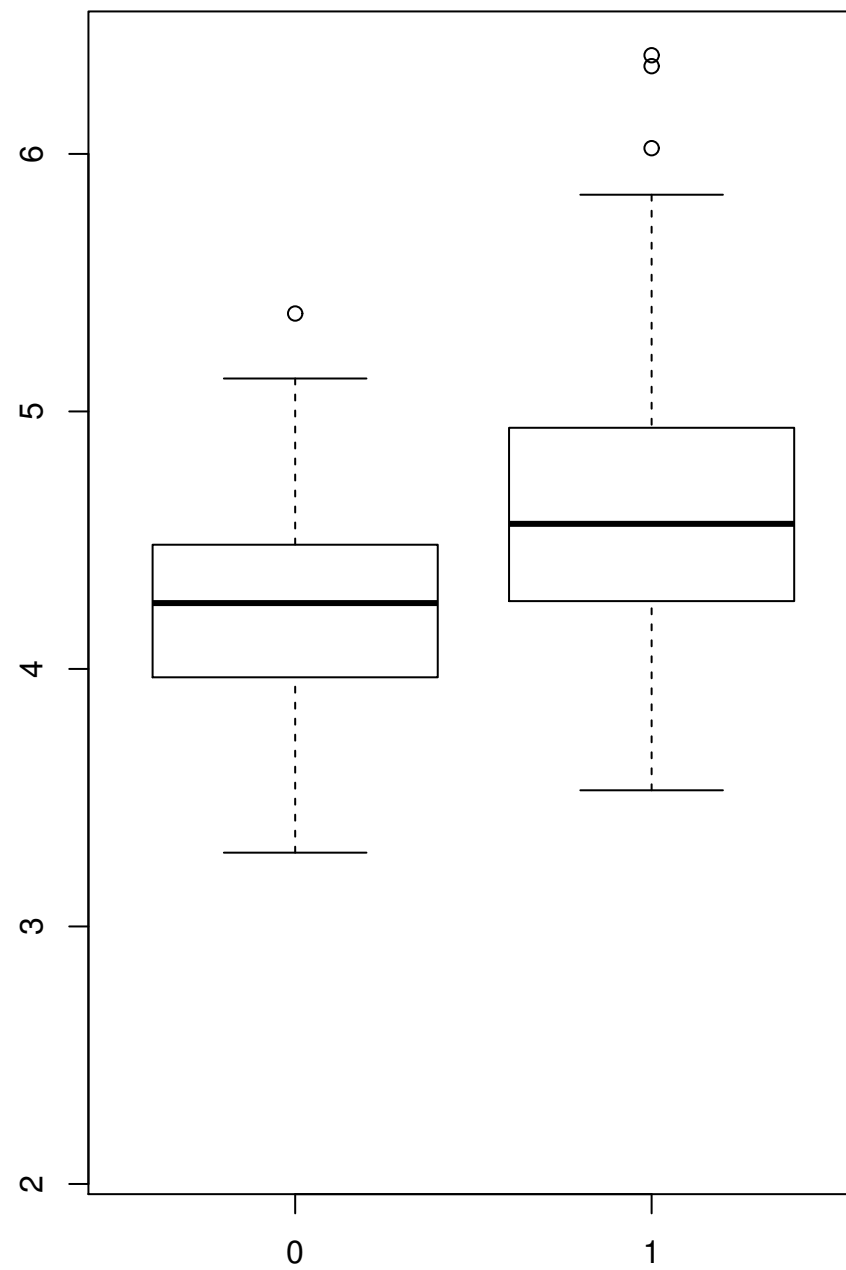

**hsa-miR-509-3-5p  
(GSE67138)**

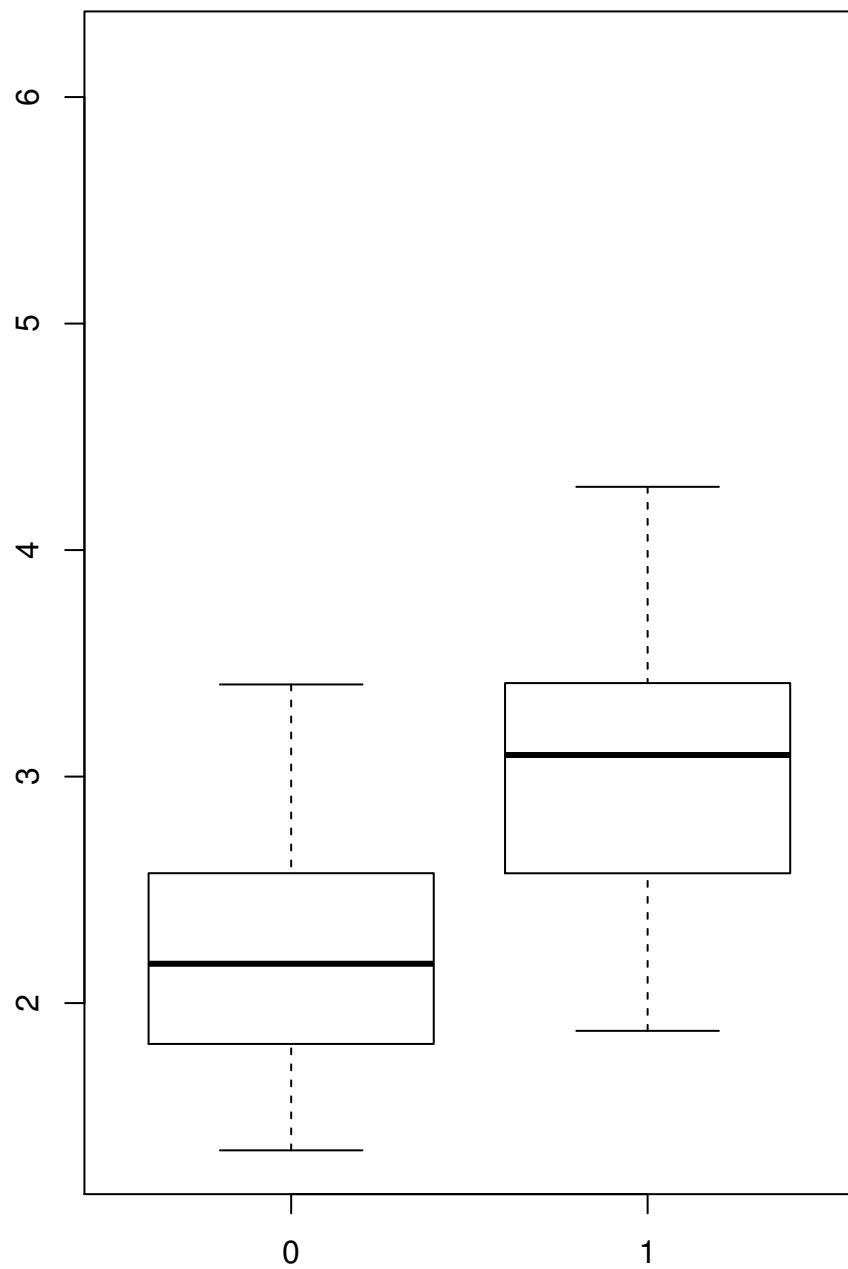

**hsa-miR-509-3-5p  
(GSE67139)**

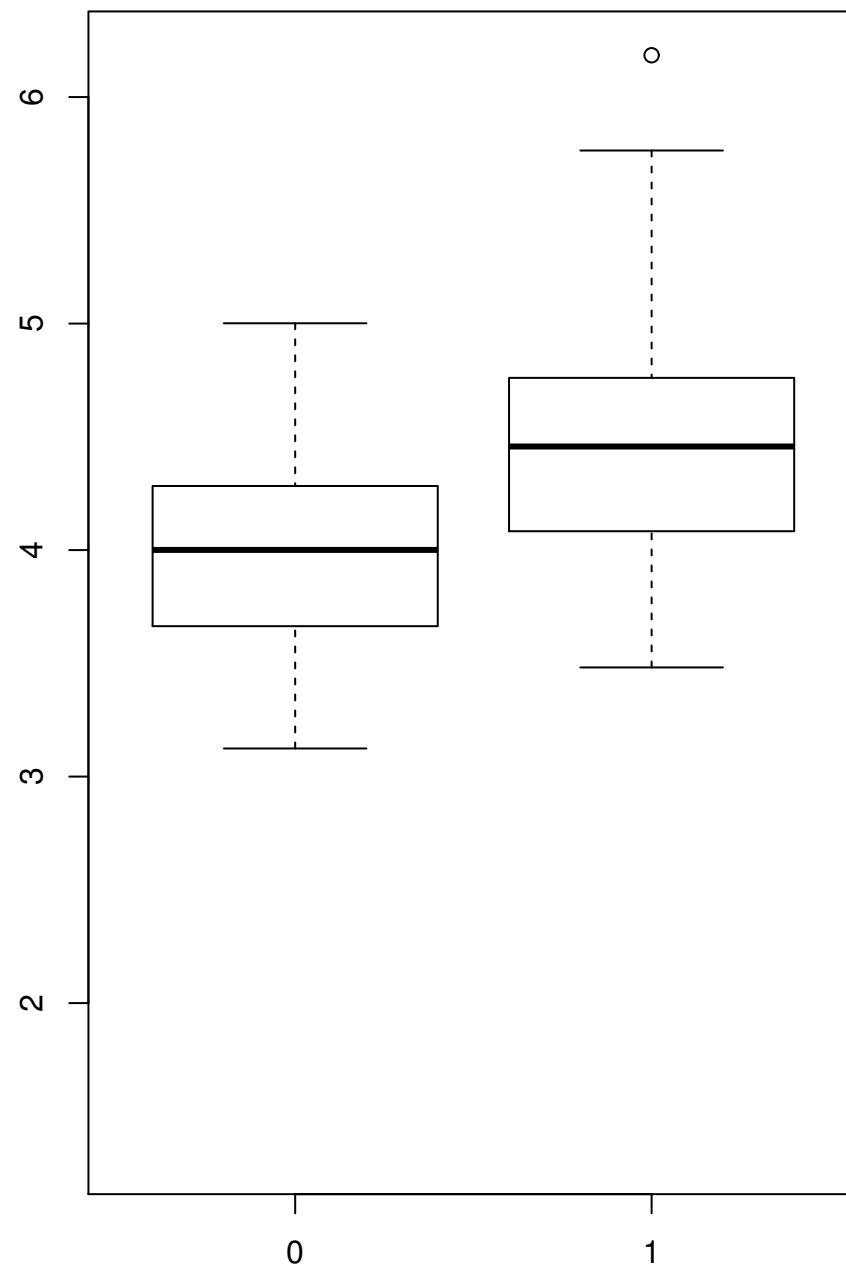

**hsa-miR-513a-5p  
(GSE67138)**

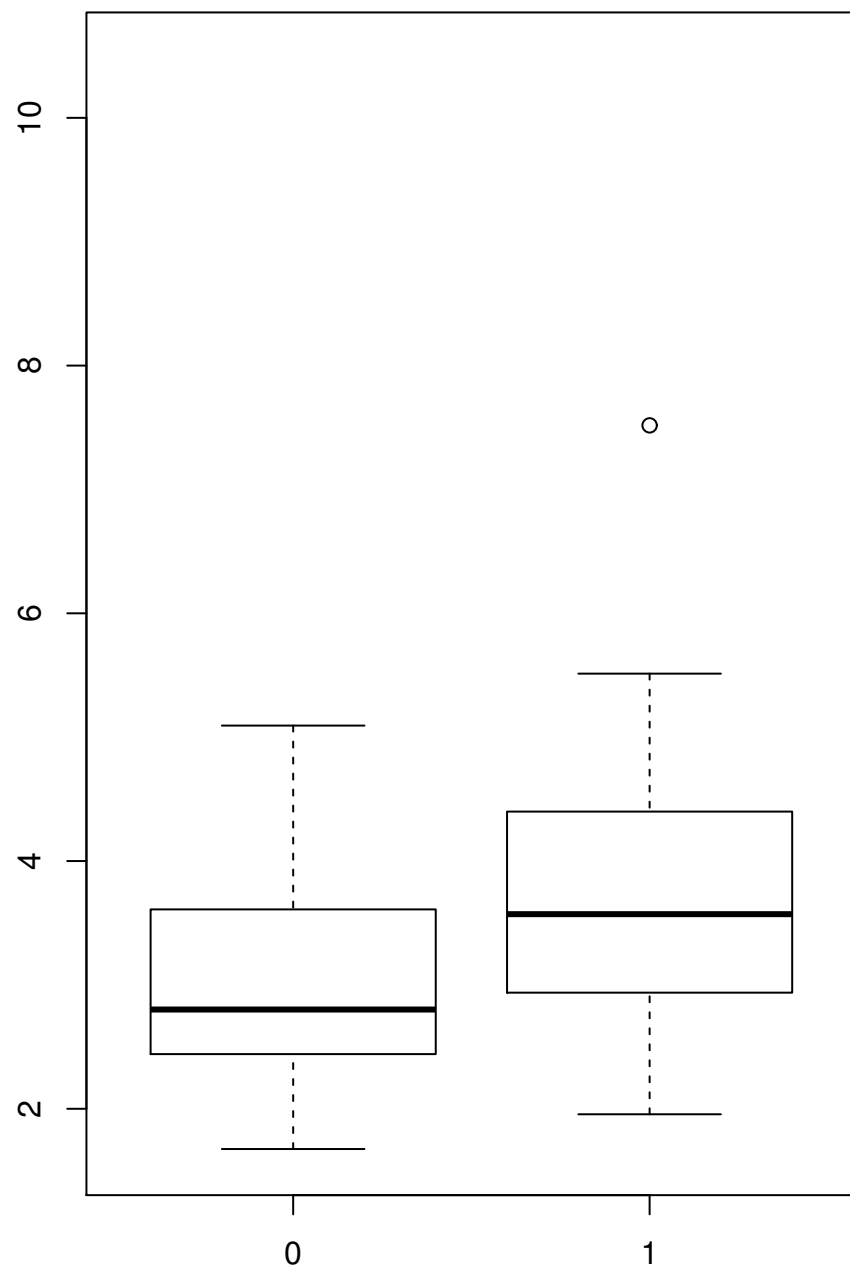

**hsa-miR-513a-5p  
(GSE67139)**

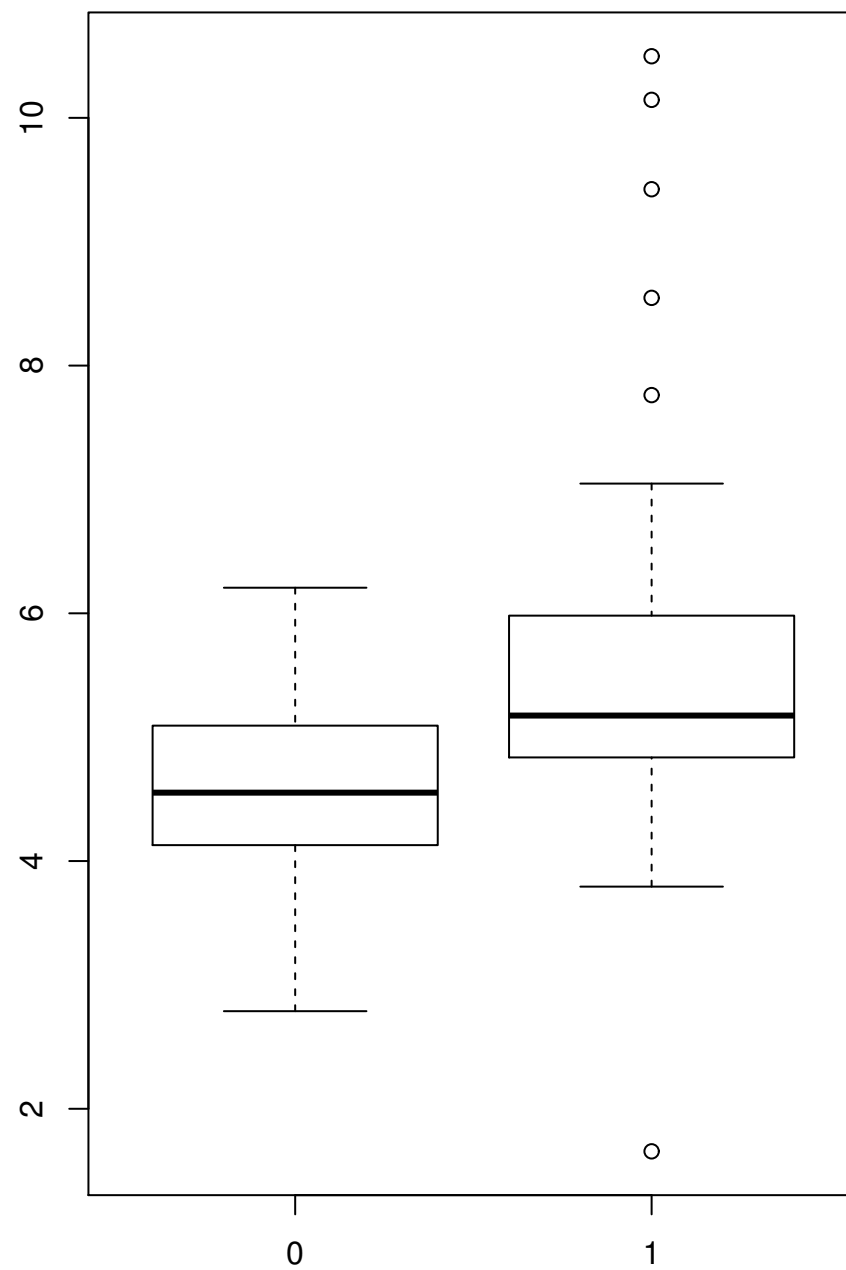



**hsa-miR-518d-5p  
(GSE67138)**

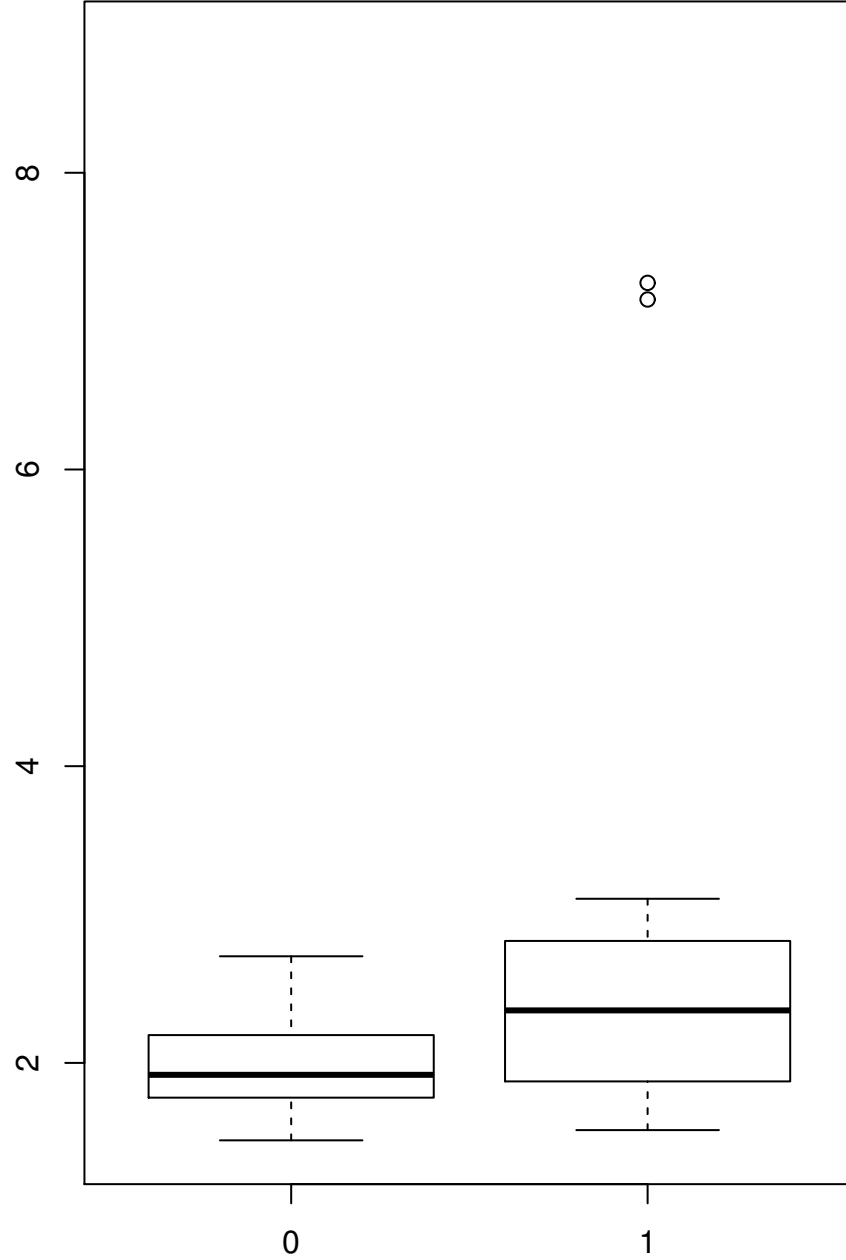

**hsa-miR-518d-5p  
(GSE67139)**

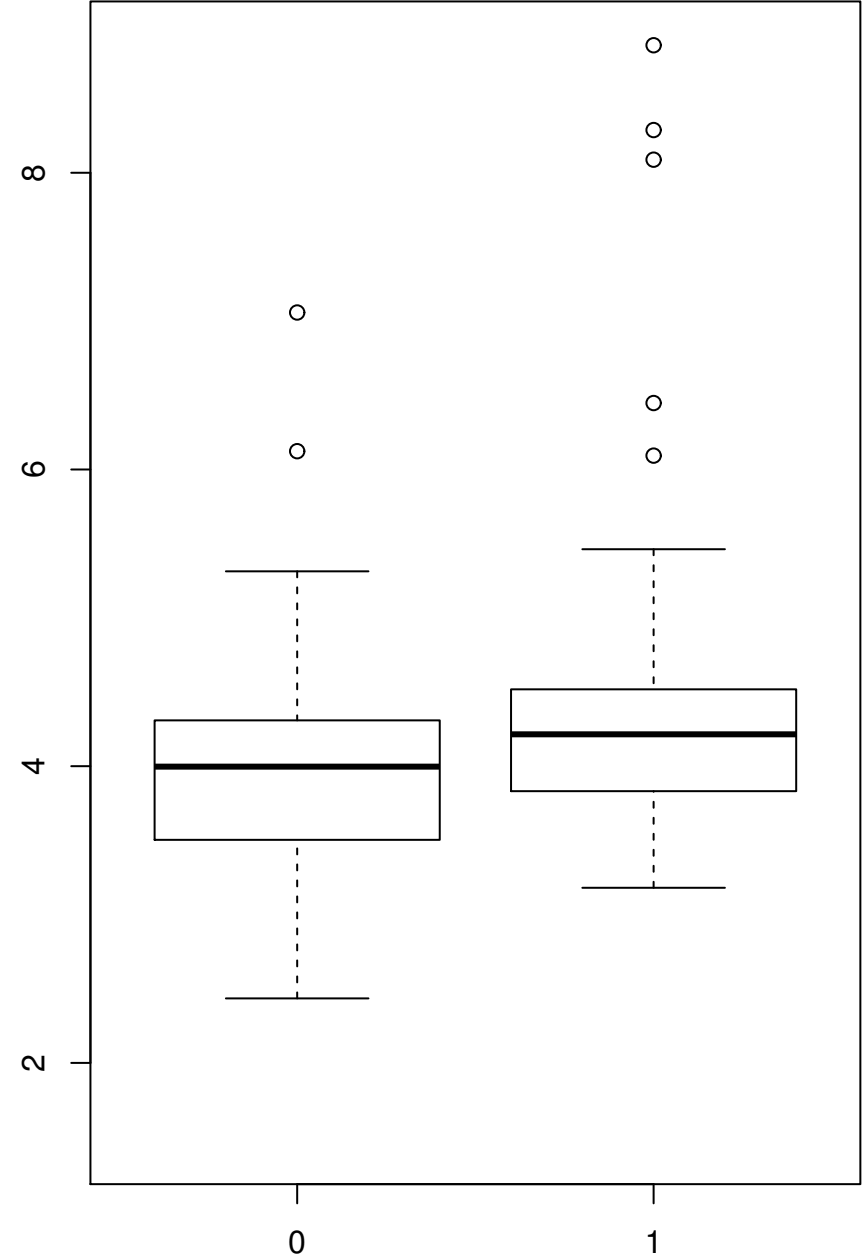

**hsa-miR-519b-3p  
(GSE67138)**

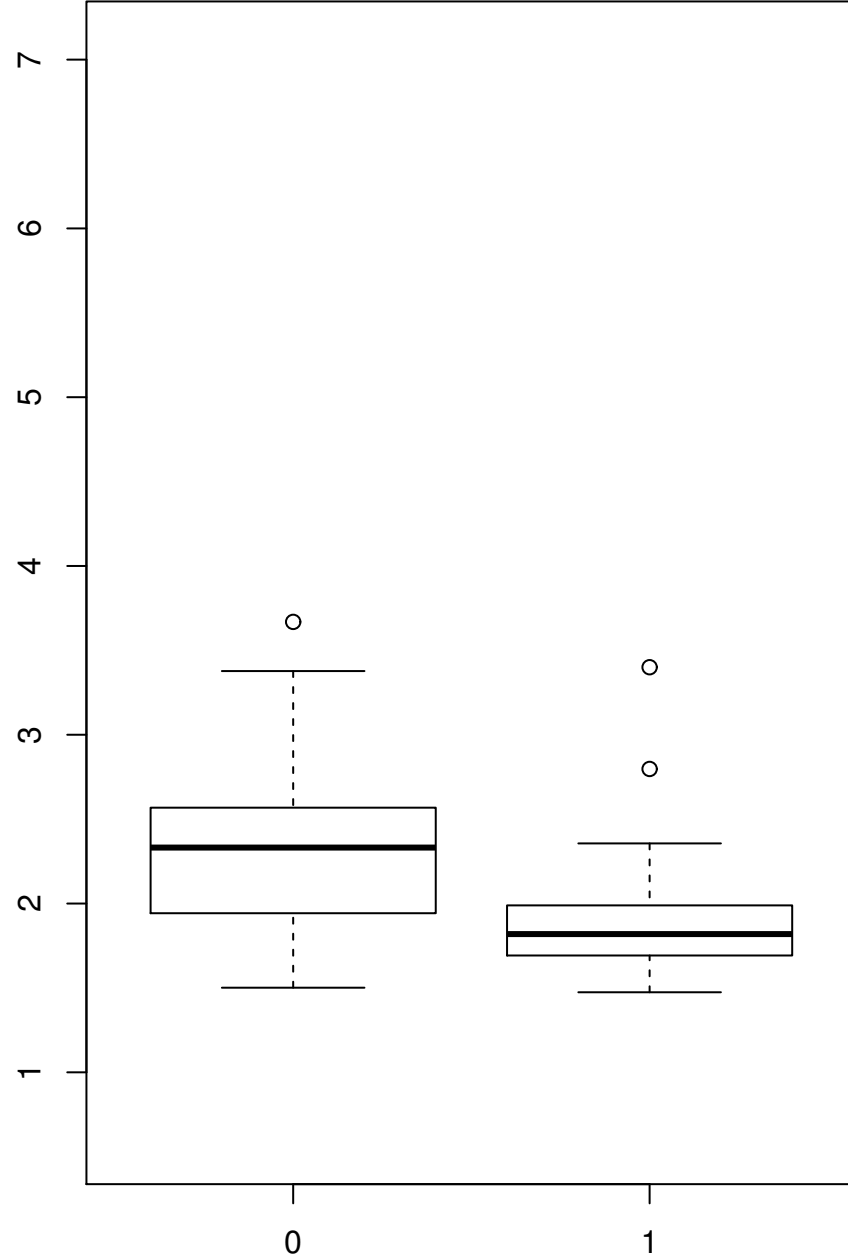

**hsa-miR-519b-3p  
(GSE67139)**

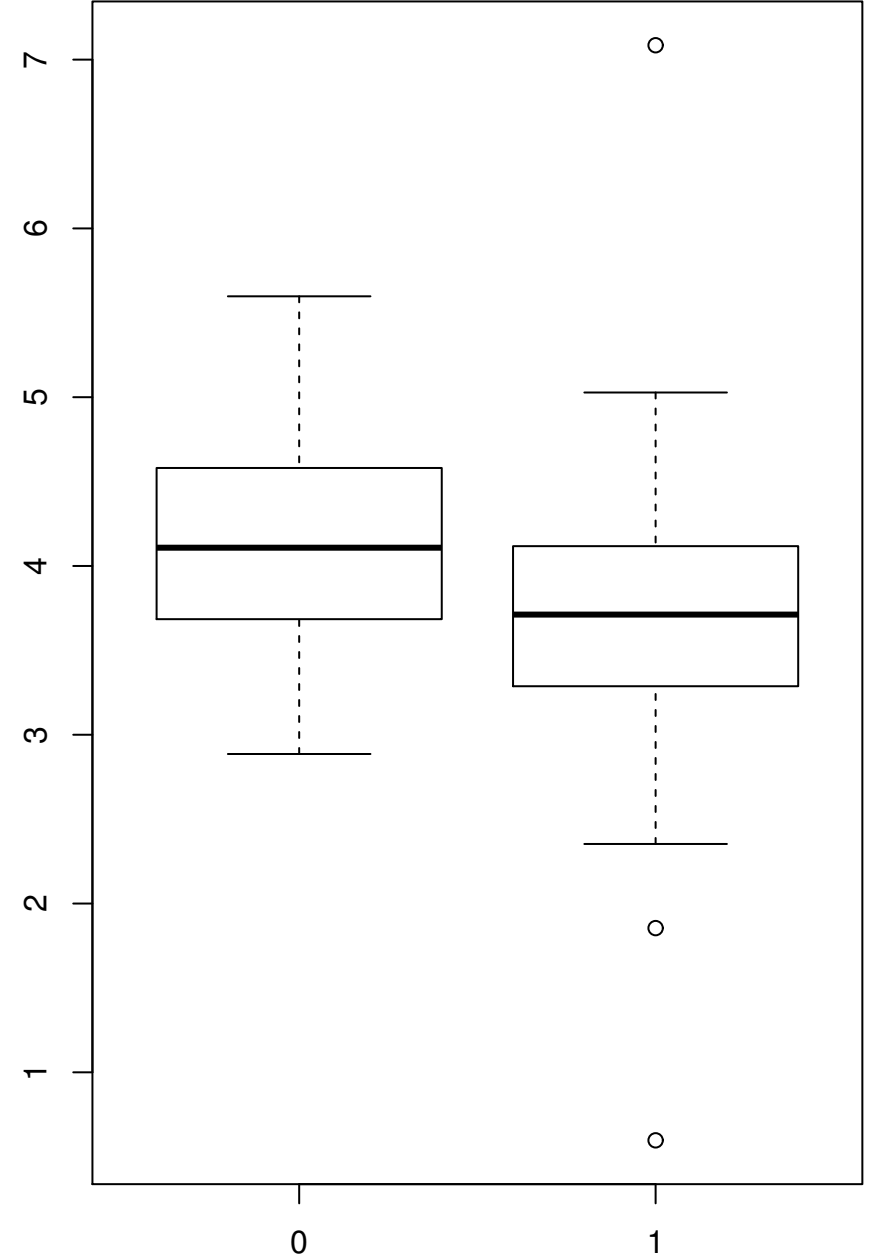

hsa-miR-542-5p  
(GSE67138)

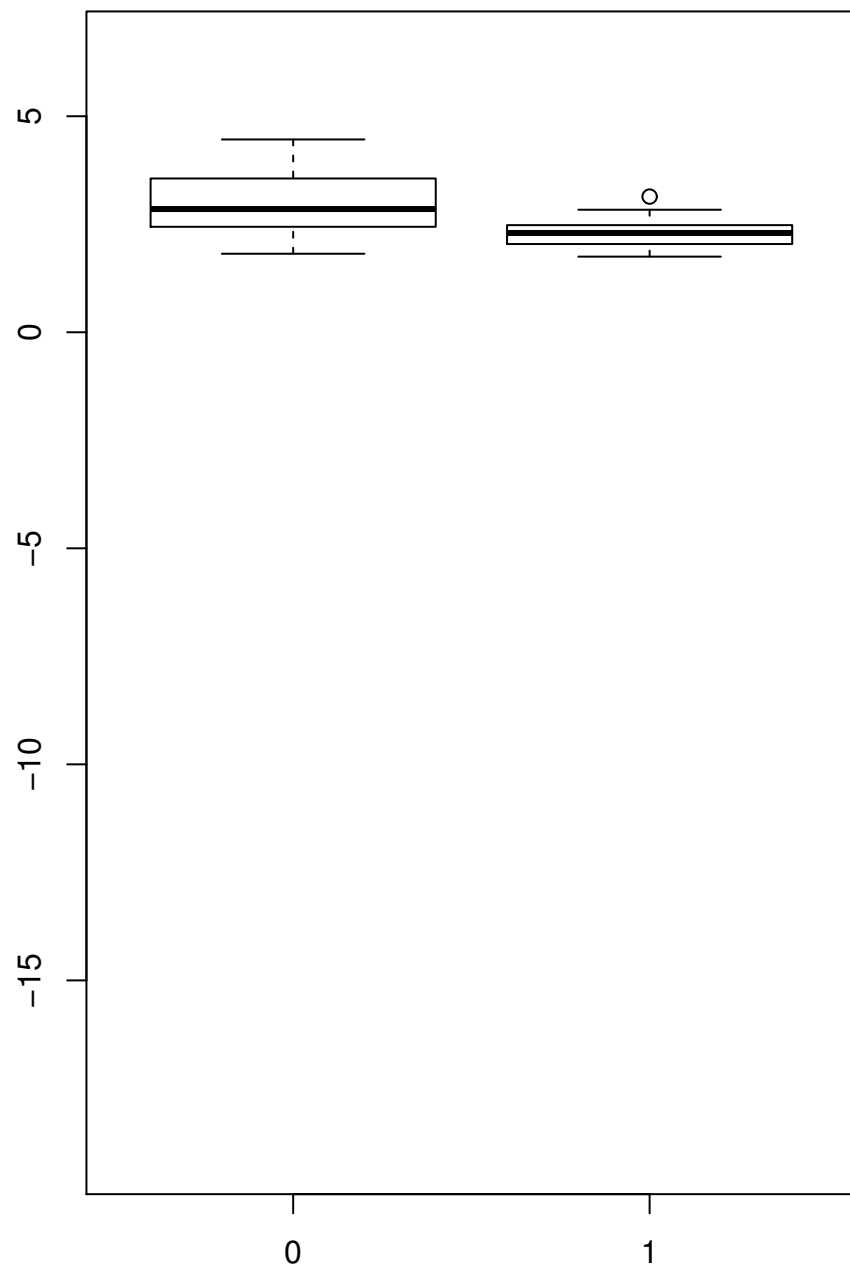

hsa-miR-542-5p  
(GSE67139)

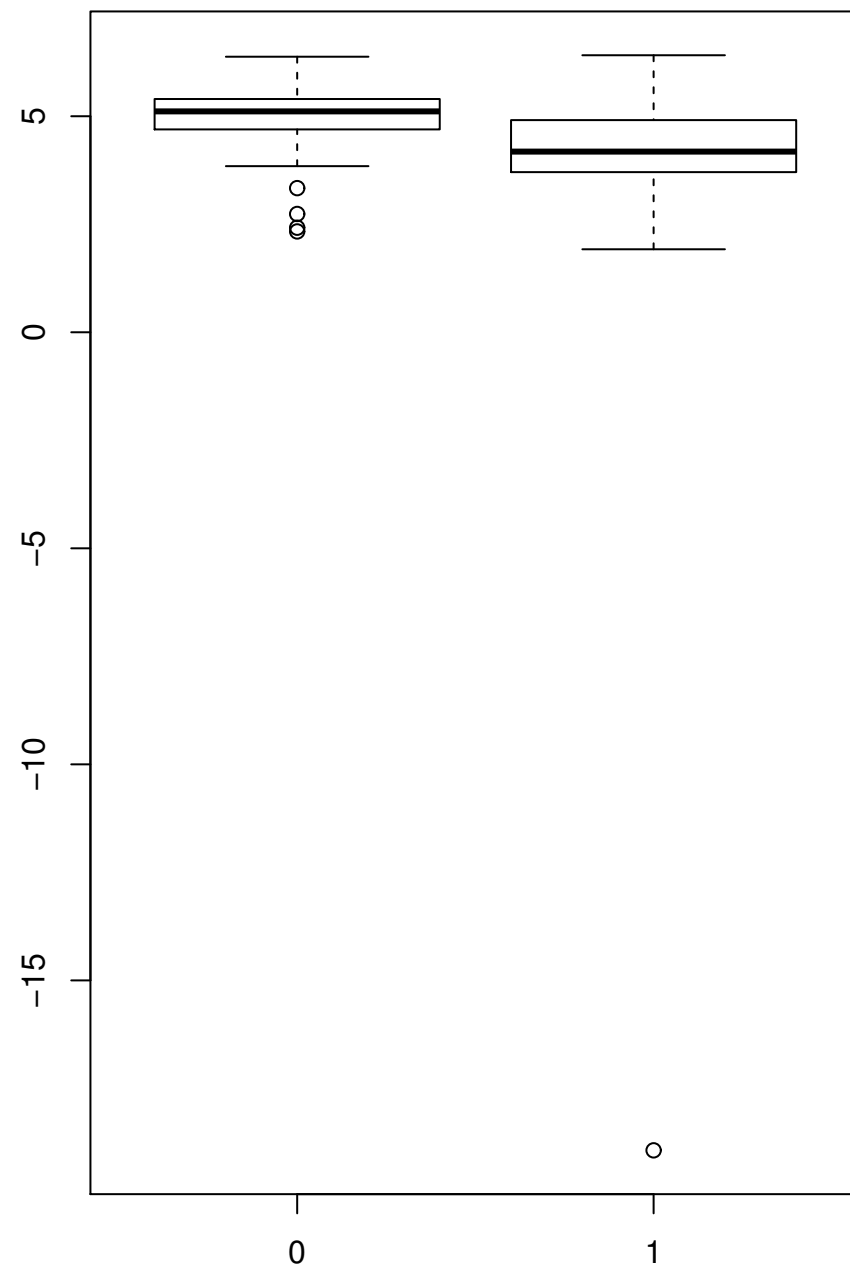

**hsa-miR-548b-3p  
(GSE67138)**

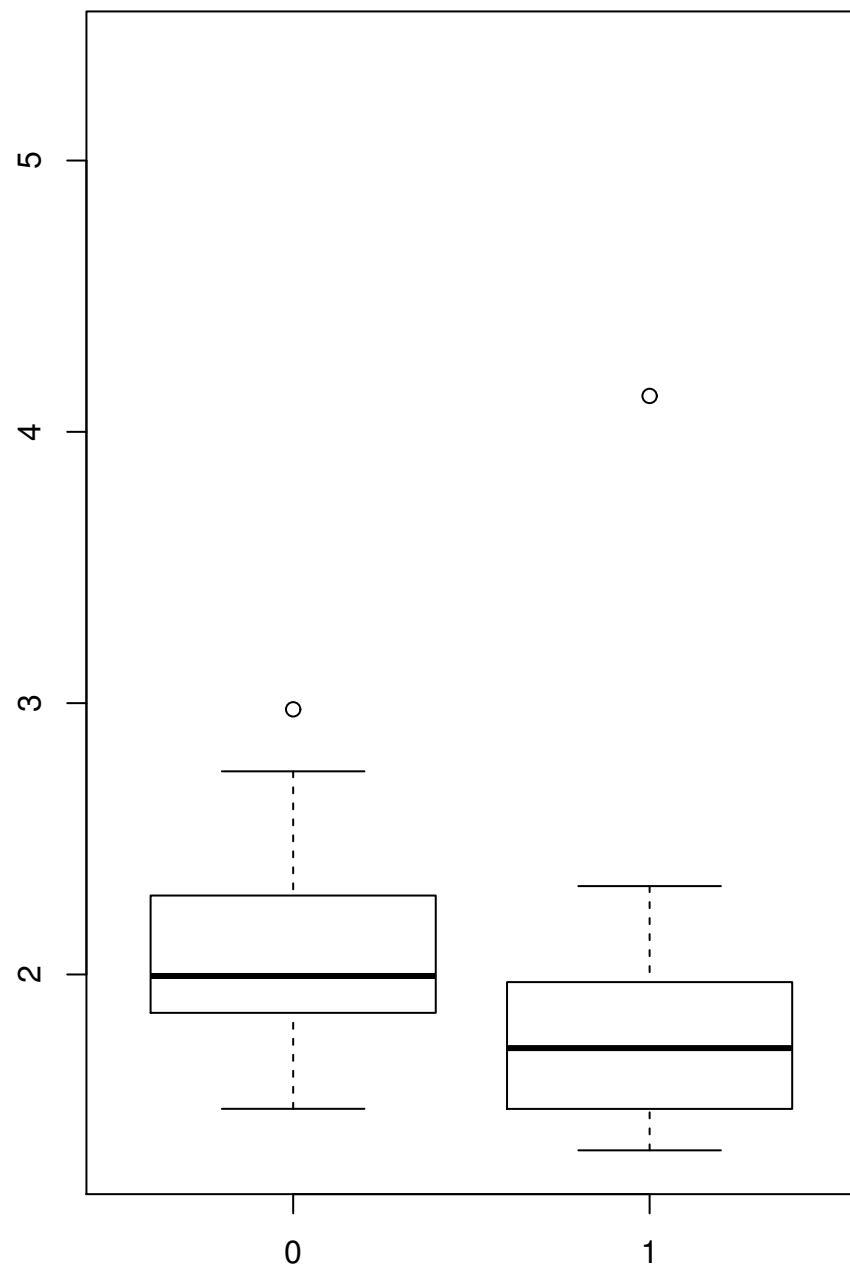

**hsa-miR-548b-3p  
(GSE67139)**

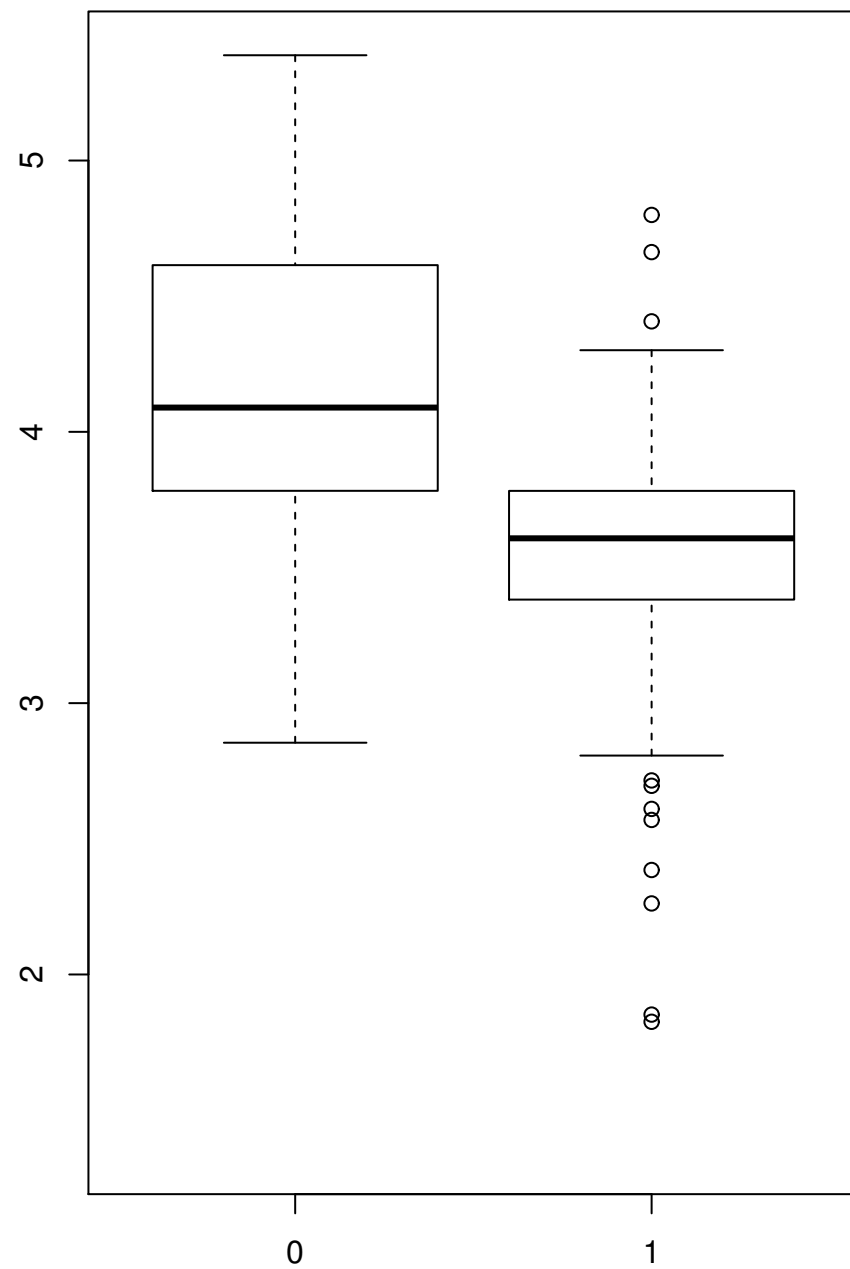

**hsa-miR-548o**  
**(GSE67138)**

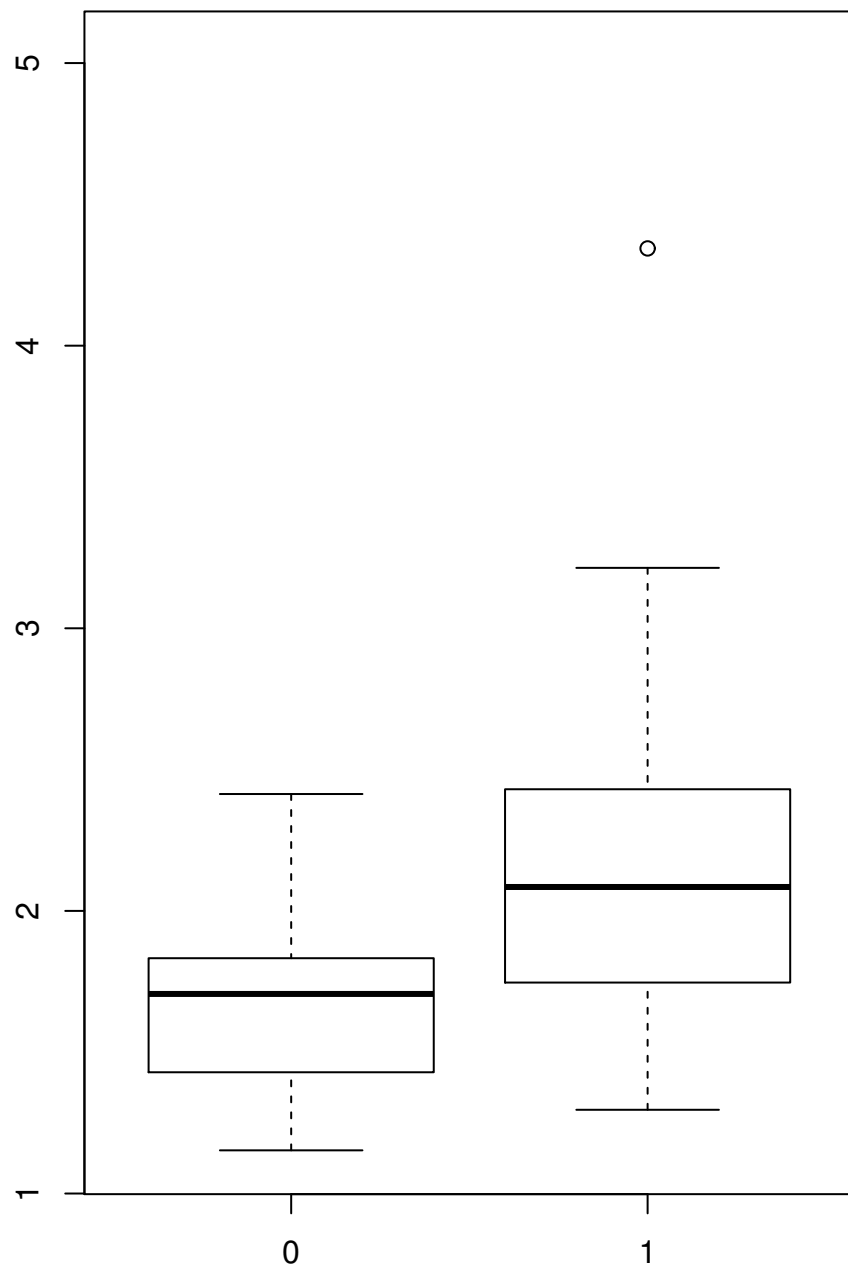

**hsa-miR-548o**  
**(GSE67139)**

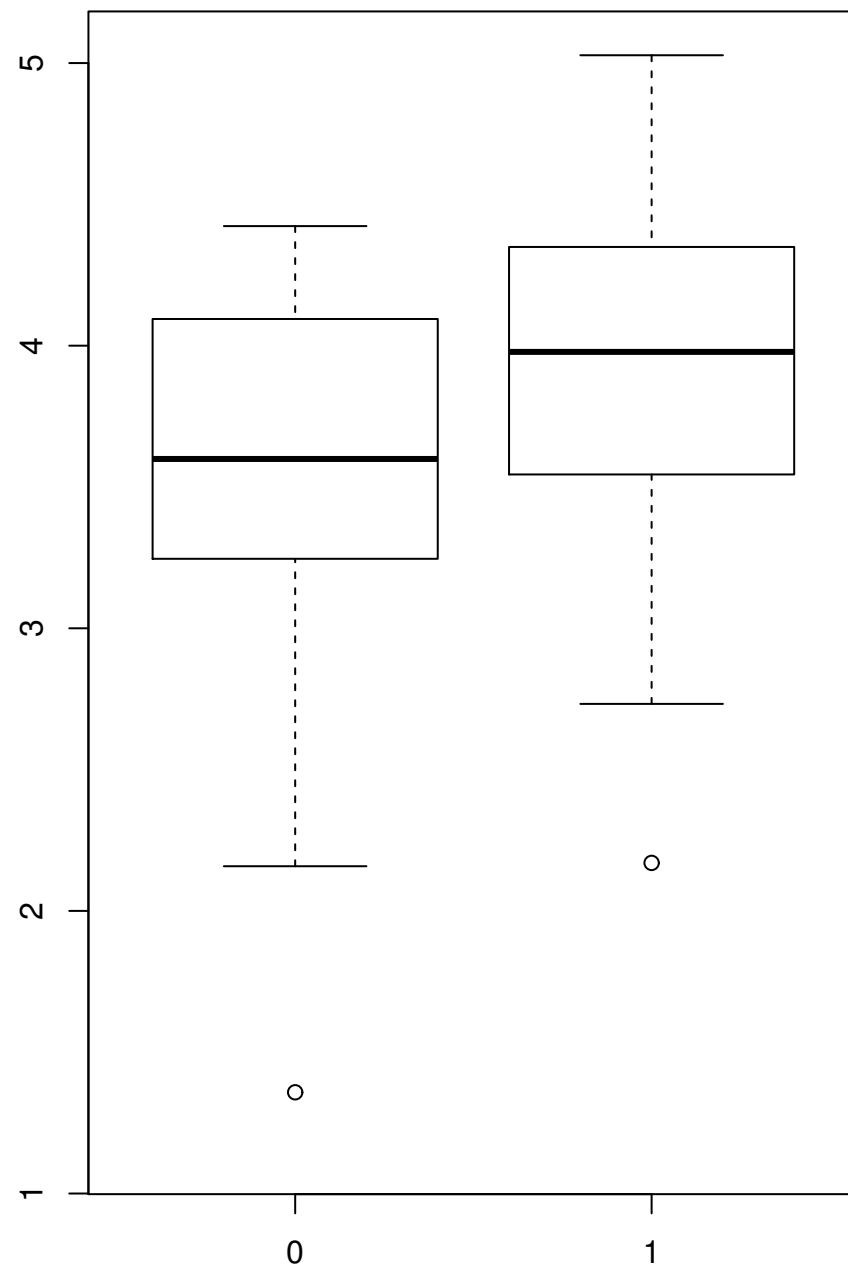

**hsa-miR-570**  
**(GSE67138)**

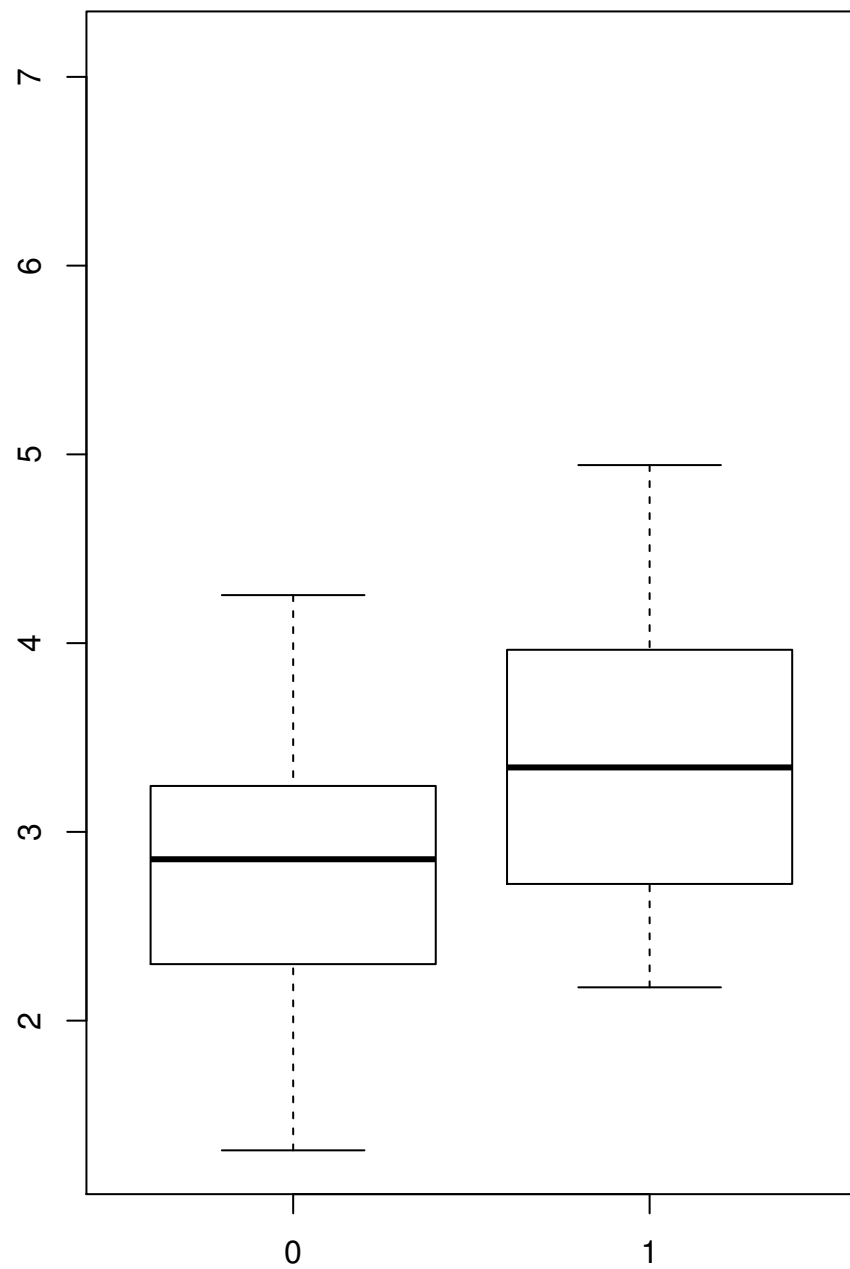

**hsa-miR-570**  
**(GSE67139)**

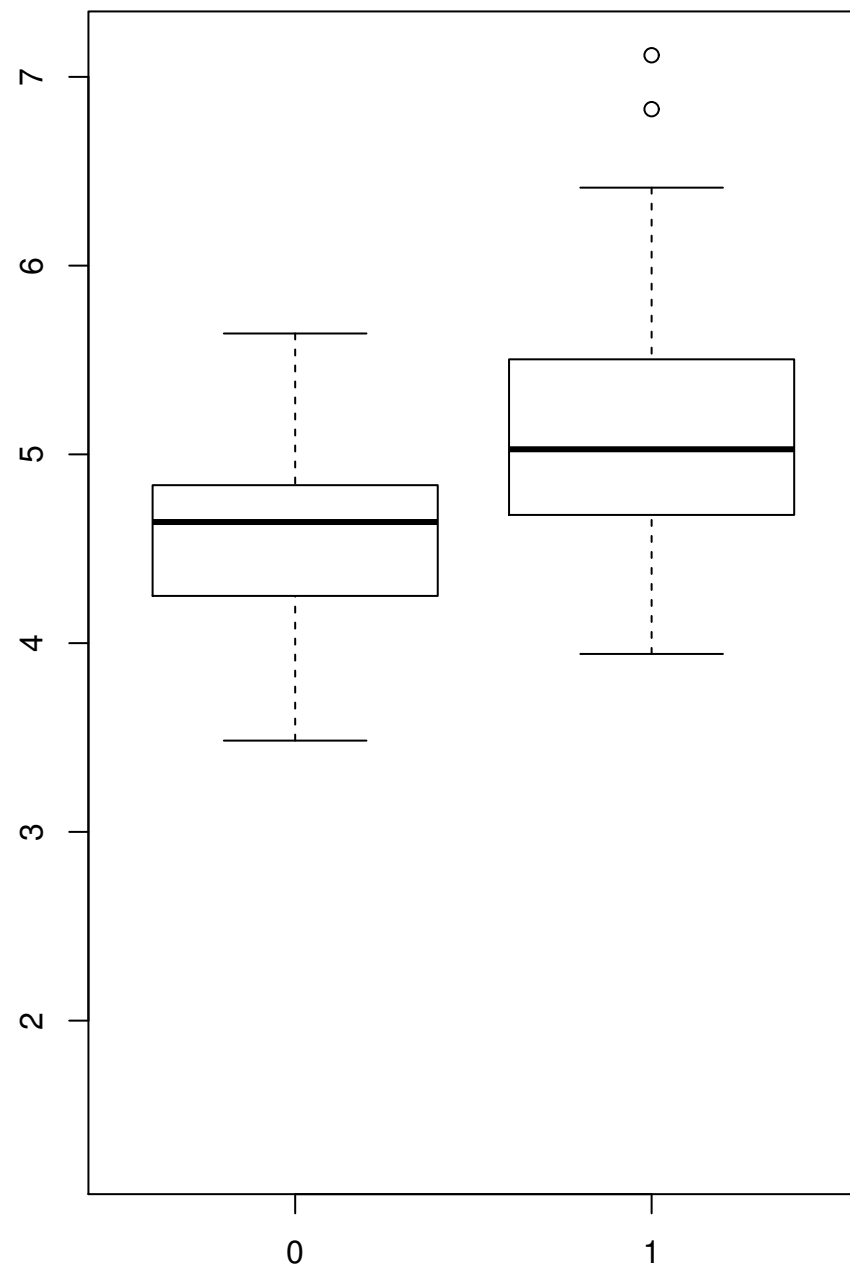

**hsa-miR-584**  
**(GSE67138)**

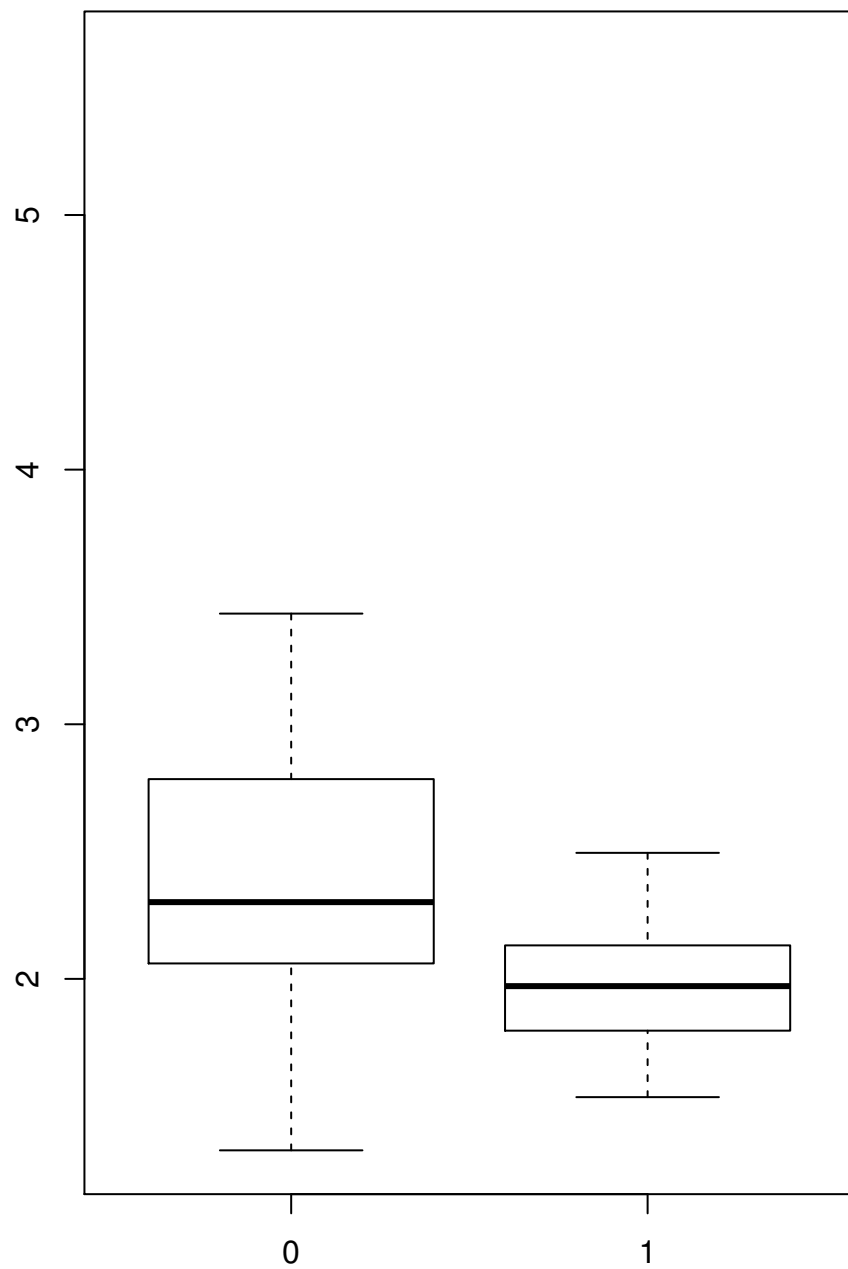

**hsa-miR-584**  
**(GSE67139)**

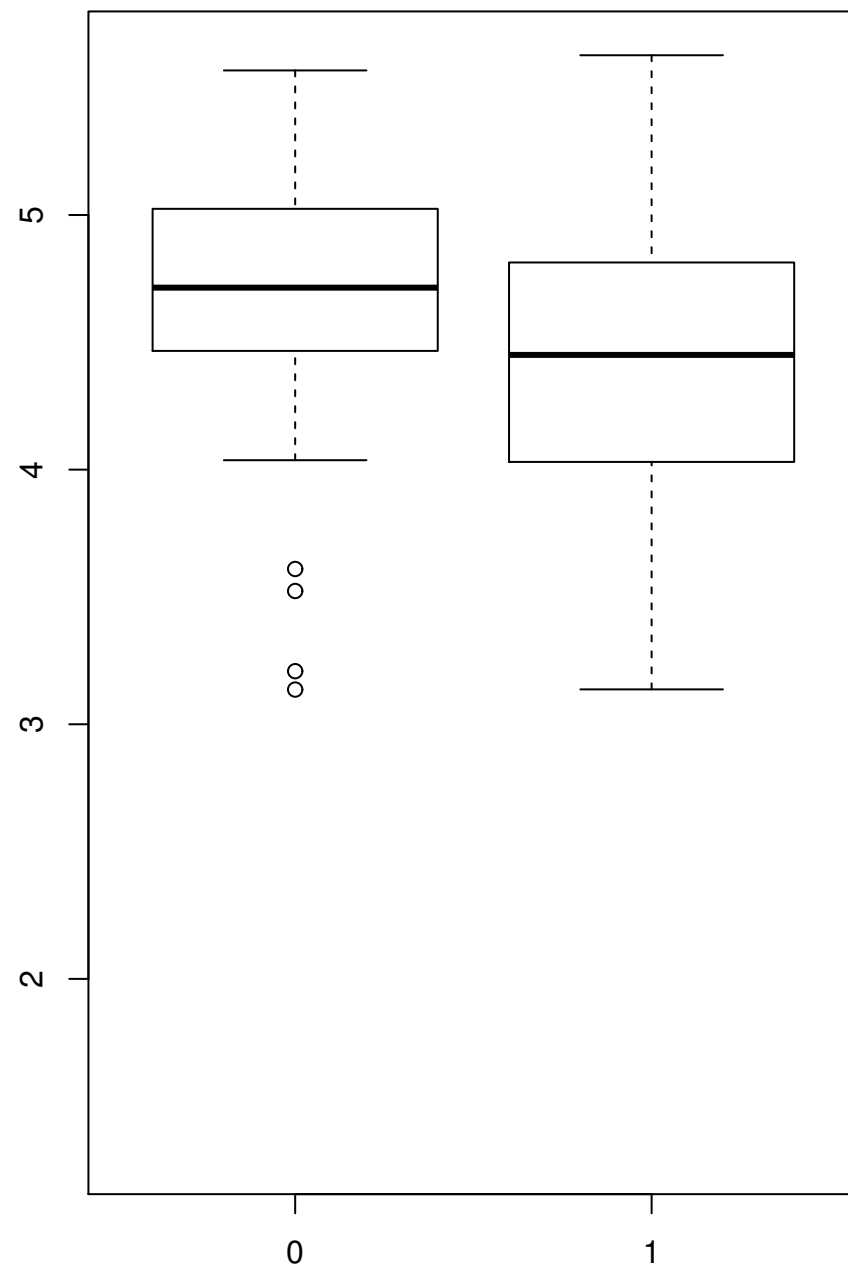

**hsa-miR-603  
(GSE67138)**

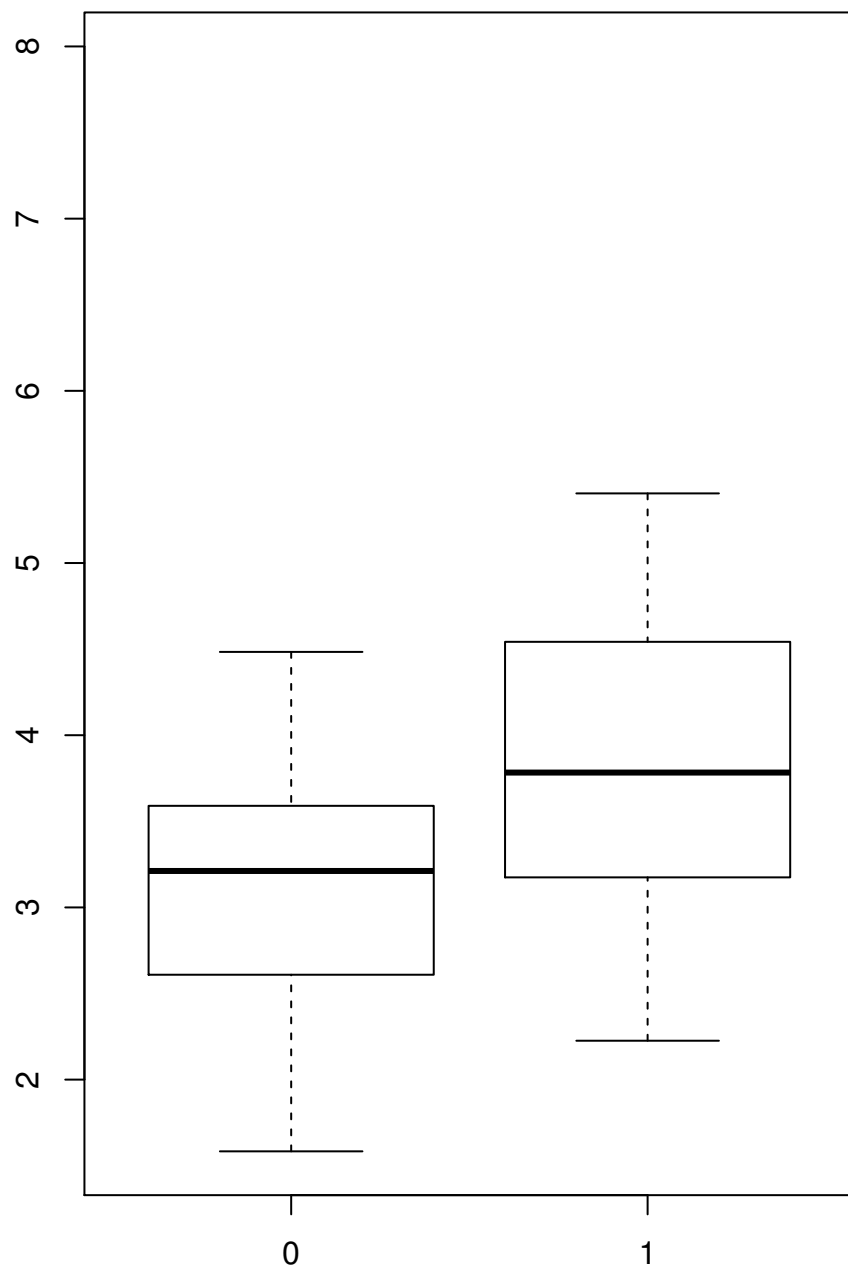

**hsa-miR-603  
(GSE67139)**

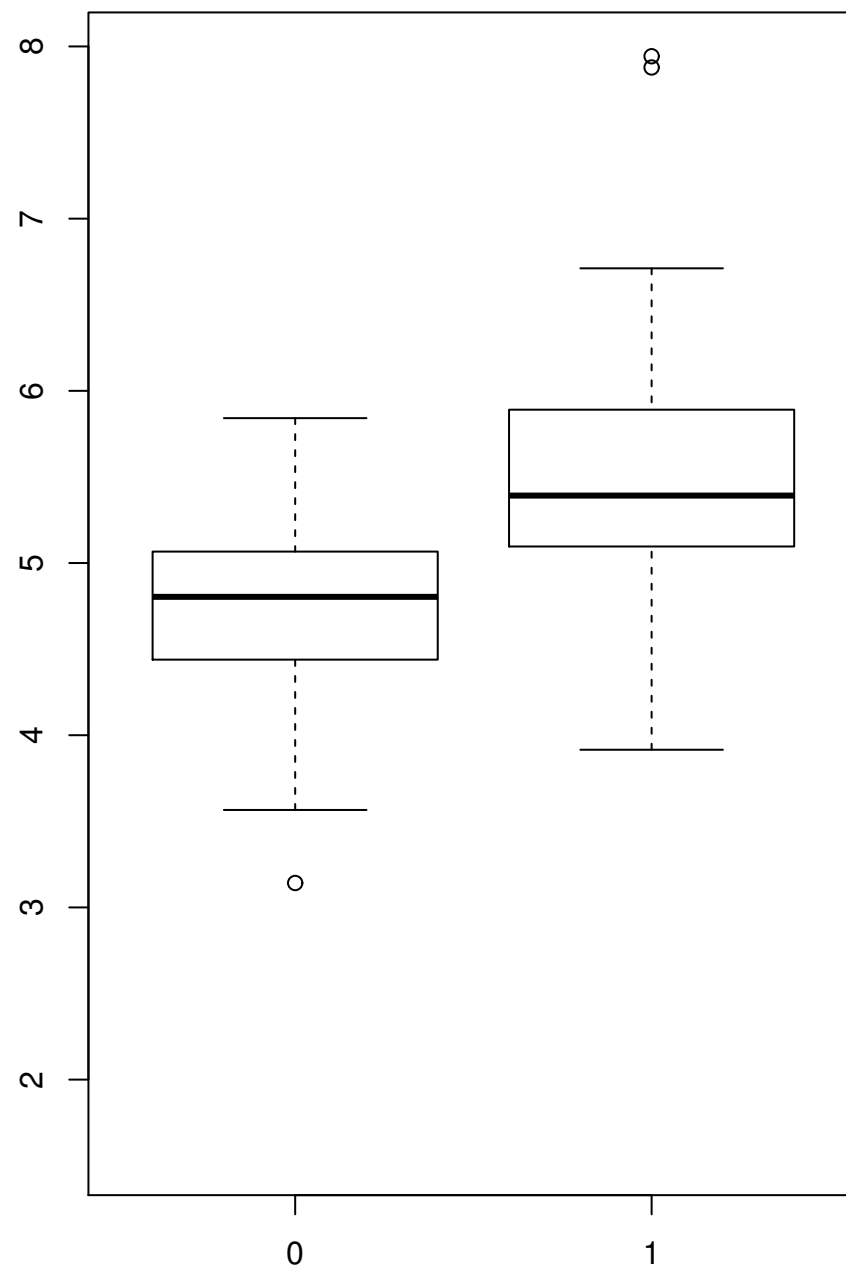



**hsa-miR-621  
(GSE67138)**

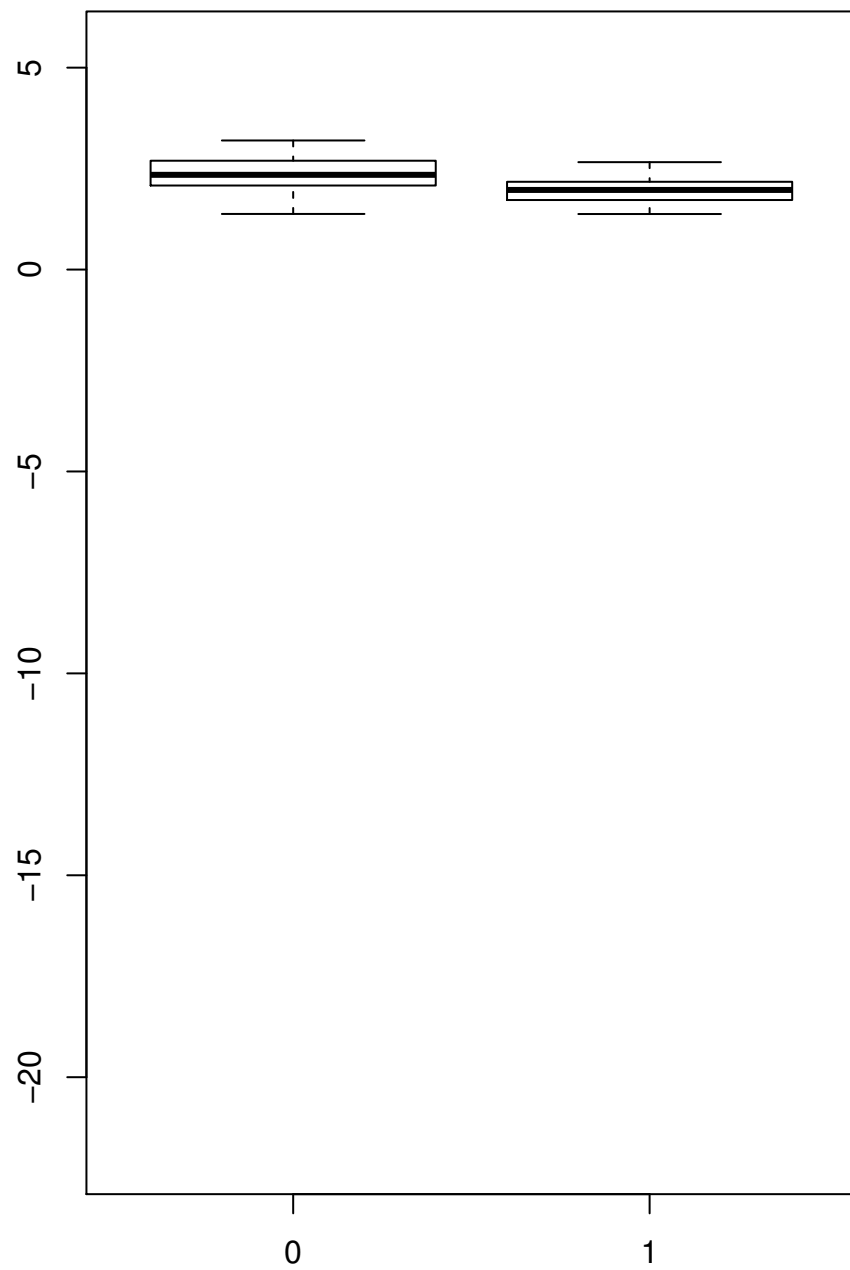

**hsa-miR-621  
(GSE67139)**

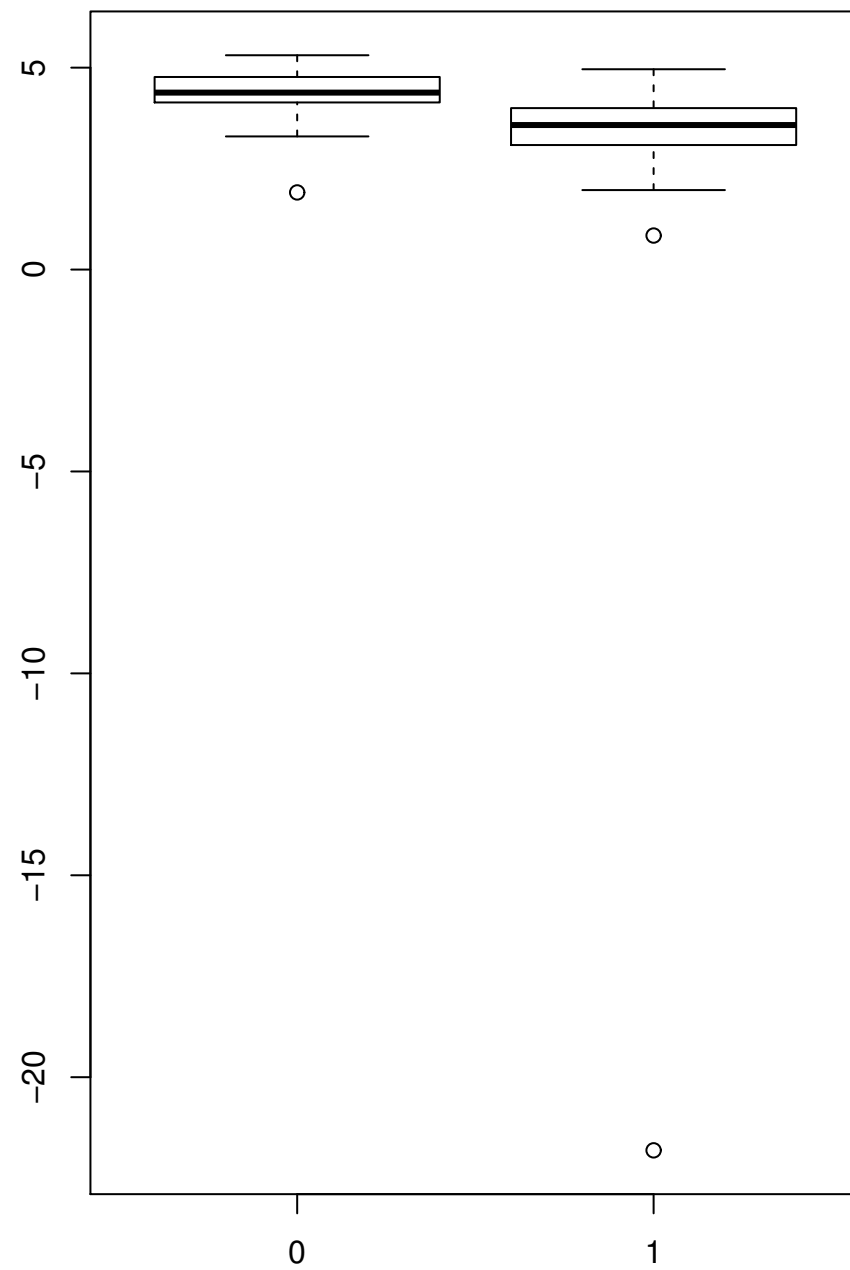

**hsa-miR-623**  
**(GSE67138)**

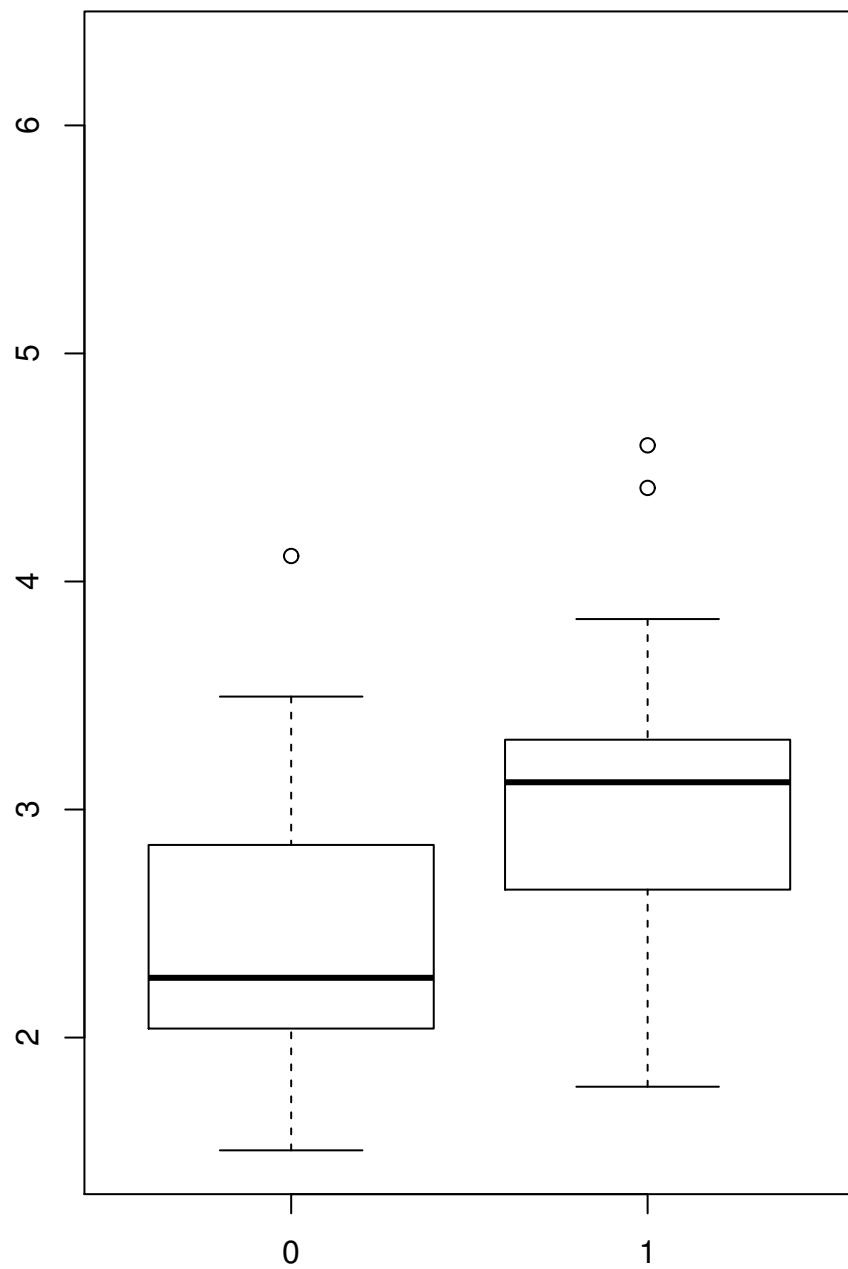

**hsa-miR-623**  
**(GSE67139)**

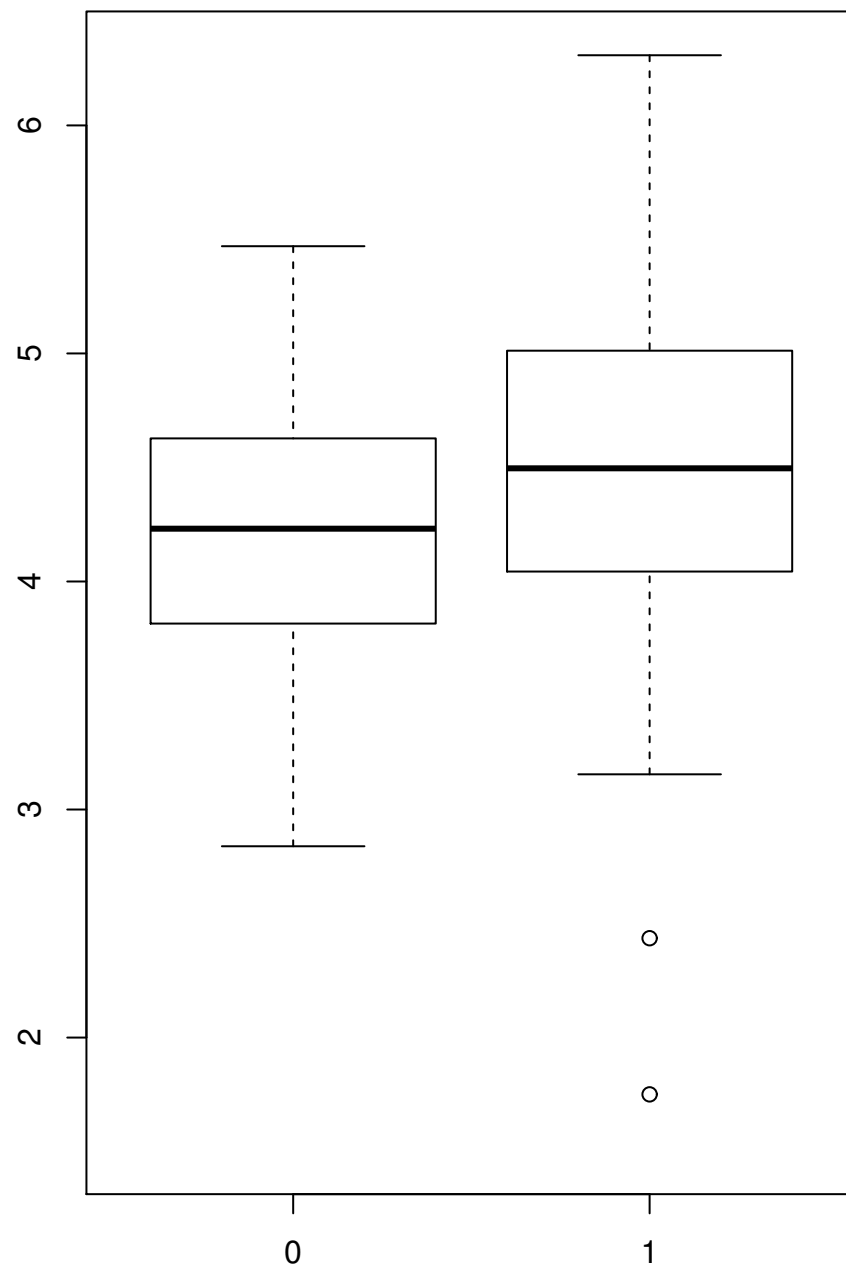

**hsa-miR-625  
(GSE67138)**

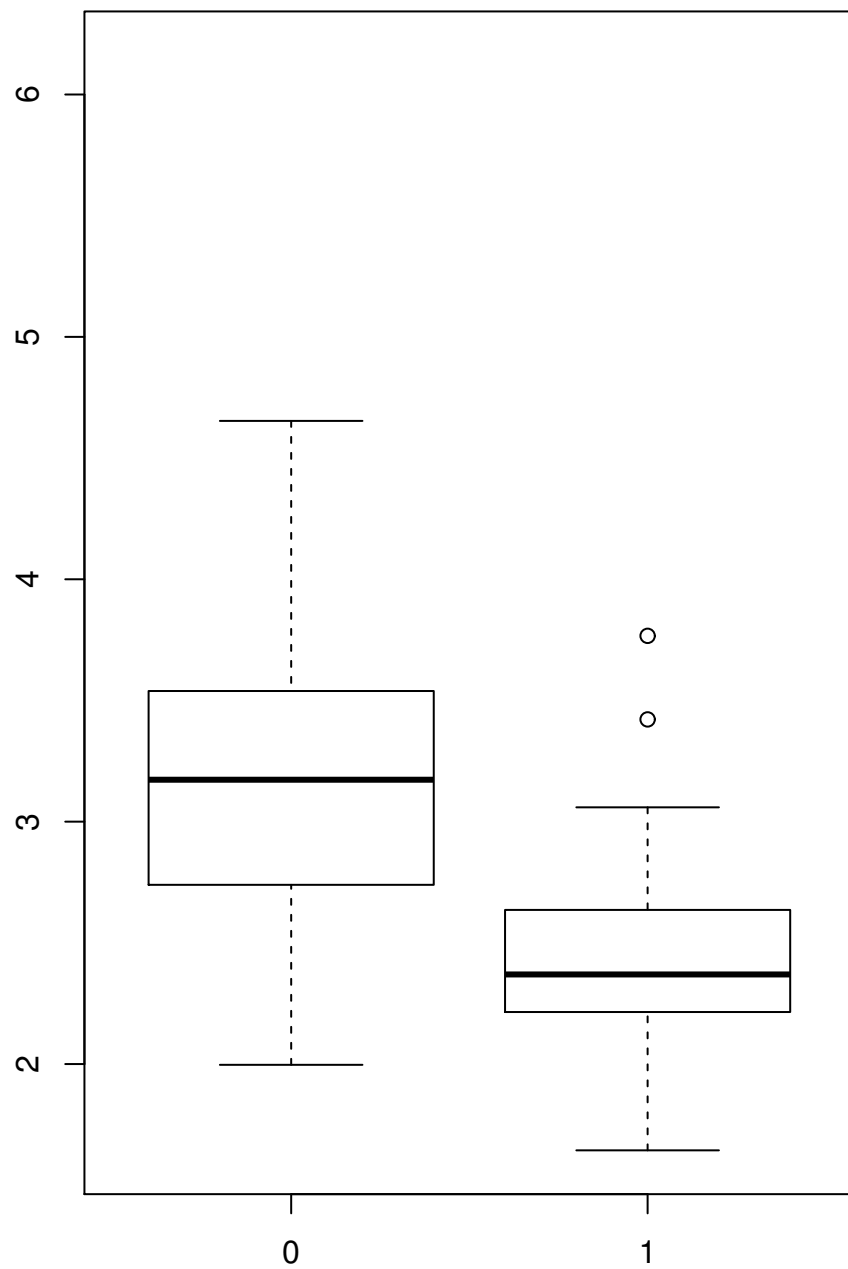

**hsa-miR-625  
(GSE67139)**

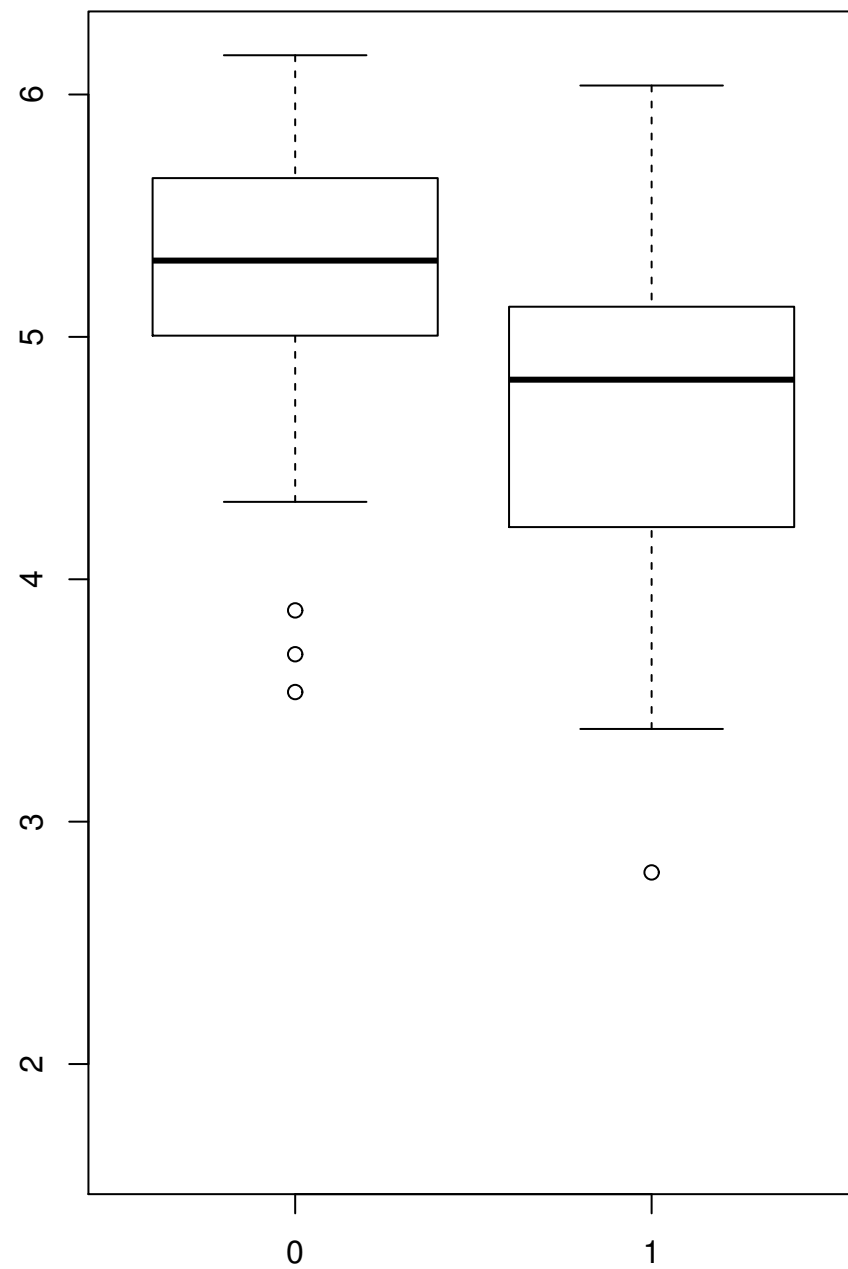

**hsa-miR-626  
(GSE67138)**

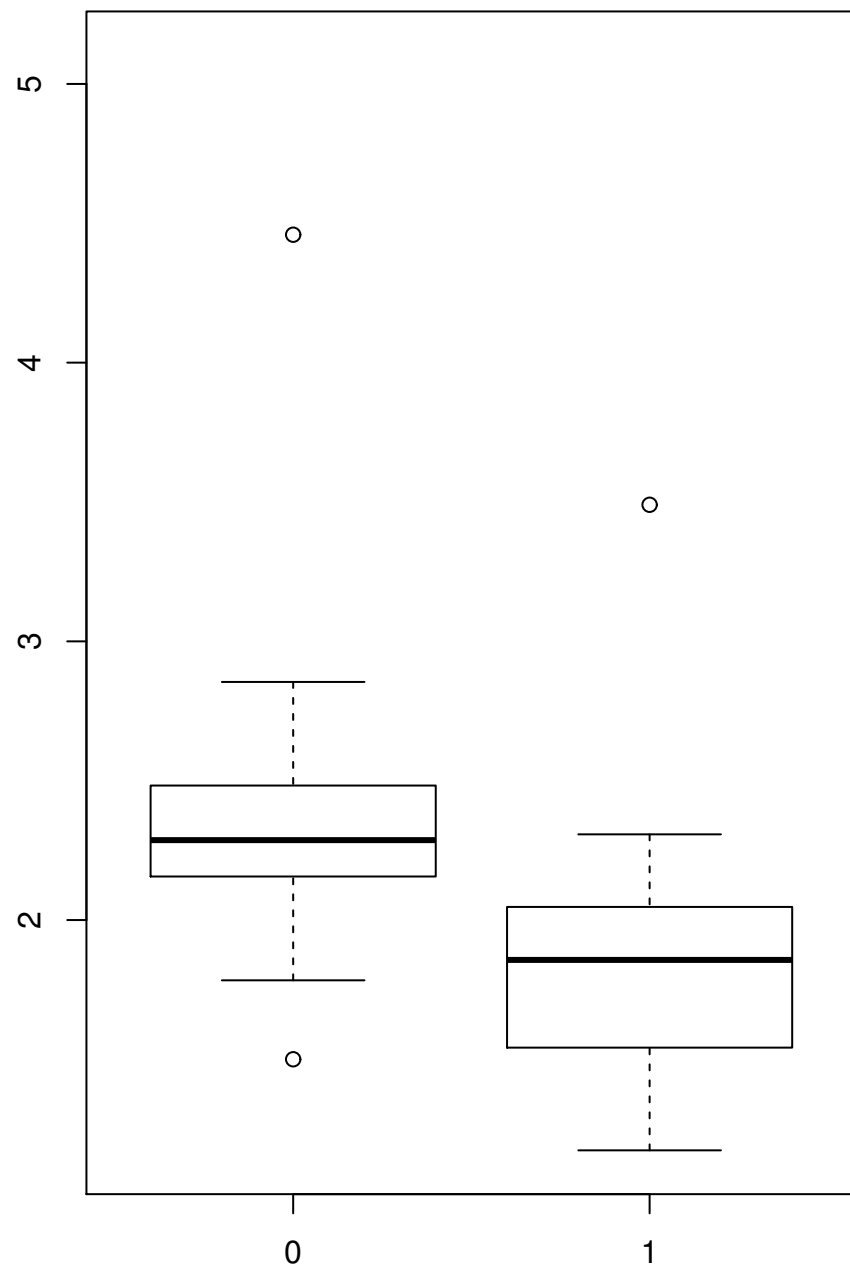

**hsa-miR-626  
(GSE67139)**

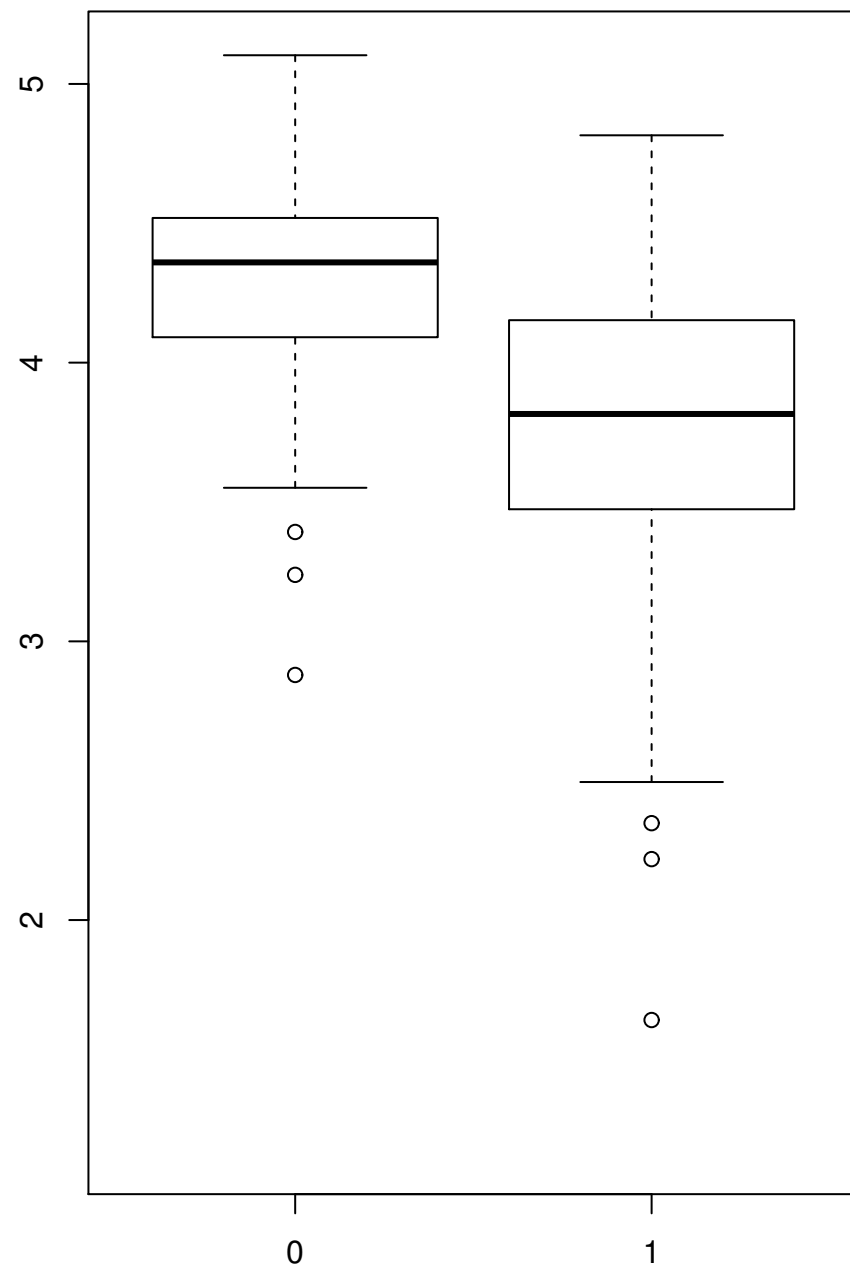

**hsa-miR-629  
(GSE67138)**

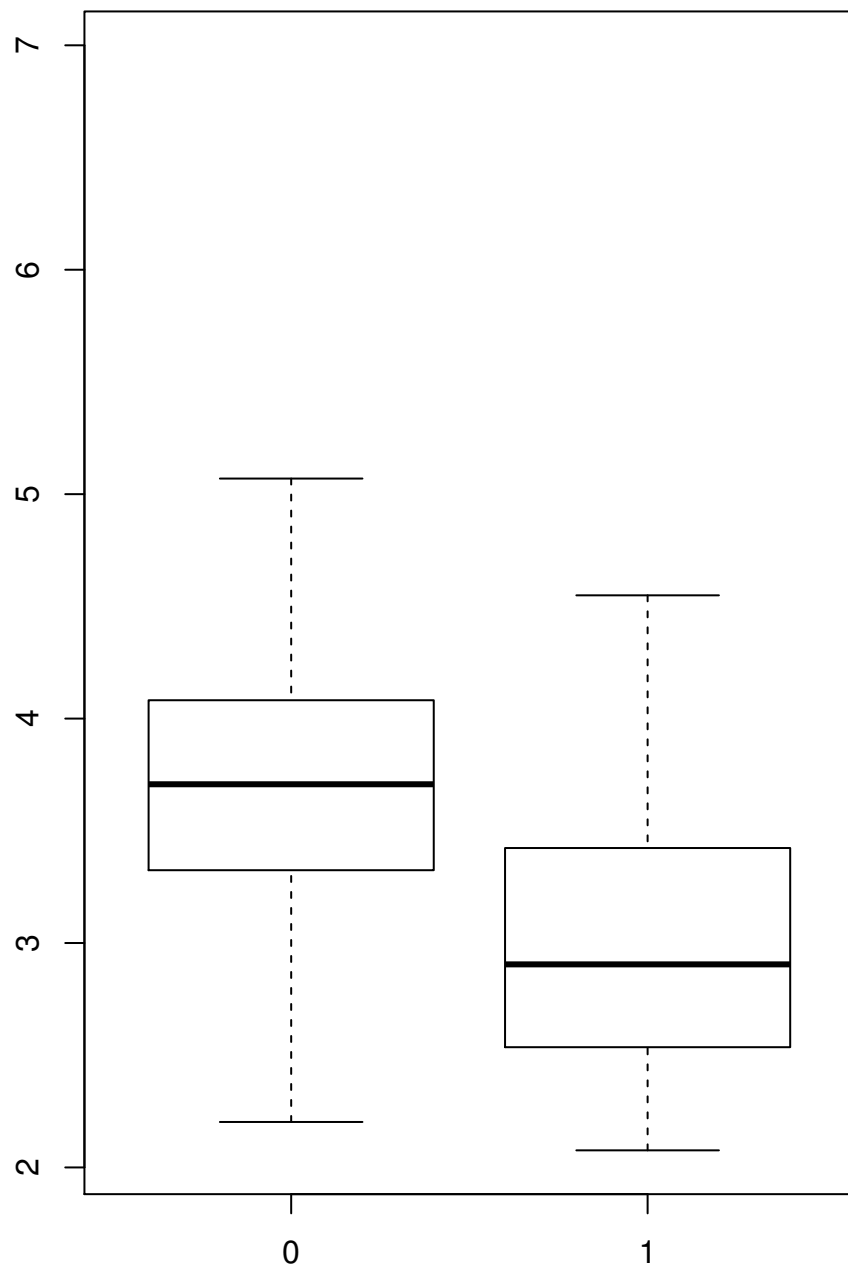

**hsa-miR-629  
(GSE67139)**

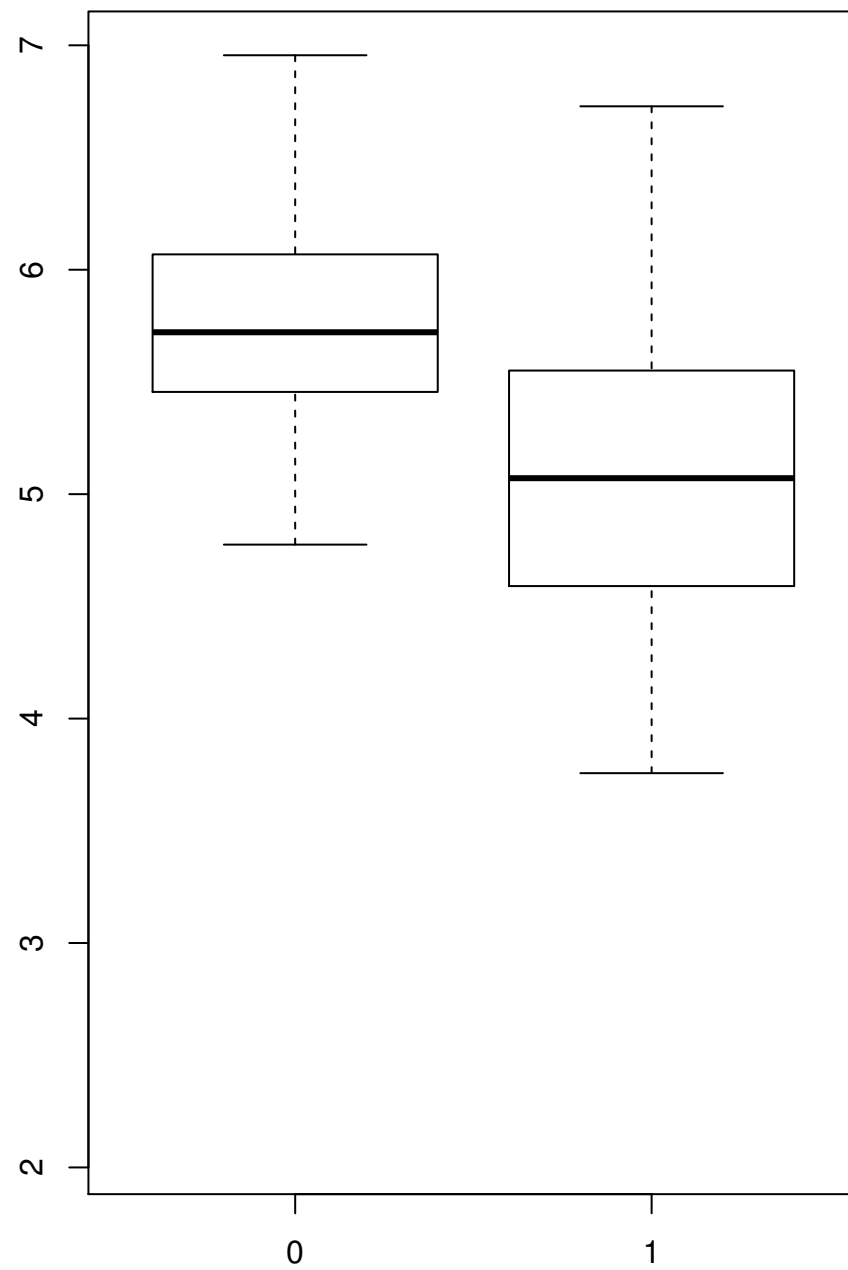

**hsa-miR-635  
(GSE67138)**

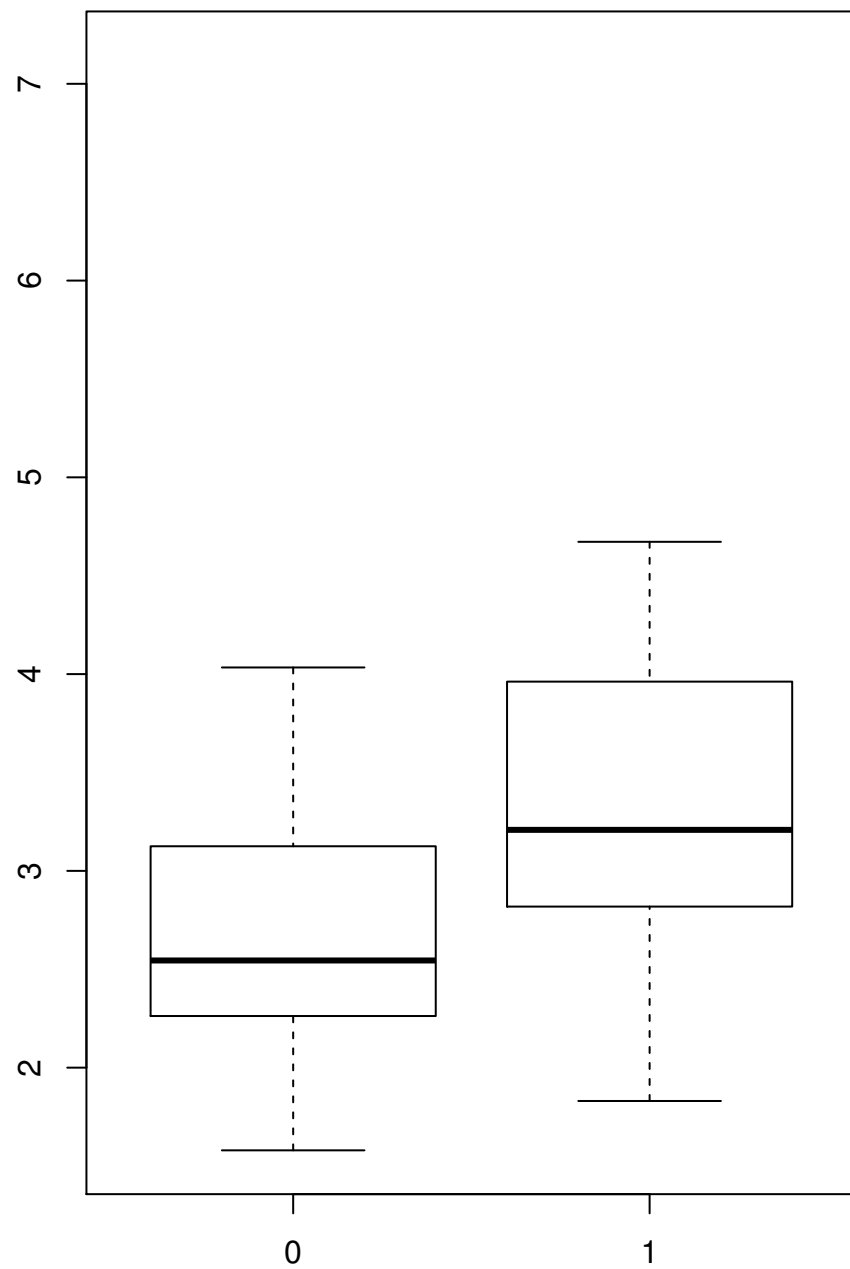

**hsa-miR-635  
(GSE67139)**

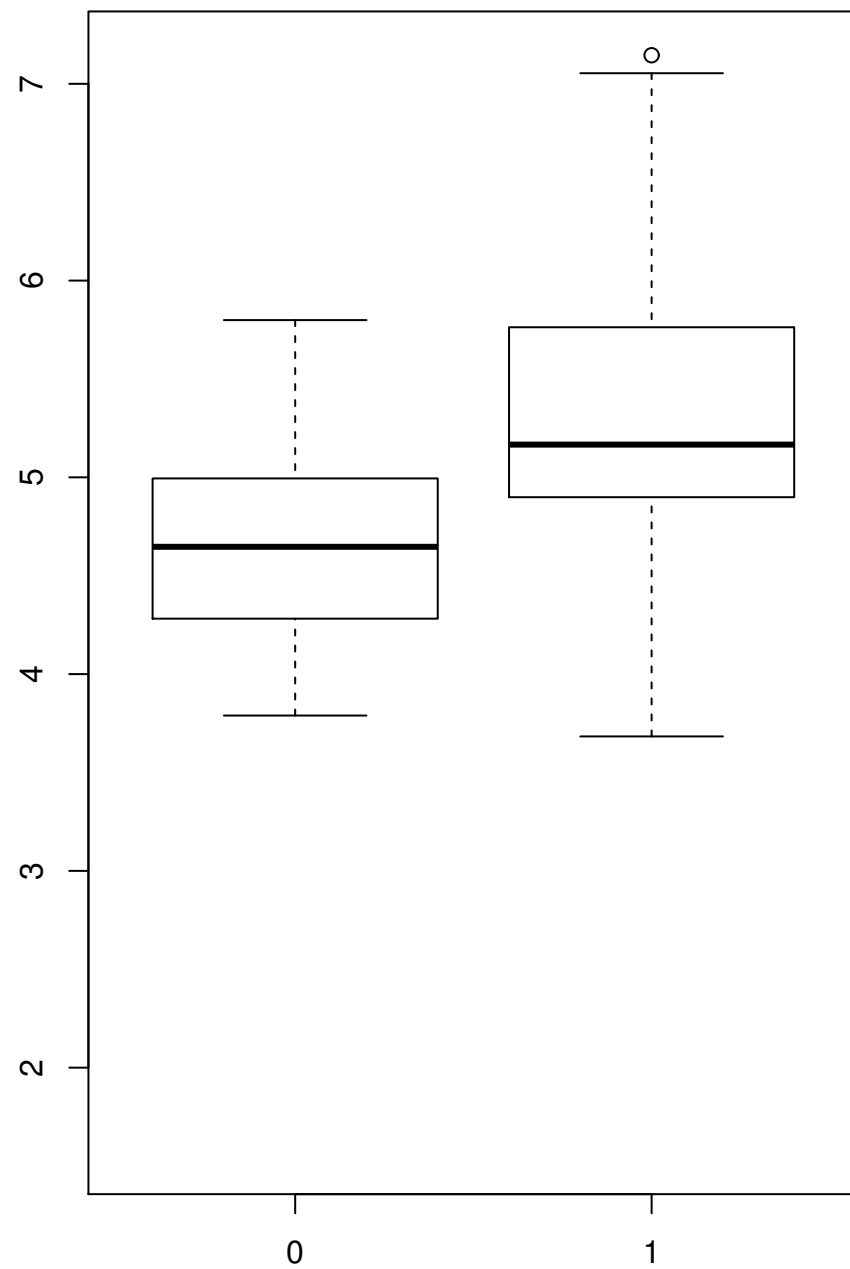

hsa-miR-639  
(GSE67138)

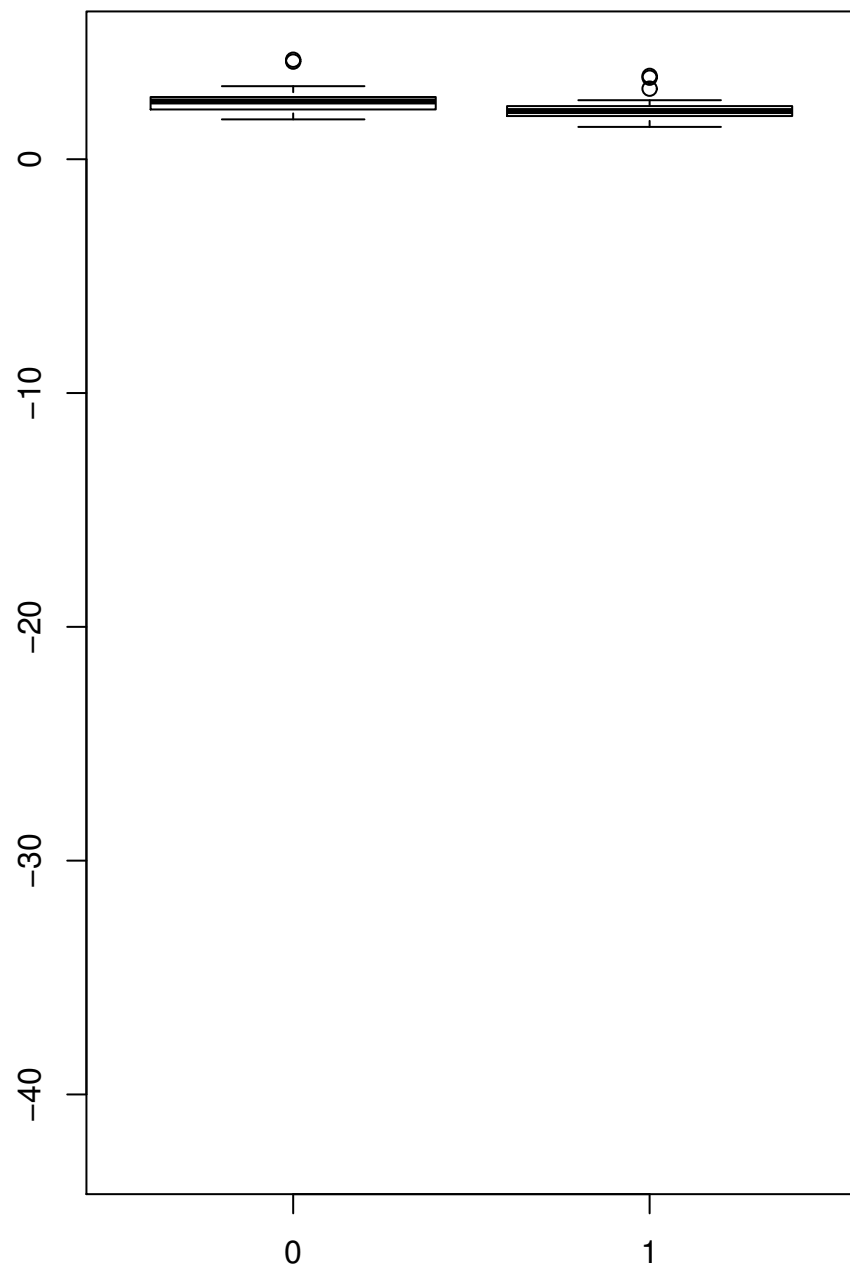

hsa-miR-639  
(GSE67139)

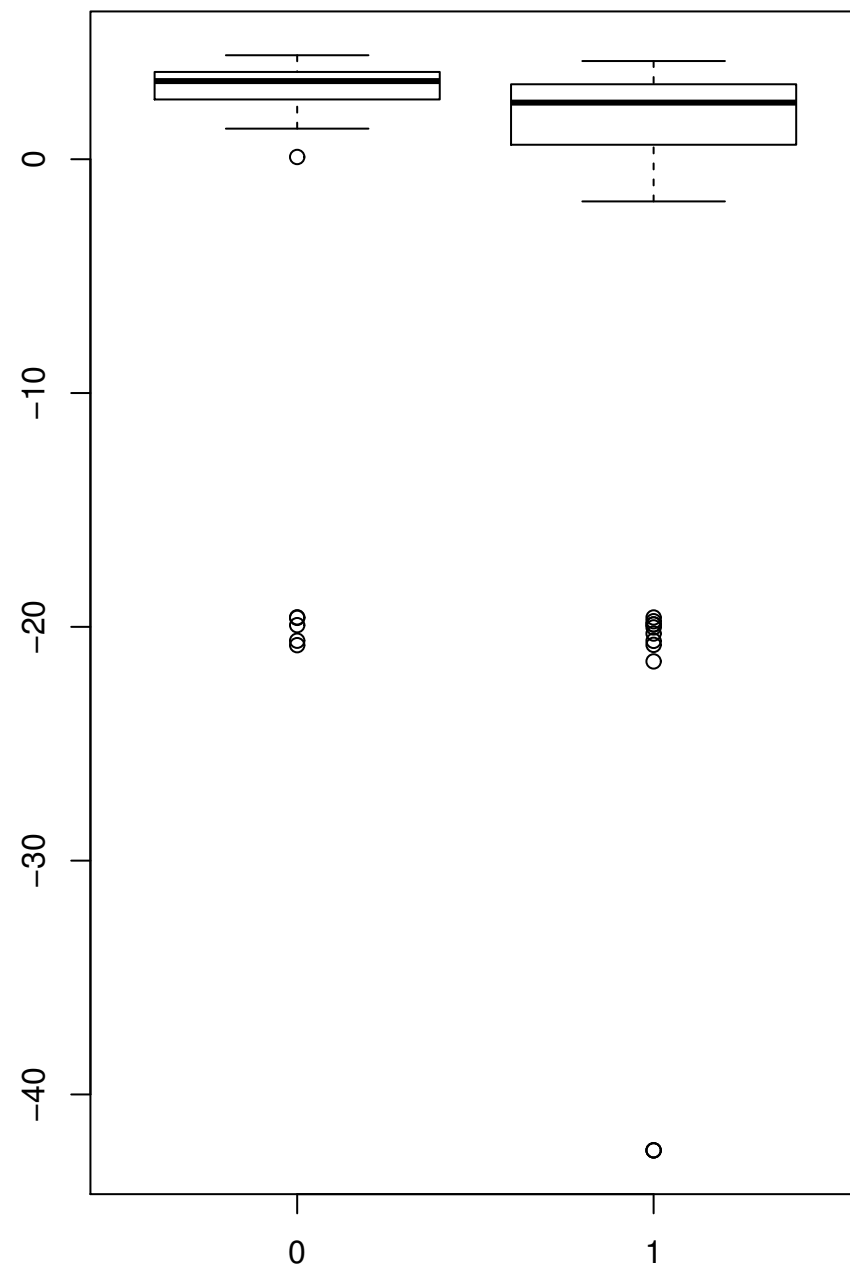

hsa-miR-654-5p  
(GSE67138)

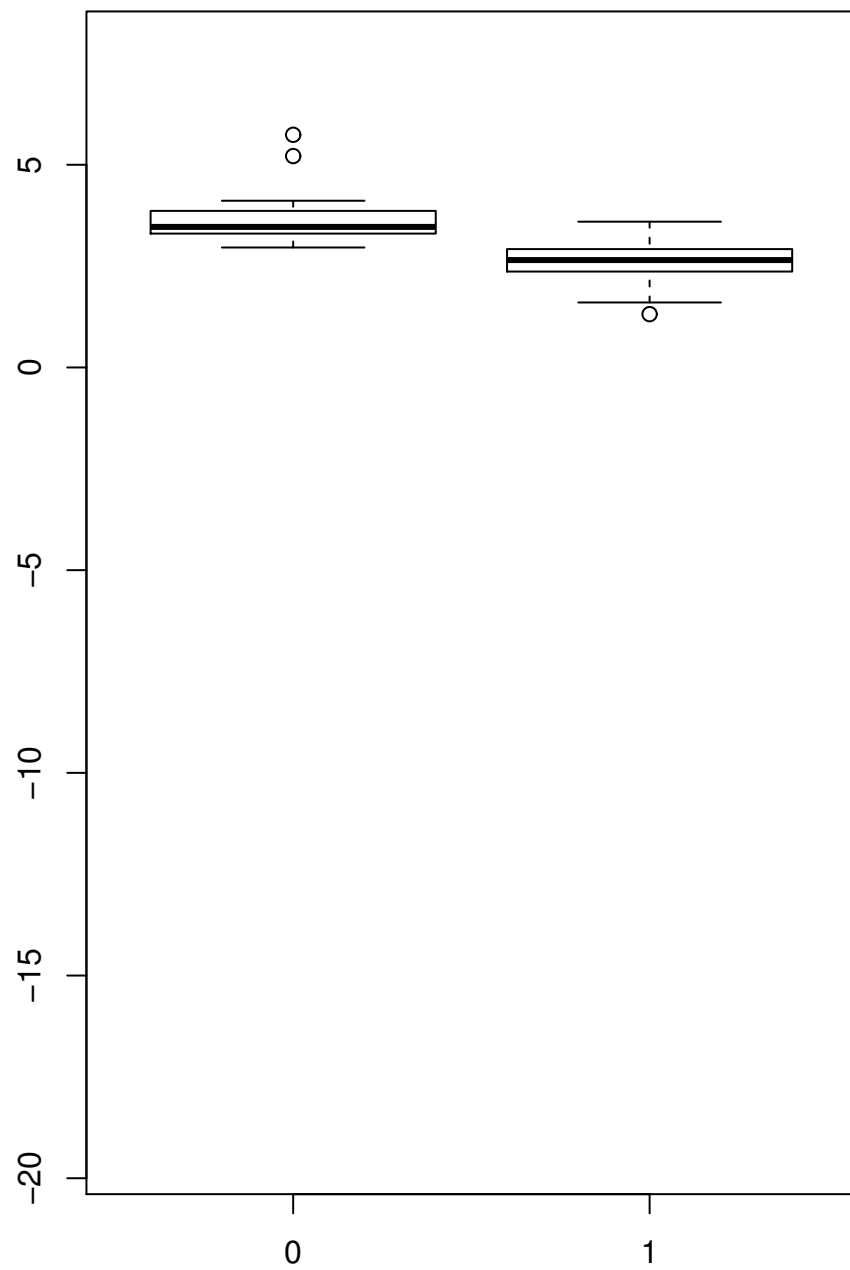

hsa-miR-654-5p  
(GSE67139)

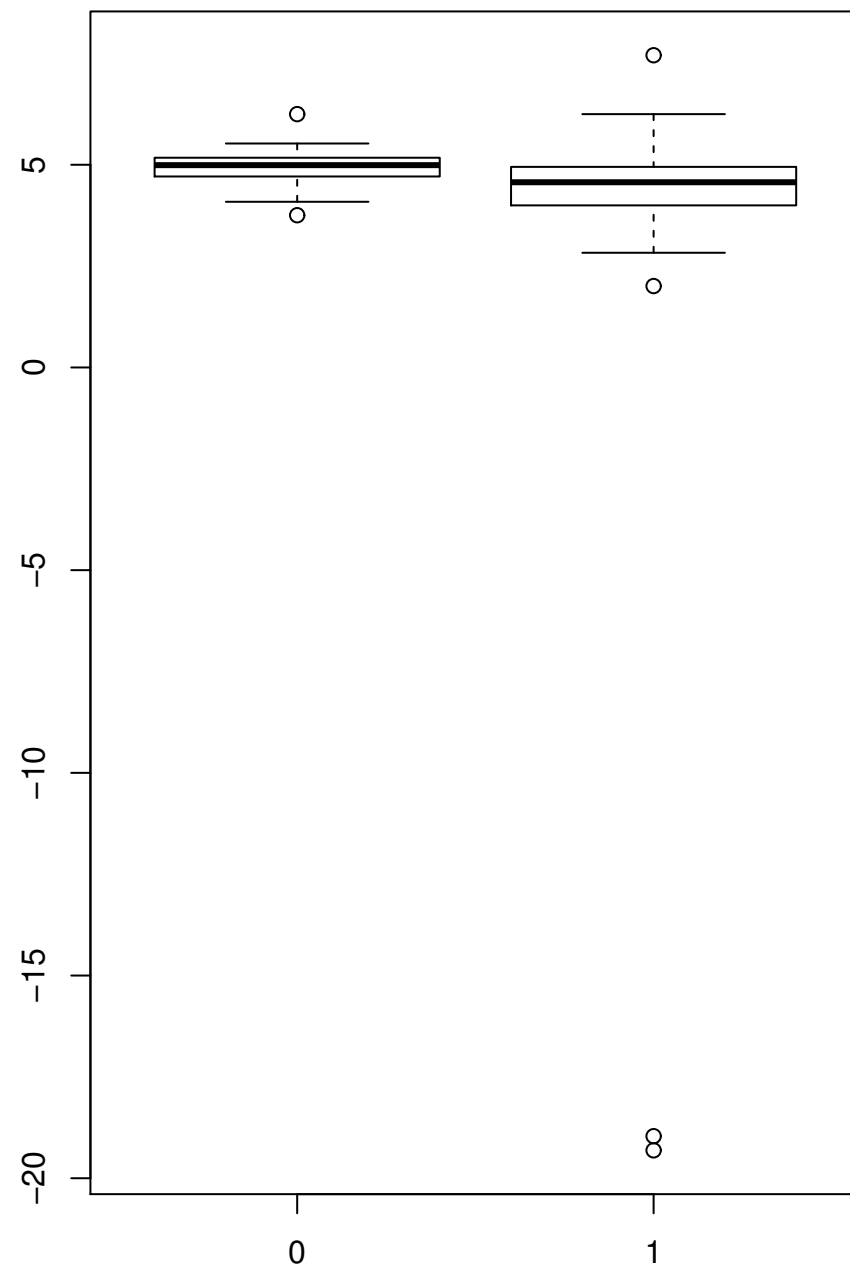



**hsa-miR-660  
(GSE67138)**

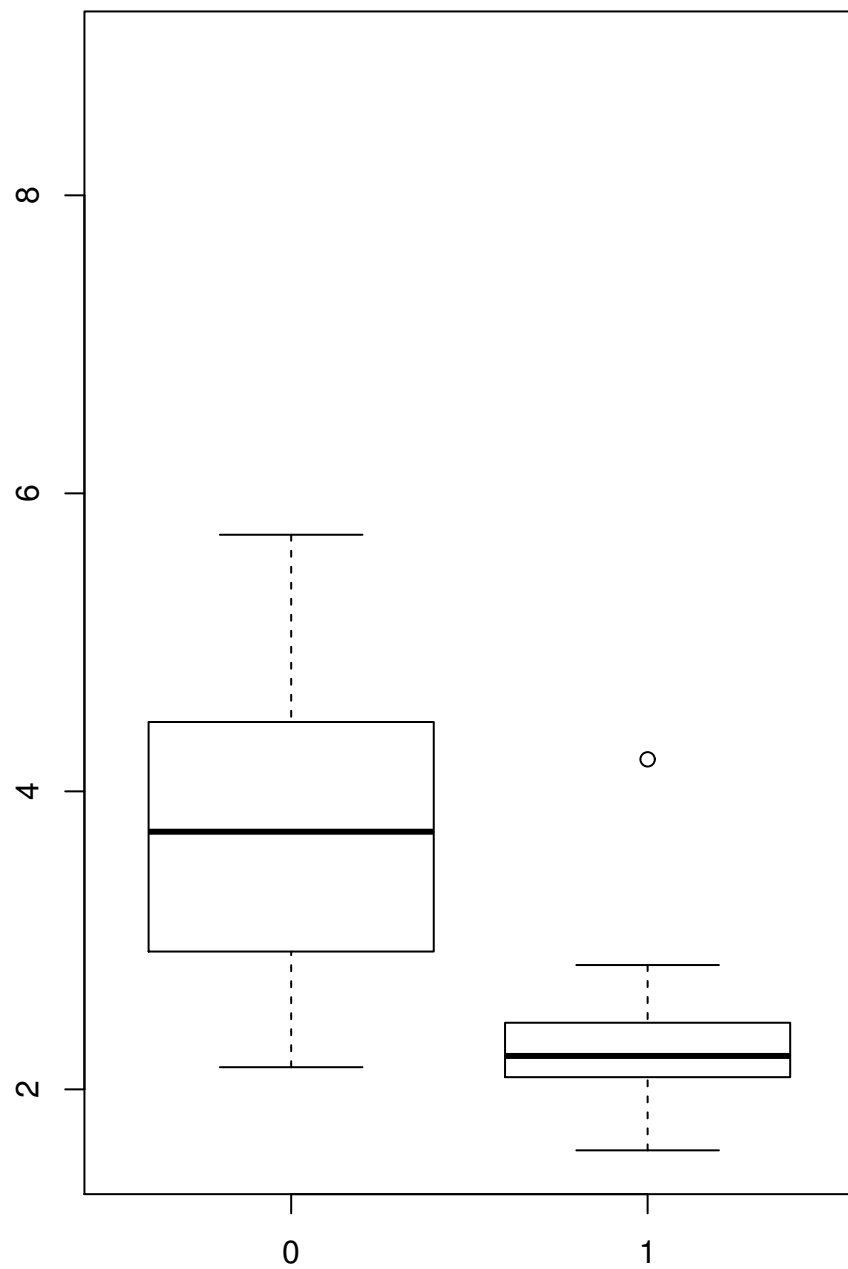

**hsa-miR-660  
(GSE67139)**

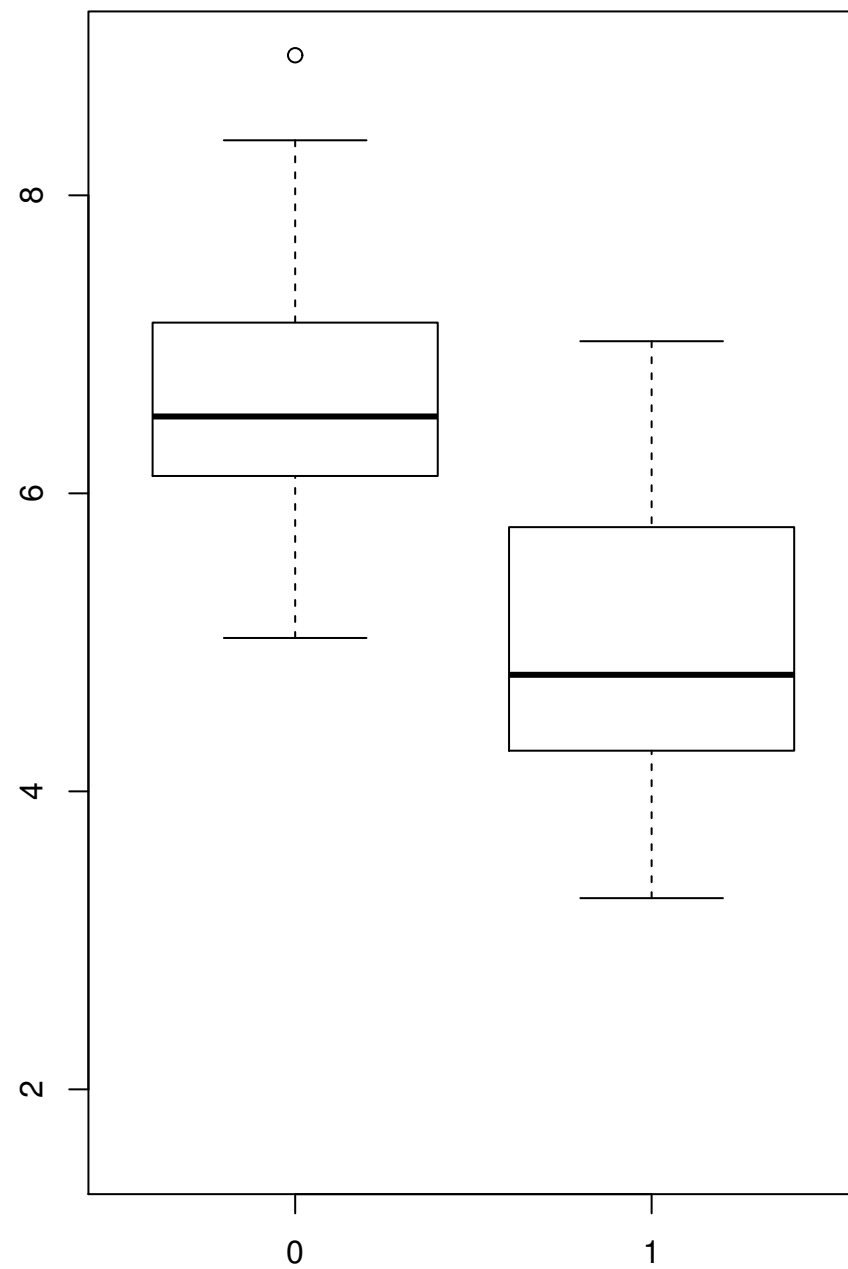

**hsa-miR-663  
(GSE67138)**

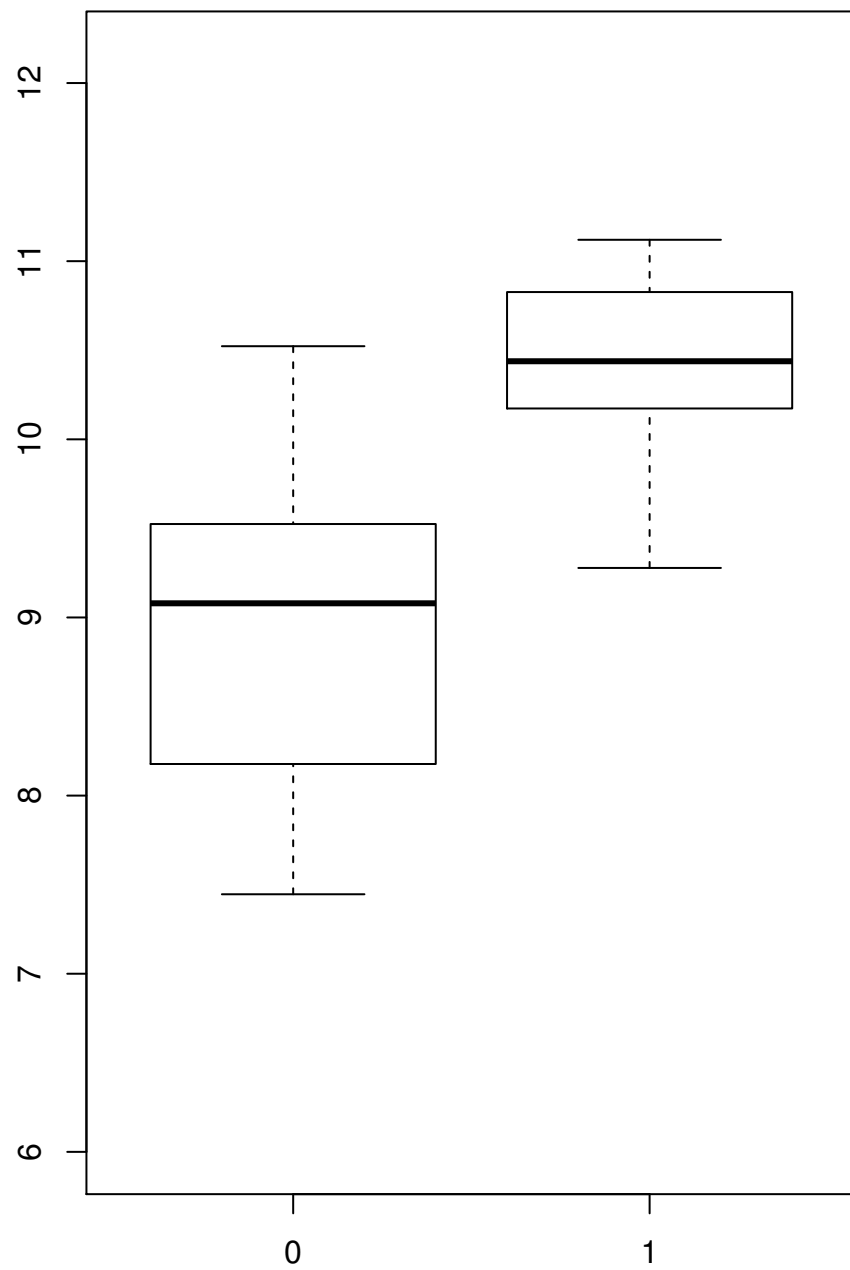

**hsa-miR-663  
(GSE67139)**

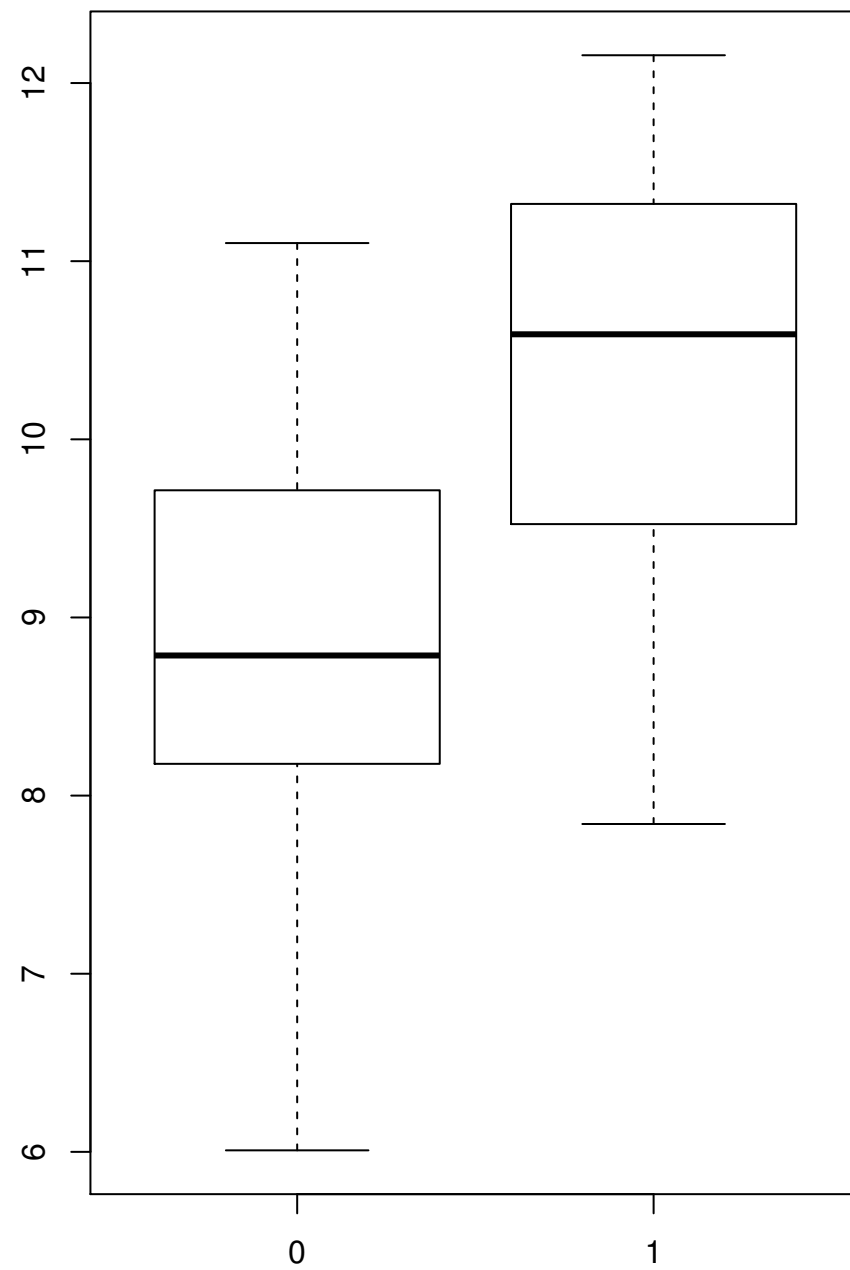

**hsa-miR-663b  
(GSE67138)**

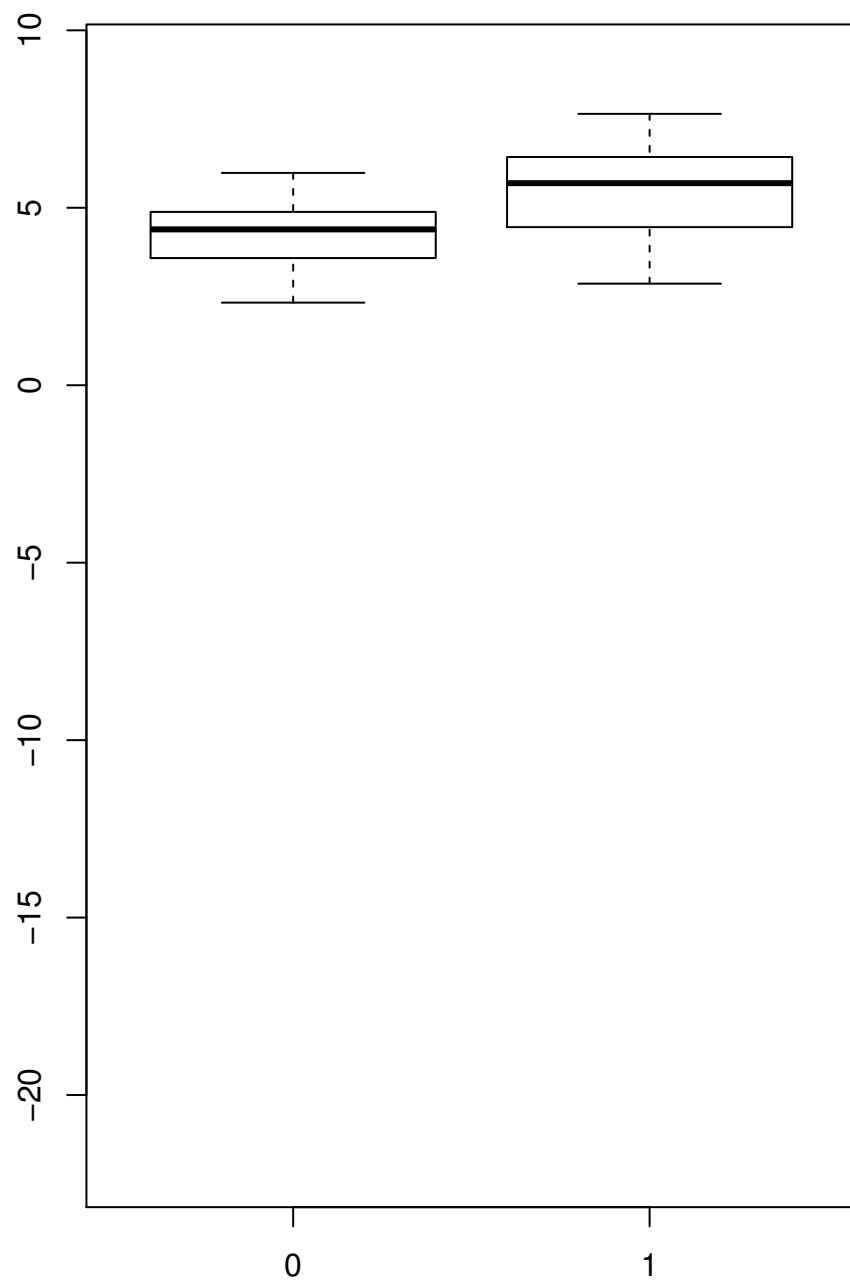

**hsa-miR-663b  
(GSE67139)**

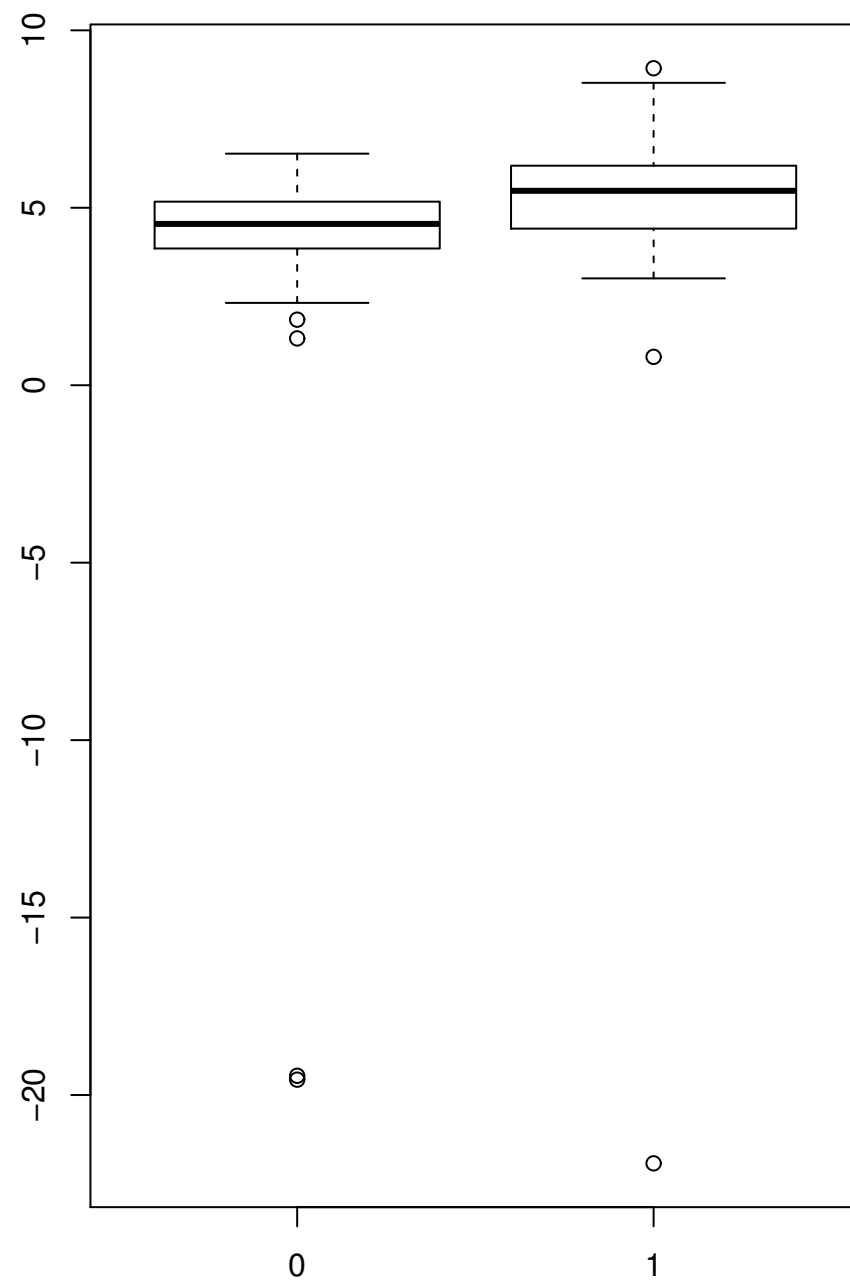

**hsa-miR-664-star  
(GSE67138)**

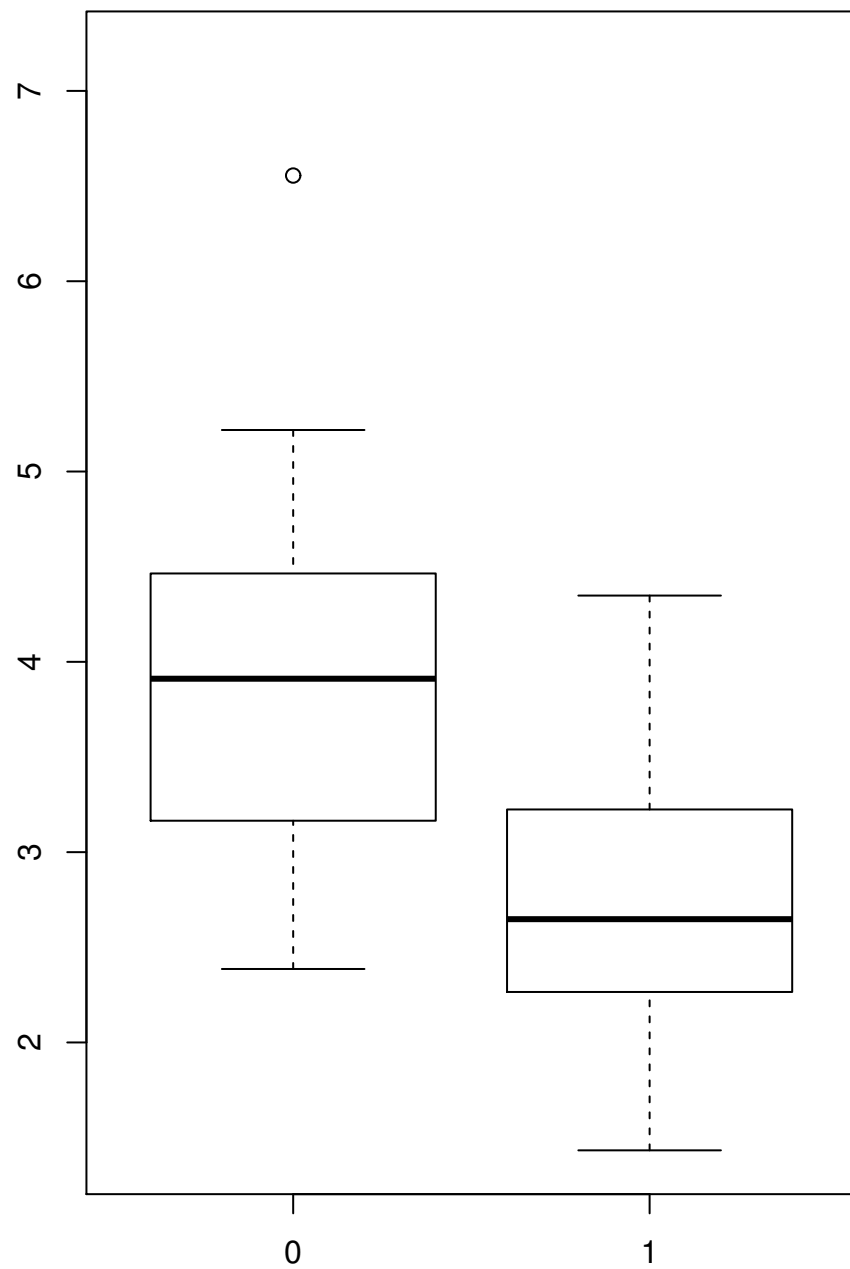

**hsa-miR-664-star  
(GSE67139)**

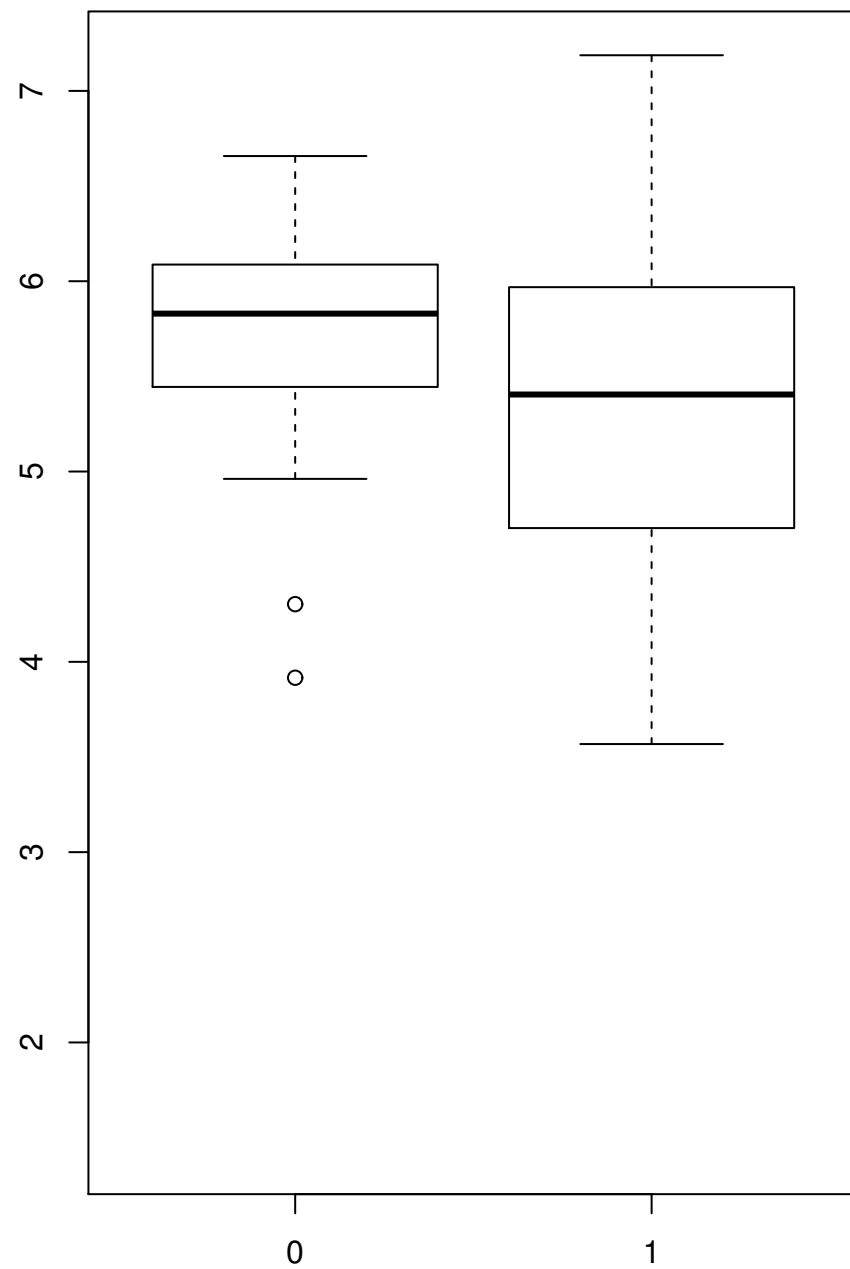

**hsa-miR-671-3p  
(GSE67138)**

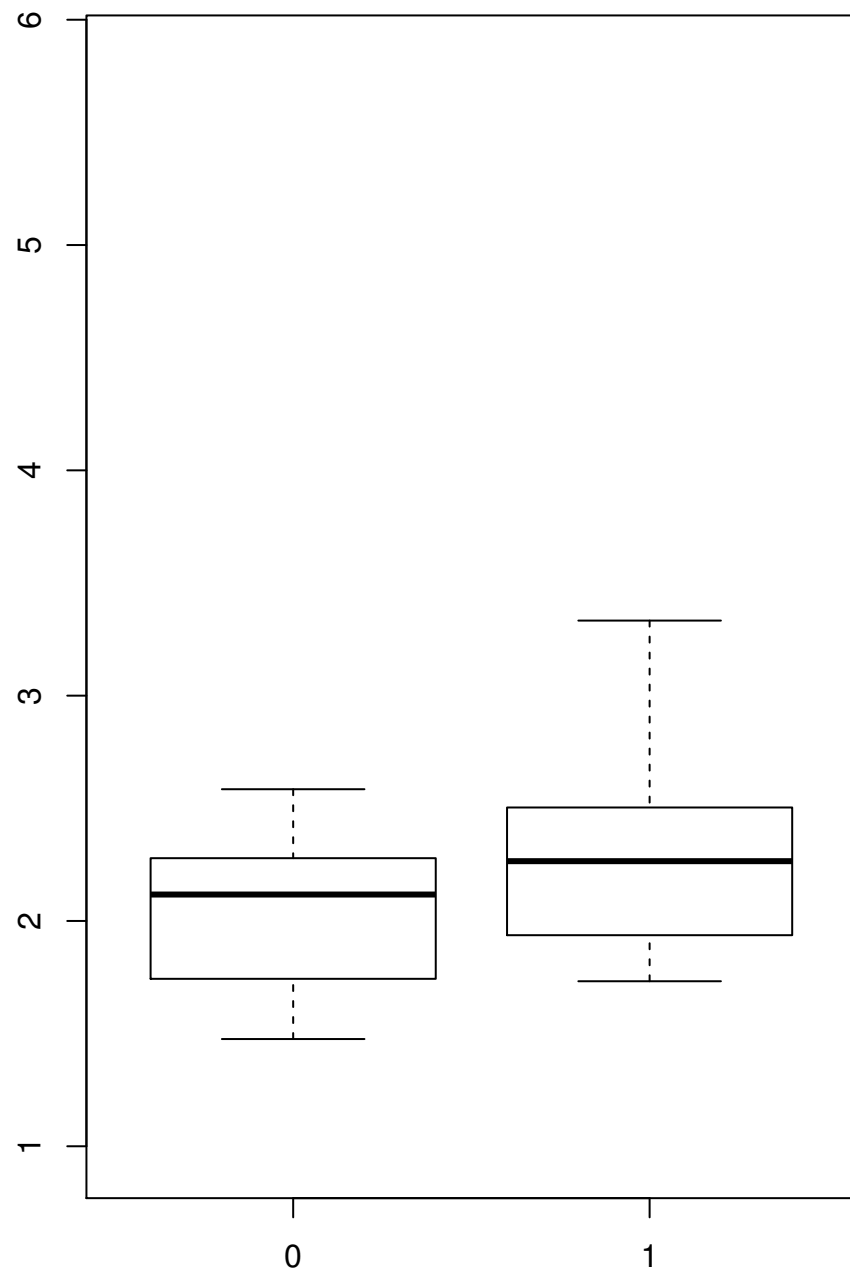

**hsa-miR-671-3p  
(GSE67139)**

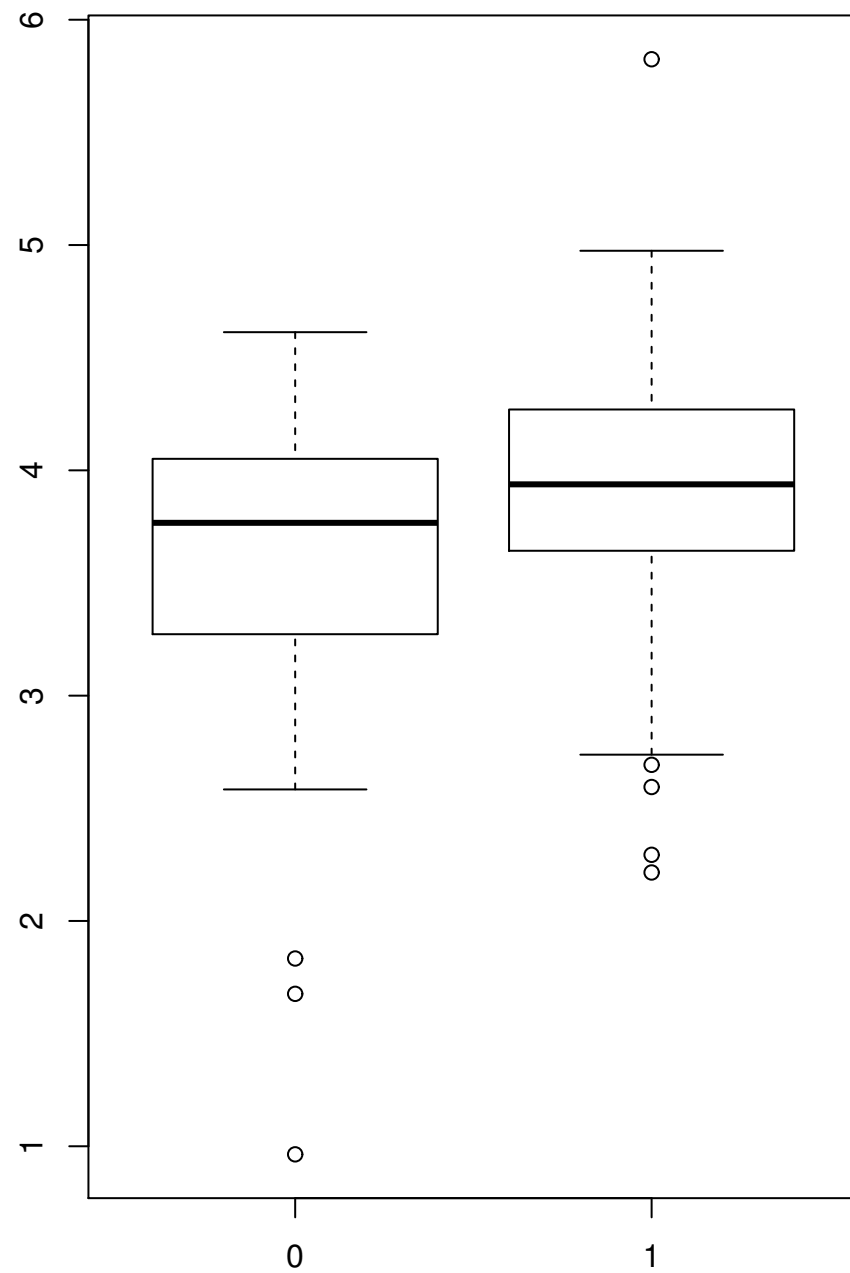

**hsa-miR-708  
(GSE67138)**

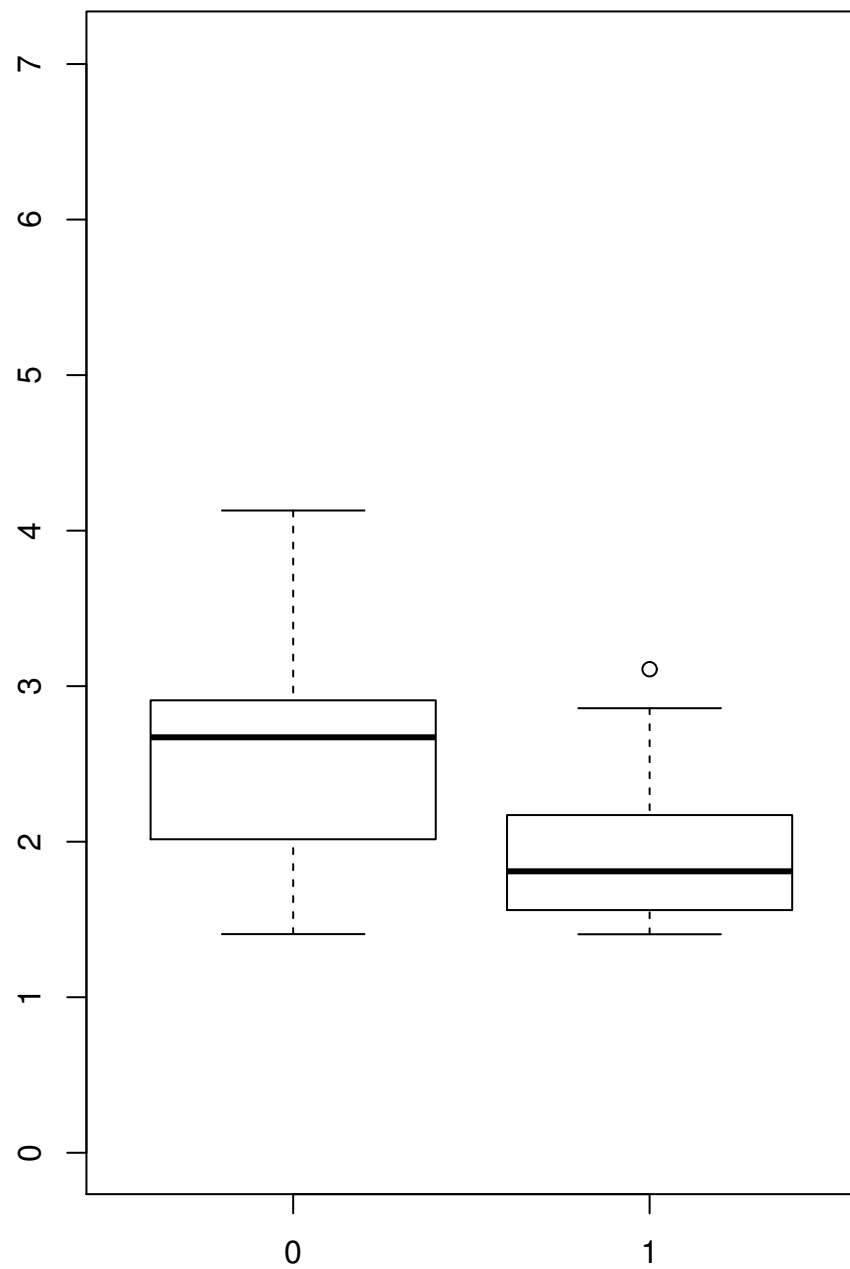

**hsa-miR-708  
(GSE67139)**

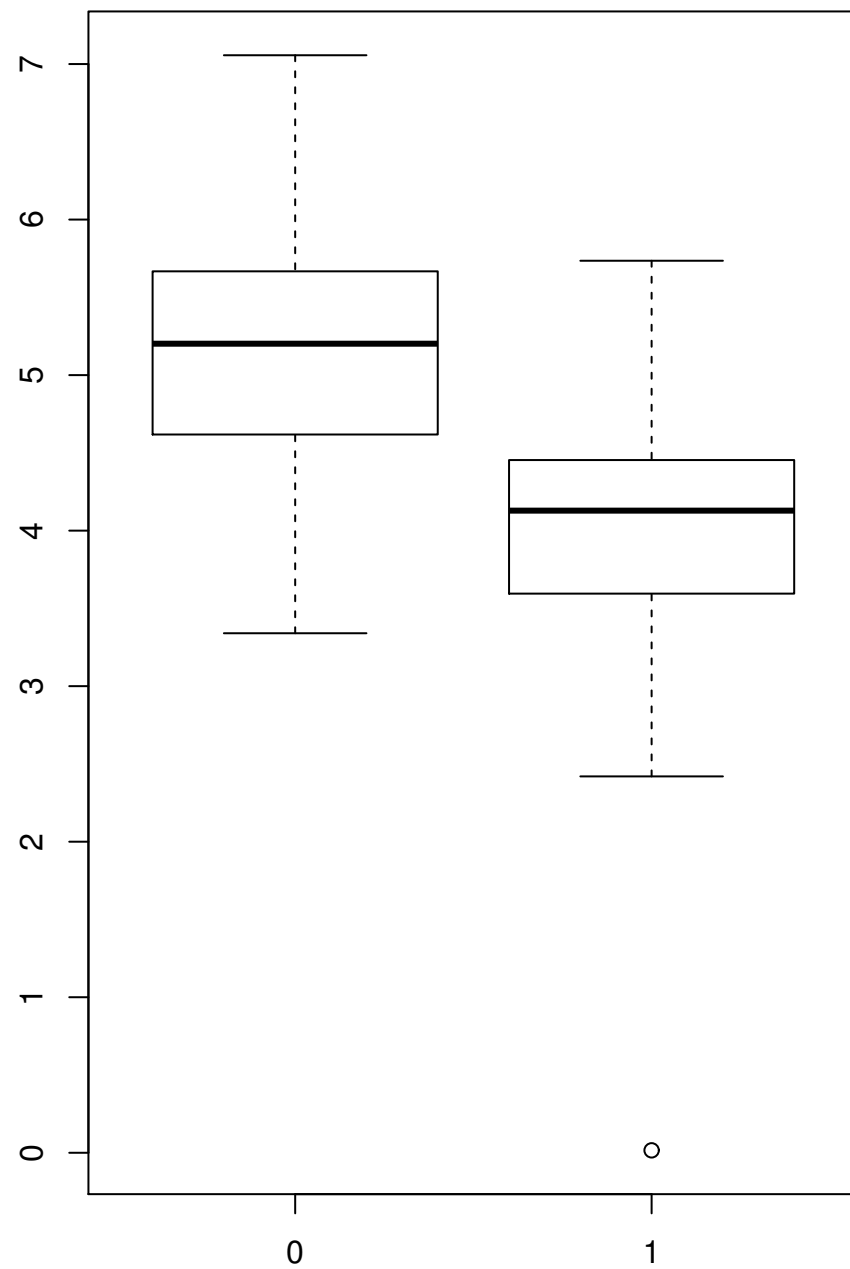

**hsa-miR-744  
(GSE67138)**

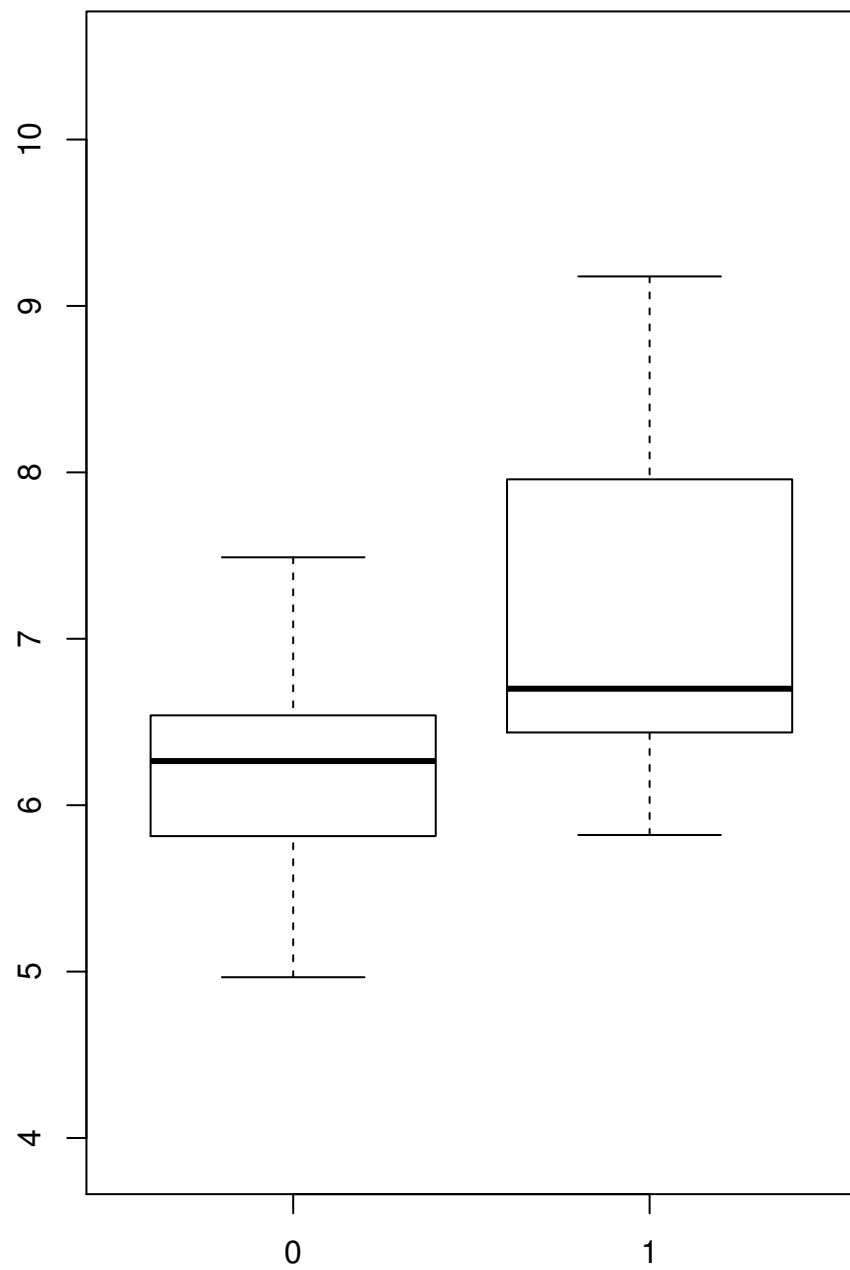

**hsa-miR-744  
(GSE67139)**

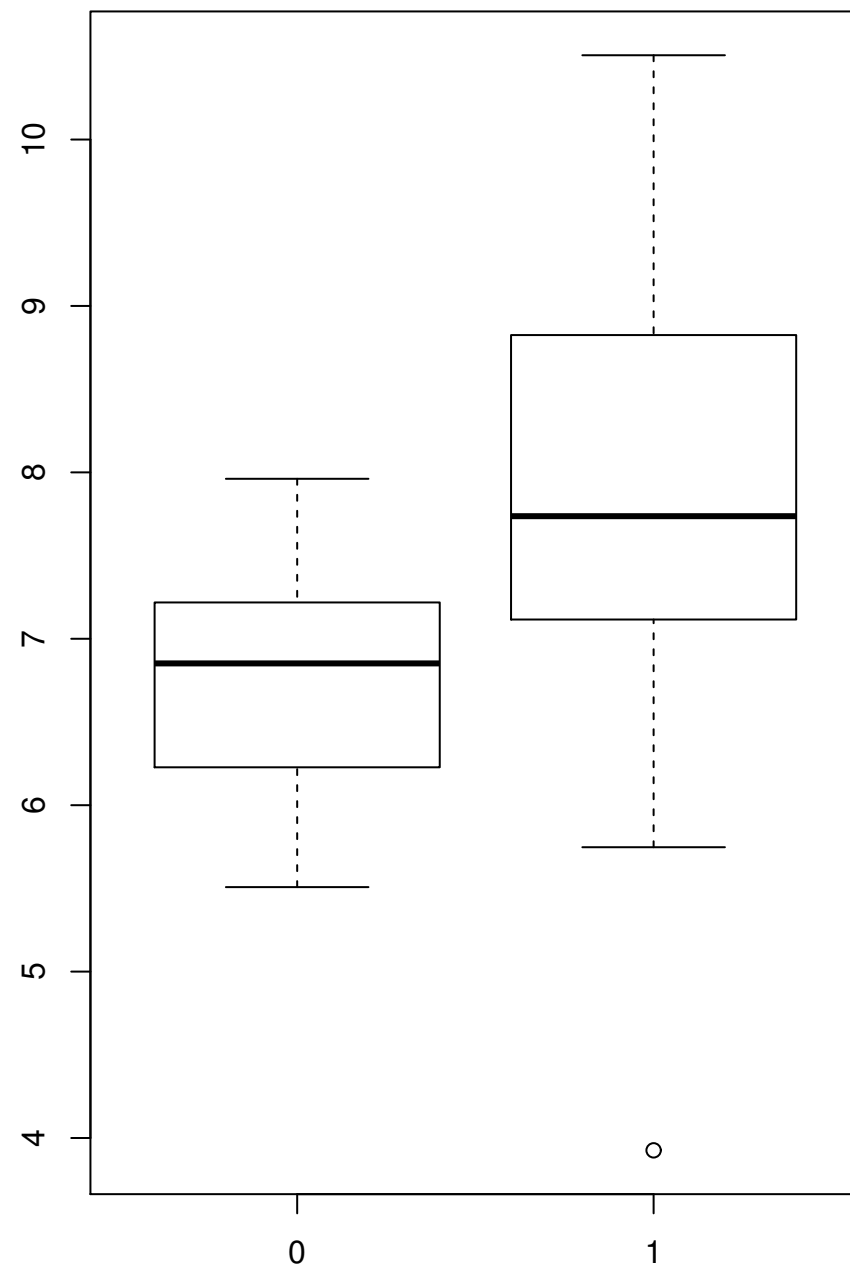

**hsa-miR-765**  
**(GSE67138)**

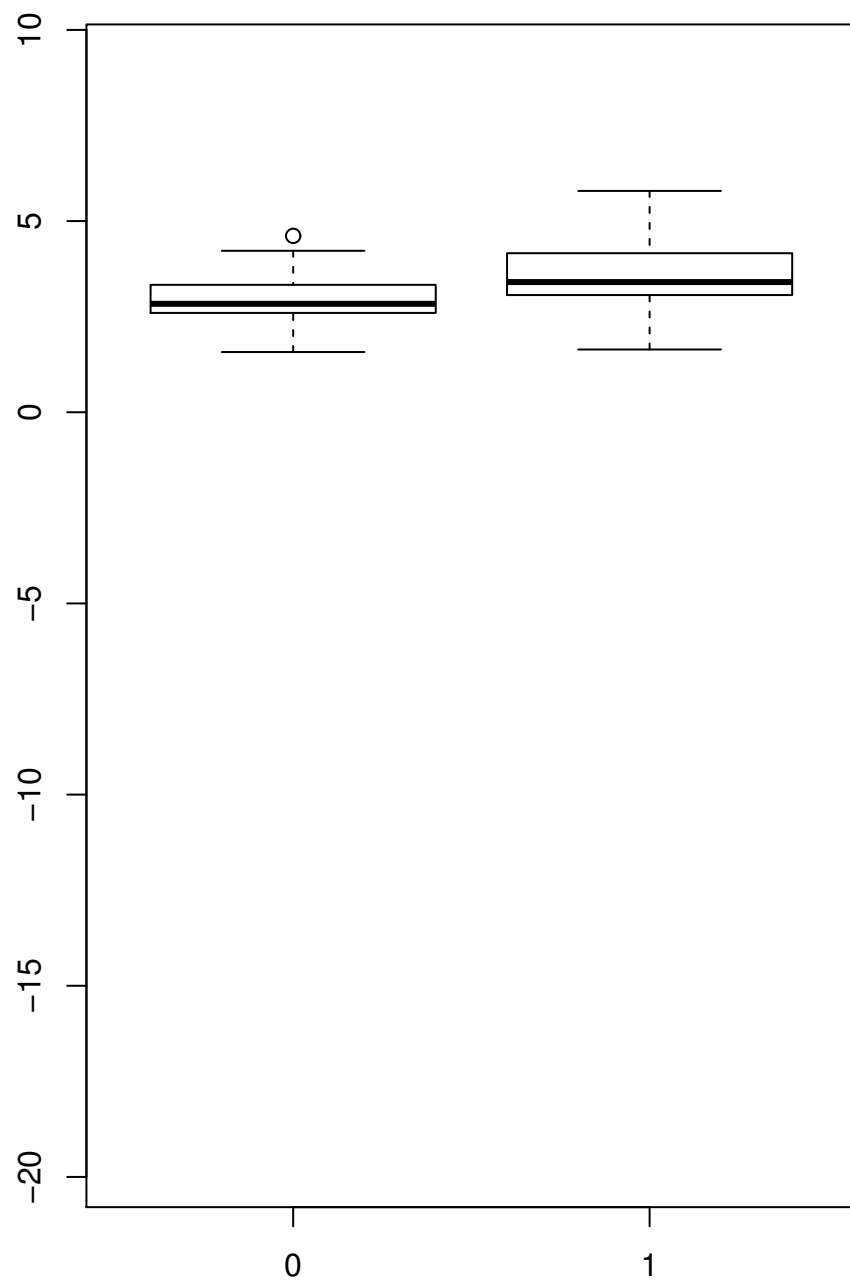

**hsa-miR-765**  
**(GSE67139)**

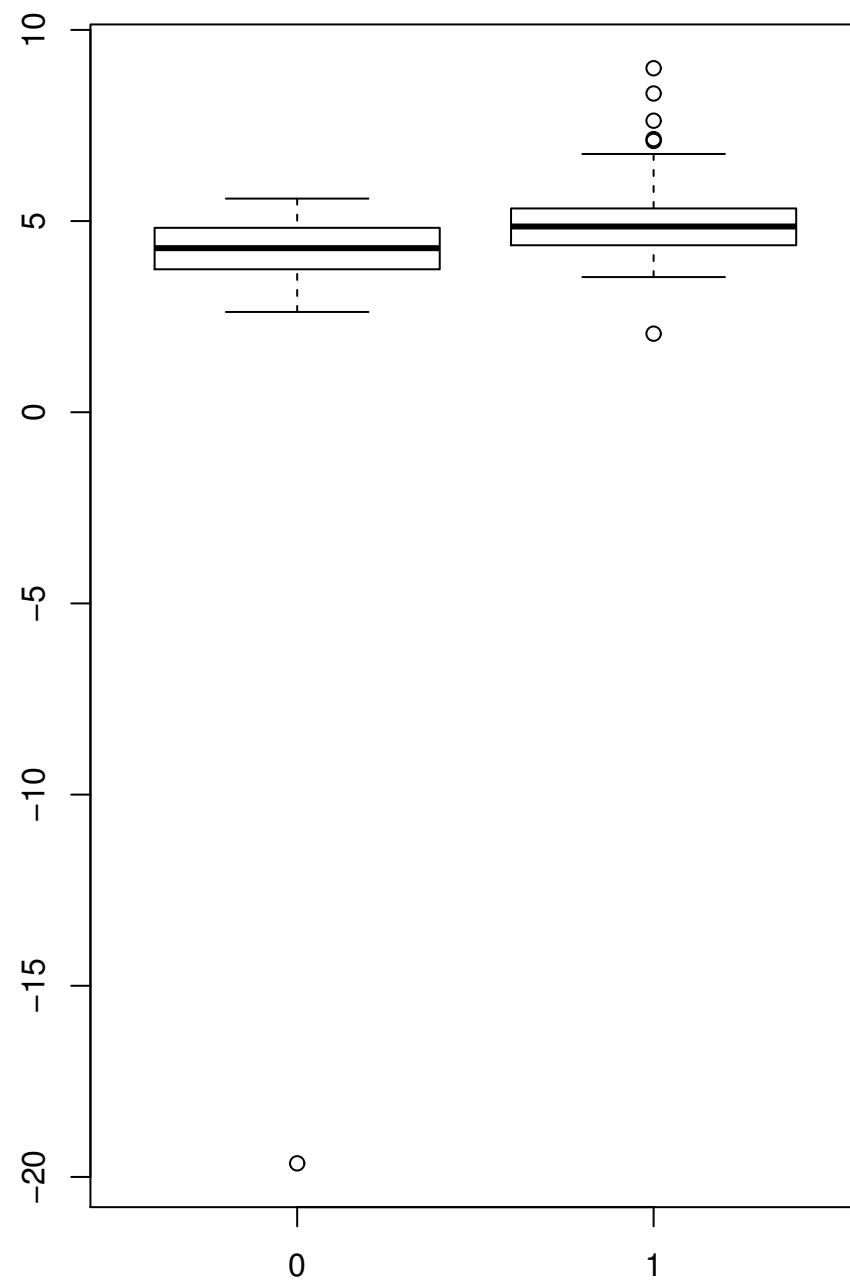



hsa-miR-768-5p  
(GSE67138)

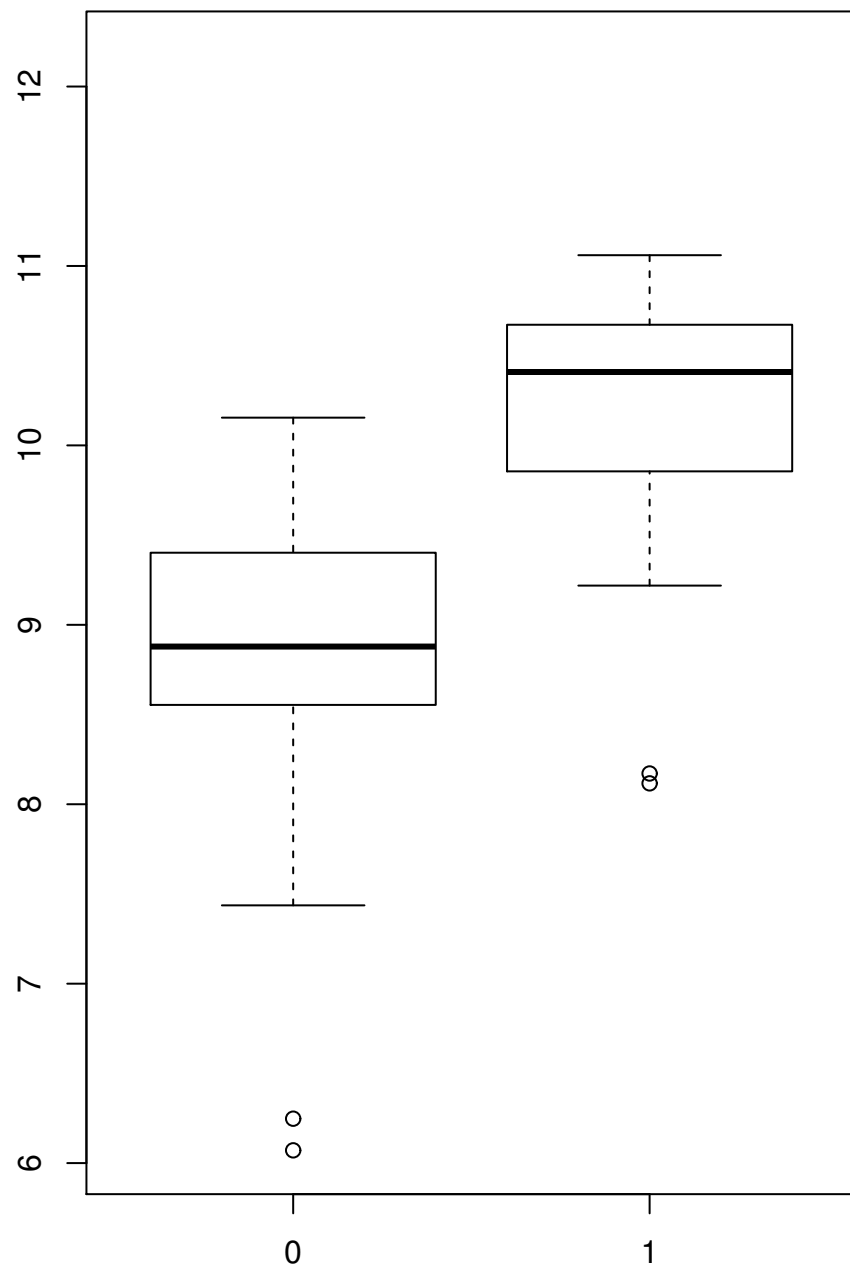

hsa-miR-768-5p  
(GSE67139)

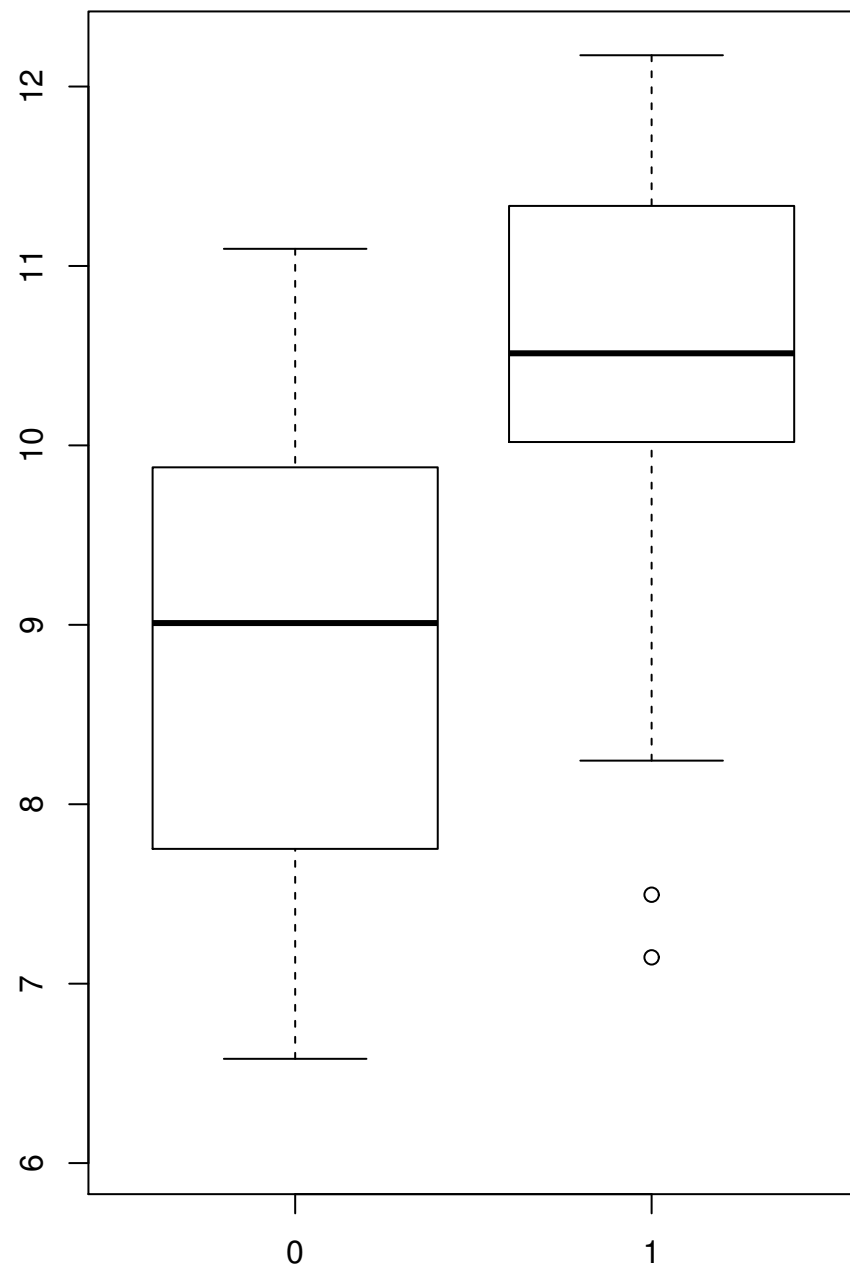

**hsa-miR-769-5p  
(GSE67138)**

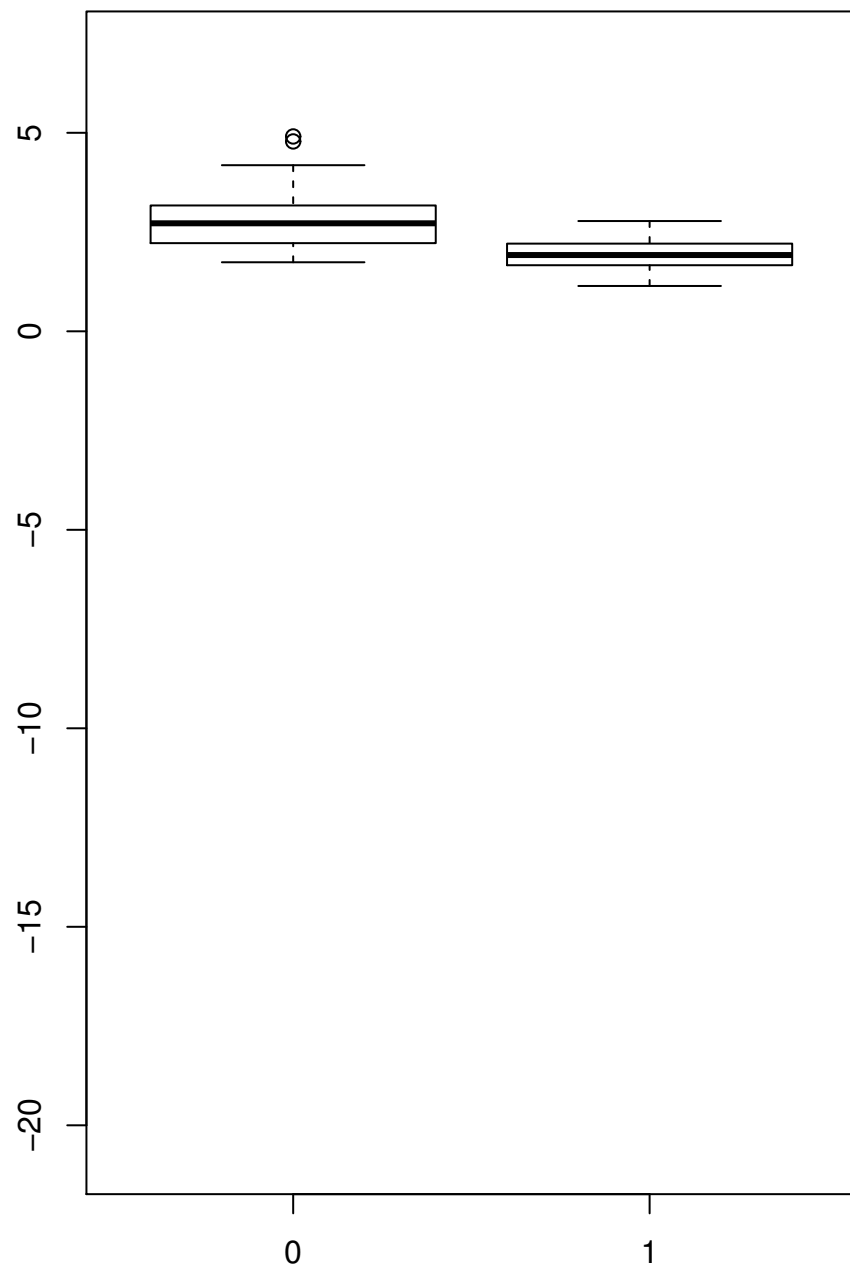

**hsa-miR-769-5p  
(GSE67139)**

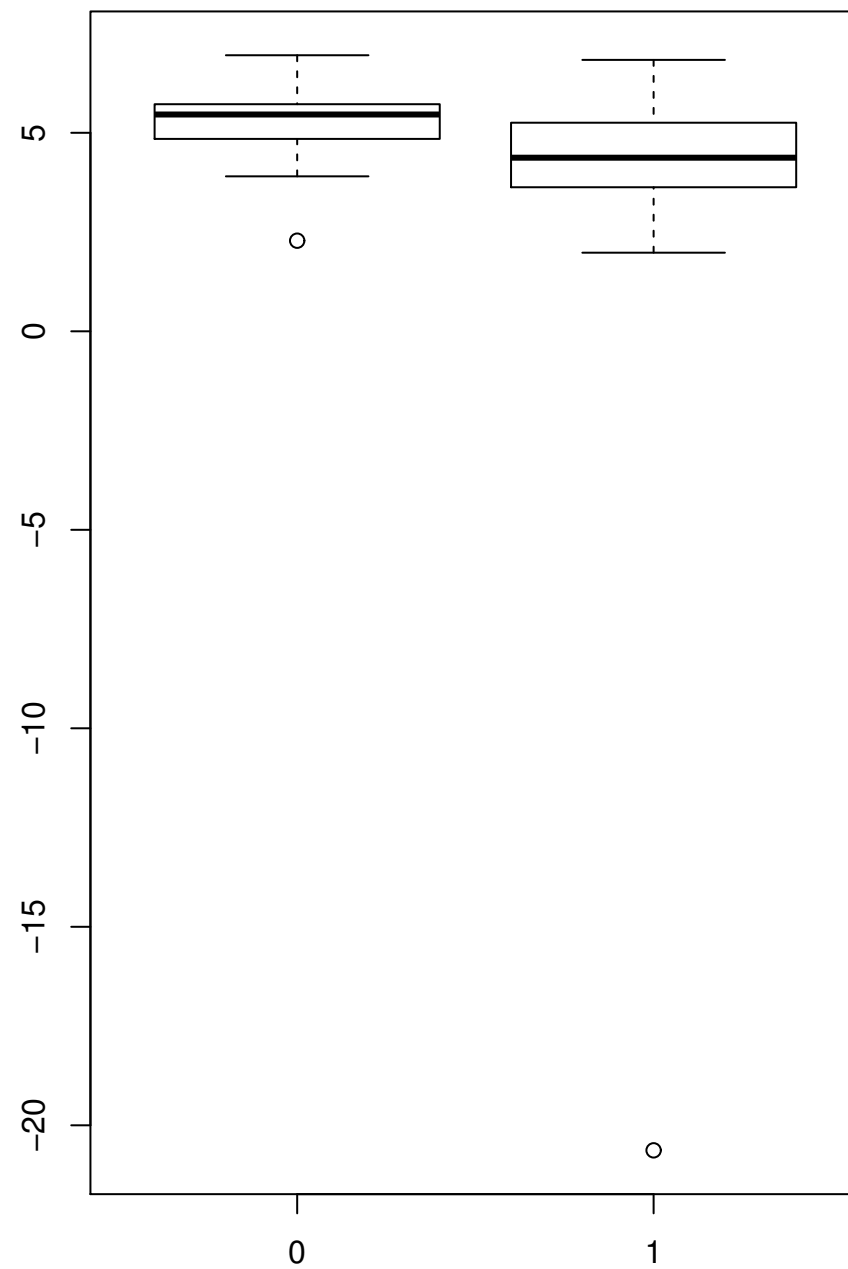

**hsa-miR-873**  
**(GSE67138)**

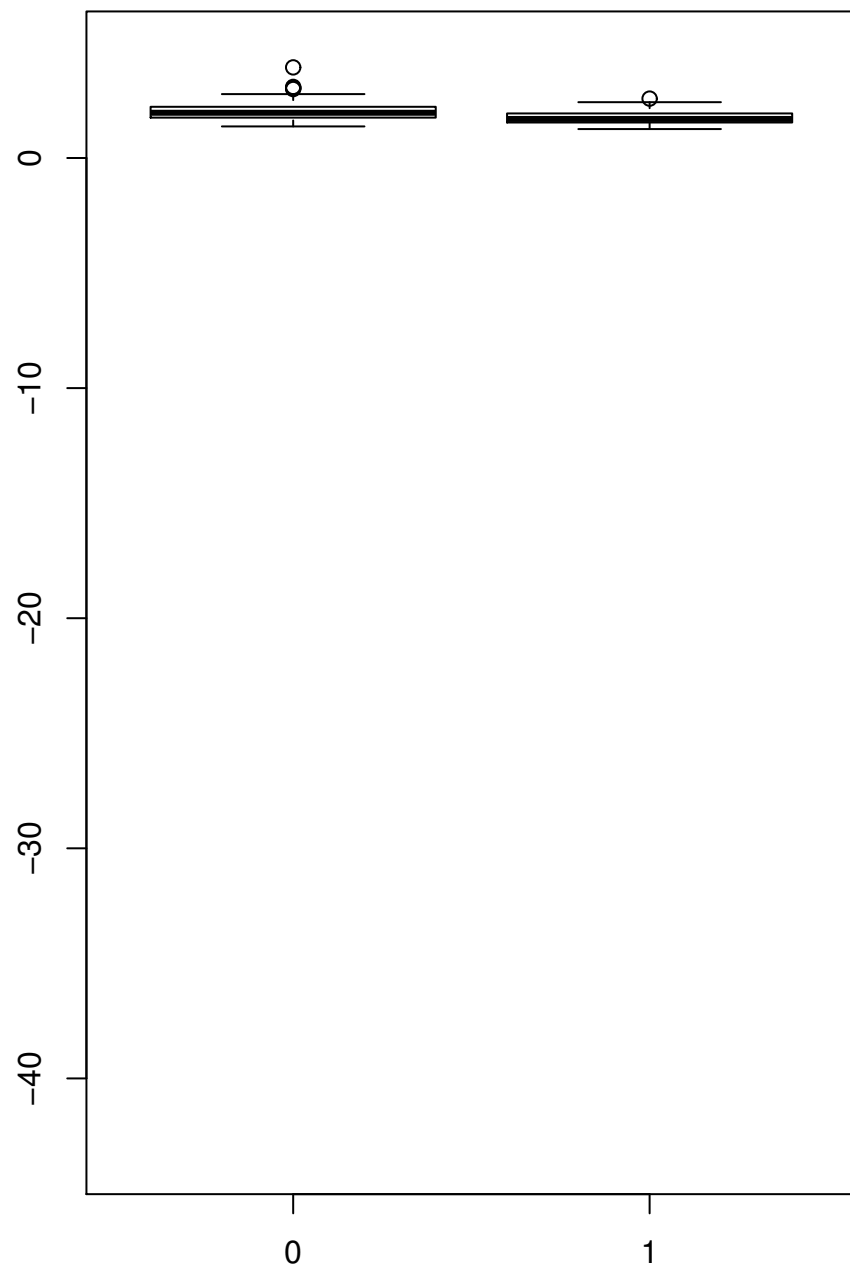

**hsa-miR-873**  
**(GSE67139)**

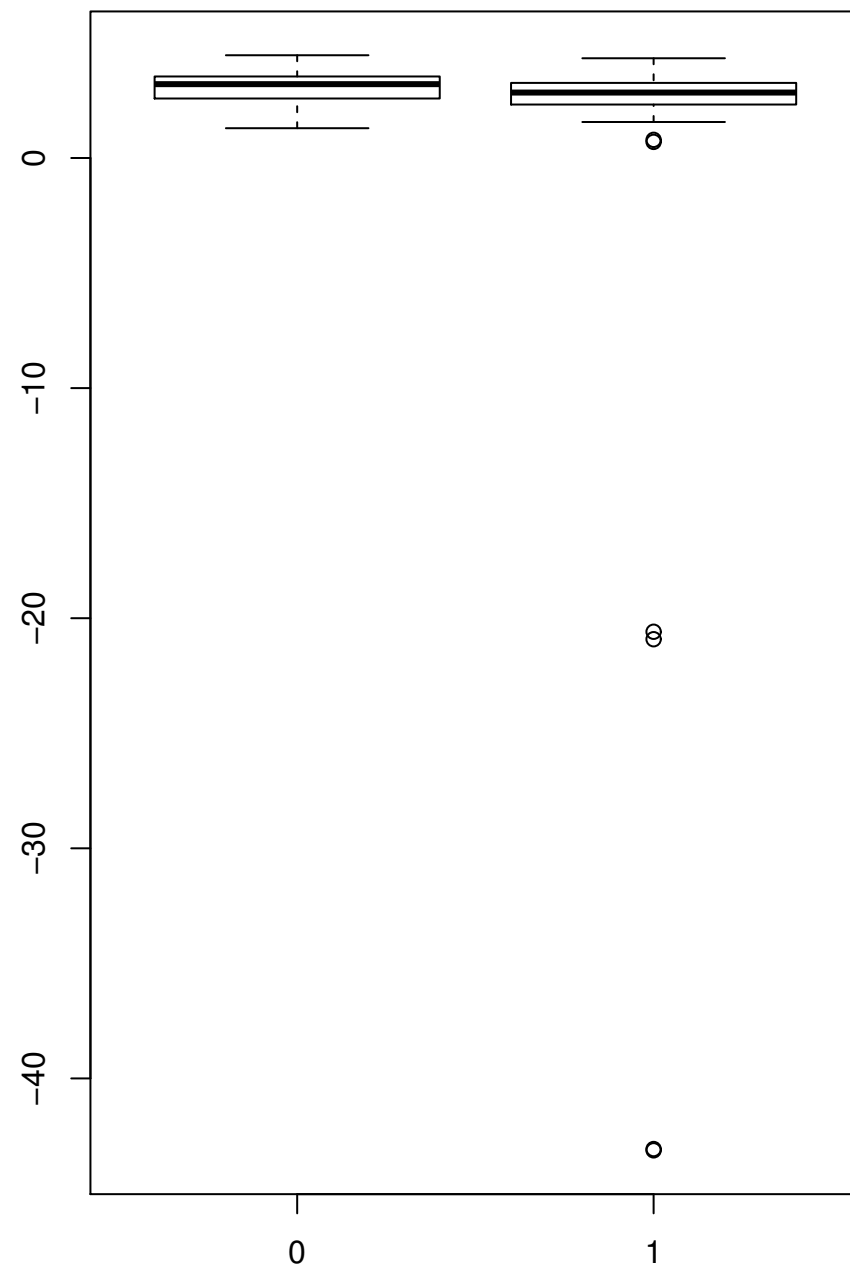

**hsa-miR-874**  
**(GSE67138)**

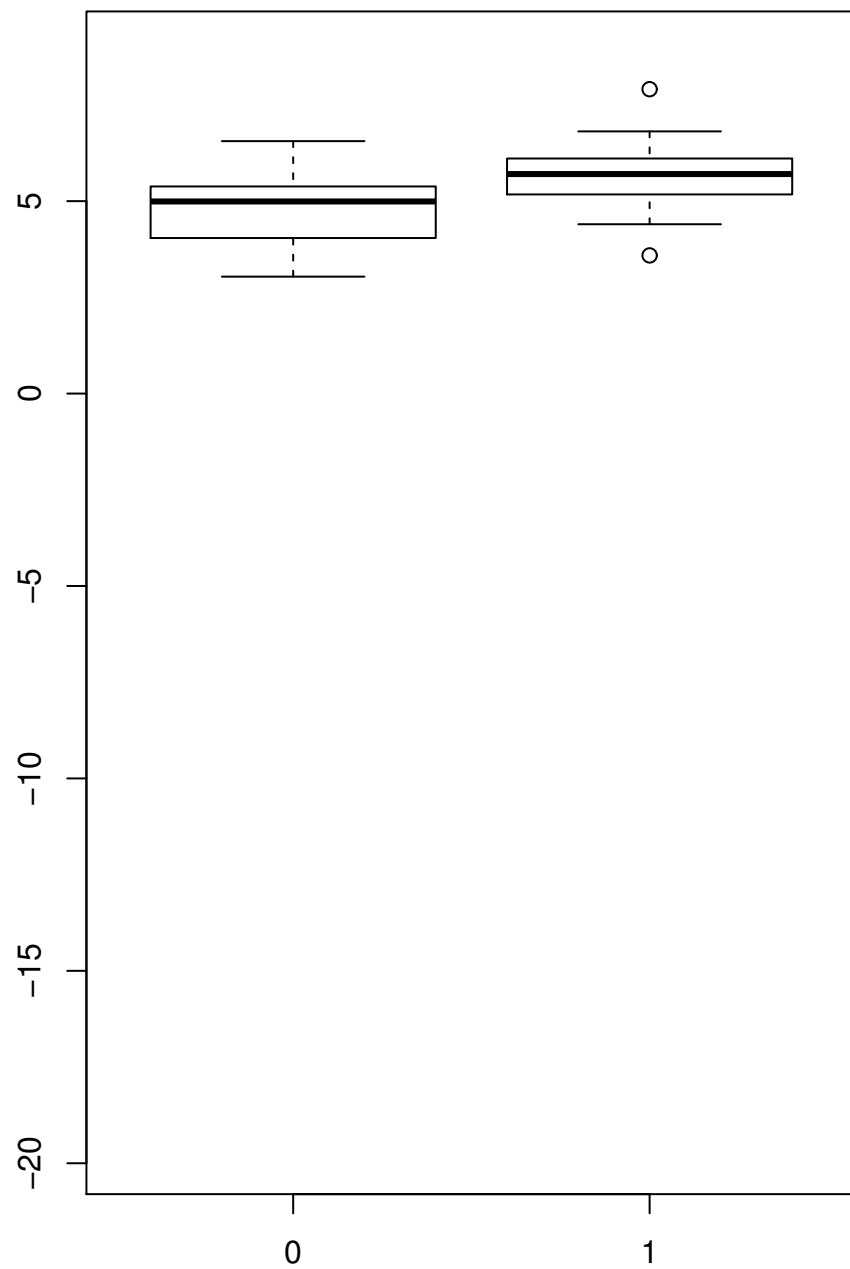

**hsa-miR-874**  
**(GSE67139)**

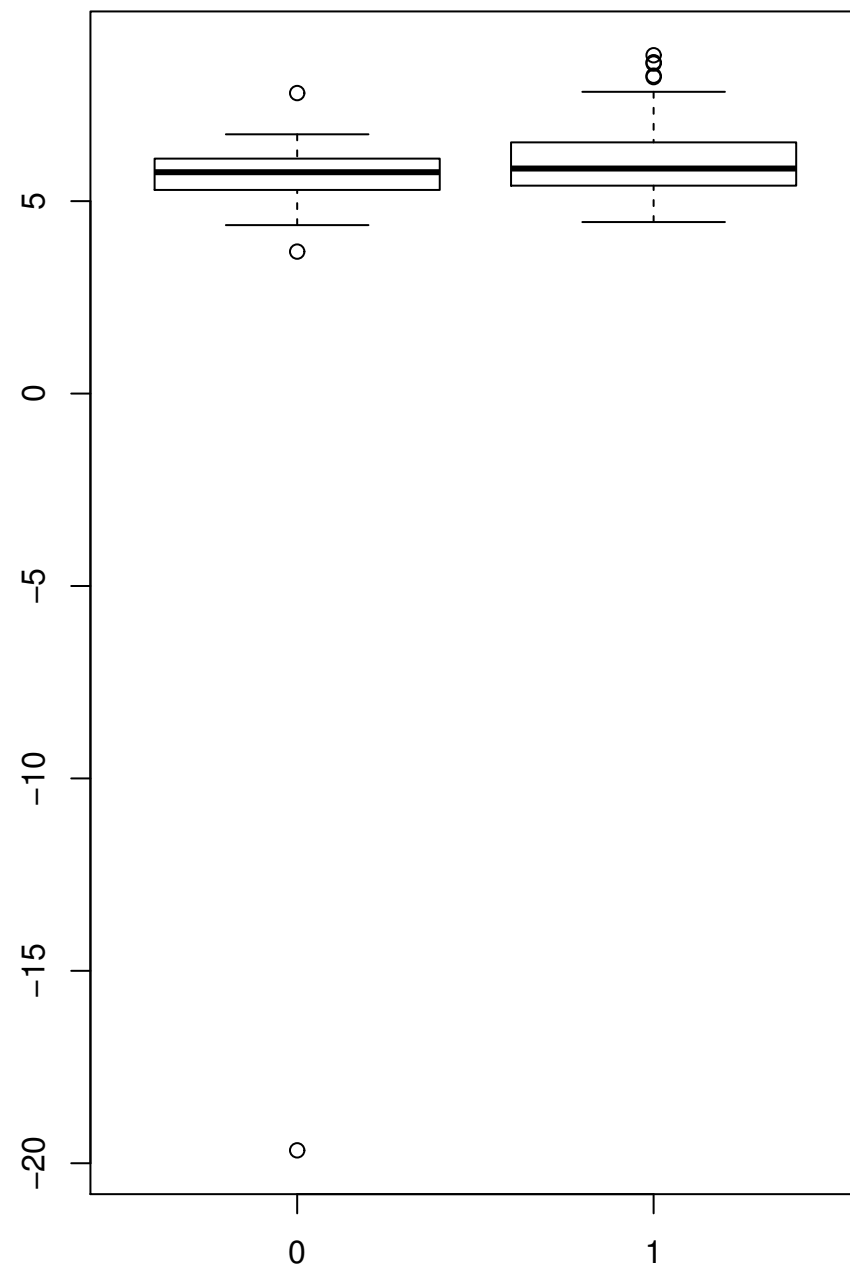

**hsa-miR-877**  
**(GSE67138)**

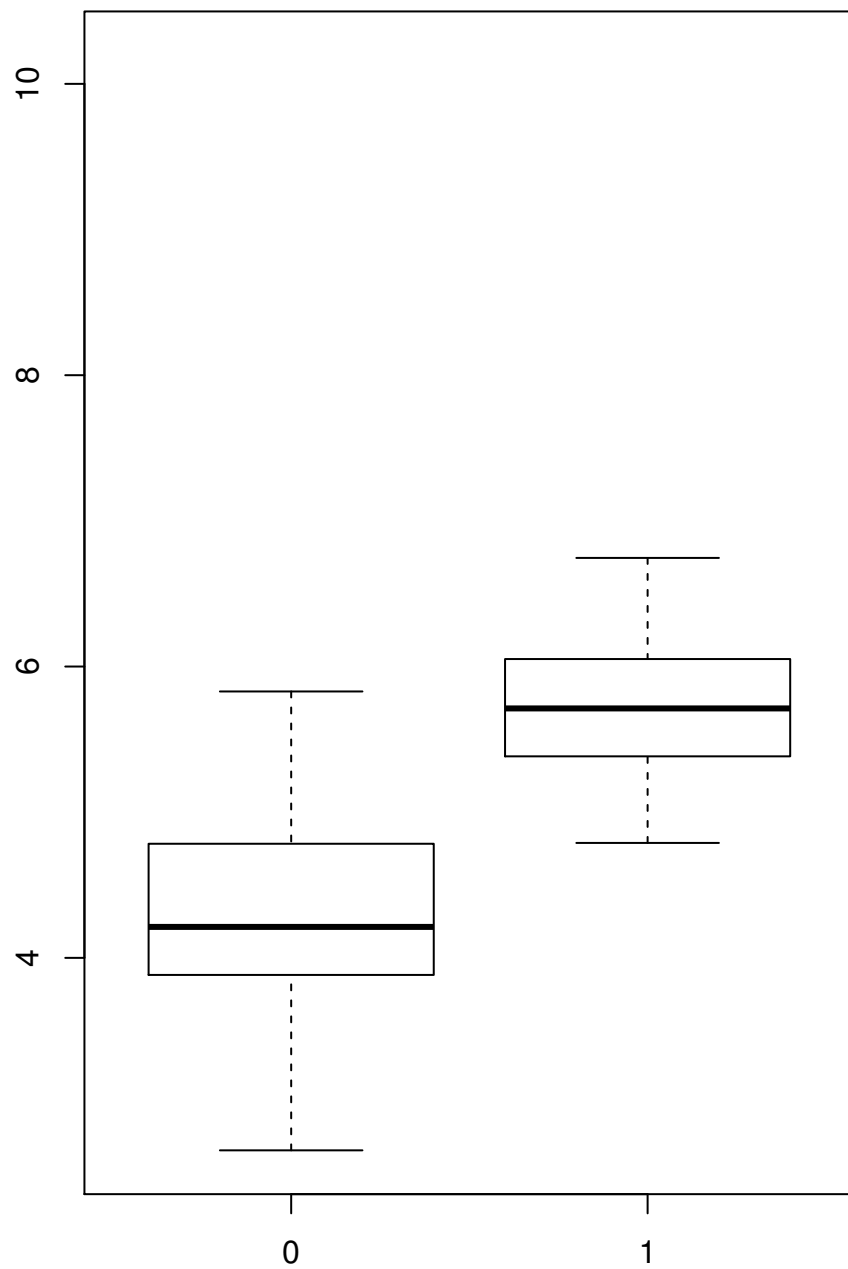

**hsa-miR-877**  
**(GSE67139)**

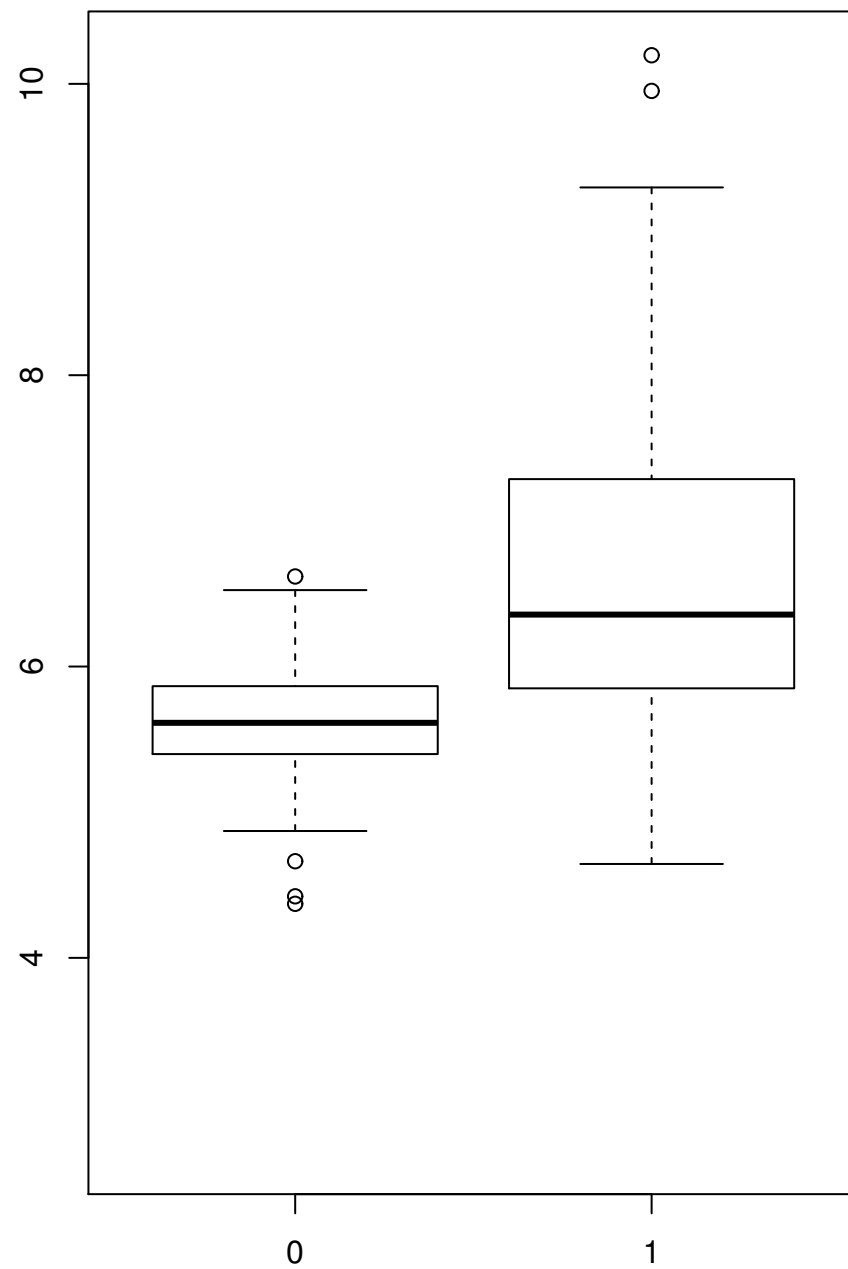

**hsa-miR-921  
(GSE67138)**

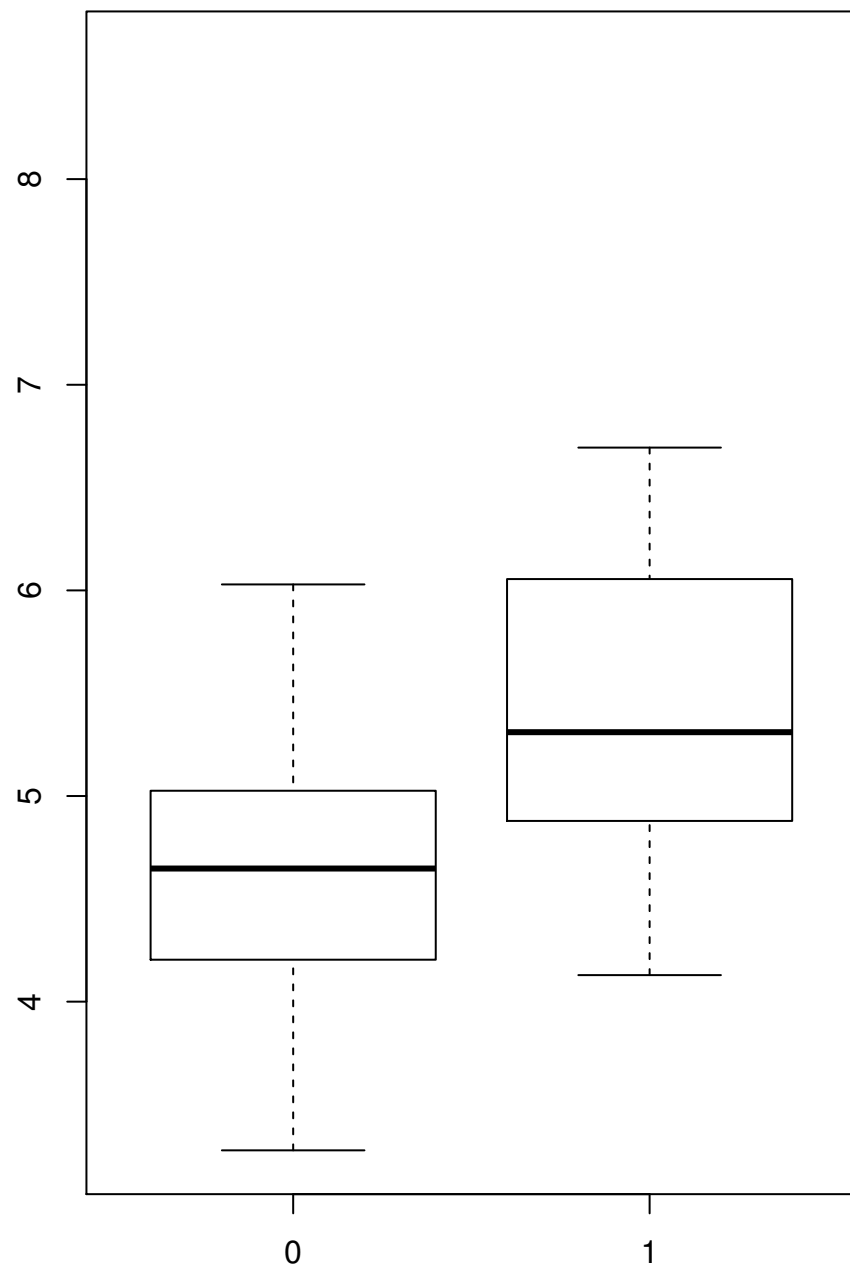

**hsa-miR-921  
(GSE67139)**

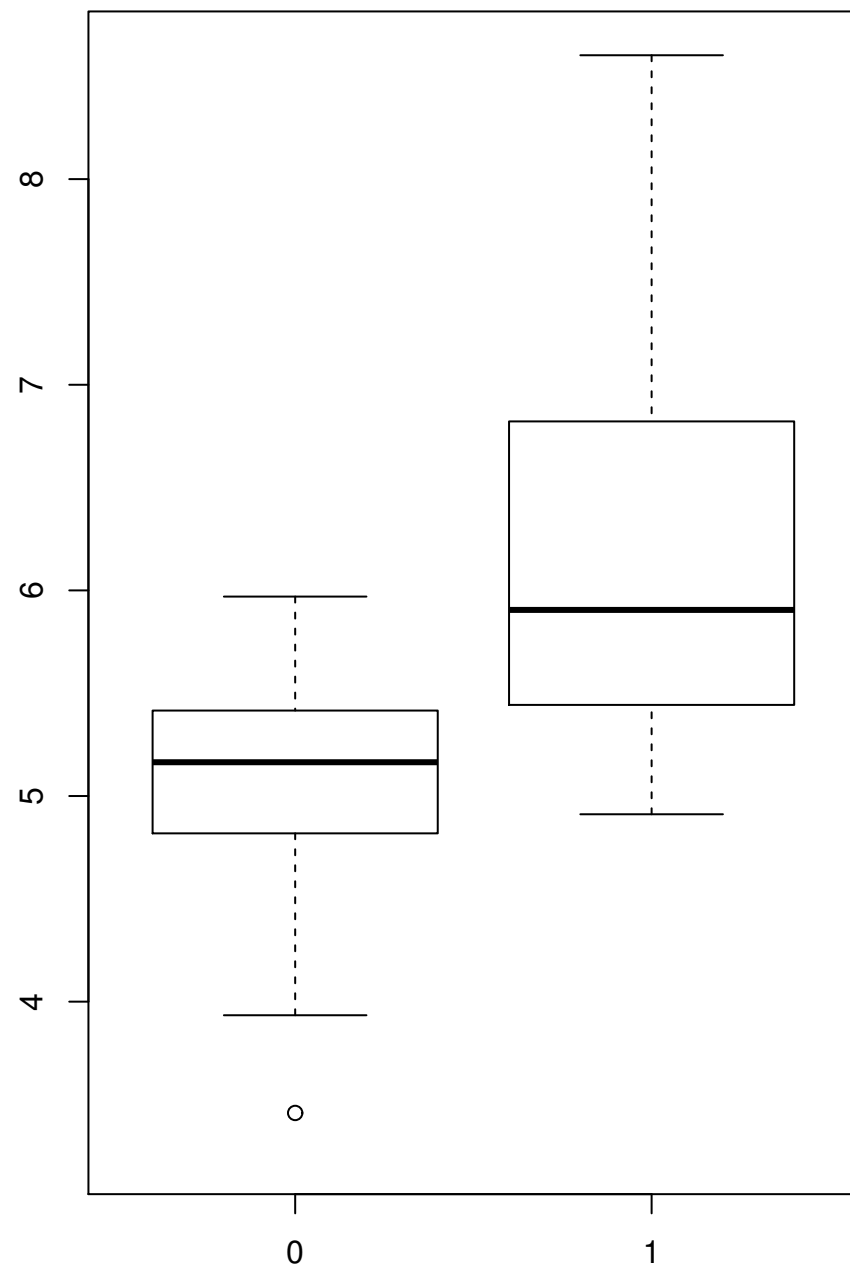

**hsa-miR-92a-1-star  
(GSE67138)**

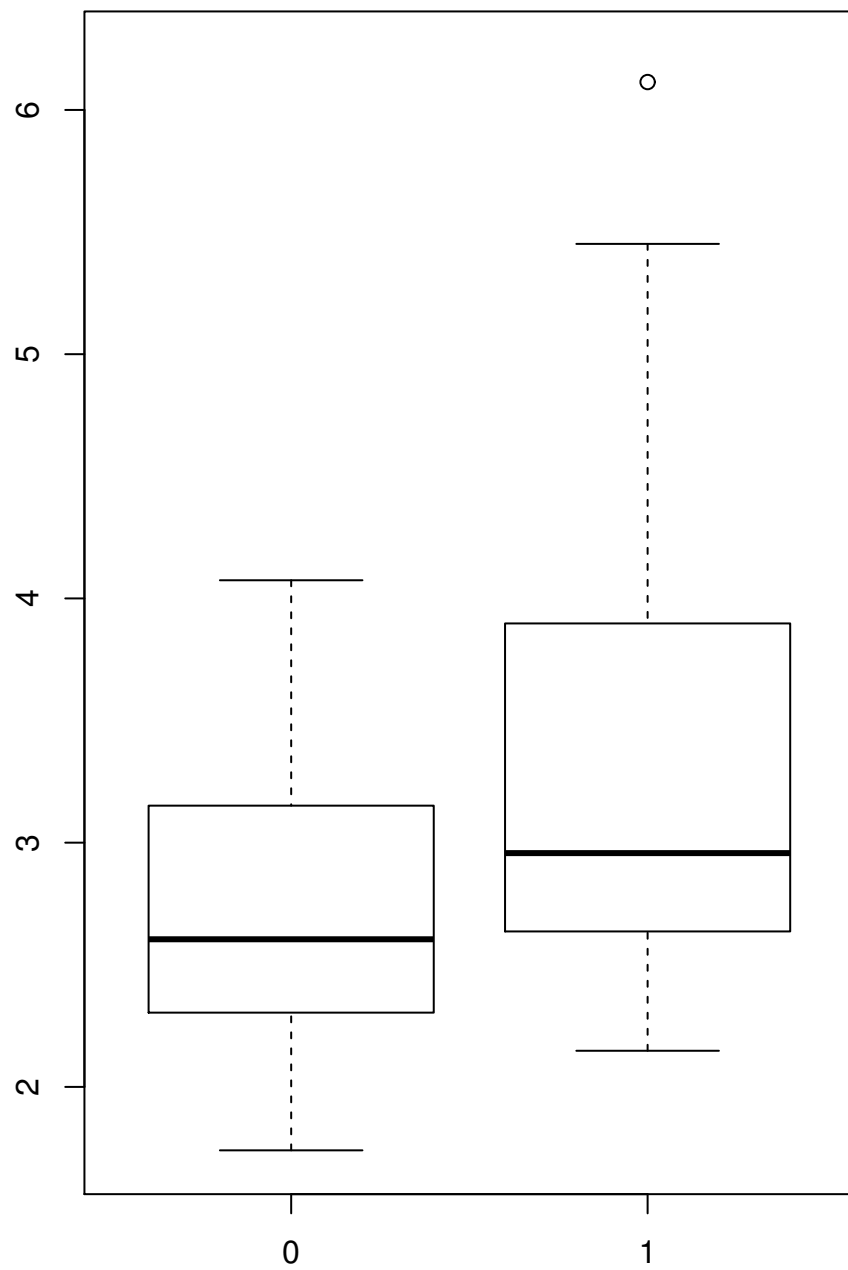

**hsa-miR-92a-1-star  
(GSE67139)**

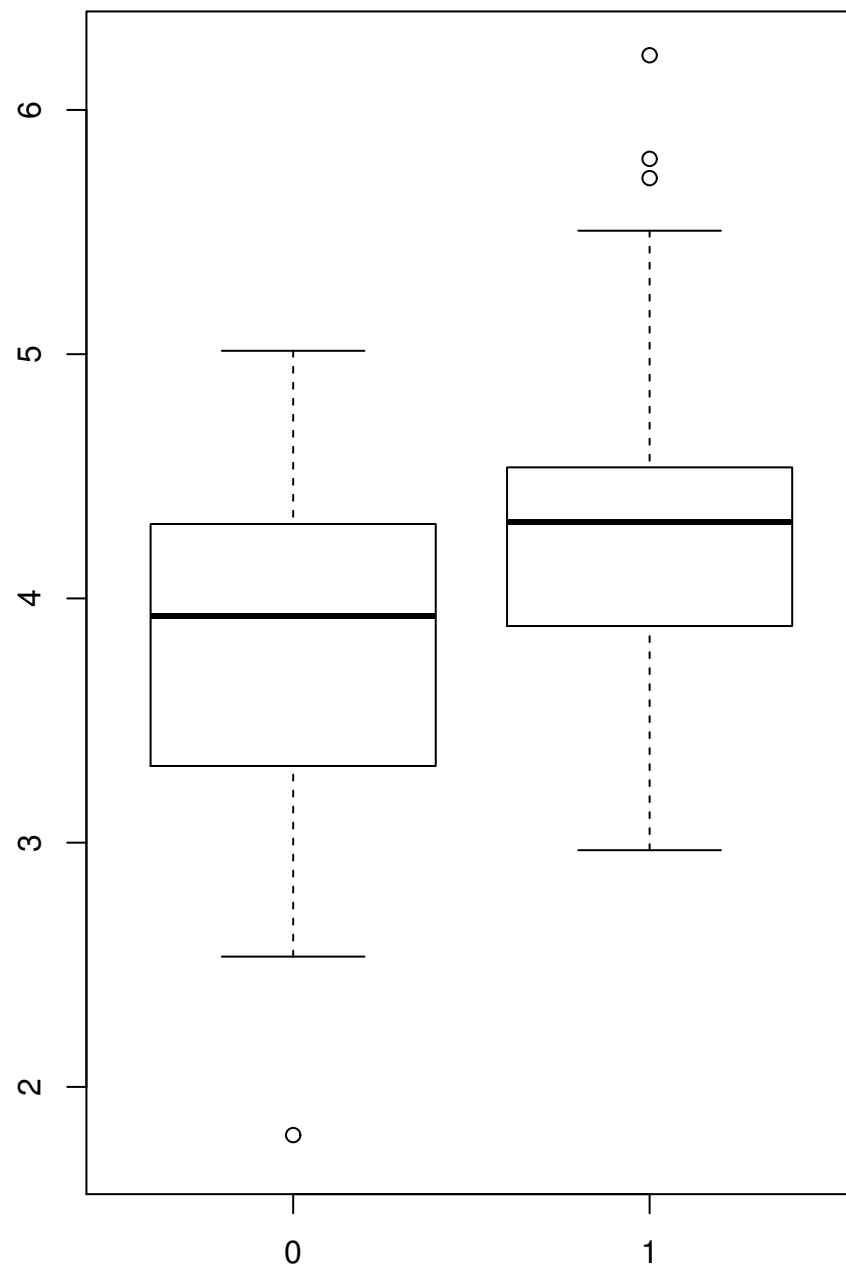

**hsa-miR-92a-2-star  
(GSE67138)**

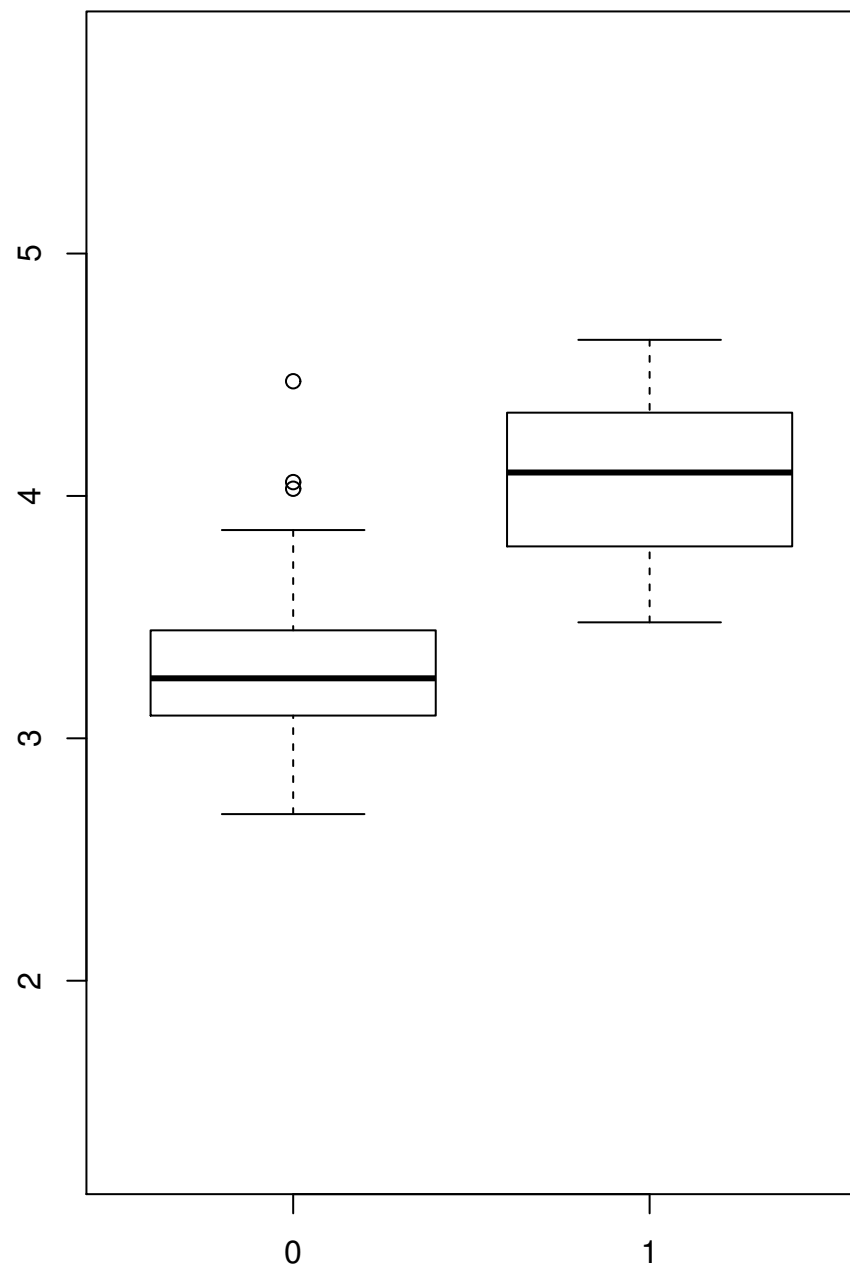

**hsa-miR-92a-2-star  
(GSE67139)**

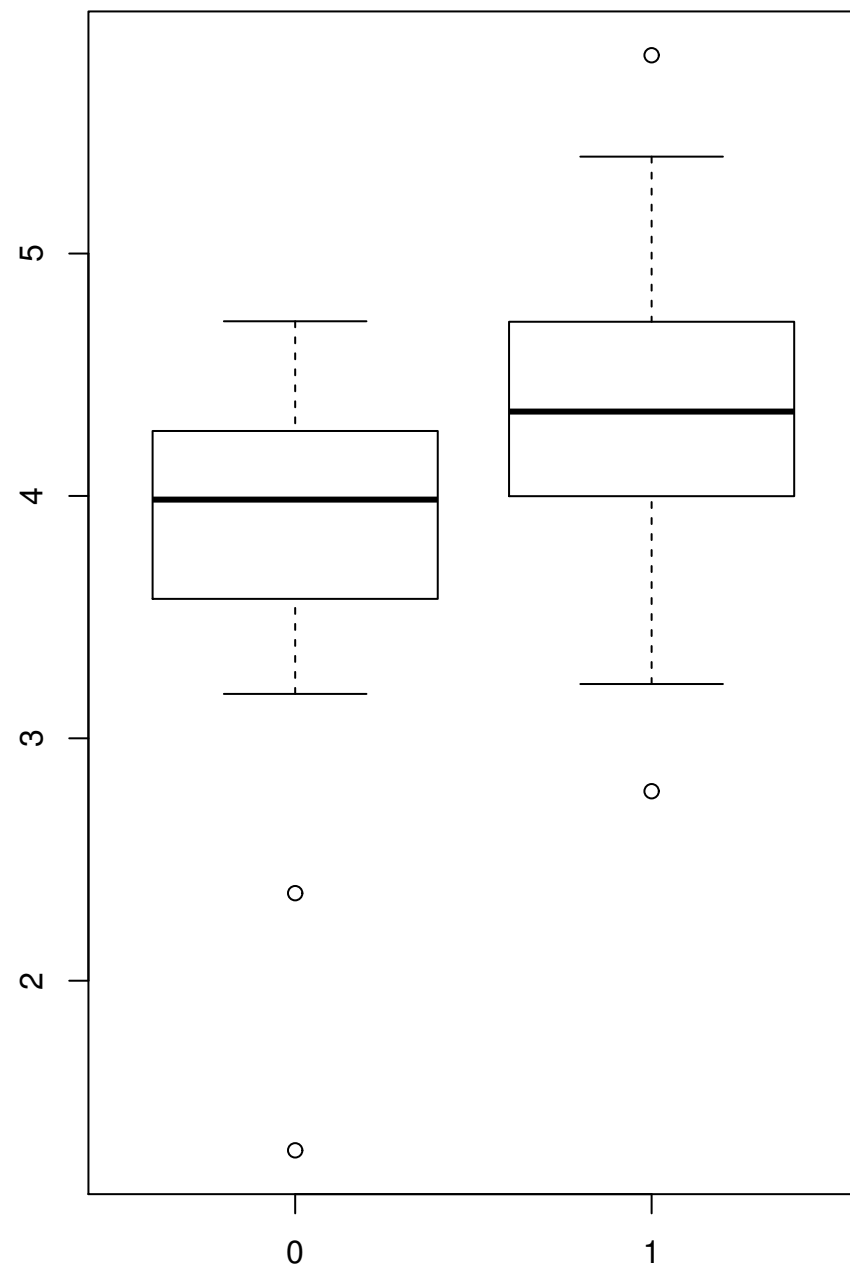



**hsa-miR-92b-star  
(GSE67138)**

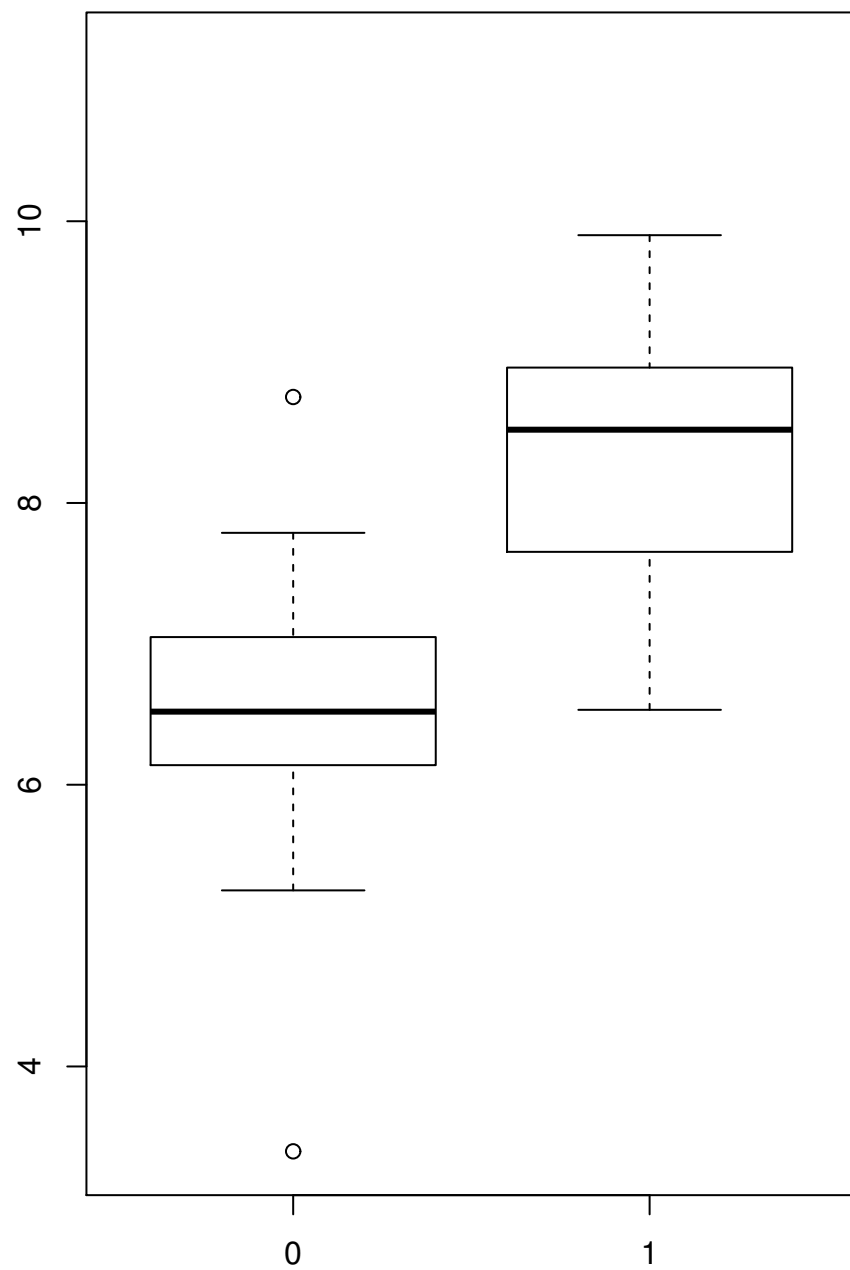

**hsa-miR-92b-star  
(GSE67139)**

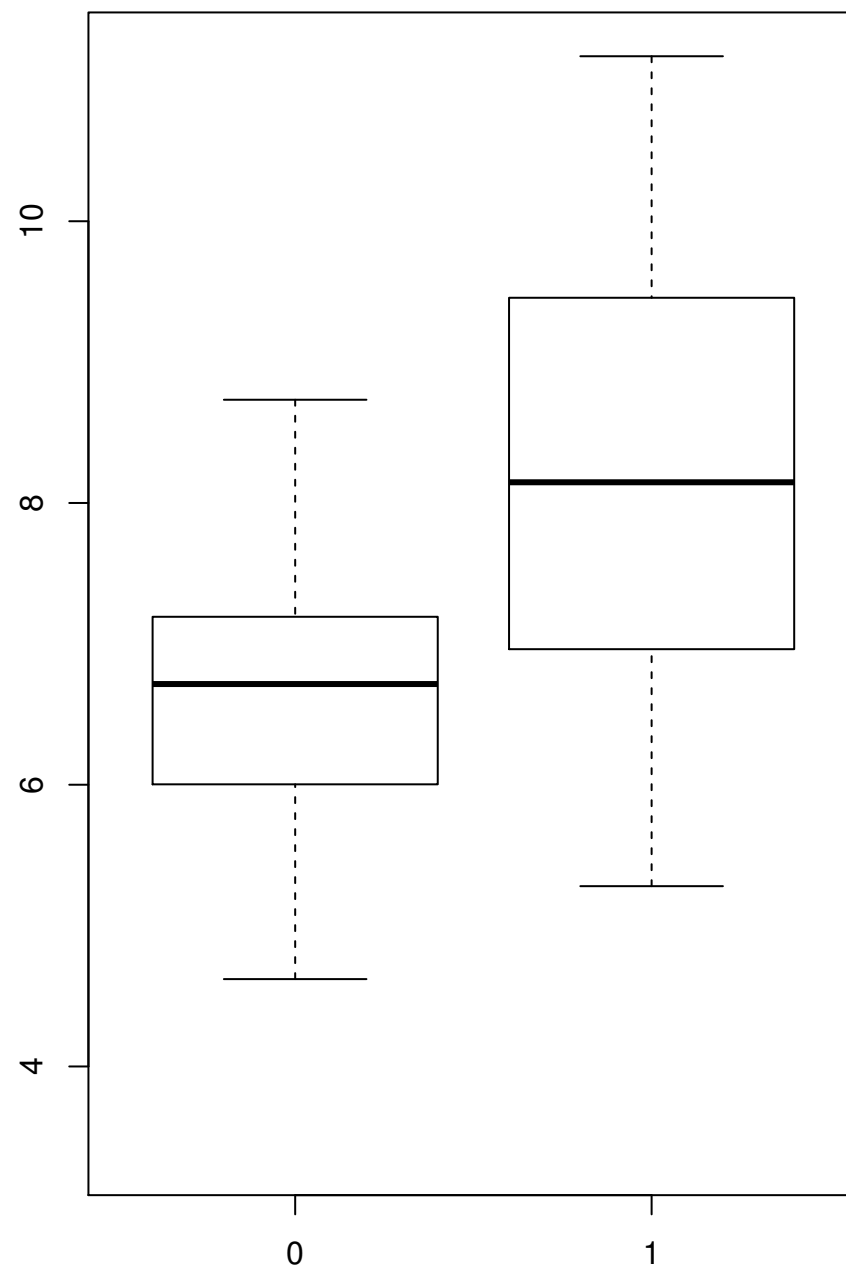

**hsa-miR-93-star**  
**(GSE67138)**

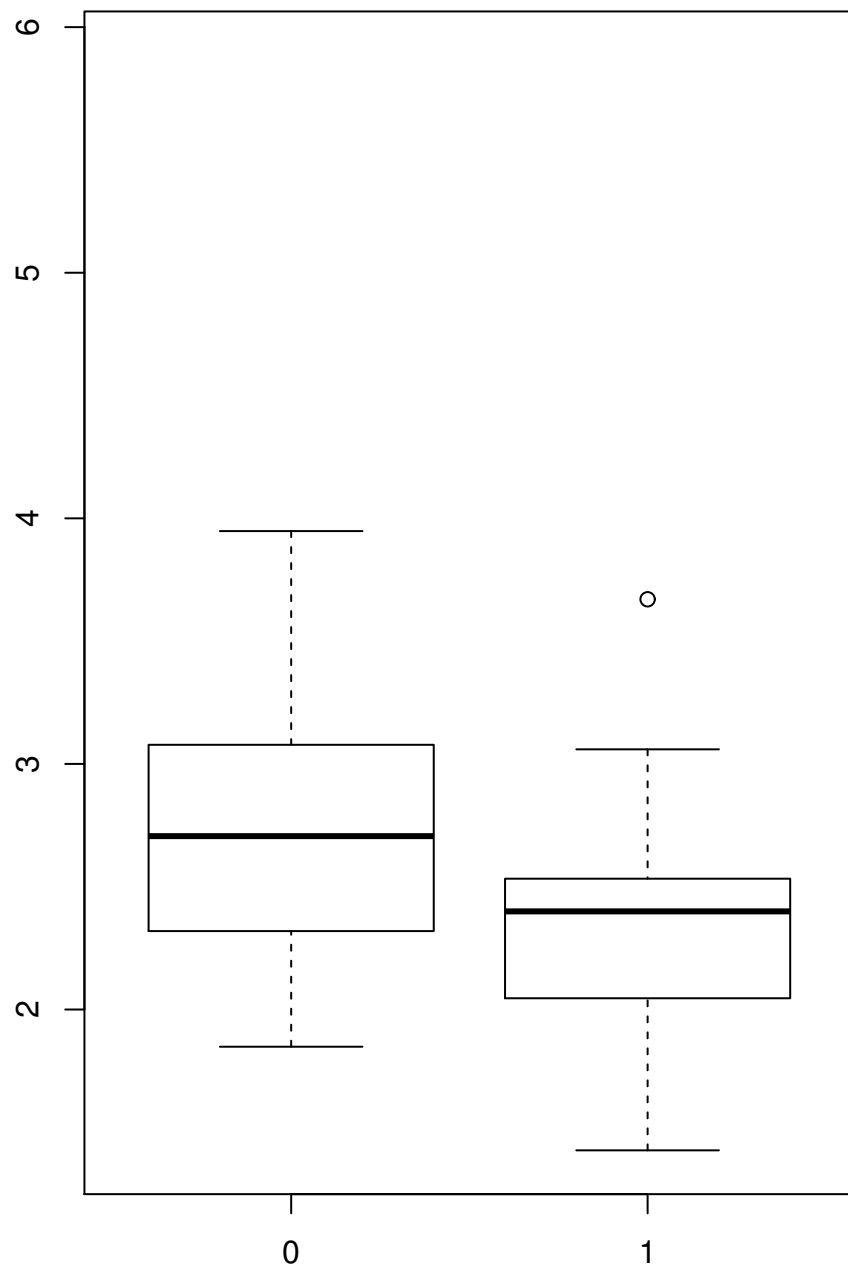

**hsa-miR-93-star**  
**(GSE67139)**

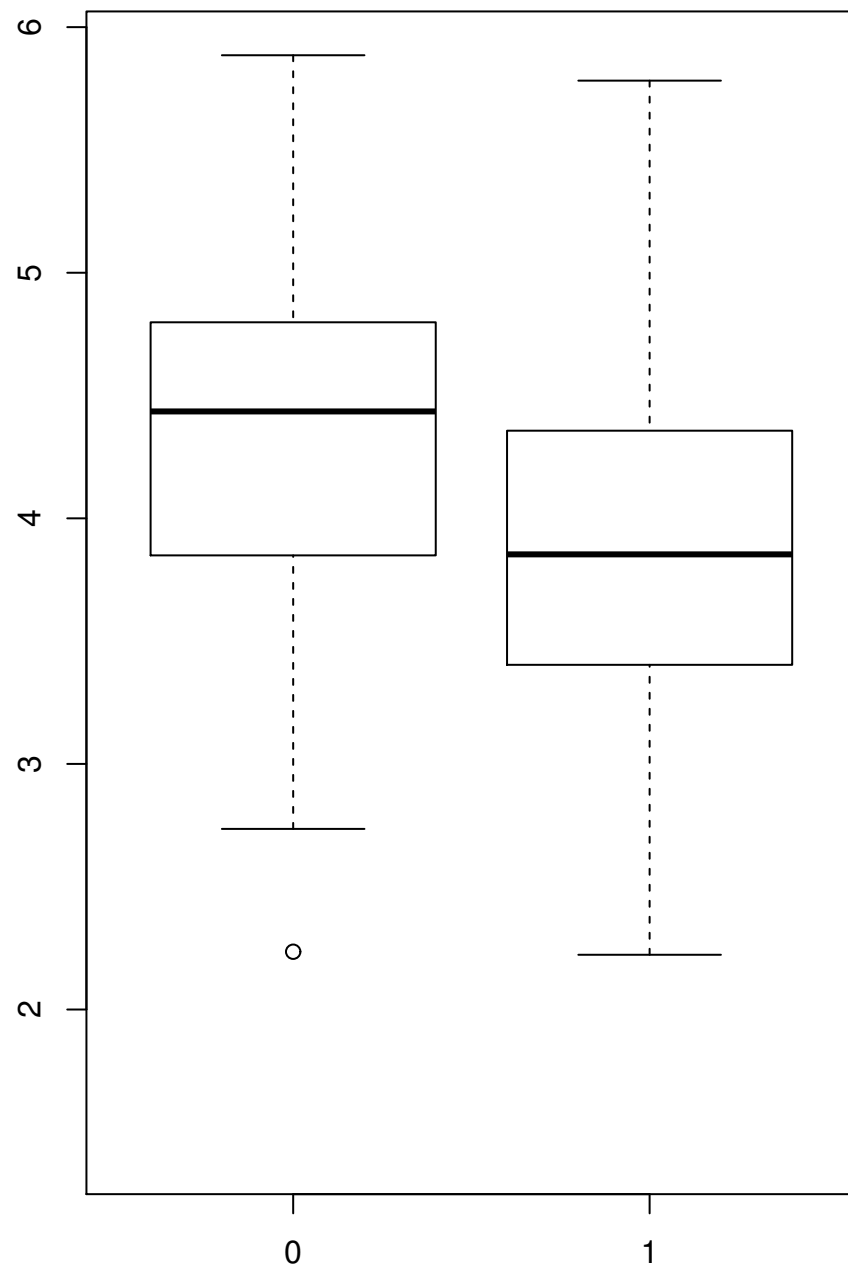

**hsa-miR-938**  
**(GSE67138)**

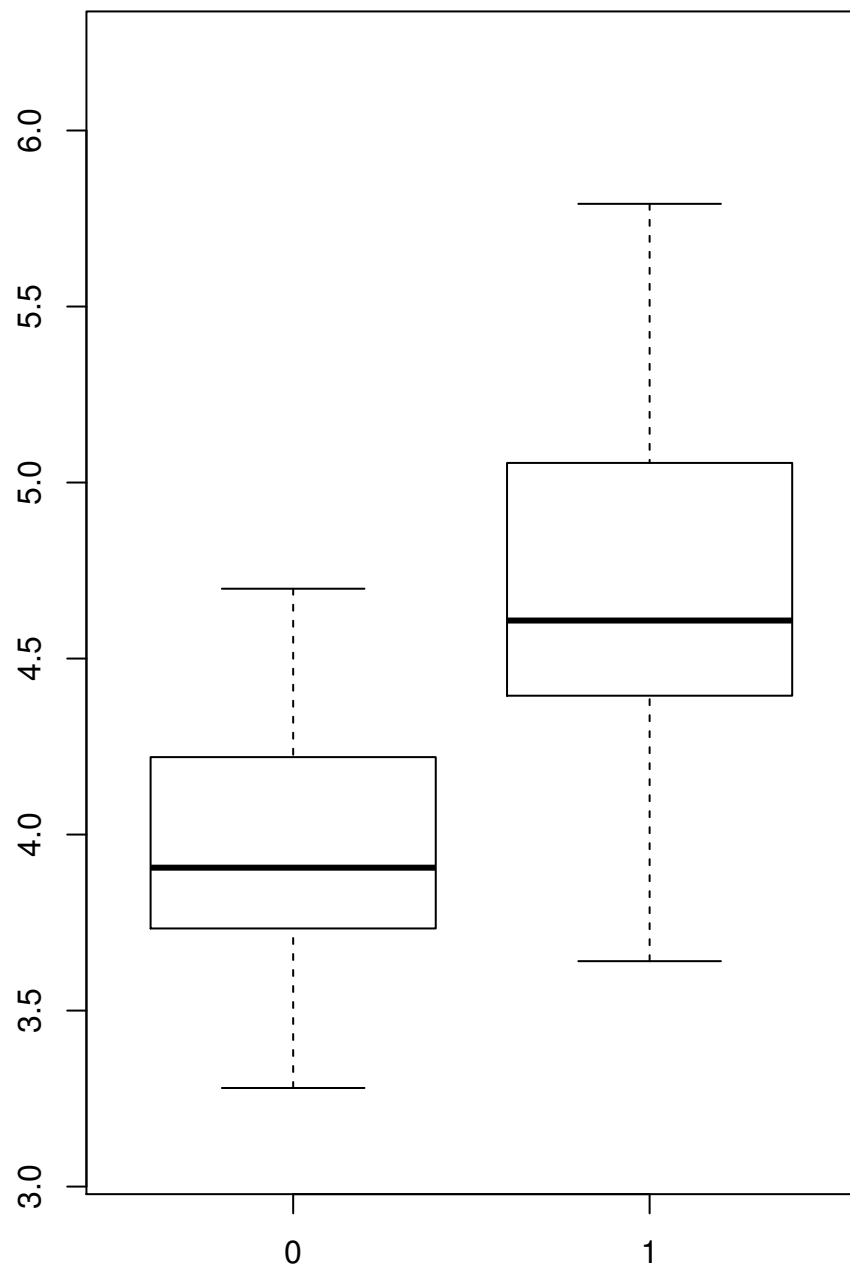

**hsa-miR-938**  
**(GSE67139)**

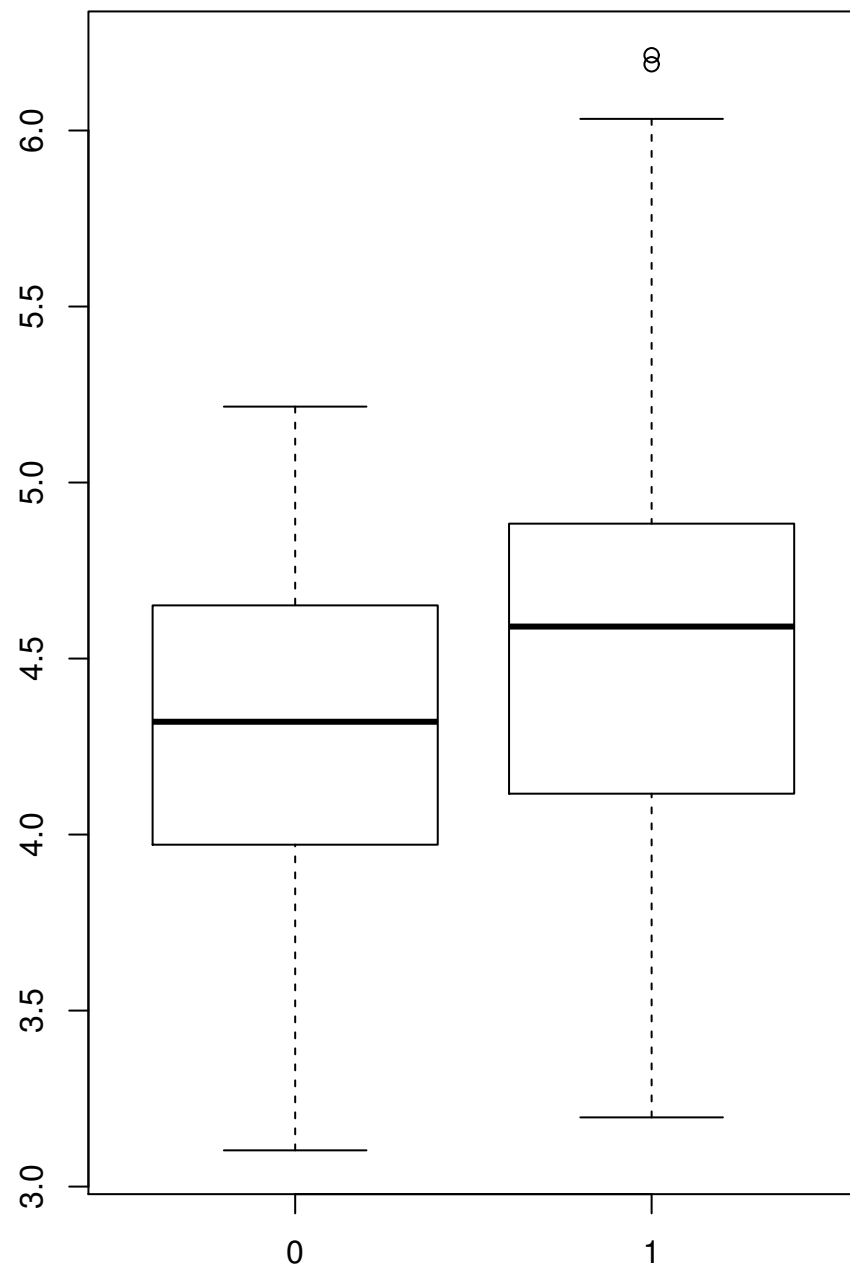

**hsa-miR-940  
(GSE67138)**

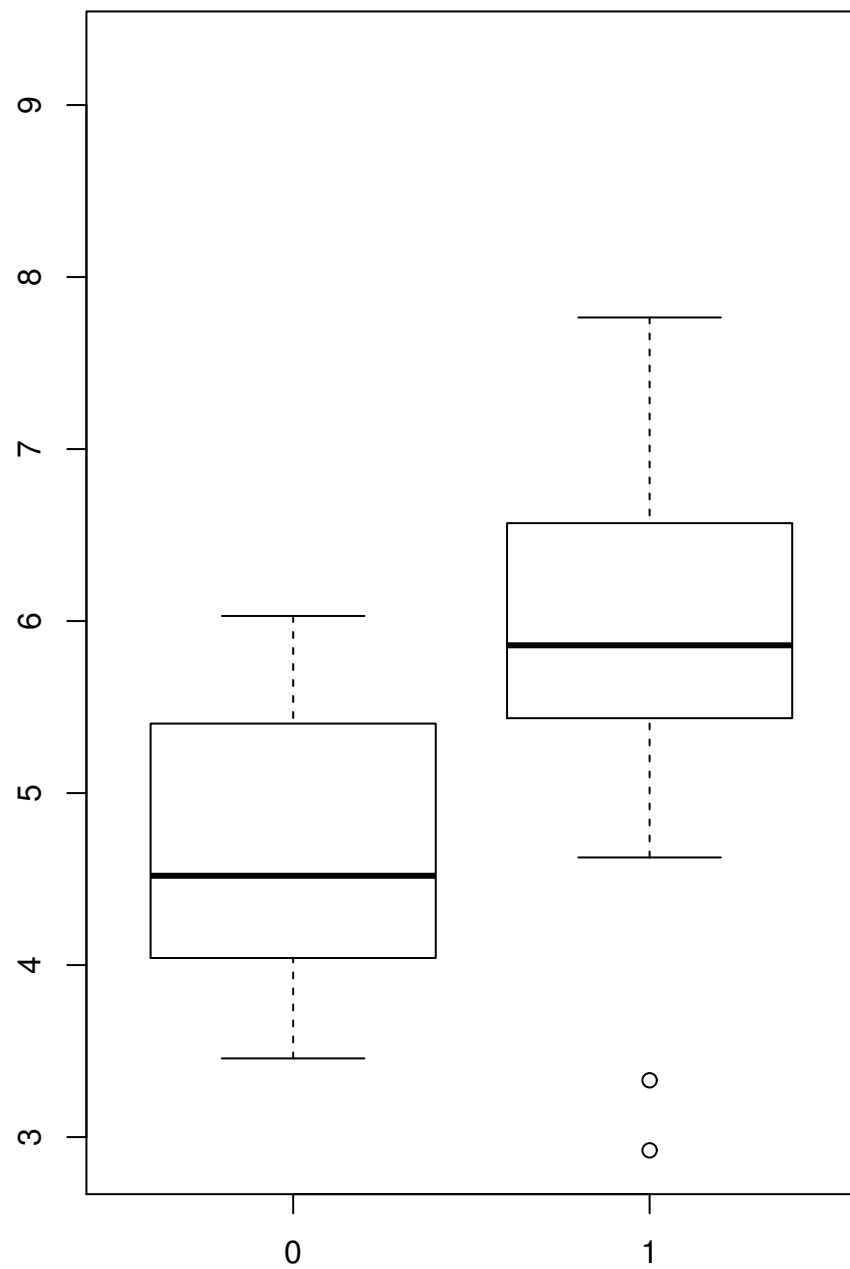

**hsa-miR-940  
(GSE67139)**

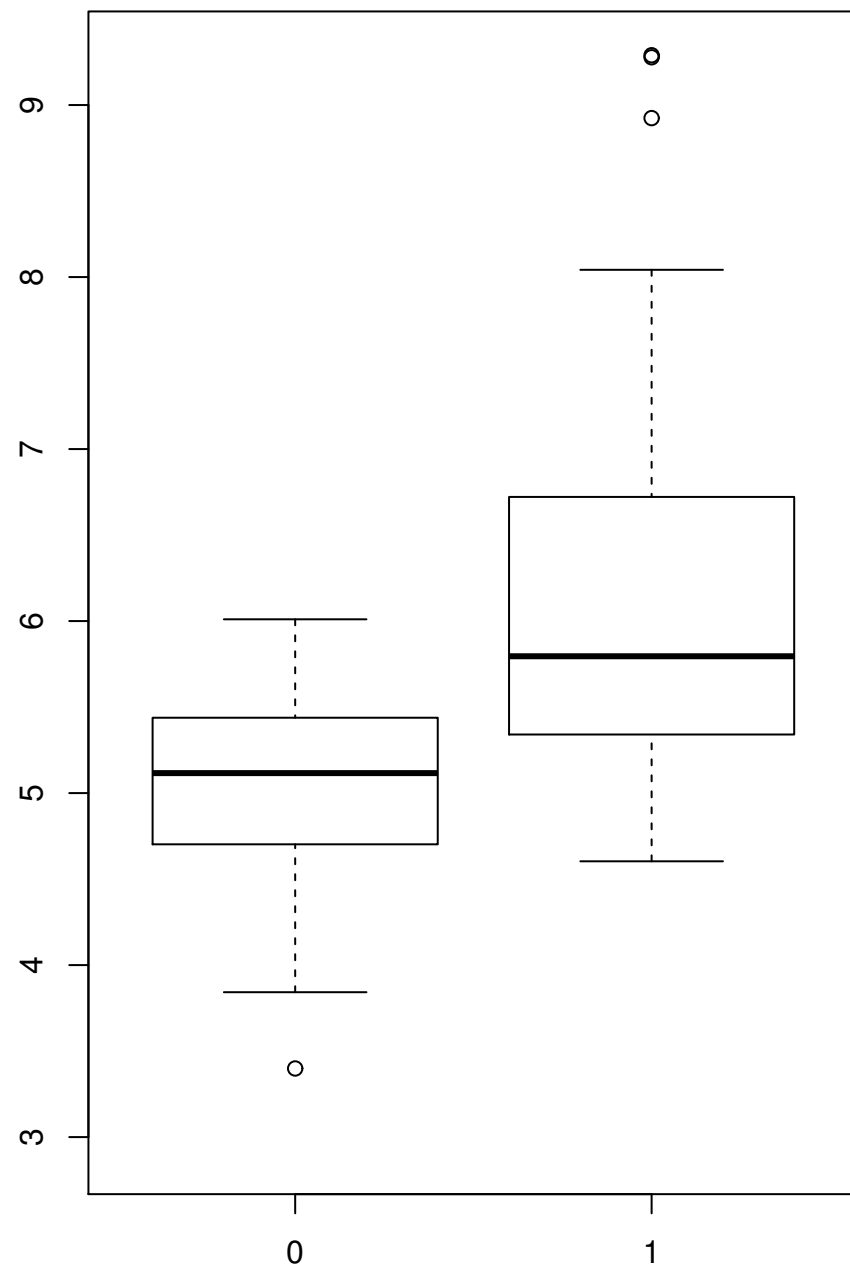

**hsa-miR-98  
(GSE67138)**

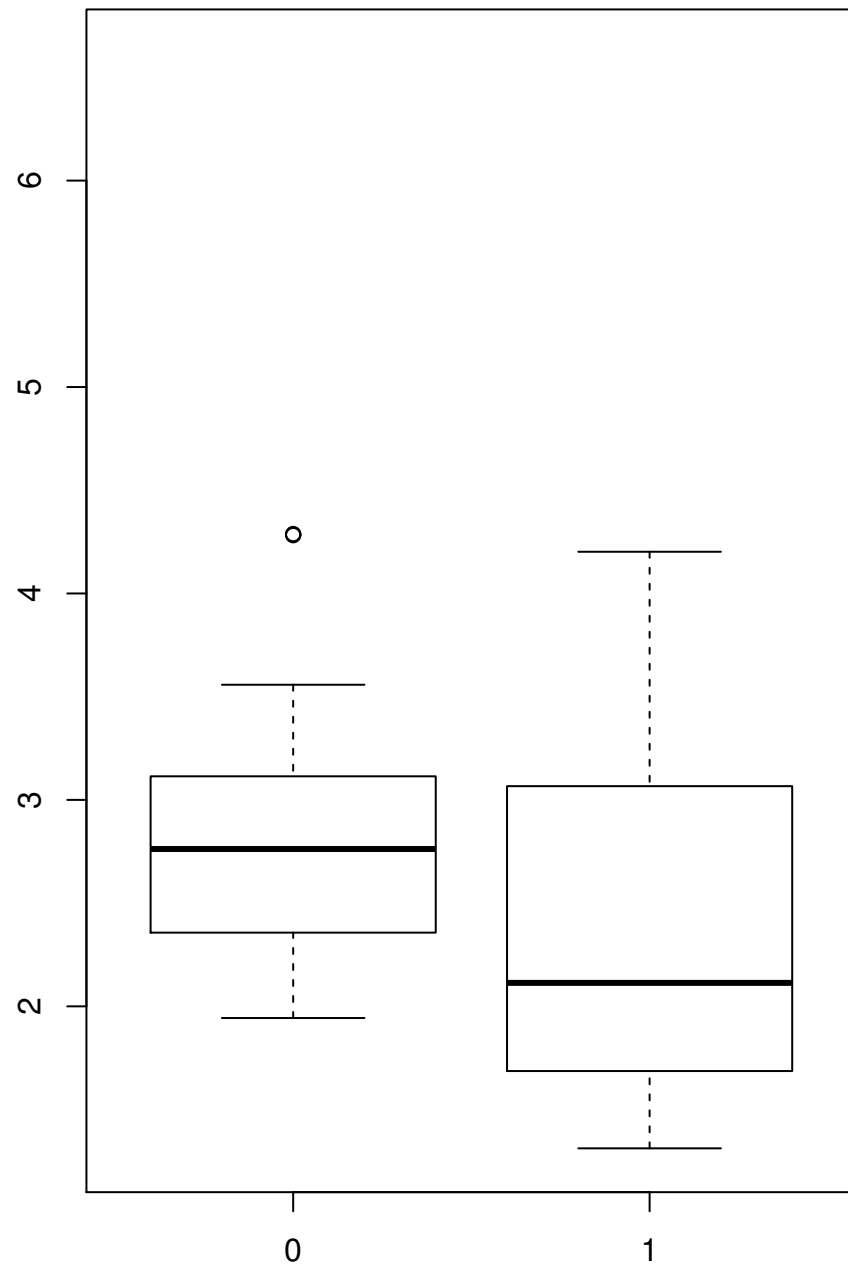

**hsa-miR-98  
(GSE67139)**

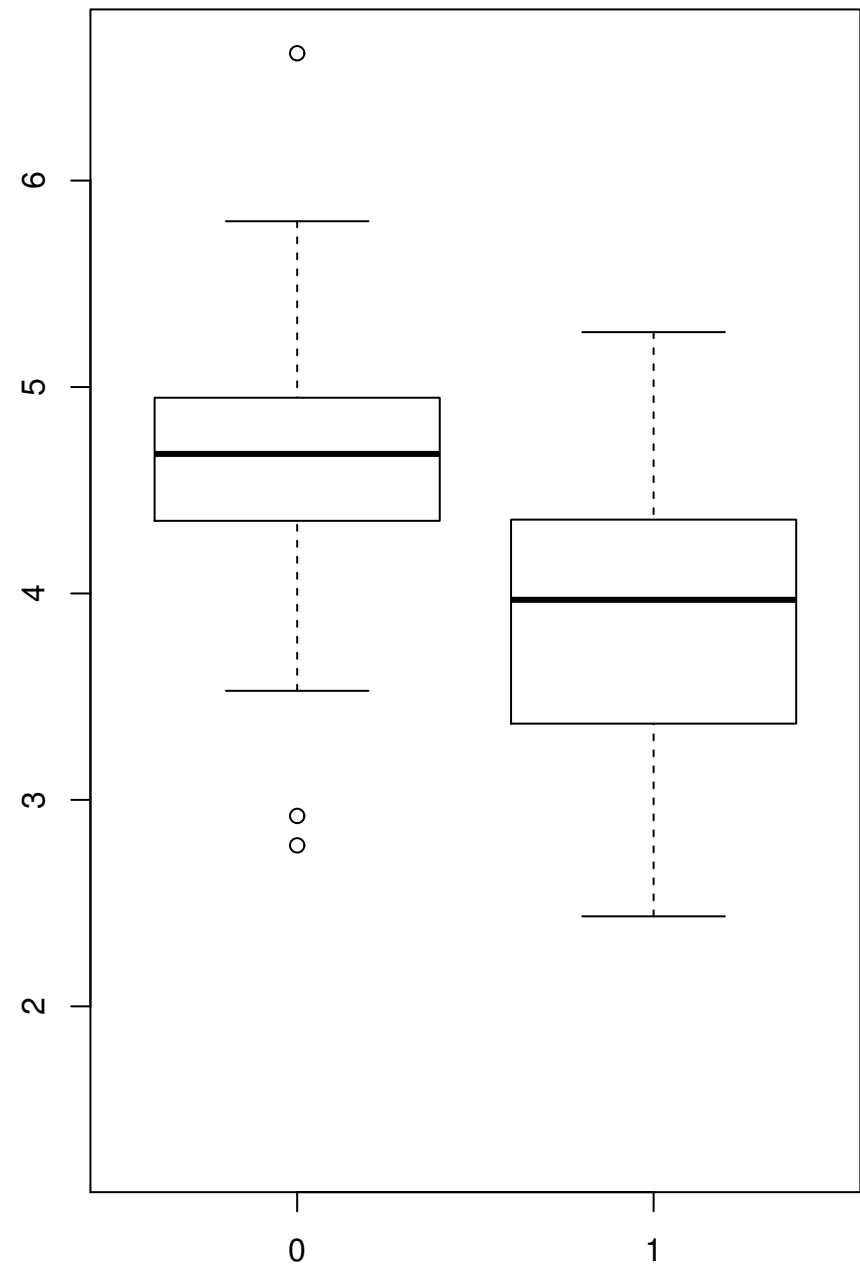

Supplement: f1 [file 6591634.f1.zip]
