# Supplementary material for: Detecting Differentially Variable MicroRNAs via Model-Based Clustering
Source: Hindawi journal article supplement (doi:10.1155/2018/6591634), 2018-07-12

**hsa-let-7f**  
**(GSE67138)**

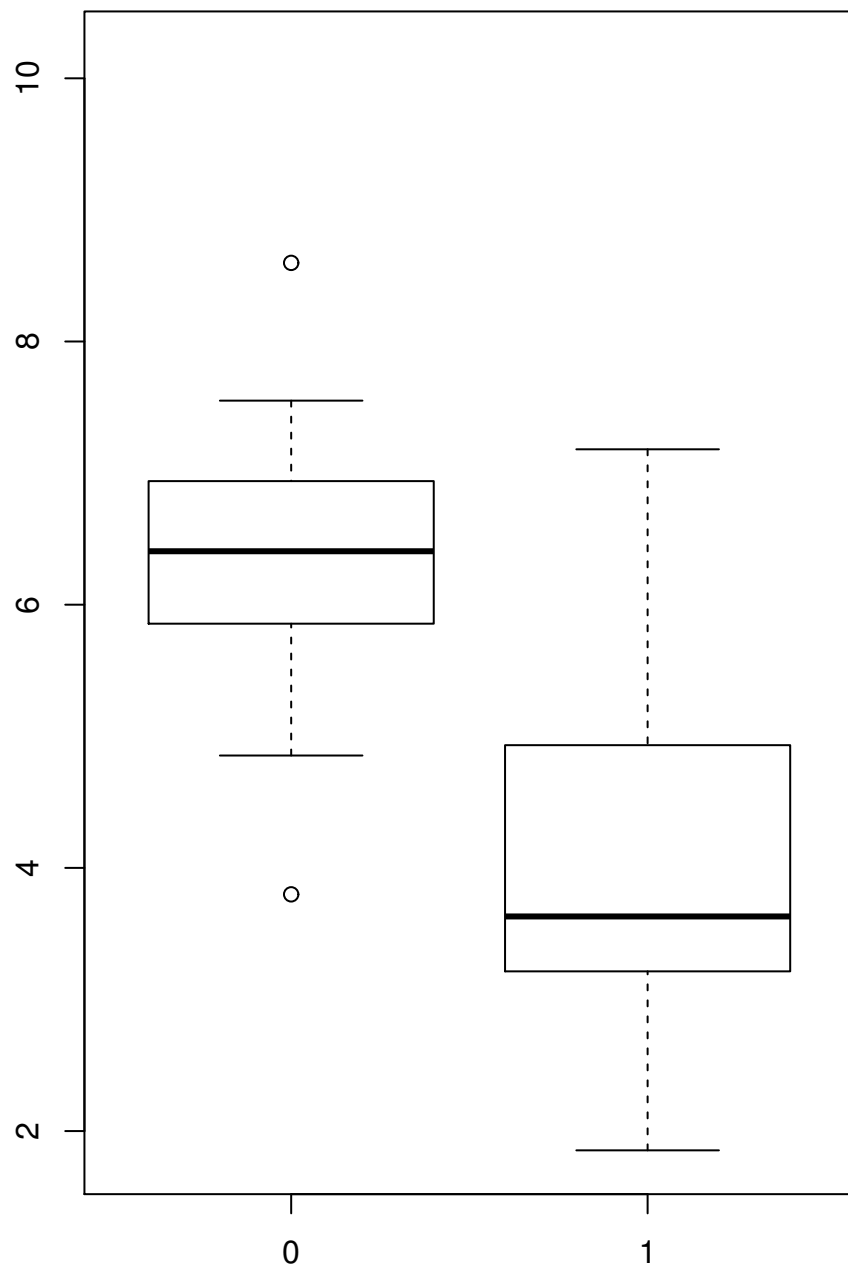

**hsa-let-7f**  
**(GSE67139)**

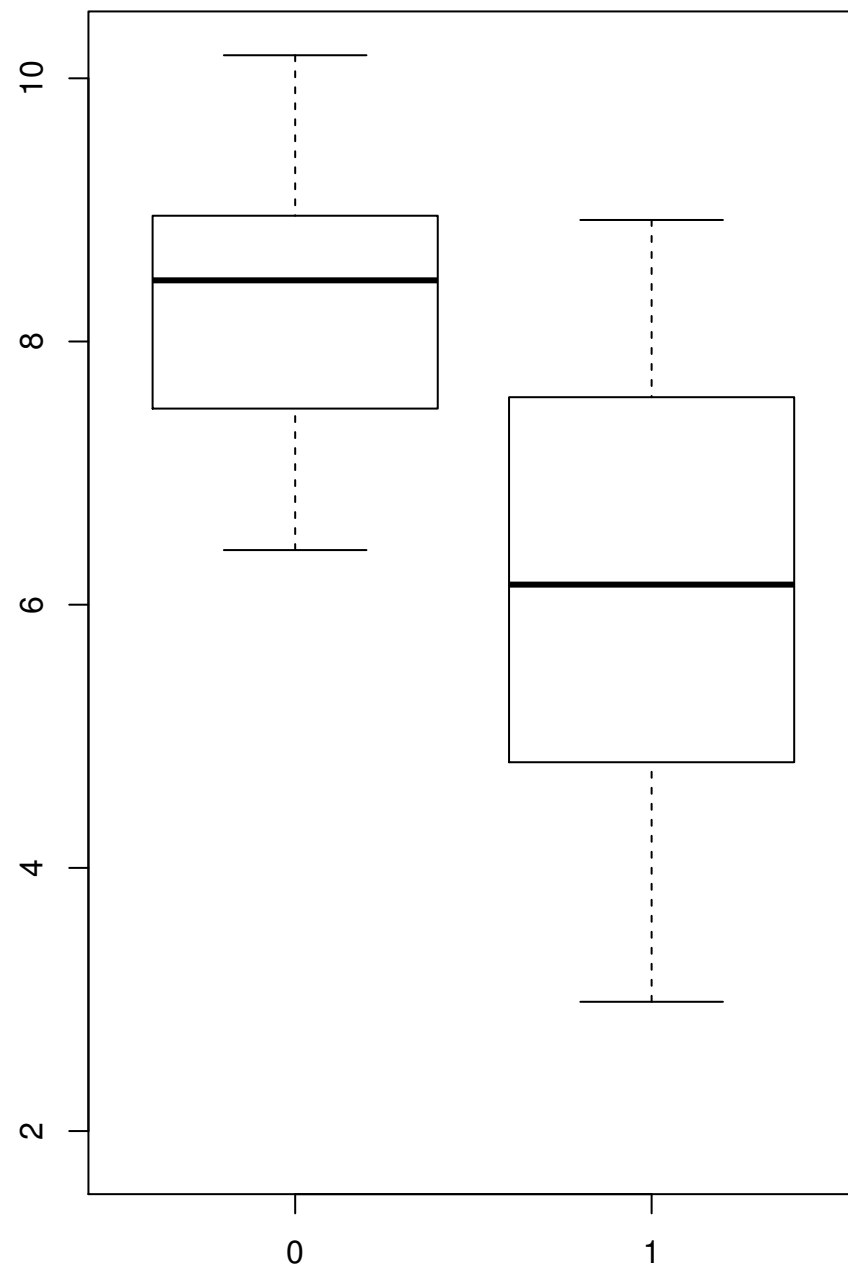

**hsa-let-7g**  
**(GSE67138)**

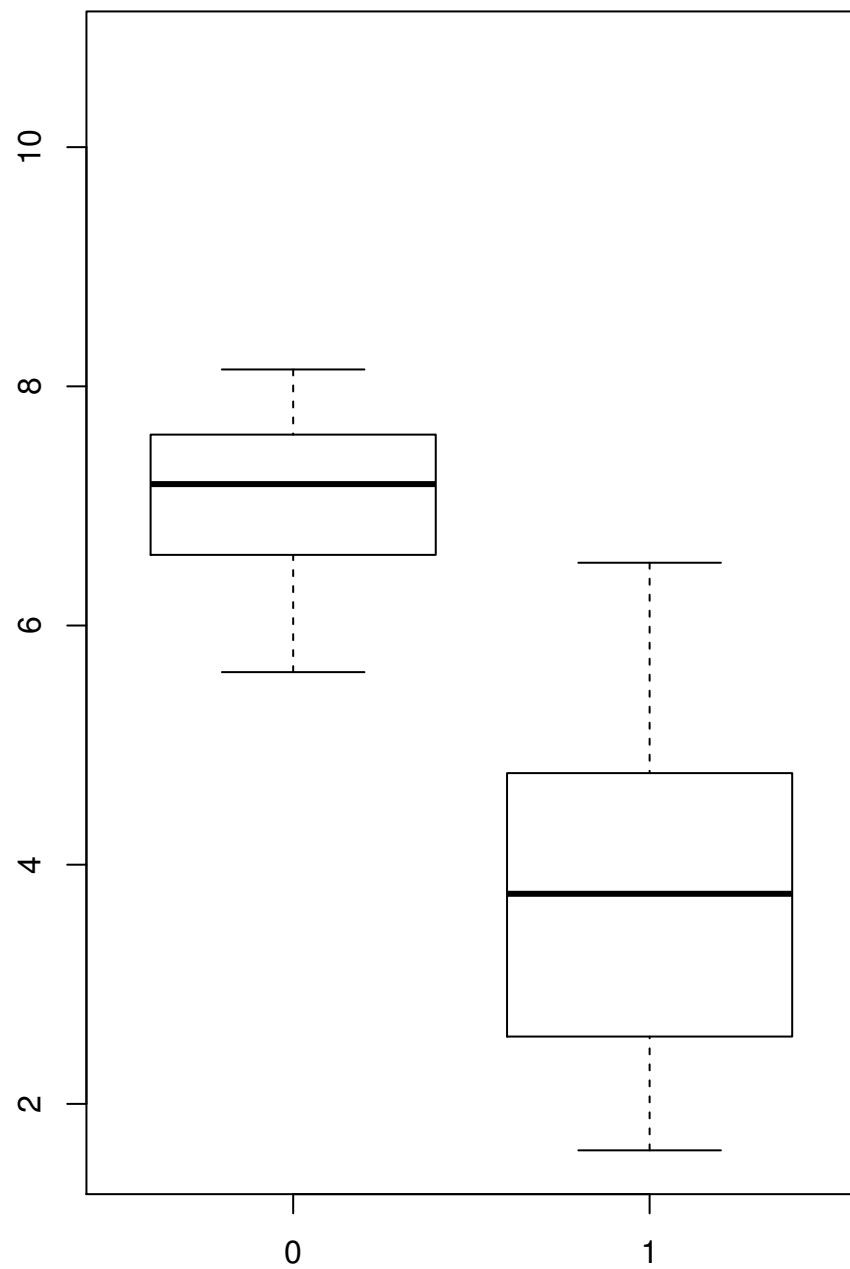

**hsa-let-7g**  
**(GSE67139)**

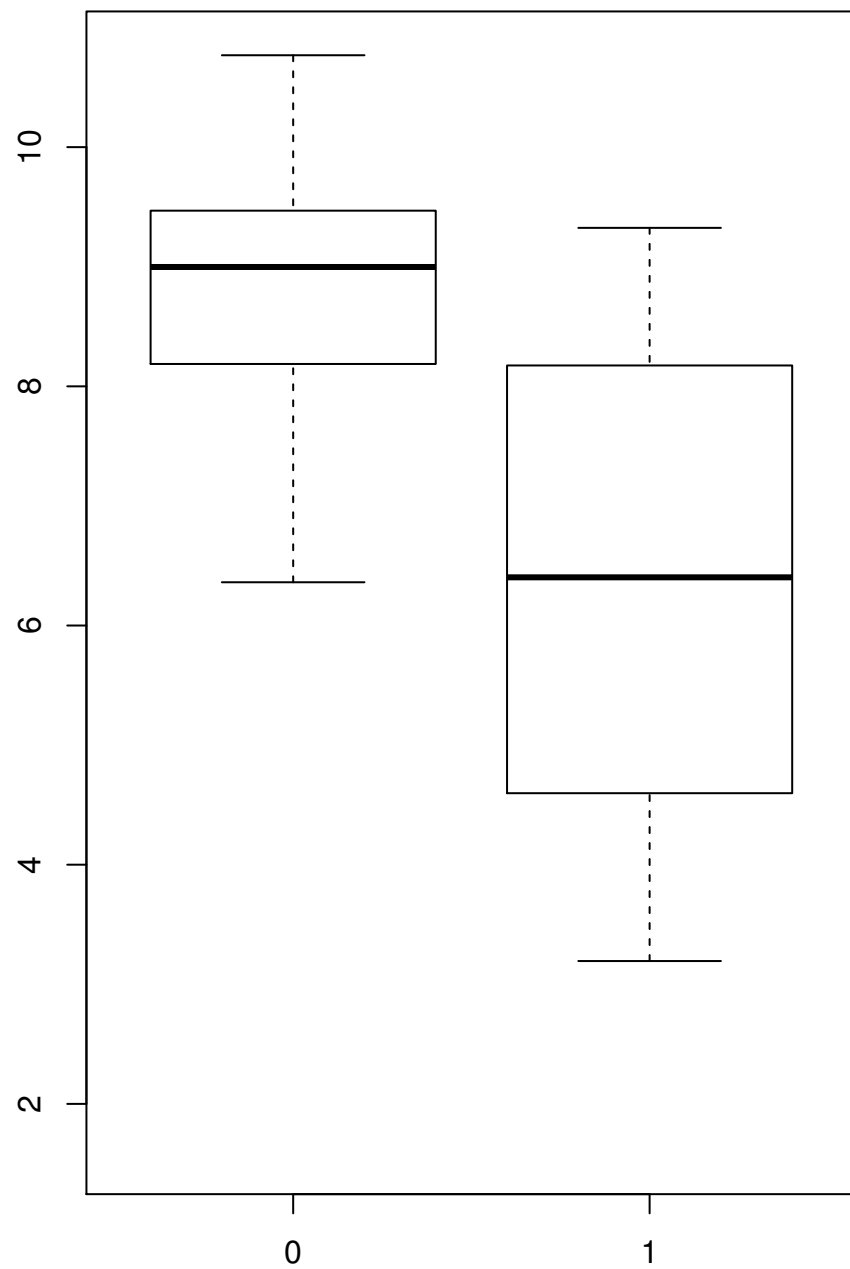

**hsa-let-7i**  
**(GSE67138)**

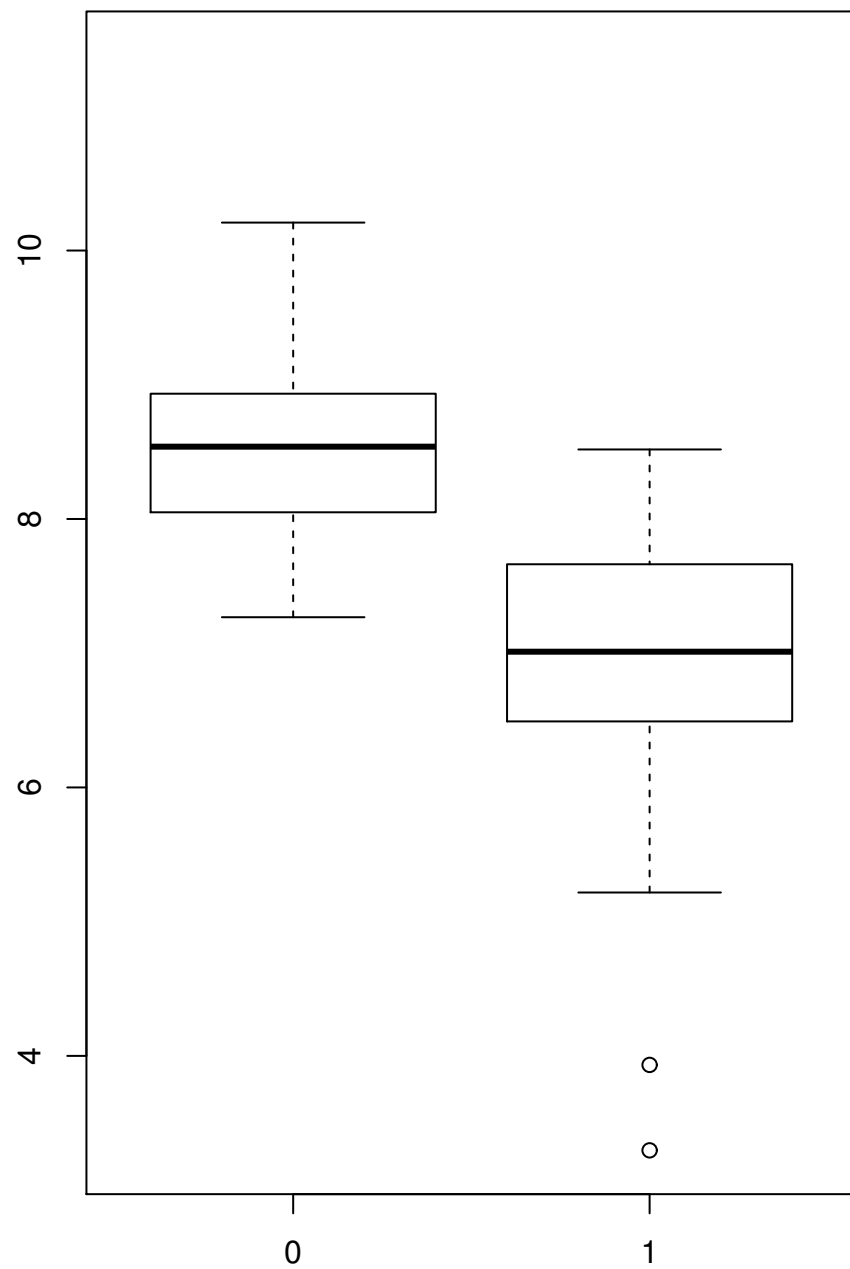

**hsa-let-7i**  
**(GSE67139)**

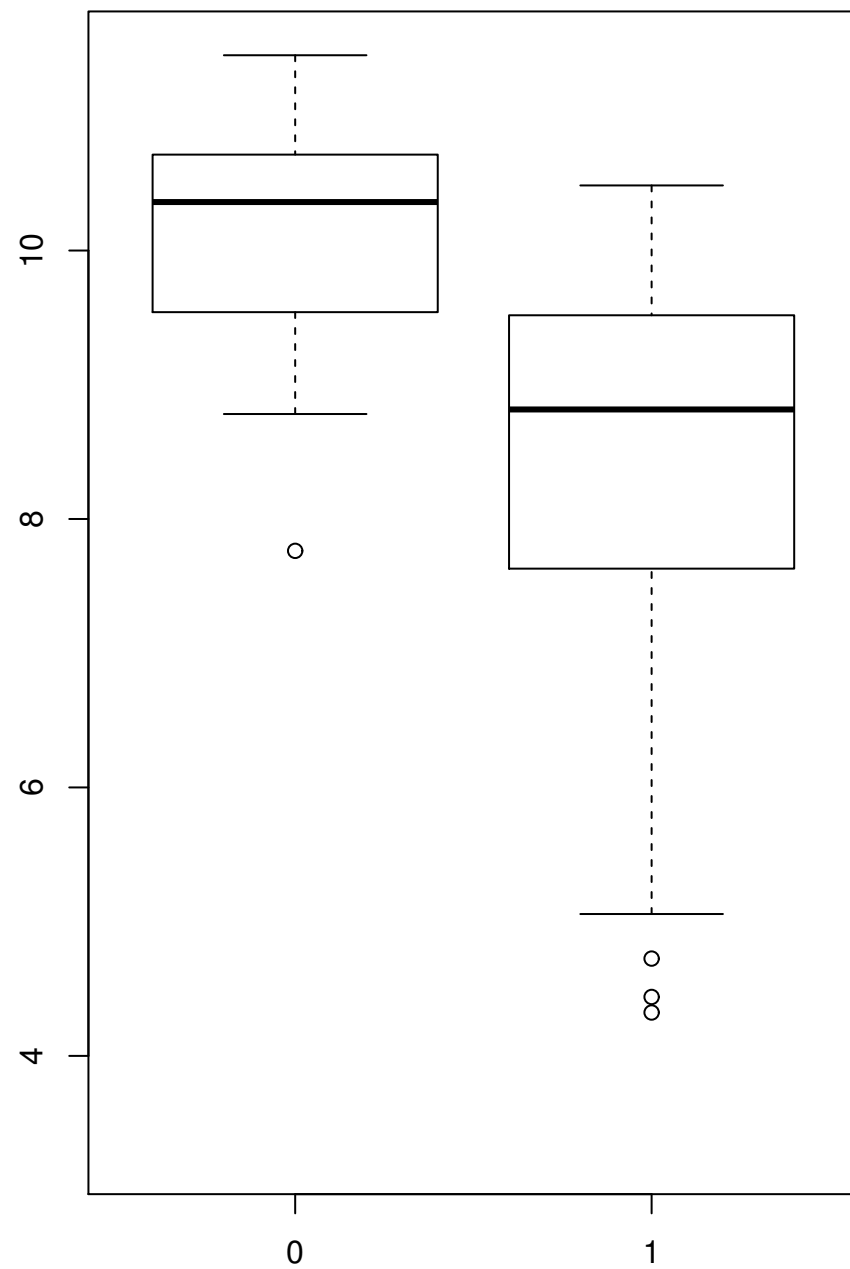

**hsa-miR-100  
(GSE67138)**

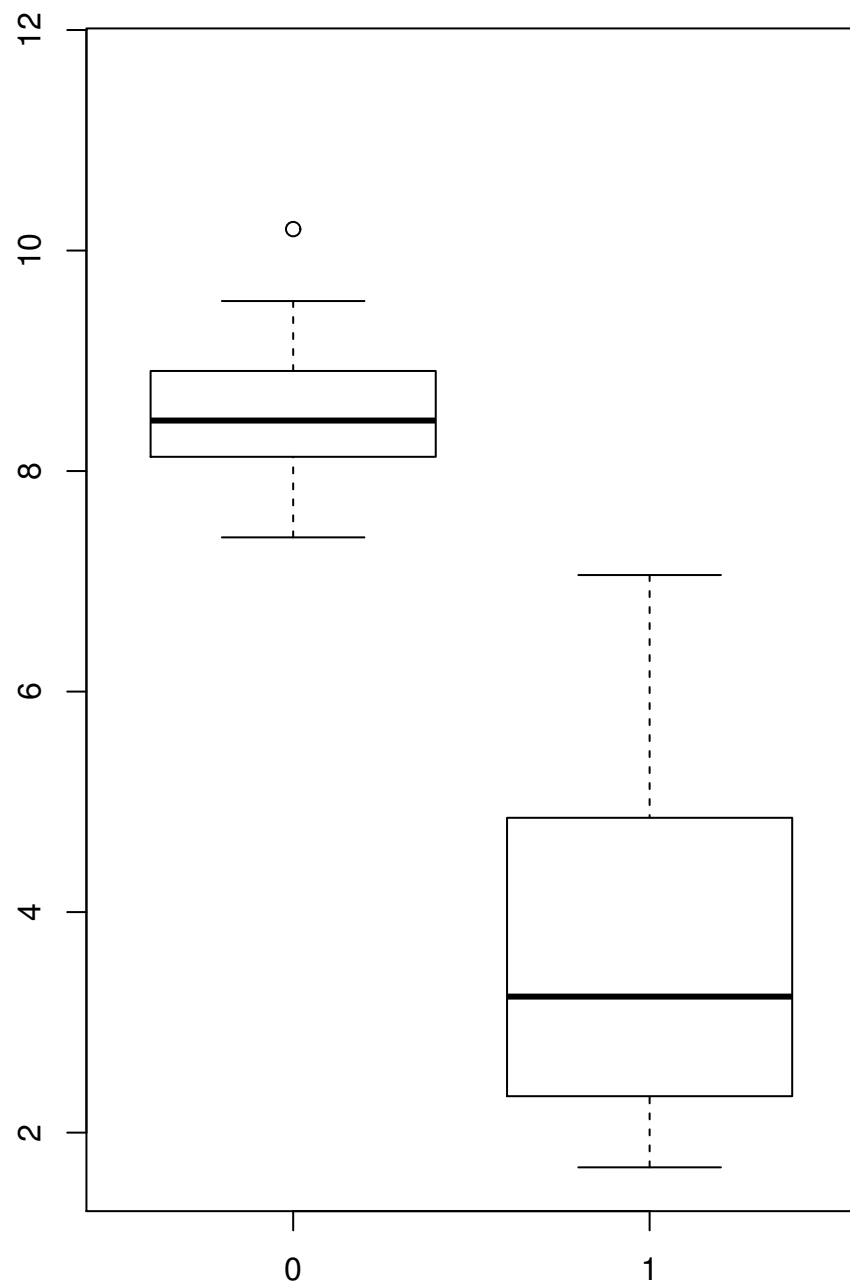

**hsa-miR-100  
(GSE67139)**

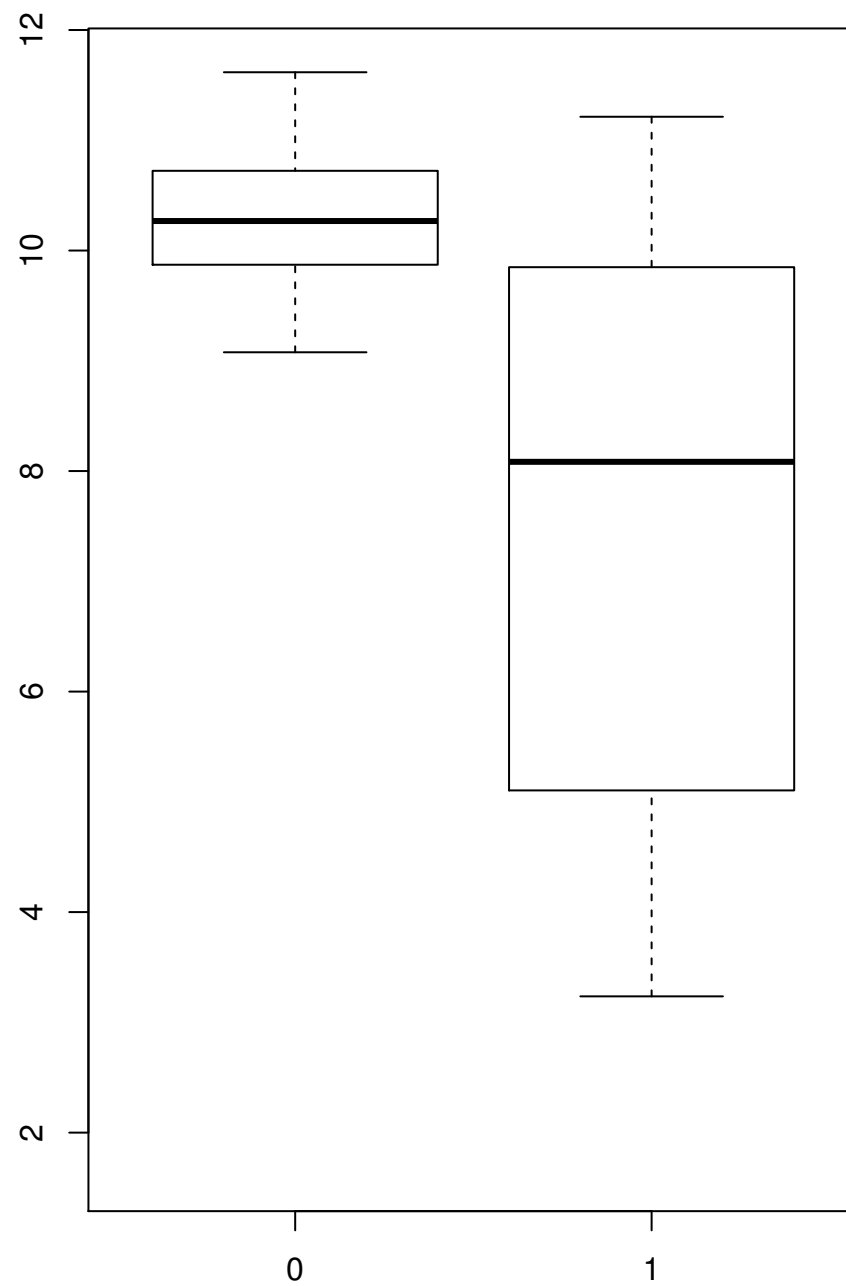

**hsa-miR-106a**  
**(GSE67138)**

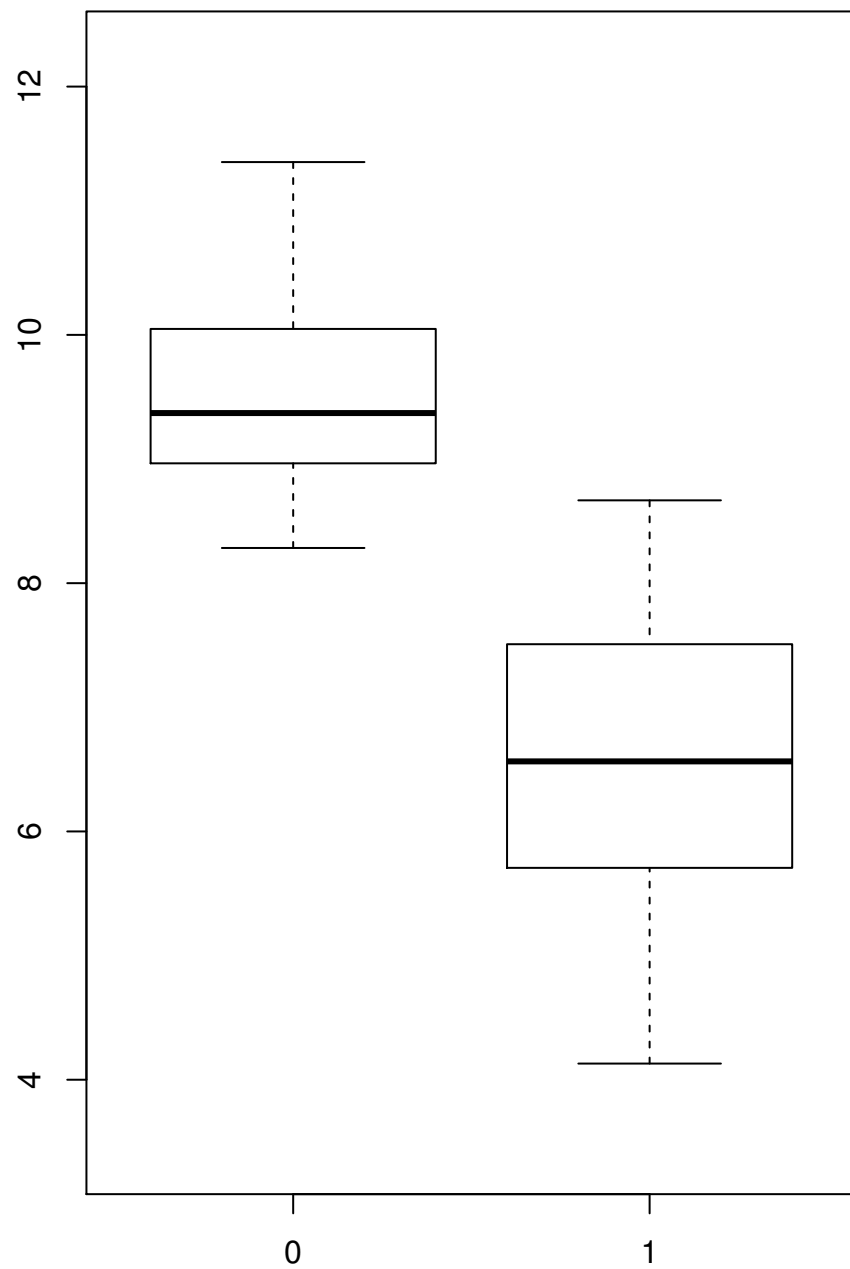

**hsa-miR-106a**  
**(GSE67139)**

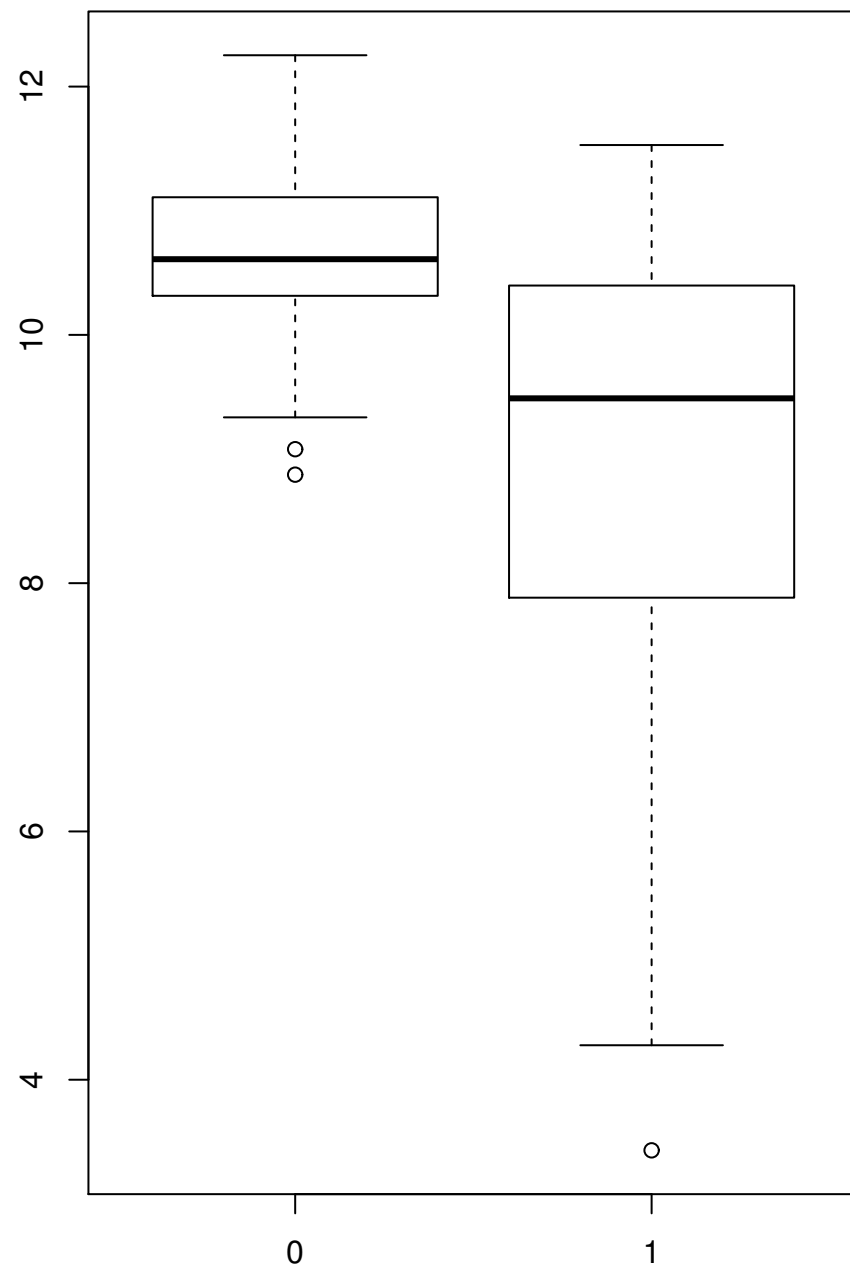

**hsa-miR-106b  
(GSE67138)**

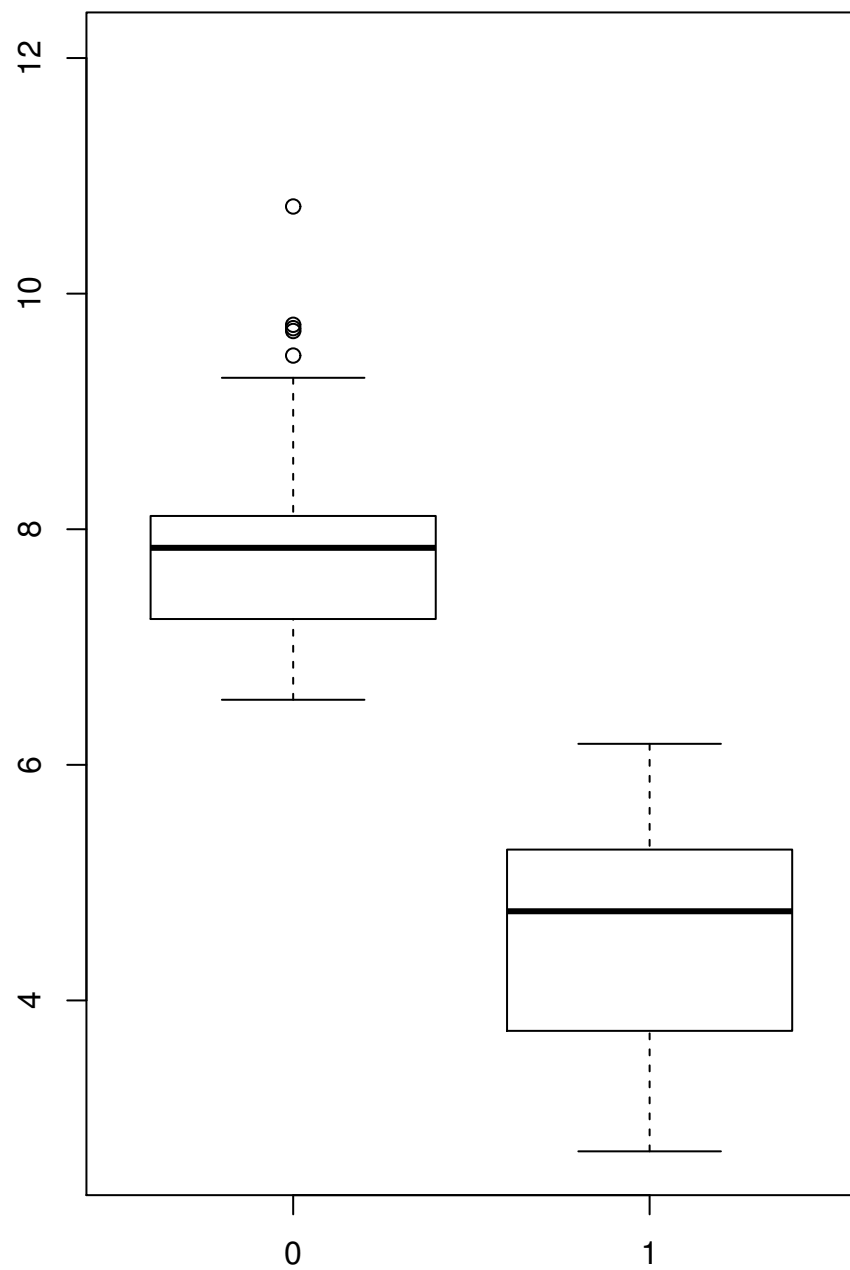

**hsa-miR-106b  
(GSE67139)**

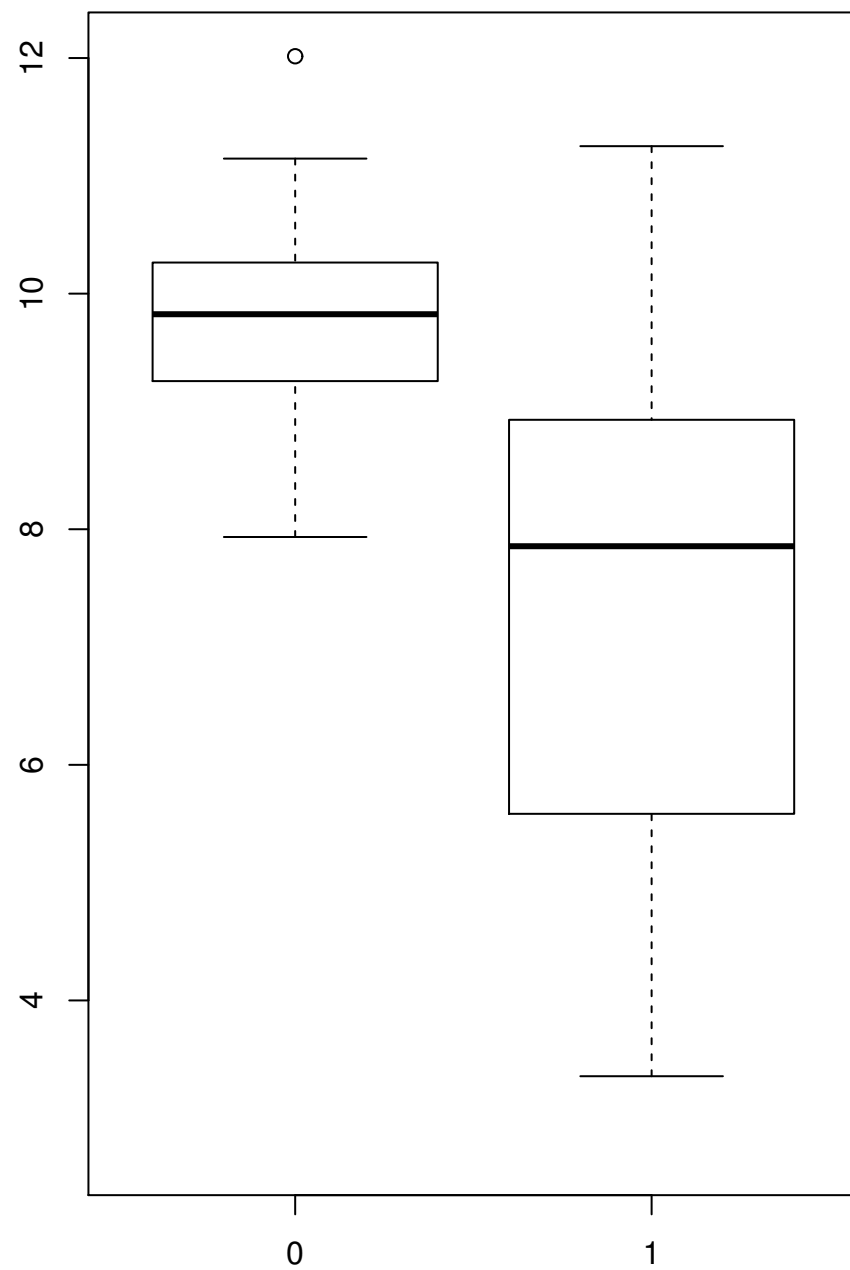

**hsa-miR-1202  
(GSE67138)**

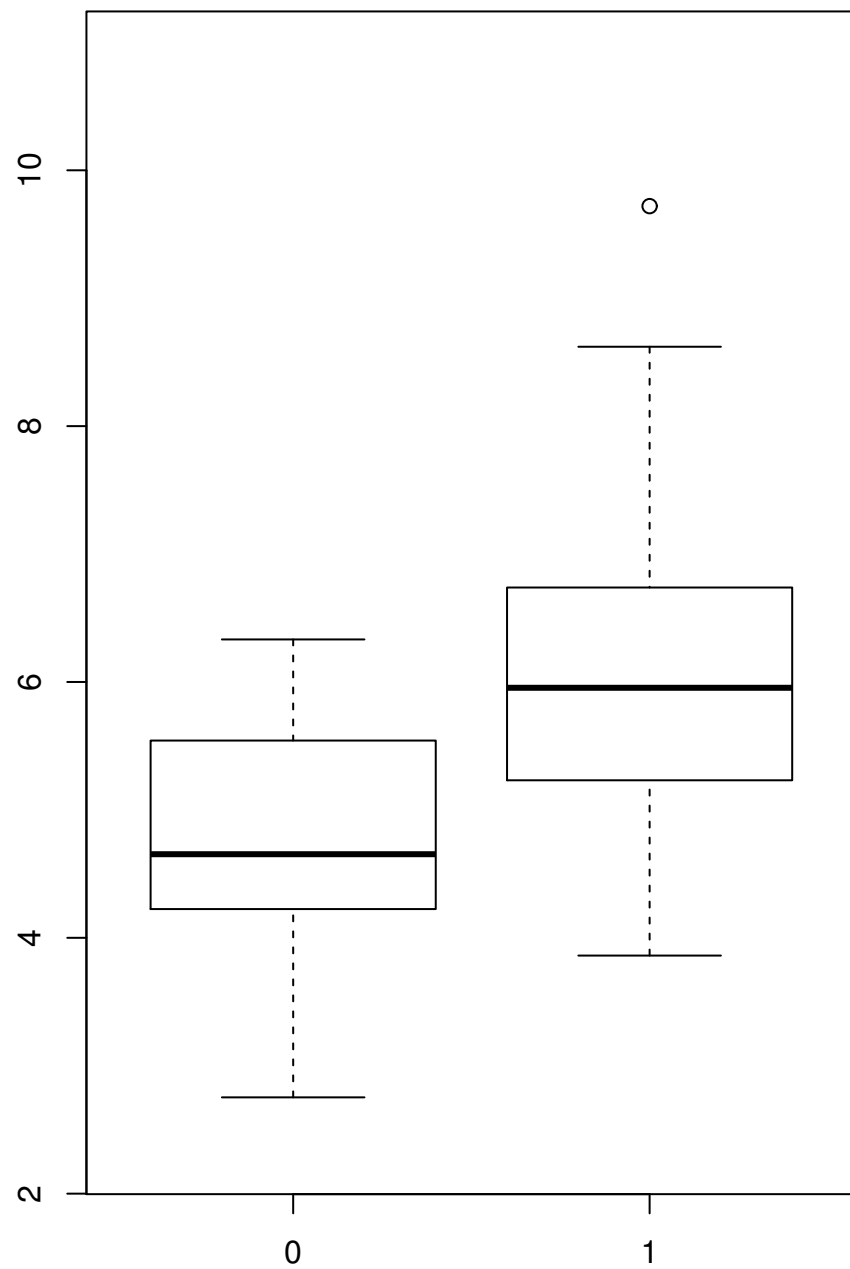

**hsa-miR-1202  
(GSE67139)**

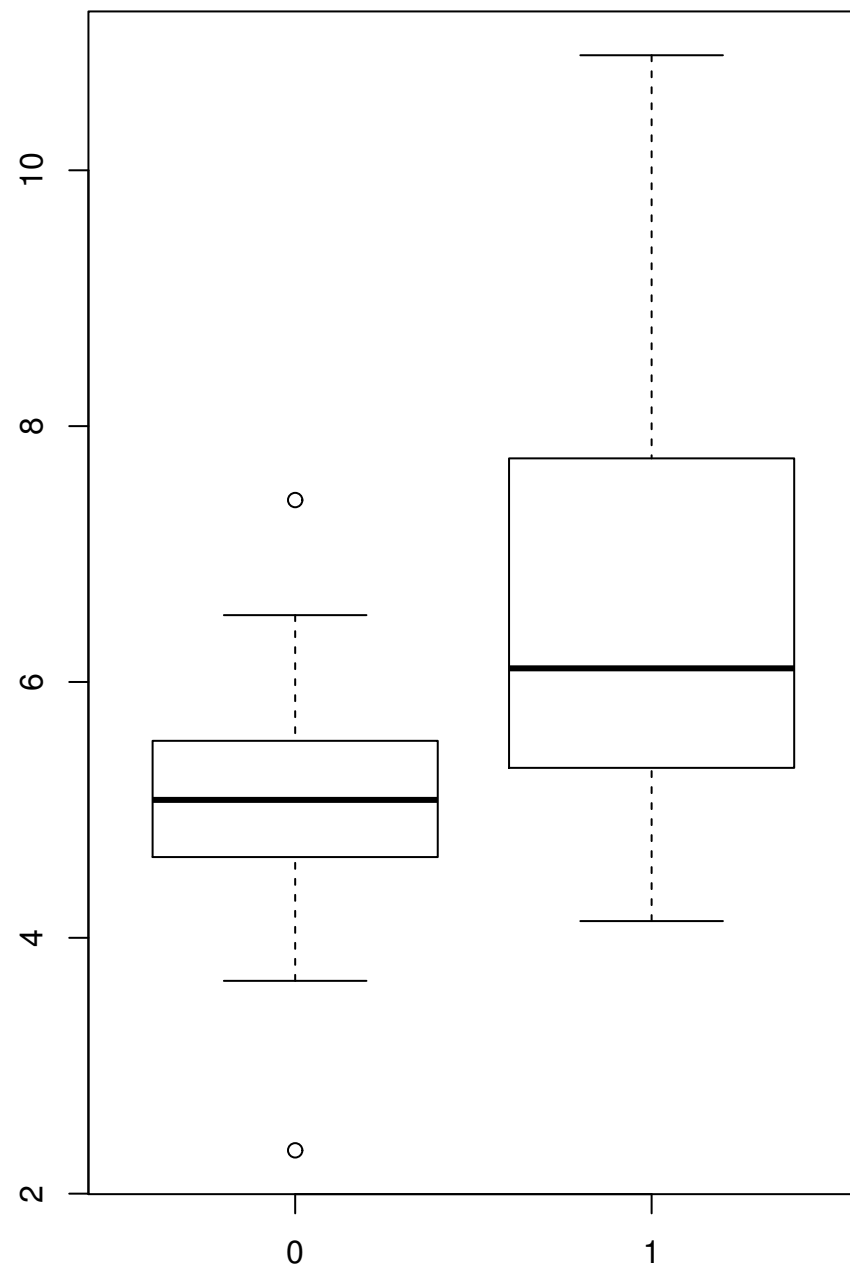

**hsa-miR-1224-5p  
(GSE67138)**

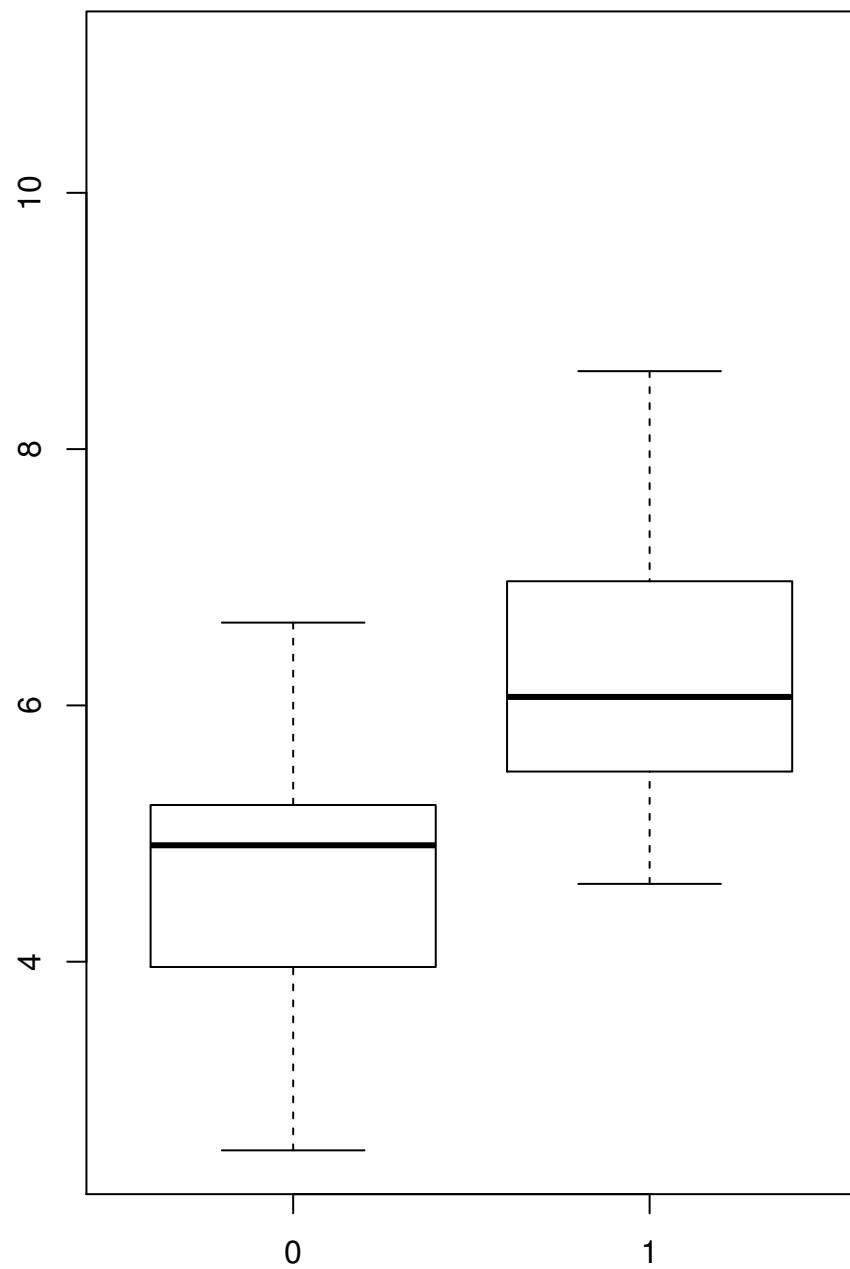

**hsa-miR-1224-5p  
(GSE67139)**

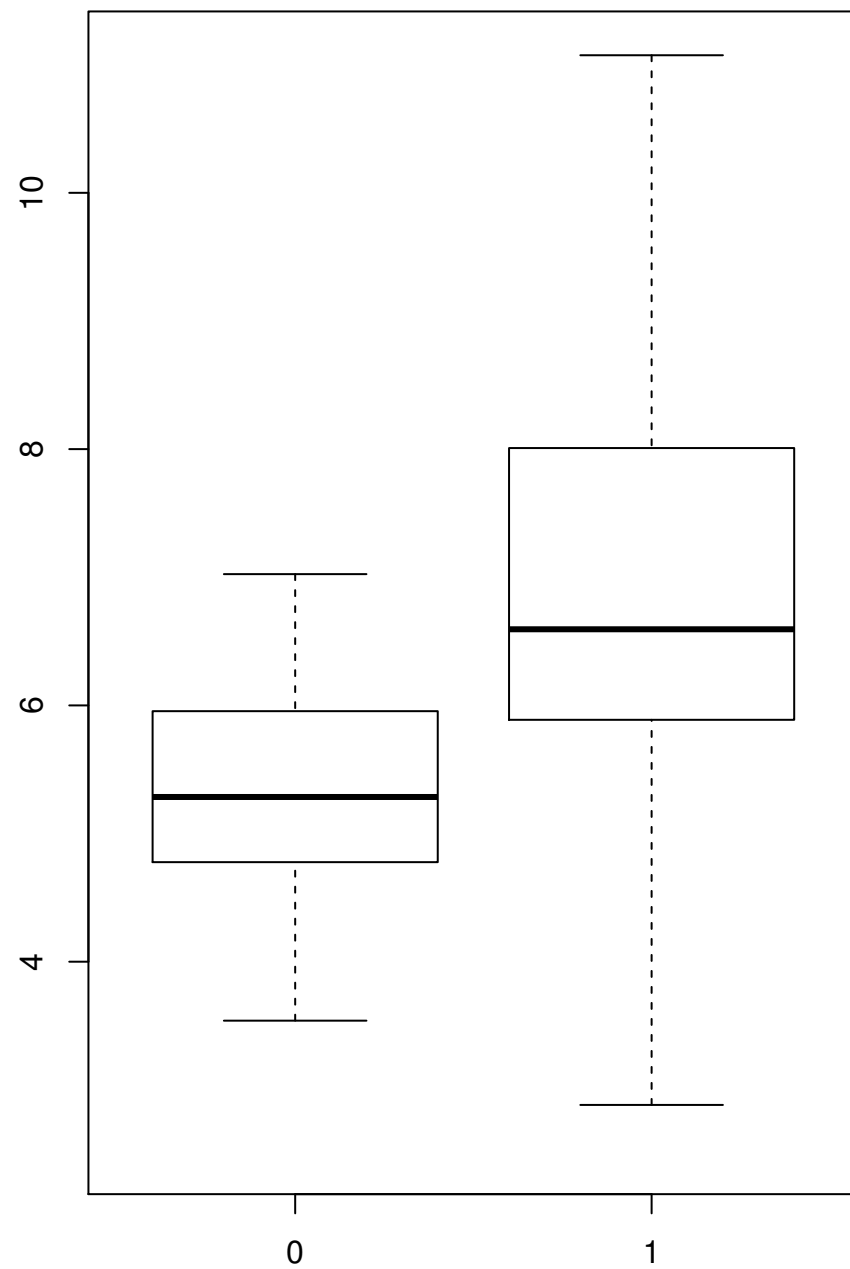



**hsa-miR-1225-5p  
(GSE67138)**

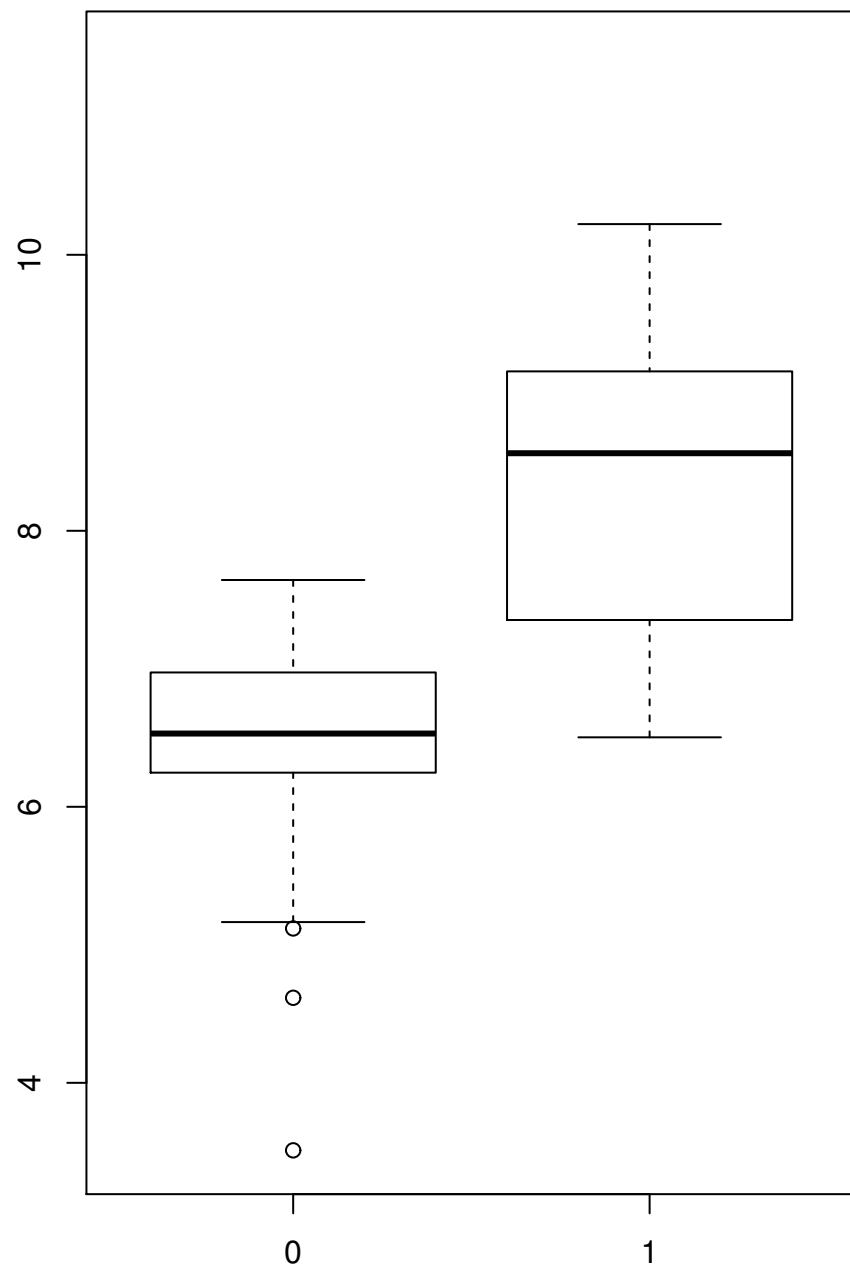

**hsa-miR-1225-5p  
(GSE67139)**

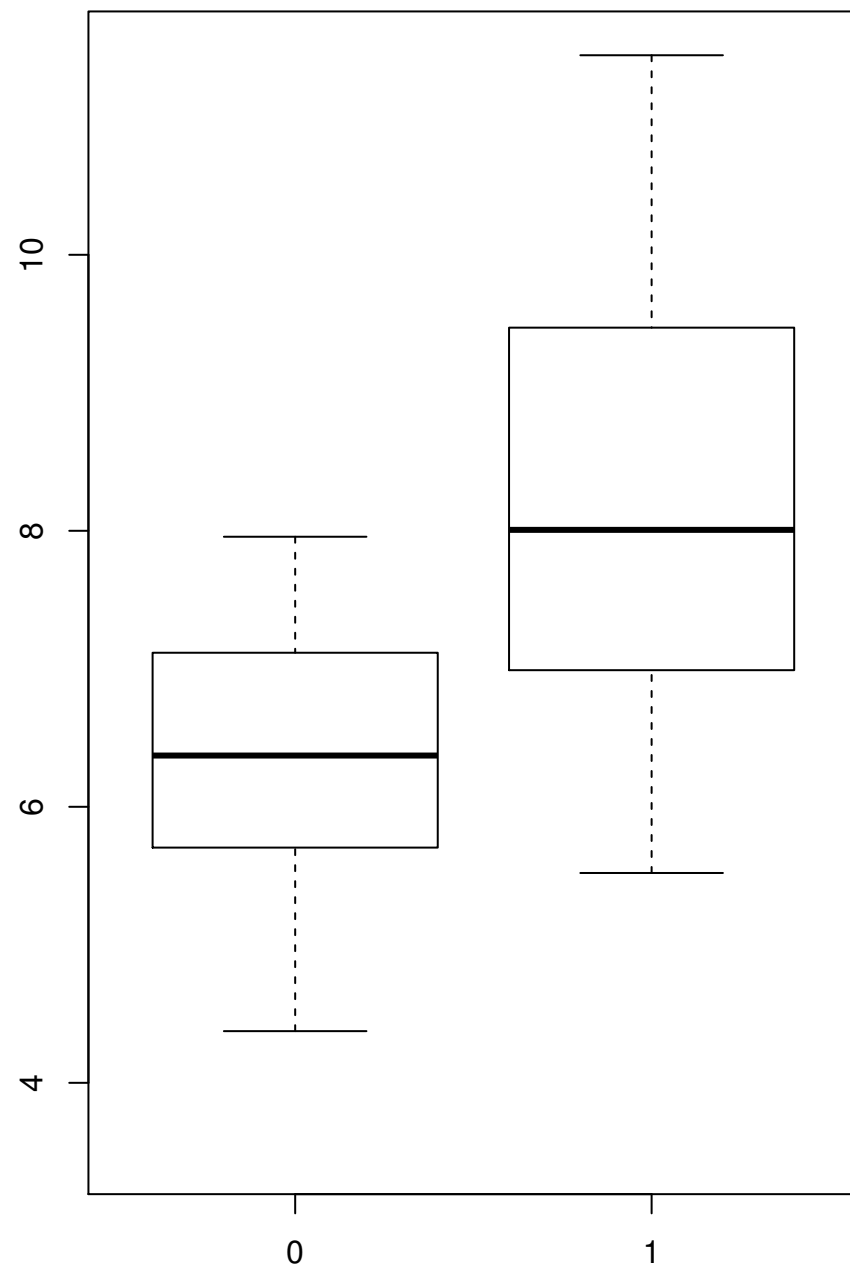

**hsa-miR-1228  
(GSE67138)**

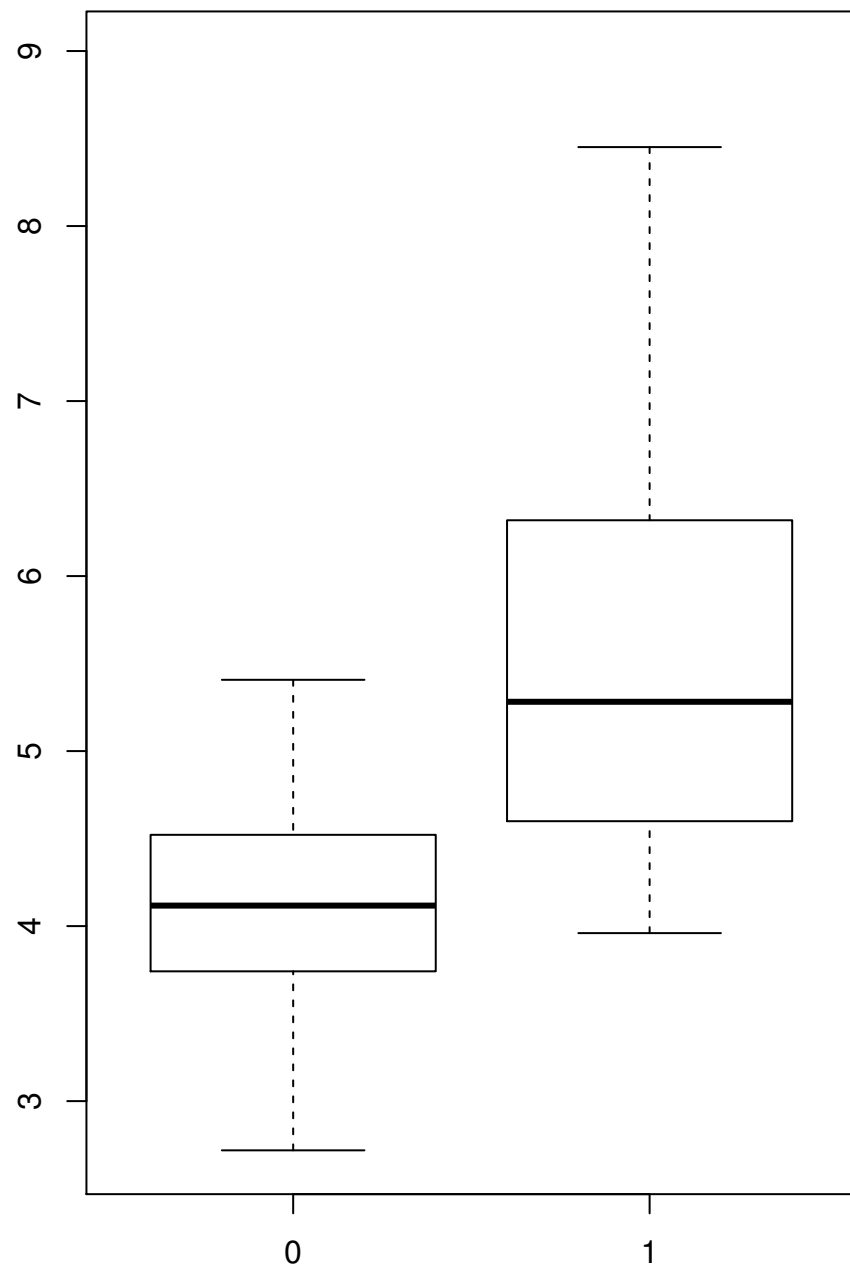

**hsa-miR-1228  
(GSE67139)**

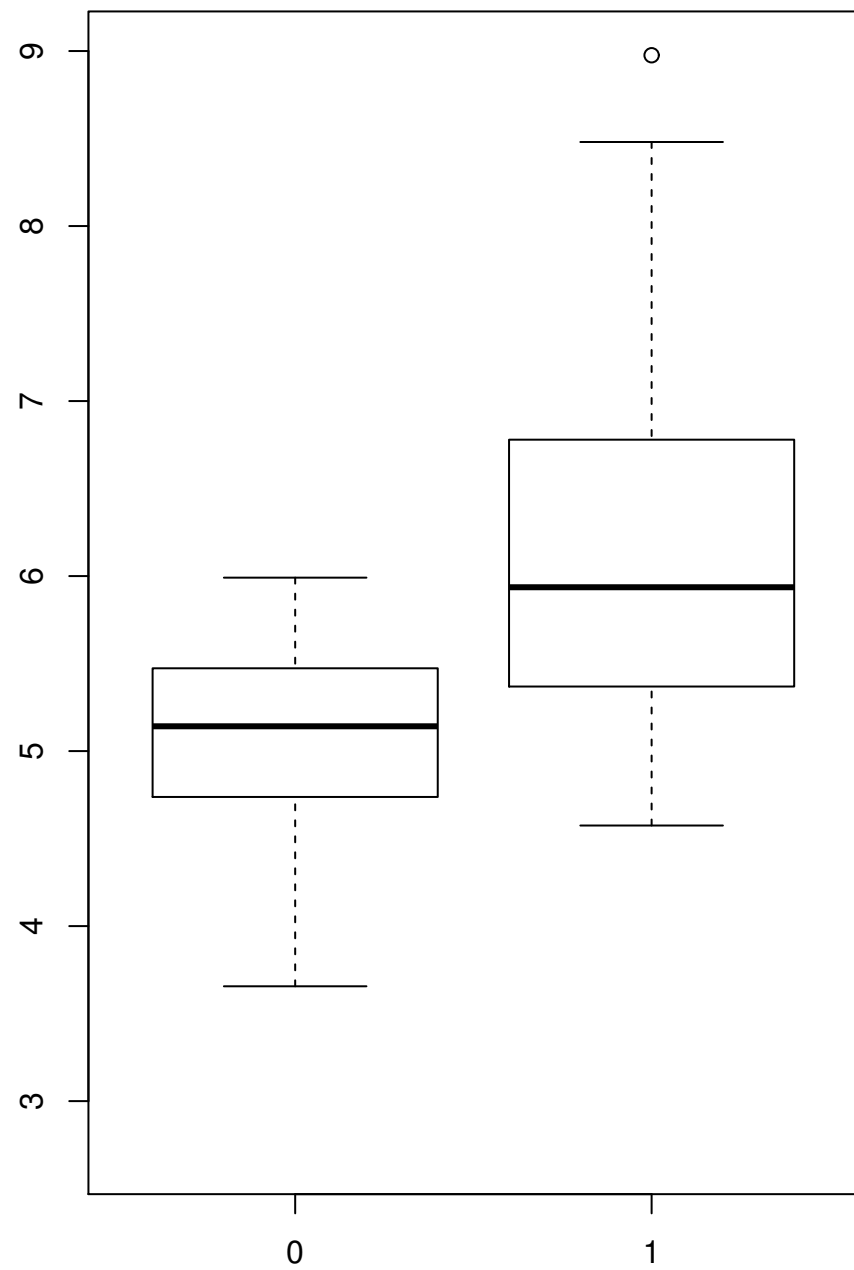

**hsa-miR-122  
(GSE67138)**

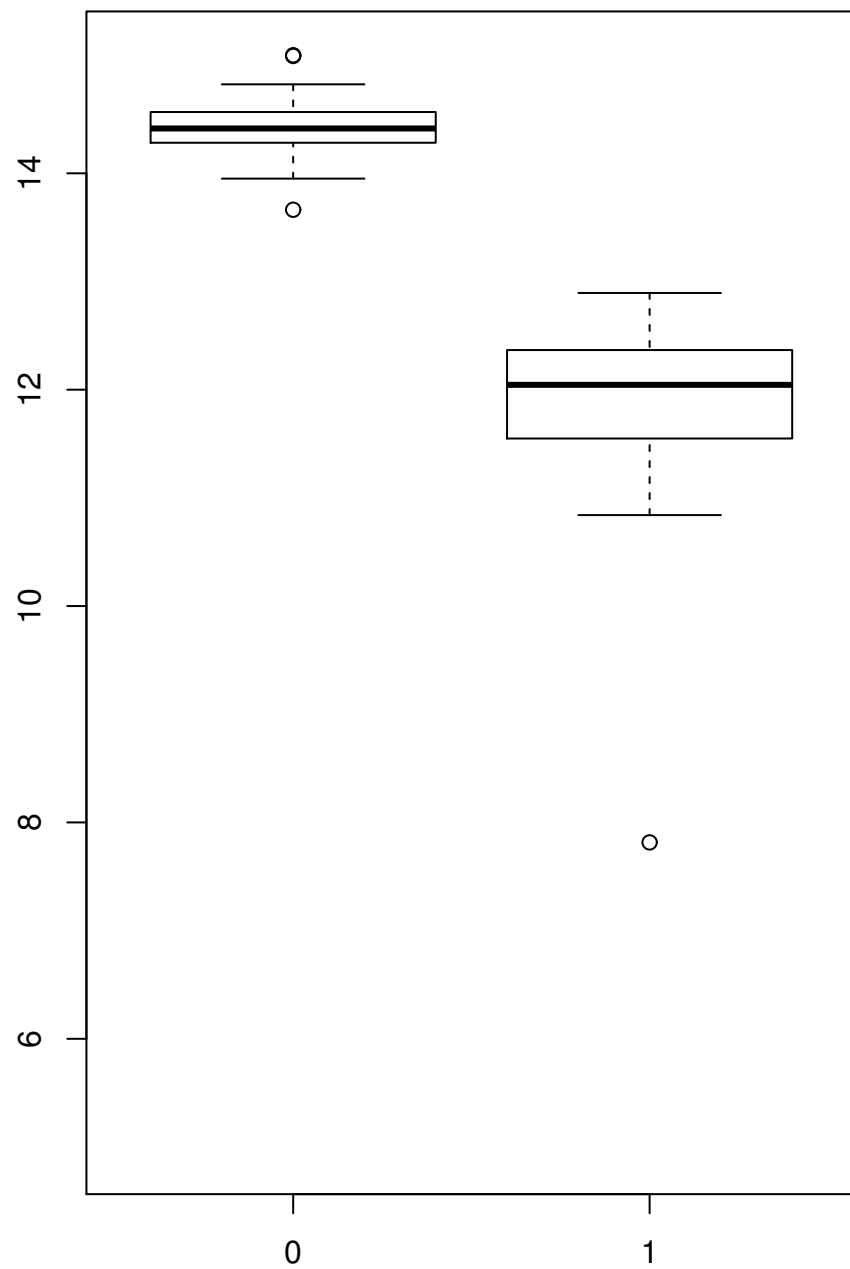

**hsa-miR-122  
(GSE67139)**

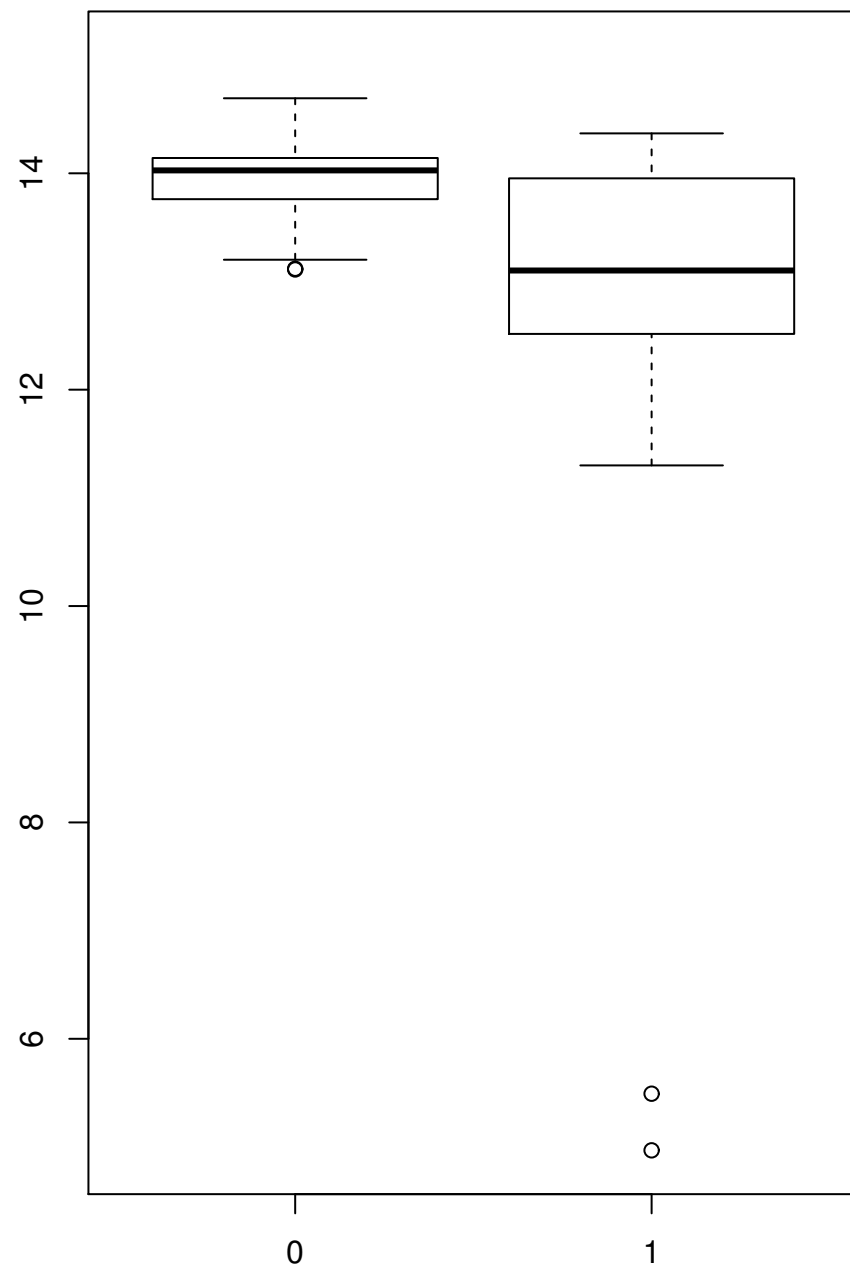

**hsa-miR-1234  
(GSE67138)**

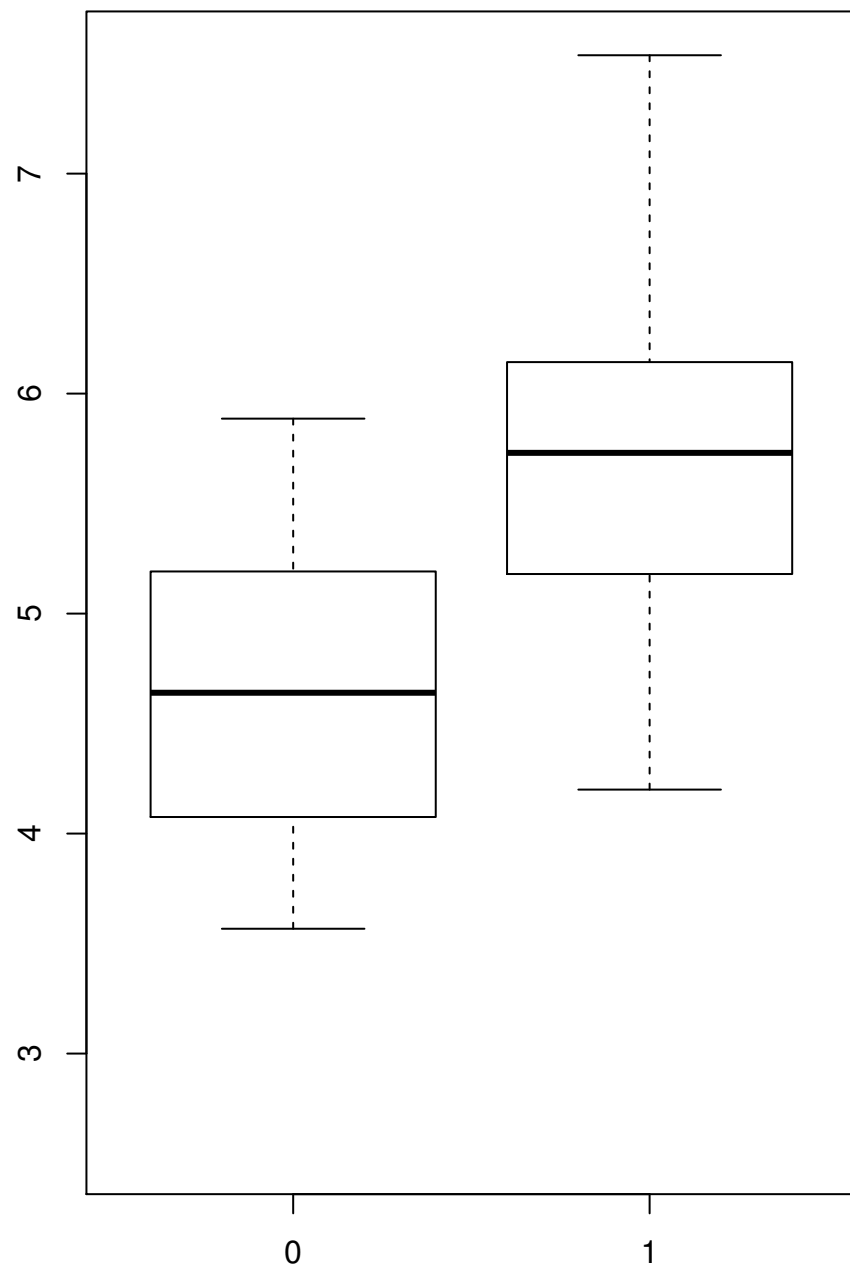

**hsa-miR-1234  
(GSE67139)**

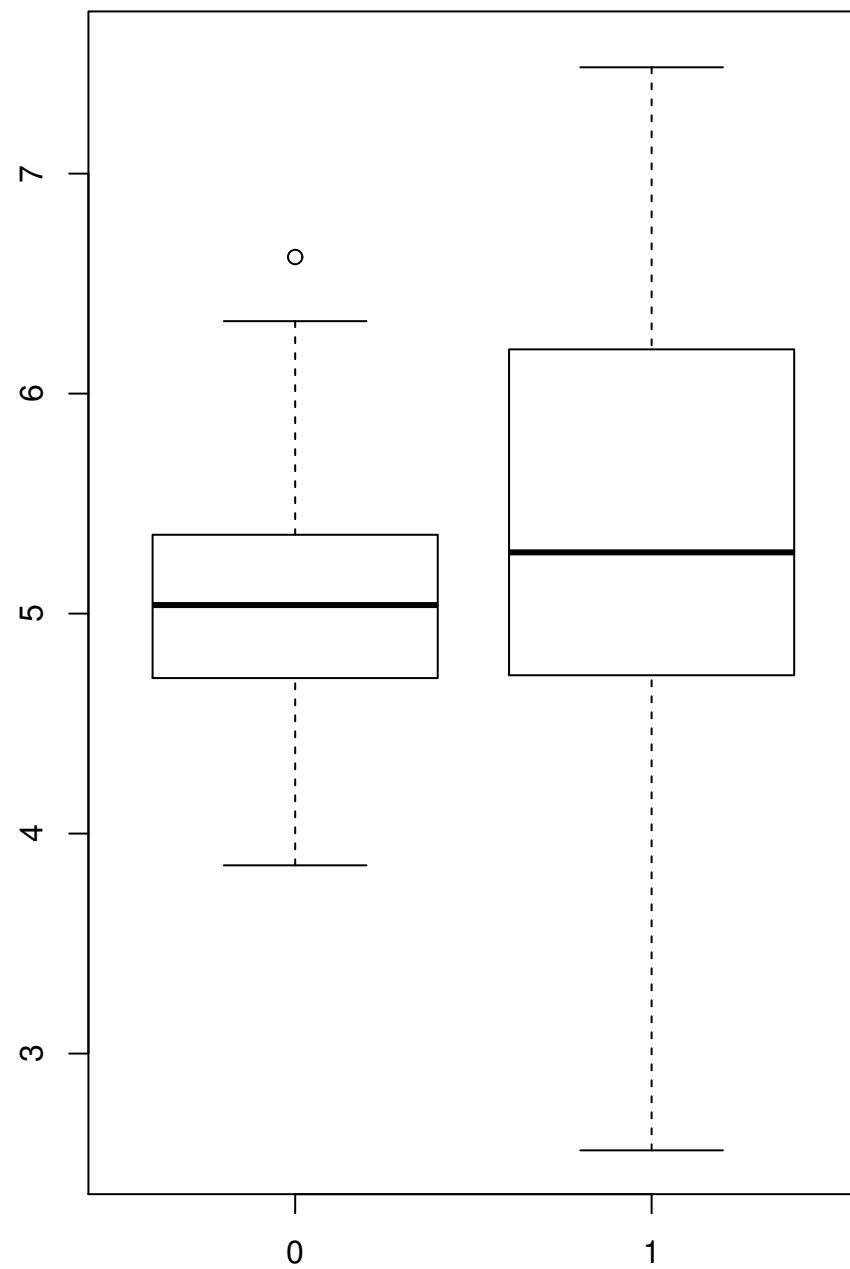

**hsa-miR-125b  
(GSE67138)**

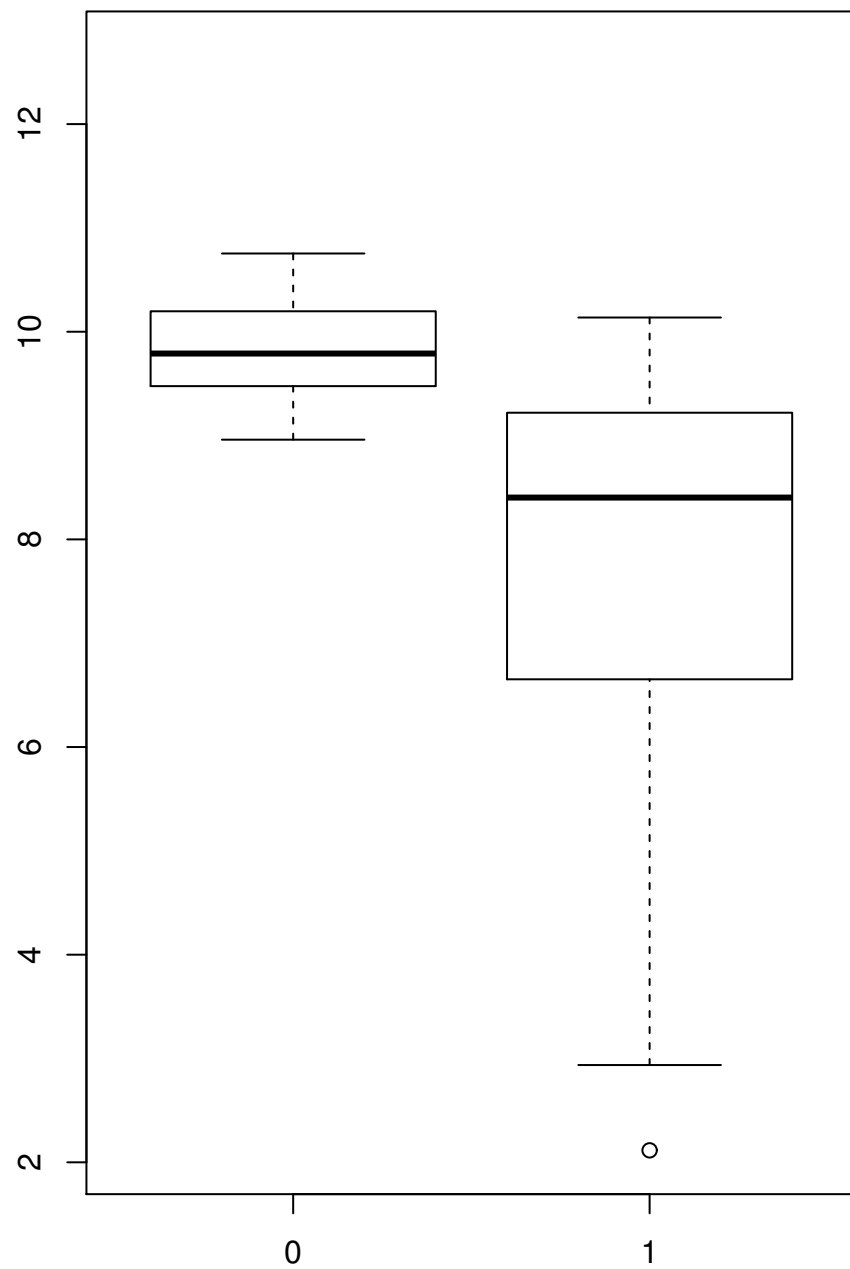

**hsa-miR-125b  
(GSE67139)**

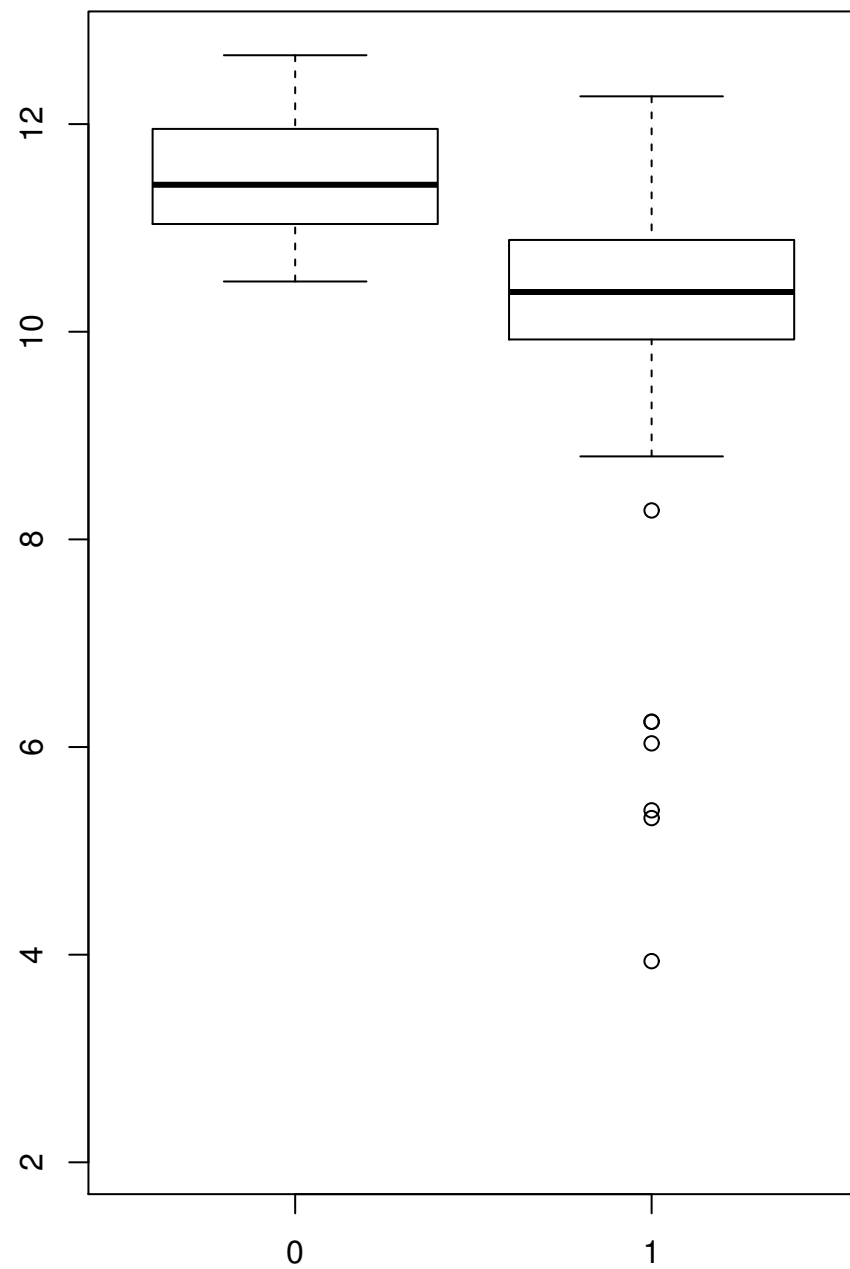

**hsa-miR-126  
(GSE67138)**

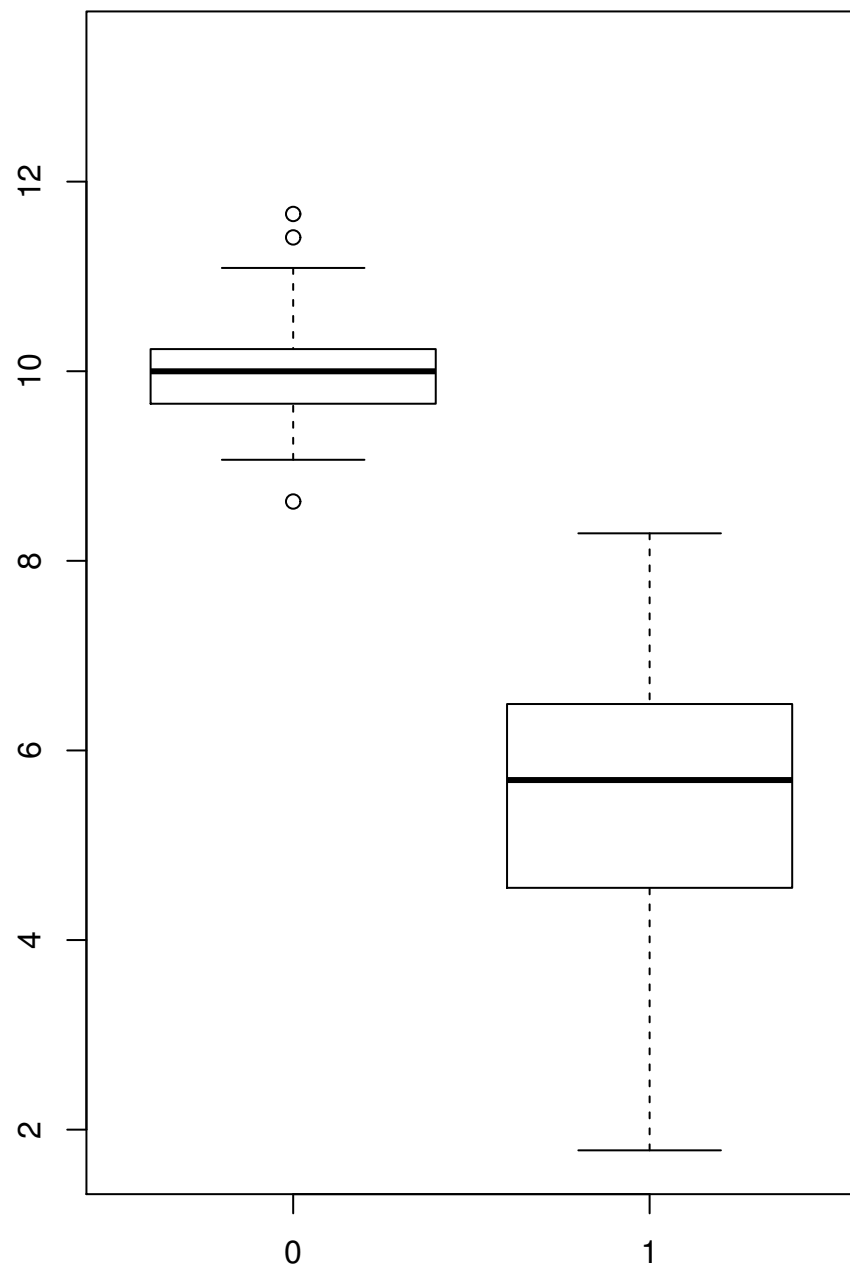

**hsa-miR-126  
(GSE67139)**

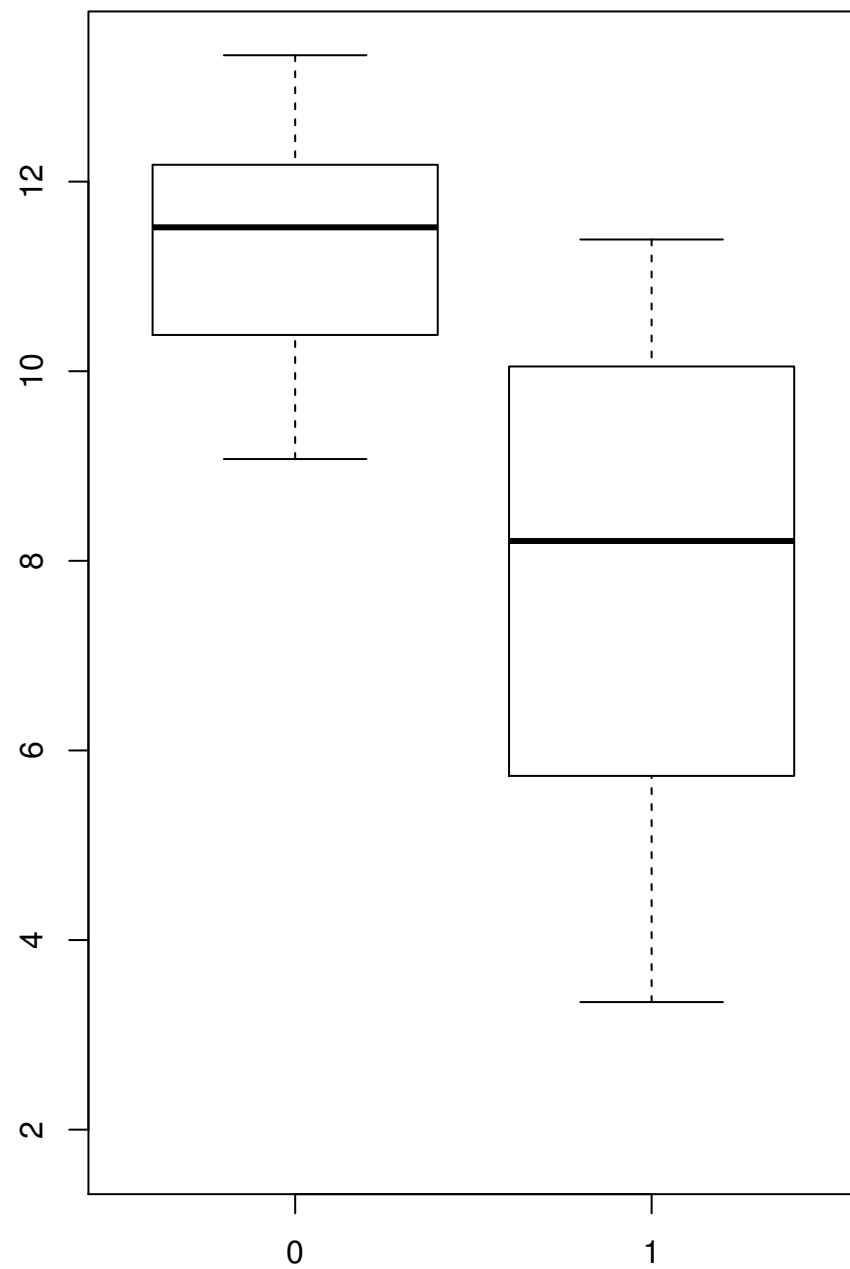

**hsa-miR-1275  
(GSE67138)**

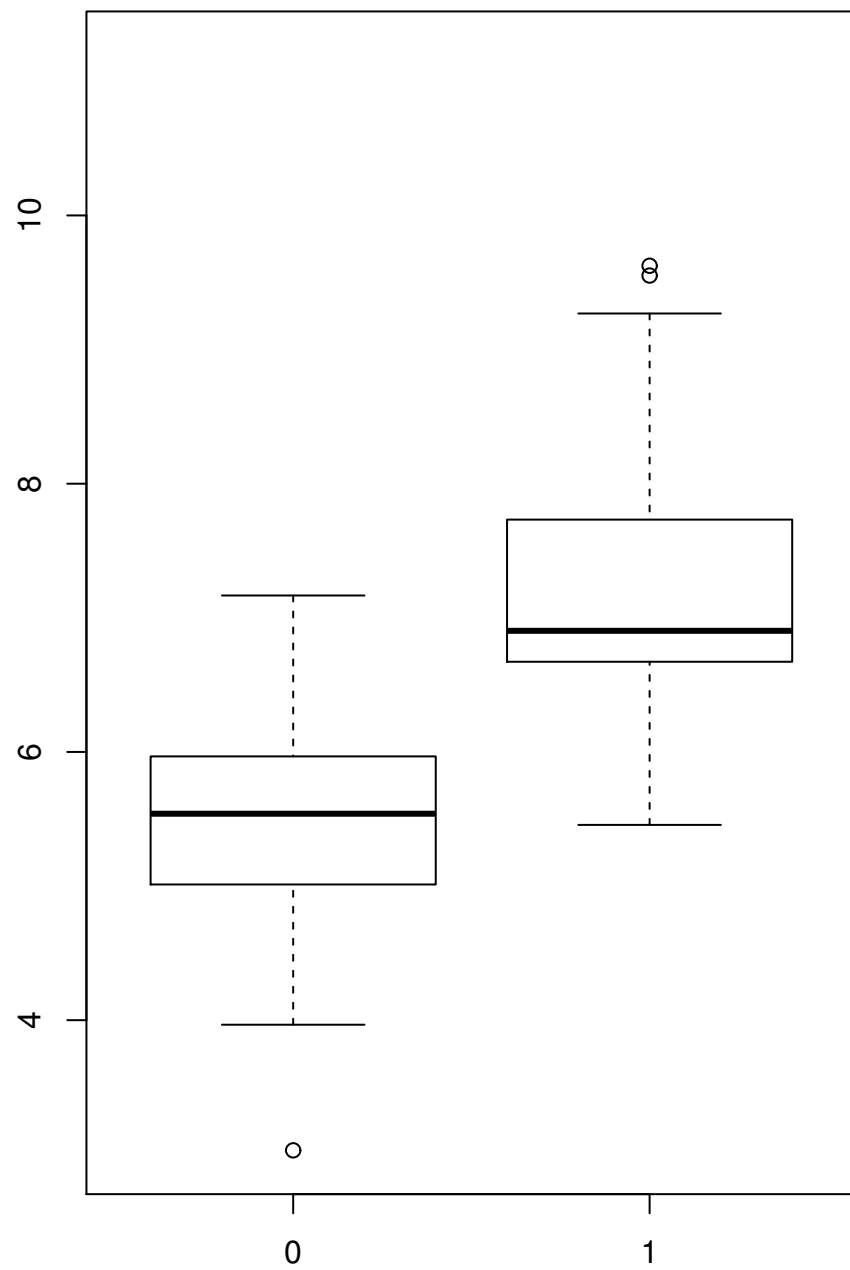

**hsa-miR-1275  
(GSE67139)**

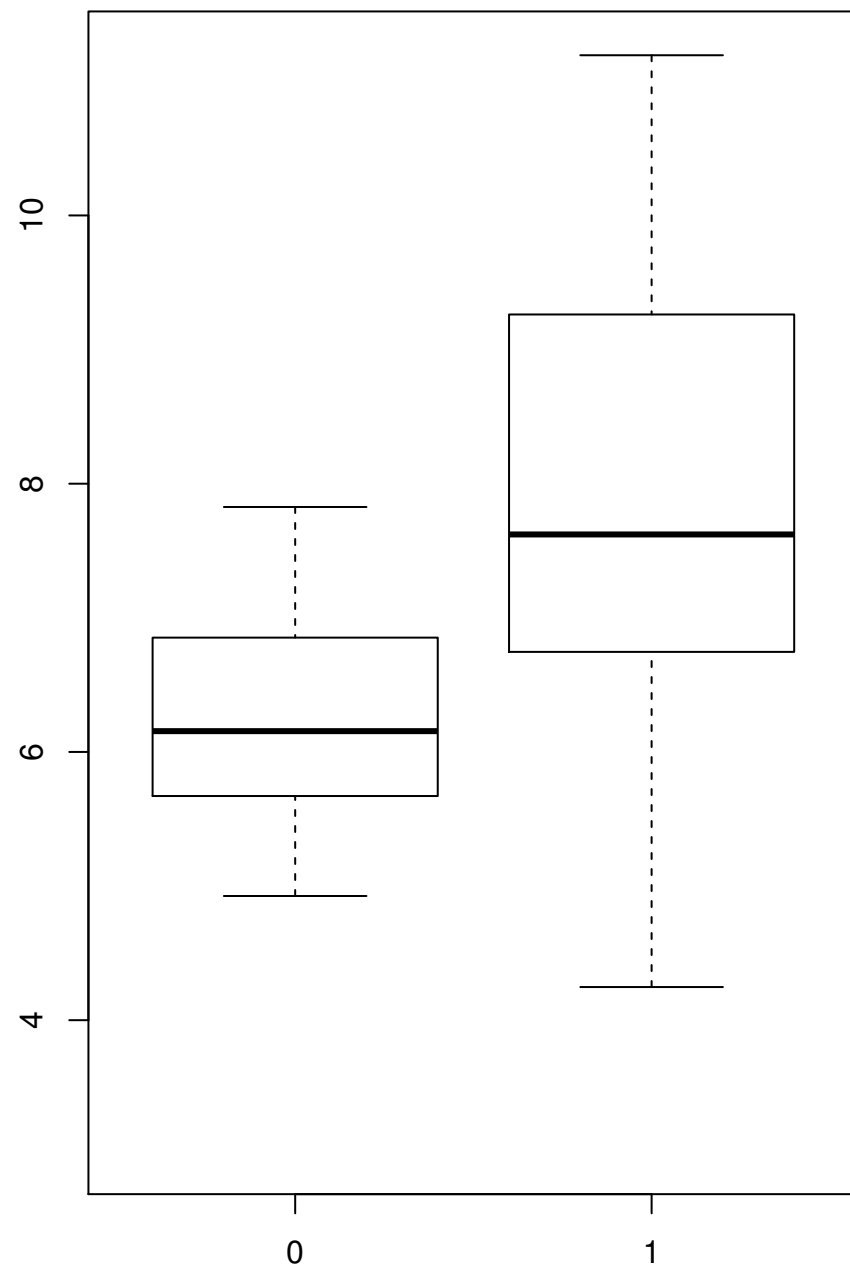

**hsa-miR-1281  
(GSE67138)**

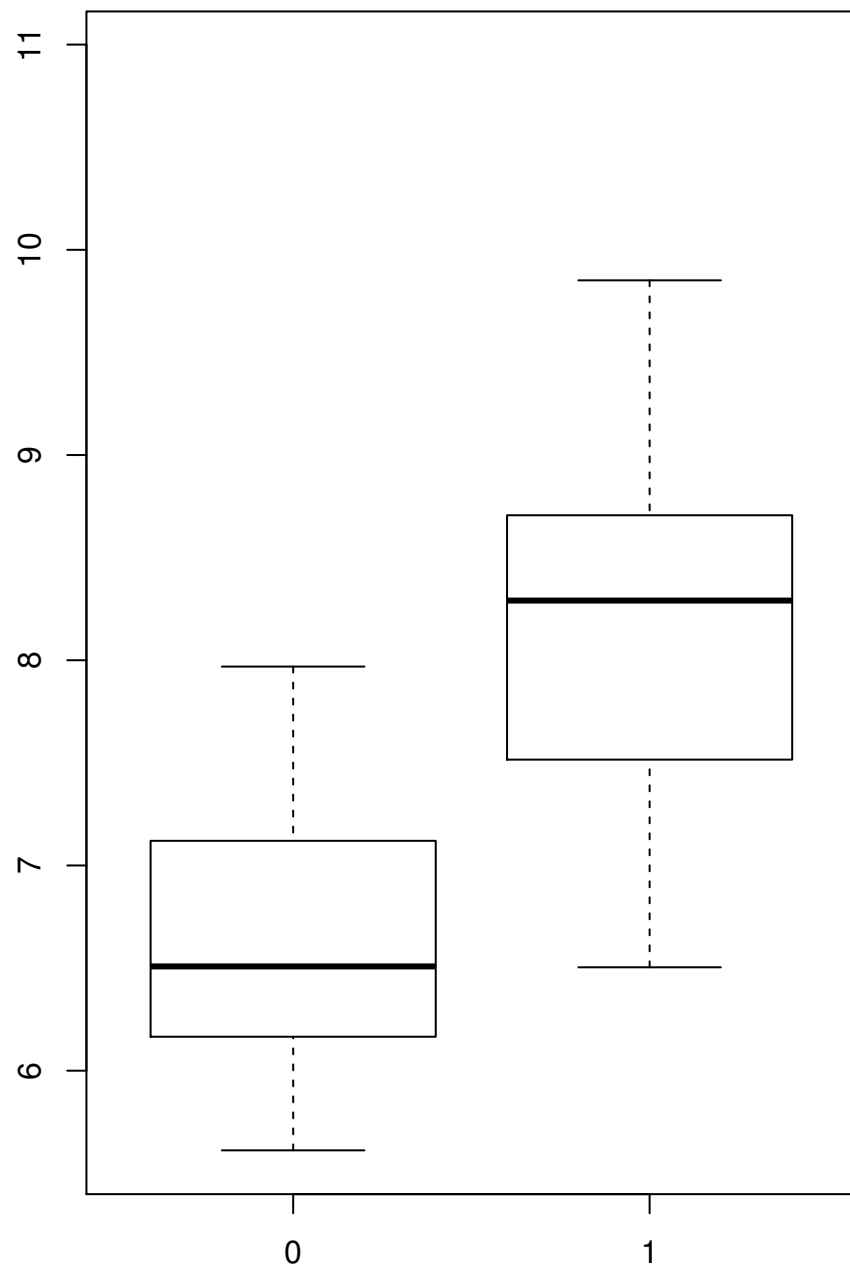

**hsa-miR-1281  
(GSE67139)**

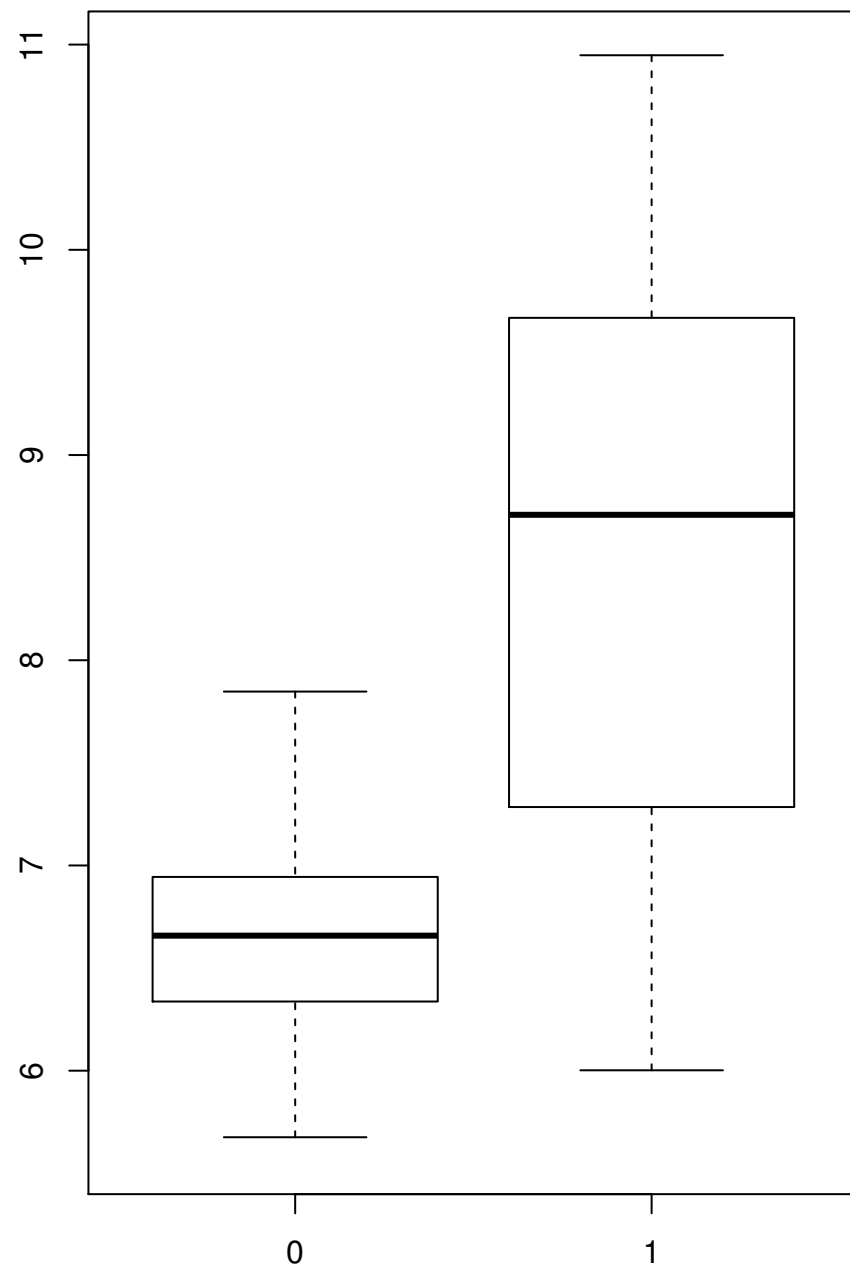



**hsa-miR-1307  
(GSE67138)**

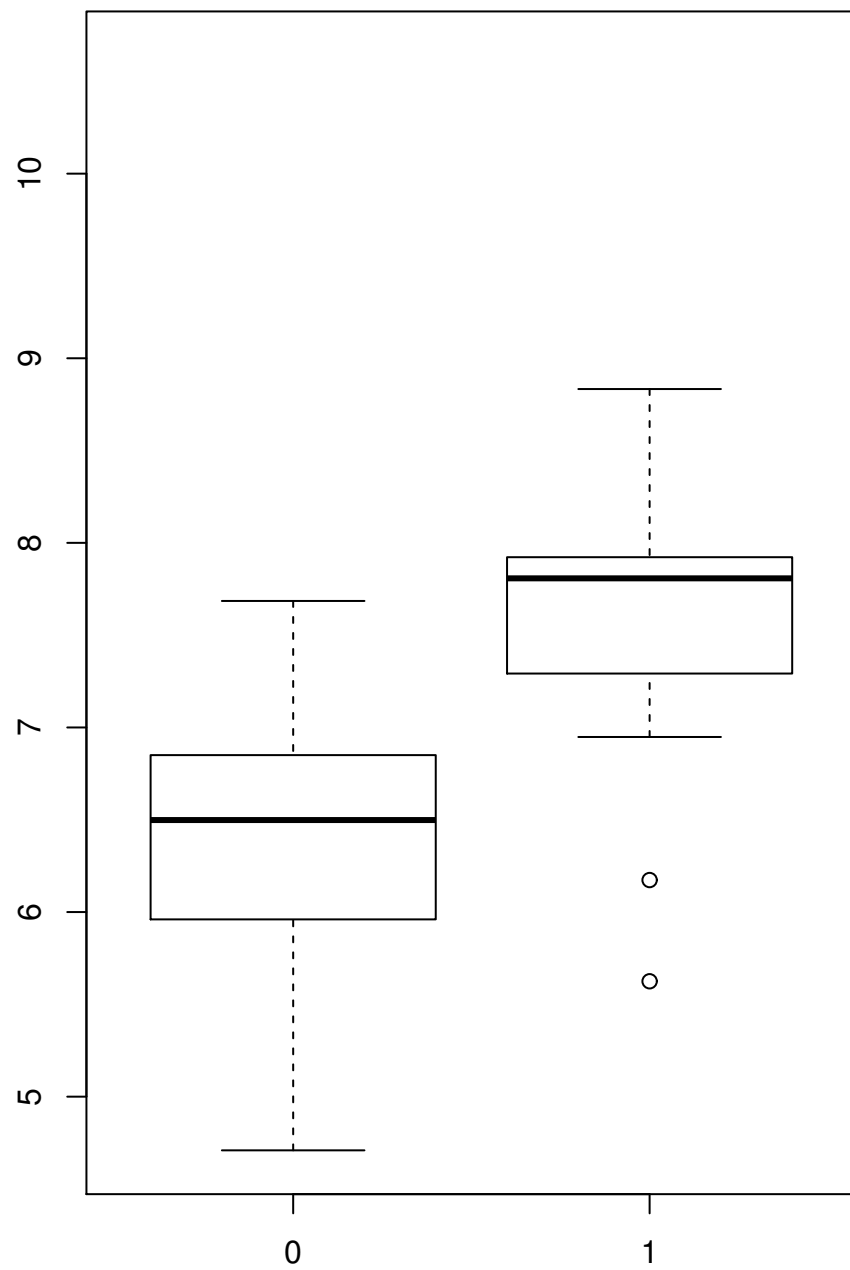

**hsa-miR-1307  
(GSE67139)**

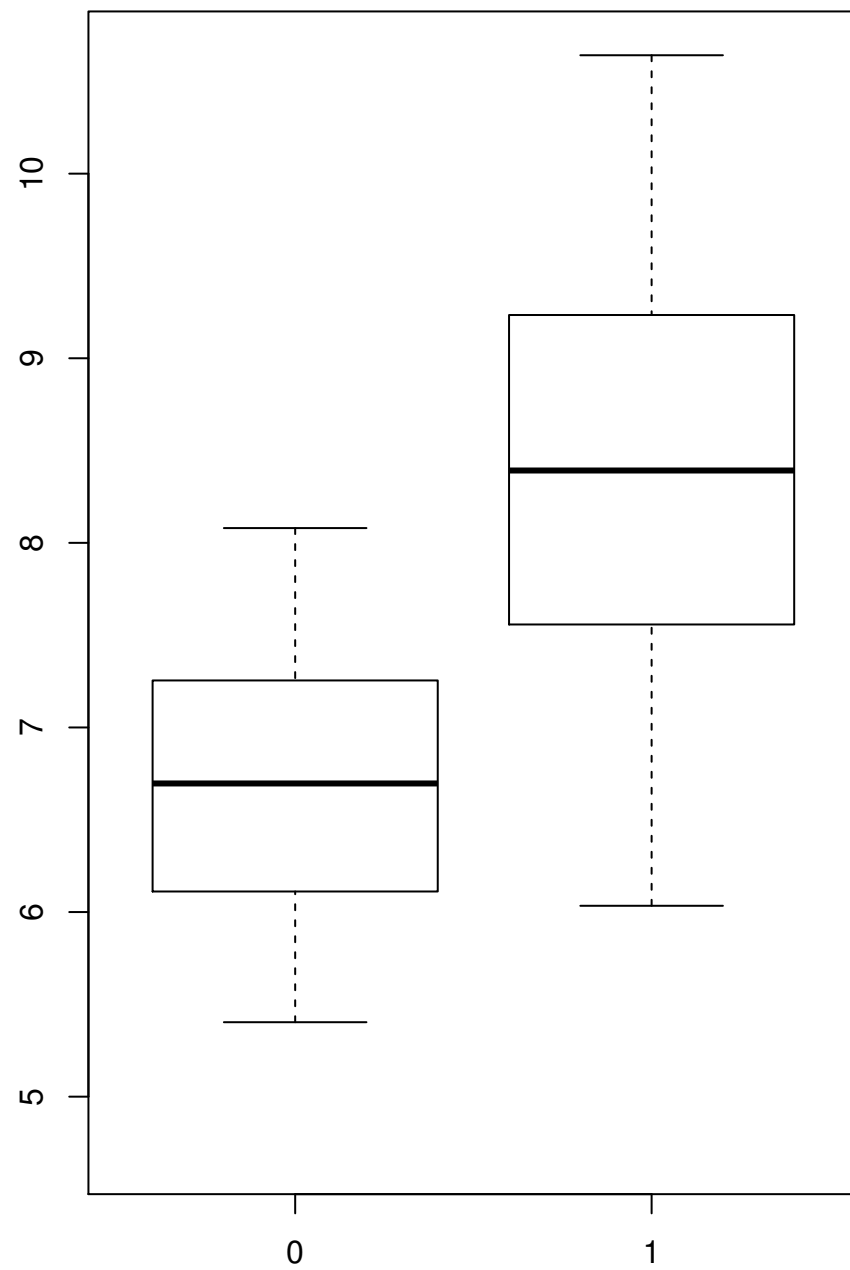

**hsa-miR-138-1-star  
(GSE67138)**

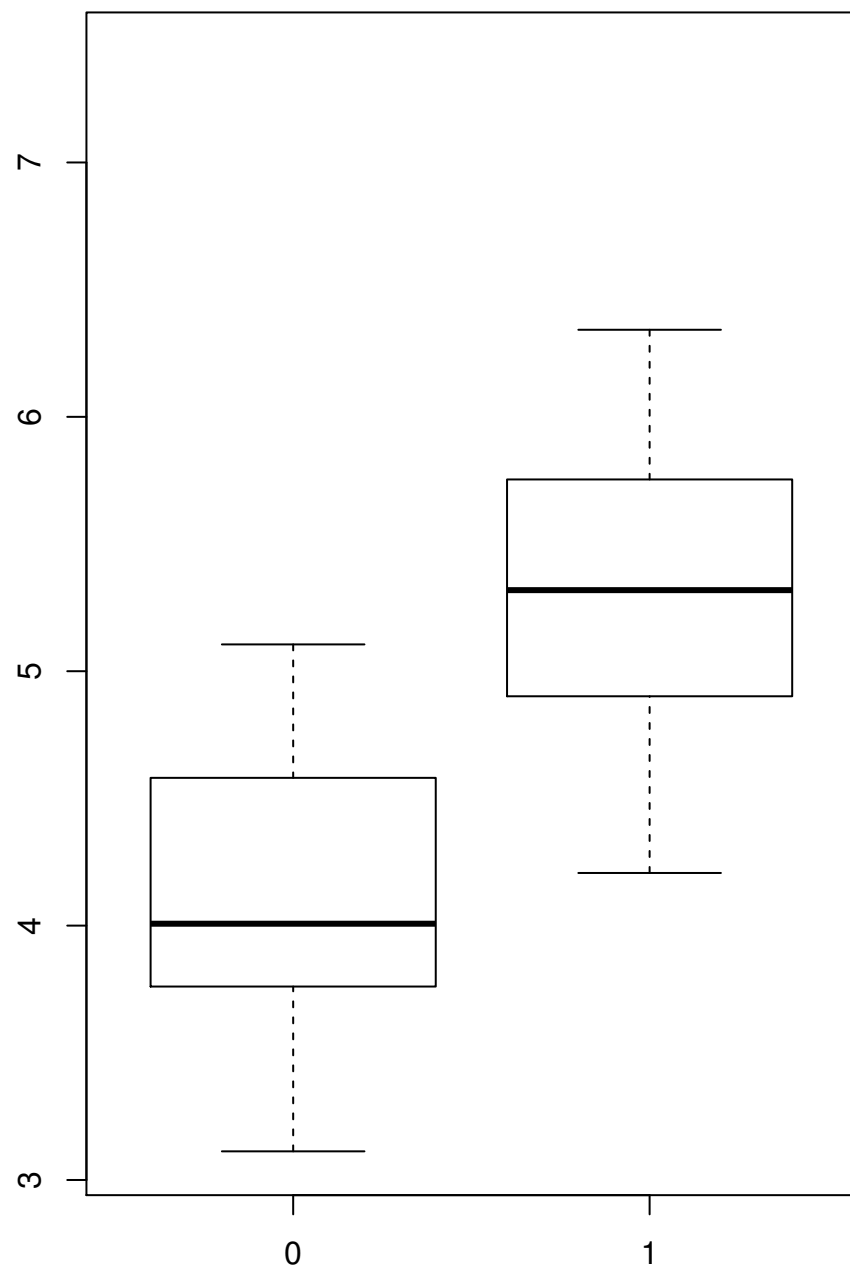

**hsa-miR-138-1-star  
(GSE67139)**

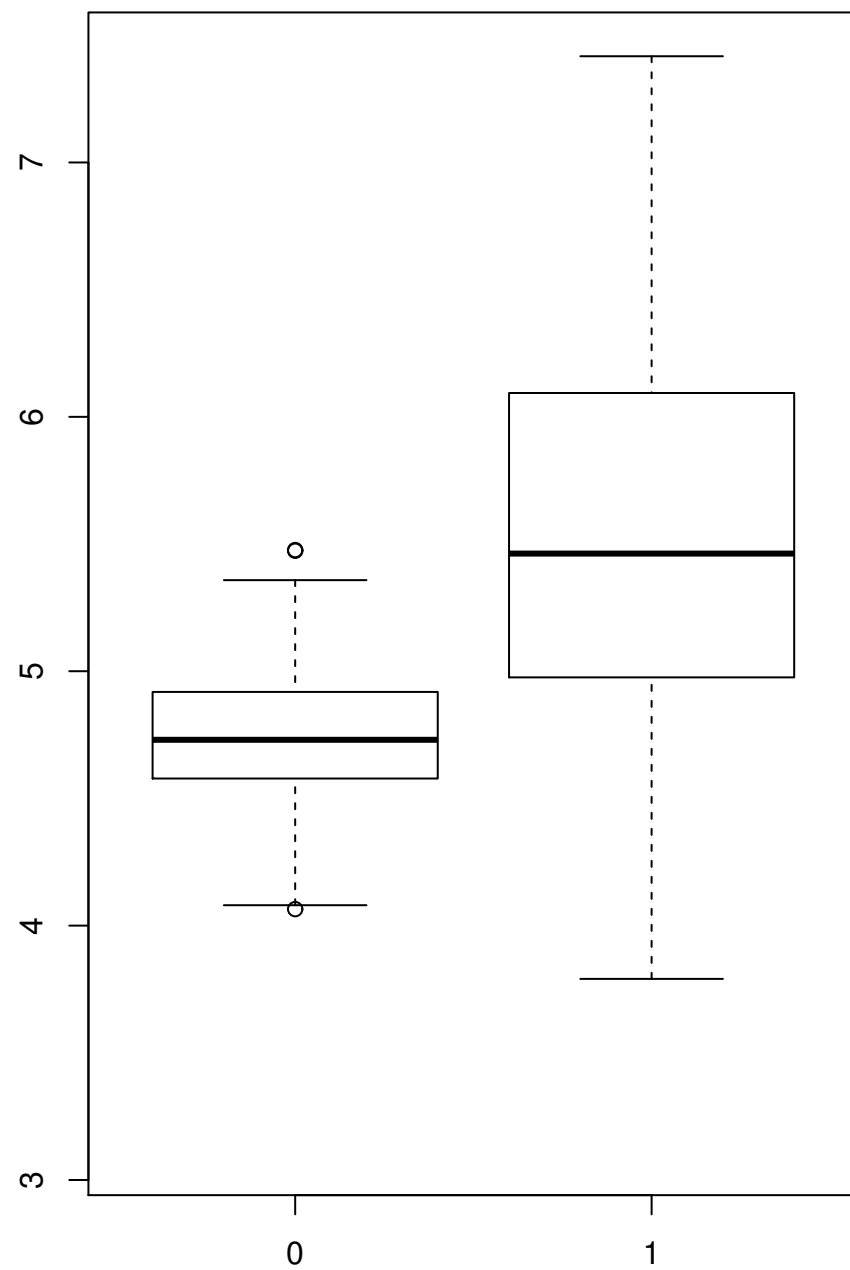

**hsa-miR-143  
(GSE67138)**

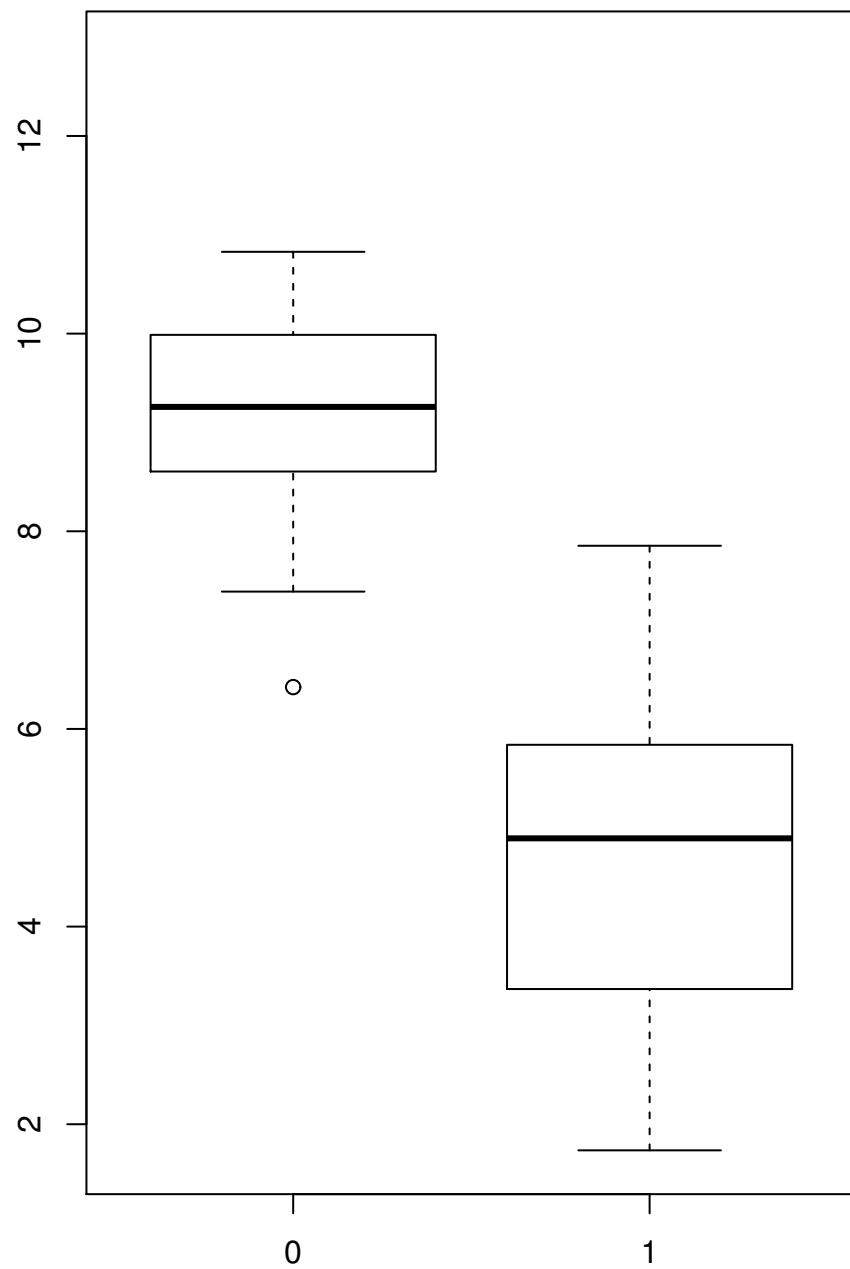

**hsa-miR-143  
(GSE67139)**

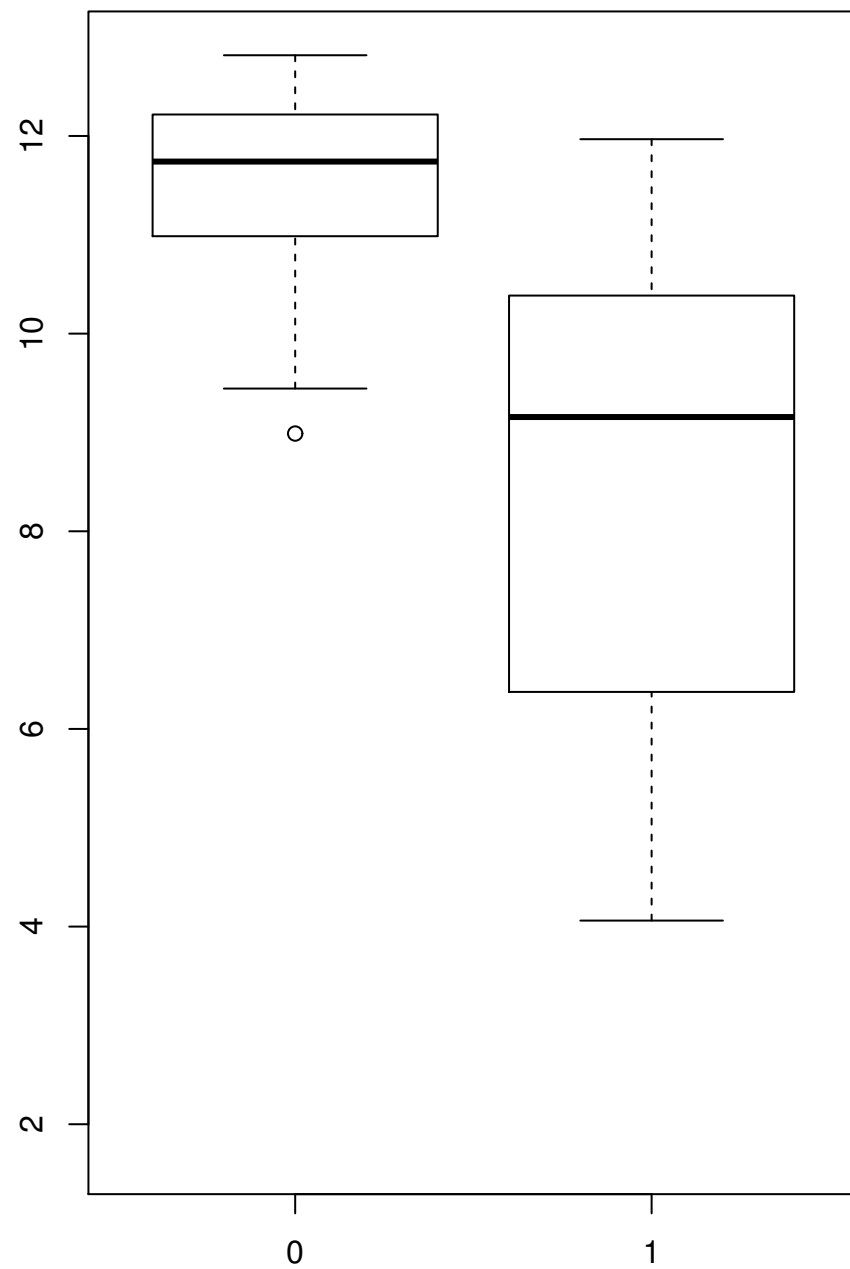

**hsa-miR-150-star  
(GSE67138)**

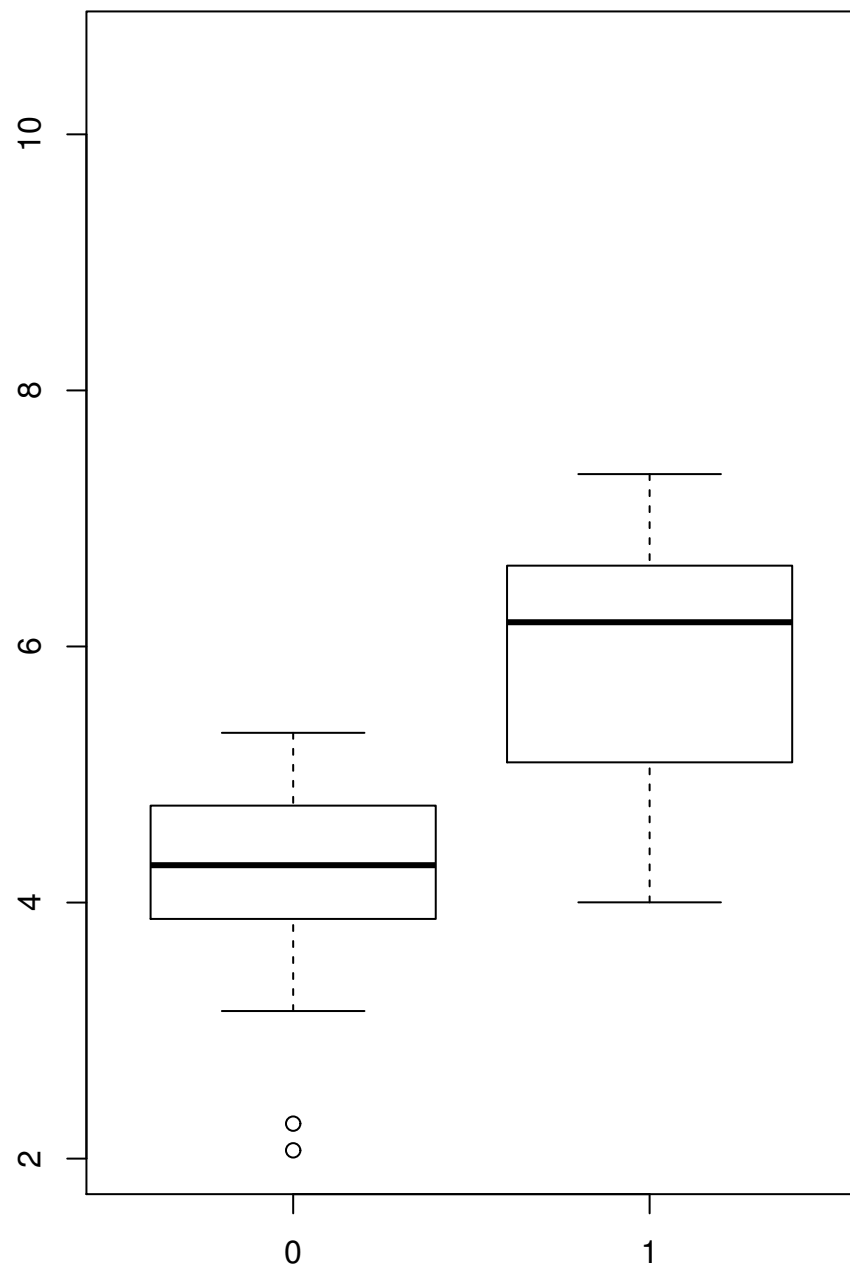

**hsa-miR-150-star  
(GSE67139)**

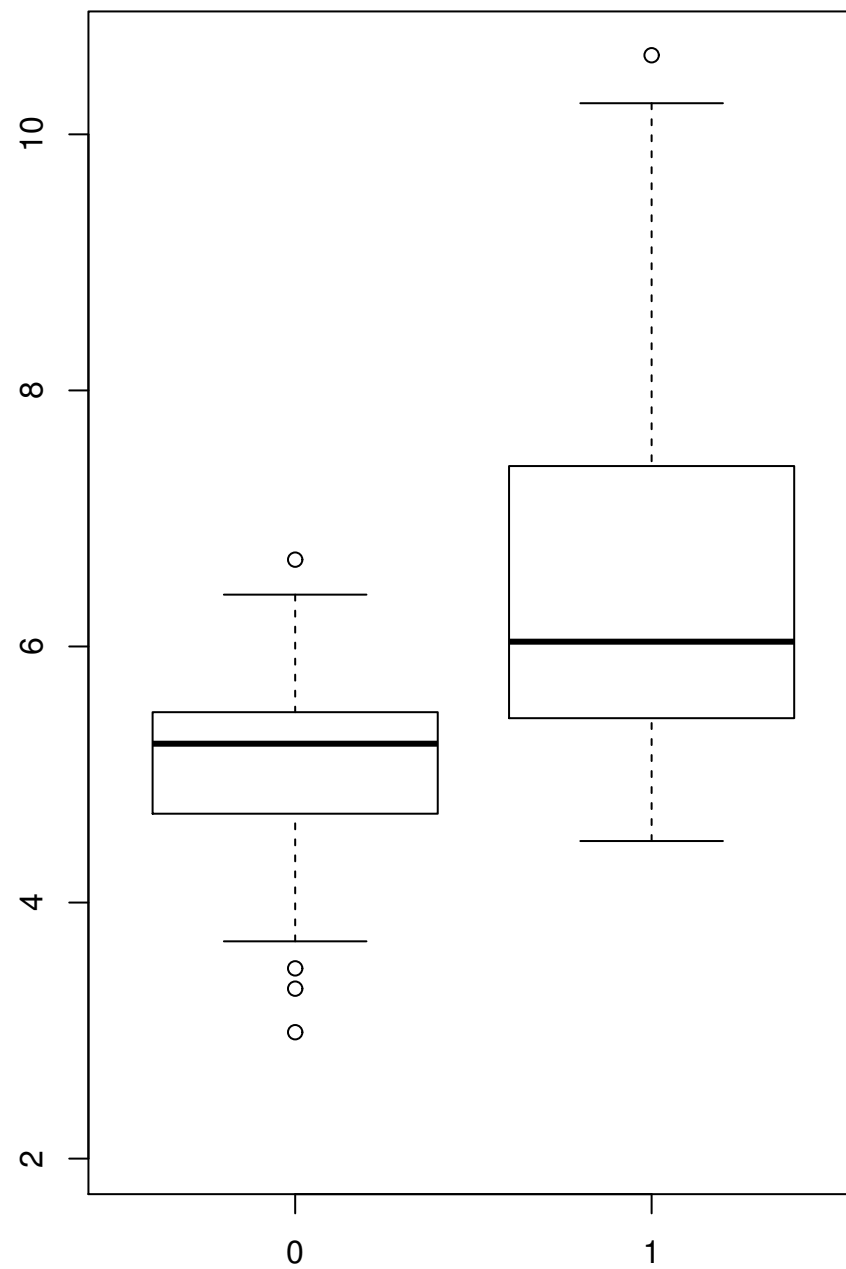

**hsa-miR-150  
(GSE67138)**

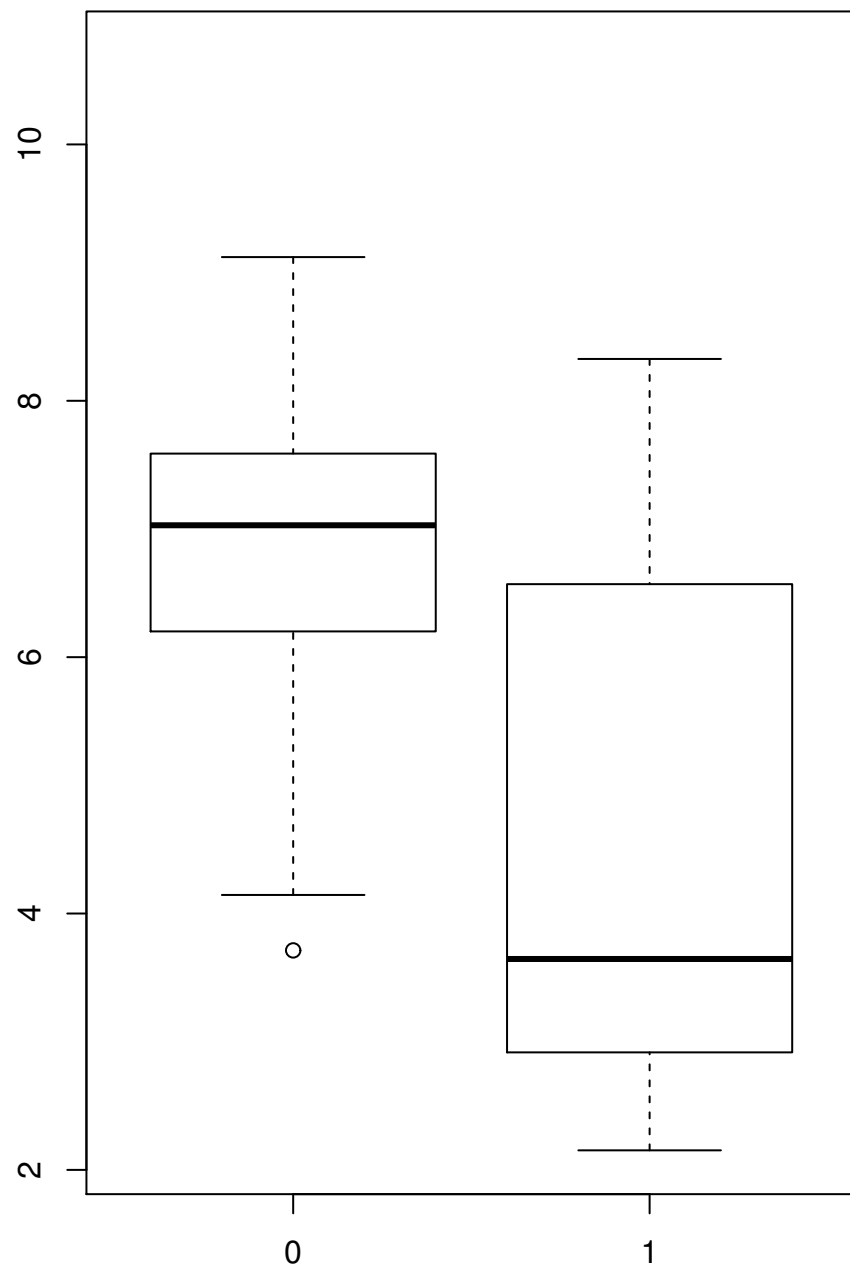

**hsa-miR-150  
(GSE67139)**

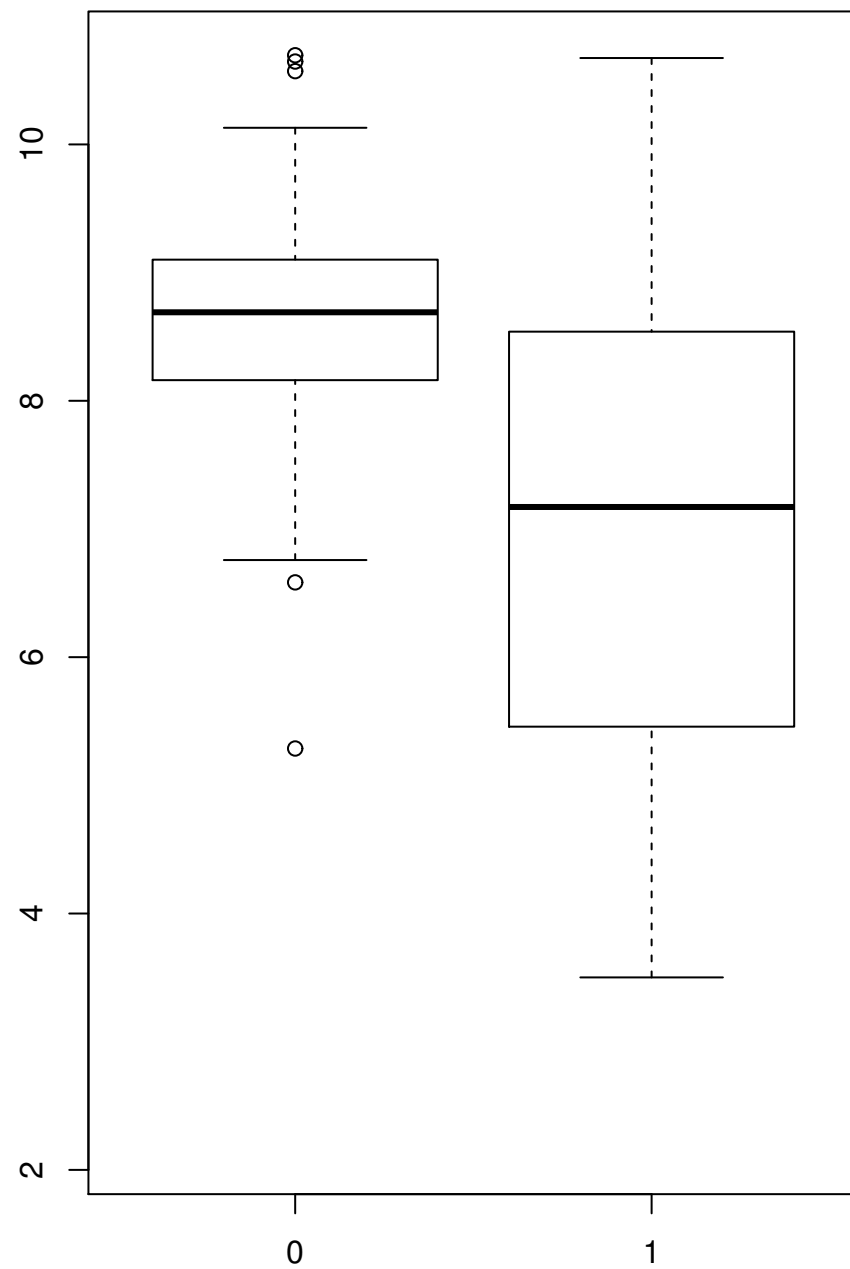

**hsa-miR-151-3p  
(GSE67138)**

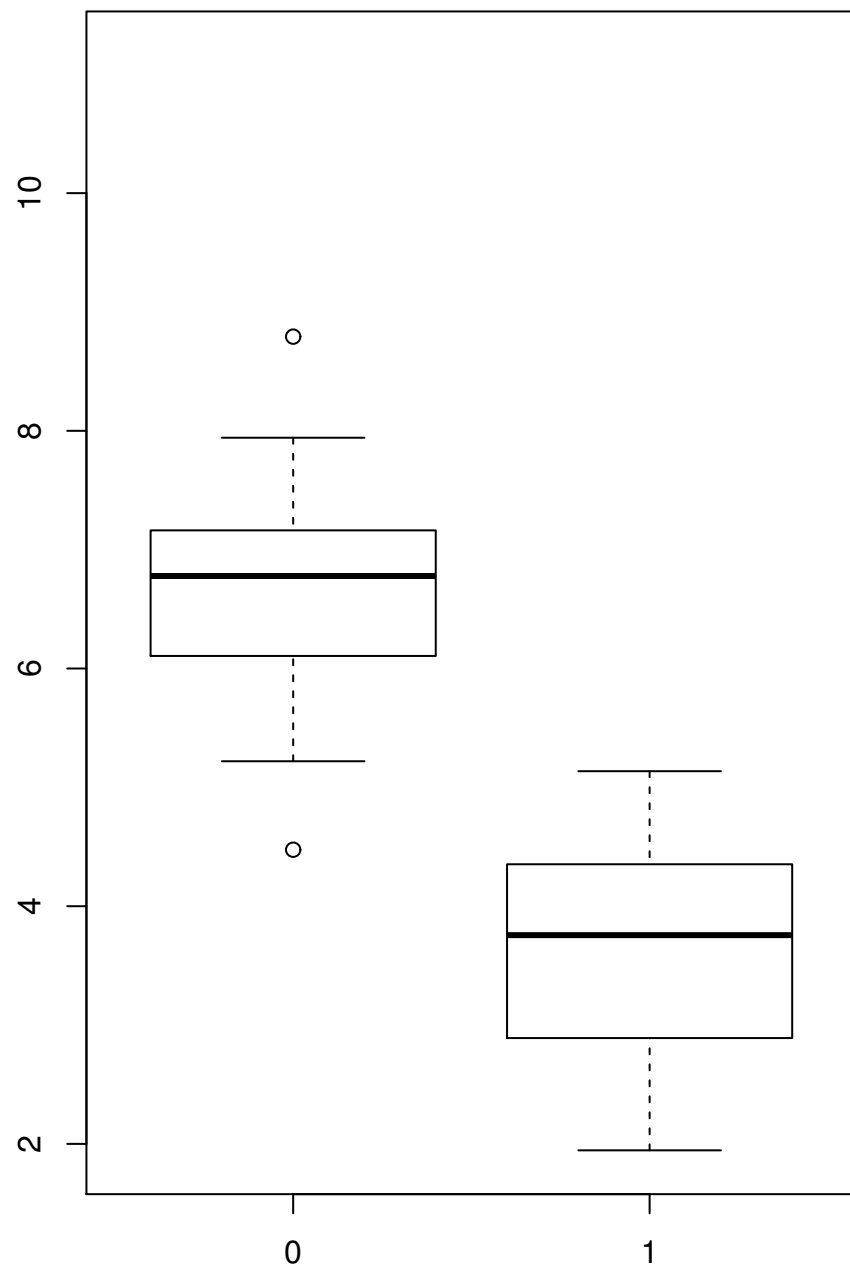

**hsa-miR-151-3p  
(GSE67139)**

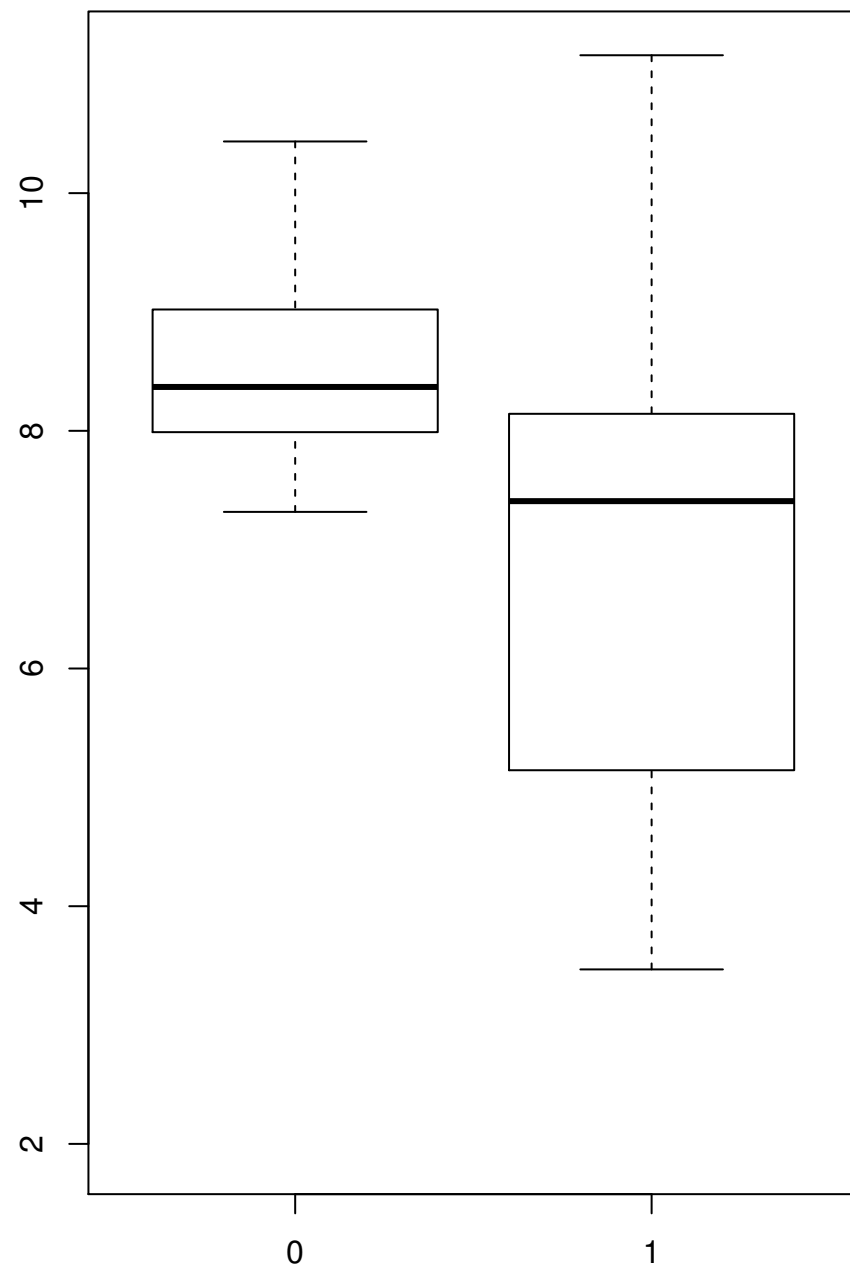

**hsa-miR-151-5p  
(GSE67138)**

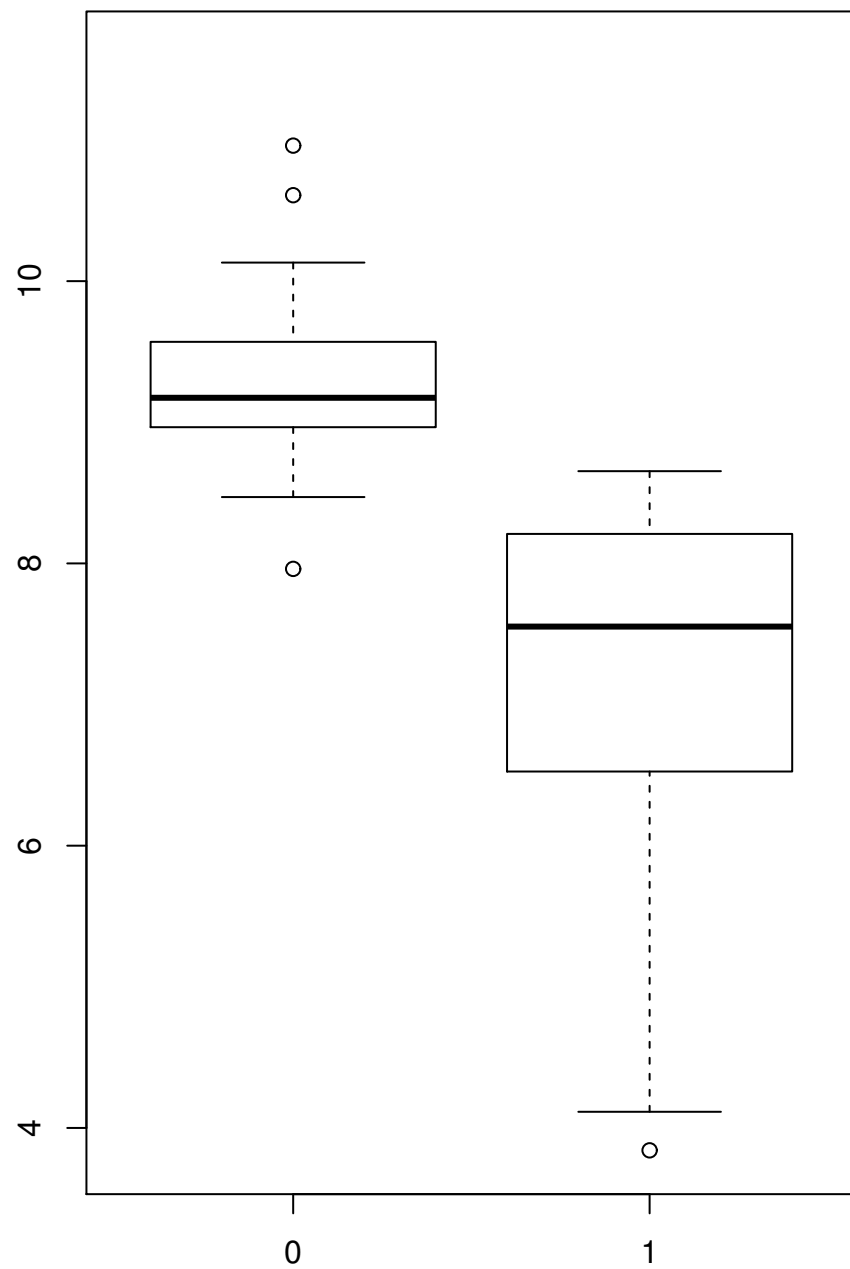

**hsa-miR-151-5p  
(GSE67139)**

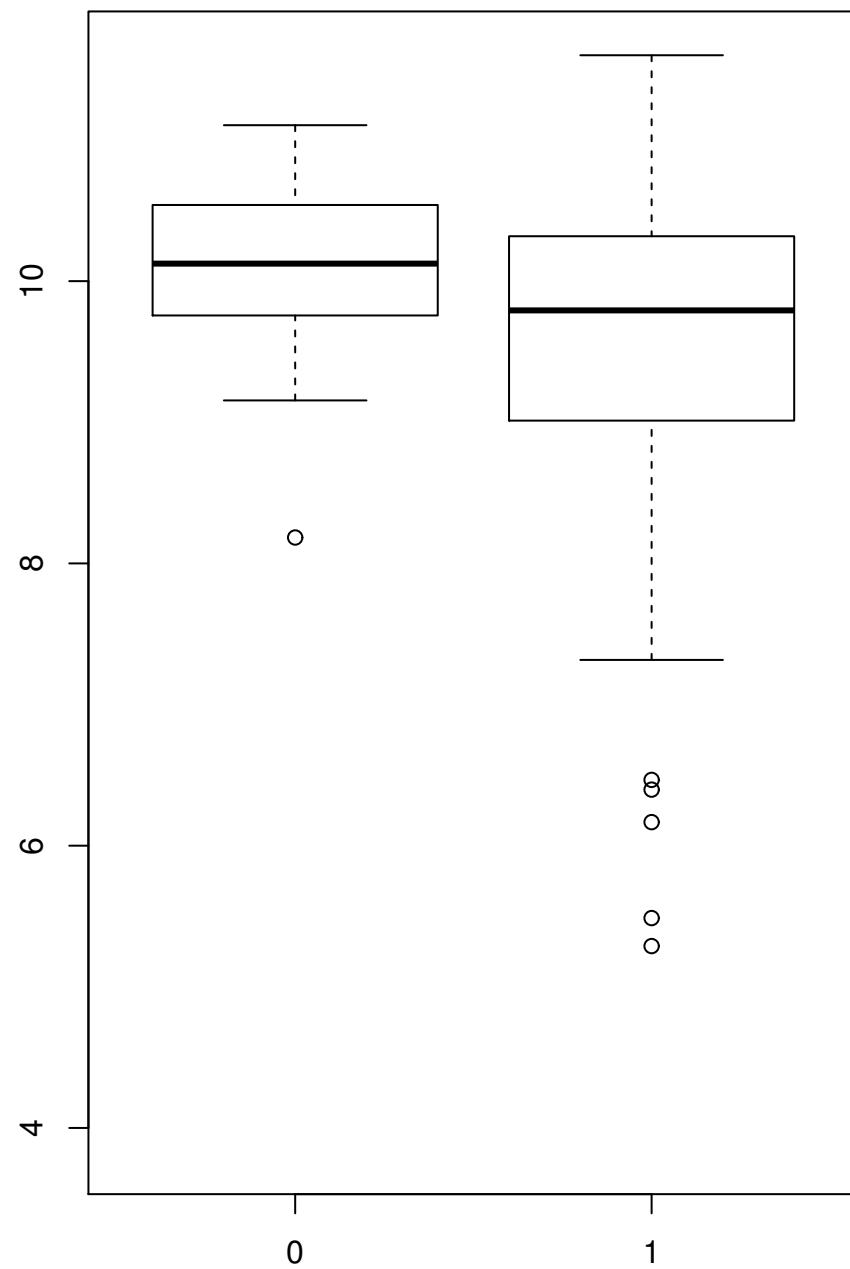

**hsa-miR-155  
(GSE67138)**

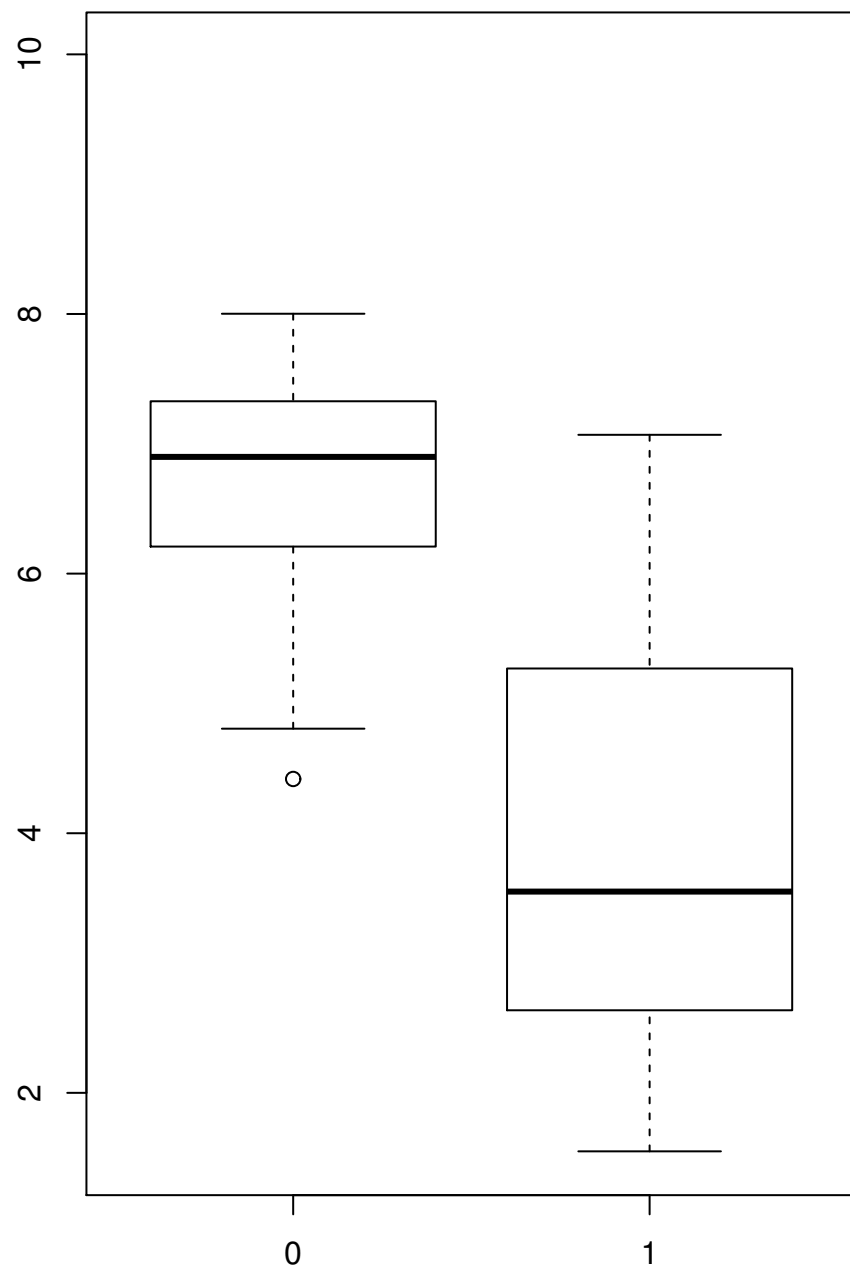

**hsa-miR-155  
(GSE67139)**

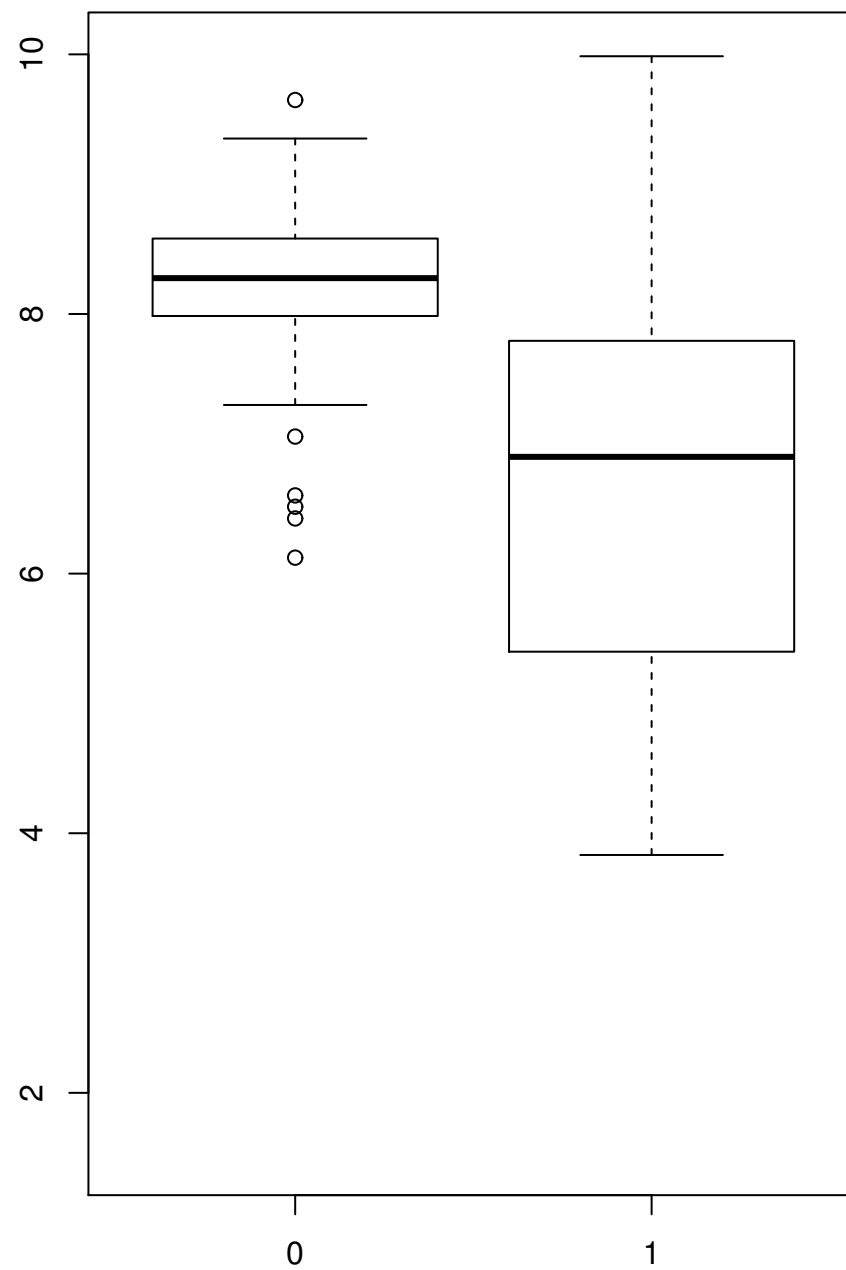



**hsa-miR-17  
(GSE67138)**

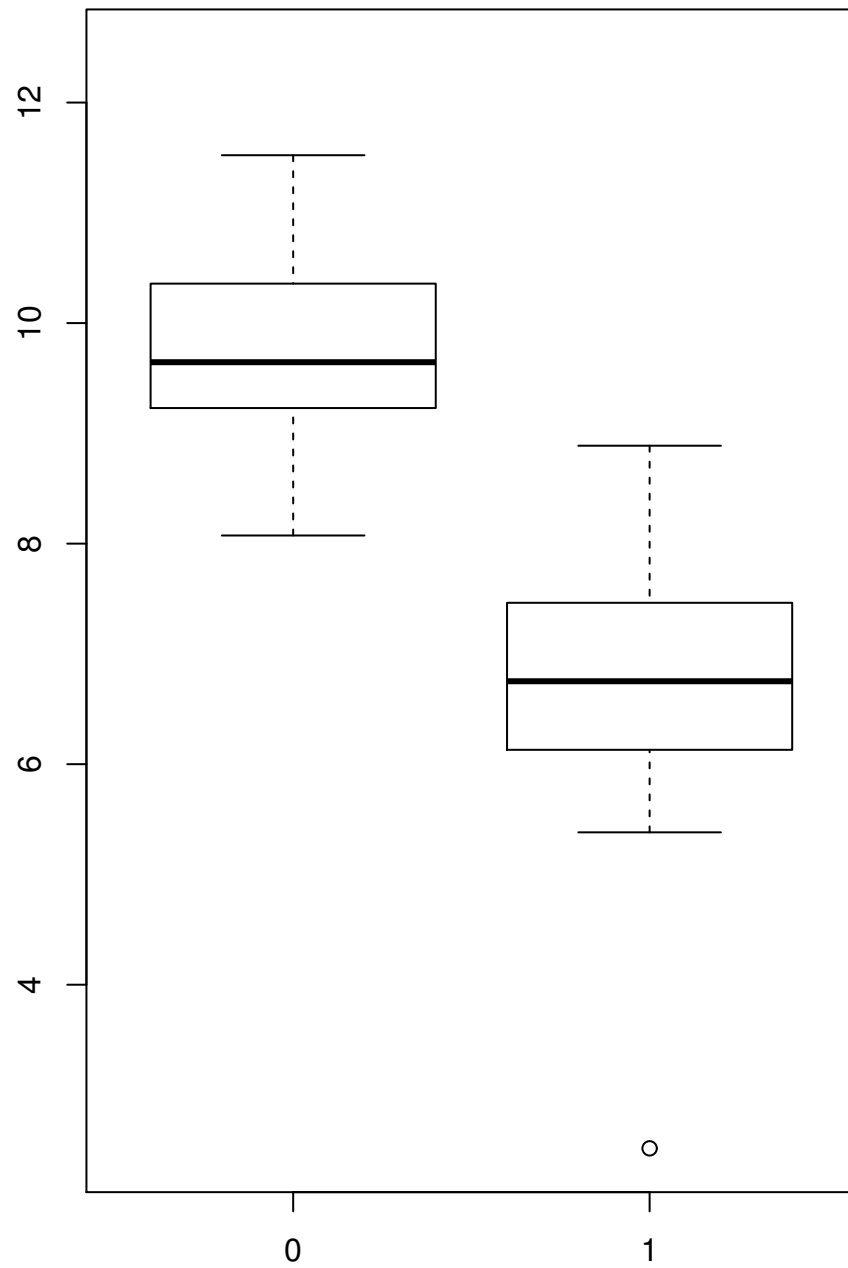

**hsa-miR-17  
(GSE67139)**

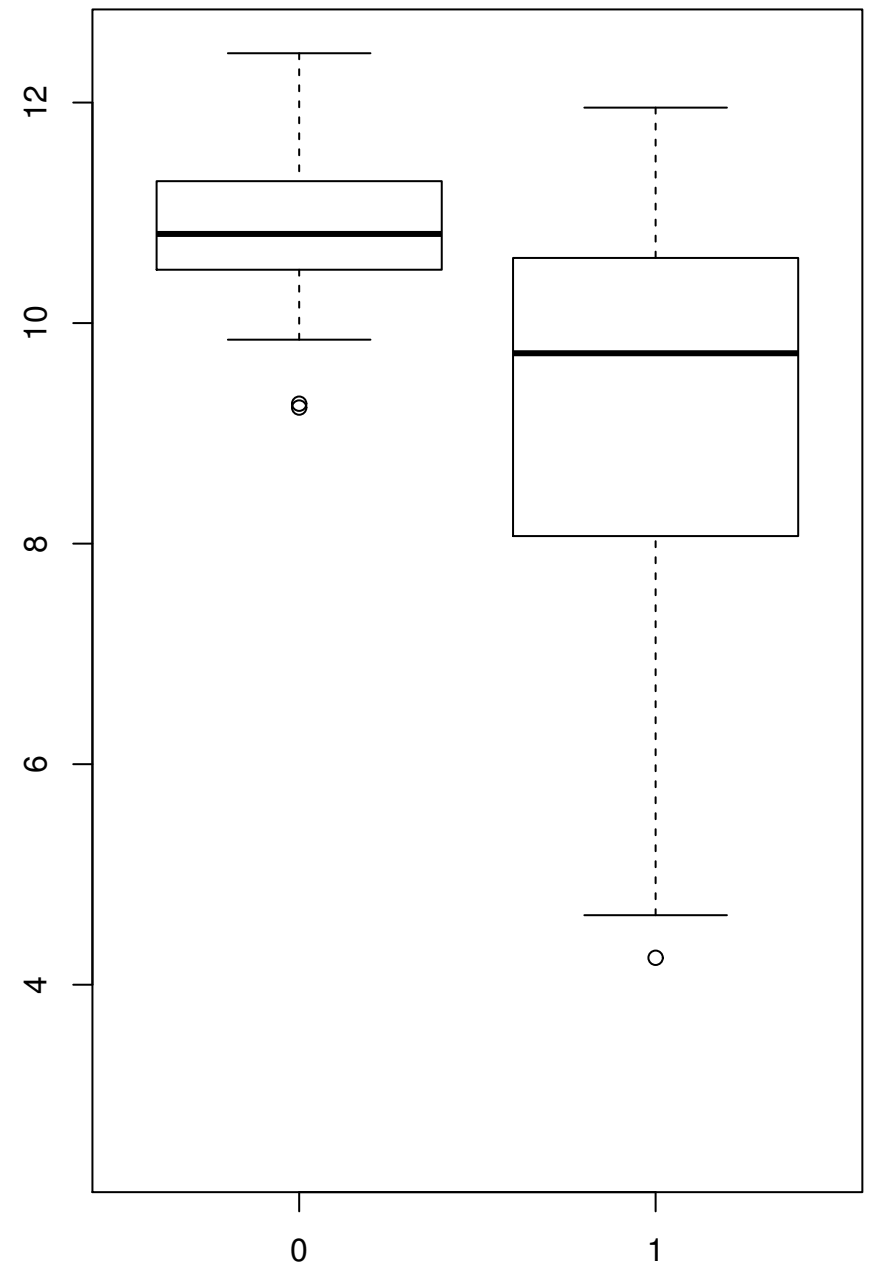

**hsa-miR-181b**  
**(GSE67138)**

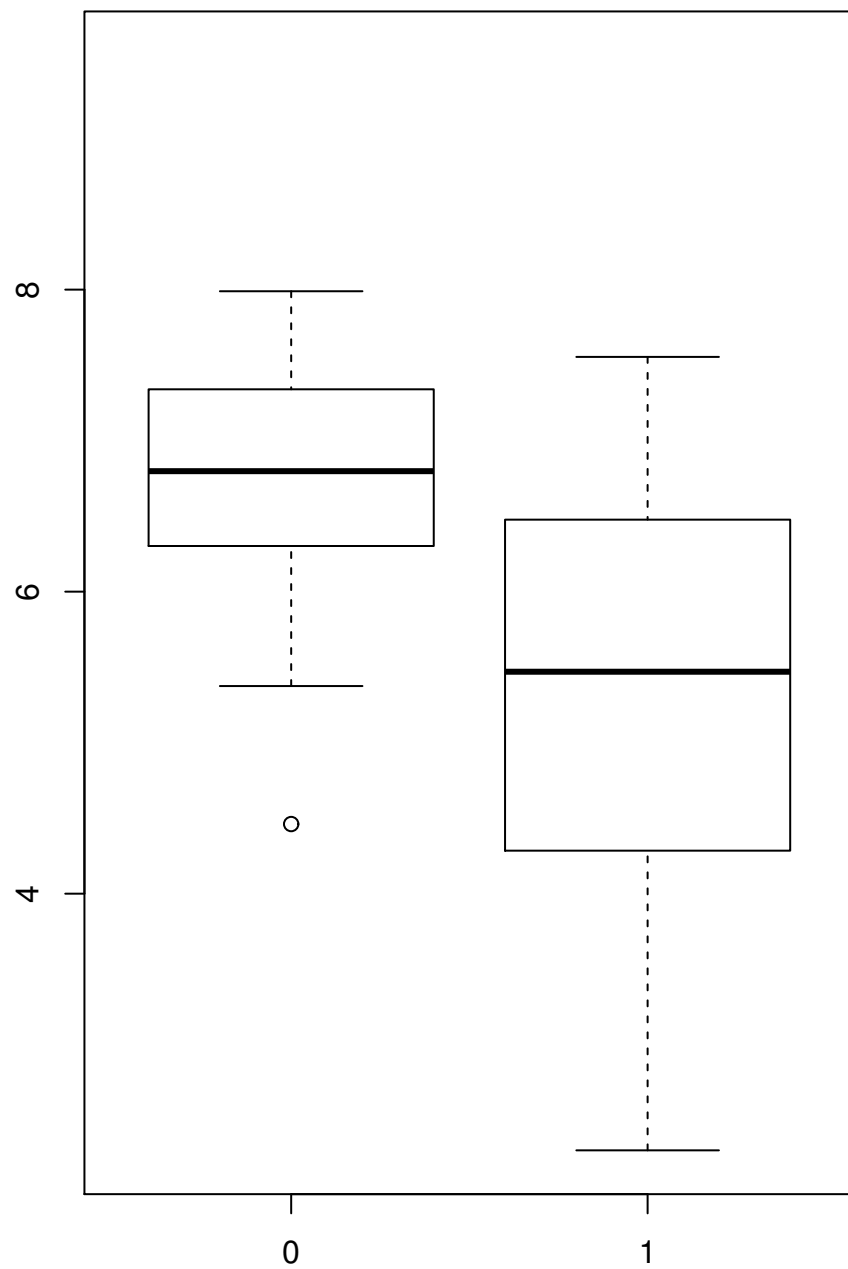

**hsa-miR-181b**  
**(GSE67139)**

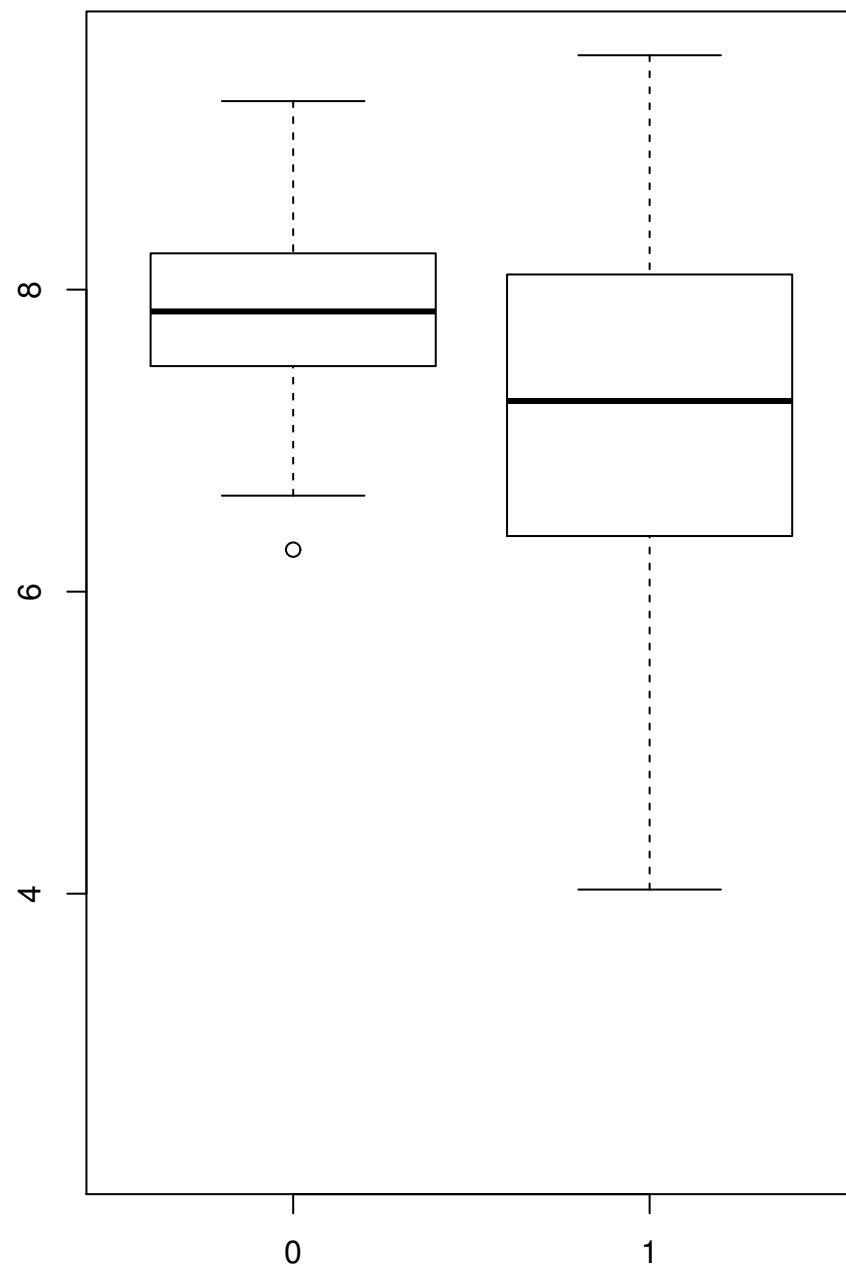

**hsa-miR-185  
(GSE67138)**

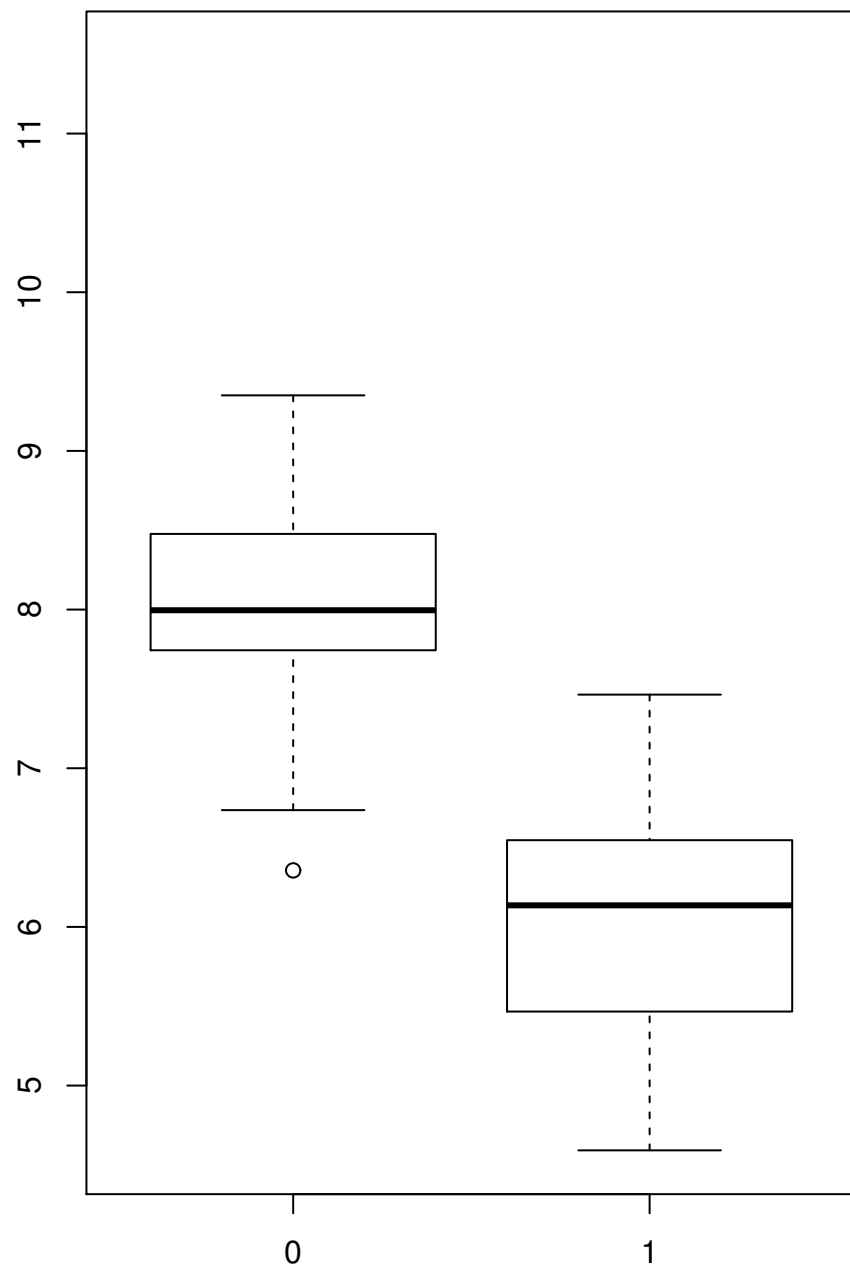

**hsa-miR-185  
(GSE67139)**

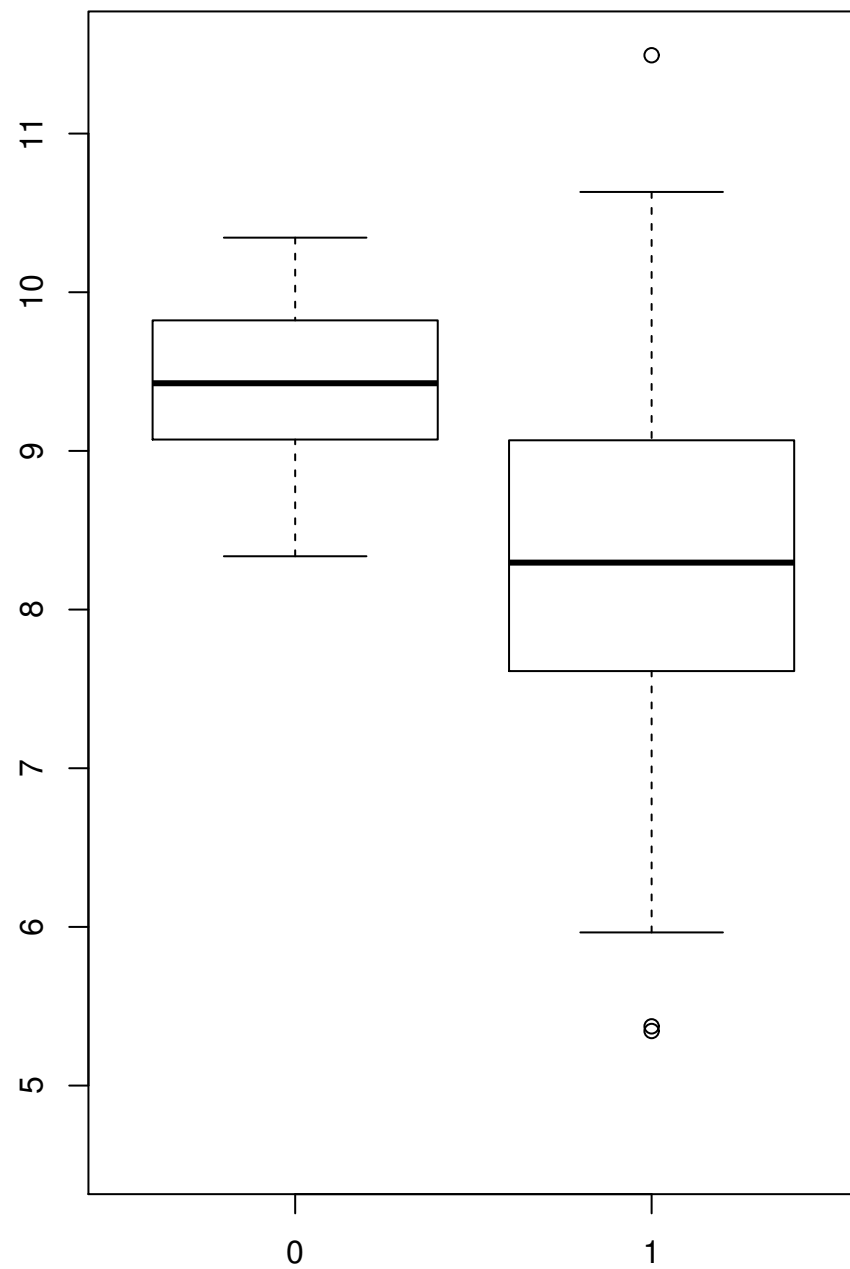

**hsa-miR-192  
(GSE67138)**

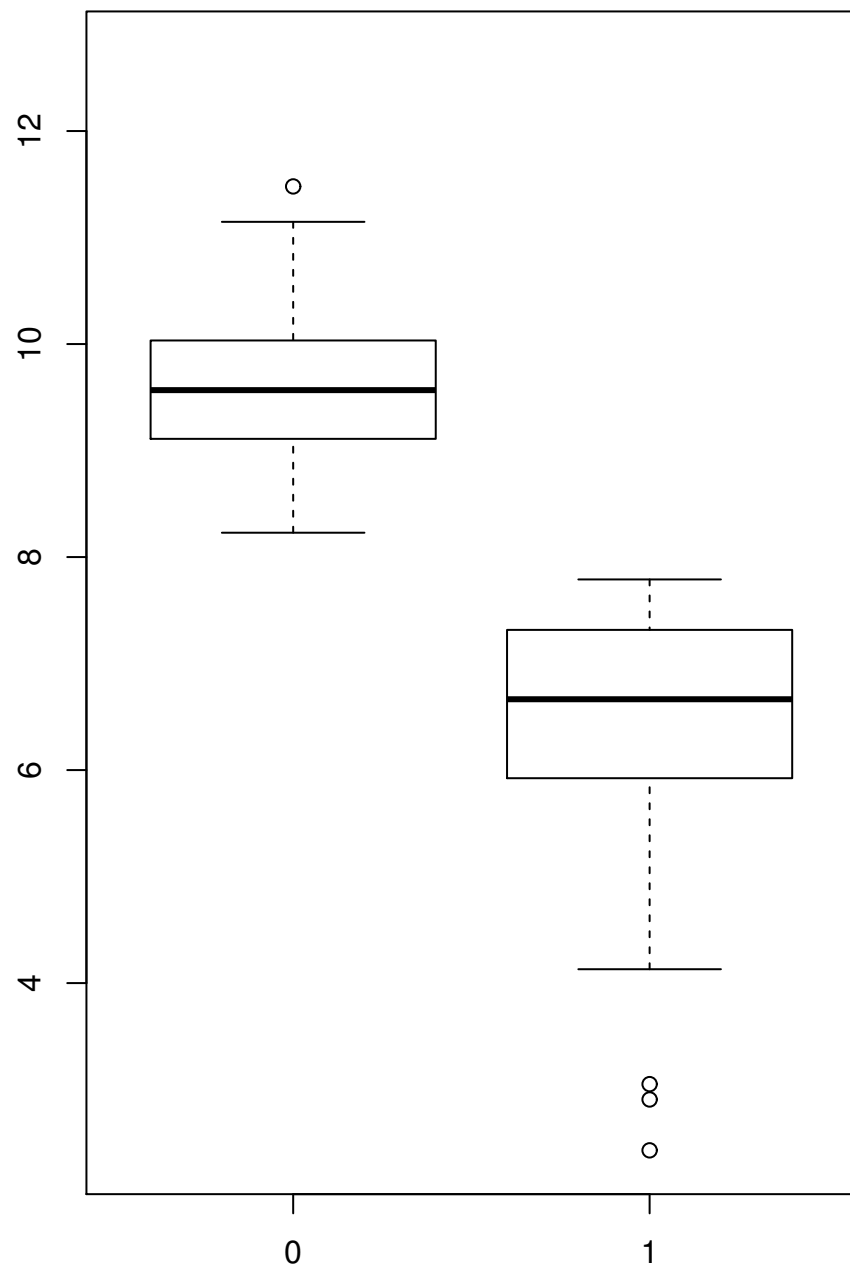

**hsa-miR-192  
(GSE67139)**

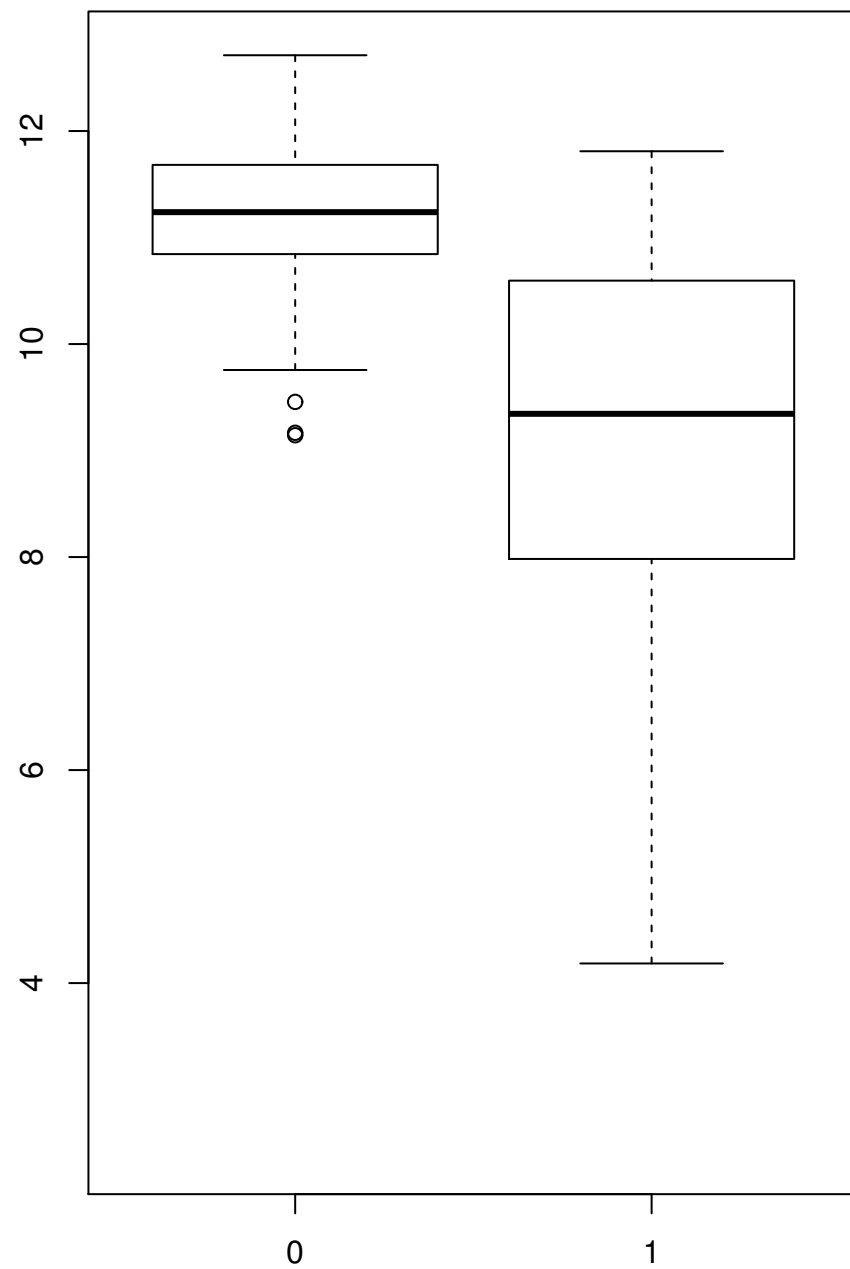

**hsa-miR-194  
(GSE67138)**

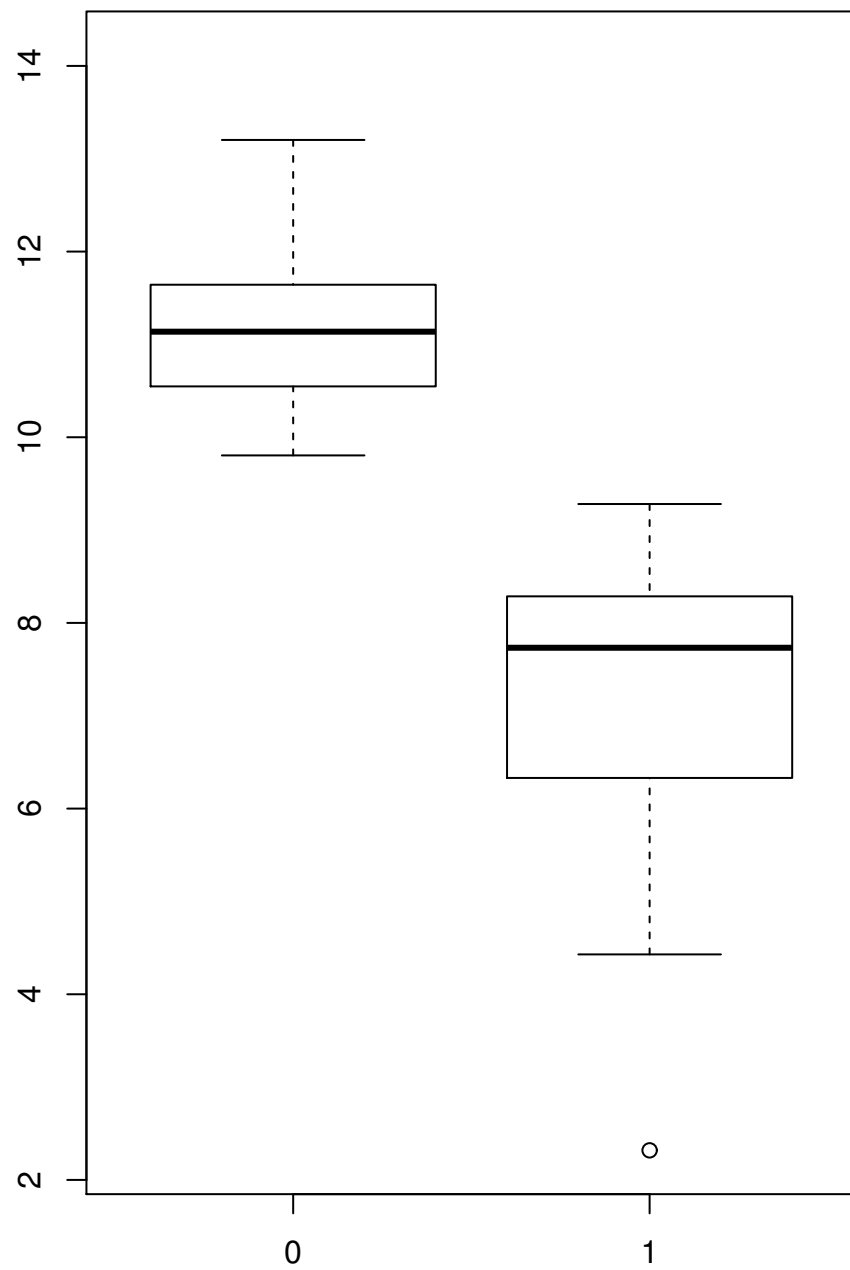

**hsa-miR-194  
(GSE67139)**

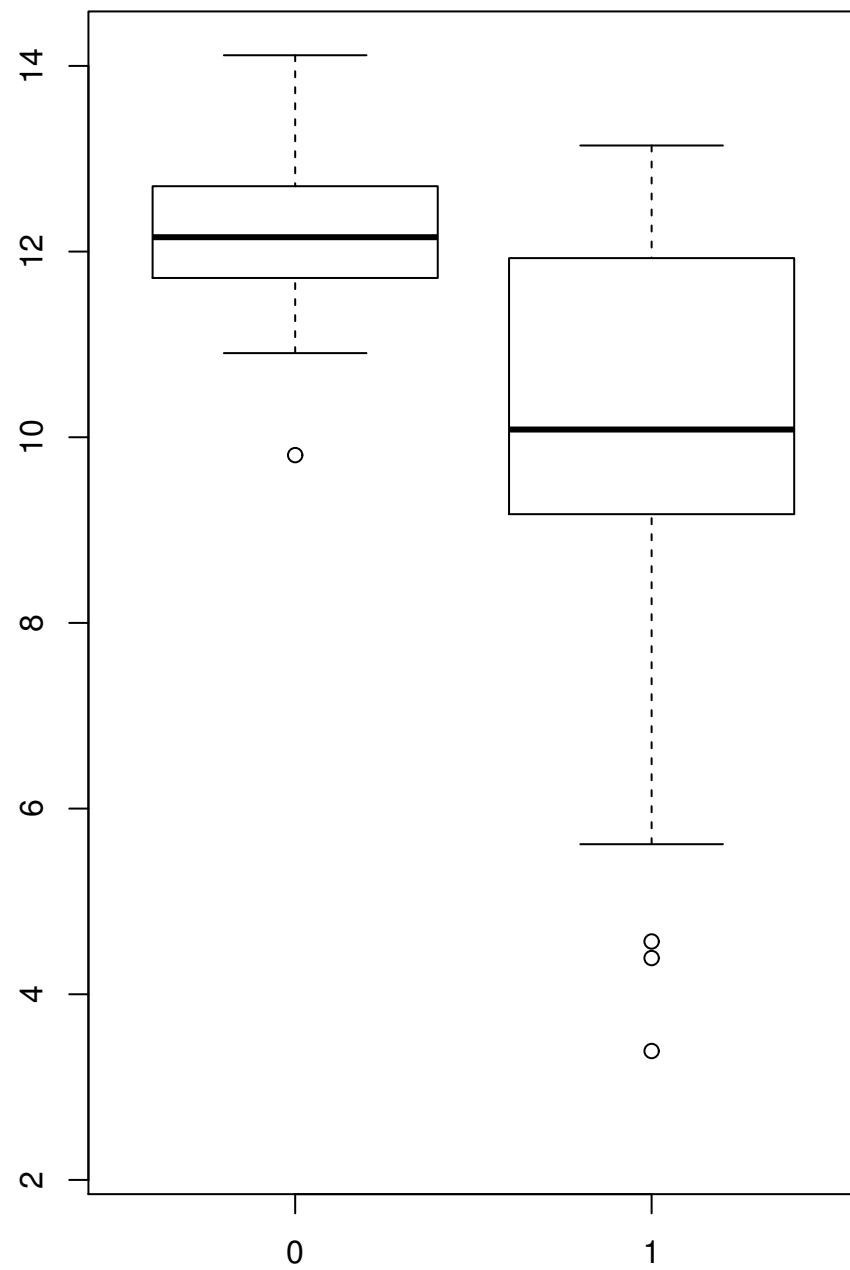

**hsa-miR-195  
(GSE67138)**

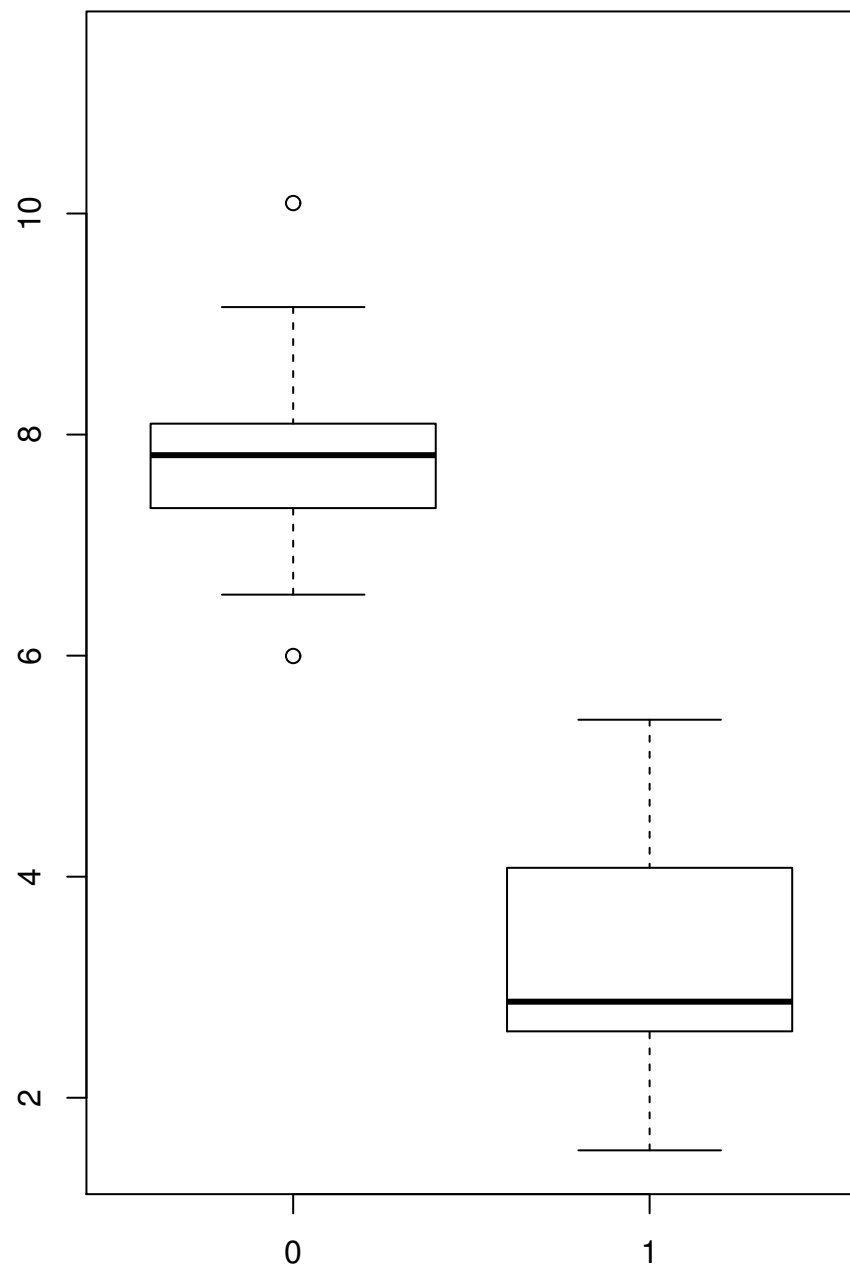

**hsa-miR-195  
(GSE67139)**

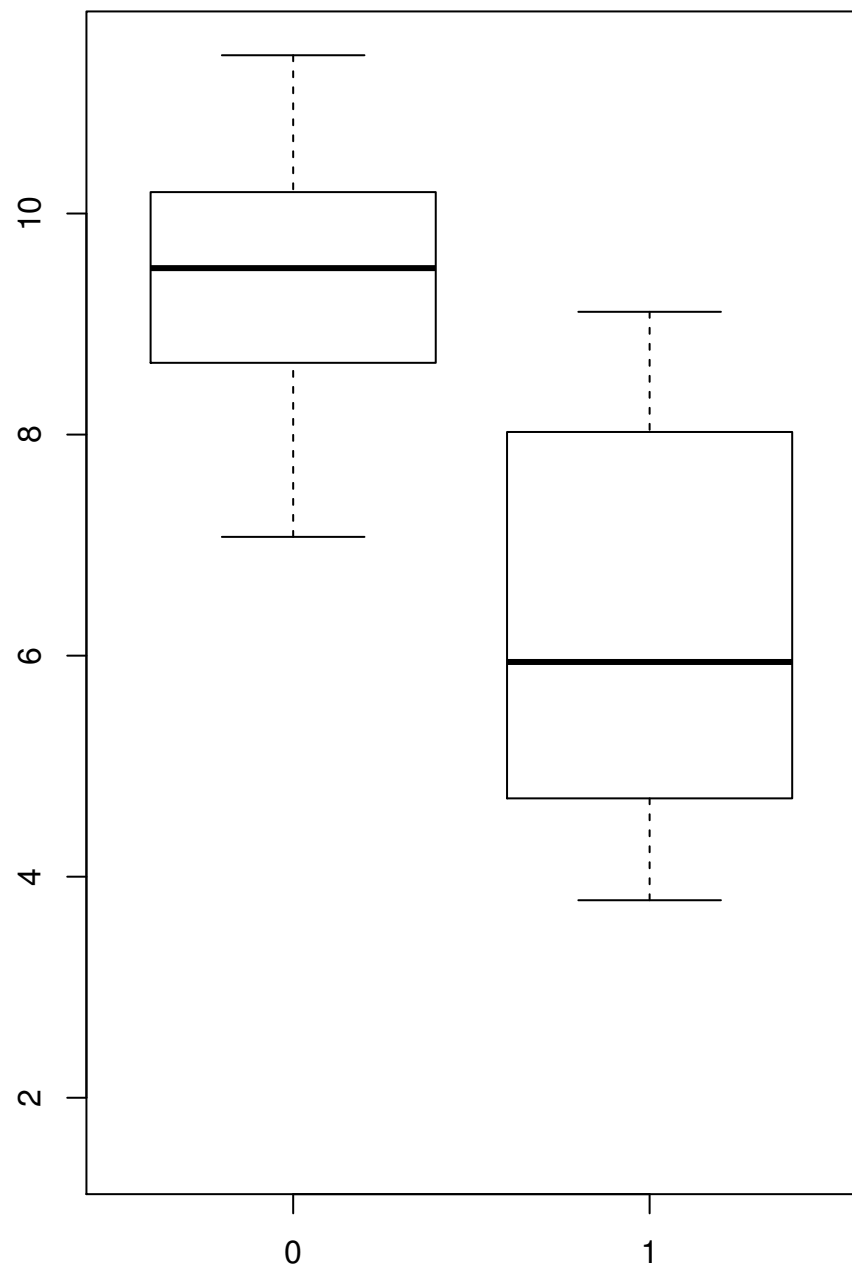

**hsa-miR-199a-3p  
(GSE67138)**

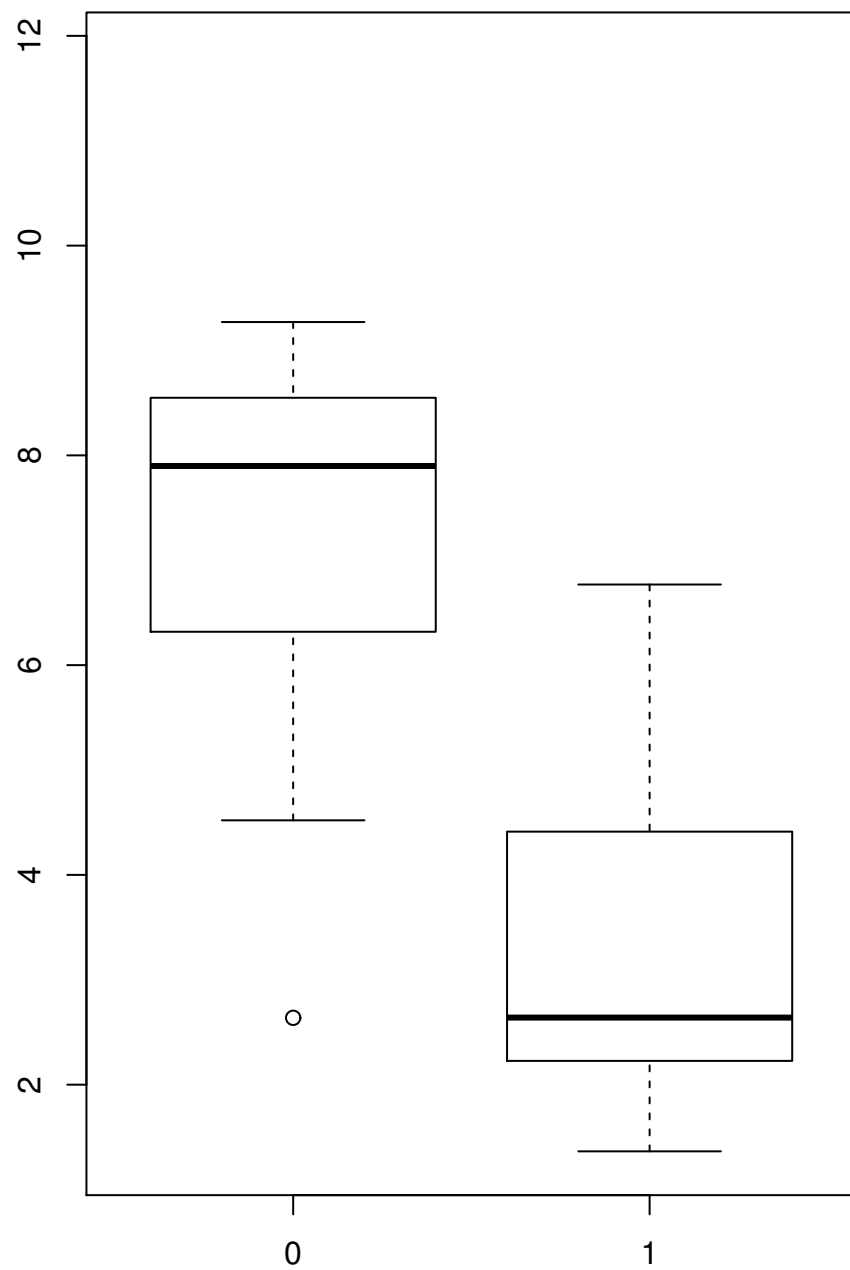

**hsa-miR-199a-3p  
(GSE67139)**

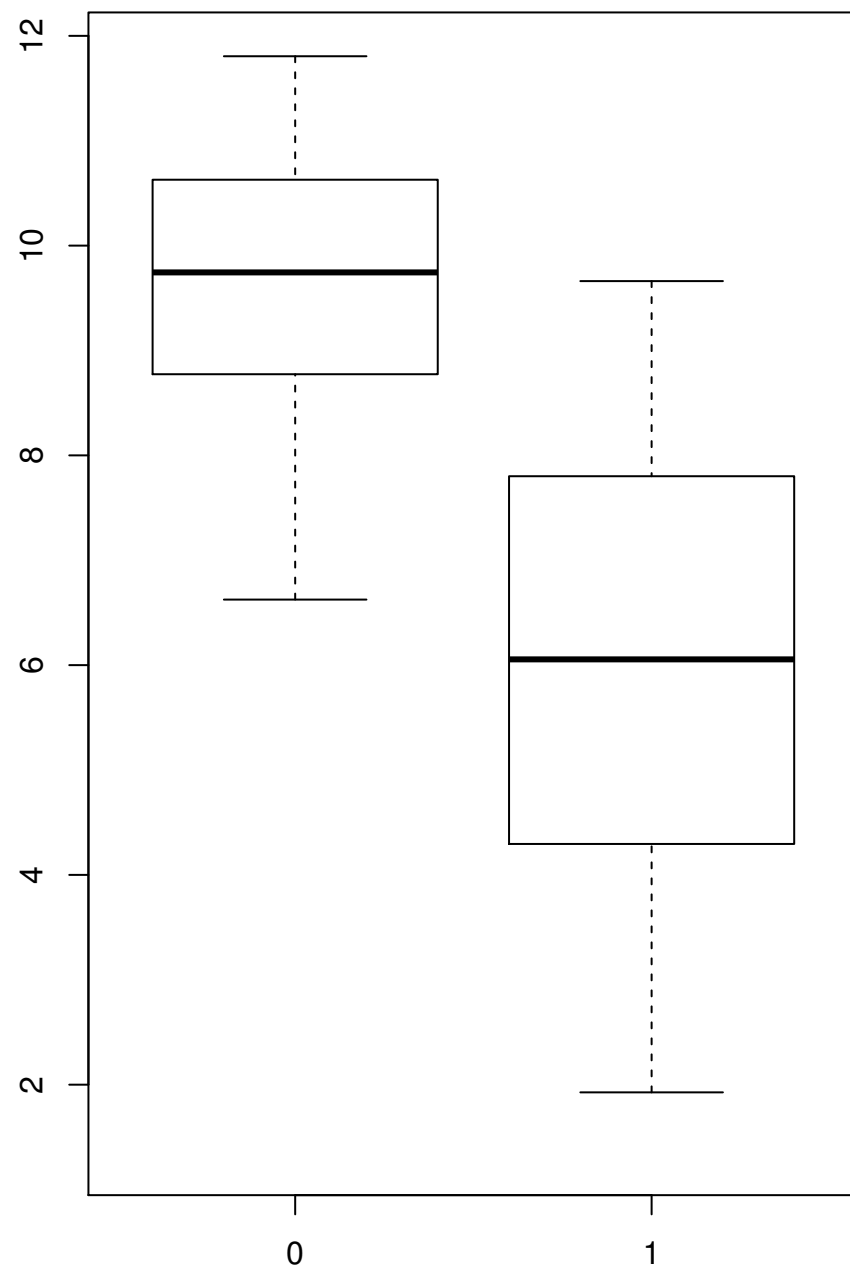

**hsa-miR-20a  
(GSE67138)**

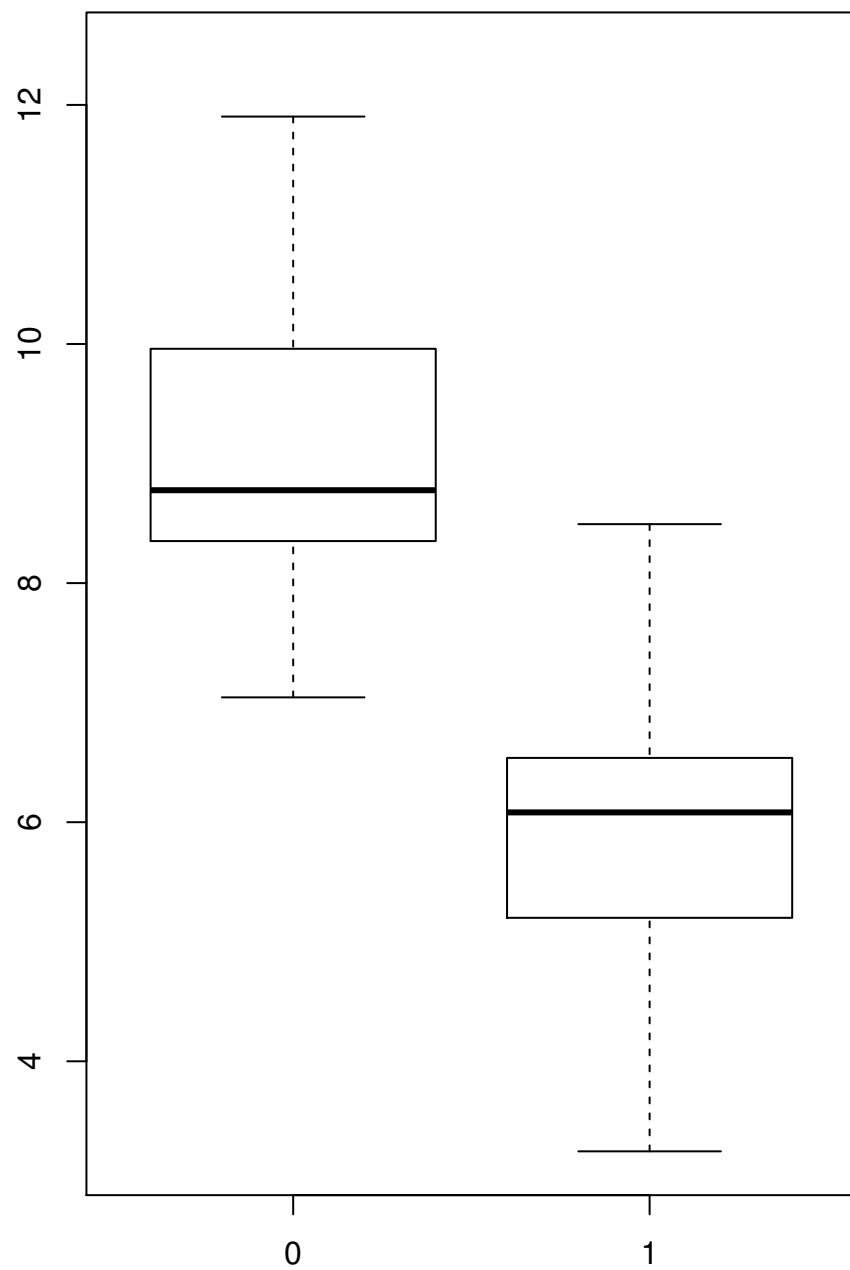

**hsa-miR-20a  
(GSE67139)**

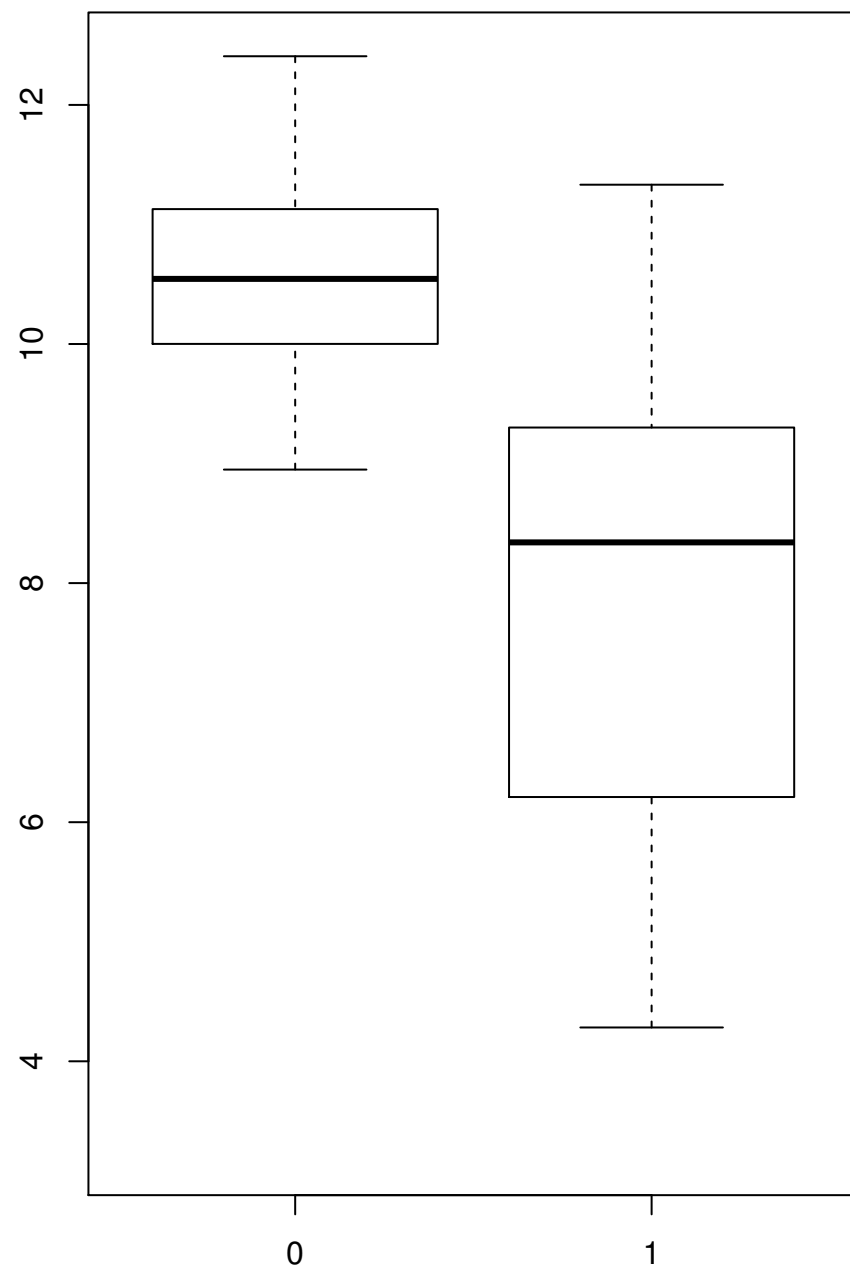



**hsa-miR-221  
(GSE67138)**

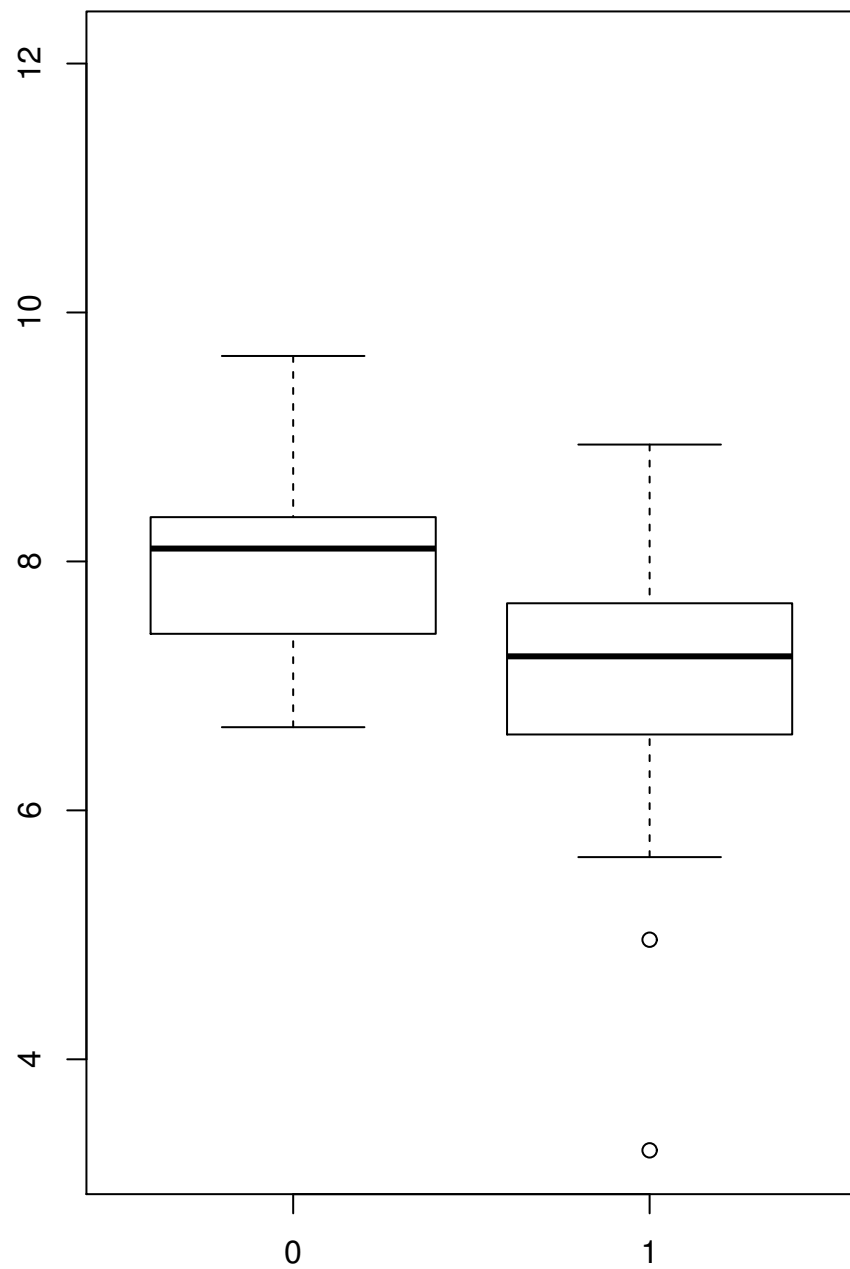

**hsa-miR-221  
(GSE67139)**

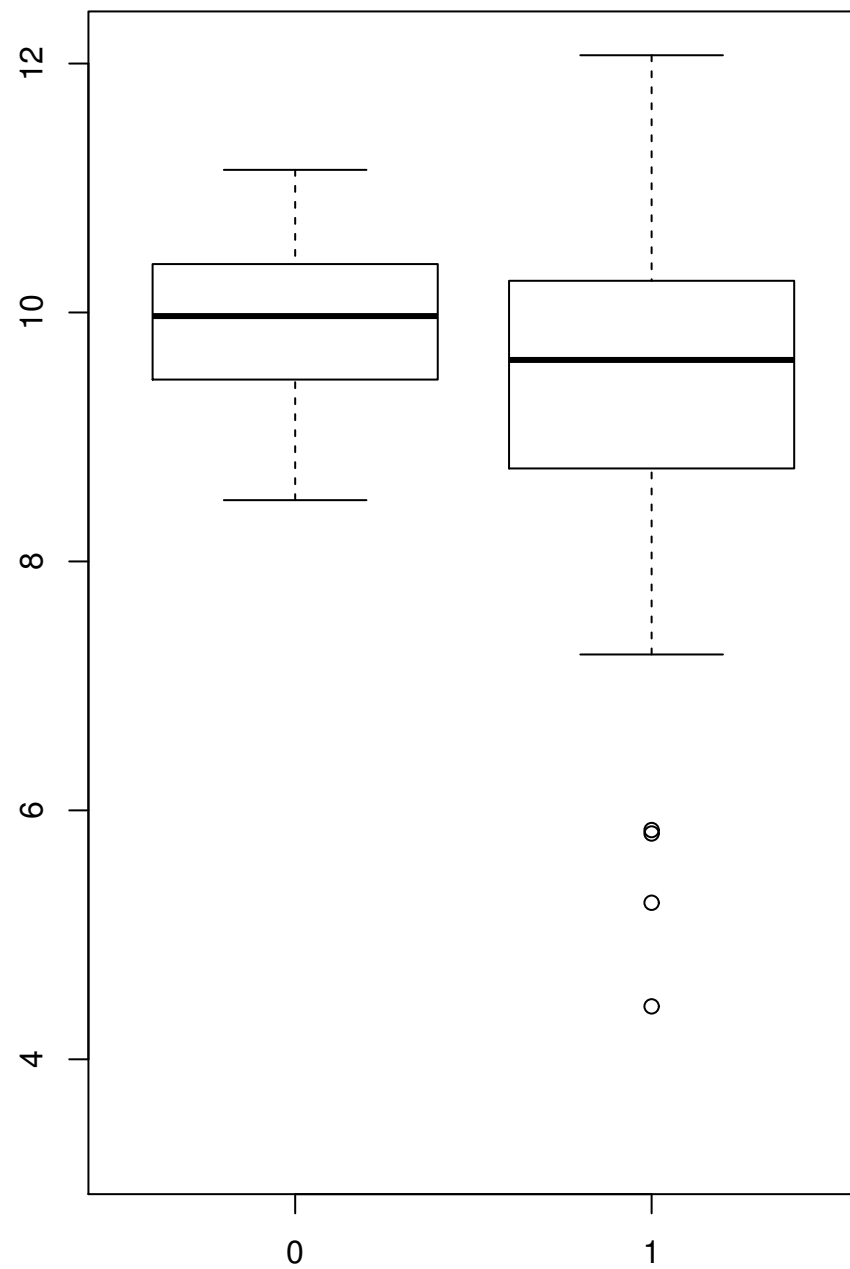

**hsa-miR-22  
(GSE67138)**

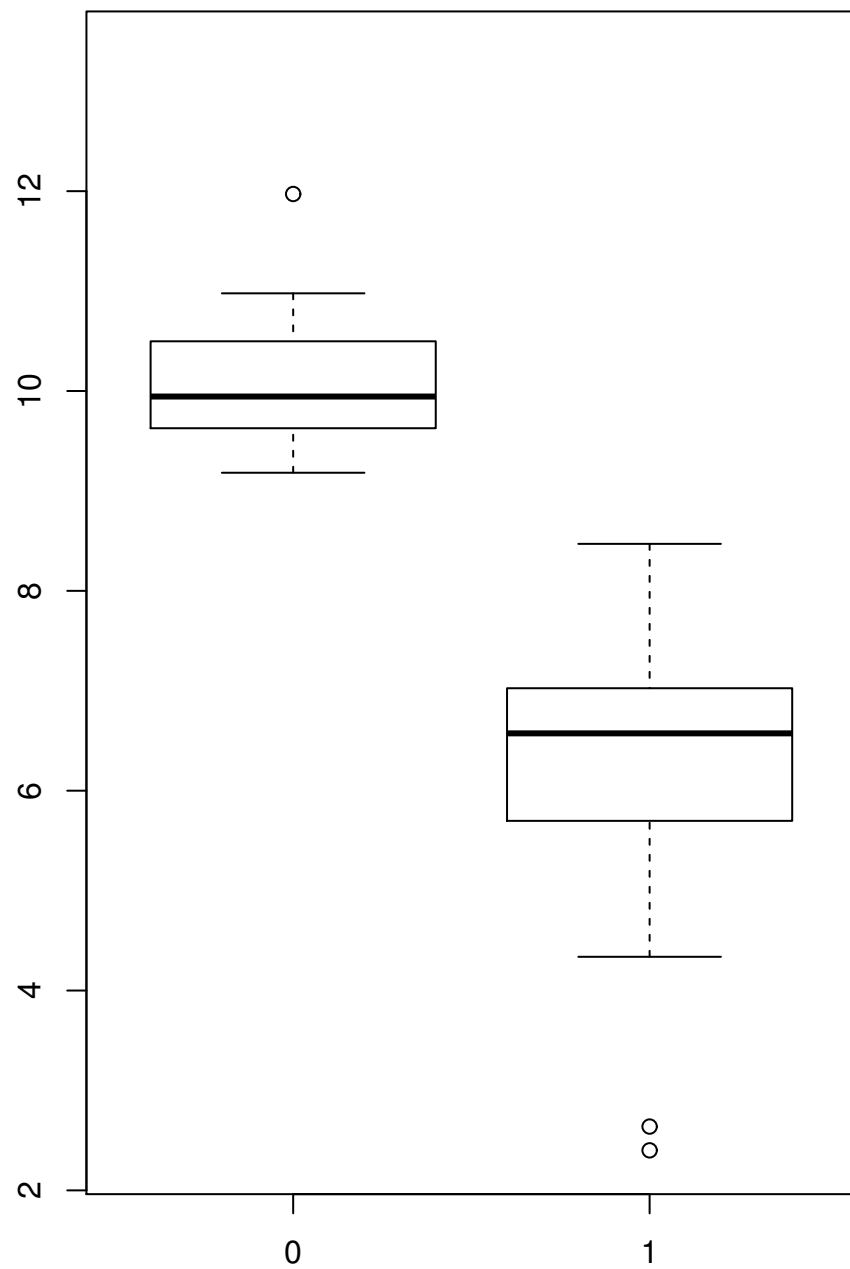

**hsa-miR-22  
(GSE67139)**

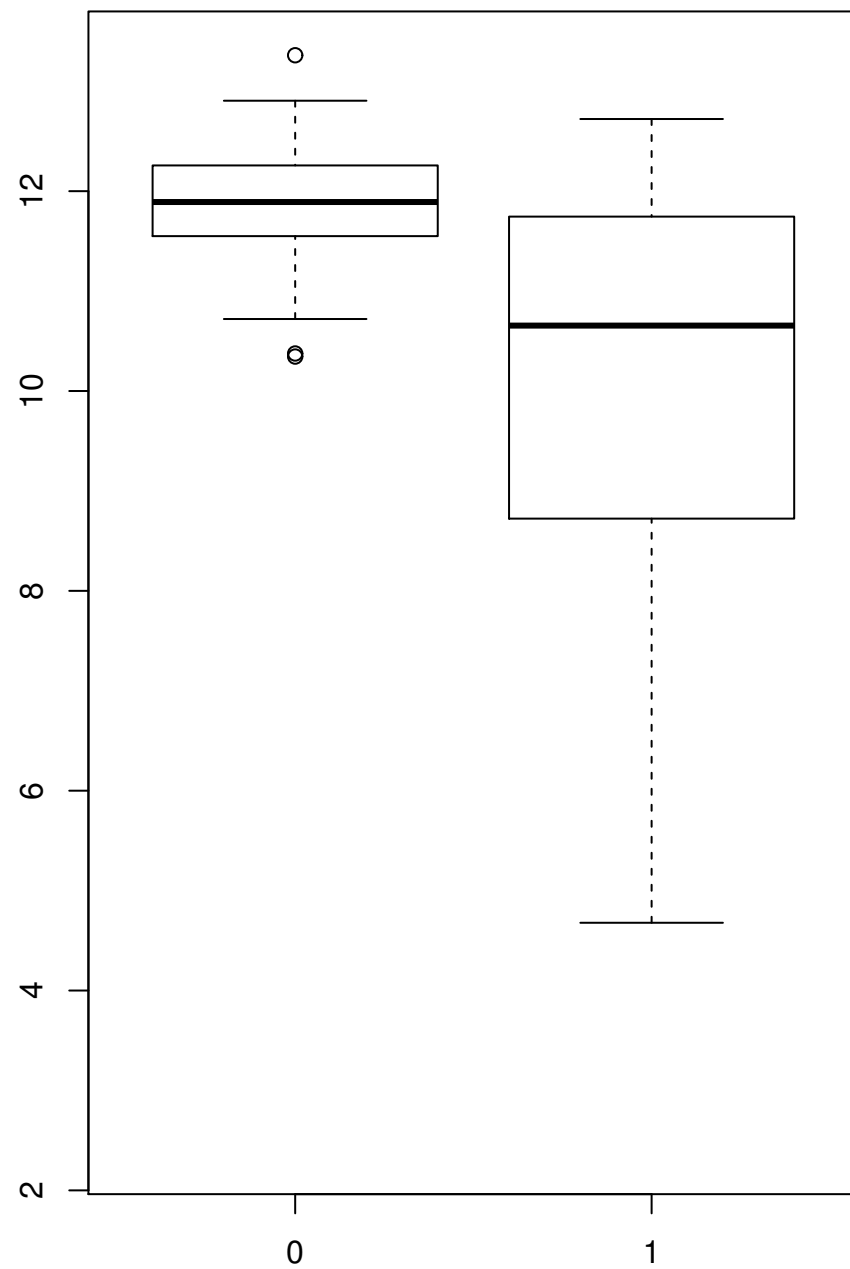

**hsa-miR-23a  
(GSE67138)**

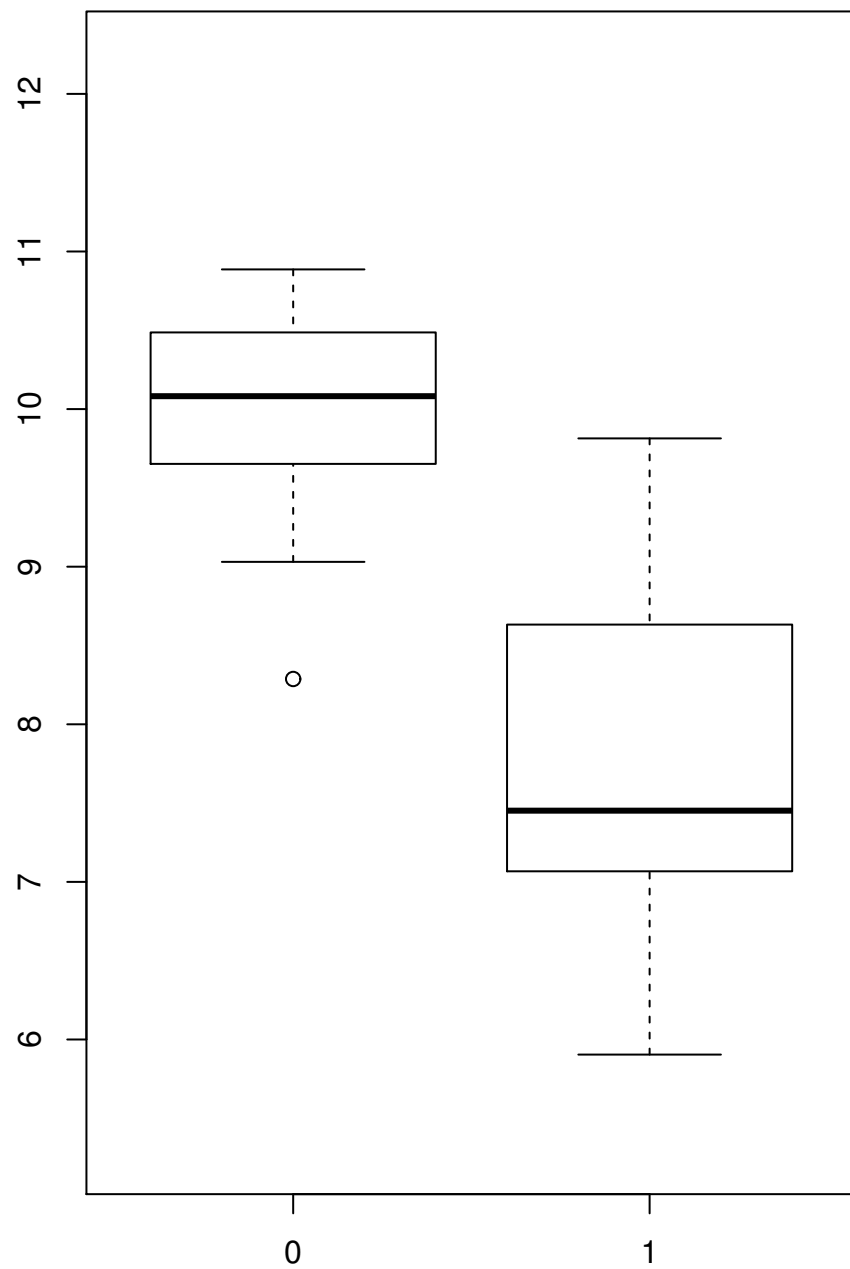

**hsa-miR-23a  
(GSE67139)**

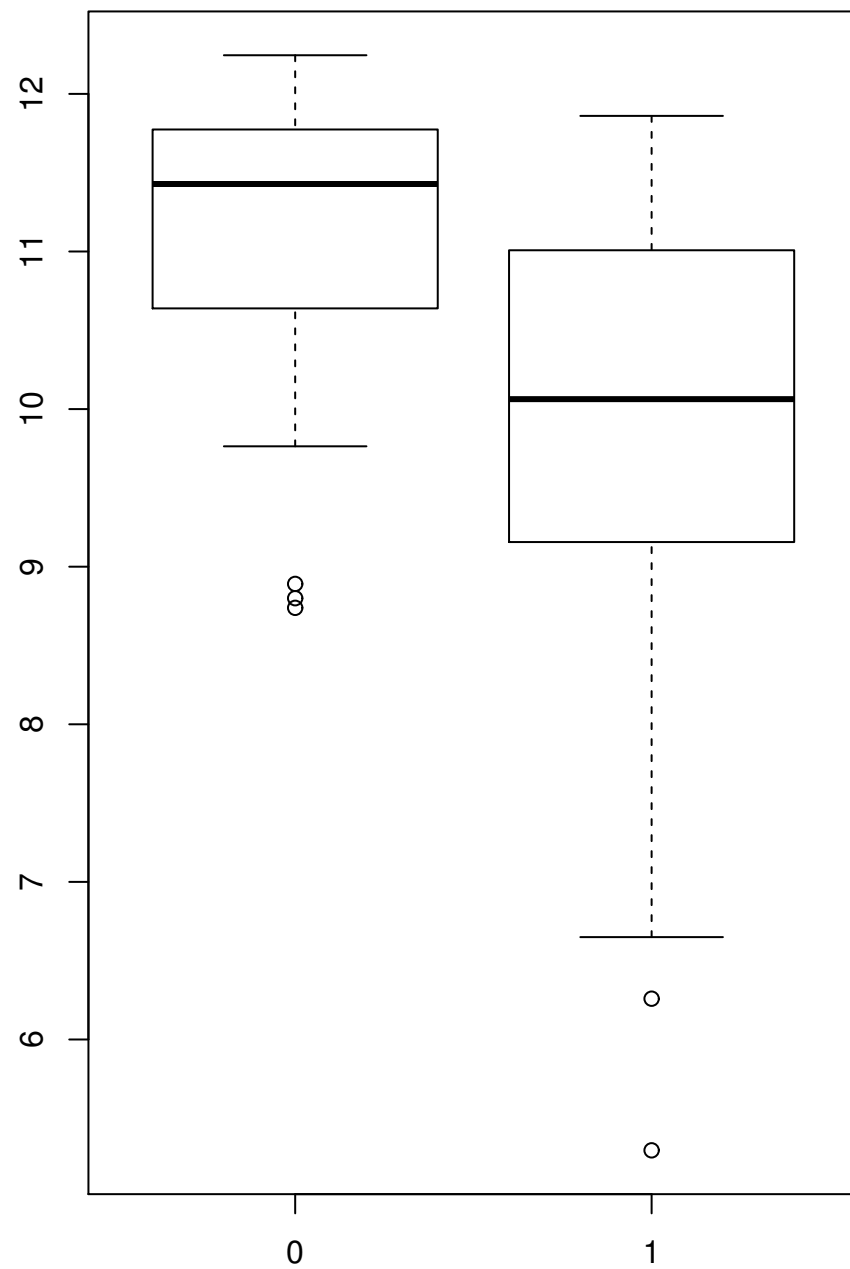

**hsa-miR-24  
(GSE67138)**

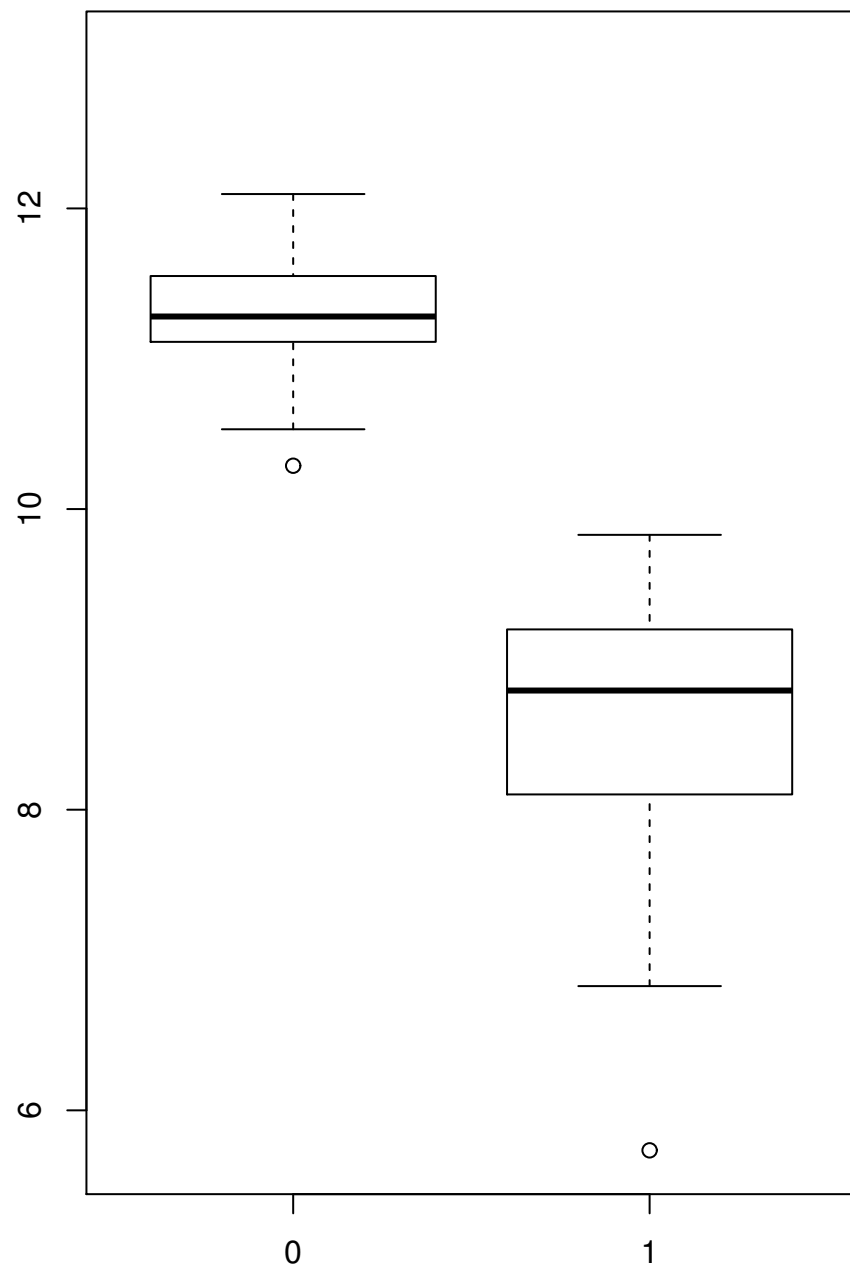

**hsa-miR-24  
(GSE67139)**

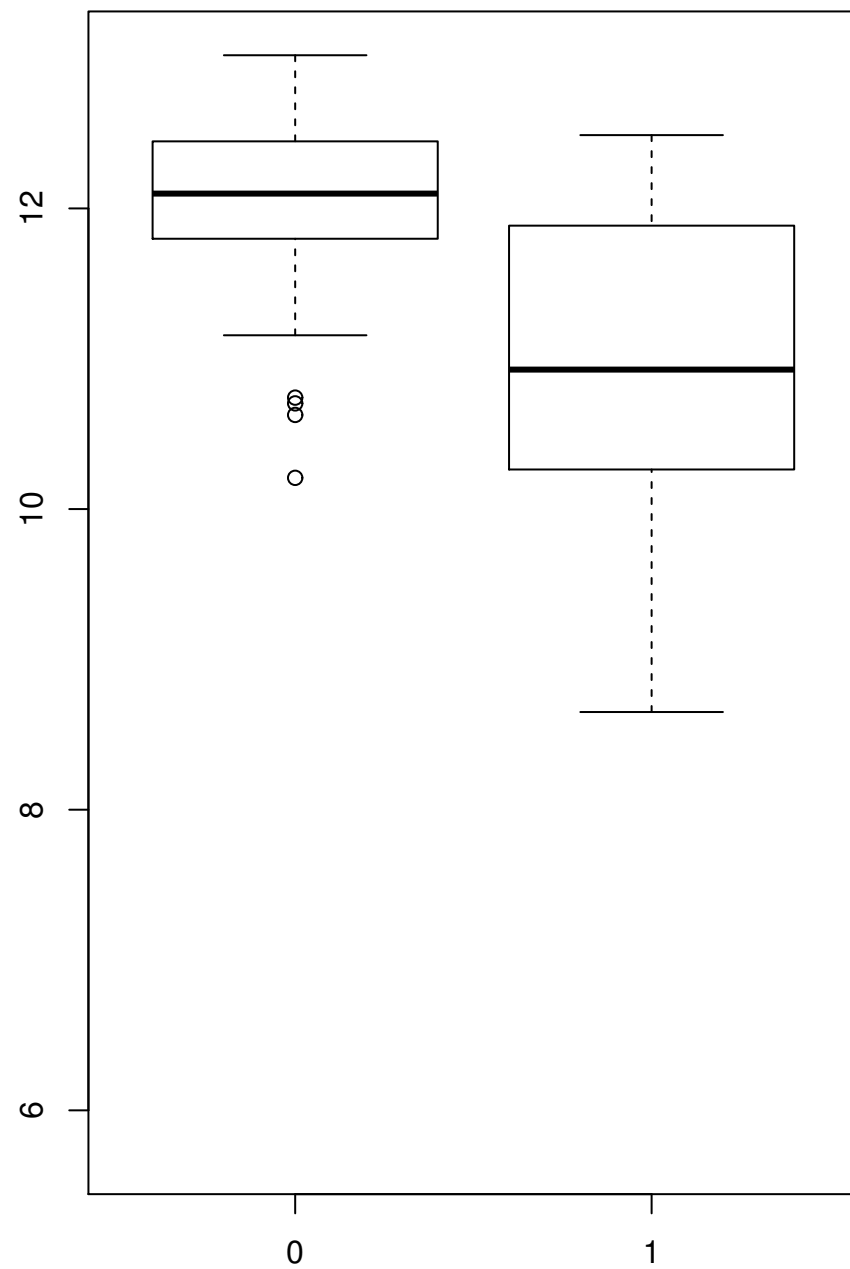

**hsa-miR-25  
(GSE67138)**

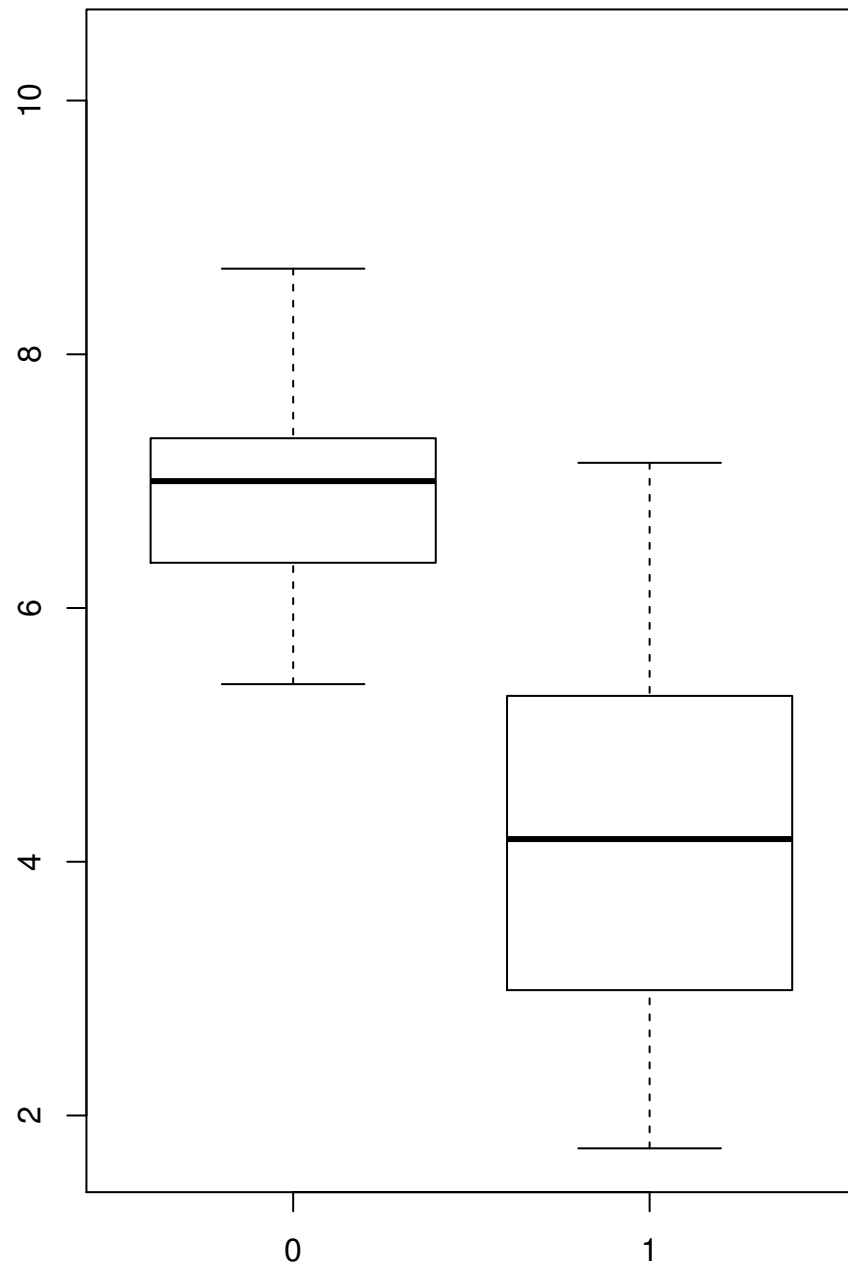

**hsa-miR-25  
(GSE67139)**

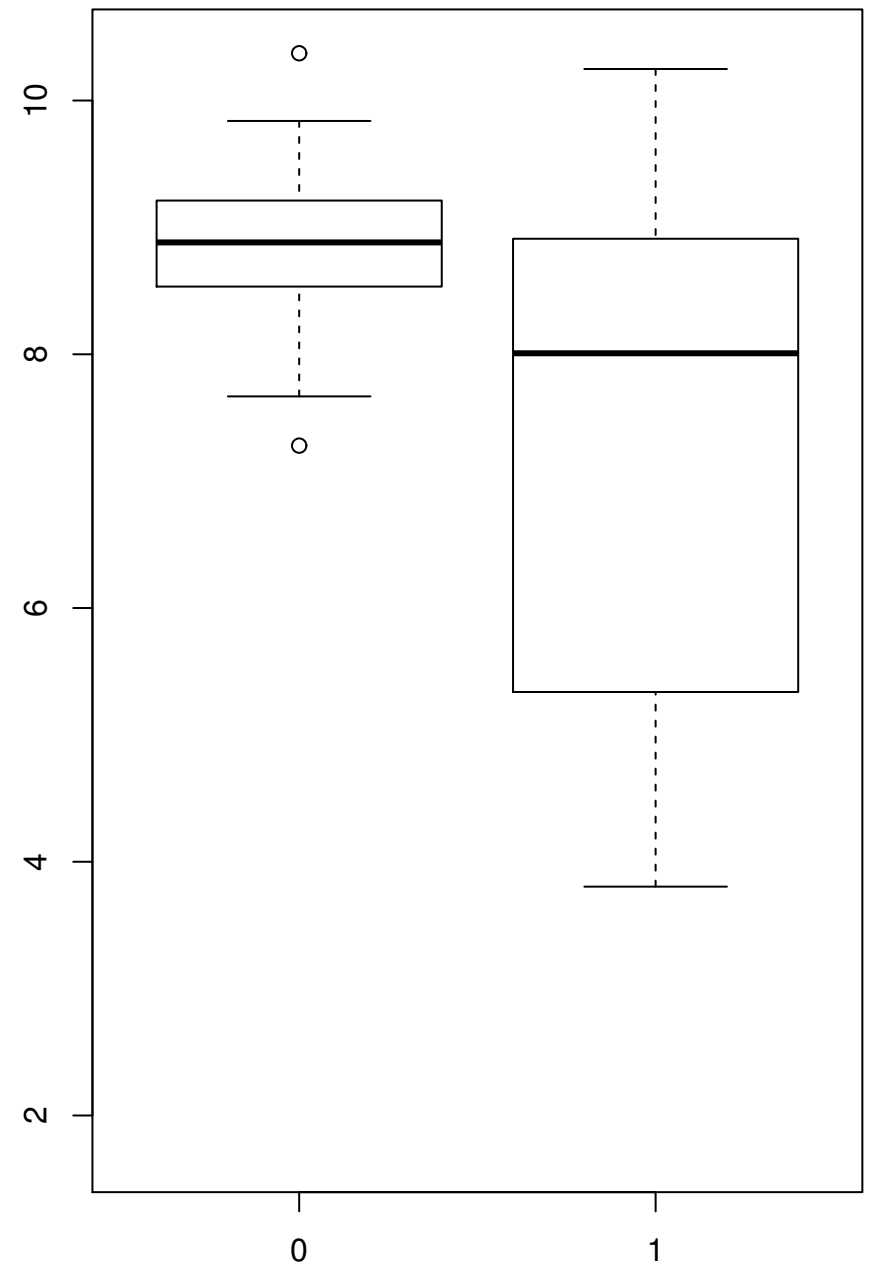

**hsa-miR-26a**  
**(GSE67138)**

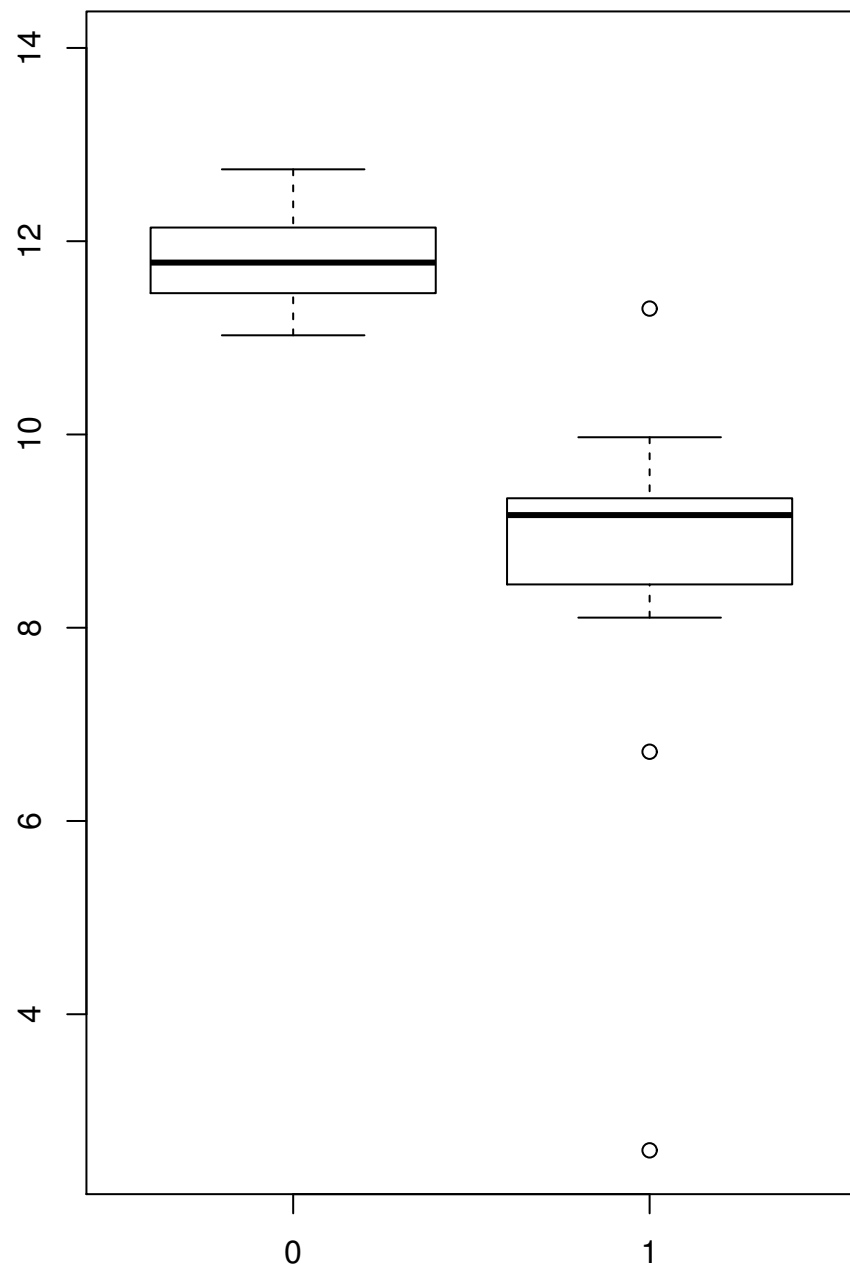

**hsa-miR-26a**  
**(GSE67139)**

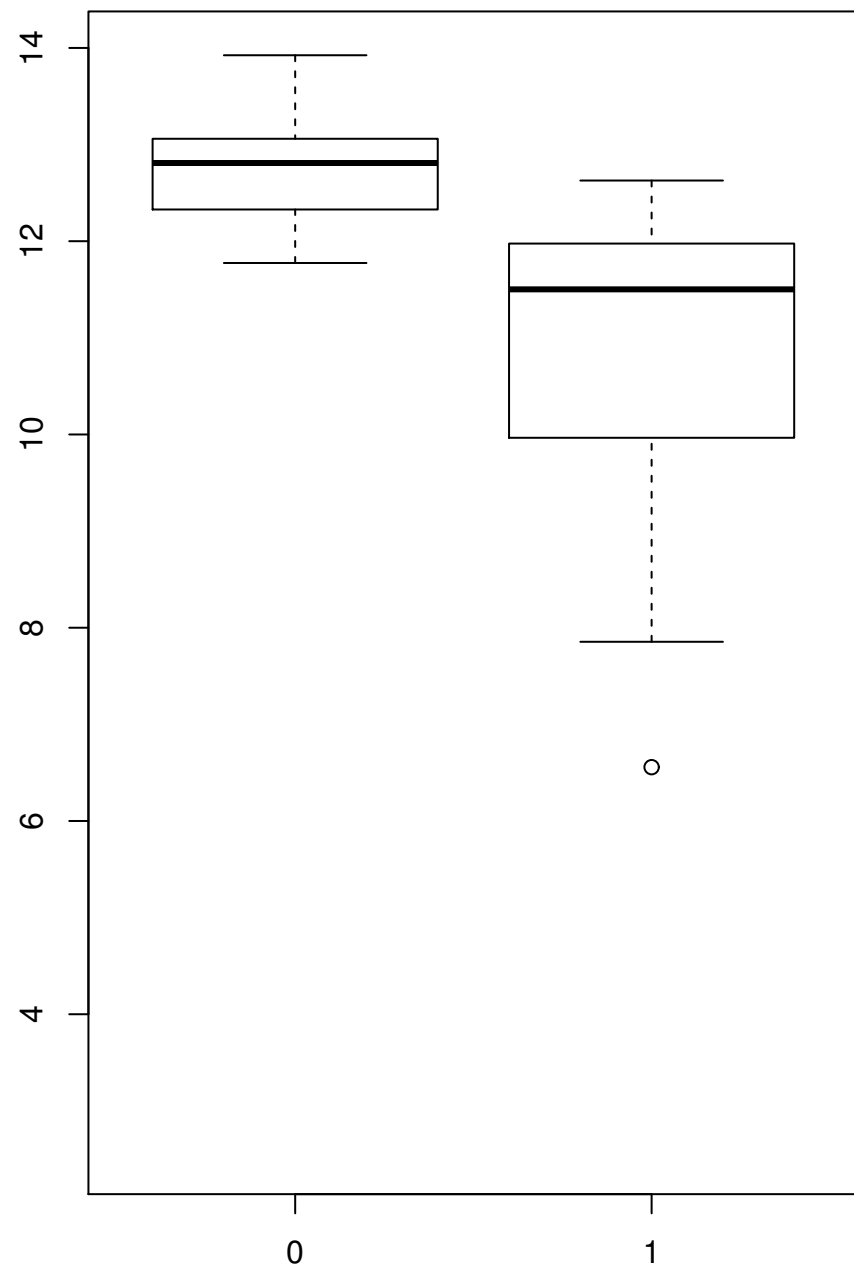

**hsa-miR-27a  
(GSE67138)**

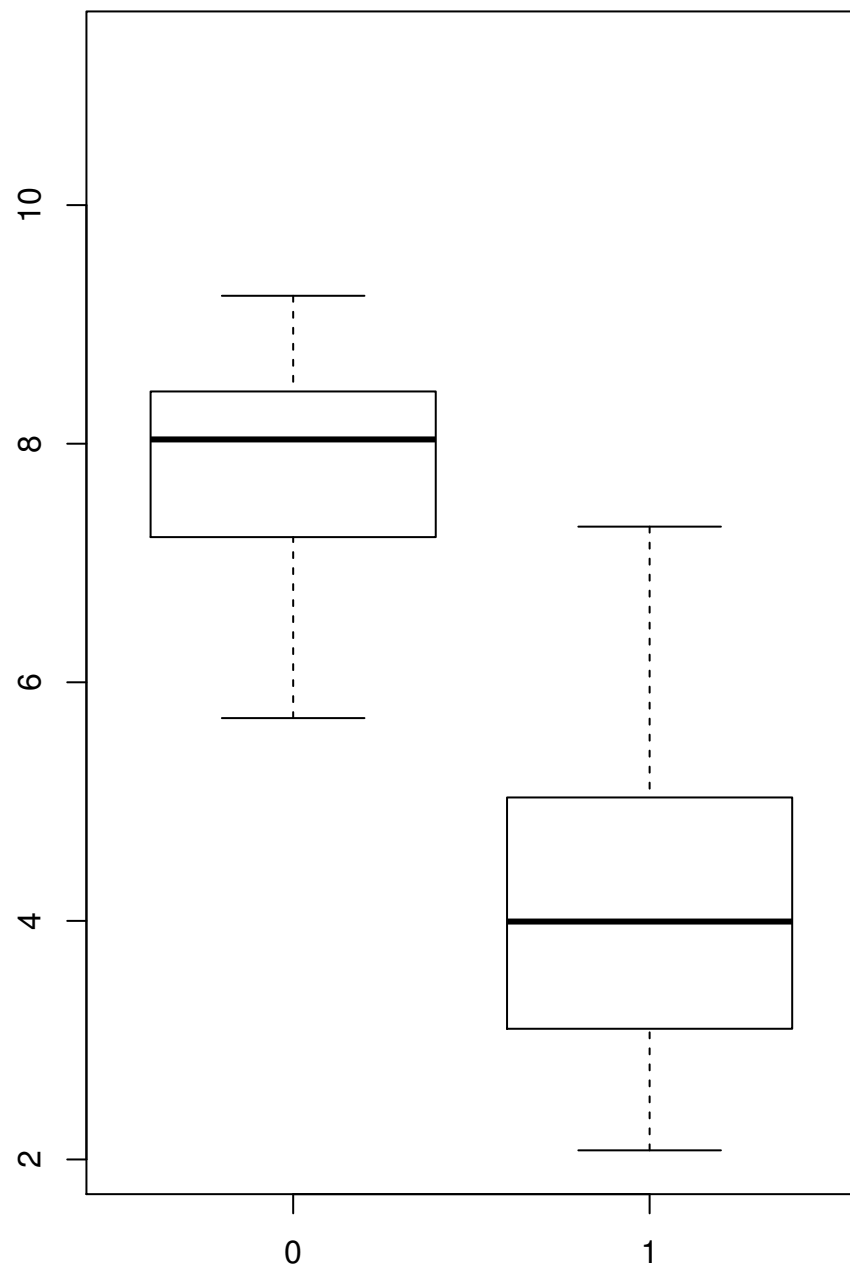

**hsa-miR-27a  
(GSE67139)**

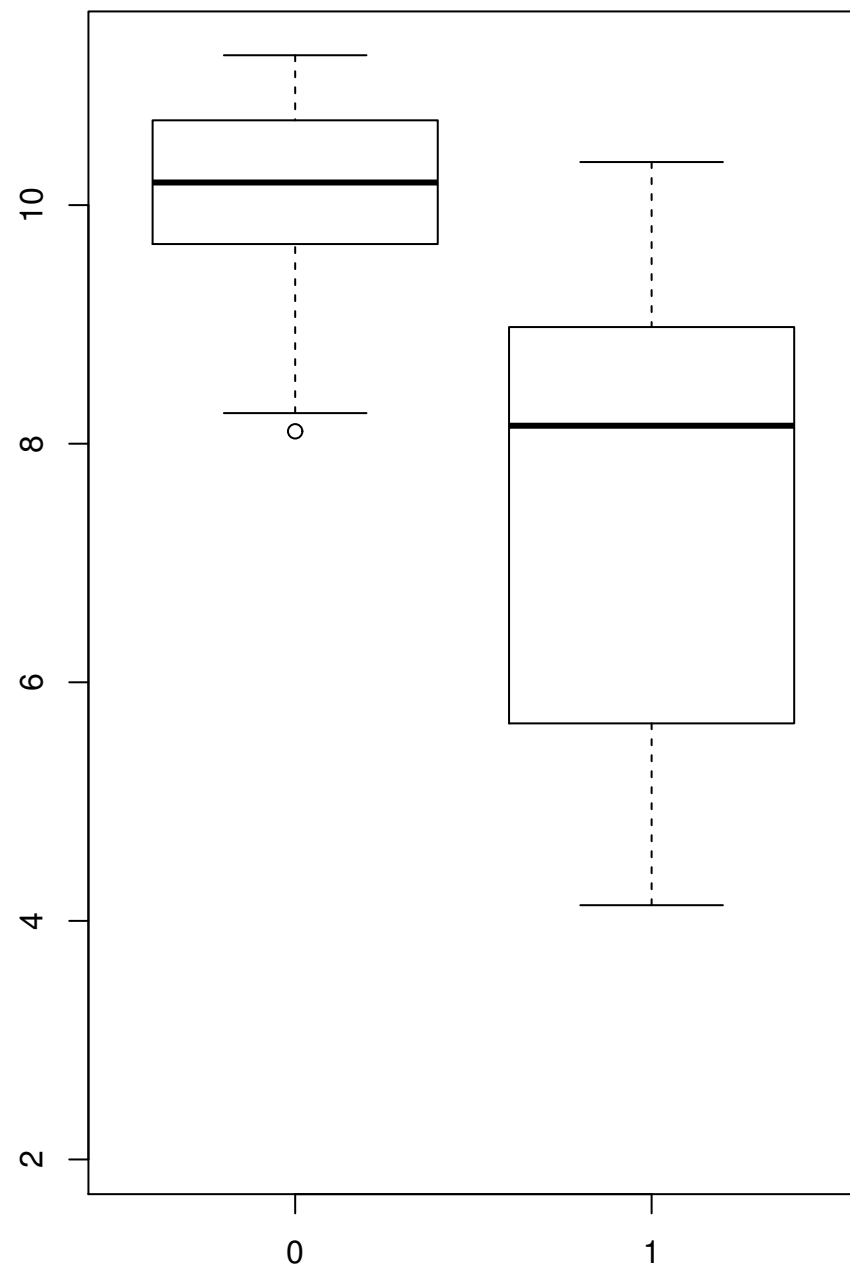

**hsa-miR-27b  
(GSE67138)**

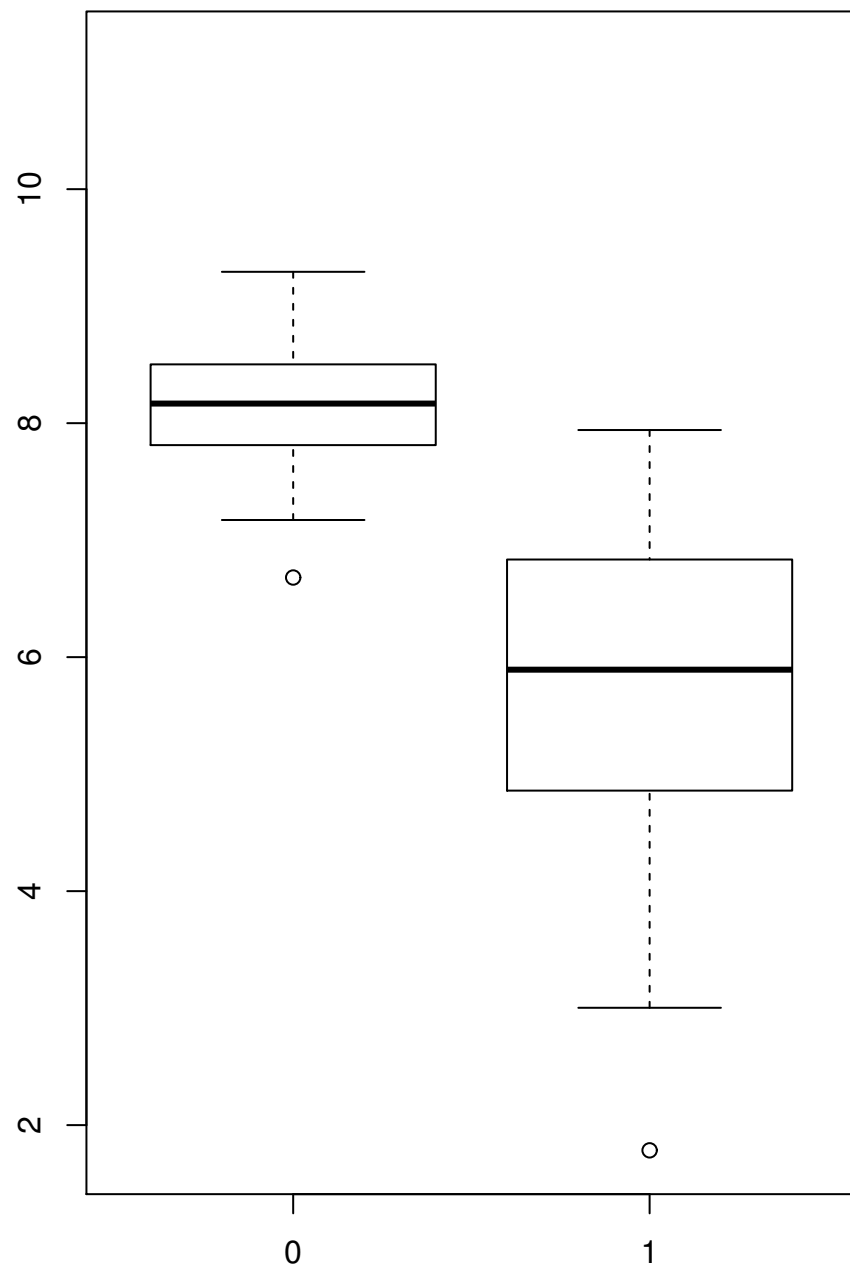

**hsa-miR-27b  
(GSE67139)**

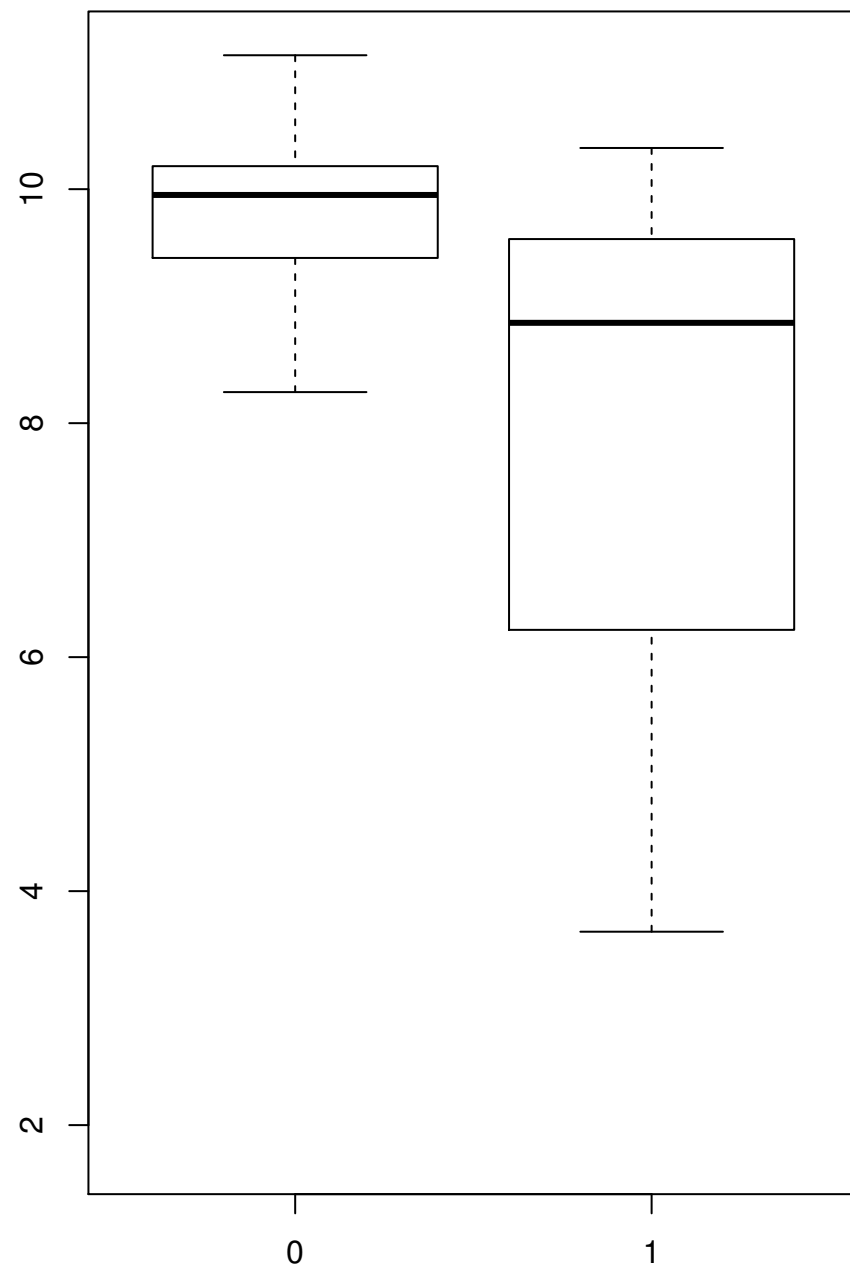



**hsa-miR-28-3p  
(GSE67138)**

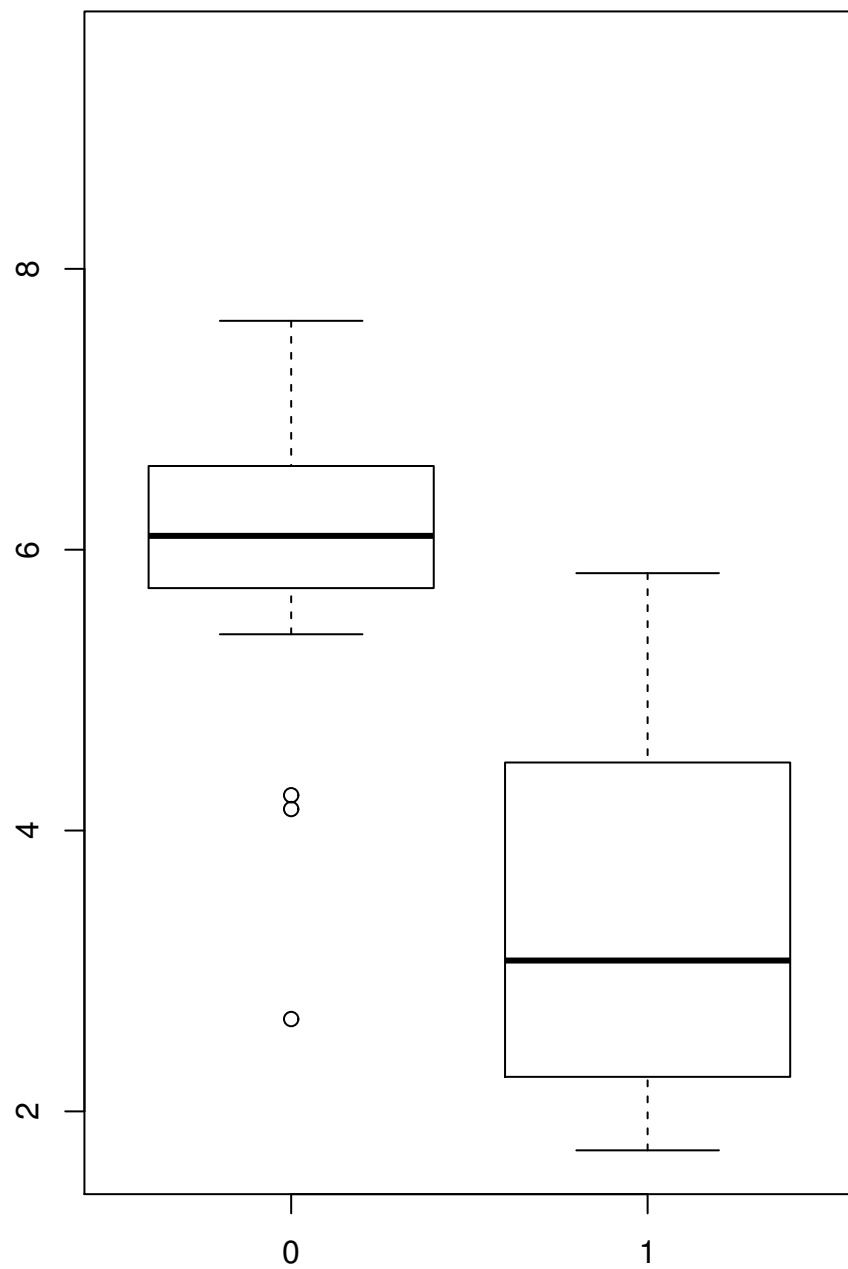

**hsa-miR-28-3p  
(GSE67139)**

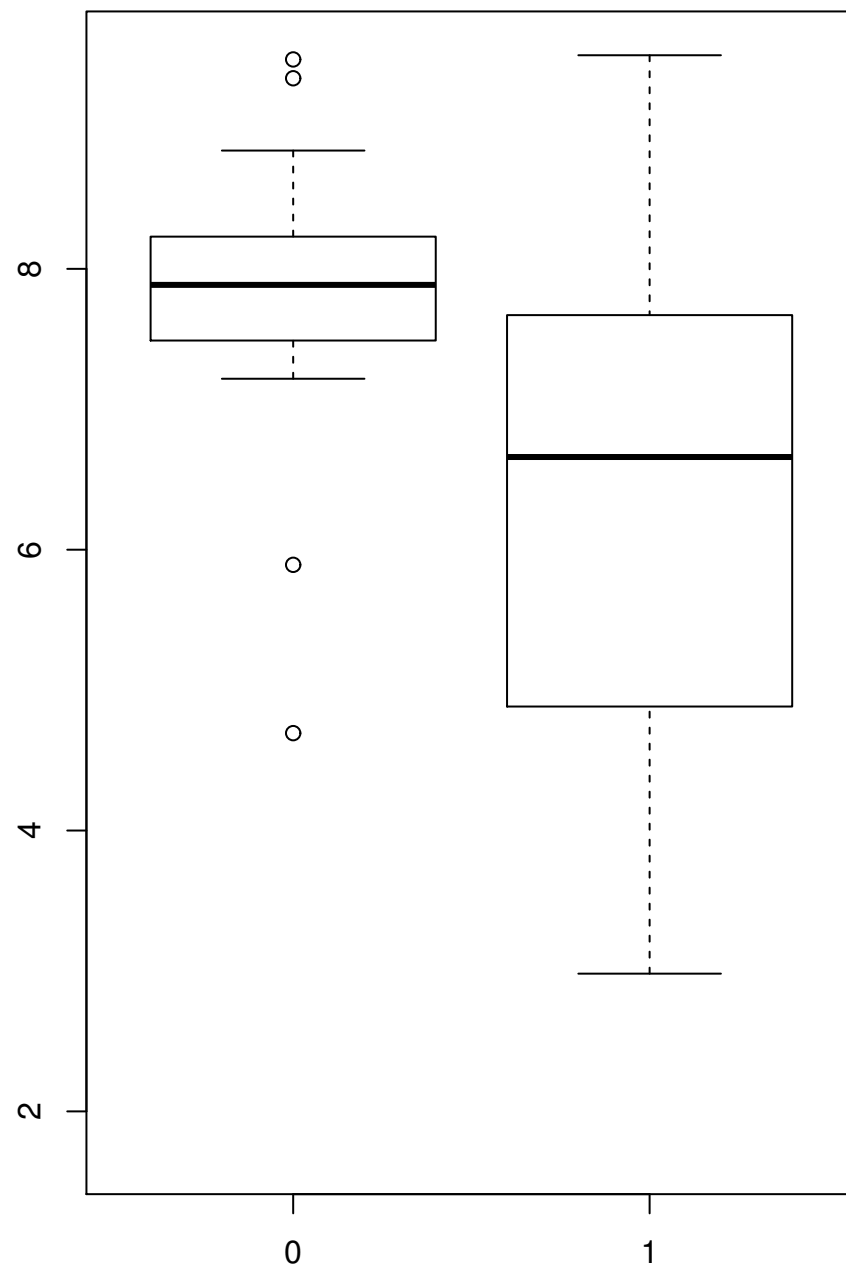

**hsa-miR-29a**  
**(GSE67138)**

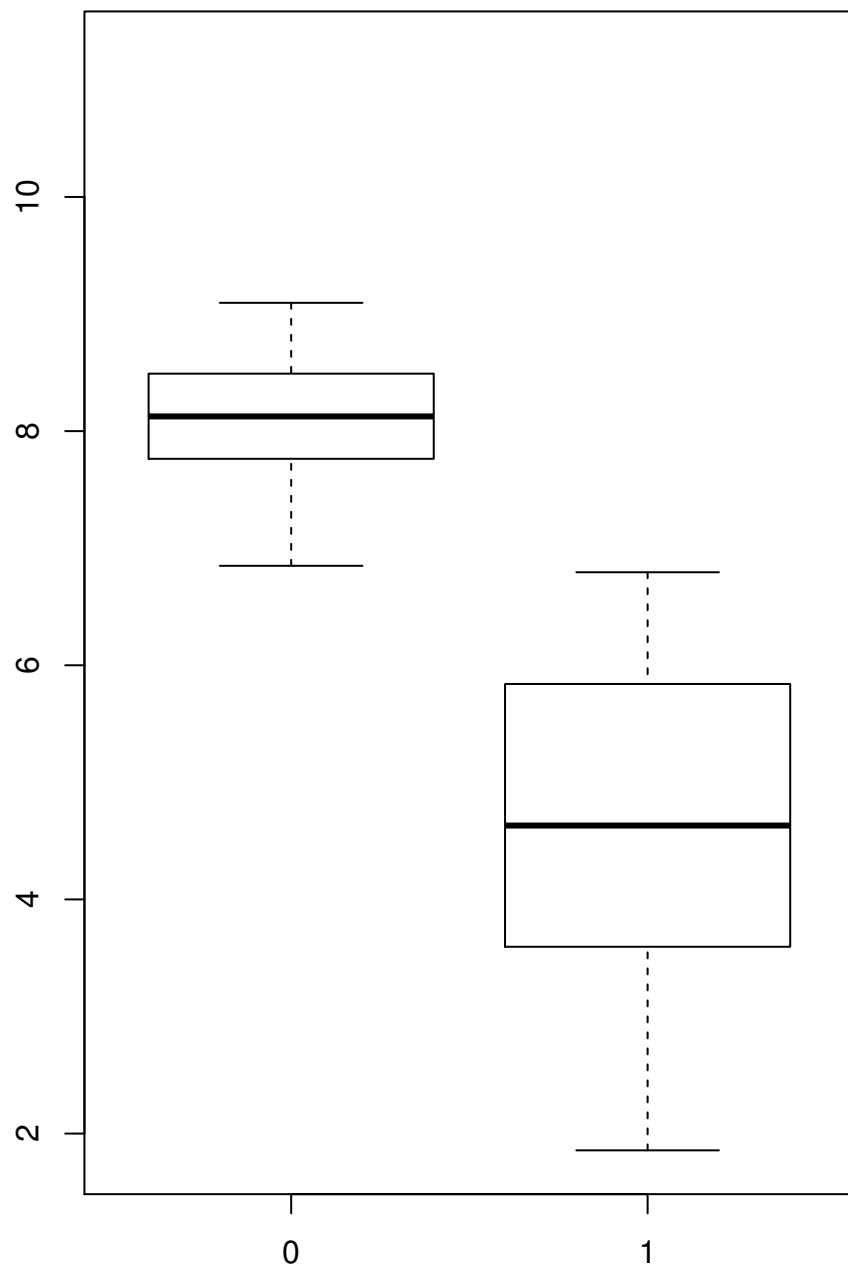

**hsa-miR-29a**  
**(GSE67139)**

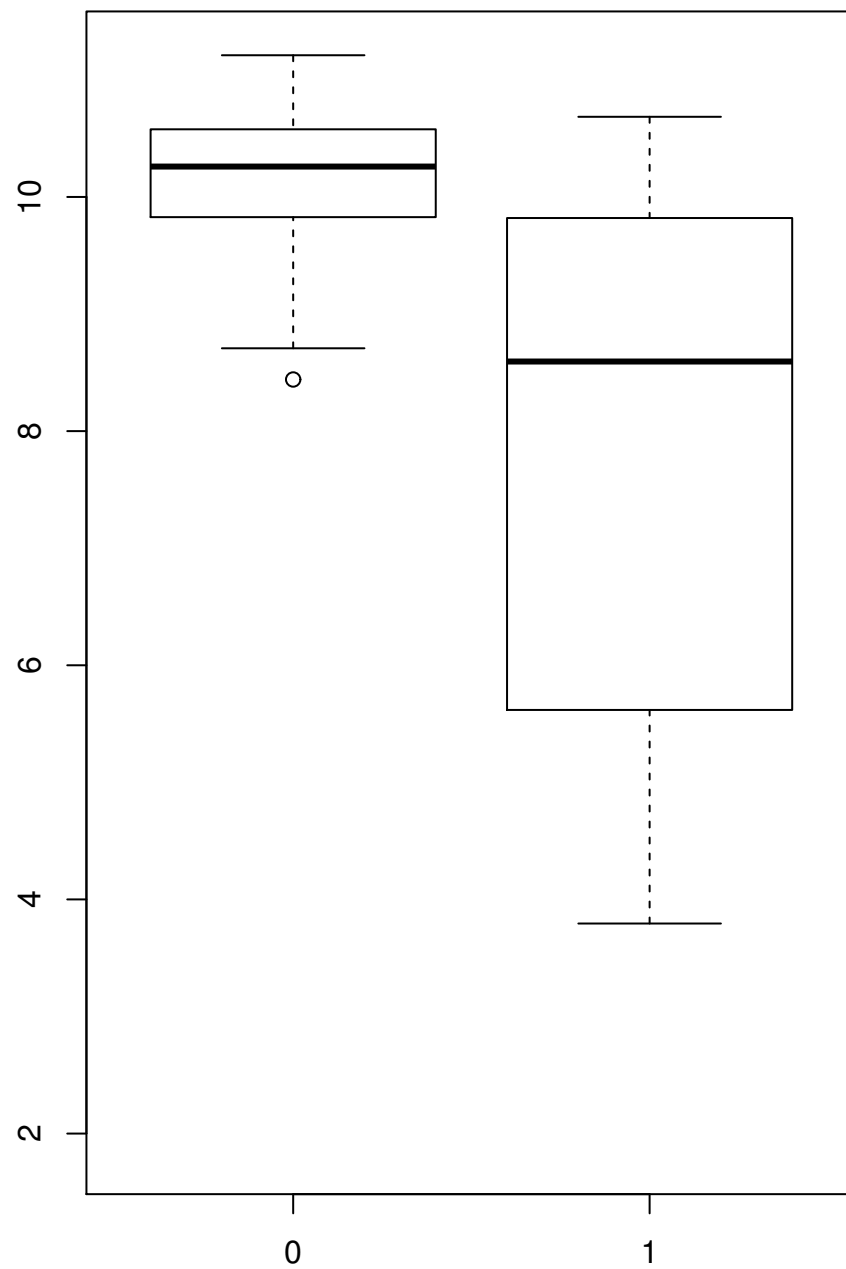

**hsa-miR-30a  
(GSE67138)**

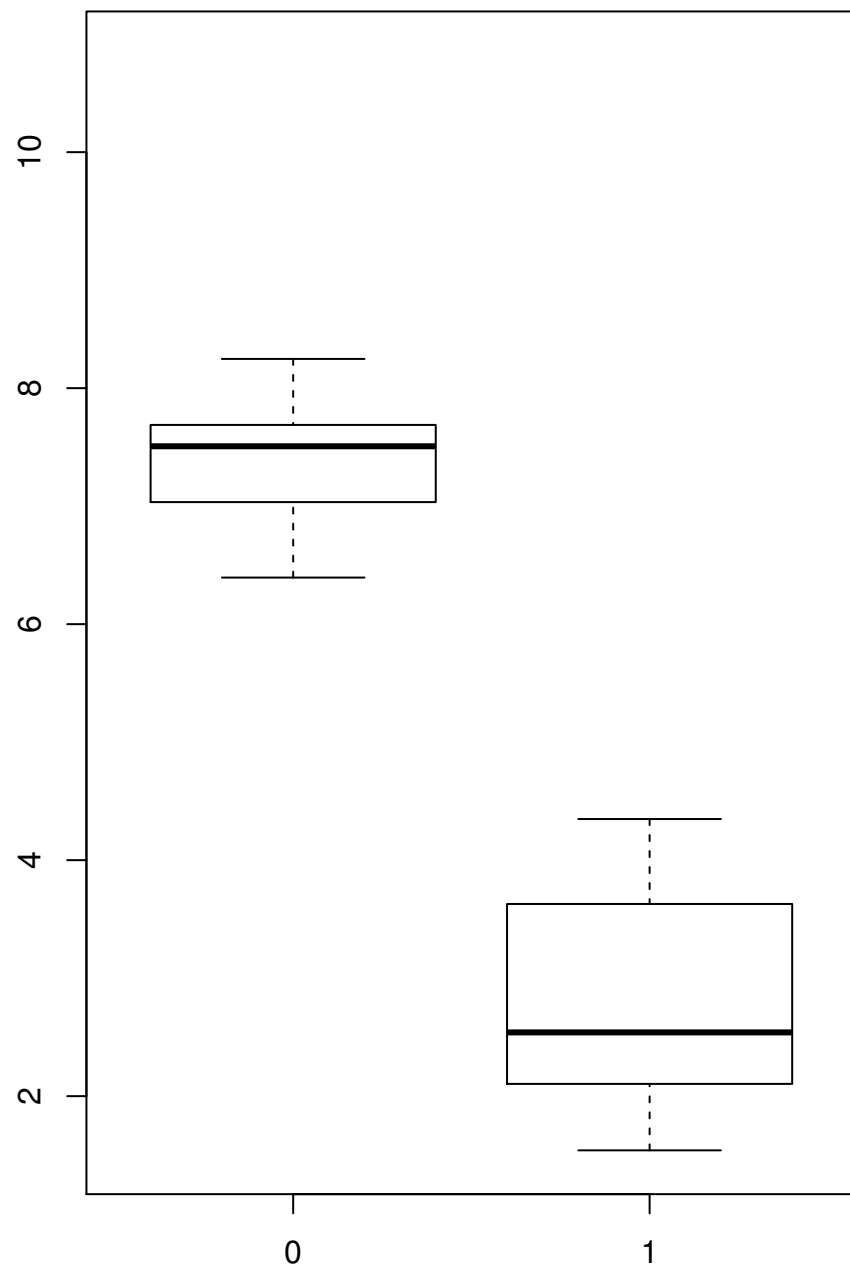

**hsa-miR-30a  
(GSE67139)**

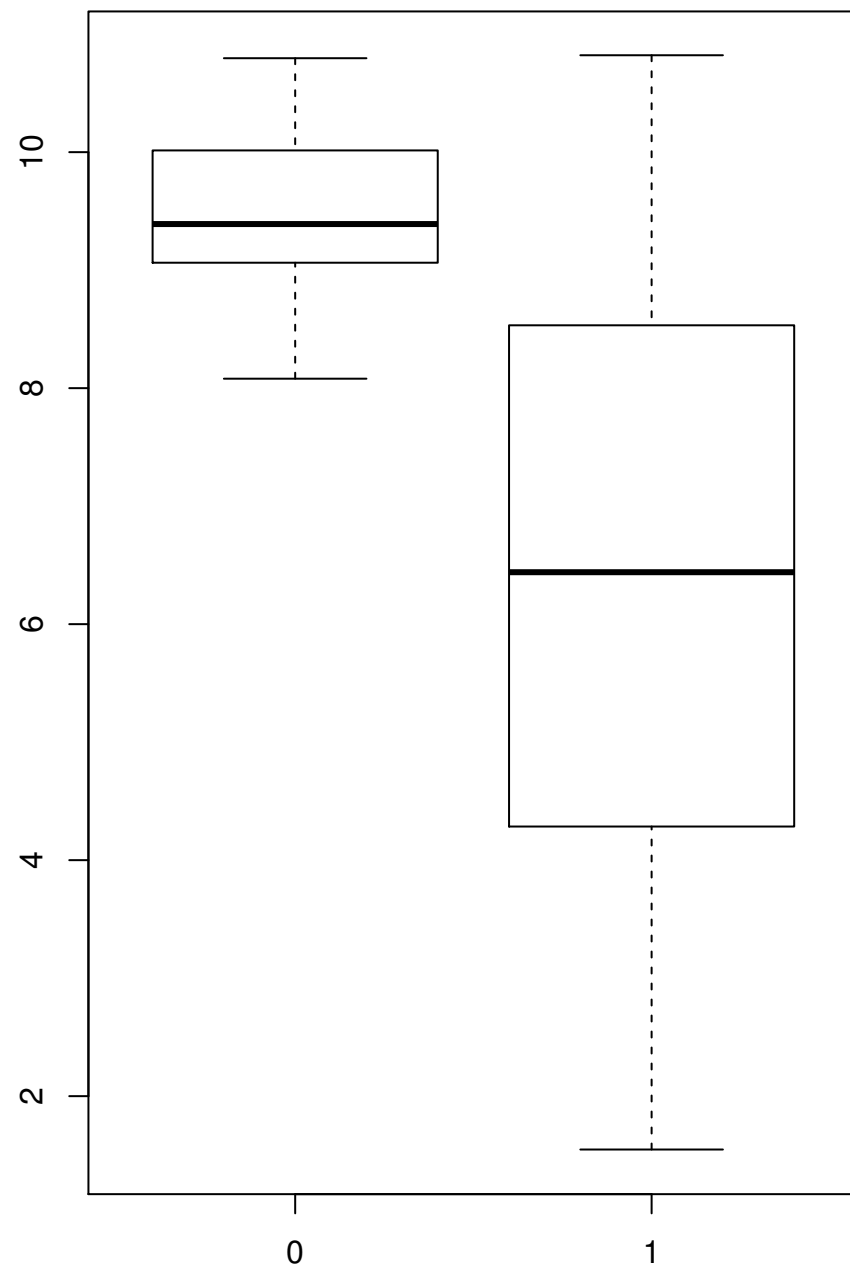

**hsa-miR-30b  
(GSE67138)**

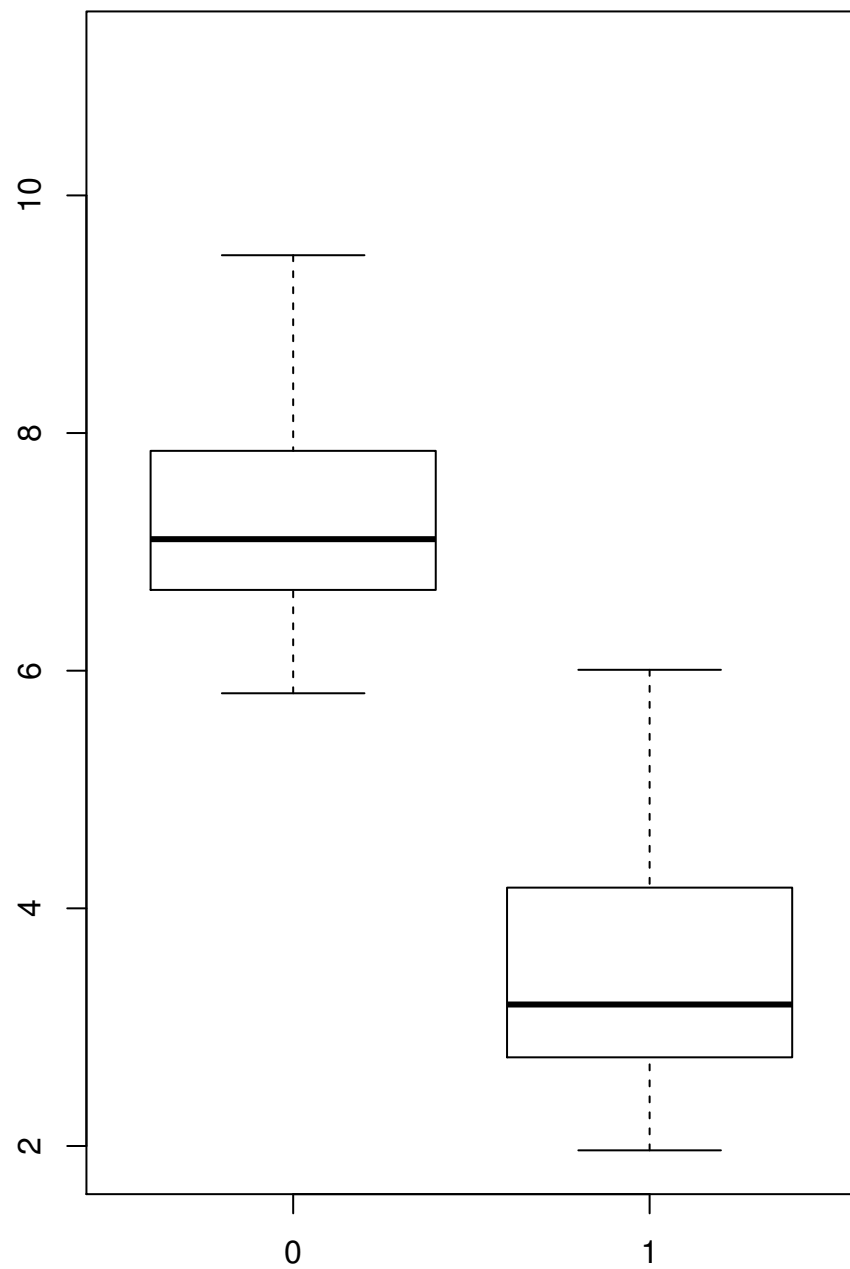

**hsa-miR-30b  
(GSE67139)**

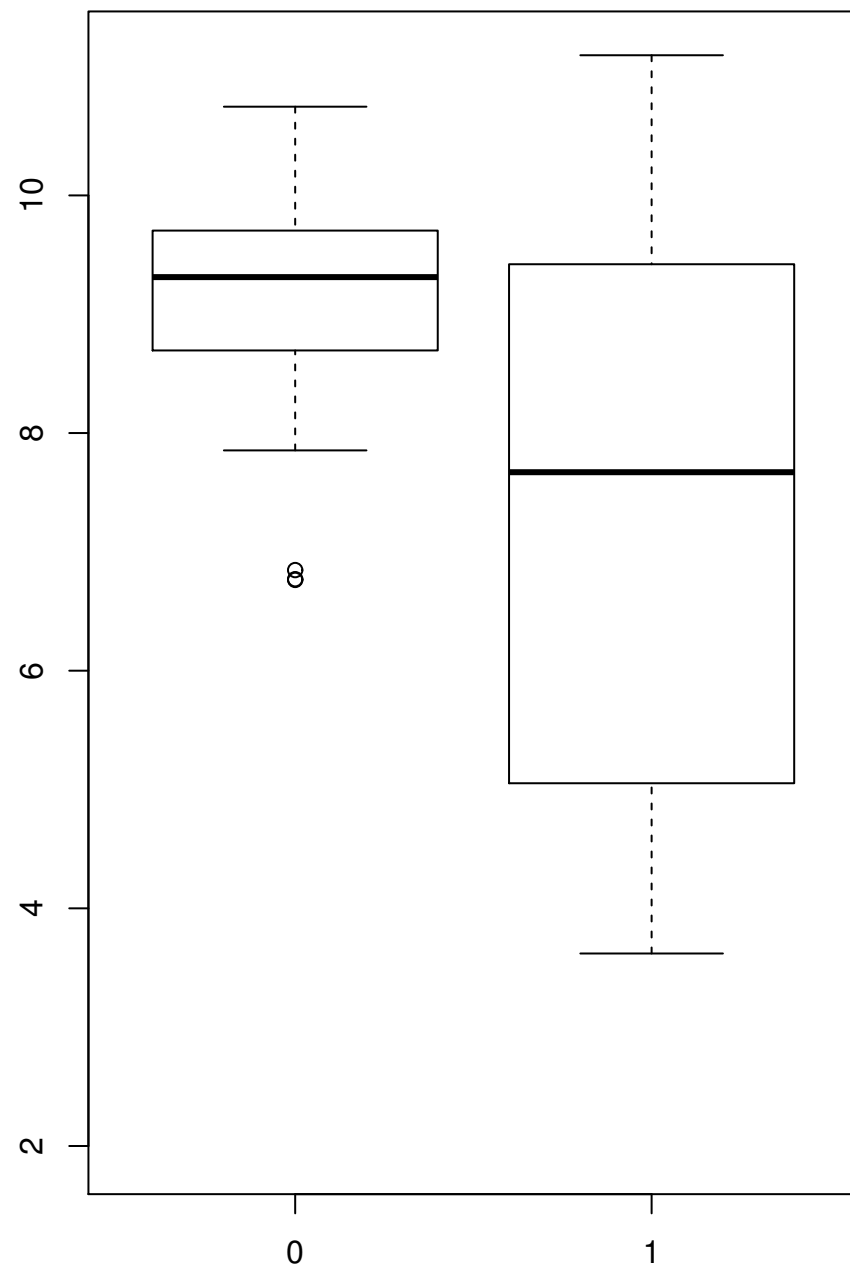

**hsa-miR-30c  
(GSE67138)**

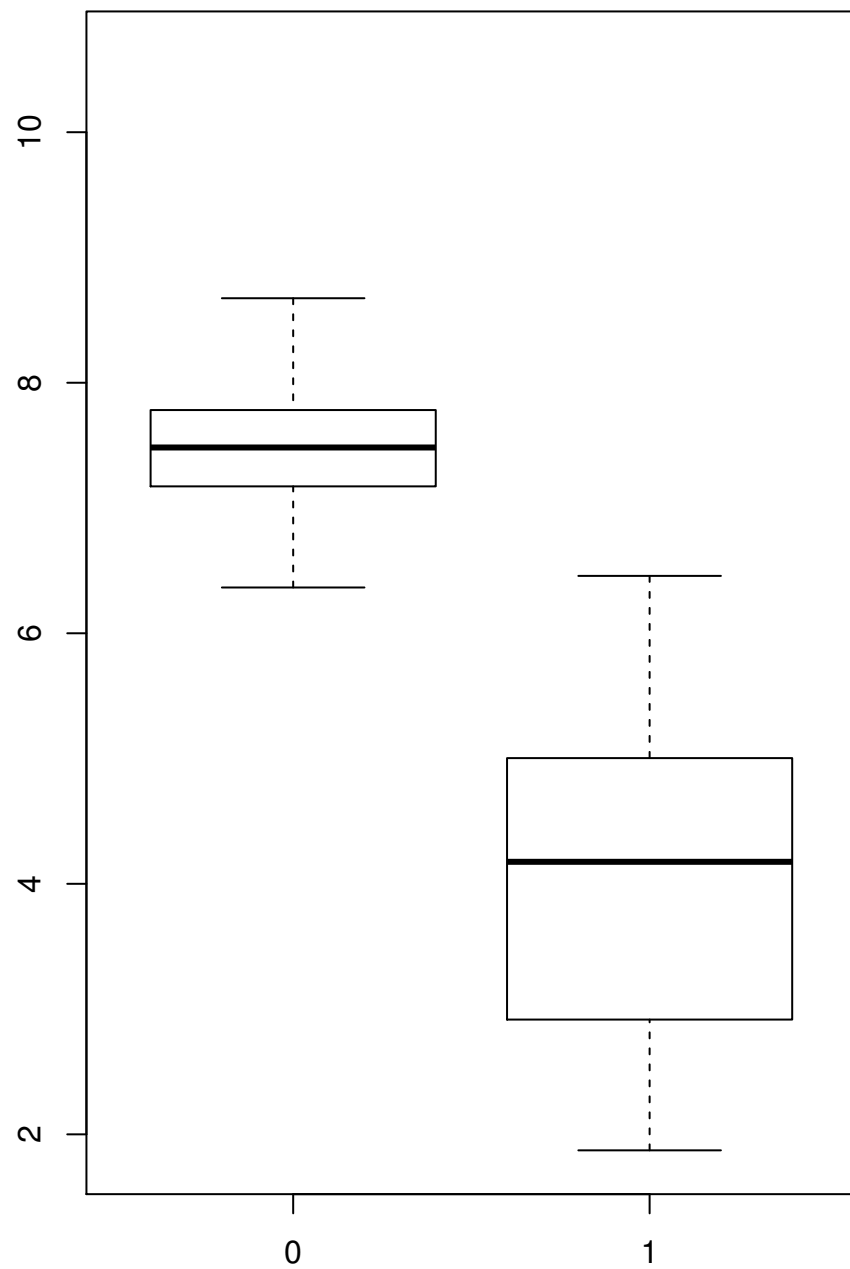

**hsa-miR-30c  
(GSE67139)**

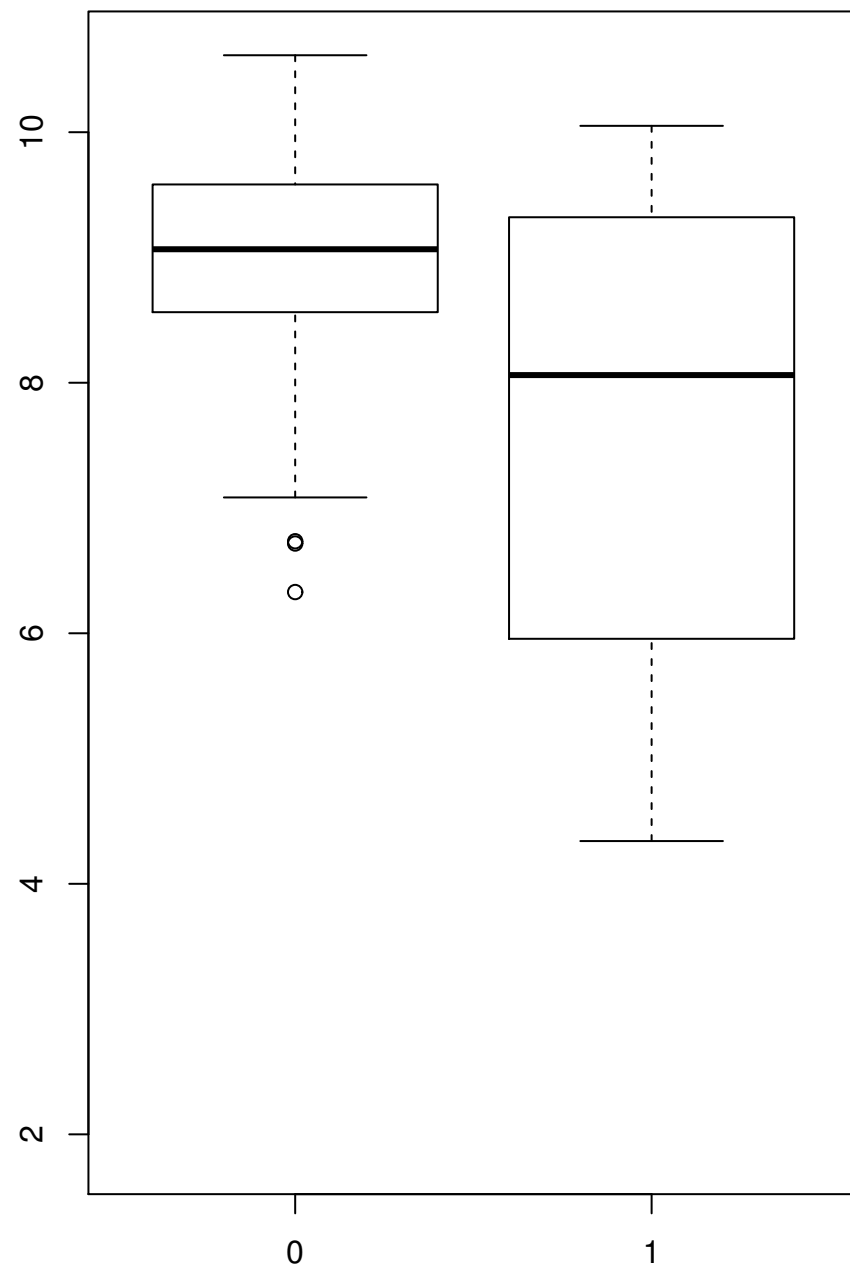

**hsa-miR-30d  
(GSE67138)**

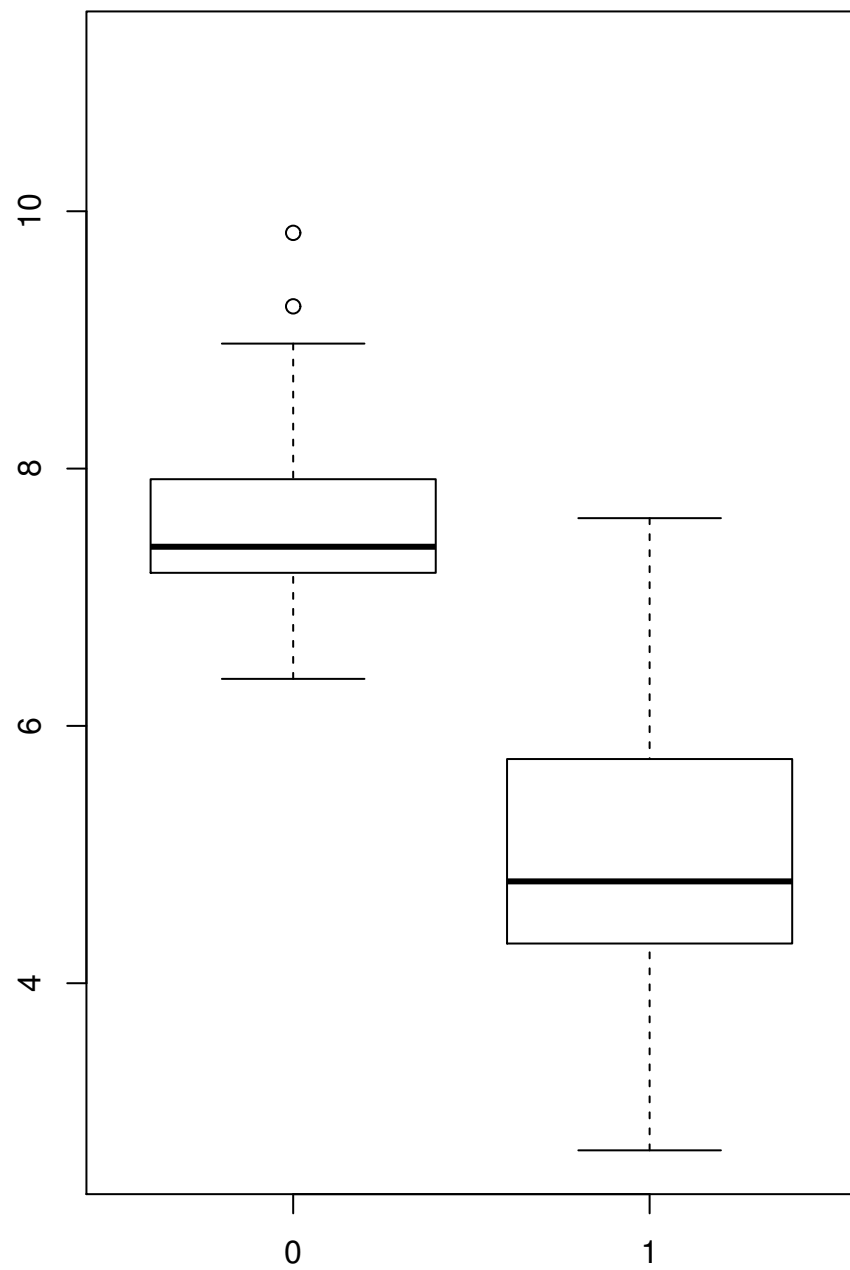

**hsa-miR-30d  
(GSE67139)**

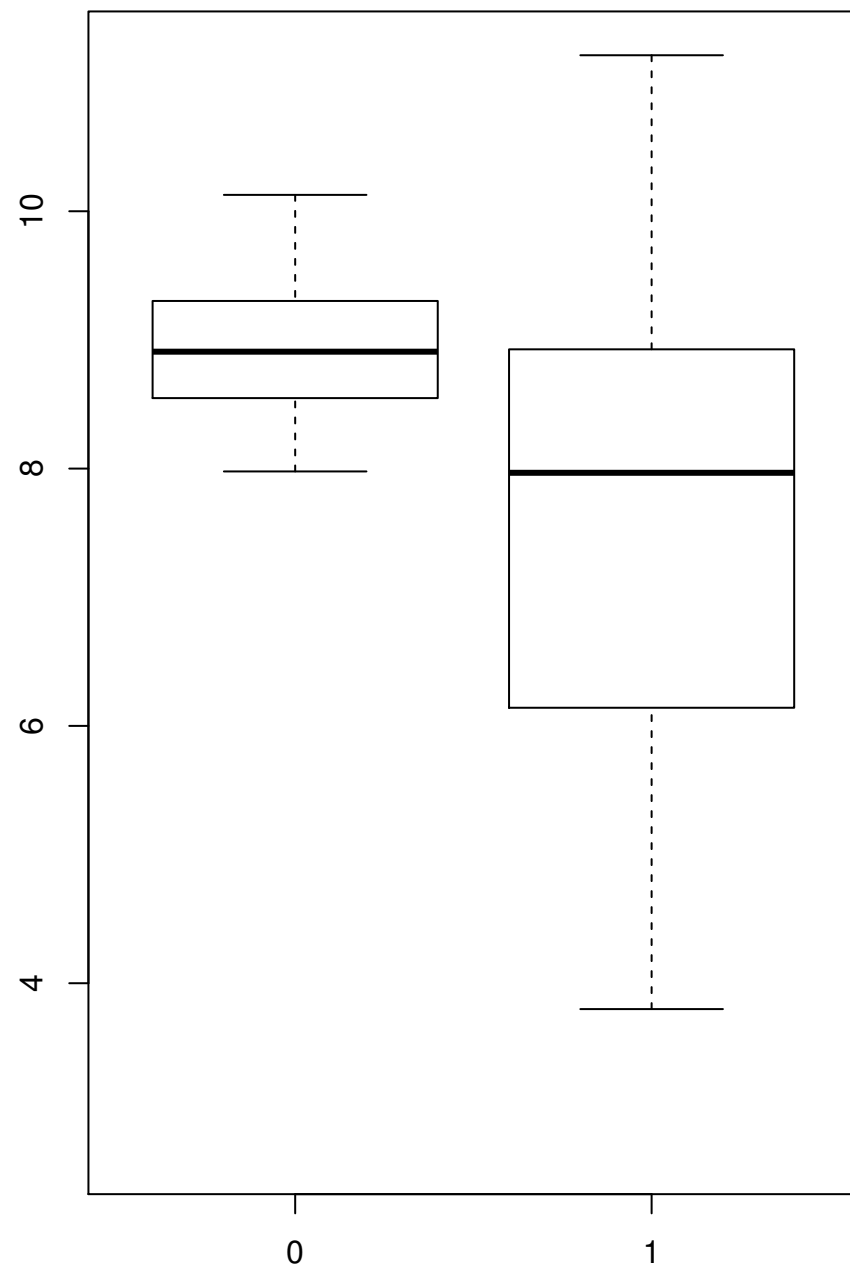

**hsa-miR-34a  
(GSE67138)**

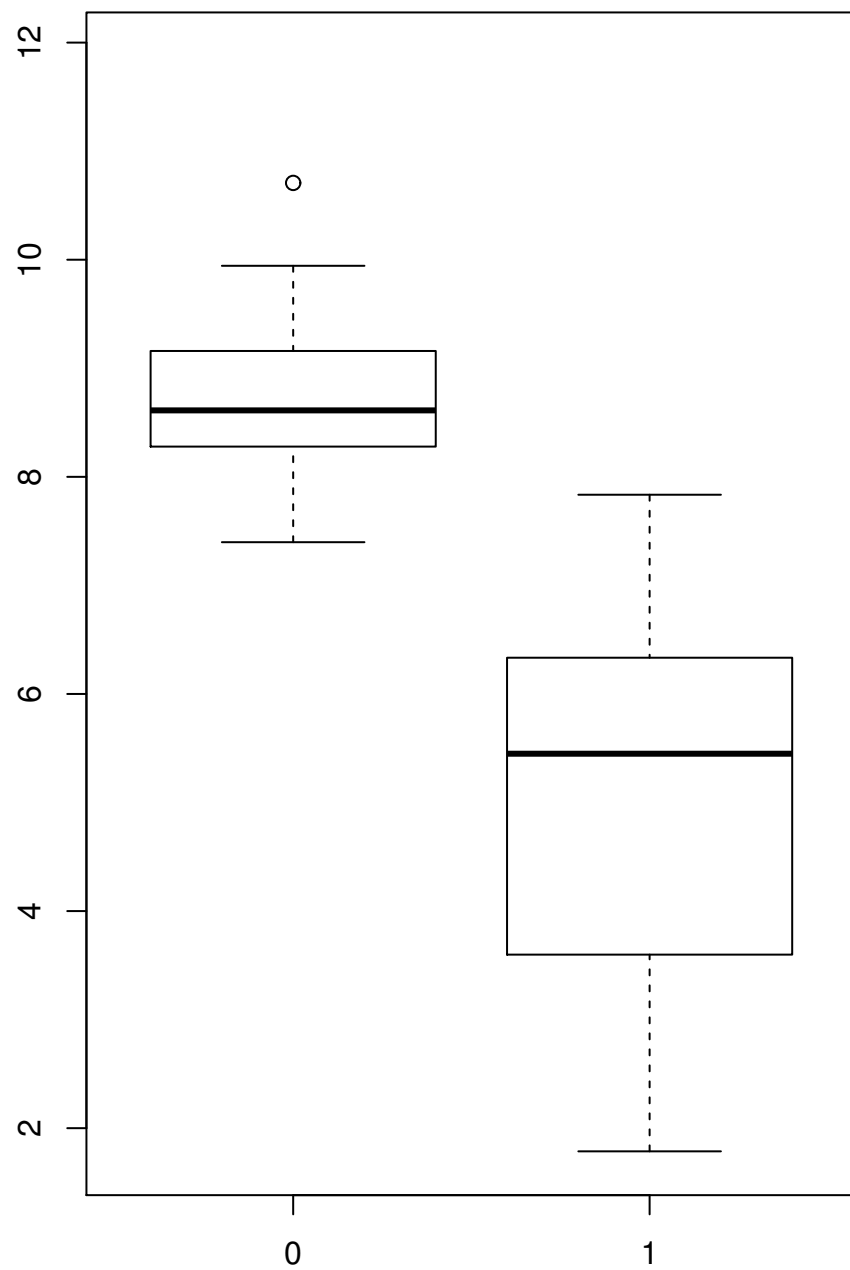

**hsa-miR-34a  
(GSE67139)**

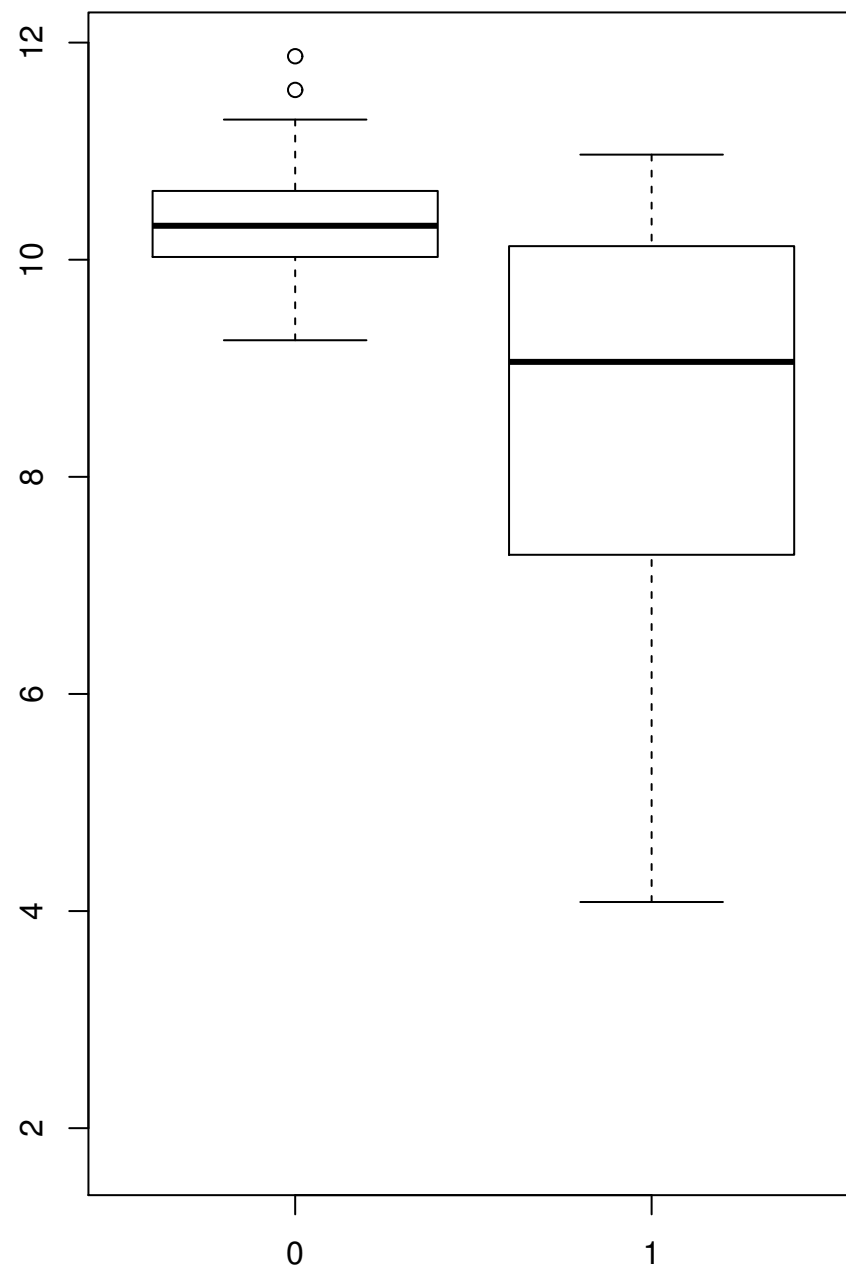

**hsa-miR-361-5p  
(GSE67138)**

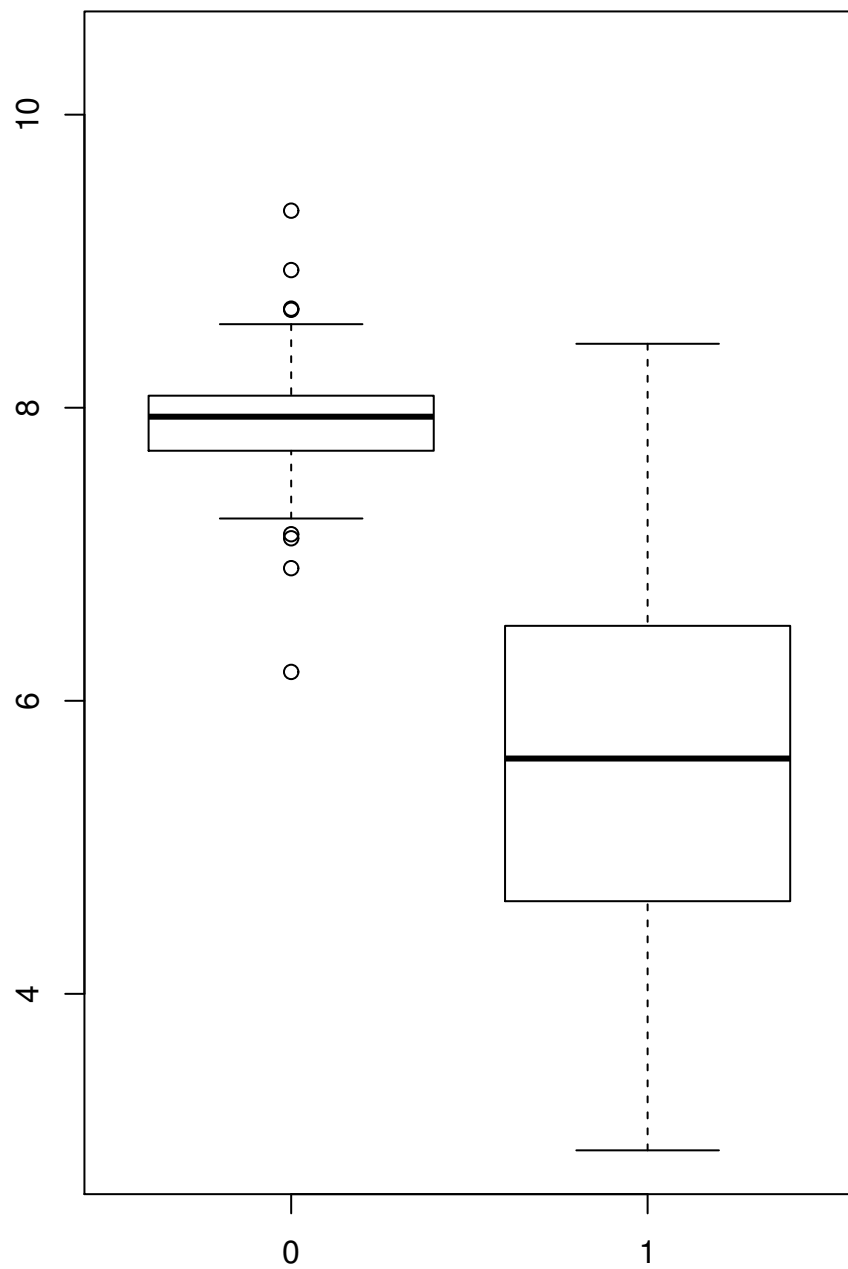

**hsa-miR-361-5p  
(GSE67139)**

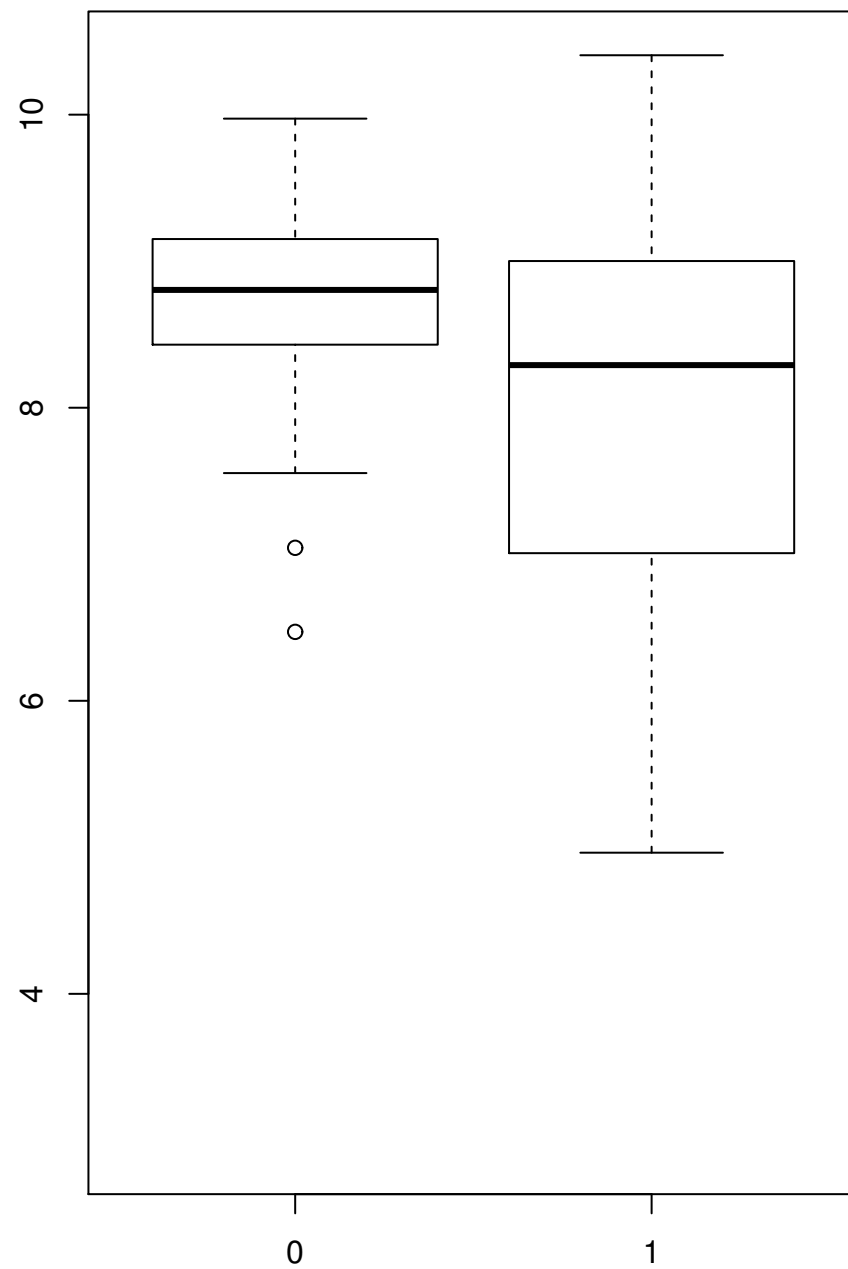



**hsa-miR-362-5p  
(GSE67138)**

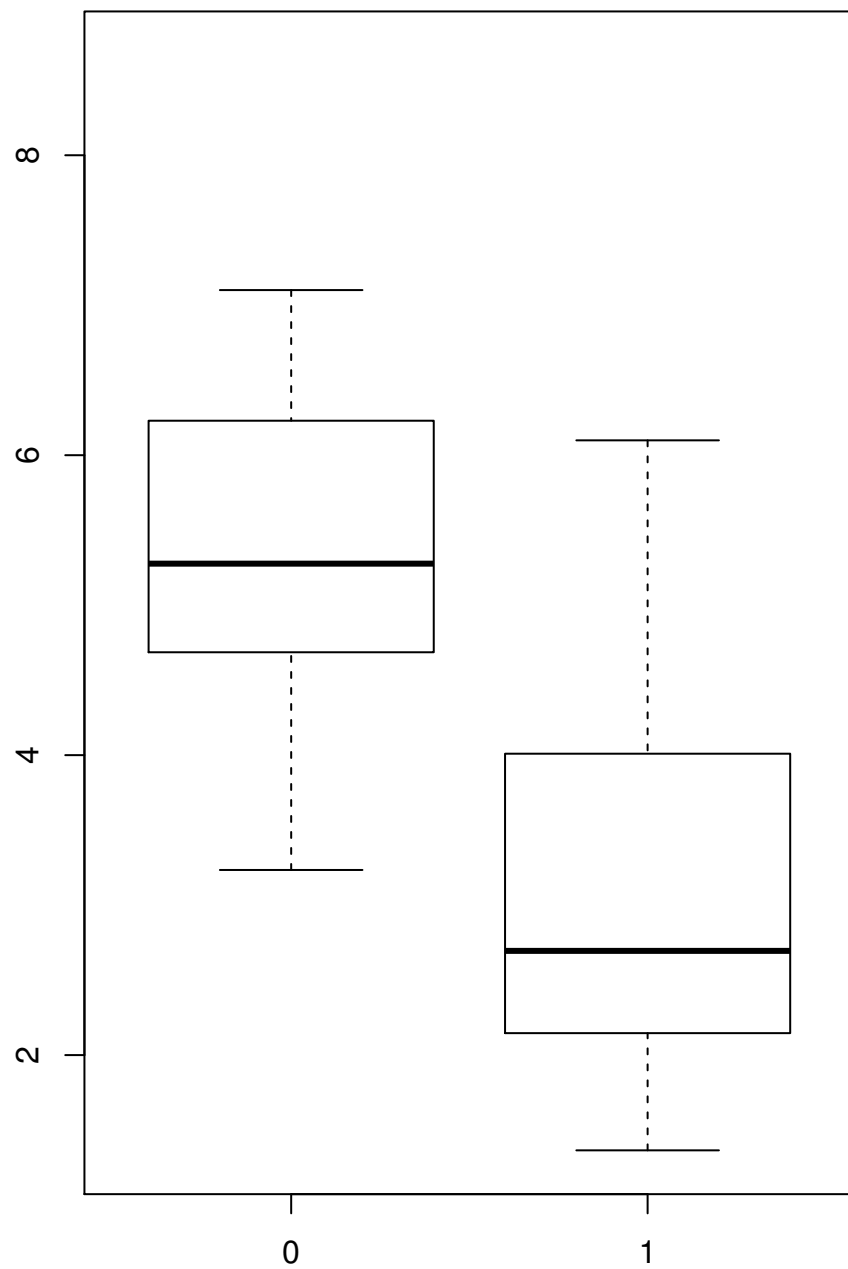

**hsa-miR-362-5p  
(GSE67139)**

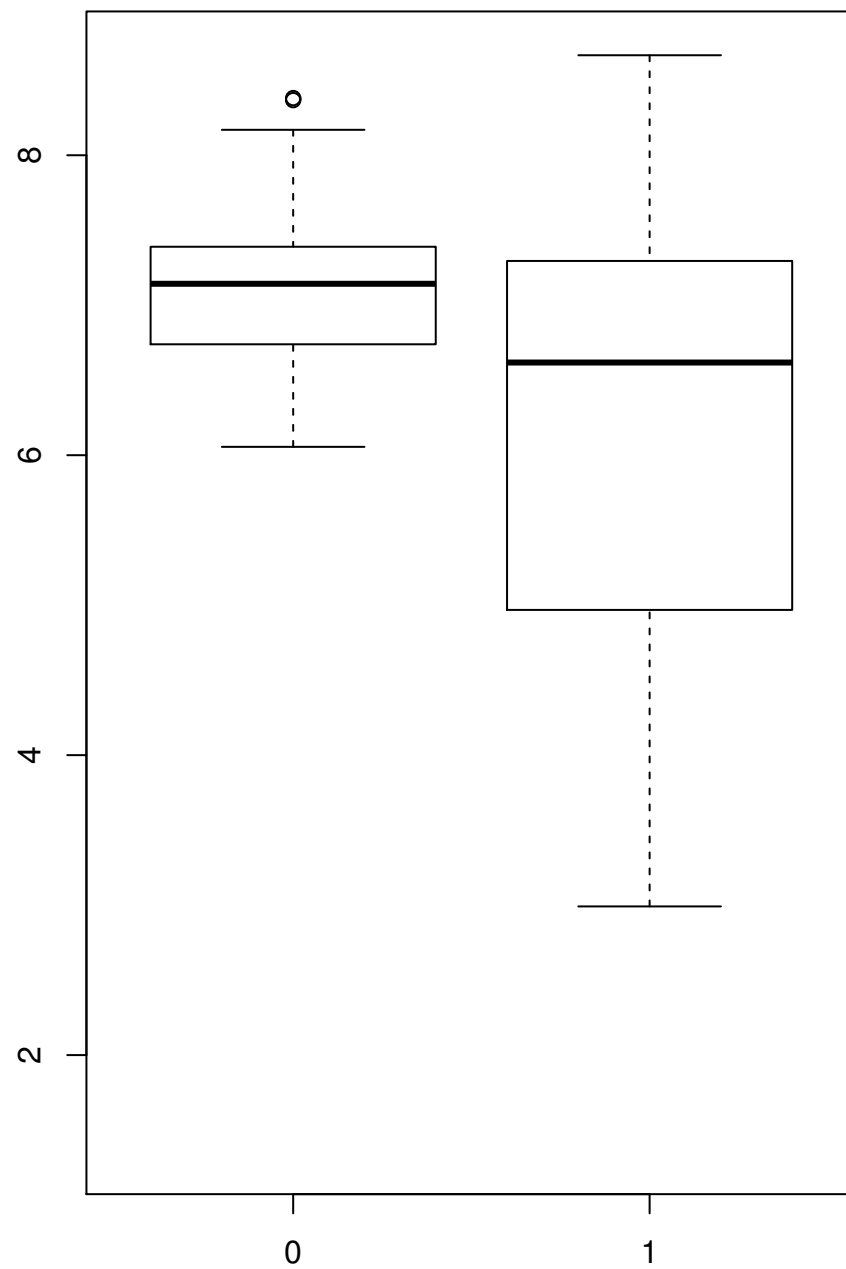

**hsa-miR-425  
(GSE67138)**

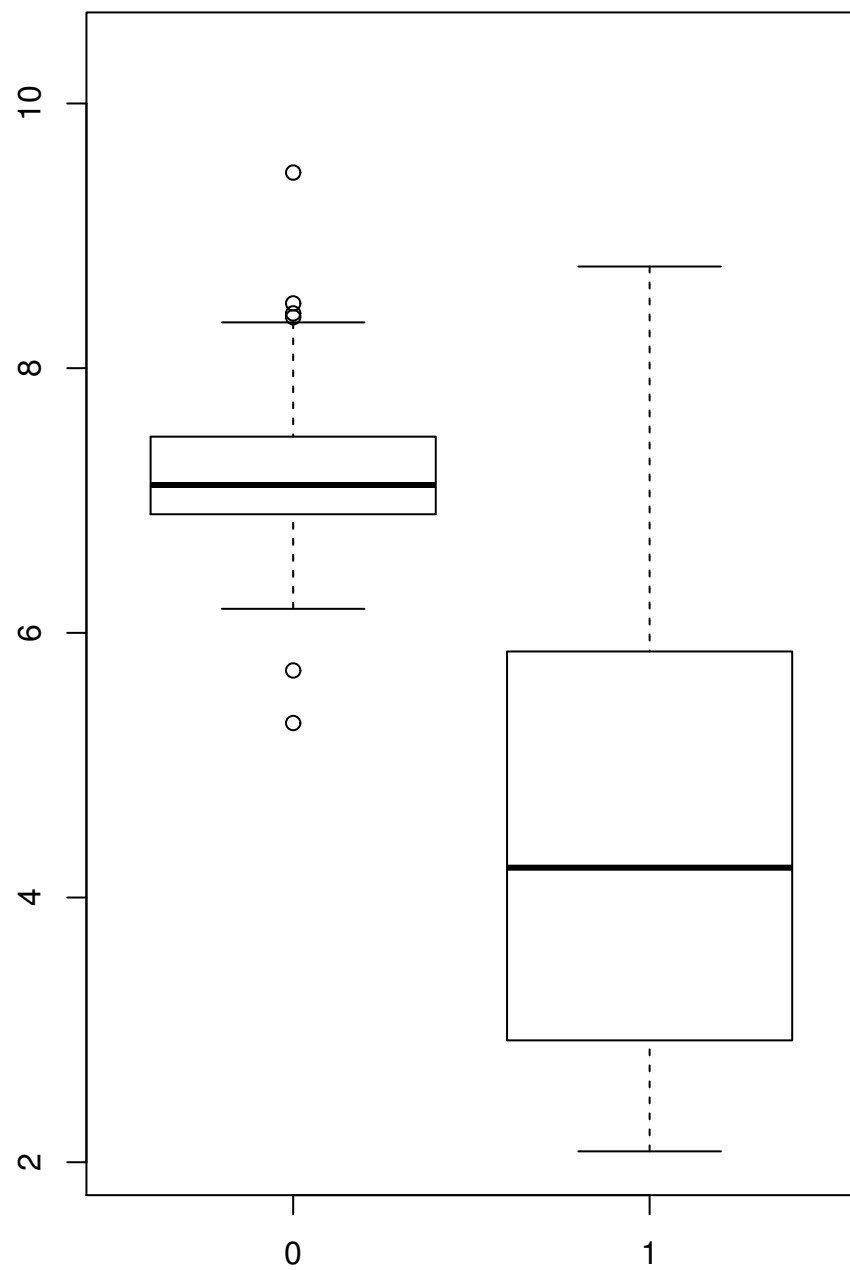

**hsa-miR-425  
(GSE67139)**

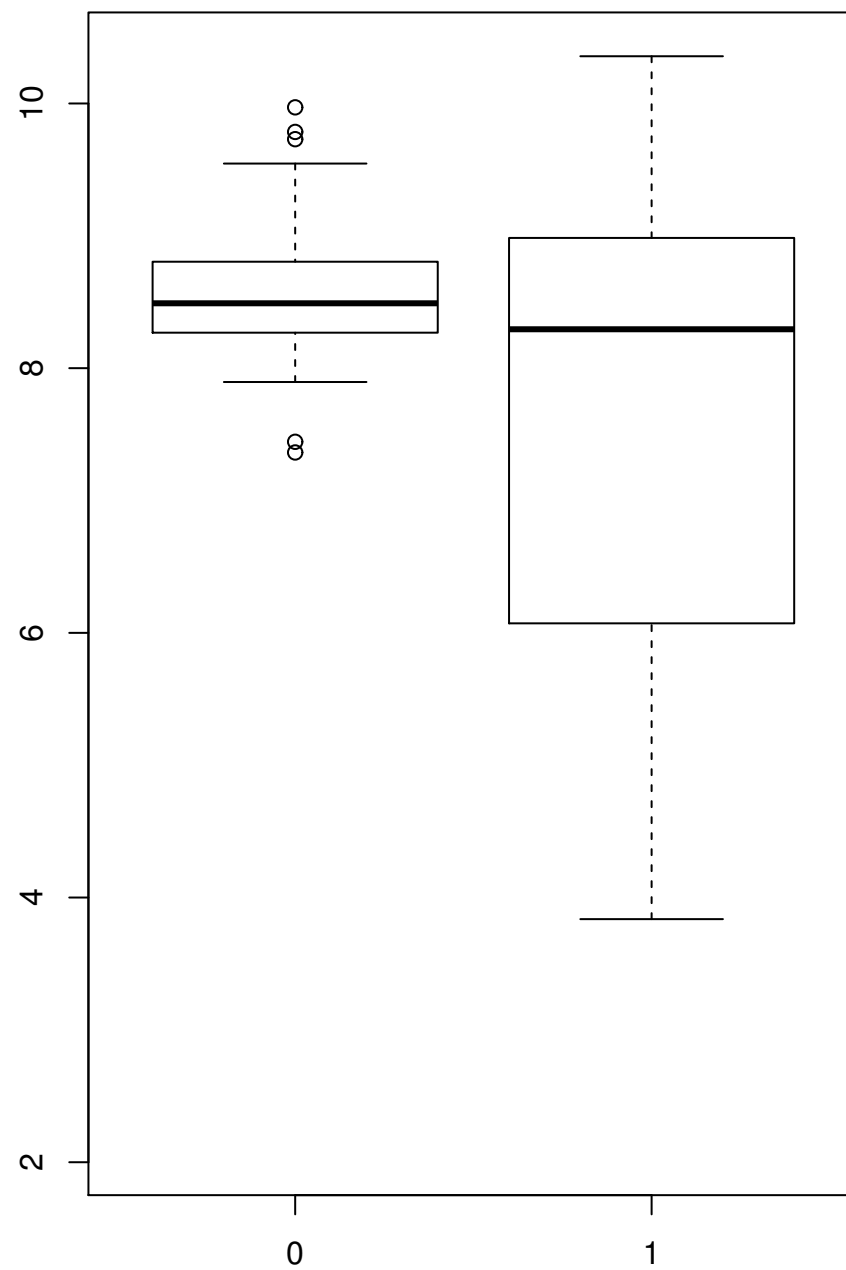

**hsa-miR-500-star  
(GSE67138)**

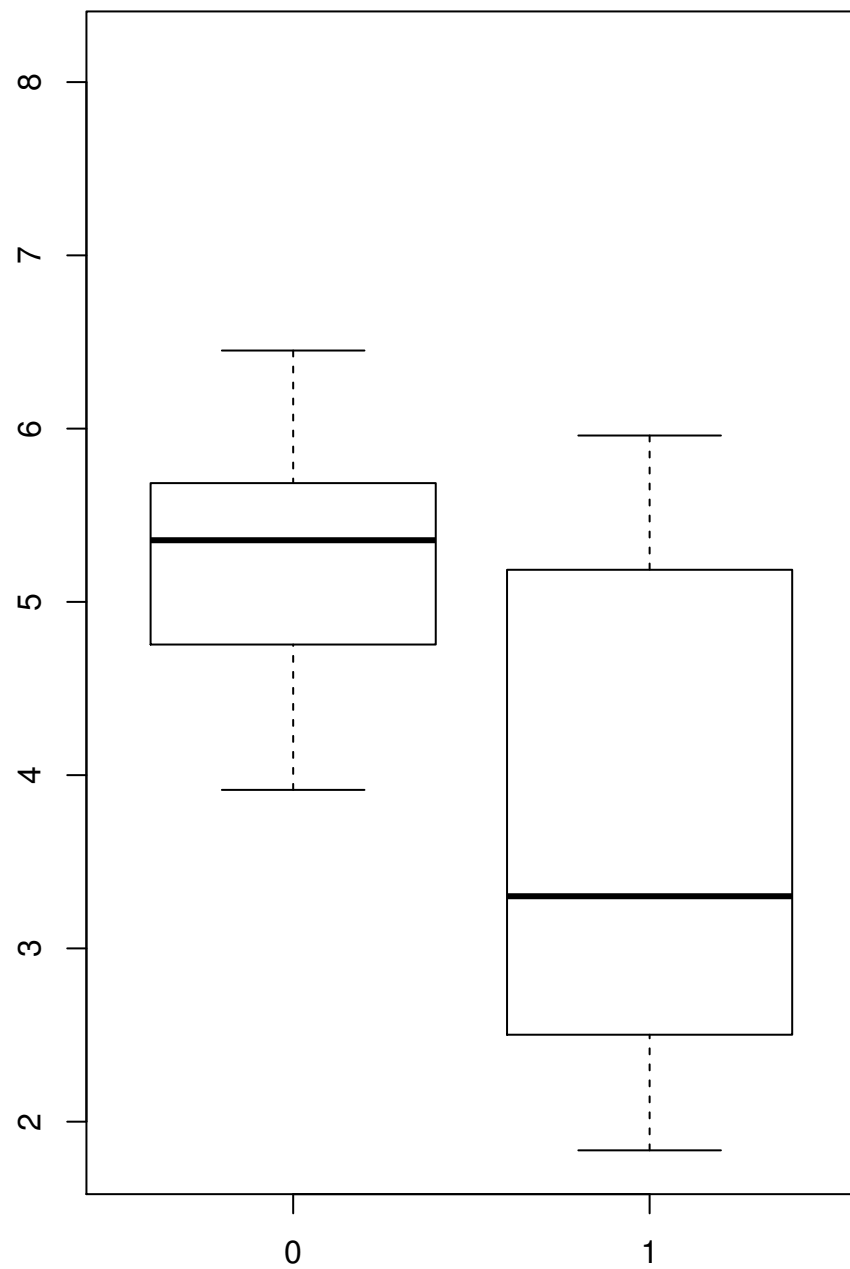

**hsa-miR-500-star  
(GSE67139)**

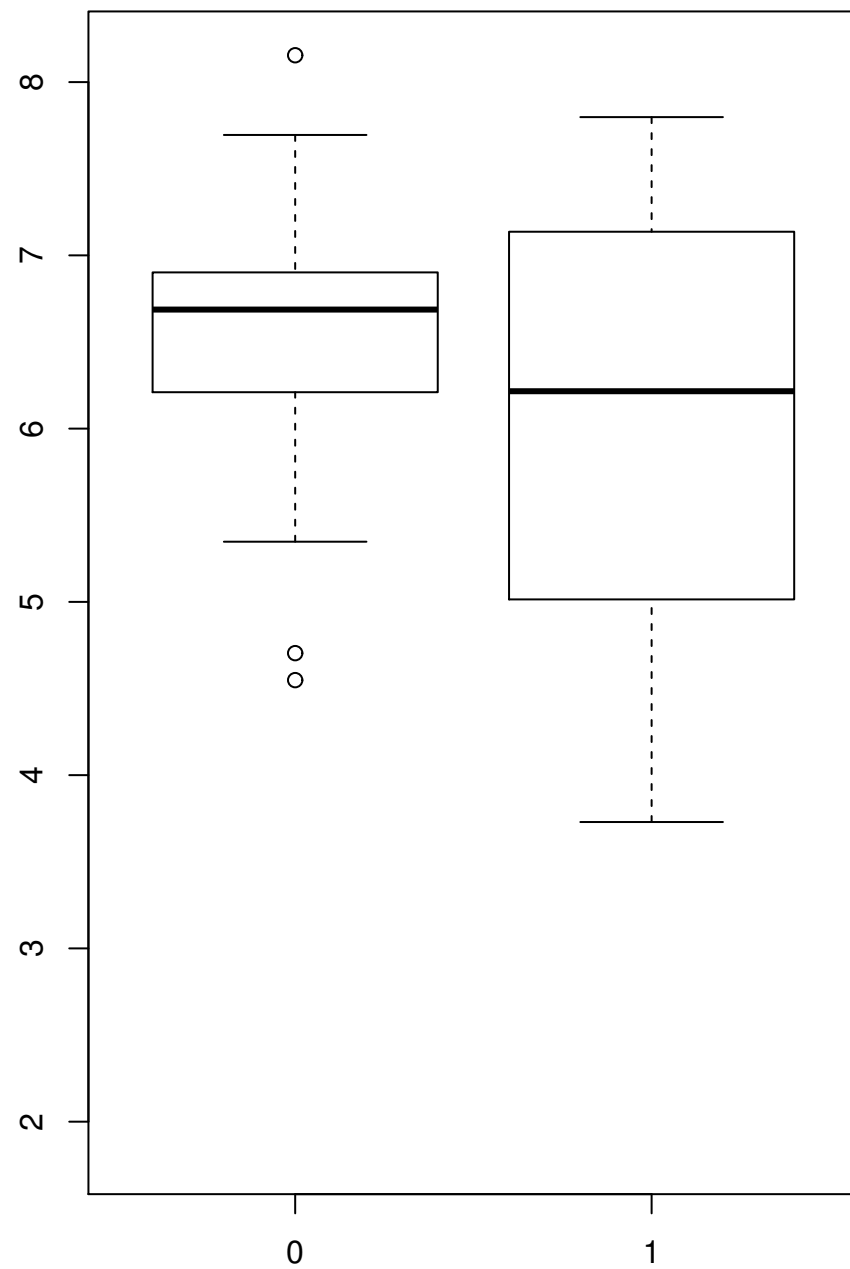

**hsa-miR-532-5p  
(GSE67138)**

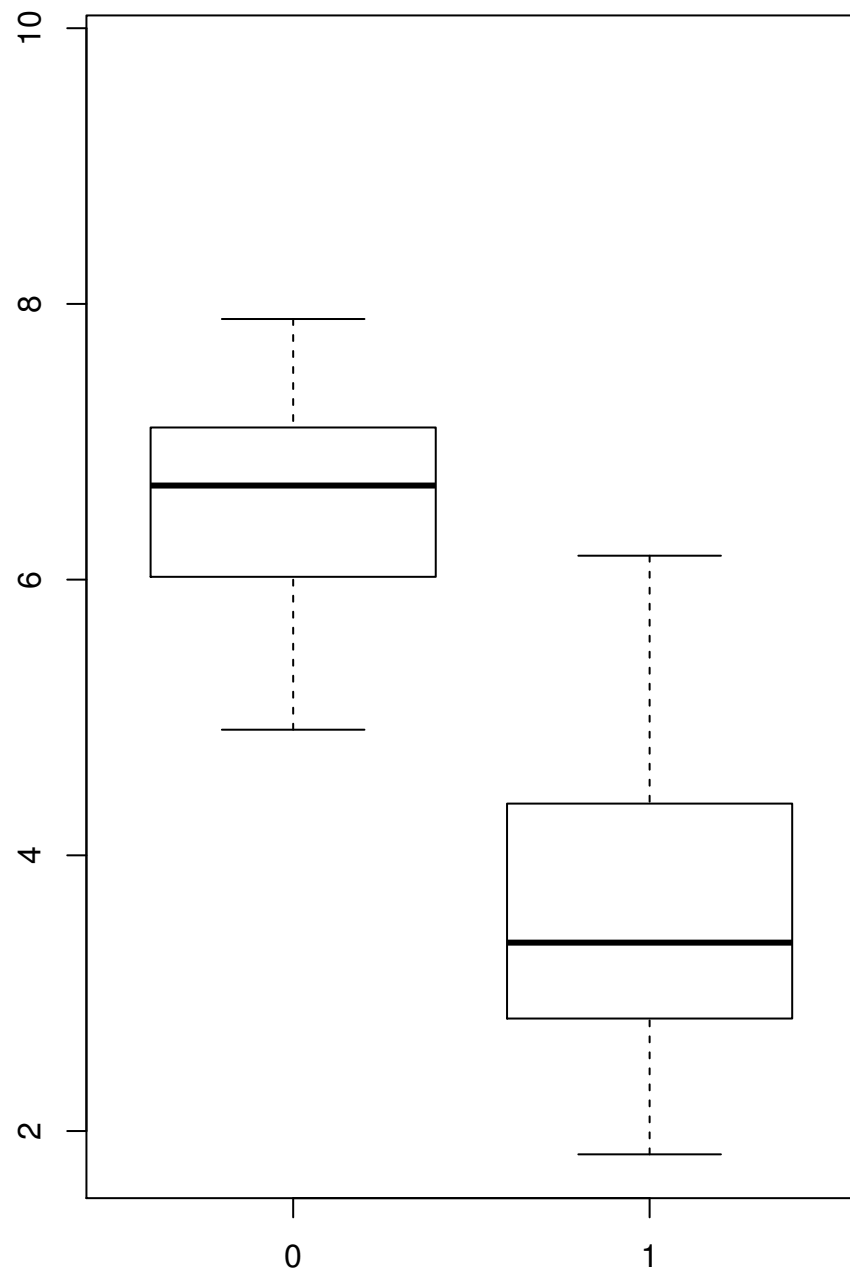

**hsa-miR-532-5p  
(GSE67139)**

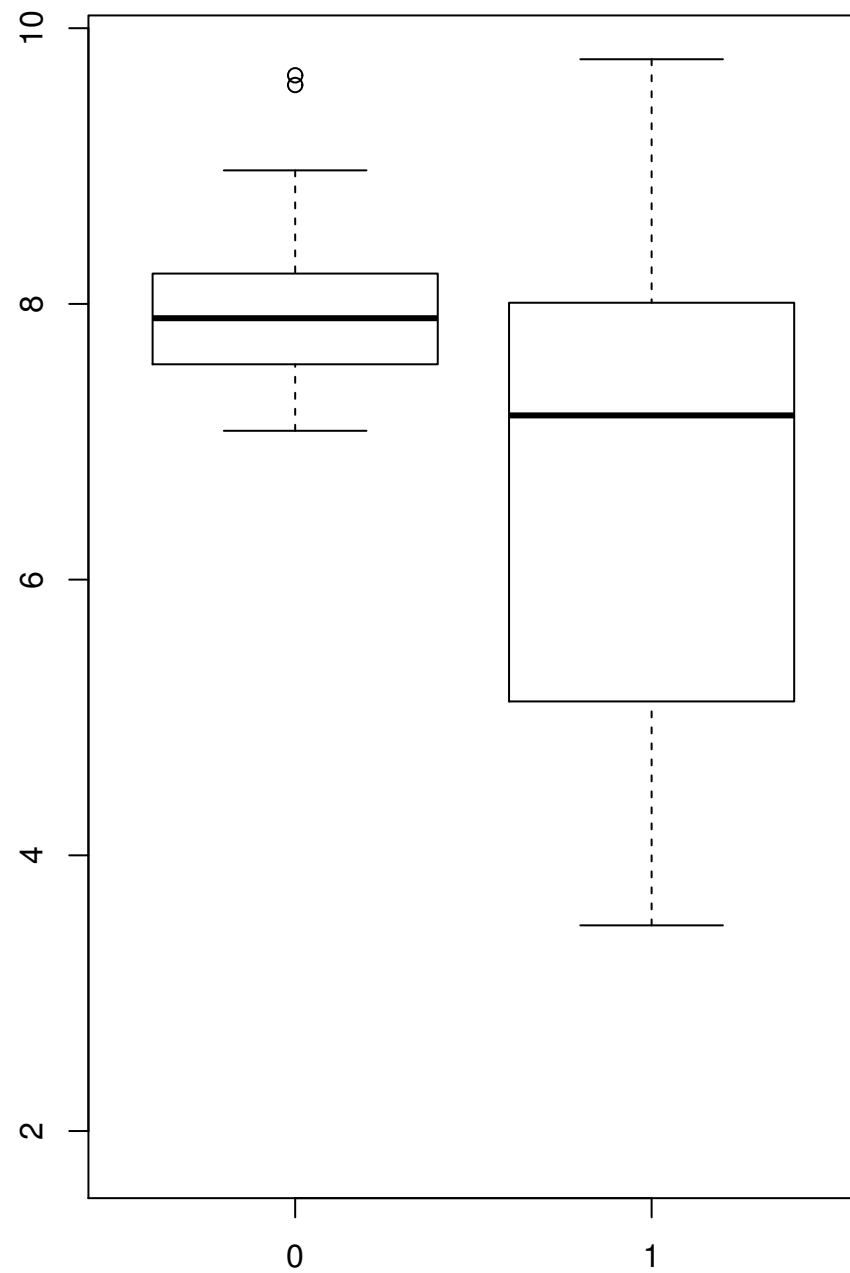

**hsa-miR-572  
(GSE67138)**

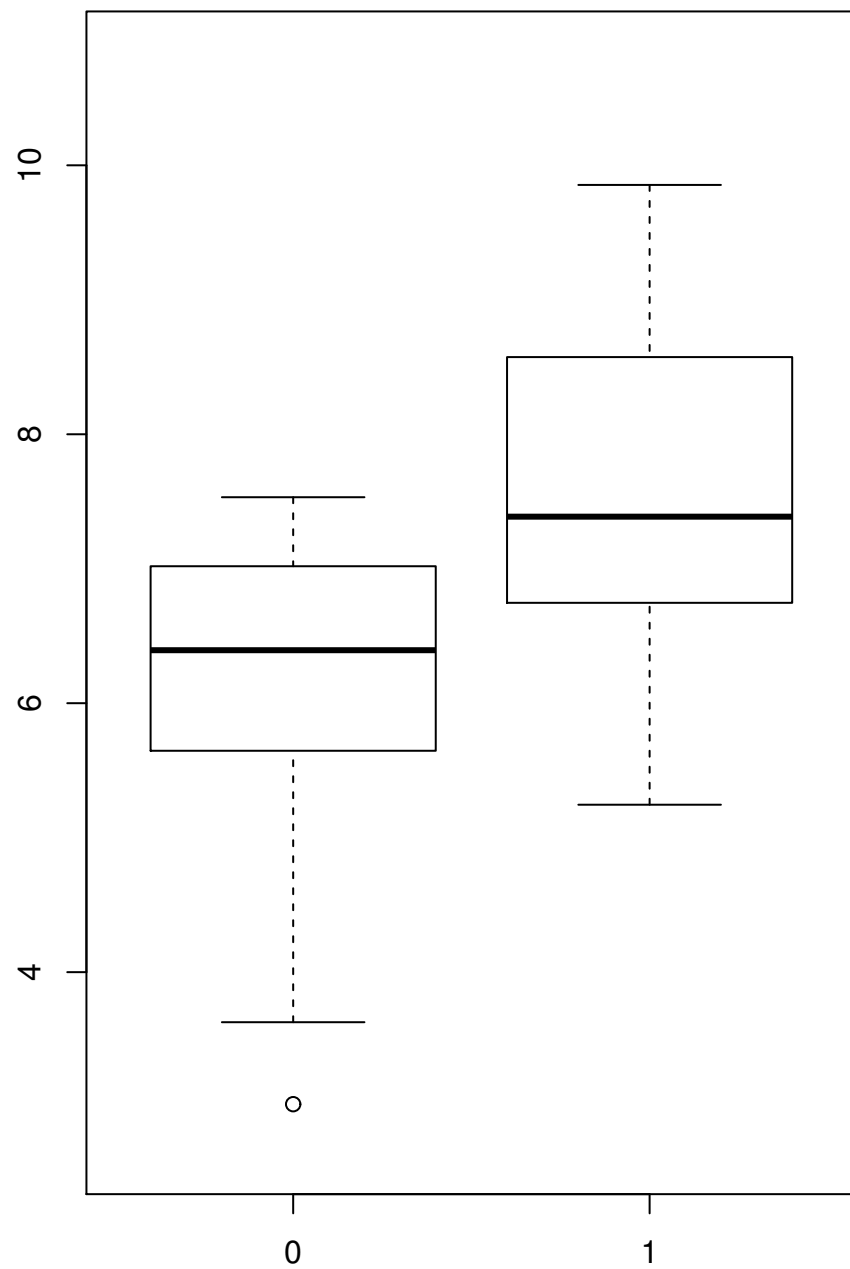

**hsa-miR-572  
(GSE67139)**

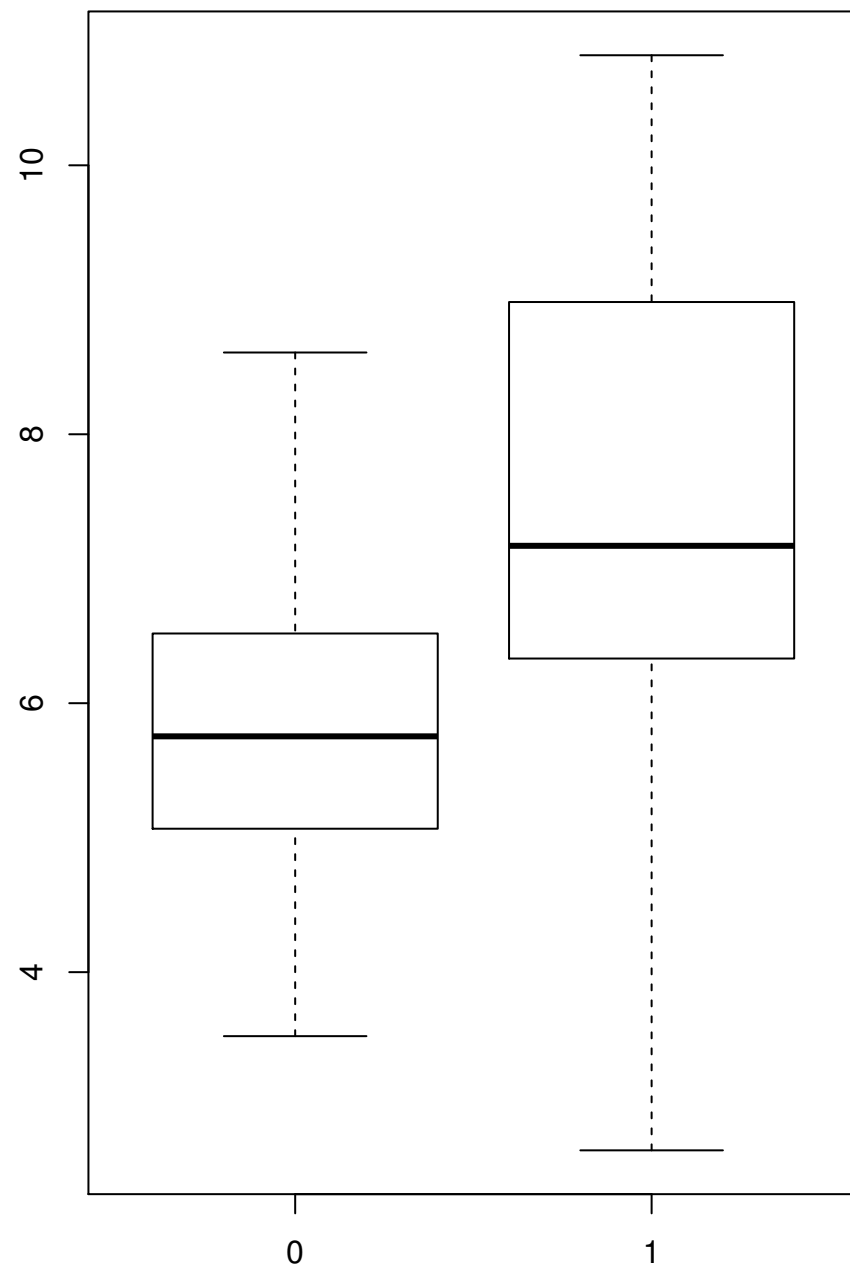

**hsa-miR-575  
(GSE67138)**

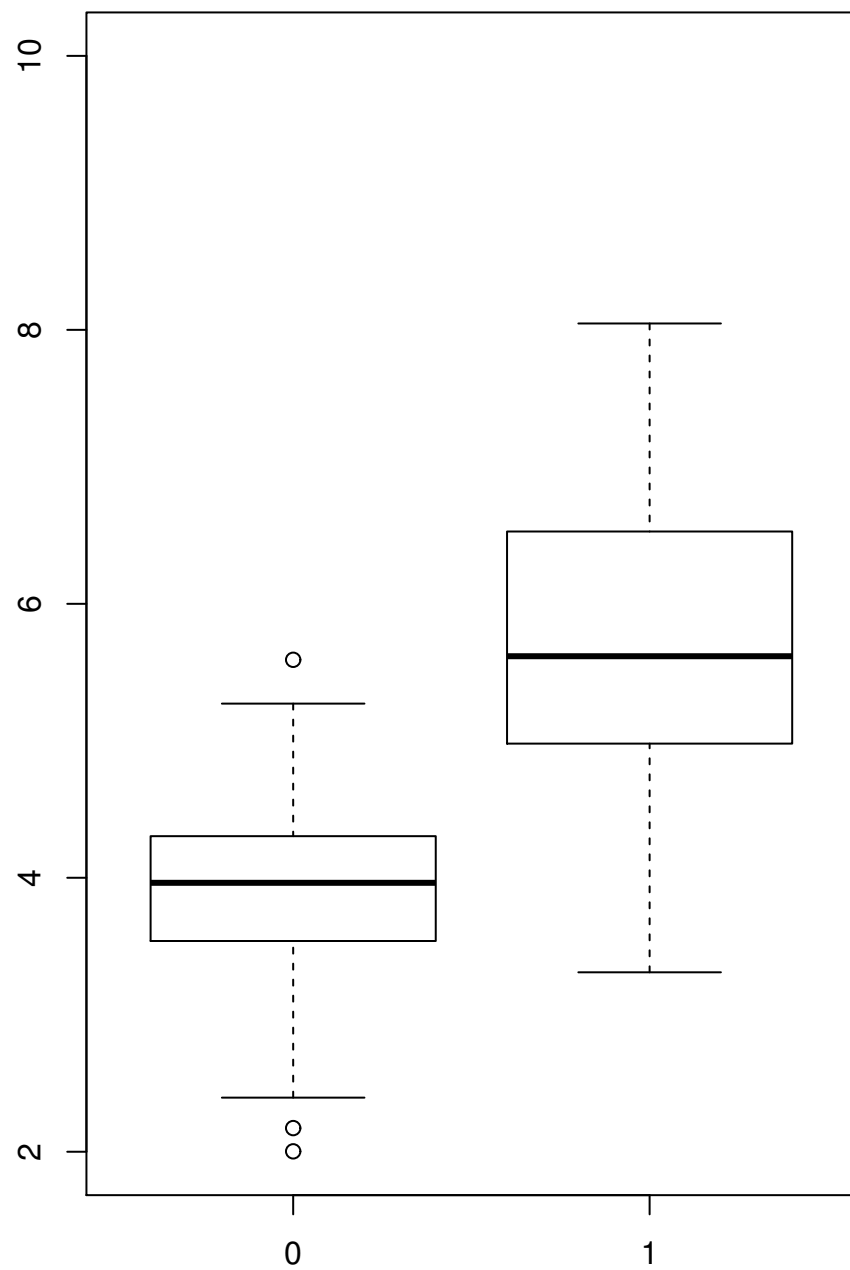

**hsa-miR-575  
(GSE67139)**

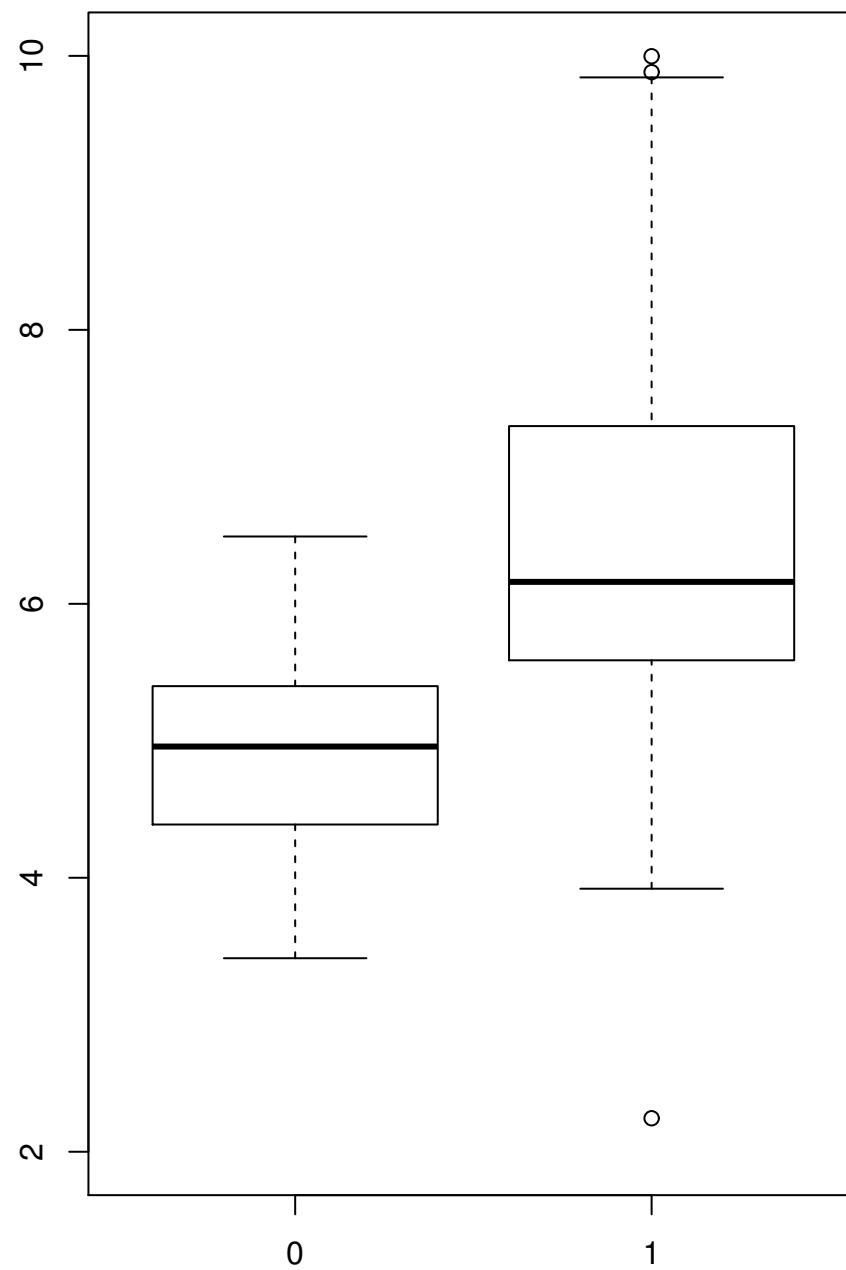

**hsa-miR-595  
(GSE67138)**

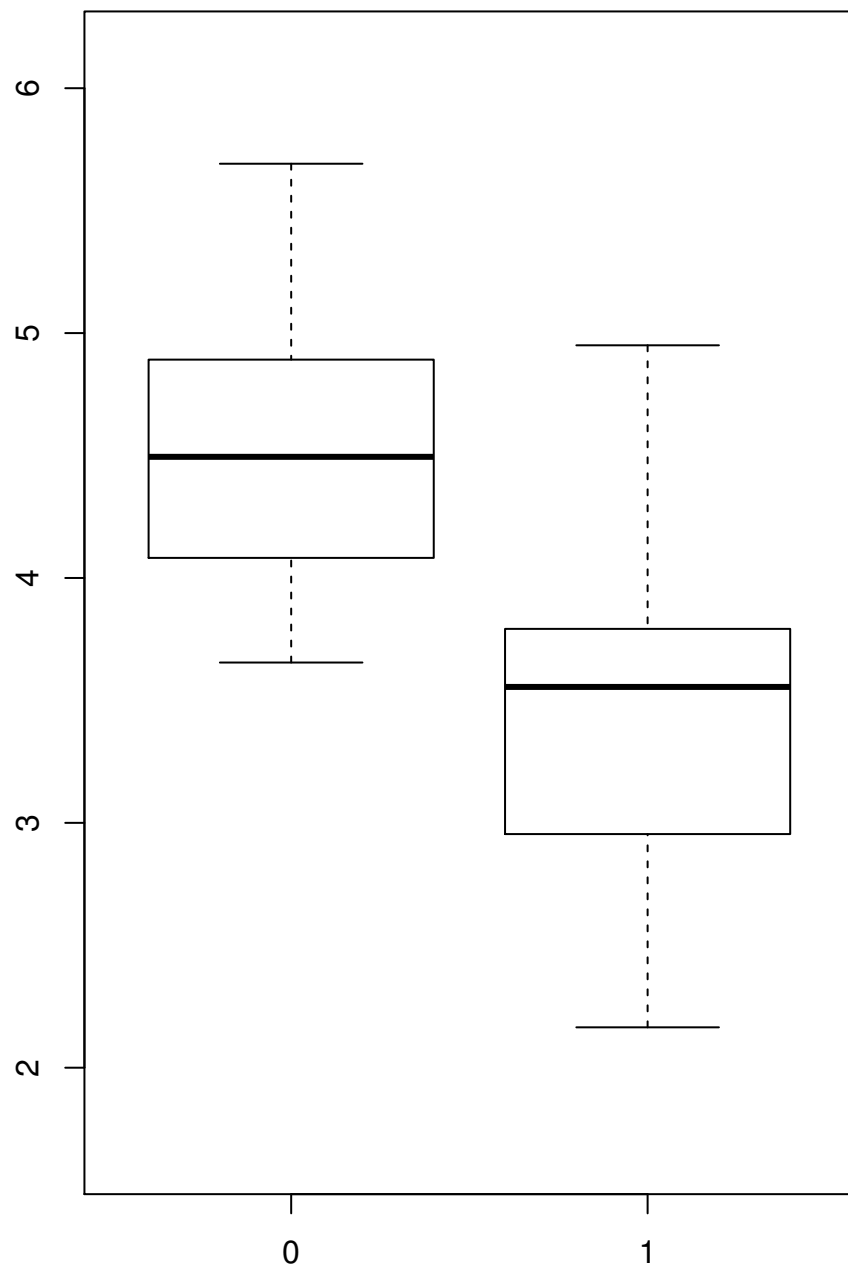

**hsa-miR-595  
(GSE67139)**

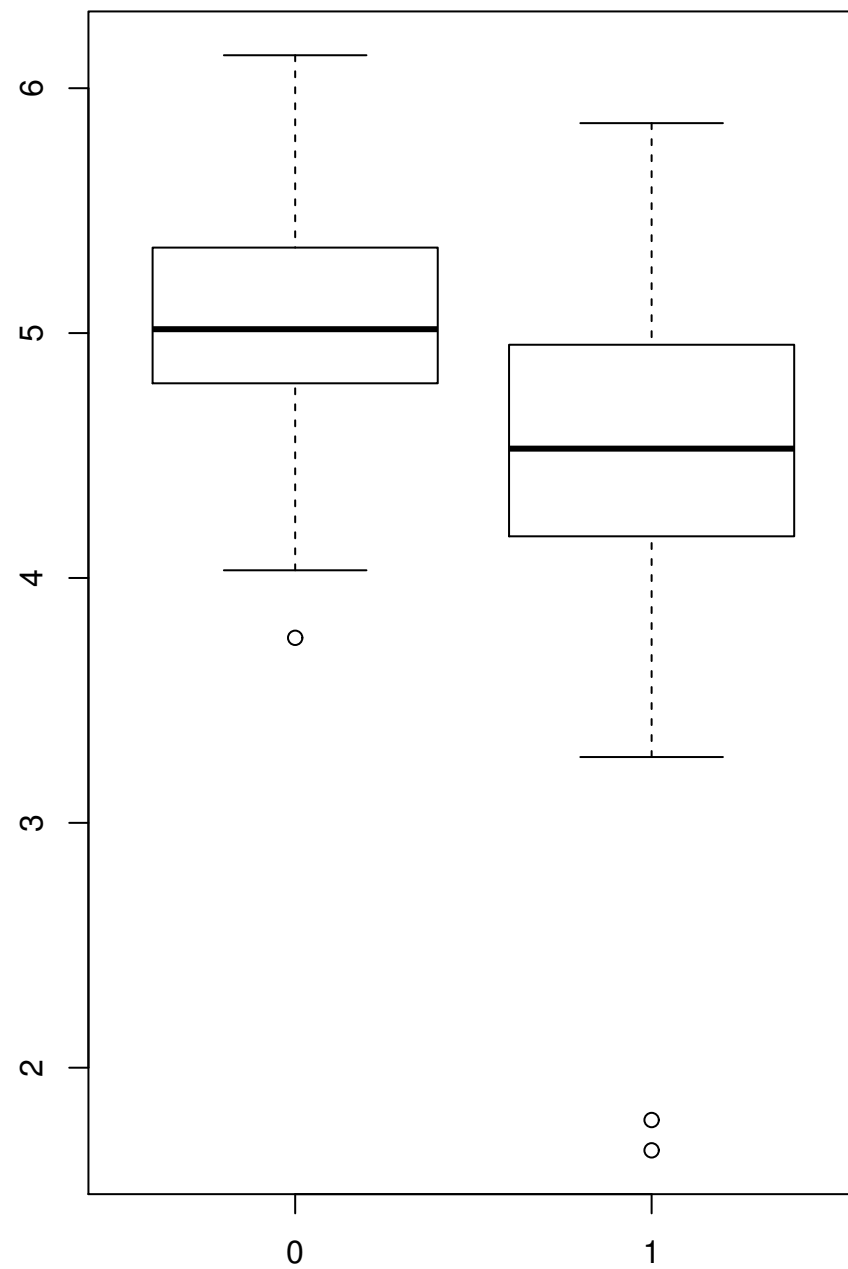

**hsa-miR-652  
(GSE67138)**

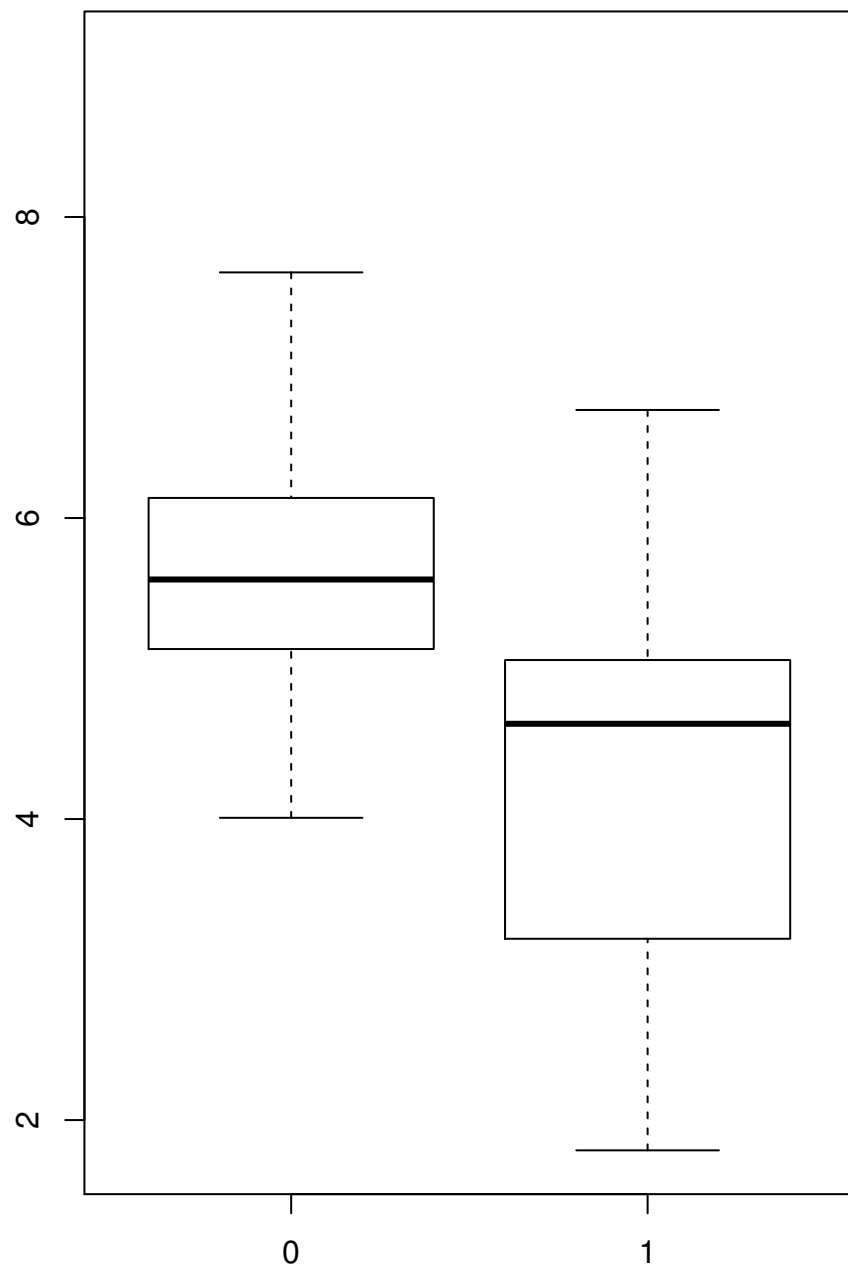

**hsa-miR-652  
(GSE67139)**

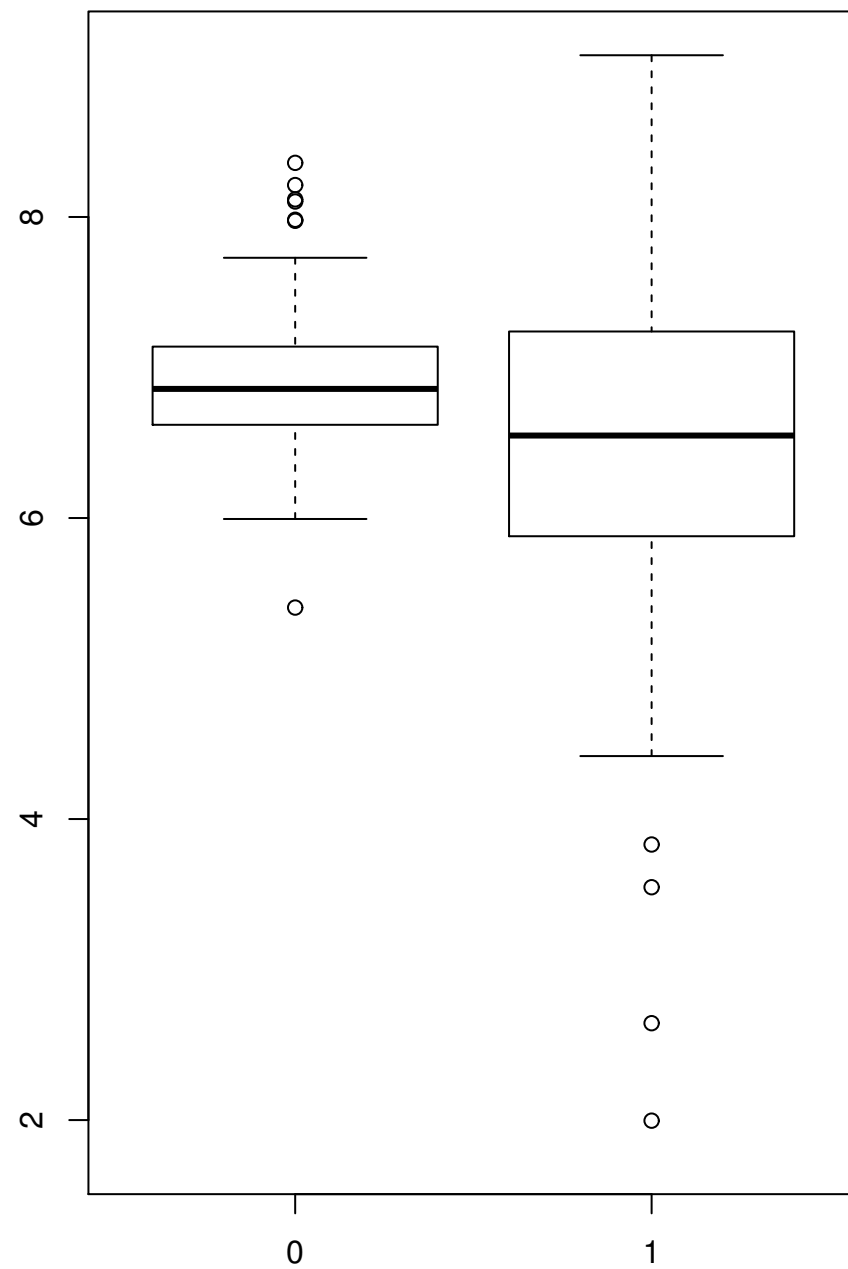



hsa-miR-671-5p  
(GSE67138)

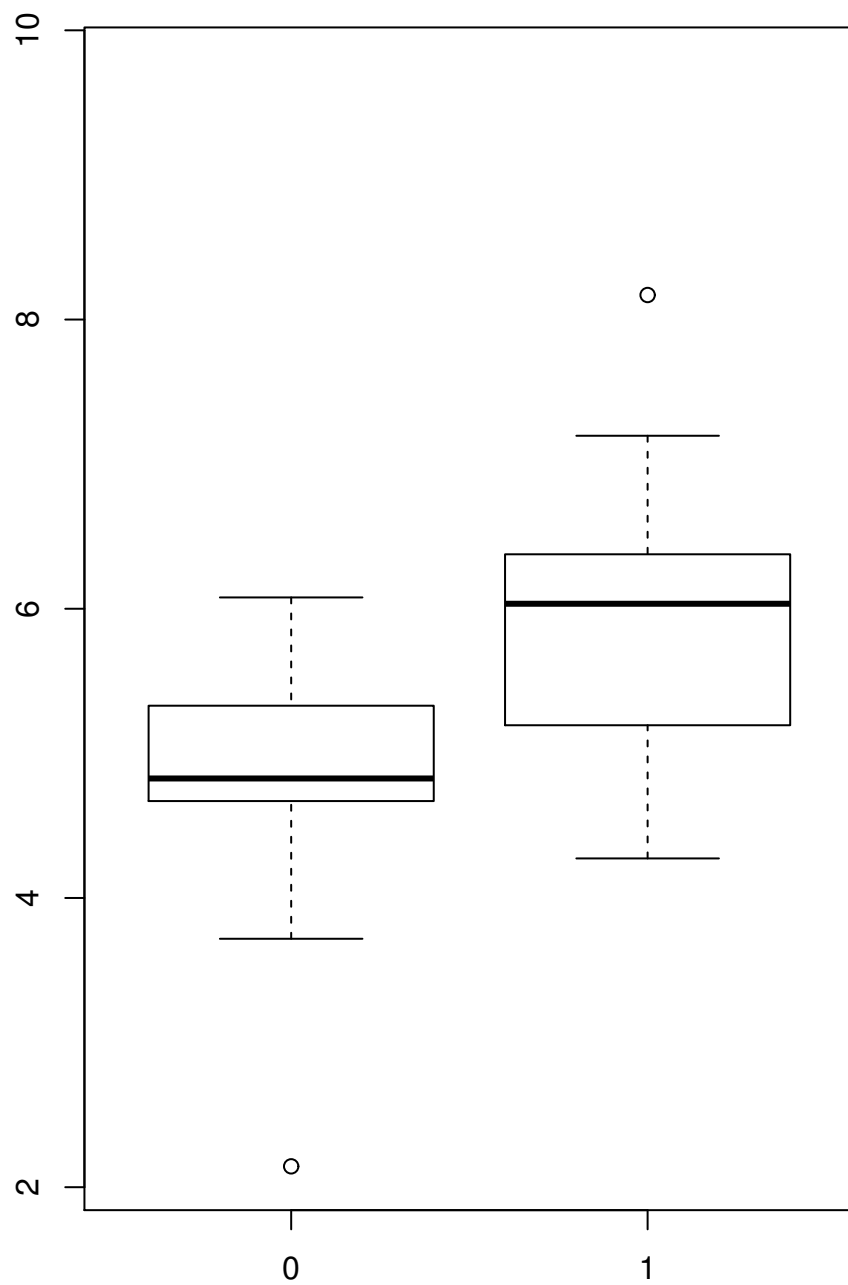

hsa-miR-671-5p  
(GSE67139)

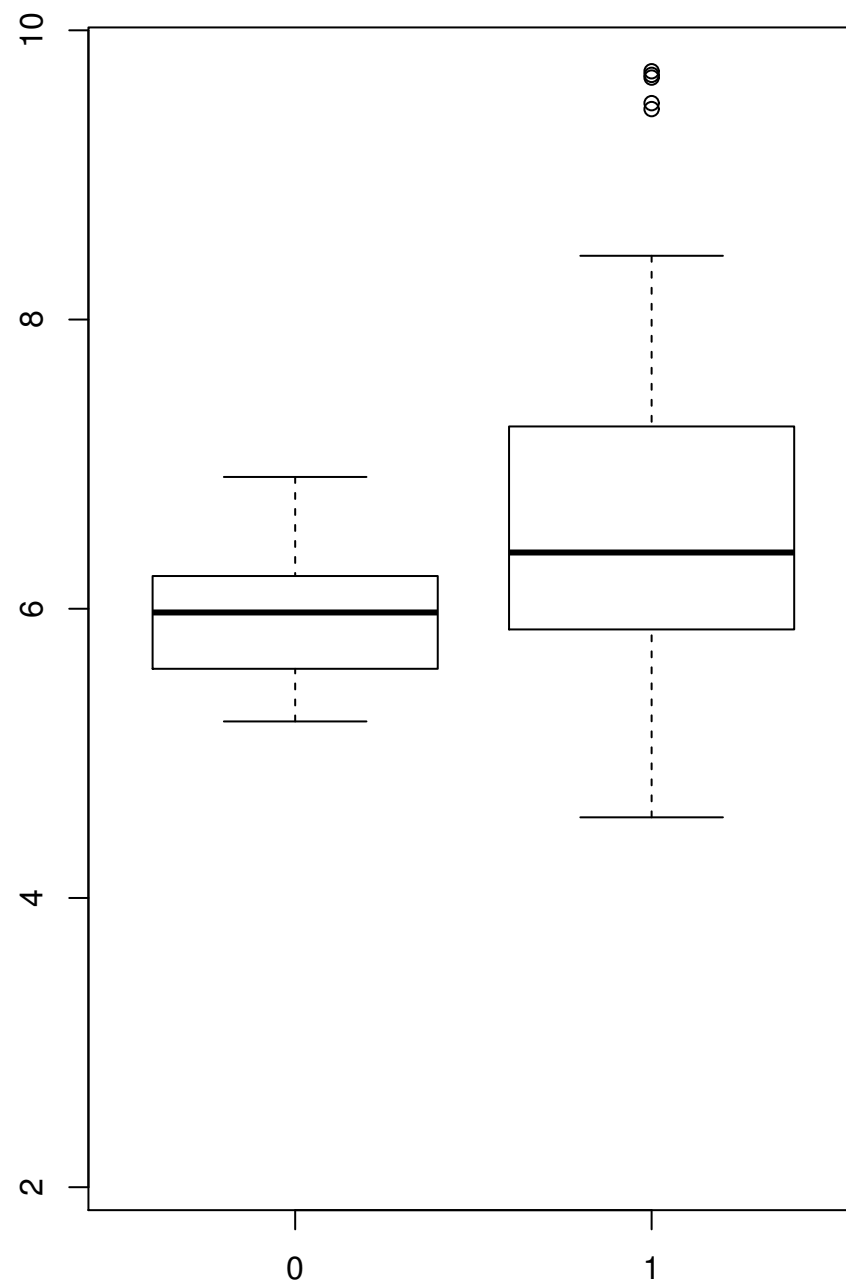

**hsa-miR-936  
(GSE67138)**

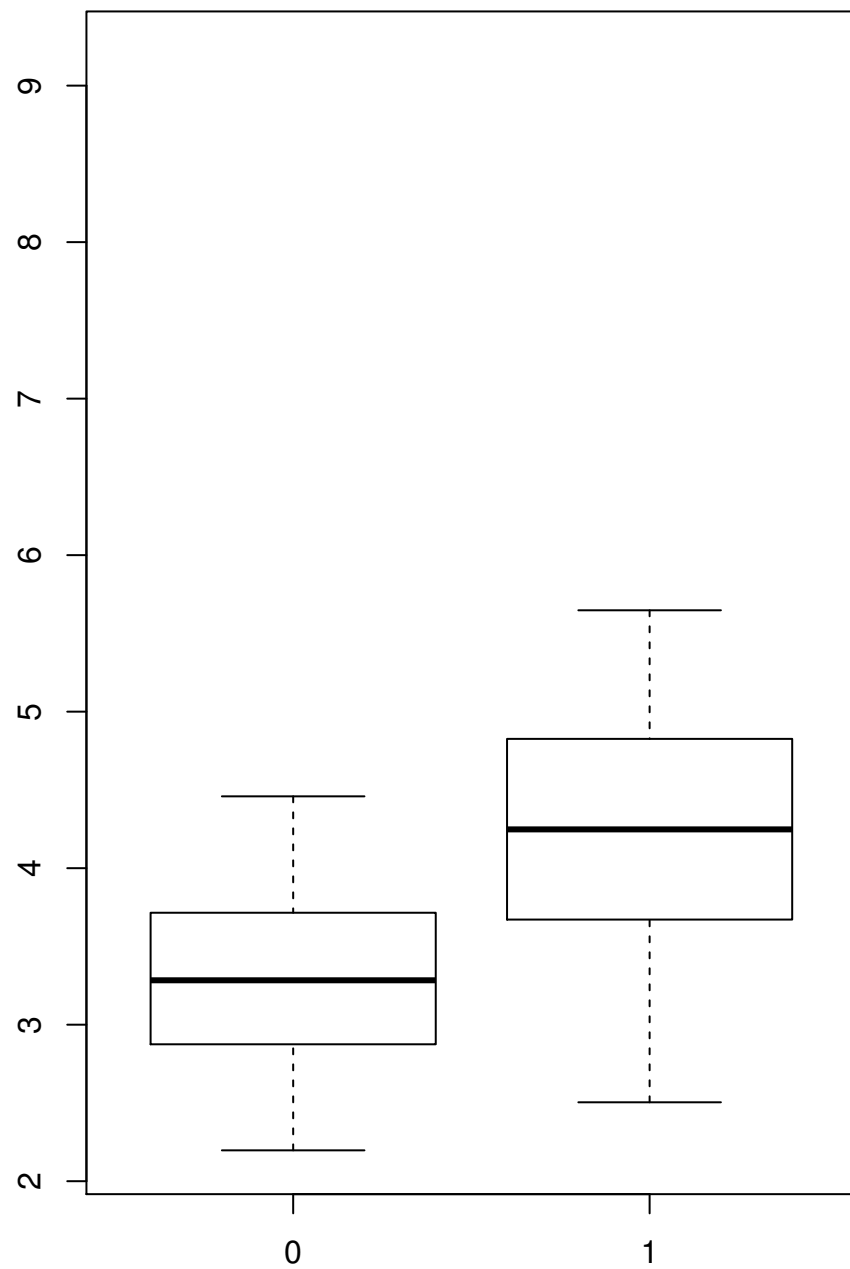

**hsa-miR-936  
(GSE67139)**

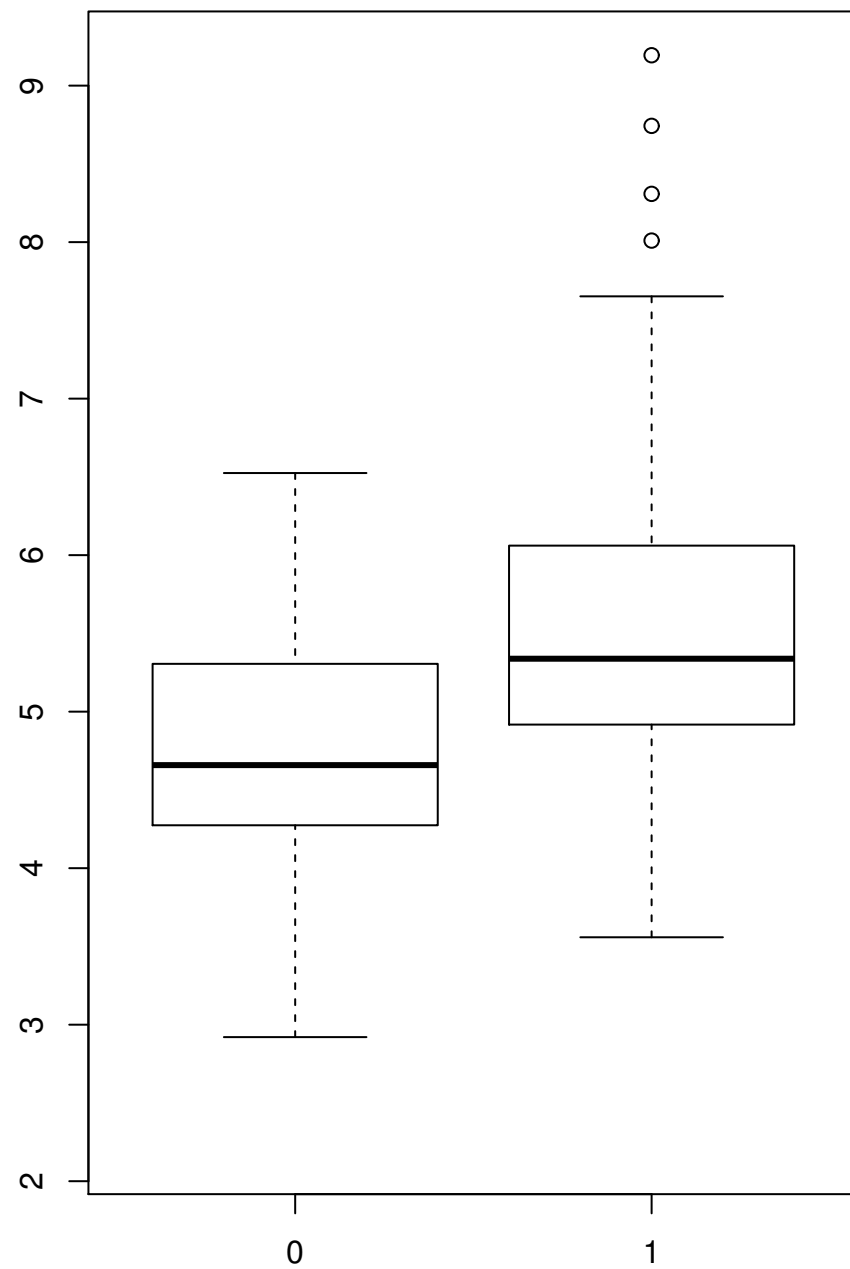

**hsa-miR-939**  
**(GSE67138)**

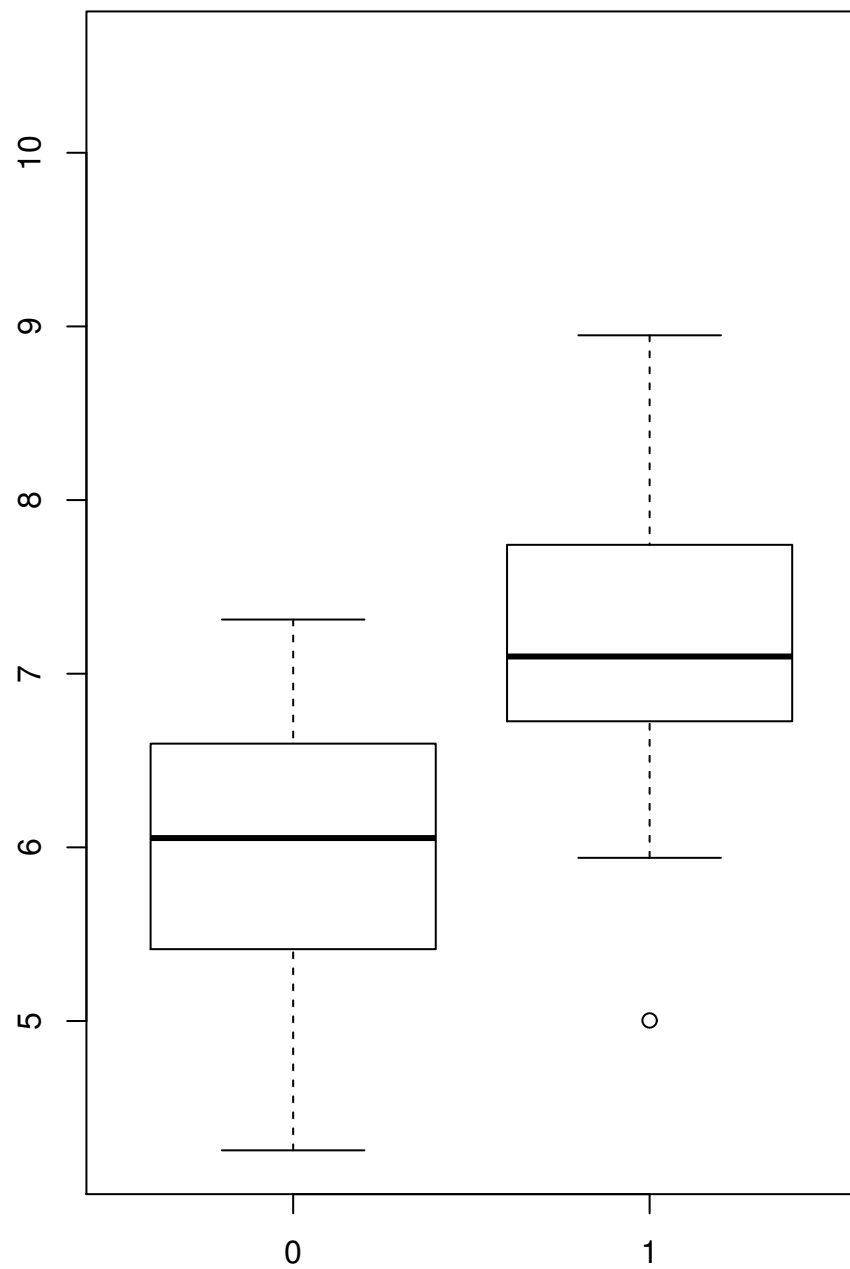

**hsa-miR-939**  
**(GSE67139)**

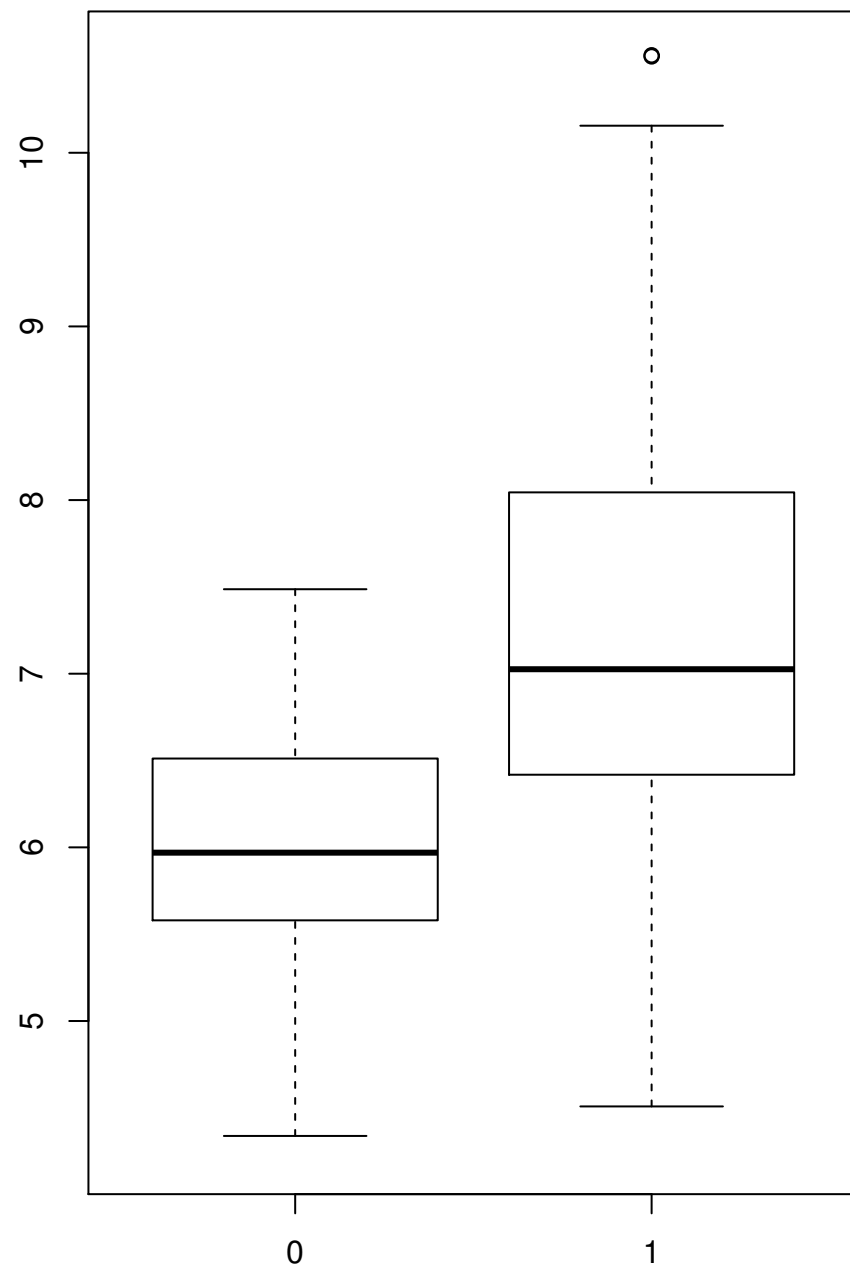

**hsa-miR-99a  
(GSE67138)**

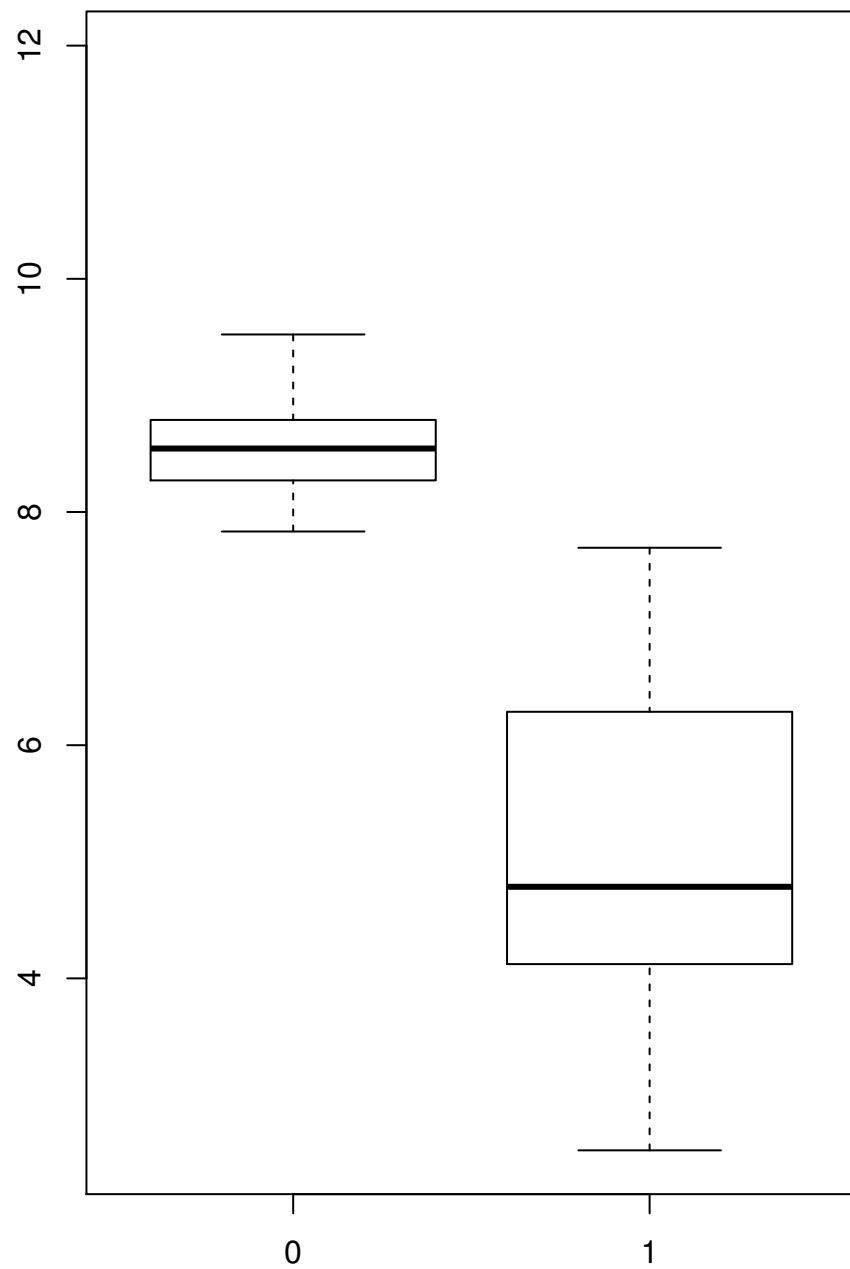

**hsa-miR-99a  
(GSE67139)**

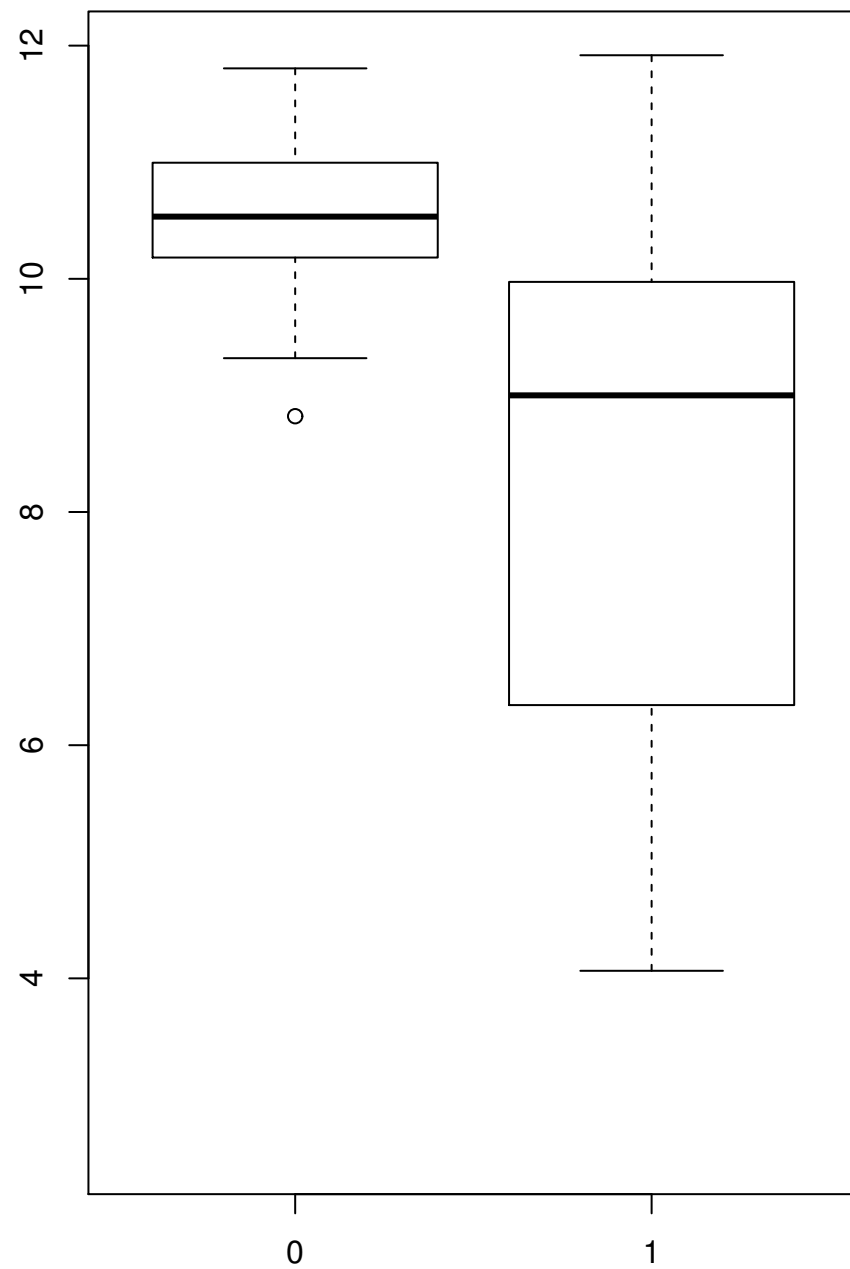

Supplement: f1 [file 6591634.f1.zip]
