# Supplementary material for: Detecting Differentially Variable MicroRNAs via Model-Based Clustering
Source: Hindawi journal article supplement (doi:10.1155/2018/6591634), 2018-07-12

**Histogram for GSE67138**

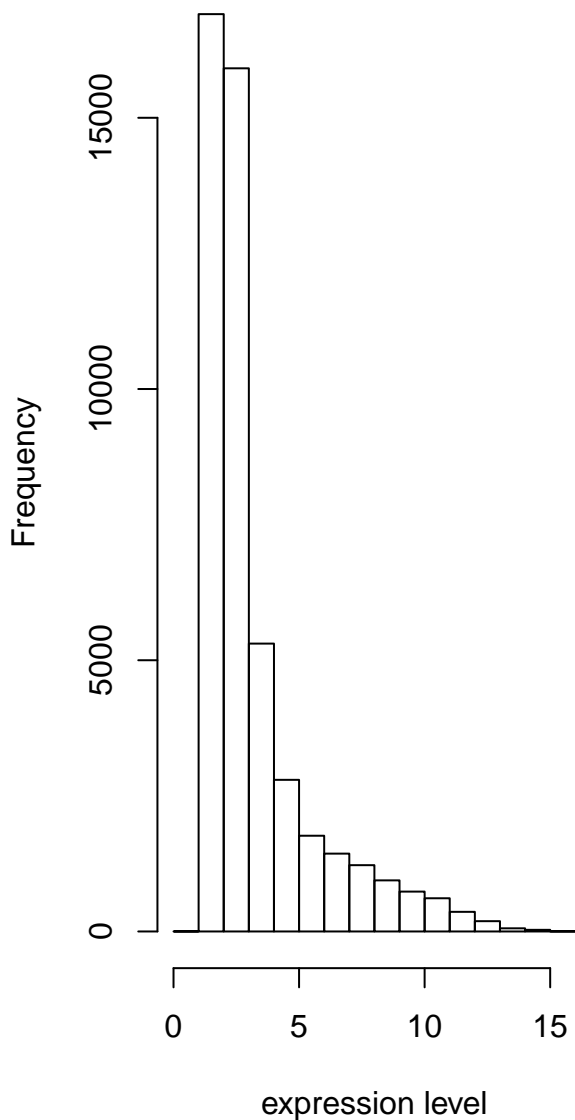

**QQ plot for original GSE67138**

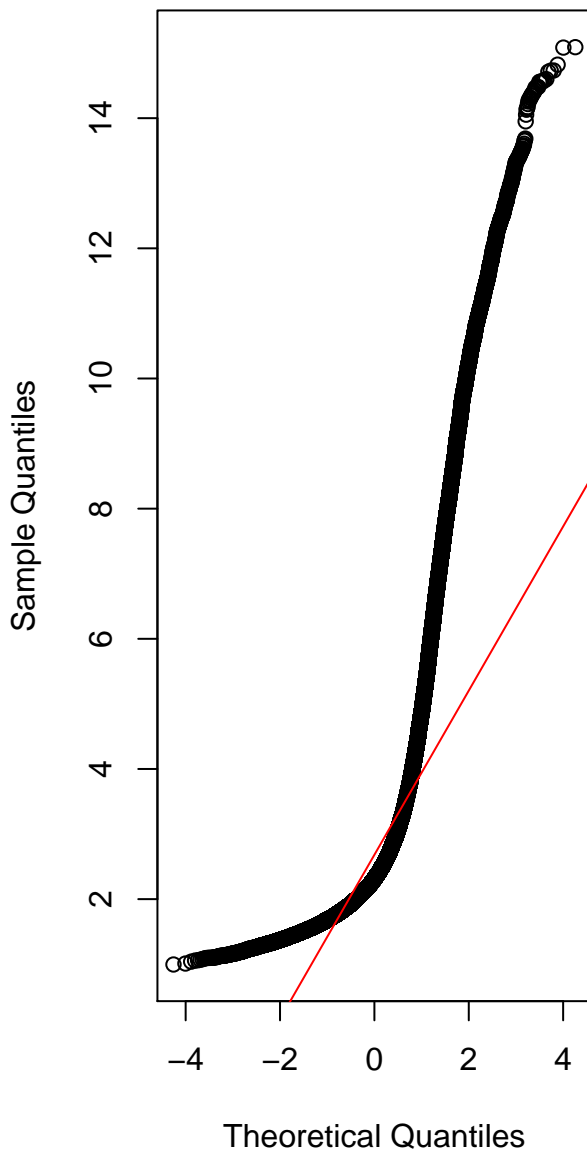

ogram for GSE67138 (transformed and scaled expression level for Box-Cox transformed and scaled

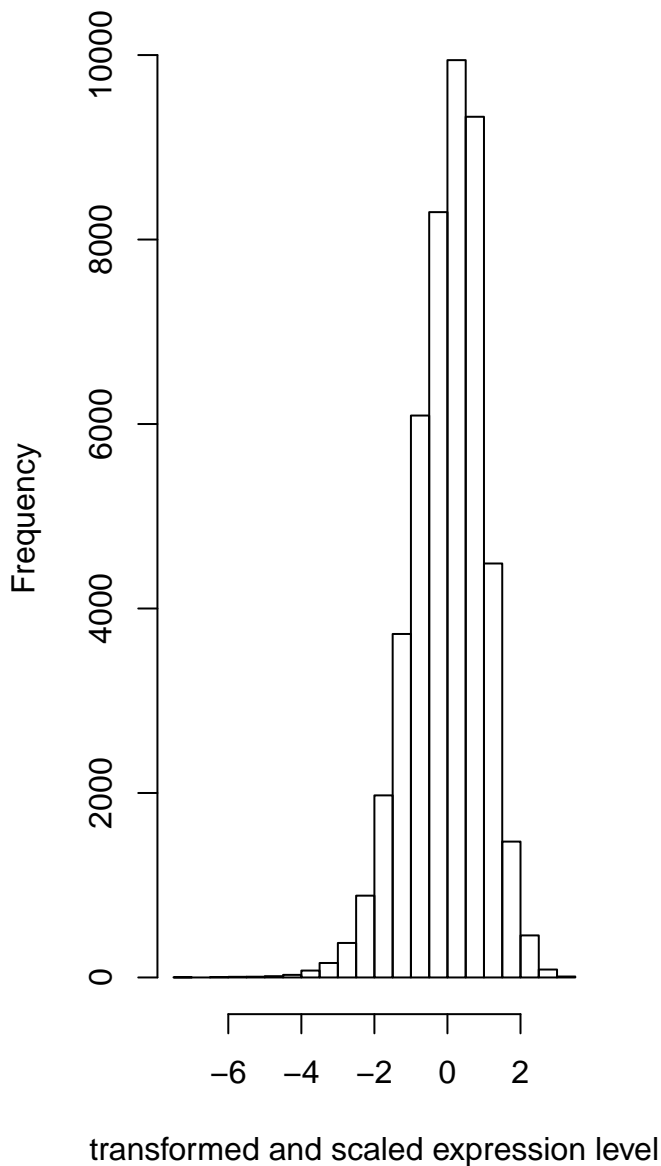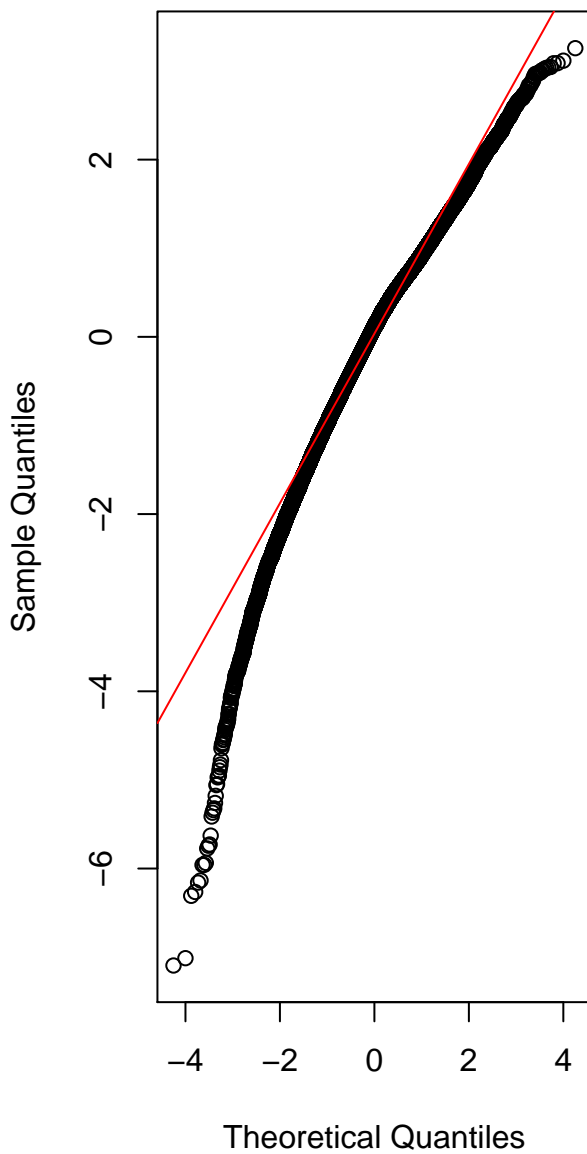

**Histogram for GSE67139**

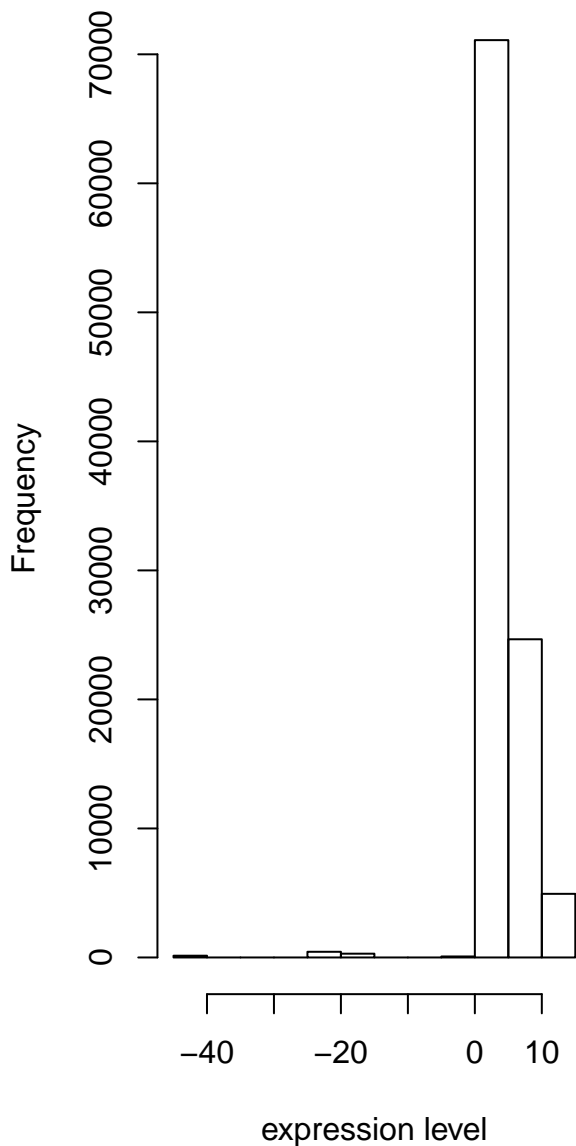

**QQ plot for original GSE67138**

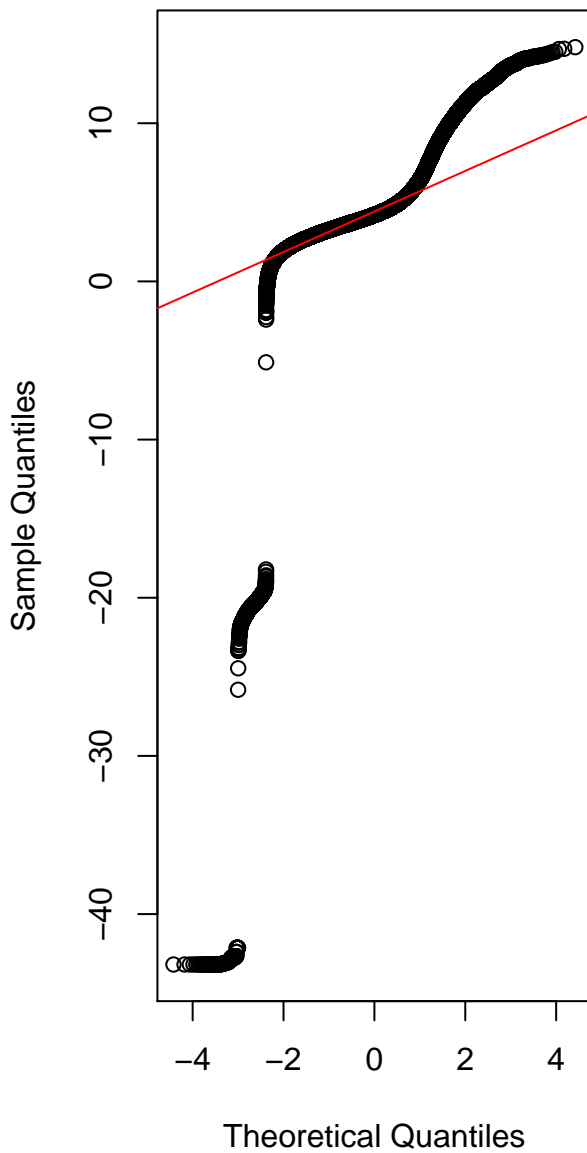

ogram for GSE67139 (transformed and scaled for Box-Cox transformed and scaled

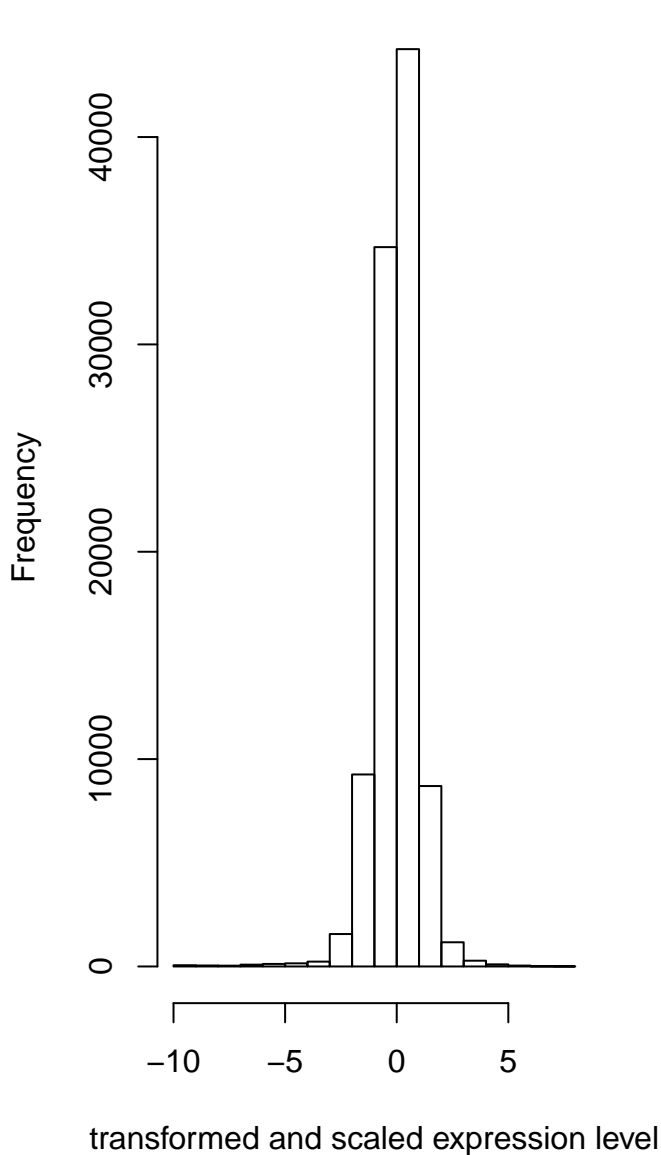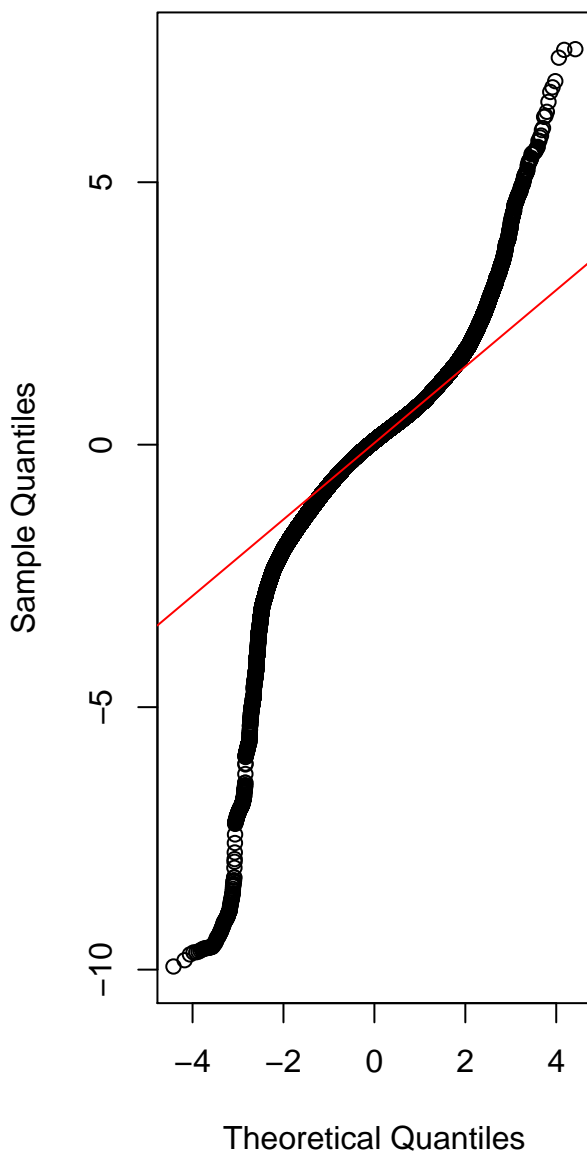

Supplement: f1 [file 6591634.f1.zip]
