# Supplementary material for: Detecting Differentially Variable MicroRNAs via Model-Based Clustering
Source: Hindawi journal article supplement (doi:10.1155/2018/6591634), 2018-07-12

**Histogram (SimI)**

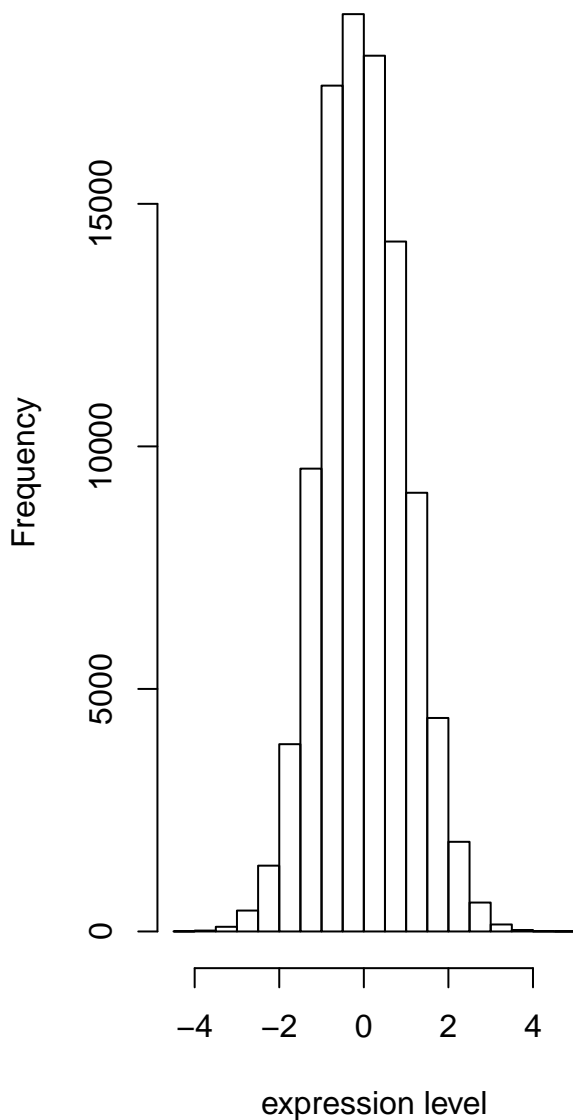

**QQ plot (SimI)**

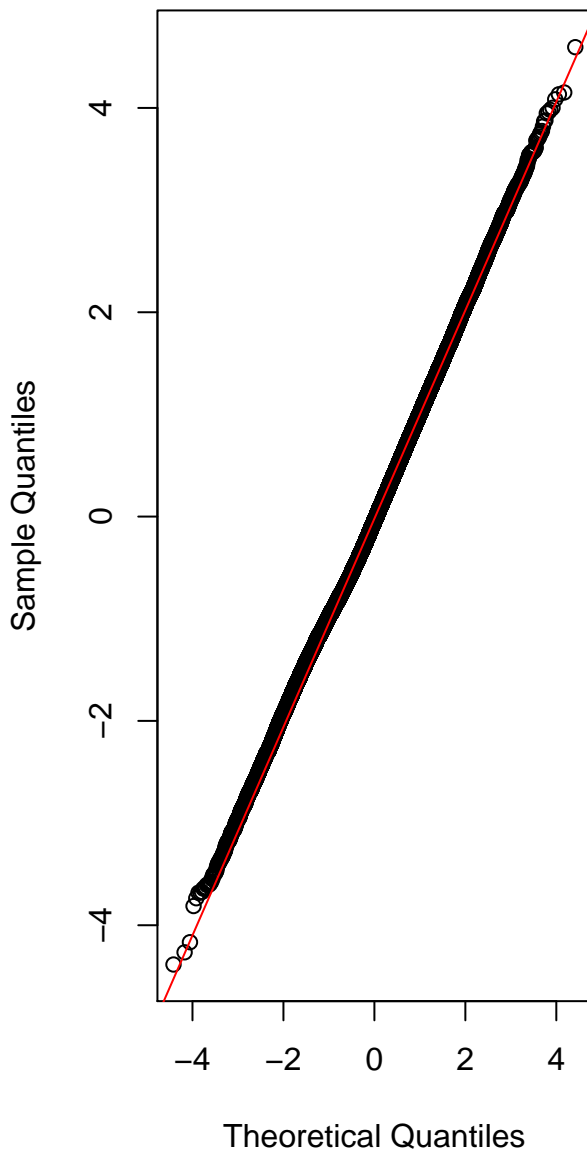

**Histogram (SimII)**

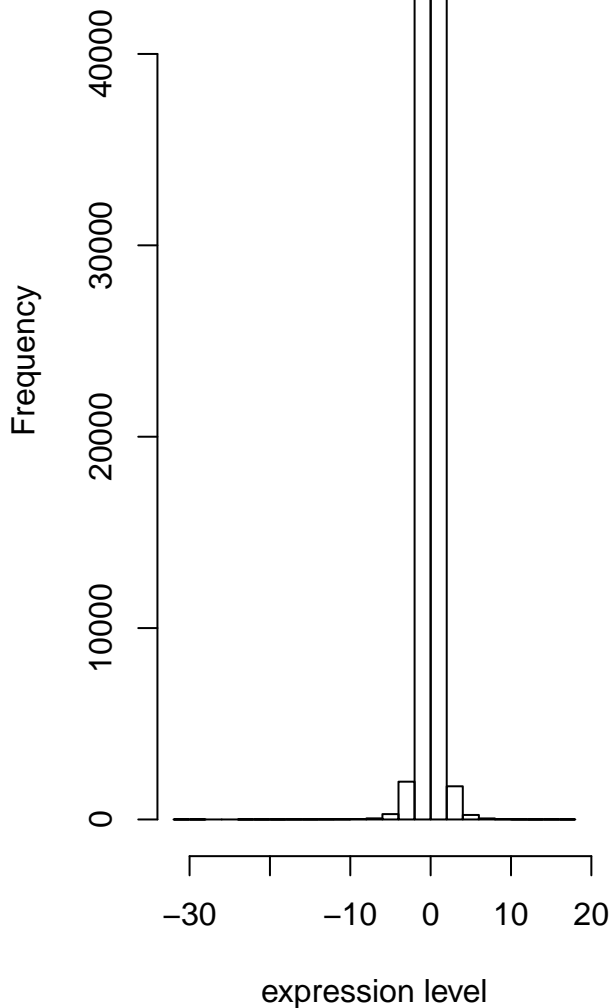

**QQ plot (SimII)**

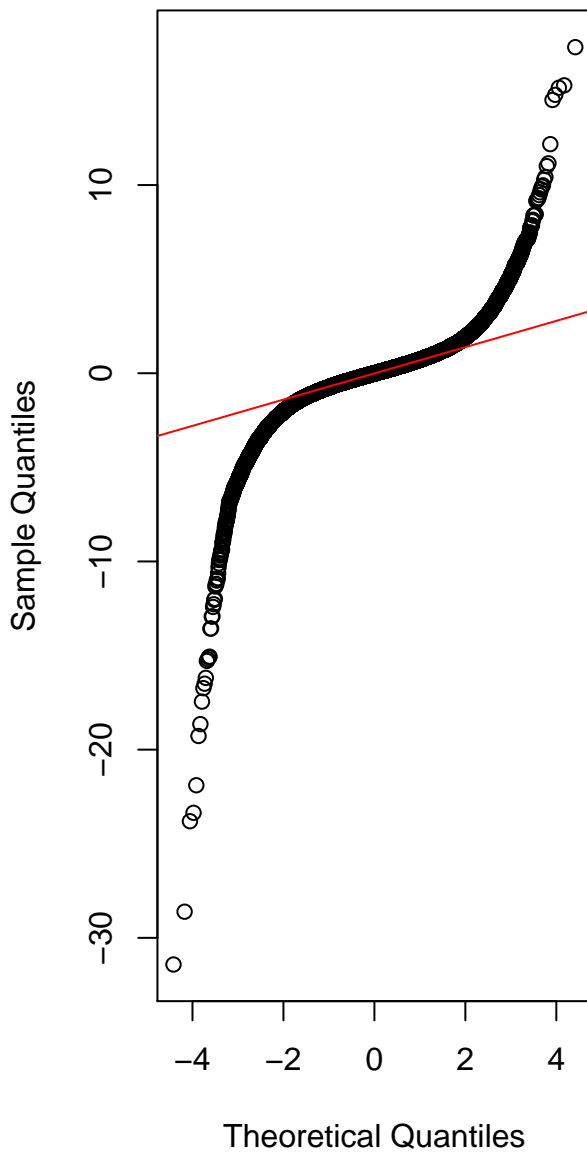

**Histogram (SimIII)**

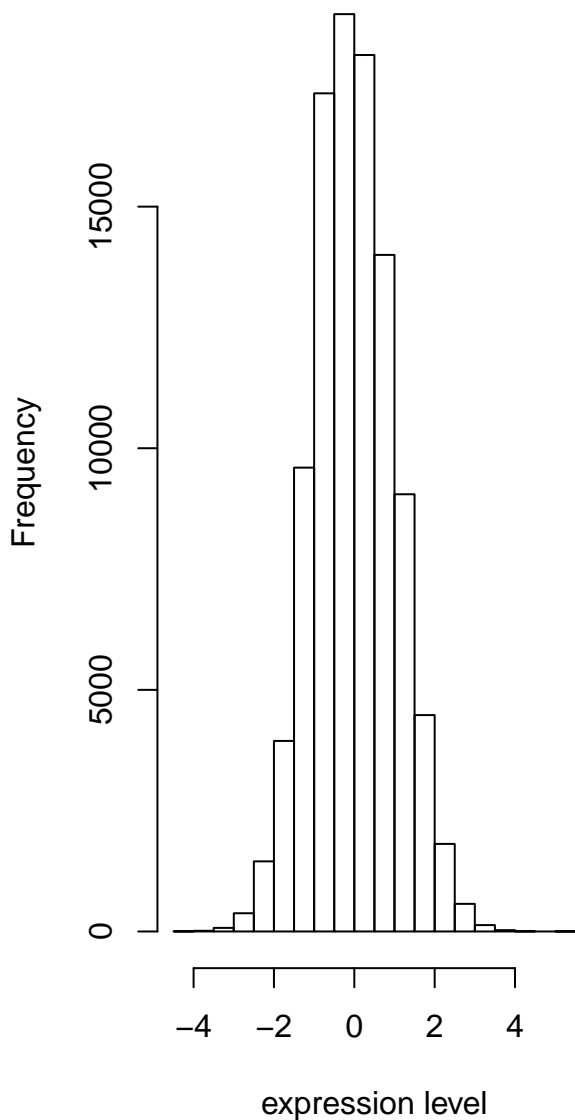

**QQ plot (SimIII)**

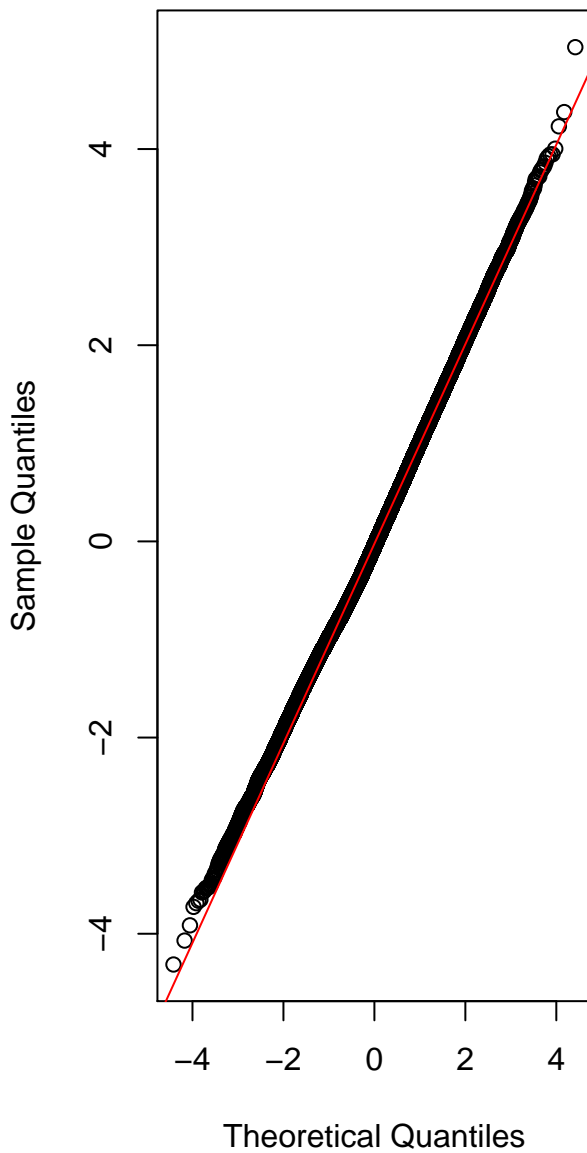

**Histogram (SimIV)**

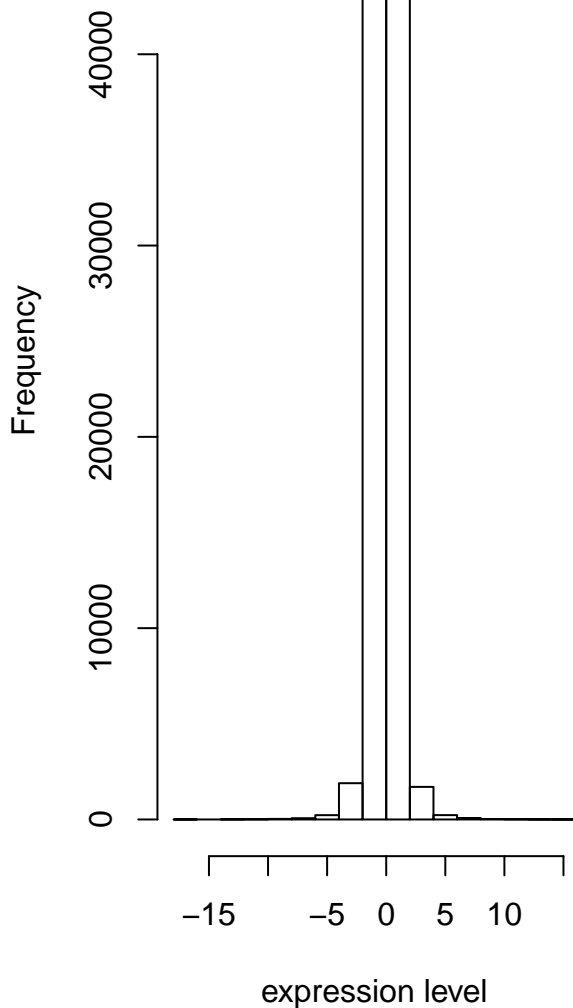

**QQ plot (SimIV)**

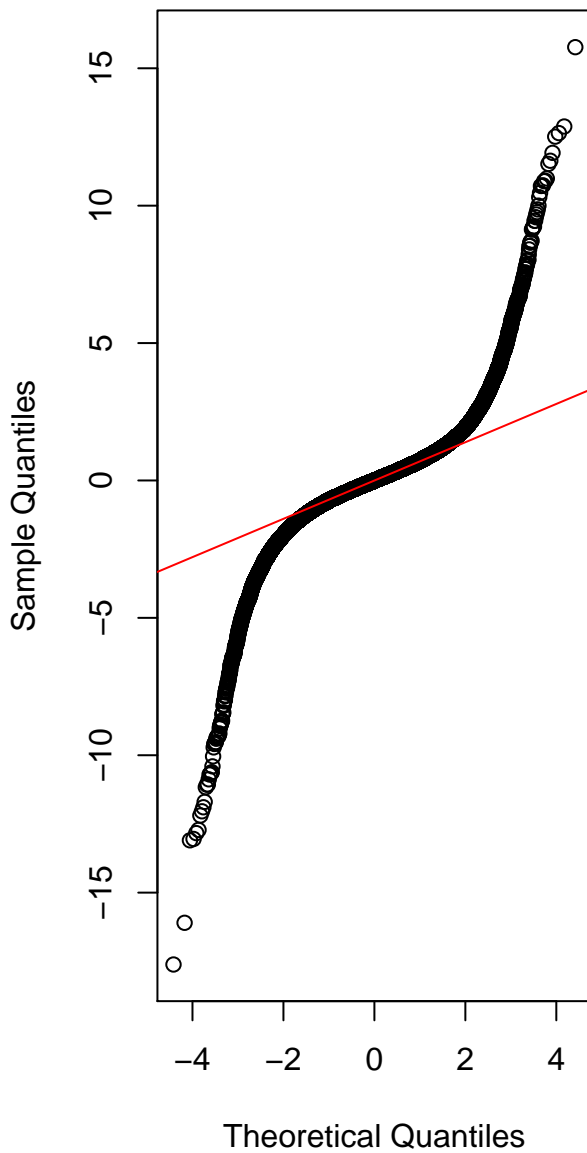

Supplement: f1 [file 6591634.f1.zip]
