# Supplementary material for: Detecting Differentially Variable MicroRNAs via Model-Based Clustering
Source: Hindawi journal article supplement (doi:10.1155/2018/6591634), 2018-07-12
Supplement: f1 [file 6591634.f1.zip]

# Supplementary Documents

---

## Contents

|          |                                                                                                             |            |
|----------|-------------------------------------------------------------------------------------------------------------|------------|
| <b>A</b> | <b>The gs model</b>                                                                                         | <b>ii</b>  |
| <b>B</b> | <b>Re-parameterization of the correlation</b>                                                               | <b>iv</b>  |
| <b>C</b> | <b>log density for genes in cluster 1</b>                                                                   | <b>iv</b>  |
| <b>D</b> | <b>log density for genes in cluster 2</b>                                                                   | <b>v</b>   |
| <b>E</b> | <b>log density for genes in cluster 3</b>                                                                   | <b>v</b>   |
| <b>F</b> | <b>Parameter Estimation by EM Algorithm</b>                                                                 | <b>v</b>   |
| <b>G</b> | <b>E-step of the EM algorithm</b>                                                                           | <b>vii</b> |
| <b>H</b> | <b>The M-step of the E-M algorithm for 3-mixture distribution</b>                                           | <b>ix</b>  |
| H.1      | The first derivative of $\partial \log [f_1(\mathbf{x}_i   \boldsymbol{\theta}_1)] / \partial s_{c_1}$      | x          |
| H.2      | The first derivative of $\partial \log [f_1(\mathbf{x}_i   \boldsymbol{\theta}_1)] / \partial \Delta_{n_1}$ | x          |
| H.3      | The first derivative of $\partial \log [f_1(\mathbf{x}_i   \boldsymbol{\theta}_1)] / \partial r_{c_1}$      | xi         |
| H.4      | The first derivative of $\partial \log [f_1(\mathbf{x}_i   \boldsymbol{\theta}_1)] / \partial r_{n_1}$      | xi         |
| H.5      | The first derivative of $\partial \log [f_1(\mathbf{x}_i   \boldsymbol{\theta}_1)] / \partial \mu_{c_1}$    | xii        |
| H.6      | The first derivative of $\partial \log [f_1(\mathbf{x}_i   \boldsymbol{\theta}_1)] / \partial \mu_{n_1}$    | xii        |
| H.7      | The first derivative of $\partial \log [f_2(\mathbf{x}_i   \boldsymbol{\theta}_2)] / \partial s_2$          | xii        |
| H.8      | The first derivative of $\partial \log [f_2(\mathbf{x}_i   \boldsymbol{\theta}_2)] / \partial r_{c_2}$      | xii        |
| H.9      | The first derivative of $\partial \log [f_2(\mathbf{x}_i   \boldsymbol{\theta}_2)] / \partial r_{n_2}$      | xiii       |
| H.10     | The first derivative of $\partial \log [f_2(\mathbf{x}_i   \boldsymbol{\theta}_2)] / \partial \mu_{c_2}$    | xiii       |
| H.11     | The first derivative of $\partial \log [f_2(\mathbf{x}_i   \boldsymbol{\theta}_2)] / \partial \mu_{n_2}$    | xiii       |
| H.12     | The first derivative of $\partial \log [f_3(\mathbf{x}_i   \boldsymbol{\theta}_3)] / \partial s_{c_3}$      | xiv        |
| H.13     | The first derivative of $\partial \log [f_3(\mathbf{x}_i   \boldsymbol{\theta}_3)] / \partial \Delta_{n_3}$ | xiv        |
| H.14     | The first derivative of $\partial \log [f_3(\mathbf{x}_i   \boldsymbol{\theta}_3)] / \partial r_{c_3}$      | xv         |
| H.15     | The first derivative of $\partial \log [f_3(\mathbf{x}_i   \boldsymbol{\theta}_3)] / \partial r_{n_3}$      | xv         |
| H.16     | The first derivative of $\partial \log [f_3(\mathbf{x}_i   \boldsymbol{\theta}_3)] / \partial \mu_{c_3}$    | xv         |
| H.17     | The first derivative of $\partial \log [f_3(\mathbf{x}_i   \boldsymbol{\theta}_3)] / \partial \mu_{n_3}$    | xv         |
| H.18     | The first derivatives of $Q_\ell$                                                                           | xvi        |
| H.19     | The first derivative of $\partial Q_1 / \partial s_{c_1}$                                                   | xvi        |

|      |                                                              |       |
|------|--------------------------------------------------------------|-------|
| H.20 | The first derivative of $\partial Q_1/\partial \Delta_{n_1}$ | xvi   |
| H.21 | The first derivative of $\partial Q_1/\partial r_{c_1}$      | xvi   |
| H.22 | The first derivative of $\partial Q_1/\partial r_{n_1}$      | xvii  |
| H.23 | The first derivative of $\partial Q_1/\partial \mu_{c_1}$    | xvii  |
| H.24 | The first derivative of $\partial Q_1/\partial \mu_{n_1}$    | xvii  |
| H.25 | The first derivative of $\partial Q_2/\partial s_2$          | xvii  |
| H.26 | The first derivative of $\partial Q_2/\partial r_{c_2}$      | xviii |
| H.27 | The first derivative of $\partial Q_2/\partial r_{n_2}$      | xviii |
| H.28 | The first derivative of $\partial Q_2/\partial \mu_{c_2}$    | xviii |
| H.29 | The first derivative of $\partial Q_2/\partial \mu_{n_2}$    | xviii |
| H.30 | The first derivative of $\partial Q_3/\partial s_{c_3}$      | xix   |
| H.31 | The first derivative of $\partial Q_3/\partial \Delta_{n_3}$ | xix   |
| H.32 | The first derivative of $\partial Q_3/\partial r_{c_3}$      | xix   |
| H.33 | The first derivative of $\partial Q_3/\partial r_{n_3}$      | xix   |
| H.34 | The first derivative of $\partial Q_3/\partial \mu_{c_3}$    | xx    |
| H.35 | The first derivative of $\partial Q_3/\partial \mu_{n_3}$    | xx    |

## I Log-density function for the multivariate normal distribution with special mean vector and covariance matrix xx

---

### A The gs model

We can first consider a 3-cluster partition of gene probes via our marginal mixture distribution model:

- gene probes for cases have larger dispersion than those for controls
- gene probes for cases have the same dispersion as those for controls
- gene probes for cases have smaller dispersion than those for controls

Let  $\mathbf{X} = (X_1, X_2, \dots, X_{m_c}, X_{m_c+1}, X_{m_c+2}, \dots, X_{m_c+m_n})^T$ , a  $m \times 1$  vector, be the *transformed* gene profile for a randomly selected gene over  $m$  tissue samples ( $m = m_c + m_n$ , where  $m_c$  is the number of abnormal tissue samples and  $m_n$  normal tissue samples). We assume that data have been normalized to remove the effects of confounding factors, such as dye effect, chip effect, batch effect, etc.. The distribution of  $\mathbf{X}$  is assumed a three-component mixture of multivariate Normal distributions with marginal density:

$$f(\mathbf{x}|\boldsymbol{\theta}_1, \boldsymbol{\theta}_2, \boldsymbol{\theta}_3) = \pi_1 f_1(\mathbf{x}|\boldsymbol{\theta}_1) + \pi_2 f_2(\mathbf{x}|\boldsymbol{\theta}_2) + \pi_3 f_3(\mathbf{x}|\boldsymbol{\theta}_3), \quad (\text{A1})$$

$$\pi_1 + \pi_2 + \pi_3 = 1, \pi_i > 0, i = 1, 2, 3,$$

where  $\pi_1, \pi_2, \pi_3$  are mixture proportions. The  $m \times 1$  vector  $\mathbf{x}$  is a realization of the random vector  $\mathbf{X}$ ;  $\boldsymbol{\theta}_k$ , is the parameter set for the  $k$ -th component distribution  $f_k$ ,  $k = 1, 2, 3$ ; and  $f_1, f_2$ , and  $f_3$  are the density functions for multivariate Normal distributions with the mean vectors

$$\boldsymbol{\mu}_1 = \begin{pmatrix} \mu_{c1} \mathbf{1}_{m_c} \\ \mu_{n1} \mathbf{1}_{m_n} \end{pmatrix}, \quad \boldsymbol{\mu}_2 = \begin{pmatrix} \mu_{c2} \mathbf{1}_{m_c} \\ \mu_{n2} \mathbf{1}_{m_n} \end{pmatrix}, \quad \boldsymbol{\mu}_3 = \begin{pmatrix} \mu_{c3} \mathbf{1}_{m_c} \\ \mu_{n3} \mathbf{1}_{m_n} \end{pmatrix}. \quad (\text{A2})$$

and covariance matrices

$$\begin{aligned} \Sigma_1 &= \begin{pmatrix} \sigma_{c1}^2 \mathbf{R}_{c1} & \mathbf{0} \\ \mathbf{0} & \sigma_{n1}^2 \mathbf{R}_{n1} \end{pmatrix}, \quad \Sigma_2 = \begin{pmatrix} \sigma_2^2 \mathbf{R}_{c1} & \mathbf{0} \\ \mathbf{0} & \sigma_2^2 \mathbf{R}_{n1} \end{pmatrix}, \\ \Sigma_3 &= \begin{pmatrix} \sigma_{c3}^2 \mathbf{R}_{c3} & \mathbf{0} \\ \mathbf{0} & \sigma_{n3}^2 \mathbf{R}_{n3} \end{pmatrix}, \end{aligned} \quad (\text{A3})$$

respectively, where correlation matrix

$$\mathbf{R}_t = (1 - \rho_t) \left[ \mathbf{I}_{n_t} + \frac{\rho_t}{(1 - \rho_t)} \mathbf{1}_{n_t} \mathbf{1}_{n_t}^T \right], \quad (\text{A4})$$

$t = c_1, n_1, 2, c_3$ , or  $n_3$ .  $n_t = m_c$  if  $t = c_1$  or  $c_3$ ;  $n_t = m$  if  $t = 2$ ;  $n_t = m_n$  if  $t = n_1$ , or  $n_3$ . Here we assume, without loss of generality, the first  $m_c$  elements of the random vector  $\mathbf{X}$  are for the abnormal tissue samples and the remaining  $m_n$  elements are for the normal tissue samples. Let  $\boldsymbol{\theta}_1 = (\mu_{c1}, \sigma_{c1}^2, \rho_{c1}, \mu_{n1}, \sigma_{n1}^2, \rho_{n1})^T$ ,  $\boldsymbol{\theta}_2 = (\mu_{c2}, \mu_{n2}, \sigma_2^2, \rho_{c2}, \rho_{n2})^T$ ,  $\boldsymbol{\theta}_3 = (\mu_{c3}, \sigma_{c3}^2, \rho_{c3}, \mu_{n3}, \sigma_{n3}^2, \rho_{n3})^T$ .

Note that  $\sigma_{c1}^2 > \sigma_{n1}^2$  for component 1 in which genes are over-dispersed in abnormal tissue samples, and  $\sigma_{c3}^2 < \sigma_{n3}^2$  for component 3 where genes are under-dispersed in abnormal samples. Our prior belief is that the majority of genes are usually non-differentially dispersed, so we assume  $\pi_2 > \pi_1$  and  $\pi_2 > \pi_3$ .

We reparametrize variances as

$$s_k = \log(\sigma_k^2), \quad k = c_1, 2, c_3, n_1, n_3. \quad (\text{A5})$$

We reparametrize variances again to make sure  $\sigma_{c1}^2 > \sigma_{n1}^2$  and  $\sigma_{c3}^2 < \sigma_{n3}^2$ :

$$\begin{aligned} s_{n1} &= s_{c1} - \exp(\Delta_{n1}) \\ s_{n3} &= s_{c3} + \exp(\Delta_{n3}) \end{aligned} \quad (\text{A6})$$

## B Re-parameterization of the correlation

To make sure the covariance matrix is positive definite, the correlation  $\rho$  should satisfies the condition

$$-\frac{1}{n-1} < \rho < 1.$$

So we reparameterize the correlation parameter

$$\rho = \frac{\exp(r) - 1/(n-1)}{1 + \exp(r)}$$

## C log density for genes in cluster 1

$$\begin{aligned} \log[f_1(\mathbf{x})|\boldsymbol{\theta}_1] = & -\frac{n_c}{2} \log(2\pi) - \frac{n_c}{2} s_{c1} - \frac{n_c}{2} \log(n_c) + \frac{n_c-1}{2} \log(n_c-1) + \frac{n_c}{2} \log[1 + \exp(r_{c1})] - \frac{r_{c1}}{2} \\ & - \frac{[\mathbf{a}(\mathbf{x}_{c1}, \mu_{c1})]^T [\mathbf{a}(\mathbf{x}_{c1}, \mu_{c1})]}{2 \exp(s_{c1})} \frac{n_c-1}{n_c} [1 + \exp(r_{c1})] \\ & + \frac{([\mathbf{a}(\mathbf{x}_{c1}, \mu_{c1})]^T \mathbf{1})^2 \left[ (n_c-2) + \exp(r_{c1})(n_c-1) - \frac{1}{\exp(r_{c1})} \right]}{2 \exp(s_{c1}) n_c^2} \\ & - \frac{n_n}{2} \log(2\pi) - \frac{n_n}{2} [s_{c1} - \exp(\Delta_{n1})] - \frac{n_n}{2} \log(n_n) + \frac{n_n-1}{2} \log(n_n-1) + \frac{n_n}{2} \log[1 + \exp(r_{n1})] - \frac{r_{n1}}{2} \\ & - \frac{[\mathbf{a}(\mathbf{x}_{n1}, \mu_{n1})]^T [\mathbf{a}(\mathbf{x}_{n1}, \mu_{n1})]}{2 \exp([s_{c1} - \exp(\Delta_{n1})])} \frac{n_n-1}{n_n} [1 + \exp(r_{n1})] \\ & + \frac{([\mathbf{a}(\mathbf{x}_{n1}, \mu_{n1})]^T \mathbf{1})^2 \left[ (n_n-2) + \exp(r_{n1})(n_n-1) - \frac{1}{\exp(r_{n1})} \right]}{2 \exp([s_{c1} - \exp(\Delta_{n1})]) n_n^2} \end{aligned} \quad (\text{A7})$$

where

$$\begin{aligned} \mathbf{a}(\mathbf{x}, \mu)^T \mathbf{a}(\mathbf{x}, \mu) &= \mathbf{x}^T \mathbf{x} - 2\mu \mathbf{1}^T \mathbf{x} + n\mu^2 \\ (\mathbf{a}(\mathbf{x}, \mu)^T \mathbf{1})^2 &= (\mathbf{1}^T \mathbf{x})^2 + n^2 \mu^2 - 2n\mu \mathbf{x}^T \mathbf{1}. \end{aligned}$$

## D log density for genes in cluster 2

$$\begin{aligned}
\log [f_2(\mathbf{x})|\boldsymbol{\theta}_2] = & -\frac{n_c}{2} \log(2\pi) - \frac{n_c}{2} s_2 - \frac{n_c}{2} \log(n_c) + \frac{n_c-1}{2} \log(n_c-1) + \frac{n_c}{2} \log[1 + \exp(r_{c_2})] - \frac{r_{c_2}}{2} \\
& - \frac{[\mathbf{a}(\mathbf{x}_{c_1}, \mu_{c_2})]^T [\mathbf{a}(\mathbf{x}_{c_1}, \mu_{c_2})]}{2 \exp(s_2)} \frac{n_c-1}{n_c} [1 + \exp(r_{c_2})] \\
& + \frac{\left([\mathbf{a}(\mathbf{x}_{c_1}, \mu_{c_2})]^T \mathbf{1}\right)^2 \left[(n_c-2) + \exp(r_{c_2})(n_c-1) - \frac{1}{\exp(r_{c_2})}\right]}{2 \exp(s_2) n_c^2} \\
& - \frac{n_n}{2} \log(2\pi) - \frac{n_n}{2} [s_2] - \frac{n_n}{2} \log(n_n) + \frac{n_n-1}{2} \log(n_n-1) + \frac{n_n}{2} \log[1 + \exp(r_{n_2})] - \frac{r_{n_2}}{2} \\
& - \frac{[\mathbf{a}(\mathbf{x}_{n_1}, \mu_{n_2})]^T [\mathbf{a}(\mathbf{x}_{n_1}, \mu_{n_2})]}{2 \exp([s_2])} \frac{n_n-1}{n_n} [1 + \exp(r_{n_2})] \\
& + \frac{\left([\mathbf{a}(\mathbf{x}_{n_1}, \mu_{n_2})]^T \mathbf{1}\right)^2 \left[(n_n-2) + \exp(r_{n_2})(n_n-1) - \frac{1}{\exp(r_{n_2})}\right]}{2 \exp([s_2]) n_n^2}
\end{aligned} \tag{A8}$$

## E log density for genes in cluster 3

$$\begin{aligned}
\log [f_3(\mathbf{x})|\boldsymbol{\theta}_3] = & -\frac{n_c}{2} \log(2\pi) - \frac{n_c}{2} s_{c_3} - \frac{n_c}{2} \log(n_c) + \frac{n_c-1}{2} \log(n_c-1) + \frac{n_c}{2} \log[1 + \exp(r_{c_3})] - \frac{r_{c_3}}{2} \\
& - \frac{[\mathbf{a}(\mathbf{x}_{c_3}, \mu_{c_3})]^T [\mathbf{a}(\mathbf{x}_{c_3}, \mu_{c_3})]}{2 \exp(s_{c_3})} \frac{n_c-1}{n_c} [1 + \exp(r_{c_3})] \\
& + \frac{\left([\mathbf{a}(\mathbf{x}_{c_3}, \mu_{c_3})]^T \mathbf{1}\right)^2 \left[(n_c-2) + \exp(r_{c_3})(n_c-1) - \frac{1}{\exp(r_{c_3})}\right]}{2 \exp(s_{c_3}) n_c^2} \\
& - \frac{n_n}{2} \log(2\pi) - \frac{n_n}{2} [s_{c_3} + \exp(\Delta_{n_3})] - \frac{n_n}{2} \log(n_n) + \frac{n_n-1}{2} \log(n_n-1) + \frac{n_n}{2} \log[1 + \exp(r_{n_3})] - \frac{r_{n_3}}{2} \\
& - \frac{[\mathbf{a}(\mathbf{x}_{n_3}, \mu_{n_3})]^T [\mathbf{a}(\mathbf{x}_{n_3}, \mu_{n_3})]}{2 \exp([s_{c_3} + \exp(\Delta_{n_3})])} \frac{n_n-1}{n_n} [1 + \exp(r_{n_3})] \\
& + \frac{\left([\mathbf{a}(\mathbf{x}_{n_3}, \mu_{n_3})]^T \mathbf{1}\right)^2 \left[(n_n-2) + \exp(r_{n_3})(n_n-1) - \frac{1}{\exp(r_{n_3})}\right]}{2 \exp([s_{c_3} + \exp(\Delta_{n_3})]) n_n^2}
\end{aligned} \tag{A9}$$

## F Parameter Estimation by EM Algorithm

Based on Titterington et al. (1995, Section 4.3), the fully categorized data can be represented as

$$\{\mathbf{y}_i, i = 1, \dots, p\} = \{(\mathbf{x}_i^T, \mathbf{z}_i^T)^T : i = 1, \dots, p\},$$

where  $p$  is the number of genes,  $\mathbf{x}_i$  is a  $n \times 1$  vector,  $n = n_c + n_n$ ,  $n_c$  is the number of cases,  $n_n$  is the number of controls,  $\mathbf{z}_i = (z_{i1}, z_{i2}, 1 - z_{i1} - z_{i2})$  and

$$z_{ij} = \begin{cases} 1 & \text{if } \mathbf{x}_i \text{ is in category } j, \\ 0 & \text{otherwise.} \end{cases}, \quad i = 1, \dots, p, \quad j = 1, 2.$$

The likelihood corresponding to  $(\mathbf{y}_1, \dots, \mathbf{y}_p)$  can then be written in the form

$$\begin{aligned} g(\mathbf{y}_1, \dots, \mathbf{y}_p | \Psi) &= \prod_{i=1}^p f(\mathbf{x}_i, \mathbf{z}_i) \\ &= \prod_{i=1}^p f(\mathbf{x}_i | \mathbf{z}_i) f(\mathbf{z}_i) \\ &= \prod_{i=1}^p \left\{ [f_1(\mathbf{x}_i)^{z_{i1}} f_2(\mathbf{x}_i)^{z_{i2}} f_3(\mathbf{x}_i)^{(1-z_{i1}-z_{i2})}] [\pi_1^{z_{i1}} \pi_2^{z_{i2}} (1 - \pi_1 - \pi_2)^{(1-z_{i1}-z_{i2})}] \right\}, \end{aligned}$$

where

$$\mathbf{Z}_i \sim \text{Multinomial}(1, \pi_1, \pi_2, 1 - \pi_1 - \pi_2) \quad (\text{A10})$$

and

$$\begin{aligned} f(\mathbf{z}_i) &= \begin{cases} \pi_1 & \text{if } z_{i1} = 1 \text{ and } z_{i2} = 0, \\ \pi_2 & \text{if } z_{i2} = 1 \text{ and } z_{i1} = 0, \\ 1 - \pi_1 - \pi_2 & \text{if } z_{i1} = z_{i2} = 0, \end{cases} \\ &= \pi_1^{z_{i1}} \pi_2^{z_{i2}} (1 - \pi_1 - \pi_2)^{(1-z_{i1}-z_{i2})} \end{aligned} \quad (\text{A11})$$

and

$$\begin{aligned} f(\mathbf{x}_i | \mathbf{z}_i) &= \begin{cases} f_1(\mathbf{x}_i) & \text{if } z_{i1} = 1 \text{ and } z_{i2} = 0, \\ f_2(\mathbf{x}_i) & \text{if } z_{i2} = 1 \text{ and } z_{i1} = 0, \\ f_3(\mathbf{x}_i) & \text{if } z_{i1} = z_{i2} = 0, \end{cases} \\ &= f_1(\mathbf{x}_i)^{z_{i1}} f_2(\mathbf{x}_i)^{z_{i2}} f_3(\mathbf{x}_i)^{(1-z_{i1}-z_{i2})} \end{aligned} \quad (\text{A12})$$

The log complete likelihood function is

$$\ell_0(\Psi) = \sum_{i=1}^p \mathbf{z}_i^T \mathbf{V}(\boldsymbol{\pi}) + \sum_{i=1}^p \mathbf{z}_i^T \mathbf{U}_i(\boldsymbol{\theta}),$$

where

$$\mathbf{z}_i = \begin{pmatrix} z_{i1} \\ z_{i2} \\ 1 - z_{i1} - z_{i2} \end{pmatrix}, \quad \mathbf{V}(\boldsymbol{\pi}) = \begin{pmatrix} \log(\pi_1) \\ \log(\pi_2) \\ \log(1 - \pi_1 - \pi_2) \end{pmatrix}, \quad \mathbf{U}_i(\boldsymbol{\theta}) = \begin{pmatrix} \log(f_1(\mathbf{x}_i | \boldsymbol{\theta}_1)) \\ \log(f_2(\mathbf{x}_i | \boldsymbol{\theta}_2)) \\ \log(f_3(\mathbf{x}_i | \boldsymbol{\theta}_3)) \end{pmatrix}$$

and

$$\boldsymbol{\theta}_1 = \begin{pmatrix} s_{c_1} \\ r_{c_1} \\ \mu_{c_1} \\ \triangle_{c_1} \\ r_{n_1} \\ \mu_{n_1} \end{pmatrix}, \quad \boldsymbol{\theta}_2 = \begin{pmatrix} s_2 \\ r_{c_2} \\ \mu_{c_2} \\ r_{n_2} \\ \mu_{n_2} \end{pmatrix}, \quad \boldsymbol{\theta}_3 = \begin{pmatrix} s_{c_3} \\ r_{c_3} \\ \mu_{c_3} \\ \triangle_{n_3} \\ r_{n_3} \\ \mu_{n_3} \end{pmatrix},$$

and

$$\boldsymbol{\Psi} = (\pi_1, \pi_2, s_{c_1}, r_{c_1}, \mu_{c_1}, \triangle_{c_1}, r_{n_1}, \mu_{n_1}, s_2, r_{c_2}, \mu_{c_2}, r_{n_2}, \mu_{n_2}, s_{c_3}, r_{c_3}, \mu_{c_3}, \triangle_{n_3}, r_{n_3}, \mu_{n_3})^T.$$

The EM algorithm generates, from some initial approximation,  $\boldsymbol{\Psi}^{(0)}$ , a sequence  $\{\boldsymbol{\Psi}^{(m)}\}$  of estimates. Each iteration consists of the following double step:

**E step:** Evaluate  $E \left[ \log(g(\mathbf{y}|\boldsymbol{\Psi})|\mathbf{x}, \boldsymbol{\Psi}^{(m)}) \right] = Q \left( \boldsymbol{\Psi}, \boldsymbol{\Psi}^{(m)} \right)$ , say.

**M step:** Find  $\boldsymbol{\Psi} = \boldsymbol{\Psi}^{(m+1)}$  to maximize  $Q \left( \boldsymbol{\Psi}, \boldsymbol{\Psi}^{(m)} \right)$ .

To stabilize the estimates of  $\pi_\ell$ ,  $\ell = 1, 2, 3$ , we assume that the vector of mixing proportions  $(\pi_1, \pi_2, \pi_3)^T$  are Dirichlet distributed with parameters  $b_1 = b_2 = b_3 = 3$ .

## G E-step of the EM algorithm

We can obtain

$$Q \left( \boldsymbol{\Psi}, \boldsymbol{\Psi}^{(m)} \right) = \sum_{i=1}^p \left[ E \left( \mathbf{z}_i | \mathbf{x}, \boldsymbol{\Psi}^{(m)} \right) \right]^T \mathbf{V}(\boldsymbol{\pi}) + \sum_{i=1}^p \left[ E \left( \mathbf{z}_i | \mathbf{x}, \boldsymbol{\Psi}^{(m)} \right) \right]^T \mathbf{U}(\boldsymbol{\theta}).$$

Denote

$$\mathbf{w}_i \left( \boldsymbol{\Psi}^{(m)} \right) = E \left( \mathbf{z}_i | \mathbf{x}, \boldsymbol{\Psi}^{(m)} \right) = E \left( \mathbf{z}_i | \mathbf{x}_i, \boldsymbol{\Psi}^{(m)} \right).$$

The last equality is because of the independence of data points.

The  $j$ -th element of  $\mathbf{w}_i(\Psi^{(m)})$  is

$$\begin{aligned}
w_{ij}(\Psi^{(m)}) &= \mathbb{E}(z_{ij} | \mathbf{x}_i, \Psi^{(m)}) \\
&= \text{Pr}(z_{ij} = 1 | \mathbf{x}_i, \Psi^{(m)}) \\
&= \frac{\text{Pr}(\mathbf{x}_i | z_{ij} = 1, \Psi^{(m)}) \text{Pr}(z_{ij} = 1 | \Psi^{(m)})}{f(\mathbf{x}_i, \Psi^{(m)})} \\
&= \frac{f_j(\mathbf{x}_i | \boldsymbol{\theta}_j^{(m)}) \pi_j^{(m)}}{f(\mathbf{x}_i | \Psi^{(m)})},
\end{aligned}$$

where

$$f(\mathbf{x}_i | \Psi^{(m)}) = f_1(\mathbf{x}_i | \boldsymbol{\theta}_1^{(m)}) \pi_1^{(m)} + f_2(\mathbf{x}_i | \boldsymbol{\theta}_2^{(m)}) \pi_2^{(m)} + f_3(\mathbf{x}_i | \boldsymbol{\theta}_3^{(m)}) [1 - \pi_1^{(m)} - \pi_2^{(m)}].$$

These “weights” ( $w_{ij}(\Psi^{(m)})$ ,  $i = 1, \dots, p$ ,  $j = 1, 2$ ) are therefore the probabilities of category membership for the  $i$ -th observation, conditional on  $\mathbf{x}_i$  and given that the parameter is  $\Psi^{(m)}$ .

$$\begin{aligned}
Q(\Psi, \Psi^{(m)}) &= \sum_{i=1}^p \left\{ \mathbb{E}(z_{i1} | \mathbf{x}_i, \Psi^{(m)}) \log(\pi_1) + \mathbb{E}(z_{i2} | \mathbf{x}_i, \Psi^{(m)}) \log(\pi_2) \right. \\
&\quad + \mathbb{E}(1 - z_{i1} - z_{i2} | \mathbf{x}_i, \Psi^{(m)}) \log(\pi_3) \\
&\quad + \mathbb{E}(z_{i1} | \mathbf{x}_i, \Psi^{(m)}) \log(f_1(\mathbf{x}_i)) + \mathbb{E}(z_{i2} | \mathbf{x}_i, \Psi^{(m)}) \log(f_2(\mathbf{x}_i)) \\
&\quad \left. + \mathbb{E}(1 - z_{i1} - z_{i2} | \mathbf{x}_i, \Psi^{(m)}) \log(f_3(\mathbf{x}_i)) \right\} \\
&= \sum_{i=1}^p \left\{ w_{i1}(\Psi^{(m)}) \log(\pi_1) + w_{i2}(\Psi^{(m)}) \log(\pi_2) \right. \\
&\quad + [1 - w_{i1}(\Psi^{(m)}) - w_{i2}(\Psi^{(m)})] \log(1 - \pi_1 - \pi_2) \\
&\quad + w_{i1}(\Psi^{(m)}) \log(f_1(\mathbf{x}_i)) + w_{i2}(\Psi^{(m)}) \log(f_2(\mathbf{x}_i)) \\
&\quad \left. + [1 - w_{i1}(\Psi^{(m)}) - w_{i2}(\Psi^{(m)})] \log(f_3(\mathbf{x}_i)) \right\}.
\end{aligned} \tag{A13}$$



## H The M-step of the E-M algorithm for 3-mixture distribution

In the M step, we need to maximize the following function

$$\begin{aligned} Q(\Psi|\Psi^{(m)}) = & \log \left[ \frac{\Gamma(b_1 + b_2 + b_3)}{\Gamma(b_1)\Gamma(b_2)\Gamma(b_3)} \right] + \left[ w_1^{(m)} + (b_1 - 1) \right] \log(\pi_1) \\ & + \left[ w_2^{(m)} + (b_2 - 1) \right] \log(\pi_2) + \left[ w_3^{(m)} + (b_3 - 1) \right] \log(1 - \pi_1 - \pi_2) \\ & + \sum_{\ell=1}^3 \sum_{i=1}^p w_{i\ell}^{(m)} \log[f_\ell(\mathbf{x}_i|\boldsymbol{\theta}_\ell)], \end{aligned}$$

where

$$\begin{aligned} w_\ell^{(m)} &= \sum_{i=1}^p w_{i\ell}^{(m)}, \\ w_{i\ell}^{(m)} &= \frac{\pi_\ell f_\ell(\mathbf{x}_i|\boldsymbol{\theta}_\ell^{(m)})}{\sum_{t=1}^3 \pi_t f_t(\mathbf{x}_i|\boldsymbol{\theta}_t^{(m)})} \end{aligned}$$

and the superscript  $(m)$  indicates the number of iterations.

By letting the first derivative to zero, we can get

$$\pi_\ell^{(m+1)} = \frac{\left[ w_\ell^{(m)} + (b_\ell - 1) \right]}{(p + b_1 + b_2 + b_3 - 3)}. \quad (\text{A14})$$

Denote

$$Q_\ell(\Psi|\Psi^{(m)}) = \sum_{i=1}^p w_{i\ell}^{(m)} \log[f_\ell(\mathbf{x}_i|\boldsymbol{\theta}_\ell)]$$

The first derivatives are:

$$\frac{\partial Q_\ell}{\partial \boldsymbol{\theta}_\ell} = \sum_{i=1}^p w_{i\ell}^{(m)} \frac{\partial \log[f_\ell(\mathbf{x}_i|\boldsymbol{\theta}_\ell)]}{\partial \boldsymbol{\theta}_\ell}$$

## H.1 The first derivative of $\partial \log [f_1(\mathbf{x}_i|\boldsymbol{\theta}_1)] / \partial s_{c_1}$

$$\begin{aligned}
\frac{\partial \log [f_1(\mathbf{x}_i|\boldsymbol{\theta}_1)]}{\partial s_{c_1}} &= -\frac{n_c}{2} - \frac{(n_c - 1)}{2n_c} [1 + \exp(r_{c_1})] [a(\mathbf{x}_{ci}, \mu_{c_1})]^T [a(\mathbf{x}_{ci}, \mu_{c_1})] (-1) [\exp(s_{c_1})]^{-2} \exp(s_{c_1}) \\
&\quad + \frac{[a(\mathbf{x}_{ci}, \mu_{c_1})^T \mathbf{1}]^2 \left[ (n_c - 2) + \exp(r_{c_1})(n_c - 1) - \frac{1}{\exp(r_{c_1})} \right]}{2n_c^2} (-1) [\exp(s_{c_1})]^2 \exp(s_{c_1}) \\
&\quad - \frac{n_n}{2} - \frac{(n_n - 1)}{2n_n} [1 + \exp(r_{n_1})] [a(\mathbf{x}_{ni}, \mu_{n_1})]^T [a(\mathbf{x}_{ni}, \mu_{n_1})] (-1) [\exp(s_{c_1} - \exp(\Delta_{n_1}))]^{-2} \\
&\quad \cdot \exp(s_{c_1} - \exp(\Delta_{n_1})) \\
&\quad + \frac{[a(\mathbf{x}_{ni}, \mu_{n_1})^T \mathbf{1}]^2 \left[ (n_n - 2) + \exp(r_{n_1})(n_n - 1) - \frac{1}{\exp(r_{n_1})} \right]}{2n_n^2} (-1) [\exp(s_{c_1} - \exp(\Delta_{n_1}))]^{-2} \\
&\quad \cdot \exp(s_{c_1} - \exp(\Delta_{n_1})) \\
&= -\frac{n}{2} + \frac{(n_c - 1)}{2n_c \exp(s_{c_1})} [1 + \exp(r_{c_1})] [a(\mathbf{x}_{ci}, \mu_{c_1})]^T [a(\mathbf{x}_{ci}, \mu_{c_1})] \\
&\quad - \frac{[a(\mathbf{x}_{ci}, \mu_{c_1})^T \mathbf{1}]^2 \left[ (n_c - 2) + \exp(r_{c_1})(n_c - 1) - \frac{1}{\exp(r_{c_1})} \right]}{2n_c^2 \exp(s_{c_1})} \\
&\quad + \frac{(n_n - 1)}{2n_n \exp[s_{c_1} - \exp(\Delta_{n_1})]} [1 + \exp(r_{n_1})] [a(\mathbf{x}_{ni}, \mu_{n_1})]^T [a(\mathbf{x}_{ni}, \mu_{n_1})] \\
&\quad - \frac{[a(\mathbf{x}_{ni}, \mu_{n_1})^T \mathbf{1}]^2 \left[ (n_n - 2) + \exp(r_{n_1})(n_n - 1) - \frac{1}{\exp(r_{n_1})} \right]}{2n_n^2 \exp[s_{c_1} - \exp(\Delta_{n_1})]}
\end{aligned}$$

## H.2 The first derivative of $\partial \log [f_1(\mathbf{x}_i|\boldsymbol{\theta}_1)] / \partial \Delta_{n_1}$

$$\begin{aligned}
\frac{\partial \log [f_1(\mathbf{x}_i|\boldsymbol{\theta}_1)]}{\partial \Delta_{n_1}} &= -\frac{n_n}{2} (-1) \exp(\Delta_{n_1}) - \frac{[a(\mathbf{x}_{ni}, \mu_{n_1})]^T [a(\mathbf{x}_{ni}, \mu_{n_1})]}{2} \frac{n_n - 1}{n_n} [1 + \exp(r_{n_1})] \frac{\exp(\Delta_{n_1})}{\exp[s_{c_1} - \exp(\Delta_{n_1})]} \\
&\quad + [a(\mathbf{x}_{ni}, \mu_{n_1})^T \mathbf{1}]^2 \frac{\left[ (n_n - 2) + \exp(r_{n_1})(n_n - 1) - \frac{1}{\exp(r_{n_1})} \right]}{2n_n^2} (-1) \frac{\exp(\Delta_{n_1})}{\exp[s_{c_1} - \exp(\Delta_{n_1})]} \\
&= \frac{n_n}{2} \exp(\Delta_{n_1}) - \frac{[a(\mathbf{x}_{ni}, \mu_{n_1})]^T [a(\mathbf{x}_{ni}, \mu_{n_1})]}{2} \frac{n_n - 1}{n_n} [1 + \exp(r_{n_1})] \frac{\exp(\Delta_{n_1})}{\exp[s_{c_1} - \exp(\Delta_{n_1})]} \\
&\quad + [a(\mathbf{x}_{ni}, \mu_{n_1})^T \mathbf{1}]^2 \frac{\left[ (n_n - 2) + \exp(r_{n_1})(n_n - 1) - \frac{1}{\exp(r_{n_1})} \right]}{2n_n^2} \frac{\exp(\Delta_{n_1})}{\exp[s_{c_1} - \exp(\Delta_{n_1})]}
\end{aligned}$$

### H.3 The first derivative of $\partial \log [f_1(\mathbf{x}_i|\boldsymbol{\theta}_1)] / \partial r_{c_1}$

$$\begin{aligned}
\frac{\partial \log [f_1(\mathbf{x}_i|\boldsymbol{\theta}_1)]}{\partial r_{c_1}} &= \frac{n_c}{2} \frac{\exp(r_{c_1})}{1 + \exp(r_{c_1})} - \frac{1}{2} \\
&\quad - \frac{[a(\mathbf{x}_{ci}, \mu_{c_1})]^T [a(\mathbf{x}_{ci}, \mu_{c_1})]}{2 \exp(s_{c_1})} \frac{n_c - 1}{n_c} \exp(r_{c_1}) \\
&\quad + \frac{[a(\mathbf{x}_{ci}, \mu_{c_1})^T \mathbf{1}]^2 [\exp(r_{c_1})(n_c - 1) - (-1) [\exp(r_{c_1})]^2 \exp(r_{c_1})]}{2 \exp(s_{c_1}) n_c^2} \\
&= \frac{n_c}{2} \frac{\exp(r_{c_1})}{1 + \exp(r_{c_1})} - \frac{1}{2} \\
&\quad - \frac{[a(\mathbf{x}_{ci}, \mu_{c_1})]^T [a(\mathbf{x}_{ci}, \mu_{c_1})]}{2 \exp(s_{c_1})} \frac{n_c - 1}{n_c} \exp(r_{c_1}) \\
&\quad + \frac{[a(\mathbf{x}_{ci}, \mu_{c_1})^T \mathbf{1}]^2 [\exp(r_{c_1})(n_c - 1) + \frac{1}{\exp(r_{c_1})}]}{2 \exp(s_{c_1}) n_c^2}
\end{aligned}$$

### H.4 The first derivative of $\partial \log [f_1(\mathbf{x}_i|\boldsymbol{\theta}_1)] / \partial r_{n_1}$

$$\begin{aligned}
\frac{\partial \log [f_1(\mathbf{x}_i|\boldsymbol{\theta}_1)]}{\partial r_{n_1}} &= \frac{n_n}{2} \frac{\exp(r_{n_1})}{1 + \exp(r_{n_1})} - \frac{1}{2} \\
&\quad - \frac{[a(\mathbf{x}_{ni}, \mu_{n_1})]^T [a(\mathbf{x}_{ni}, \mu_{n_1})]}{2 \exp[s_{n_1} - \exp(\Delta_{n_1})]} \frac{n_n - 1}{n_n} \exp(r_{n_1}) \\
&\quad + \frac{[a(\mathbf{x}_{ni}, \mu_{n_1})^T \mathbf{1}]^2 [\exp(r_{n_1})(n_n - 1) - (-1) [\exp(r_{n_1})]^2 \exp(r_{n_1})]}{2 \exp[s_{n_1} - \exp(\Delta_{n_1})] n_n^2} \\
&= \frac{n_n}{2} \frac{\exp(r_{n_1})}{1 + \exp(r_{n_1})} - \frac{1}{2} \\
&\quad - \frac{[a(\mathbf{x}_{ni}, \mu_{n_1})]^T [a(\mathbf{x}_{ni}, \mu_{n_1})]}{2 \exp[s_{n_1} - \exp(\Delta_{n_1})]} \frac{n_n - 1}{n_n} \exp(r_{n_1}) \\
&\quad + \frac{[a(\mathbf{x}_{ni}, \mu_{n_1})^T \mathbf{1}]^2 [\exp(r_{n_1})(n_n - 1) + \frac{1}{\exp(r_{n_1})}]}{2 \exp[s_{n_1} - \exp(\Delta_{n_1})] n_n^2}
\end{aligned}$$

### H.5 The first derivative of $\partial \log [f_1(\mathbf{x}_i|\boldsymbol{\theta}_1)] / \partial \mu_{c_1}$

$$\begin{aligned} \frac{\partial \log [f_1(\mathbf{x}_i|\boldsymbol{\theta}_1)]}{\partial \mu_{c_1}} &= -\frac{1}{2 \exp(s_{c_1})} \frac{n_c - 1}{n_c} [1 + \exp(r_{c_1})] 2 \left( n_c \mu_{c_1} - \mathbf{1}^T \mathbf{x}_c \right) \\ &\quad + \frac{\left[ (n_c - 2) + \exp(r_{c_1})(n_c - 1) - \frac{1}{\exp(r_{c_1})} \right]}{2 \exp(s_{c_1}) n_c^2} 2 n_c \left( n_c \mu_{c_1} - \mathbf{1}^T \mathbf{x}_c \right) \\ &= -\frac{(n_c \mu_{c_1} - \mathbf{1}^T \mathbf{x}_c)}{\exp(s_{c_1})} \frac{n_c - 1}{n_c} [1 + \exp(r_{c_1})] \\ &\quad + \frac{(n_c \mu_{c_1} - \mathbf{1}^T \mathbf{x}_c) \left[ (n_c - 2) + \exp(r_{c_1})(n_c - 1) - \frac{1}{\exp(r_{c_1})} \right]}{\exp(s_{c_1}) n_c} \end{aligned}$$

### H.6 The first derivative of $\partial \log [f_1(\mathbf{x}_i|\boldsymbol{\theta}_1)] / \partial \mu_{n_1}$

$$\begin{aligned} \frac{\partial \log [f_1(\mathbf{x}_i|\boldsymbol{\theta}_1)]}{\partial \mu_{n_1}} &= -\frac{(n_n \mu_{n_1} - \mathbf{1}^T \mathbf{x}_n)}{\exp[s_{c_1} - \exp(\Delta_{n_1})]} \frac{n_n - 1}{n_n} [1 + \exp(r_{n_1})] \\ &\quad + \frac{(n_n \mu_{n_1} - \mathbf{1}^T \mathbf{x}_n) \left[ (n_n - 2) + \exp(r_{n_1})(n_n - 1) - \frac{1}{\exp(r_{n_1})} \right]}{\exp[s_{c_1} - \exp(\Delta_{n_1})] n_n} \end{aligned}$$

### H.7 The first derivative of $\partial \log [f_2(\mathbf{x}_i|\boldsymbol{\theta}_2)] / \partial s_2$

$$\begin{aligned} \frac{\partial \log [f_2(\mathbf{x}_i|\boldsymbol{\theta}_2)]}{\partial s_2} &= -\frac{n}{2} + \frac{[a(\mathbf{x}_{ci}, \mu_{c_2})]^T [a(\mathbf{x}_{ci}, \mu_{c_2})]}{2 \exp(s_2)} \frac{n_c - 1}{n_c} [1 + \exp(r_{c_2})] \\ &\quad - \frac{[a(\mathbf{x}_{ci}, \mu_{c_2})^T \mathbf{1}]^2 \left[ (n_c - 2) + \exp(r_{c_2})(n_c - 1) - \frac{1}{\exp(r_{c_2})} \right]}{2 \exp(s_2) n_c^2} \\ &\quad + \frac{[a(\mathbf{x}_{ni}, \mu_{n_2})]^T [a(\mathbf{x}_{ni}, \mu_{n_2})]}{2 \exp(s_2)} \frac{n_n - 1}{n_n} [1 + \exp(r_{n_2})] \\ &\quad - \frac{[a(\mathbf{x}_{ni}, \mu_{n_2})^T \mathbf{1}]^2 \left[ (n_n - 2) + \exp(r_{n_2})(n_n - 1) - \frac{1}{\exp(r_{n_2})} \right]}{2 \exp(s_2) n_n^2} \end{aligned}$$

### H.8 The first derivative of $\partial \log [f_2(\mathbf{x}_i|\boldsymbol{\theta}_2)] / \partial r_{c_2}$

$$\begin{aligned} \frac{\partial \log [f_2(\mathbf{x}_i|\boldsymbol{\theta}_2)]}{\partial r_{c_2}} &= \frac{n_c}{2} \frac{\exp(r_{c_2})}{1 + \exp(r_{c_2})} - \frac{1}{2} \\ &\quad - \frac{[a(\mathbf{x}_{ci}, \mu_{c_2})]^T [a(\mathbf{x}_{ci}, \mu_{c_2})]}{2 \exp(s_2)} \frac{n_c - 1}{n_c} \exp(r_{c_2}) \\ &\quad + \frac{[a(\mathbf{x}_{ci}, \mu_{c_2})^T \mathbf{1}]^2 \left[ \exp(r_{c_2})(n_c - 1) + \frac{1}{\exp(r_{c_2})} \right]}{2 \exp(s_2) n_c^2} \end{aligned}$$

### H.9 The first derivative of $\partial \log [f_2(\mathbf{x}_i|\boldsymbol{\theta}_2)] / \partial r_{n_2}$

$$\begin{aligned} \frac{\partial \log [f_2(\mathbf{x}_i|\boldsymbol{\theta}_2)]}{\partial r_{n_2}} &= \frac{n_n}{2} \frac{\exp(r_{n_2})}{1 + \exp(r_{n_2})} - \frac{1}{2} \\ &\quad - \frac{[a(\mathbf{x}_{ci}, \mu_{n_2})]^T [a(\mathbf{x}_{ni}, \mu_{n_2})]}{2 \exp(s_2)} \frac{n_n - 1}{n_n} \exp(r_{n_2}) \\ &\quad + \frac{[a(\mathbf{x}_{ni}, \mu_{n_2})^T \mathbf{1}]^2 \left[ \exp(r_{n_2})(n_n - 1) + \frac{1}{\exp(r_{n_2})} \right]}{2 \exp(s_2) n_n^2} \end{aligned}$$

### H.10 The first derivative of $\partial \log [f_2(\mathbf{x}_i|\boldsymbol{\theta}_2)] / \partial \mu_{c_2}$

$$\begin{aligned} \frac{\partial \log [f_2(\mathbf{x}_i|\boldsymbol{\theta}_2)]}{\partial \mu_{c_2}} &= - \frac{1}{2 \exp(s_2)} \frac{n_c - 1}{n_c} [1 + \exp(r_{c_2})] 2 (n_c \mu_{c_2} - \mathbf{1}^T \mathbf{x}_c) \\ &\quad + \frac{\left[ (n_c - 2) + \exp(r_{c_2})(n_c - 1) - \frac{1}{\exp(r_{c_2})} \right]}{2 \exp(s_2) n_c^2} 2 n_c (n_c \mu_{c_2} - \mathbf{1}^T \mathbf{x}_c) \\ &= - \frac{(n_c \mu_{c_2} - \mathbf{1}^T \mathbf{x}_c)}{\exp(s_2)} \frac{n_c - 1}{n_c} [1 + \exp(r_{c_2})] \\ &\quad + \frac{(n_c \mu_{c_2} - \mathbf{1}^T \mathbf{x}_c) \left[ (n_c - 2) + \exp(r_{c_2})(n_c - 1) - \frac{1}{\exp(r_{c_2})} \right]}{\exp(s_2) n_c} \end{aligned}$$

### H.11 The first derivative of $\partial \log [f_2(\mathbf{x}_i|\boldsymbol{\theta}_2)] / \partial \mu_{n_2}$

$$\begin{aligned} \frac{\partial \log [f_2(\mathbf{x}_i|\boldsymbol{\theta}_2)]}{\partial \mu_{n_2}} &= - \frac{1}{2 \exp(s_2)} \frac{n_n - 1}{n_n} [1 + \exp(r_{n_2})] 2 (n_n \mu_{n_2} - \mathbf{1}^T \mathbf{x}_n) \\ &\quad + \frac{\left[ (n_n - 2) + \exp(r_{n_2})(n_n - 1) - \frac{1}{\exp(r_{n_2})} \right]}{2 \exp(s_2) n_n^2} 2 n_n (n_n \mu_{n_2} - \mathbf{1}^T \mathbf{x}_n) \\ &= - \frac{(n_n \mu_{n_2} - \mathbf{1}^T \mathbf{x}_n)}{\exp(s_2)} \frac{n_n - 1}{n_n} [1 + \exp(r_{n_2})] \\ &\quad + \frac{(n_n \mu_{n_2} - \mathbf{1}^T \mathbf{x}_n) \left[ (n_n - 2) + \exp(r_{n_2})(n_n - 1) - \frac{1}{\exp(r_{n_2})} \right]}{\exp(s_2) n_n} \end{aligned}$$

## H.12 The first derivative of $\partial \log [f_3(\mathbf{x}_i|\boldsymbol{\theta}_3)] / \partial s_{c_3}$

$$\begin{aligned}
\frac{\partial \log [f_3(\mathbf{x}_i|\boldsymbol{\theta}_3)]}{\partial s_{c_3}} &= -\frac{n_c}{2} - \frac{(n_c - 1)}{2n_c} [1 + \exp(r_{c_3})] [a(\mathbf{x}_{ci}, \mu_{c_3})]^T [a(\mathbf{x}_{ci}, \mu_{c_3})] (-1) [\exp(s_{c_3})]^{-2} \exp(s_{c_3}) \\
&\quad + \frac{\left[ a(\mathbf{x}_{ci}, \mu_{c_3})^T \mathbf{1} \right]^2 \left[ (n_c - 2) + \exp(r_{c_3})(n_c - 1) - \frac{1}{\exp(r_{c_3})} \right]}{2n_c^2} (-1) [\exp(s_{c_3})]^2 \exp(s_{c_3}) \\
&\quad - \frac{n_n}{2} - \frac{(n_n - 1)}{2n_n} [1 + \exp(r_{n_3})] [a(\mathbf{x}_{ni}, \mu_{n_3})]^T [a(\mathbf{x}_{ni}, \mu_{n_3})] (-1) [\exp(s_{c_3} + \exp(\Delta_{n_3}))]^{-2} \\
&\quad \cdot \exp(s_{c_3} + \exp(\Delta_{n_3})) \\
&\quad + \frac{\left[ a(\mathbf{x}_{ni}, \mu_{n_3})^T \mathbf{1} \right]^2 \left[ (n_n - 2) + \exp(r_{n_3})(n_n - 1) - \frac{1}{\exp(r_{n_3})} \right]}{2n_n^2} (-1) [\exp(s_{c_3} + \exp(\Delta_{n_3}))]^{-2} \\
&\quad \cdot \exp(s_{c_3} + \exp(\Delta_{n_3})) \\
&= -\frac{n}{2} + \frac{(n_c - 1)}{2n_c \exp(s_{c_3})} [1 + \exp(r_{c_3})] [a(\mathbf{x}_{ci}, \mu_{c_3})]^T [a(\mathbf{x}_{ci}, \mu_{c_3})] \\
&\quad - \frac{\left[ a(\mathbf{x}_{ci}, \mu_{c_3})^T \mathbf{1} \right]^2 \left[ (n_c - 2) + \exp(r_{c_3})(n_c - 1) - \frac{1}{\exp(r_{c_3})} \right]}{2n_c^2 \exp(s_{c_3})} \\
&\quad + \frac{(n_n - 1)}{2n_n \exp[s_{c_3} + \exp(\Delta_{n_3})]} [1 + \exp(r_{n_3})] [a(\mathbf{x}_{ni}, \mu_{n_3})]^T [a(\mathbf{x}_{ni}, \mu_{n_3})] \\
&\quad - \frac{\left[ a(\mathbf{x}_{ni}, \mu_{n_3})^T \mathbf{1} \right]^2 \left[ (n_n - 2) + \exp(r_{n_3})(n_n - 1) - \frac{1}{\exp(r_{n_3})} \right]}{2n_n^2 \exp[s_{c_3} + \exp(\Delta_{n_3})]}
\end{aligned}$$

## H.13 The first derivative of $\partial \log [f_3(\mathbf{x}_i|\boldsymbol{\theta}_3)] / \partial \Delta_{n_3}$

$$\begin{aligned}
\frac{\partial \log [f_3(\mathbf{x}_i|\boldsymbol{\theta}_3)]}{\partial \Delta_{n_3}} &= -\frac{n_n}{2} \exp(\Delta_{n_3}) - \frac{[a(\mathbf{x}_{ni}, \mu_{n_3})]^T [a(\mathbf{x}_{ni}, \mu_{n_3})]}{2} \frac{n_n - 1}{n_n} [1 + \exp(r_{n_3})] \frac{(-1) \exp(\Delta_{n_3})}{\exp[s_{c_3} + \exp(\Delta_{n_3})]} \\
&\quad + \left[ a(\mathbf{x}_{ni}, \mu_{n_3})^T \mathbf{1} \right]^2 \frac{\left[ (n_n - 2) + \exp(r_{n_3})(n_n - 1) - \frac{1}{\exp(r_{n_3})} \right]}{2n_n^2} (-1) \frac{\exp(\Delta_{n_3})}{\exp[s_{c_3} + \exp(\Delta_{n_3})]} \\
&= -\frac{n_n}{2} \exp(\Delta_{n_3}) - \frac{[a(\mathbf{x}_{ni}, \mu_{n_3})]^T [a(\mathbf{x}_{ni}, \mu_{n_3})]}{2} \frac{n_n - 1}{n_n} [1 + \exp(r_{n_3})] \frac{\exp(\Delta_{n_3})}{\exp[s_{c_3} + \exp(\Delta_{n_3})]} \\
&\quad - \left[ a(\mathbf{x}_{ni}, \mu_{n_3})^T \mathbf{1} \right]^2 \frac{\left[ (n_n - 2) + \exp(r_{n_3})(n_n - 1) - \frac{1}{\exp(r_{n_3})} \right]}{2n_n^2} \frac{\exp(\Delta_{n_3})}{\exp[s_{c_3} + \exp(\Delta_{n_3})]}
\end{aligned}$$

#### H.14 The first derivative of $\partial \log [f_3(\mathbf{x}_i|\boldsymbol{\theta}_3)] / \partial r_{c_3}$

$$\begin{aligned} \frac{\partial \log [f_3(\mathbf{x}_i|\boldsymbol{\theta}_3)]}{\partial r_{c_3}} &= \frac{n_c}{2} \frac{\exp(r_{c_3})}{1 + \exp(r_{c_3})} - \frac{1}{2} \\ &\quad - \frac{[a(\mathbf{x}_{ci}, \mu_{c_3})]^T [a(\mathbf{x}_{ci}, \mu_{c_3})]}{2 \exp(s_{c_3})} \frac{n_c - 1}{n_c} \exp(r_{c_3}) \\ &\quad + \frac{[a(\mathbf{x}_{ci}, \mu_{c_3})^T \mathbf{1}]^2 \left[ \exp(r_{c_3})(n_c - 1) + \frac{1}{\exp(r_{c_3})} \right]}{2 \exp(s_{c_3}) n_c^2} \end{aligned}$$

#### H.15 The first derivative of $\partial \log [f_3(\mathbf{x}_i|\boldsymbol{\theta}_3)] / \partial r_{n_3}$

$$\begin{aligned} \frac{\partial \log [f_3(\mathbf{x}_i|\boldsymbol{\theta}_3)]}{\partial r_{n_3}} &= \frac{n_n}{2} \frac{\exp(r_{n_3})}{1 + \exp(r_{n_3})} - \frac{1}{2} \\ &\quad - \frac{[a(\mathbf{x}_{ni}, \mu_{n_3})]^T [a(\mathbf{x}_{ni}, \mu_{n_3})]}{2 \exp[s_{n_3} + \exp(\Delta_{n_3})]} \frac{n_n - 1}{n_n} \exp(r_{n_3}) \\ &\quad + \frac{[a(\mathbf{x}_{ni}, \mu_{n_3})^T \mathbf{1}]^2 \left[ \exp(r_{n_3})(n_n - 1) + \frac{1}{\exp(r_{n_3})} \right]}{2 \exp[s_{n_3} + \exp(\Delta_{n_3})] n_n^2} \end{aligned}$$

#### H.16 The first derivative of $\partial \log [f_3(\mathbf{x}_i|\boldsymbol{\theta}_3)] / \partial \mu_{c_3}$

$$\begin{aligned} \frac{\partial \log [f_3(\mathbf{x}_i|\boldsymbol{\theta}_3)]}{\partial \mu_{c_3}} &= - \frac{1}{2 \exp(s_{c_3})} \frac{n_c - 1}{n_c} [1 + \exp(r_{c_3})] 2 (n_c \mu_{c_3} - \mathbf{1}^T \mathbf{x}_c) \\ &\quad + \frac{\left[ (n_c - 2) + \exp(r_{c_3})(n_c - 1) - \frac{1}{\exp(r_{c_3})} \right]}{2 \exp(s_{c_3}) n_c^2} 2 n_c (n_c \mu_{c_3} - \mathbf{1}^T \mathbf{x}_c) \\ &= - \frac{(n_c \mu_{c_3} - \mathbf{1}^T \mathbf{x}_c)}{\exp(s_{c_3})} \frac{n_c - 1}{n_c} [1 + \exp(r_{c_3})] \\ &\quad + \frac{(n_c \mu_{c_3} - \mathbf{1}^T \mathbf{x}_c) \left[ (n_c - 2) + \exp(r_{c_3})(n_c - 1) - \frac{1}{\exp(r_{c_3})} \right]}{\exp(s_{c_3}) n_c} \end{aligned}$$

#### H.17 The first derivative of $\partial \log [f_3(\mathbf{x}_i|\boldsymbol{\theta}_3)] / \partial \mu_{n_3}$

$$\begin{aligned} \frac{\partial \log [f_3(\mathbf{x}_i|\boldsymbol{\theta}_3)]}{\partial \mu_{n_3}} &= - \frac{(n_n \mu_{n_3} - \mathbf{1}^T \mathbf{x}_n)}{\exp[s_{c_3} + \exp(\Delta_{n_3})]} \frac{n_n - 1}{n_n} [1 + \exp(r_{n_3})] \\ &\quad + \frac{(n_n \mu_{n_3} - \mathbf{1}^T \mathbf{x}_n) \left[ (n_n - 2) + \exp(r_{n_3})(n_n - 1) - \frac{1}{\exp(r_{n_3})} \right]}{\exp[s_{c_3} + \exp(\Delta_{n_3})] n_n} \end{aligned}$$

## H.18 The first derivatives of $Q_\ell$

The first derivatives are:

$$\frac{\partial Q_\ell}{\partial \boldsymbol{\theta}_\ell} = \sum_{i=1}^p w_{i\ell}^{(m)} \frac{\partial \log [f_\ell(\mathbf{x}_i | \boldsymbol{\theta}_\ell)]}{\partial \boldsymbol{\theta}_\ell}$$

## H.19 The first derivative of $\partial Q_1 / \partial s_{c_1}$

$$\begin{aligned} \frac{\partial Q_1}{\partial s_{c_1}} = & -\frac{n}{2} \sum_{i=1}^p w_{i1}^{(m)} + \frac{(n_c - 1)}{2n_c \exp(s_{c_1})} [1 + \exp(r_{c_1})] \sum_{i=1}^p w_{i1}^{(m)} [a(\mathbf{x}_{ci}, \mu_{c_1})]^T [a(\mathbf{x}_{ci}, \mu_{c_1})] \\ & - \frac{\left[ (n_c - 2) + \exp(r_{c_1})(n_c - 1) - \frac{1}{\exp(r_{c_1})} \right]}{2n_c^2 \exp(s_{c_1})} \sum_{i=1}^p w_{i1}^{(m)} \left[ a(\mathbf{x}_{ci}, \mu_{c_1})^T \mathbf{1} \right]^2 \\ & + \frac{(n_n - 1)}{2n_n \exp[s_{c_1} - \exp(\Delta_{n_1})]} [1 + \exp(r_{n_1})] \sum_{i=1}^p w_{i1}^{(m)} [a(\mathbf{x}_{ni}, \mu_{n_1})]^T [a(\mathbf{x}_{ni}, \mu_{n_1})] \\ & - \frac{\left[ (n_n - 2) + \exp(r_{n_1})(n_n - 1) - \frac{1}{\exp(r_{n_1})} \right]}{2n_n^2 \exp[s_{c_1} - \exp(\Delta_{n_1})]} \sum_{i=1}^p w_{i1}^{(m)} \left[ a(\mathbf{x}_{ni}, \mu_{n_1})^T \mathbf{1} \right]^2 \end{aligned}$$

## H.20 The first derivative of $\partial Q_1 / \partial \Delta_{n_1}$

$$\begin{aligned} \frac{\partial Q_1}{\partial \Delta_{n_1}} = & \frac{n_n}{2} \exp(\Delta_{n_1}) \sum_{i=1}^p w_{i1}^{(m)} - \frac{n_n - 1}{2n_n} [1 + \exp(r_{n_1})] \frac{\exp(\Delta_{n_1})}{\exp[s_{c_1} - \exp(\Delta_{n_1})]} \sum_{i=1}^p w_{i1}^{(m)} [a(\mathbf{x}_{ni}, \mu_{n_1})]^T [a(\mathbf{x}_{ni}, \mu_{n_1})] \\ & + \frac{\left[ (n_n - 2) + \exp(r_{n_1})(n_n - 1) - \frac{1}{\exp(r_{n_1})} \right]}{2n_n^2} \frac{\exp(\Delta_{n_1})}{\exp[s_{c_1} - \exp(\Delta_{n_1})]} \sum_{i=1}^p w_{i1}^{(m)} \left[ a(\mathbf{x}_{ni}, \mu_{n_1})^T \mathbf{1} \right]^2 \end{aligned}$$

## H.21 The first derivative of $\partial Q_1 / \partial r_{c_1}$

$$\begin{aligned} \frac{\partial Q_1}{\partial r_{c_1}} = & \left[ \frac{n_c}{2} \frac{\exp(r_{c_1})}{1 + \exp(r_{c_1})} - \frac{1}{2} \right] \sum_{i=1}^p w_{i1}^{(m)} \\ & - \frac{1}{2 \exp(s_{c_1})} \frac{n_c - 1}{n_c} \exp(r_{c_1}) \sum_{i=1}^p w_{i1}^{(m)} [a(\mathbf{x}_{ci}, \mu_{c_1})]^T [a(\mathbf{x}_{ci}, \mu_{c_1})] \\ & + \frac{\left[ \exp(r_{c_1})(n_c - 1) + \frac{1}{\exp(r_{c_1})} \right]}{2 \exp(s_{c_1}) n_c^2} \sum_{i=1}^p w_{i1}^{(m)} \left[ a(\mathbf{x}_{ci}, \mu_{c_1})^T \mathbf{1} \right]^2 \end{aligned}$$



## H.22 The first derivative of $\partial Q_1/\partial r_{n_1}$

$$\begin{aligned}\frac{\partial Q_1}{\partial r_{n_1}} = & \left[ \frac{n_n}{2} \frac{\exp(r_{n_1})}{1 + \exp(r_{n_1})} - \frac{1}{2} \right] \sum_{i=1}^p w_{i1}^{(m)} \\ & - \frac{1}{2 \exp[s_{n_1} - \exp(\Delta_{n_1})]} \frac{n_n - 1}{n_n} \exp(r_{n_1}) \sum_{i=1}^p w_{i1}^{(m)} [a(\mathbf{x}_{ni}, \mu_{n_1})]^T [a(\mathbf{x}_{ni}, \mu_{n_1})] \\ & + \frac{\left[ \exp(r_{n_1})(n_n - 1) + \frac{1}{\exp(r_{n_1})} \right]}{2 \exp[s_{n_1} - \exp(\Delta_{n_1})] n_n^2} \sum_{i=1}^p w_{i1}^{(m)} [a(\mathbf{x}_{ni}, \mu_{n_1})^T \mathbf{1}]^2\end{aligned}$$

## H.23 The first derivative of $\partial Q_1/\partial \mu_{c_1}$

$$\begin{aligned}\frac{\partial Q_1}{\partial \mu_{c_1}} = & - \frac{1}{\exp(s_{c_1})} \frac{n_c - 1}{n_c} [1 + \exp(r_{c_1})] \sum_{i=1}^p w_{i1}^{(m)} (n_c \mu_{c_1} - \mathbf{1}^T \mathbf{x}_c) \\ & + \frac{\left[ (n_c - 2) + \exp(r_{c_1})(n_c - 1) - \frac{1}{\exp(r_{c_1})} \right]}{\exp(s_{c_1}) n_c} \sum_{i=1}^p w_{i1}^{(m)} (n_c \mu_{c_1} - \mathbf{1}^T \mathbf{x}_c)\end{aligned}$$

## H.24 The first derivative of $\partial Q_1/\partial \mu_{n_1}$

$$\begin{aligned}\frac{\partial Q_1}{\partial \mu_{n_1}} = & - \frac{1}{\exp[s_{c_1} - \exp(\Delta_{n_1})]} \frac{n_n - 1}{n_n} [1 + \exp(r_{n_1})] \sum_{i=1}^p w_{i1}^{(m)} (n_n \mu_{n_1} - \mathbf{1}^T \mathbf{x}_n) \\ & + \frac{\left[ (n_n - 2) + \exp(r_{n_1})(n_n - 1) - \frac{1}{\exp(r_{n_1})} \right]}{\exp[s_{c_1} - \exp(\Delta_{n_1})] n_n} \sum_{i=1}^p w_{i1}^{(m)} (n_n \mu_{n_1} - \mathbf{1}^T \mathbf{x}_n)\end{aligned}$$

## H.25 The first derivative of $\partial Q_2/\partial s_2$

$$\begin{aligned}\frac{\partial Q_2}{\partial s_2} = & - \frac{n}{2} \sum_{i=1}^p w_{i2}^{(m)} + \frac{1}{2 \exp(s_2)} \frac{n_c - 1}{n_c} [1 + \exp(r_{c_2})] \sum_{i=1}^p w_{i2}^{(m)} [a(\mathbf{x}_{ci}, \mu_{c_2})]^T [a(\mathbf{x}_{ci}, \mu_{c_2})] \\ & - \frac{\left[ (n_c - 2) + \exp(r_{c_2})(n_c - 1) - \frac{1}{\exp(r_{c_2})} \right]}{2 \exp(s_2) n_c^2} \sum_{i=1}^p w_{i2}^{(m)} [a(\mathbf{x}_{ci}, \mu_{c_2})^T \mathbf{1}]^2 \\ & + \frac{1}{2 \exp(s_2)} \frac{n_n - 1}{n_n} [1 + \exp(r_{n_2})] \sum_{i=1}^p w_{i2}^{(m)} [a(\mathbf{x}_{ni}, \mu_{n_2})]^T [a(\mathbf{x}_{ni}, \mu_{n_2})] \\ & - \frac{\left[ (n_n - 2) + \exp(r_{n_2})(n_n - 1) - \frac{1}{\exp(r_{n_2})} \right]}{2 \exp(s_2) n_n^2} \sum_{i=1}^p w_{i2}^{(m)} [a(\mathbf{x}_{ni}, \mu_{n_2})^T \mathbf{1}]^2\end{aligned}$$

## H.26 The first derivative of $\partial Q_2/\partial r_{c_2}$

$$\begin{aligned}\frac{\partial Q_2}{\partial r_{c_2}} &= \left[ \frac{n_c}{2} \frac{\exp(r_{c_2})}{1 + \exp(r_{c_2})} - \frac{1}{2} \right] \sum_{i=1}^p w_{i2}^{(m)} \\ &\quad - \frac{1}{2 \exp(s_2)} \frac{n_c - 1}{n_c} \exp(r_{c_2}) \sum_{i=1}^p w_{i2}^{(m)} [a(\mathbf{x}_{ci}, \mu_{c_2})]^T [a(\mathbf{x}_{ci}, \mu_{c_2})] \\ &\quad + \frac{\left[ \exp(r_{c_2})(n_c - 1) + \frac{1}{\exp(r_{c_2})} \right]}{2 \exp(s_2) n_c^2} \sum_{i=1}^p w_{i2}^{(m)} [a(\mathbf{x}_{ci}, \mu_{c_2})^T \mathbf{1}]^2\end{aligned}$$

## H.27 The first derivative of $\partial Q_2/\partial r_{n_2}$

$$\begin{aligned}\frac{\partial Q_2}{\partial r_{n_2}} &= \left[ \frac{n_n}{2} \frac{\exp(r_{n_2})}{1 + \exp(r_{n_2})} - \frac{1}{2} \right] \sum_{i=1}^p w_{i2}^{(m)} \\ &\quad - \frac{1}{2 \exp(s_2)} \frac{n_n - 1}{n_n} \exp(r_{n_2}) \sum_{i=1}^p w_{i2}^{(m)} [a(\mathbf{x}_{ni}, \mu_{n_2})]^T [a(\mathbf{x}_{ni}, \mu_{n_2})] \\ &\quad + \frac{\left[ \exp(r_{n_2})(n_n - 1) + \frac{1}{\exp(r_{n_2})} \right]}{2 \exp(s_2) n_n^2} \sum_{i=1}^p w_{i2}^{(m)} [a(\mathbf{x}_{ni}, \mu_{n_2})^T \mathbf{1}]^2\end{aligned}$$

## H.28 The first derivative of $\partial Q_2/\partial \mu_{c_2}$

$$\begin{aligned}\frac{\partial Q_2}{\partial \mu_{c_2}} &= - \frac{1}{\exp(s_2)} \frac{n_c - 1}{n_c} [1 + \exp(r_{c_2})] \sum_{i=1}^p w_{i2}^{(m)} (n_c \mu_{c_2} - \mathbf{1}^T \mathbf{x}_c) \\ &\quad + \frac{\left[ (n_c - 2) + \exp(r_{c_2})(n_c - 1) - \frac{1}{\exp(r_{c_2})} \right]}{\exp(s_2) n_c} \sum_{i=1}^p w_{i2}^{(m)} (n_c \mu_{c_2} - \mathbf{1}^T \mathbf{x}_c)\end{aligned}$$

## H.29 The first derivative of $\partial Q_2/\partial \mu_{n_2}$

$$\begin{aligned}\frac{\partial Q_2}{\partial \mu_{n_2}} &= - \frac{1}{\exp(s_2)} \frac{n_n - 1}{n_n} [1 + \exp(r_{n_2})] \sum_{i=1}^p w_{i2}^{(m)} (n_n \mu_{n_2} - \mathbf{1}^T \mathbf{x}_n) \\ &\quad + \frac{\left[ (n_n - 2) + \exp(r_{n_2})(n_n - 1) - \frac{1}{\exp(r_{n_2})} \right]}{\exp(s_2) n_n} \sum_{i=1}^p w_{i2}^{(m)} (n_n \mu_{n_2} - \mathbf{1}^T \mathbf{x}_n)\end{aligned}$$

### H.30 The first derivative of $\partial Q_3/\partial s_{c_3}$

$$\begin{aligned}\frac{\partial Q_3}{\partial s_{c_3}} = & -\frac{n}{2} \sum_{i=1}^p w_{i3}^{(m)} + \frac{(n_c - 1)}{2n_c \exp(s_{c_3})} [1 + \exp(r_{c_3})] \sum_{i=1}^p w_{i3}^{(m)} [a(\mathbf{x}_{ci}, \mu_{c_3})]^T [a(\mathbf{x}_{ci}, \mu_{c_3})] \\ & - \frac{\left[ (n_c - 2) + \exp(r_{c_3})(n_c - 1) - \frac{1}{\exp(r_{c_3})} \right]}{2n_c^2 \exp(s_{c_3})} \sum_{i=1}^p w_{i3}^{(m)} \left[ a(\mathbf{x}_{ci}, \mu_{c_3})^T \mathbf{1} \right]^2 \\ & + \frac{(n_n - 1)}{2n_n \exp[s_{c_3} + \exp(\Delta_{n_3})]} [1 + \exp(r_{n_3})] \sum_{i=1}^p w_{i3}^{(m)} [a(\mathbf{x}_{ni}, \mu_{n_3})]^T [a(\mathbf{x}_{ni}, \mu_{n_3})] \\ & - \frac{\left[ (n_n - 2) + \exp(r_{n_3})(n_n - 1) - \frac{1}{\exp(r_{n_3})} \right]}{2n_n^2 \exp[s_{c_3} + \exp(\Delta_{n_3})]} \sum_{i=1}^p w_{i3}^{(m)} \left[ a(\mathbf{x}_{ni}, \mu_{n_3})^T \mathbf{1} \right]^2\end{aligned}$$

### H.31 The first derivative of $\partial Q_3/\partial \Delta_{n_3}$

$$\begin{aligned}\frac{\partial Q_3}{\partial \Delta_{n_3}} = & -\frac{n_n}{2} \exp(\Delta_{n_3}) \sum_{i=1}^p w_{i3}^{(m)} - \frac{1}{2} \frac{n_n - 1}{n_n} [1 + \exp(r_{n_3})] \frac{\exp(\Delta_{n_3})}{\exp[s_{c_3} + \exp(\Delta_{n_3})]} \sum_{i=1}^p w_{i3}^{(m)} [a(\mathbf{x}_{ni}, \mu_{n_3})]^T [a(\mathbf{x}_{ni}, \mu_{n_3})] \\ & - \frac{\left[ (n_n - 2) + \exp(r_{n_3})(n_n - 1) - \frac{1}{\exp(r_{n_3})} \right]}{2n_n^2} \frac{\exp(\Delta_{n_3})}{\exp[s_{c_3} + \exp(\Delta_{n_3})]} \sum_{i=1}^p w_{i3}^{(m)} \left[ a(\mathbf{x}_{ni}, \mu_{n_3})^T \mathbf{1} \right]^2\end{aligned}$$

### H.32 The first derivative of $\partial Q_3/\partial r_{c_3}$

$$\begin{aligned}\frac{\partial Q_3}{\partial r_{c_3}} = & \left[ \frac{n_c}{2} \frac{\exp(r_{c_3})}{1 + \exp(r_{c_3})} - \frac{1}{2} \right] \sum_{i=1}^p w_{i3}^{(m)} \\ & - \frac{1}{2 \exp(s_{c_3})} \frac{n_c - 1}{n_c} \exp(r_{c_3}) \sum_{i=1}^p w_{i3}^{(m)} [a(\mathbf{x}_{ci}, \mu_{c_3})]^T [a(\mathbf{x}_{ci}, \mu_{c_3})] \\ & + \frac{\left[ \exp(r_{c_3})(n_c - 1) + \frac{1}{\exp(r_{c_3})} \right]}{2 \exp(s_{c_3}) n_c^2} \sum_{i=1}^p w_{i3}^{(m)} \left[ a(\mathbf{x}_{ci}, \mu_{c_3})^T \mathbf{1} \right]^2\end{aligned}$$

### H.33 The first derivative of $\partial Q_3/\partial r_{n_3}$

$$\begin{aligned}\frac{\partial Q_3}{\partial r_{n_3}} = & \left[ \frac{n_n}{2} \frac{\exp(r_{n_3})}{1 + \exp(r_{n_3})} - \frac{1}{2} \right] \sum_{i=1}^p w_{i3}^{(m)} \\ & - \frac{1}{2 \exp[s_{n_3} + \exp(\Delta_{n_3})]} \frac{n_n - 1}{n_n} \exp(r_{n_3}) \sum_{i=1}^p w_{i3}^{(m)} [a(\mathbf{x}_{ni}, \mu_{n_3})]^T [a(\mathbf{x}_{ni}, \mu_{n_3})] \\ & + \frac{\left[ \exp(r_{n_3})(n_n - 1) + \frac{1}{\exp(r_{n_3})} \right]}{2 \exp[s_{n_3} + \exp(\Delta_{n_3})] n_n^2} \sum_{i=1}^p w_{i3}^{(m)} \left[ a(\mathbf{x}_{ni}, \mu_{n_3})^T \mathbf{1} \right]^2\end{aligned}$$

### H.34 The first derivative of $\partial Q_3 / \partial \mu_{c_3}$

$$\begin{aligned} \frac{\partial Q_3}{\partial \mu_{c_3}} = & -\frac{1}{\exp(s_{c_3})} \frac{n_c - 1}{n_c} [1 + \exp(r_{c_3})] \sum_{i=1}^p w_{i3}^{(m)} (n_c \mu_{c_3} - \mathbf{1}^T \mathbf{x}_c) \\ & + \frac{\left[ (n_c - 2) + \exp(r_{c_3})(n_c - 1) - \frac{1}{\exp(r_{c_3})} \right]}{\exp(s_{c_3}) n_c} \sum_{i=1}^p w_{i3}^{(m)} (n_c \mu_{c_3} - \mathbf{1}^T \mathbf{x}_c) \end{aligned}$$

### H.35 The first derivative of $\partial Q_3 / \partial \mu_{n_3}$

$$\begin{aligned} \frac{\partial Q_3}{\partial \mu_{n_3}} = & -\frac{1}{\exp[s_{c_3} + \exp(\Delta_{n_3})]} \frac{n_n - 1}{n_n} [1 + \exp(r_{n_3})] \sum_{i=1}^p w_{i3}^{(m)} (n_n \mu_{n_3} - \mathbf{1}^T \mathbf{x}_n) \\ & + \frac{\left[ (n_n - 2) + \exp(r_{n_3})(n_n - 1) - \frac{1}{\exp(r_{n_3})} \right]}{\exp[s_{c_3} + \exp(\Delta_{n_3})] n_n} \sum_{i=1}^p w_{i3}^{(m)} (n_n \mu_{n_3} - \mathbf{1}^T \mathbf{x}_n) \end{aligned}$$

## I Log-density function for the multivariate normal distribution with special mean vector and covariance matrix

Suppose a  $n \times 1$  random vector  $\mathbf{X}$  has multivariate normal distribution  $N(\boldsymbol{\mu}, \boldsymbol{\Sigma})$ , where

$$\boldsymbol{\mu} = \mu_0 \mathbf{1}_n, \quad \boldsymbol{\Sigma} = \sigma^2(1 - \rho) \mathbf{R}_0, \quad \mathbf{R}_0 = \mathbf{I}_n + \frac{\rho}{(1 - \rho)} \mathbf{1}_n \mathbf{1}_n^T. \quad (\text{A15})$$

The density function is

$$\begin{aligned} f(\mathbf{x}) &= (2\pi)^{-n/2} |\boldsymbol{\Sigma}|^{-1/2} \exp \left[ -\frac{(\mathbf{x} - \boldsymbol{\mu})^T \boldsymbol{\Sigma}^{-1} (\mathbf{x} - \boldsymbol{\mu})}{2} \right] \\ &= (2\pi)^{-n/2} |\sigma^2(1 - \rho) \mathbf{R}_0|^{-1/2} \exp \left[ -\frac{(\mathbf{x} - \mu_0 \mathbf{1}_n)^T \mathbf{R}_0^{-1} (\mathbf{x} - \mu_0 \mathbf{1}_n)}{2[\sigma^2(1 - \rho)]} \right] \\ &= [2\pi\sigma^2(1 - \rho)]^{-n/2} |\mathbf{R}_0|^{-1/2} \exp \left[ -\frac{(\mathbf{x} - \mu_0 \mathbf{1}_n)^T \mathbf{R}_0^{-1} (\mathbf{x} - \mu_0 \mathbf{1}_n)}{2[\sigma^2(1 - \rho)]} \right] \end{aligned} \quad (\text{A16})$$

The matrix cookbook<sup>1</sup> shows the following result:

$$(\mathbf{A} + \mathbf{BC})^{-1} = \mathbf{A}^{-1} - \mathbf{A}^{-1}\mathbf{B}[\mathbf{I} + \mathbf{CA}^{-1}\mathbf{B}]^{-1}\mathbf{CA}^{-1} \quad (\text{A17})$$

and

$$|\mathbf{I} + \mathbf{uv}^T| = 1 + \mathbf{u}^T\mathbf{v}. \quad (\text{A18})$$

Let

$$\mathbf{A} = \mathbf{I}_n, \mathbf{B} = \frac{\rho}{(1-\rho)}\mathbf{1}_n, \mathbf{C} = \mathbf{1}^T, \mathbf{u} = \frac{\rho}{(1-\rho)}\mathbf{1}_n, \mathbf{v} = \mathbf{1}_n.$$

We have

$$\begin{aligned} \mathbf{R}_0^{-1} &= \left[ \mathbf{I}_n + \frac{\rho}{(1-\rho)}\mathbf{1}_n\mathbf{1}_n^T \right]^{-1} = \mathbf{I}_n - \frac{\rho}{[1 + (n-1)\rho]}\mathbf{1}_n\mathbf{1}_n^T \\ |\mathbf{R}_0| &= 1 + \frac{\rho}{(1-\rho)}\mathbf{1}_n^T\mathbf{1}_n = \frac{[1 + (n-1)\rho]}{(1-\rho)}. \end{aligned} \quad (\text{A19})$$

Denote

$$\mathbf{a}(\mathbf{x}, \mu_0) = (\mathbf{x} - \mu_0\mathbf{1}_n). \quad (\text{A20})$$

Therefore the density function can be simplified into

$$\begin{aligned} f(\mathbf{x}) &= [2\pi\sigma^2]^{-n/2} \{ (1-\rho)^{n-1} [1 + (n-1)\rho] \}^{-1/2} \\ &\cdot \exp \left[ -\frac{[\mathbf{a}(\mathbf{x}, \mu_0)]^T [\mathbf{a}(\mathbf{x}, \mu_0)] - \frac{\rho}{[1+(n-1)\rho]} [\mathbf{a}(\mathbf{x}, \mu_0)^T \mathbf{1}_n]^2}{2[\sigma^2(1-\rho)]} \right] \end{aligned} \quad (\text{A21})$$

Log-density function is

$$\begin{aligned} \log[f(\mathbf{x})] &= -\frac{n}{2} \log(2\pi) - \frac{n}{2} \log(\sigma^2) - \frac{1}{2} \{ (n-1) \log[(1-\rho)] + \log[1 + (n-1)\rho] \} \\ &\quad - \frac{[\mathbf{a}(\mathbf{x}, \mu_0)]^T [\mathbf{a}(\mathbf{x}, \mu_0)] - \frac{\rho}{[1+(n-1)\rho]} [\mathbf{a}(\mathbf{x}, \mu_0)^T \mathbf{1}_n]^2}{2[\sigma^2(1-\rho)]}. \end{aligned} \quad (\text{A22})$$

## References

---

<sup>1</sup><http://matrixcookbook.com/>
