# Supplementary material for: Detecting Differentially Variable MicroRNAs via Model-Based Clustering
Source: Hindawi journal article supplement (doi:10.1155/2018/6591634), 2018-07-12

**hsa-miR-1826  
(GSE67138)**

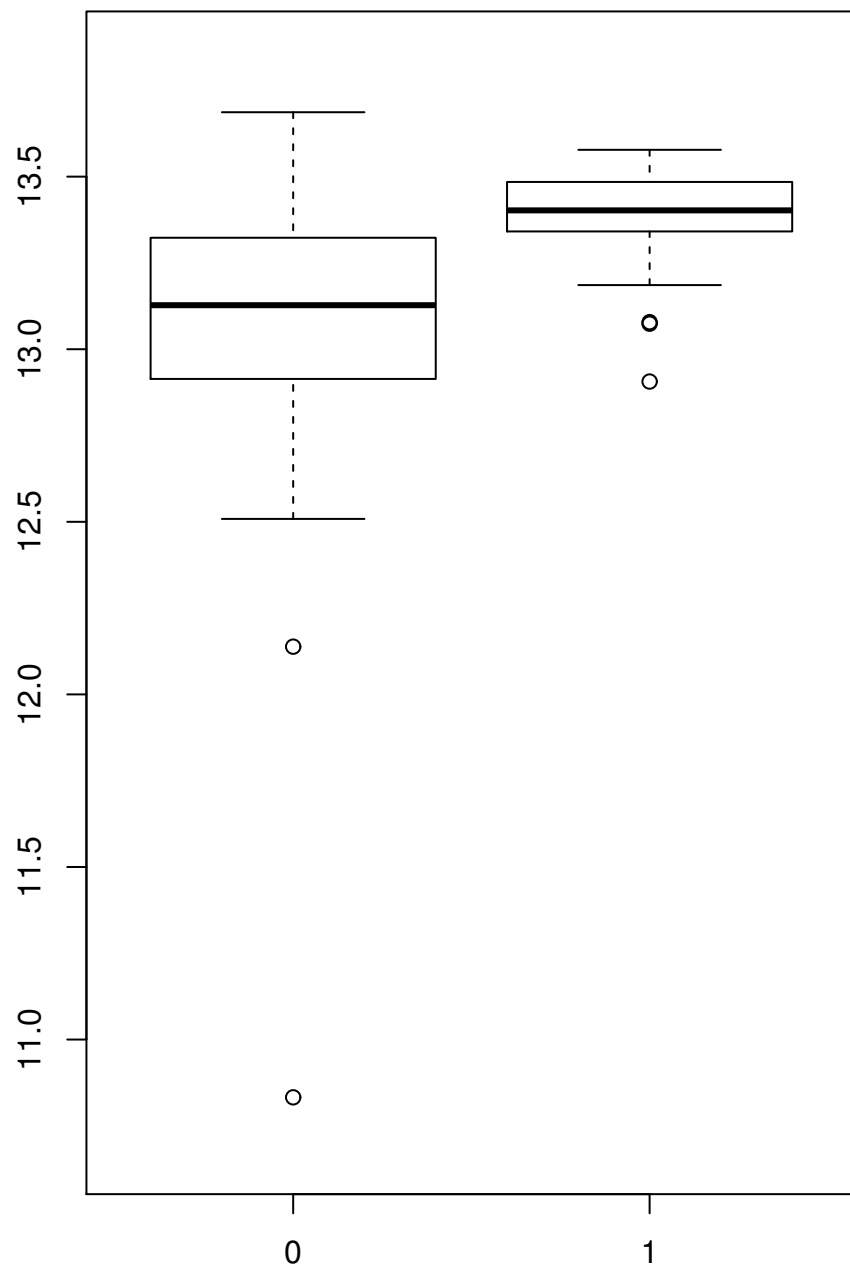

**hsa-miR-1826  
(GSE67139)**

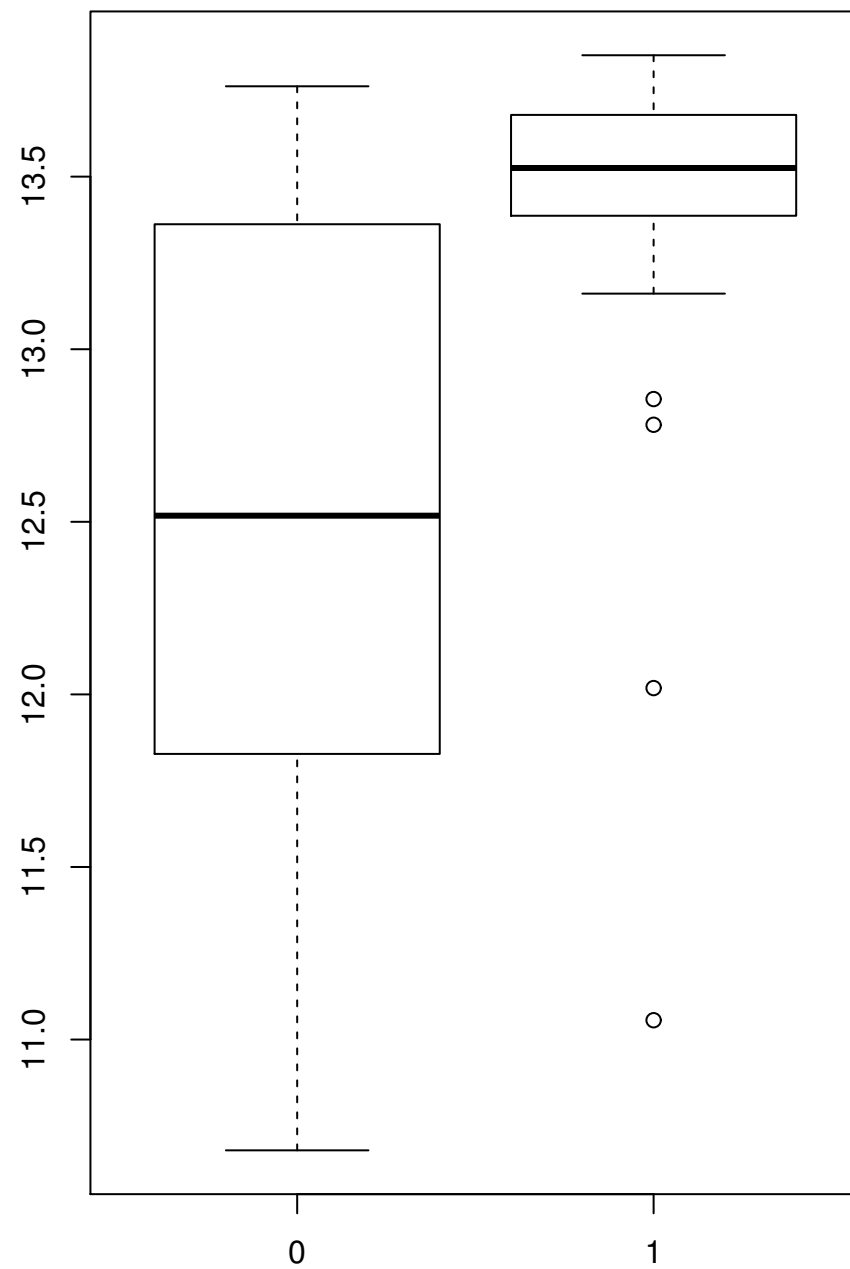

**hsa-miR-191**  
**(GSE67138)**

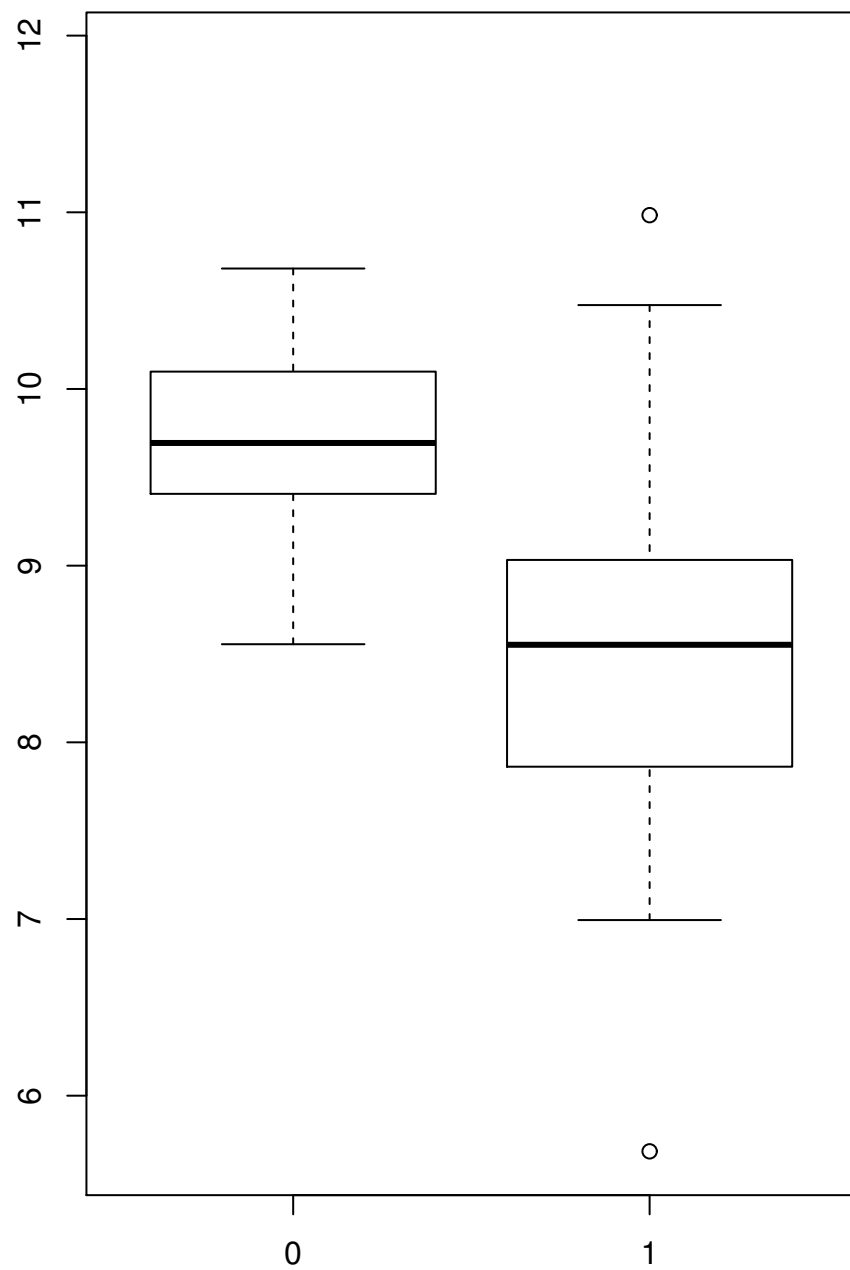

**hsa-miR-191**  
**(GSE67139)**

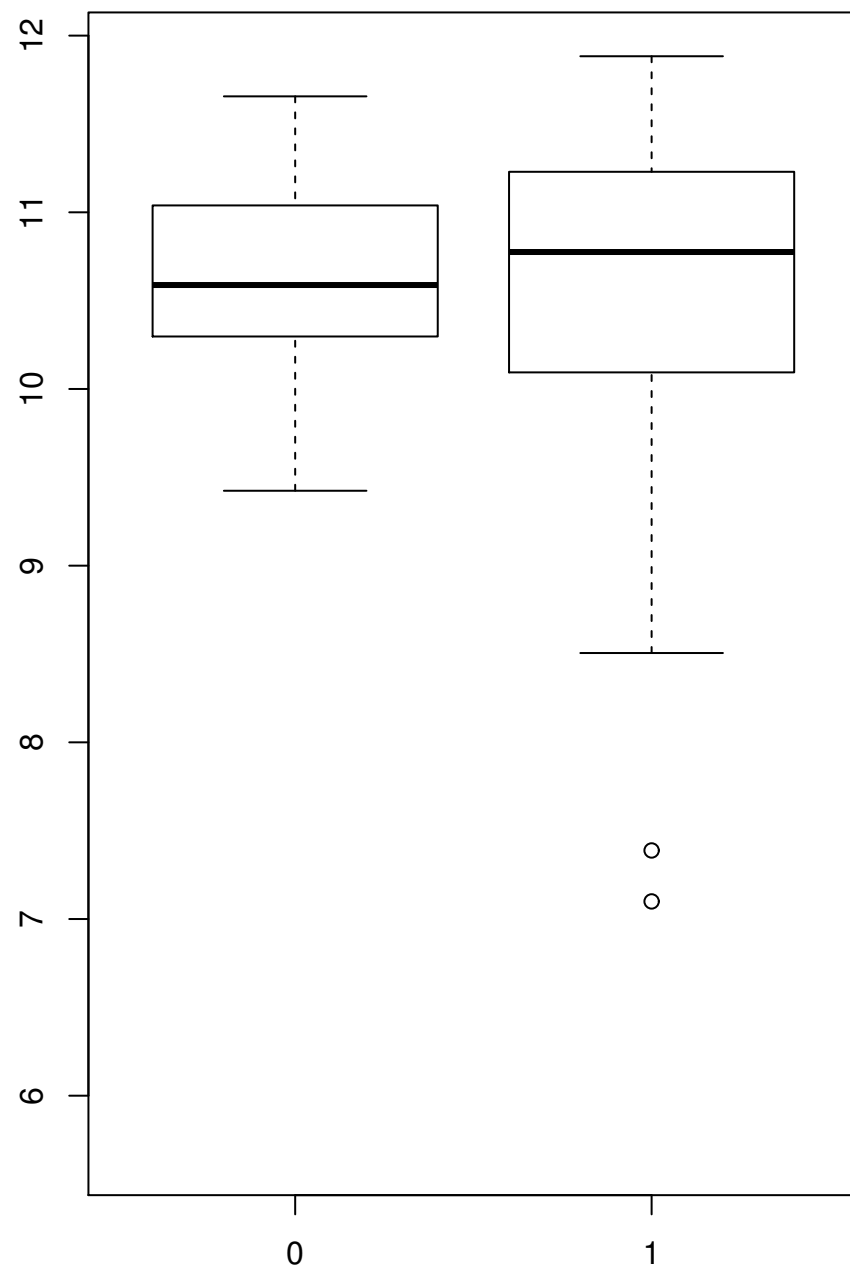

**hsa-miR-194-star**  
**(GSE67138)**

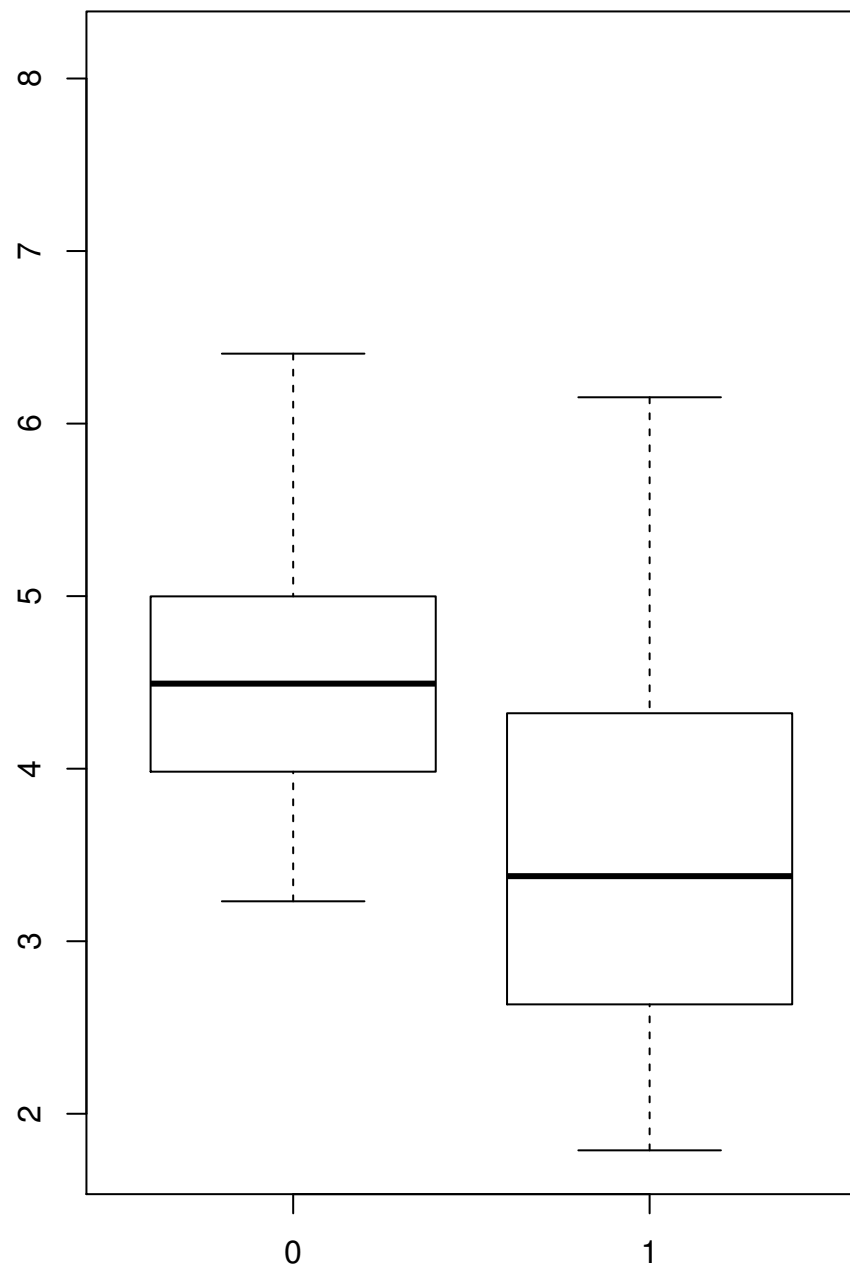

**hsa-miR-194-star**  
**(GSE67139)**

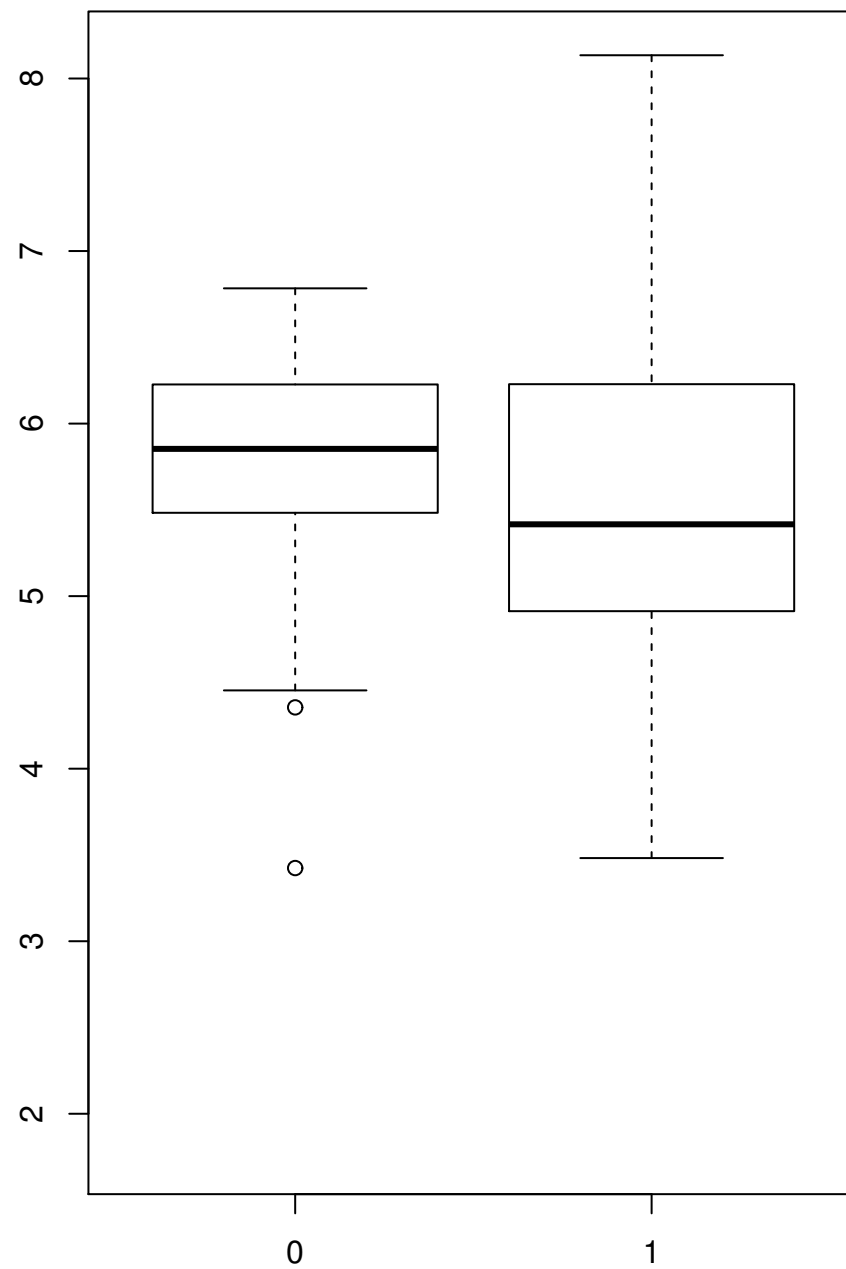

**hsa-miR-222  
(GSE67138)**

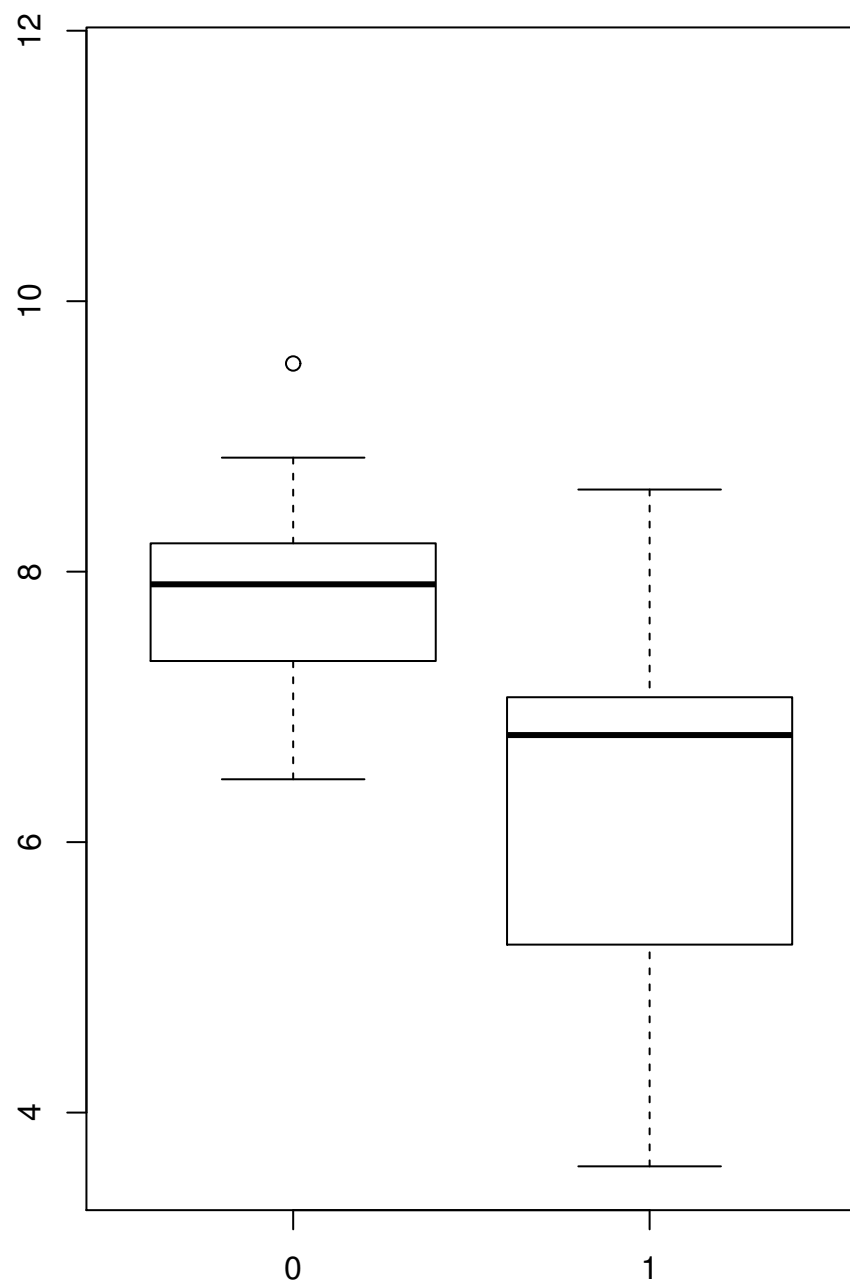

**hsa-miR-222  
(GSE67139)**

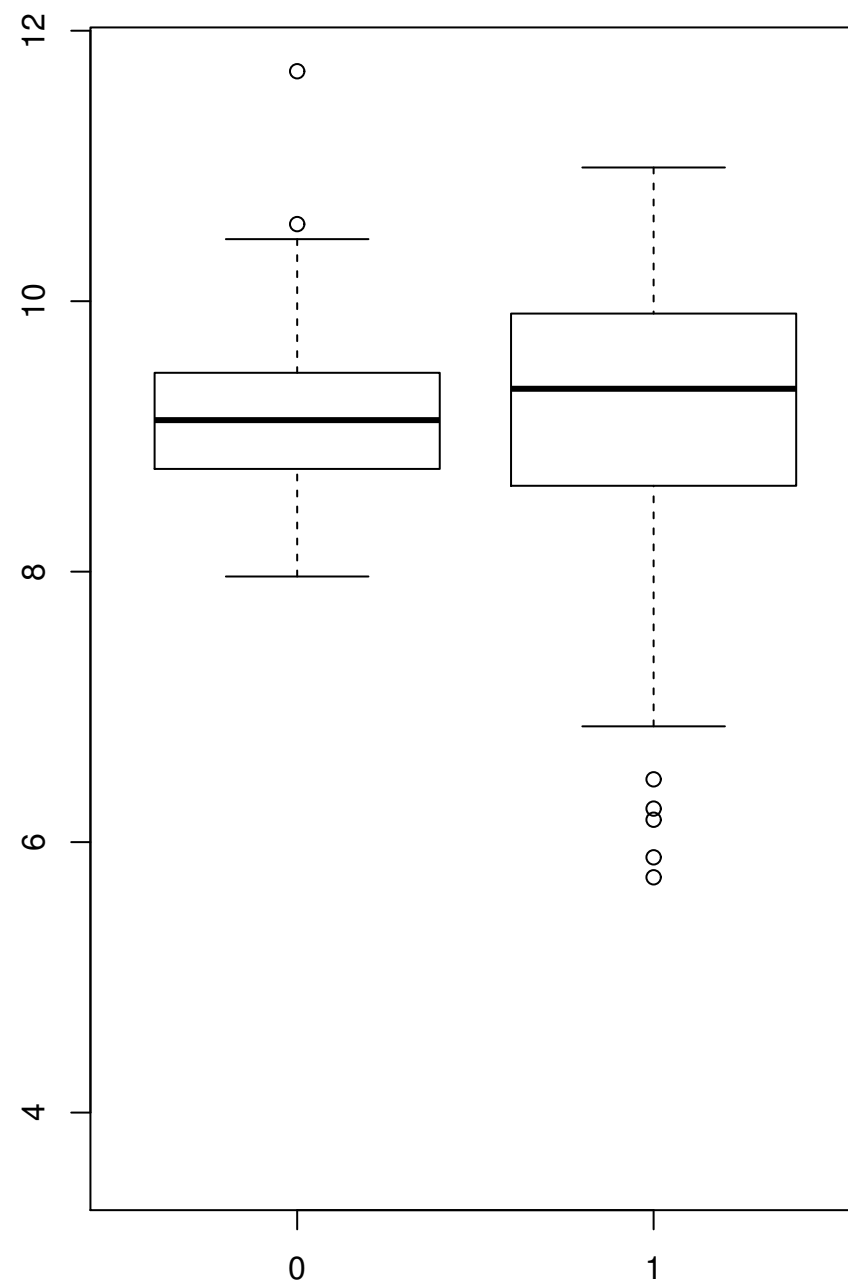

**hsa-miR-502-3p  
(GSE67138)**

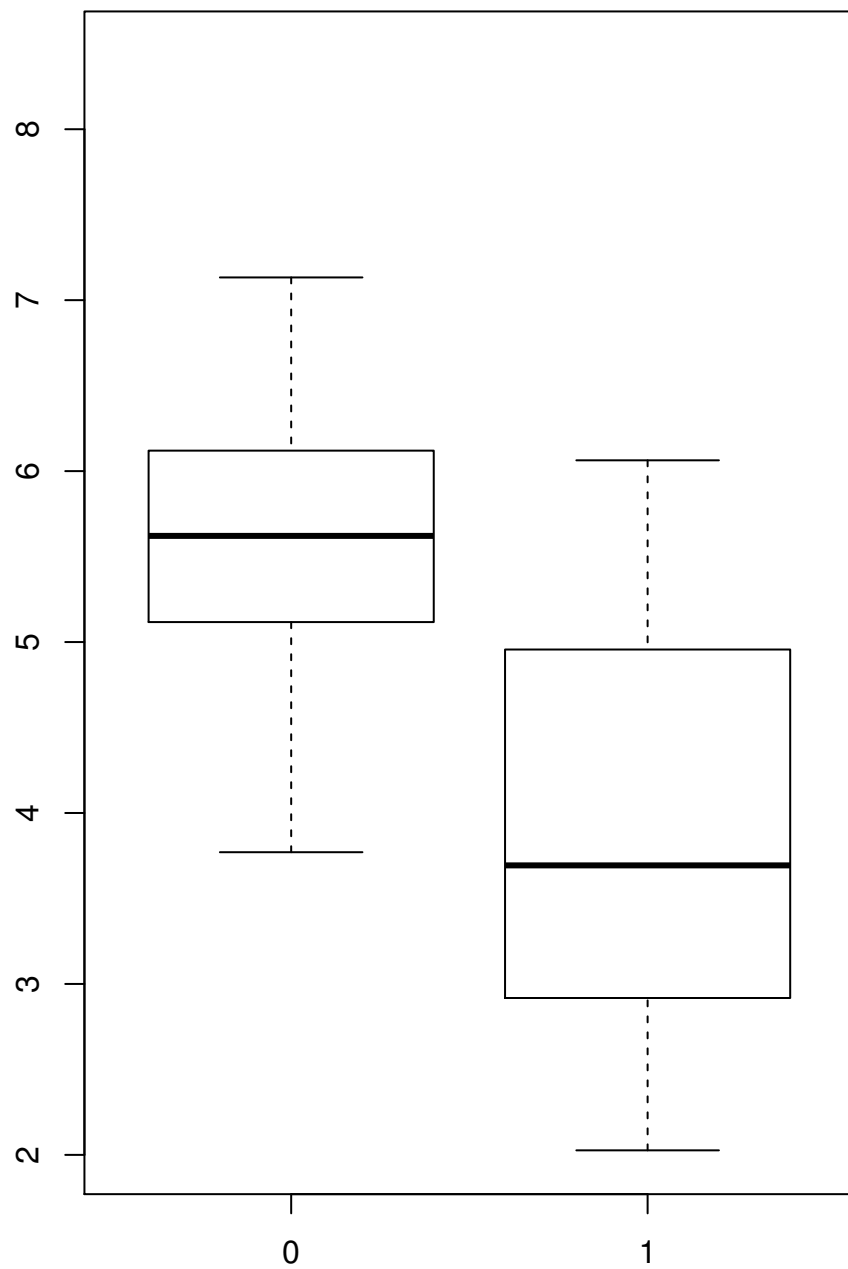

**hsa-miR-502-3p  
(GSE67139)**

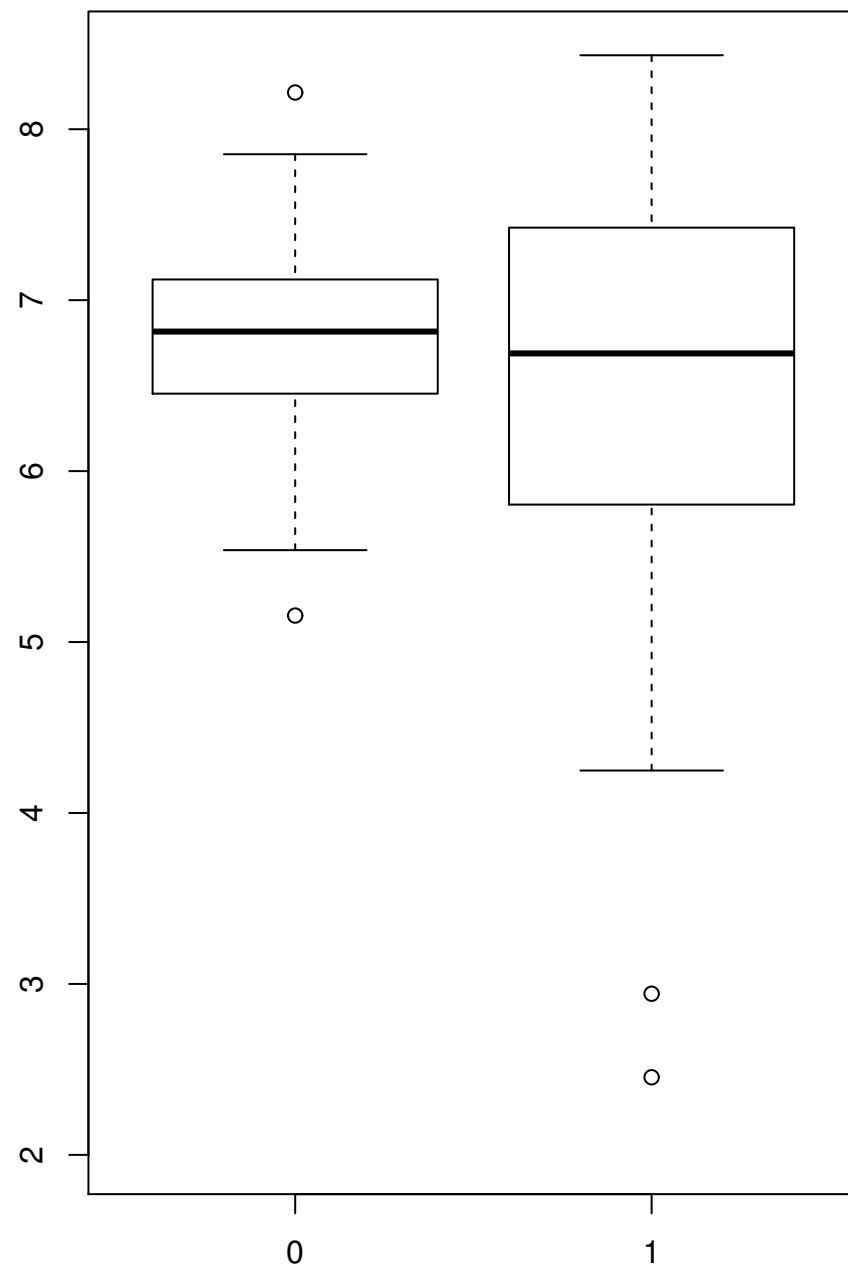

**hsa-miR-93  
(GSE67138)**

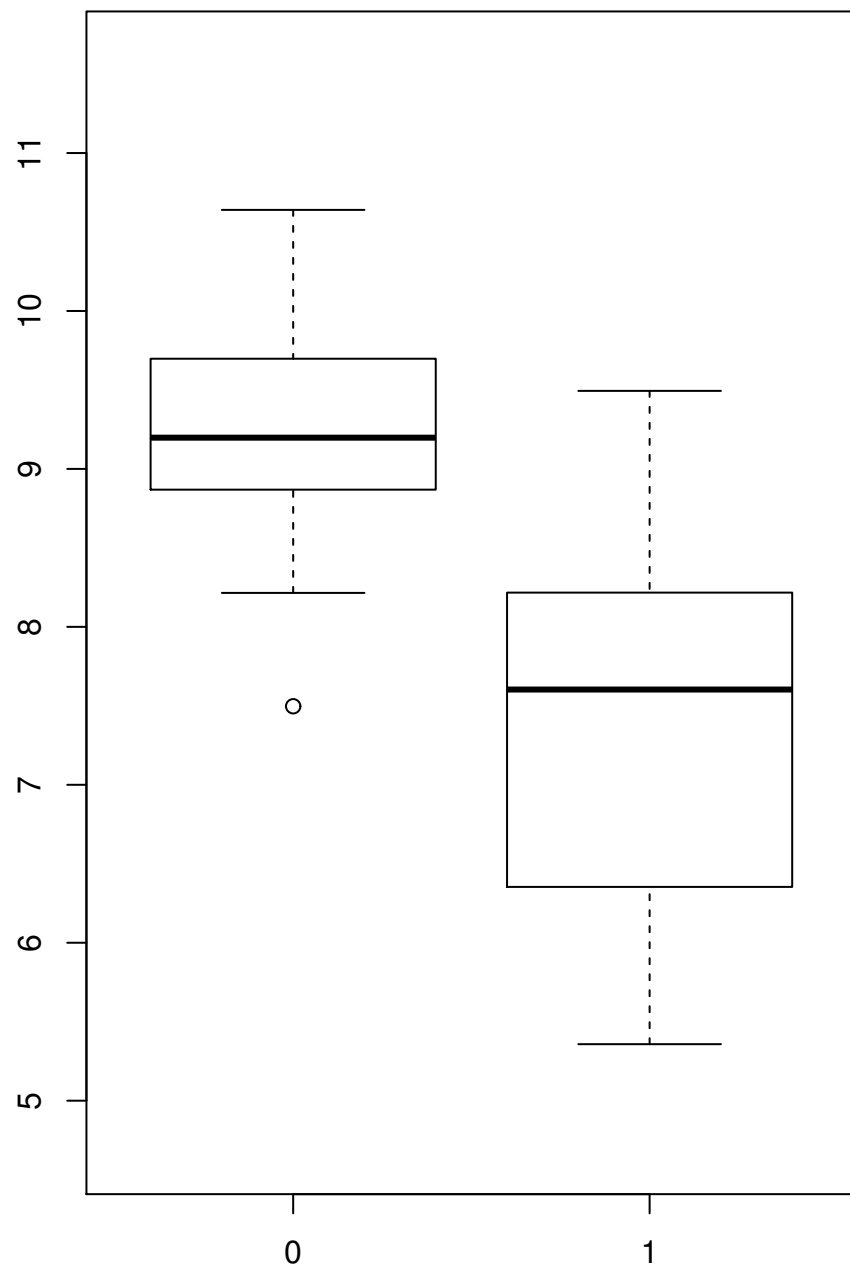

**hsa-miR-93  
(GSE67139)**

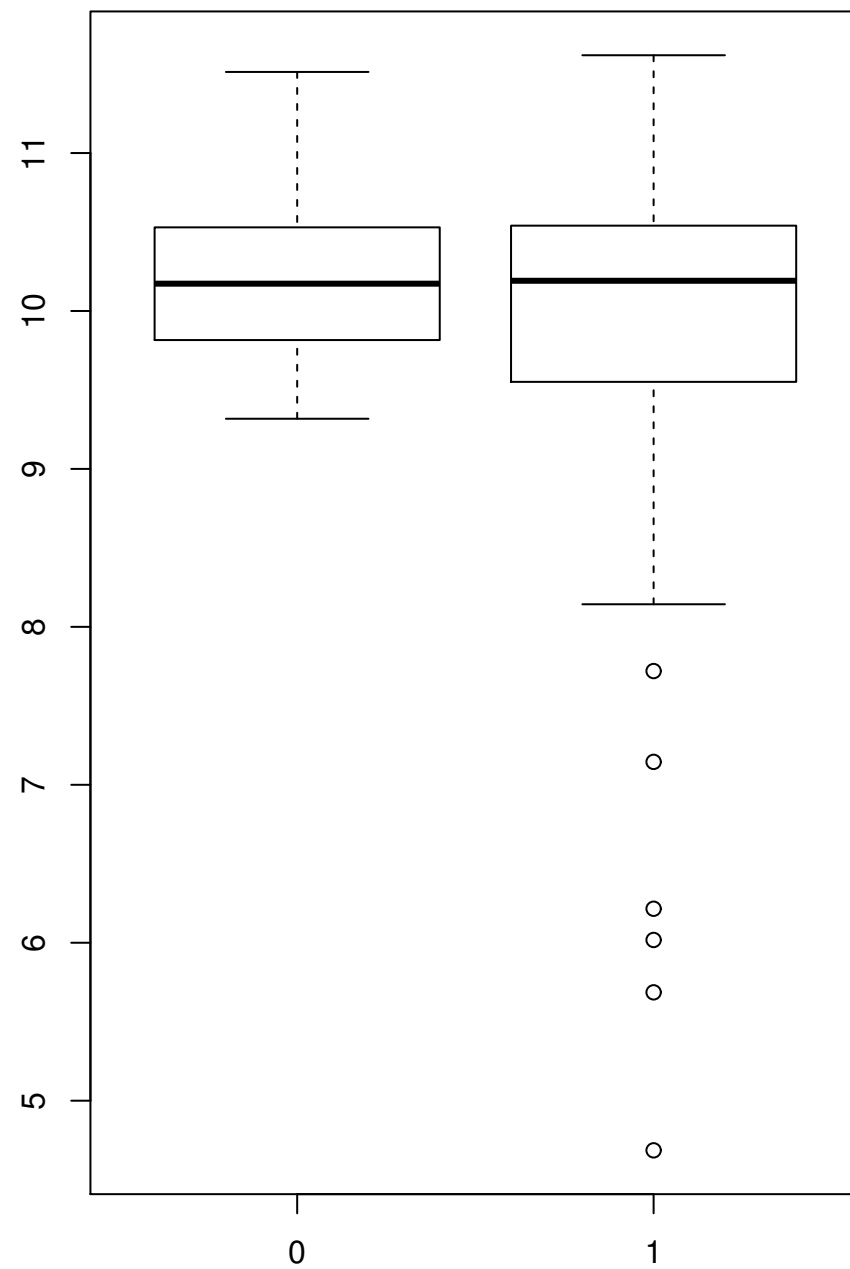

**hsa-miR-99b  
(GSE67138)**

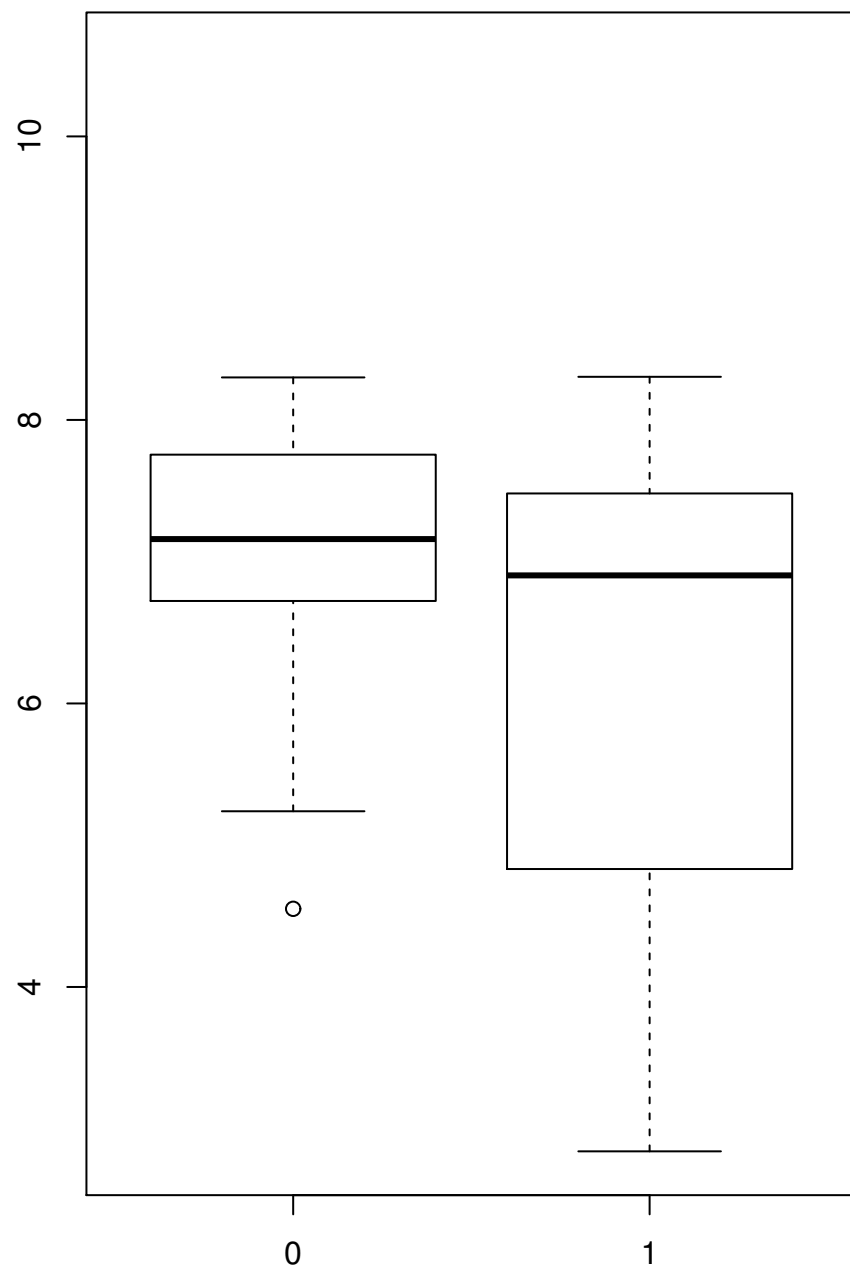

**hsa-miR-99b  
(GSE67139)**

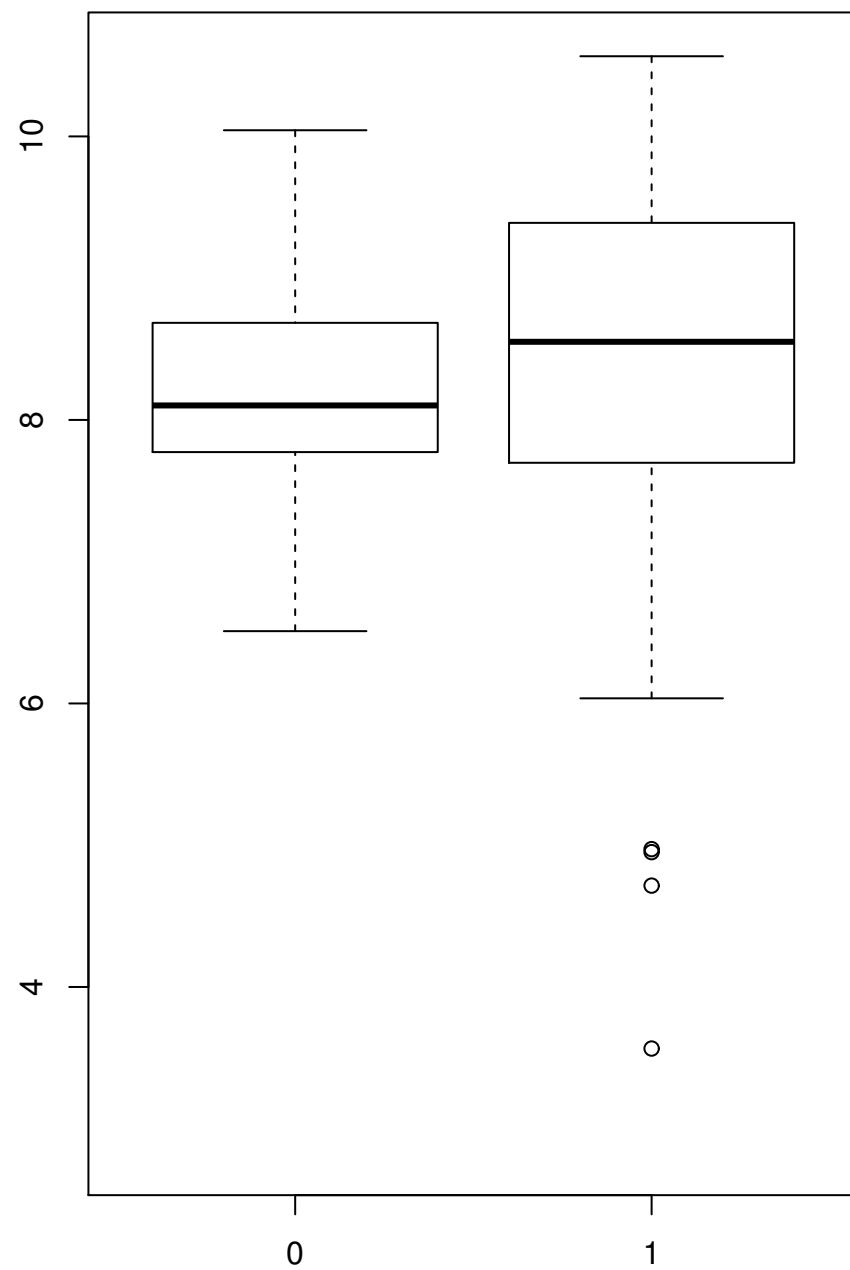

Supplement: f1 [file 6591634.f1.zip]
