# Supplementary material for: Detecting Differentially Variable MicroRNAs via Model-Based Clustering
Source: Int J Genomics. 2018 Jul 12;2018:6591634. doi: 10.1155/2018/6591634 (PMC6079429; doi:10.1155/2018/6591634)
Supplement: Supplementary Materials — Details about the gs model and its parameter estimation via the EM algorithm. Supplemental Table A1: the list of the 157 DE-only miRNAs. Supplemental Table A2: the list of the 60 DV-and-DE miRNAs. Supplemental Table A3: the list of the 1639 genes targeted by the 7 miRNAs in S DVonly. Supplemental Table A4: the list of the 8141 genes targeted by the 157 miRNAs in S DEonly. Supplemental Table A5: the list of the 6893 genes targeted by the 60 miRNAs in S both. Supplemental Table A6: the list of the 6 KEGG pathways enriched by the 1639 genes targeted by the 7 miRNAs in S DVonly. Supplemental Table A7: the list of the 1 KEGG pathway enriched by the 8141 genes targeted by the 157 miRNAs in S DEonly. Supplemental Table A8: the list of the 2 KEGG pathways enriched by the 6893 genes targeted by the 60 miRNAs in S both. Supplemental Table A9: p values of two-sided Wilcoxon signed rank tests to test if the median Jaccard index obtained by the gs method is the same as that obtained by each of the other 16 methods. Supplemental Table A10: p values of two-sided Wilcoxon signed rank tests to test if the median FPR obtained by the gs method is the same as that obtained by each of the other 16 methods. Supplemental Table A11: p values of two-sided Wilcoxon signed rank tests to test if the median FNR obtained by the gs method is the same as that obtained by each of the other 16 methods. Supplemental Table A12: p values of two-sided Wilcoxon signed rank tests to test if the median proportion of validation obtained by the gs method is the same as that obtained by each of the other 16 methods based on 100 bootstrap samples. Figure A1: the plot of percentiles of log2 expression levels across arrays. Left panel: GSE67138. Right panel: GSE67139. Figure A2: the plot of the first and second principal components. Left panel: GSE67138. Right panel: GSE67139. Supplemental Figure A3: parallel boxplots of the 7 validated DV-only miRNAs. Left panel: GSE67138. Right panel: GSE67139. Supplemental Fi [file 6591634.f1.zip › TableA1_IJG_2364381.csv]

hsa-let-7d-star
hsa-let-7e
hsa-let-7f-1-star
hsa-miR-10a
hsa-miR-10b
hsa-miR-1180
hsa-miR-1183
hsa-miR-1201
hsa-miR-1207-5p
hsa-miR-1249
hsa-miR-125a-5p
hsa-miR-125b-2-star
hsa-miR-1268
hsa-miR-1279
hsa-miR-128
hsa-miR-129-3p
hsa-miR-1293
hsa-miR-1298
hsa-miR-130a
hsa-miR-1321
hsa-miR-1323
hsa-miR-132
hsa-miR-134
hsa-miR-135a-star
hsa-miR-138
hsa-miR-139-3p
hsa-miR-139-5p
hsa-miR-140-5p
hsa-miR-143-star
hsa-miR-146a
hsa-miR-146b-3p
hsa-miR-146b-5p
hsa-miR-148a
hsa-miR-148b
hsa-miR-149-star
hsa-miR-152
hsa-miR-15a
hsa-miR-16
hsa-miR-17-star
hsa-miR-181a-2-star
hsa-miR-181c
hsa-miR-1825
hsa-miR-1827
hsa-miR-182
hsa-miR-184
hsa-miR-187-star
hsa-miR-18a
hsa-miR-18b
hsa-miR-192-star
hsa-miR-193a-3p
hsa-miR-196a-star
hsa-miR-197
hsa-miR-198
hsa-miR-199a-5p
hsa-miR-199b-3p
hsa-miR-19b
hsa-miR-200a
hsa-miR-200b
hsa-miR-200c
hsa-miR-203
hsa-miR-20b
hsa-miR-21-star
hsa-miR-210
hsa-miR-214-star
hsa-miR-214
hsa-miR-217
hsa-miR-21
hsa-miR-224
hsa-miR-23b
hsa-miR-24-2-star
hsa-miR-25-star
hsa-miR-26b
hsa-miR-27b-star
hsa-miR-28-5p
hsa-miR-296-3p
hsa-miR-297
hsa-miR-29b-1-star
hsa-miR-29b
hsa-miR-29c-star
hsa-miR-29c
hsa-miR-302e
hsa-miR-30a-star
hsa-miR-30c-1-star
hsa-miR-30e
hsa-miR-320d
hsa-miR-32
hsa-miR-330-3p
hsa-miR-331-5p
hsa-miR-337-5p
hsa-miR-339-3p
hsa-miR-33b
hsa-miR-342-5p
hsa-miR-34a-star
hsa-miR-365
hsa-miR-367-star
hsa-miR-371-5p
hsa-miR-374a-star
hsa-miR-379
hsa-miR-382
hsa-miR-409-3p
hsa-miR-421
hsa-miR-431-star
hsa-miR-451
hsa-miR-453
hsa-miR-455-5p
hsa-miR-483-5p
hsa-miR-488
hsa-miR-489
hsa-miR-493
hsa-miR-494
hsa-miR-497
hsa-miR-500
hsa-miR-501-3p
hsa-miR-503
hsa-miR-505-star
hsa-miR-505
hsa-miR-508-3p
hsa-miR-508-5p
hsa-miR-509-3-5p
hsa-miR-513a-5p
hsa-miR-518d-5p
hsa-miR-519b-3p
hsa-miR-542-5p
hsa-miR-548b-3p
hsa-miR-548o
hsa-miR-570
hsa-miR-584
hsa-miR-603
hsa-miR-621
hsa-miR-623
hsa-miR-625
hsa-miR-626
hsa-miR-629
hsa-miR-635
hsa-miR-639
hsa-miR-654-5p
hsa-miR-660
hsa-miR-663
hsa-miR-663b
hsa-miR-664-star
hsa-miR-671-3p
hsa-miR-708
hsa-miR-744
hsa-miR-765
hsa-miR-768-5p
hsa-miR-769-5p
hsa-miR-873
hsa-miR-874
hsa-miR-877
hsa-miR-921
hsa-miR-92a-1-star
hsa-miR-92a-2-star
hsa-miR-92b-star
hsa-miR-93-star
hsa-miR-938
hsa-miR-940
hsa-miR-98
