# Supplementary material for: Detecting Differentially Variable MicroRNAs via Model-Based Clustering
Source: Int J Genomics. 2018 Jul 12;2018:6591634. doi: 10.1155/2018/6591634 (PMC6079429; doi:10.1155/2018/6591634)
Supplement: Supplementary Materials — Details about the gs model and its parameter estimation via the EM algorithm. Supplemental Table A1: the list of the 157 DE-only miRNAs. Supplemental Table A2: the list of the 60 DV-and-DE miRNAs. Supplemental Table A3: the list of the 1639 genes targeted by the 7 miRNAs in S DVonly. Supplemental Table A4: the list of the 8141 genes targeted by the 157 miRNAs in S DEonly. Supplemental Table A5: the list of the 6893 genes targeted by the 60 miRNAs in S both. Supplemental Table A6: the list of the 6 KEGG pathways enriched by the 1639 genes targeted by the 7 miRNAs in S DVonly. Supplemental Table A7: the list of the 1 KEGG pathway enriched by the 8141 genes targeted by the 157 miRNAs in S DEonly. Supplemental Table A8: the list of the 2 KEGG pathways enriched by the 6893 genes targeted by the 60 miRNAs in S both. Supplemental Table A9: p values of two-sided Wilcoxon signed rank tests to test if the median Jaccard index obtained by the gs method is the same as that obtained by each of the other 16 methods. Supplemental Table A10: p values of two-sided Wilcoxon signed rank tests to test if the median FPR obtained by the gs method is the same as that obtained by each of the other 16 methods. Supplemental Table A11: p values of two-sided Wilcoxon signed rank tests to test if the median FNR obtained by the gs method is the same as that obtained by each of the other 16 methods. Supplemental Table A12: p values of two-sided Wilcoxon signed rank tests to test if the median proportion of validation obtained by the gs method is the same as that obtained by each of the other 16 methods based on 100 bootstrap samples. Figure A1: the plot of percentiles of log2 expression levels across arrays. Left panel: GSE67138. Right panel: GSE67139. Figure A2: the plot of the first and second principal components. Left panel: GSE67138. Right panel: GSE67139. Supplemental Figure A3: parallel boxplots of the 7 validated DV-only miRNAs. Left panel: GSE67138. Right panel: GSE67139. Supplemental Fi [file 6591634.f1.zip › TableA2_IJG_2364382.csv]

hsa-let-7f
hsa-let-7g
hsa-let-7i
hsa-miR-100
hsa-miR-106a
hsa-miR-106b
hsa-miR-1202
hsa-miR-1224-5p
hsa-miR-1225-5p
hsa-miR-1228
hsa-miR-122
hsa-miR-1234
hsa-miR-125b
hsa-miR-126
hsa-miR-1275
hsa-miR-1281
hsa-miR-1307
hsa-miR-138-1-star
hsa-miR-143
hsa-miR-150-star
hsa-miR-150
hsa-miR-151-3p
hsa-miR-151-5p
hsa-miR-155
hsa-miR-17
hsa-miR-181b
hsa-miR-185
hsa-miR-192
hsa-miR-194
hsa-miR-195
hsa-miR-199a-3p
hsa-miR-20a
hsa-miR-221
hsa-miR-22
hsa-miR-23a
hsa-miR-24
hsa-miR-25
hsa-miR-26a
hsa-miR-27a
hsa-miR-27b
hsa-miR-28-3p
hsa-miR-29a
hsa-miR-30a
hsa-miR-30b
hsa-miR-30c
hsa-miR-30d
hsa-miR-34a
hsa-miR-361-5p
hsa-miR-362-5p
hsa-miR-425
hsa-miR-500-star
hsa-miR-532-5p
hsa-miR-572
hsa-miR-575
hsa-miR-595
hsa-miR-652
hsa-miR-671-5p
hsa-miR-936
hsa-miR-939
hsa-miR-99a
