# Supplementary material for: Detecting Differentially Variable MicroRNAs via Model-Based Clustering
Source: Int J Genomics. 2018 Jul 12;2018:6591634. doi: 10.1155/2018/6591634 (PMC6079429; doi:10.1155/2018/6591634)
Supplement: Supplementary Materials — Details about the gs model and its parameter estimation via the EM algorithm. Supplemental Table A1: the list of the 157 DE-only miRNAs. Supplemental Table A2: the list of the 60 DV-and-DE miRNAs. Supplemental Table A3: the list of the 1639 genes targeted by the 7 miRNAs in S DVonly. Supplemental Table A4: the list of the 8141 genes targeted by the 157 miRNAs in S DEonly. Supplemental Table A5: the list of the 6893 genes targeted by the 60 miRNAs in S both. Supplemental Table A6: the list of the 6 KEGG pathways enriched by the 1639 genes targeted by the 7 miRNAs in S DVonly. Supplemental Table A7: the list of the 1 KEGG pathway enriched by the 8141 genes targeted by the 157 miRNAs in S DEonly. Supplemental Table A8: the list of the 2 KEGG pathways enriched by the 6893 genes targeted by the 60 miRNAs in S both. Supplemental Table A9: p values of two-sided Wilcoxon signed rank tests to test if the median Jaccard index obtained by the gs method is the same as that obtained by each of the other 16 methods. Supplemental Table A10: p values of two-sided Wilcoxon signed rank tests to test if the median FPR obtained by the gs method is the same as that obtained by each of the other 16 methods. Supplemental Table A11: p values of two-sided Wilcoxon signed rank tests to test if the median FNR obtained by the gs method is the same as that obtained by each of the other 16 methods. Supplemental Table A12: p values of two-sided Wilcoxon signed rank tests to test if the median proportion of validation obtained by the gs method is the same as that obtained by each of the other 16 methods based on 100 bootstrap samples. Figure A1: the plot of percentiles of log2 expression levels across arrays. Left panel: GSE67138. Right panel: GSE67139. Figure A2: the plot of the first and second principal components. Left panel: GSE67138. Right panel: GSE67139. Supplemental Figure A3: parallel boxplots of the 7 validated DV-only miRNAs. Left panel: GSE67138. Right panel: GSE67139. Supplemental Fi [file 6591634.f1.zip › TableA3_IJG_2364383.csv]

TARGET_GENE	GENE_DESCRIPTION	KEGG	OBSERVED_MIRNA	OE
SSSCA1	Sjogren syndrome/scleroderma autoantigen 1	0	1	47.3334
CORO1A	coronin, actin binding protein, 1A	1	1	28.4
NDUFA1	NADH dehydrogenase (ubiquinone) 1 alpha subcomplex, 1, 7.5kDa	5	1	12.9091
NSMCE4A	non-SMC element 4 homolog A (S. cerevisiae)	0	1	10.9231
RLBP1L2		0	1	8.875
ANKRD9	ankyrin repeat domain 9	0	1	7.1
SAFB	scaffold attachment factor B	0	1	6.7619
UBC	ubiquitin C	1	1	6.17391
KIAA0922	KIAA0922	0	1	5.25925
KIAA1787		0	1	5.07143
KPNA2	karyopherin alpha 2 (RAG cohort 1, importin alpha 1)	0	2	5.07143
LIN7B	lin-7 homolog B (C. elegans)	0	1	4.89655
TUBA1A	tubulin, alpha 1a	3	1	4.89655
PPP3CC	protein phosphatase 3, catalytic subunit, gamma isozyme	13	1	4.58064
PSMD11	proteasome (prosome, macropain) 26S subunit, non-ATPase, 11	1	1	4.58064
SMARCA5	SWI/SNF related, matrix associated, actin dependent regulator of chromatin, subfamily a, member 5	0	1	4.58064
PLCD1	phospholipase C, delta 1	4	1	4.4375
FGF4	fibroblast growth factor 4	4	1	4.30303
PKMYT1	protein kinase, membrane associated tyrosine/threonine 1	3	1	4.05714
SORL1	sortilin-related receptor, L(DLR class) A repeats containing	0	1	3.94445
PPP2R2A	protein phosphatase 2, regulatory subunit B, alpha	3	2	3.83785
BBX	bobby sox homolog (Drosophila)	0	1	3.73684
NAGK	N-acetylglucosamine kinase	1	1	3.73684
CPNE1	copine I	0	1	3.64102
PLAC1	placenta-specific 1	0	1	3.55
MASTL	microtubule associated serine/threonine kinase-like	0	1	3.46341
SEMA4B	sema domain, immunoglobulin domain (Ig), transmembrane domain (TM) and short cytoplasmic domain, (semaphorin) 4B	1	1	3.46341
ZDHHC1	zinc finger, DHHC-type containing 1	0	1	3.46341
SOD2	superoxide dismutase 2, mitochondrial	2	1	3.38095
CYR61	cysteine-rich, angiogenic inducer, 61	0	1	3.30232
TRIP11	thyroid hormone receptor interactor 11	0	1	3.30232
NTF3	neurotrophin 3	2	1	3.22727
COX8C	cytochrome c oxidase subunit VIIIC	6	1	3.15555
MAP3K10	mitogen-activated protein kinase kinase kinase 10	1	1	3.15555
CHD8	chromodomain helicase DNA binding protein 8	1	1	3.08696
PLD3	phospholipase D family, member 3	0	1	3.08696
NEFH	neurofilament, heavy polypeptide	1	2	3.02129
BCHE	butyrylcholinesterase	0	1	3.02128
SCAMP2	secretory carrier membrane protein 2	0	1	3.02128
ATP1A1	ATPase, Na+/K+ transporting, alpha 1 polypeptide	8	1	2.95833
SMARCA4	SWI/SNF related, matrix associated, actin dependent regulator of chromatin, subfamily a, member 4	0	1	2.95833
STK11IP	serine/threonine kinase 11 interacting protein	0	1	2.95833
MORF4L1	mortality factor 4 like 1	0	2	2.92783
CCL1	chemokine (C-C motif) ligand 1	2	1	2.89796
FOXL2	forkhead box L2	0	1	2.89796
HERC1	HECT and RLD domain containing E3 ubiquitin protein ligase family member 1	1	1	2.89796
TGFB1I1	transforming growth factor beta 1 induced transcript 1	0	1	2.89796
ANKHD1	ankyrin repeat and KH domain containing 1	0	1	2.84
CHAF1A	chromatin assembly factor 1, subunit A (p150)	0	1	2.84
GOLSYN		0	2	2.78431
MLL4		0	1	2.67924
BSCL2	Berardinelli-Seip congenital lipodystrophy 2 (seipin)	0	1	2.62963
HSPA8	heat shock 70kDa protein 8	6	1	2.62963
SLC40A1	solute carrier family 40 (iron-regulated transporter), member 1	0	2	2.62962
CABYR	calcium binding tyrosine-(Y)-phosphorylation regulated	0	1	2.58182
ITFG1	integrin alpha FG-GAP repeat containing 1	0	1	2.58182
MYF5	myogenic factor 5	0	1	2.58182
STK11	serine/threonine kinase 11	2	1	2.58182
RHOC	ras homolog family member C	0	1	2.53572
DSG4	desmoglein 4	0	1	2.49123
TSG101	tumor susceptibility 101	1	1	2.49123
BTG3	BTG family, member 3	0	1	2.44828
PPP6C	protein phosphatase 6, catalytic subunit	0	2	2.42735
ANXA1	annexin A1	0	1	2.40678
CCDC50	coiled-coil domain containing 50	0	1	2.40678
PDZRN4	PDZ domain containing ring finger 4	0	1	2.40678
RAI2	retinoic acid induced 2	0	1	2.40678
SLC35F3	solute carrier family 35, member F3	0	2	2.40678
ZNF367	zinc finger protein 367	0	1	2.40678
ZNF791	zinc finger protein 791	0	1	2.40678
MAP3K12	mitogen-activated protein kinase kinase kinase 12	1	2	2.38655
MMP1	matrix metallopeptidase 1 (interstitial collagenase)	3	1	2.36667
TRIP10	thyroid hormone receptor interactor 10	1	1	2.36667
EMX2	empty spiracles homeobox 2	0	2	2.32787
FOS	FBJ murine osteosarcoma viral oncogene homolog	8	2	2.32787
ZNF597	zinc finger protein 597	0	1	2.32787
MYNN	myoneurin	0	3	2.31522
ATL3	atlastin GTPase 3	0	1	2.29032
CEBPB	CCAAT/enhancer binding protein (C/EBP), beta	0	1	2.29032
SNCB	synuclein, beta	0	1	2.29032
TNKS1BP1	tankyrase 1 binding protein 1, 182kDa	0	1	2.29032
MMP3	matrix metallopeptidase 3 (stromelysin 1, progelatinase)	0	1	2.25397
TFG	TRK-fused gene	2	1	2.25397
TRPV6	transient receptor potential cation channel, subfamily V, member 6	1	1	2.25397
DRD1	dopamine receptor D1	3	2	2.23622
DDX5	DEAD (Asp-Glu-Ala-Asp) box helicase 5	1	1	2.21875
C6	complement component 6	3	1	2.18462
GAP43	growth associated protein 43	0	1	2.15152
HARS	histidyl-tRNA synthetase	1	1	2.15152
IRX5	iroquois homeobox 5	0	1	2.15152
KBTBD8	kelch repeat and BTB (POZ) domain containing 8	0	4	2.1194
LAPTM4A	lysosomal protein transmembrane 4 alpha	1	1	2.1194
PSD	pleckstrin and Sec7 domain containing	1	1	2.1194
RUNDC3A	RUN domain containing 3A	0	1	2.1194
TBC1D10C	TBC1 domain family, member 10C	0	1	2.1194
UBE2E3	ubiquitin-conjugating enzyme E2E 3	2	1	2.1194
INSM1	insulinoma-associated 1	0	2	2.08824
PDE3B	phosphodiesterase 3B, cGMP-inhibited	3	2	2.08824
ALDH1A1	aldehyde dehydrogenase 1 family, member A1	2	1	2.08823
KIF26B	kinesin family member 26B	0	1	2.08823
LACE1	lactation elevated 1	0	1	2.08823
RHOV	ras homolog family member V	0	1	2.08823
MIDN	midnolin	0	2	2.07299
ZNF385A	zinc finger protein 385A	0	2	2.07299
ADRA1B	adrenoceptor alpha 1B	4	1	2.05797
PBK	PDZ binding kinase	0	1	2.05797
PTH	parathyroid hormone	1	1	2.05797
WIZ	widely interspaced zinc finger motifs	0	1	2.05797
ACTN1	actinin, alpha 1	8	1	2.02857
C1ORF63	chromosome 1 open reading frame 63	0	1	2.02857
KIAA1370		0	1	2.02857
P2RX4	purinergic receptor P2X, ligand-gated ion channel, 4	2	1	2.02857
PDCD10	programmed cell death 10	0	1	2.02857
RASD1	RAS, dexamethasone-induced 1	0	1	2.02857
GRLF1		3	1	2
WDR6	WD repeat domain 6	0	1	2
NAP1L5	nucleosome assembly protein 1-like 5	0	2	1.98602
MORF4L2	mortality factor 4 like 2	0	1	1.97223
PTPN4	protein tyrosine phosphatase, non-receptor type 4 (megakaryocyte)	0	1	1.97223
RACGAP1	Rac GTPase activating protein 1	0	1	1.97223
DTX3	deltex homolog 3 (Drosophila)	1	1	1.9452
FJX1	four jointed box 1 (Drosophila)	0	1	1.9452
GMCL1	germ cell-less, spermatogenesis associated 1	0	1	1.9452
GRAMD1A	GRAM domain containing 1A	0	1	1.9452
ZNF830	zinc finger protein 830	0	1	1.9452
SNRPD3	small nuclear ribonucleoprotein D3 polypeptide 18kDa	2	1	1.91893
STK17B	serine/threonine kinase 17b	0	1	1.91893
CLDN11	claudin 11	4	2	1.91892
USP32	ubiquitin specific peptidase 32	0	2	1.90604
HOXC10	homeobox C10	0	1	1.89333
MICALCL	MICAL C-terminal like	0	1	1.89333
NAP1L2	nucleosome assembly protein 1-like 2	0	1	1.89333
PFKP	phosphofructokinase, platelet	5	1	1.89333
TMOD2	tropomodulin 2 (neuronal)	0	2	1.89333
TTC39C	tetratricopeptide repeat domain 39C	0	1	1.89333
INHBA	inhibin, beta A	2	1	1.86843
TBC1D17	TBC1 domain family, member 17	0	1	1.86843
TLX3	T-cell leukemia homeobox 3	0	1	1.86843
ERBB3	v-erb-b2 avian erythroblastic leukemia viral oncogene homolog 3	3	2	1.86842
FAT2	FAT atypical cadherin 2	0	2	1.84416
DERL2	derlin 2	1	1	1.84415
KLC1	kinesin light chain 1	0	1	1.84415
MEX3D	mex-3 RNA binding family member D	0	1	1.84415
SOX4	SRY (sex determining region Y)-box 4	0	3	1.82833
PRR16	proline rich 16	0	1	1.82052
RSBN1L	round spermatid basic protein 1-like	0	1	1.82052
DUSP8	dual specificity phosphatase 8	1	1	1.79746
SYAP1	synapse associated protein 1	0	1	1.79746
TBL3	transducin (beta)-like 3	0	1	1.79746
THSD3		0	1	1.79746
MYCN	v-myc avian myelocytomatosis viral oncogene neuroblastoma derived homolog	0	2	1.78616
CAMTA2	calmodulin binding transcription activator 2	0	1	1.775
MESDC1	mesoderm development candidate 1	0	1	1.775
ZFPM2	zinc finger protein, FOG family member 2	0	2	1.76397
CDKN1C	cyclin-dependent kinase inhibitor 1C (p57, Kip2)	1	1	1.75308
BRMS1L	breast cancer metastasis-suppressor 1-like	0	2	1.74233
CUL1	cullin 1	7	1	1.73171
KLRAQ1		0	1	1.73171
SFMBT1	Scm-like with four mbt domains 1	0	1	1.73171
SMAD6	SMAD family member 6	2	1	1.73171
LAMA3	laminin, alpha 3	6	1	1.71085
SERPINB5	serpin peptidase inhibitor, clade B (ovalbumin), member 5	1	1	1.71085
ZNF25	zinc finger protein 25	0	2	1.71084
PPP3CA	protein phosphatase 3, catalytic subunit, alpha isozyme	13	3	1.704
TMEM25	transmembrane protein 25	0	2	1.7006
ATAD2	ATPase family, AAA domain containing 2	0	1	1.69047
DOK6	docking protein 6	0	1	1.69047
NKIRAS1	NFKB inhibitor interacting Ras-like 1	0	1	1.69047
ORAI1	ORAI calcium release-activated calcium modulator 1	0	1	1.69047
TRPC3	transient receptor potential cation channel, subfamily C, member 3	0	1	1.69047
CRIPT	cysteine-rich PDZ-binding protein	0	1	1.67059
FTSJD1		0	1	1.67059
IL25	interleukin 25	1	1	1.67059
NANOS1	nanos homolog 1 (Drosophila)	0	1	1.67059
PDZD11	PDZ domain containing 11	0	1	1.67059
PLCL2	phospholipase C-like 2	0	1	1.65116
TET1	tet methylcytosine dioxygenase 1	0	2	1.65116
KIAA1598	KIAA1598	0	2	1.64162
HNRNPD	heterogeneous nuclear ribonucleoprotein D (AU-rich element RNA binding protein 1, 37kDa)	0	1	1.63219
NEUROG1	neurogenin 1	0	1	1.63219
CAPRIN2	caprin family member 2	0	2	1.62286
DAB2	Dab, mitogen-responsive phosphoprotein, homolog 2 (Drosophila)	1	1	1.61363
FAM130A2		0	1	1.59551
FGD1	FYVE, RhoGEF and PH domain containing 1	1	1	1.59551
FGD4	FYVE, RhoGEF and PH domain containing 4	0	1	1.59551
PHF1	PHD finger protein 1	0	1	1.59551
GPR6	G protein-coupled receptor 6	0	1	1.57777
TIMM8A	translocase of inner mitochondrial membrane 8 homolog A (yeast)	0	1	1.57777
FZD8	frizzled family receptor 8	4	1	1.56044
PLK2	polo-like kinase 2	0	1	1.56044
SEC24B	SEC24 family member B	1	1	1.56044
SOX10	SRY (sex determining region Y)-box 10	0	1	1.56044
WFS1	Wolfram syndrome 1 (wolframin)	1	1	1.56044
CSDE1	cold shock domain containing E1, RNA-binding	0	2	1.55192
TMEM168	transmembrane protein 168	0	2	1.55192
CAMK2N2	calcium/calmodulin-dependent protein kinase II inhibitor 2	0	1	1.54348
NEFM	neurofilament, medium polypeptide	1	1	1.54348
NRBP1	nuclear receptor binding protein 1	0	1	1.54348
SPCS2	signal peptidase complex subunit 2 homolog (S. cerevisiae)	1	1	1.54348
TMEM138	transmembrane protein 138	0	1	1.54348
PEX5L	peroxisomal biogenesis factor 5-like	0	2	1.53514
ACTR2	ARP2 actin-related protein 2 homolog (yeast)	0	2	1.52688
HOXD10	homeobox D10	0	1	1.52688
PRR15	proline rich 15	0	1	1.52688
KIAA1688		0	1	1.51064
SLC35A4	solute carrier family 35, member A4	0	1	1.51064
PURA	purine-rich element binding protein A	0	2	1.50265
SMEK2	SMEK homolog 2, suppressor of mek1 (Dictyostelium)	0	2	1.49473
CALB2	calbindin 2	0	1	1.47917
ITGB3BP	integrin beta 3 binding protein (beta3-endonexin)	0	1	1.47917
KHDRBS2	KH domain containing, RNA binding, signal transduction associated 2	0	1	1.47917
MAP3K5	mitogen-activated protein kinase kinase kinase 5	4	1	1.47917
SRGAP1	SLIT-ROBO Rho GTPase activating protein 1	1	1	1.47917
ZNF323		0	1	1.47917
PPP2R5E	protein phosphatase 2, regulatory subunit B', epsilon isoform	2	2	1.4715
CTSK	cathepsin K	2	1	1.46391
PANX2	pannexin 2	0	1	1.46391
TCEAL7	transcription elongation factor A (SII)-like 7	0	1	1.46391
BHLHB3		1	2	1.44898
EIF2C2		0	1	1.44898
RSRC2	arginine/serine-rich coiled-coil 2	0	1	1.44898
TMEM198	transmembrane protein 198	0	1	1.44898
UPF3A	UPF3 regulator of nonsense transcripts homolog A (yeast)	1	1	1.44898
AJAP1	adherens junctions associated protein 1	0	1	1.43434
JMJD3		0	1	1.43434
PPP1R1A	protein phosphatase 1, regulatory (inhibitor) subunit 1A	1	1	1.43434
RP11-35N6.1		0	1	1.43434
TSHZ3	teashirt zinc finger homeobox 3	0	2	1.43434
VSX1	visual system homeobox 1	0	1	1.43434
MAT2A	methionine adenosyltransferase II, alpha	3	2	1.42713
SLC16A9	solute carrier family 16, member 9	0	2	1.42713
APCDD1	adenomatosis polyposis coli down-regulated 1	0	1	1.42
MAPK10	mitogen-activated protein kinase 10	23	1	1.42
MARCH8	membrane-associated ring finger (C3HC4) 8, E3 ubiquitin protein ligase	0	1	1.42
NONO	non-POU domain containing, octamer-binding	0	1	1.42
RBL1	retinoblastoma-like 1 (p107)	2	1	1.42
ZFYVE9	zinc finger, FYVE domain containing 9	2	1	1.42
ARF4	ADP-ribosylation factor 4	0	1	1.40594
C19ORF2		0	1	1.40594
FAM13A1		0	1	1.40594
STRBP	spermatid perinuclear RNA binding protein	0	1	1.40594
CRK	v-crk avian sarcoma virus CT10 oncogene homolog	13	2	1.39902
IMPDH1	IMP (inosine 5'-monophosphate) dehydrogenase 1	3	1	1.39216
RASL11B	RAS-like, family 11, member B	0	1	1.39216
C4ORF16		0	1	1.37864
MIER2	mesoderm induction early response 1, family member 2	0	1	1.37864
NKX3-2	NK3 homeobox 2	0	1	1.37864
TSPAN13	tetraspanin 13	0	1	1.37864
AKTIP	AKT interacting protein	0	1	1.36538
DDX42	DEAD (Asp-Glu-Ala-Asp) box helicase 42	1	1	1.36538
DMRT3	doublesex and mab-3 related transcription factor 3	0	1	1.36538
DNM2	dynamin 2	3	1	1.36538
ELK3	ELK3, ETS-domain protein (SRF accessory protein 2)	0	1	1.36538
KIF23	kinesin family member 23	0	1	1.36538
OSR1	odd-skipped related transciption factor 1	0	1	1.36538
RNF139	ring finger protein 139	0	1	1.36538
SH3BP5	SH3-domain binding protein 5 (BTK-associated)	0	1	1.36538
CEP70	centrosomal protein 70kDa	0	1	1.35238
GNPDA2	glucosamine-6-phosphate deaminase 2	2	1	1.35238
LNX1	ligand of numb-protein X 1, E3 ubiquitin protein ligase	0	1	1.35238
RAB30	RAB30, member RAS oncogene family	0	1	1.35238
UEVLD	UEV and lactate/malate dehyrogenase domains	0	1	1.35238
UXS1	UDP-glucuronate decarboxylase 1	3	1	1.35238
PBX3	pre-B-cell leukemia homeobox 3	0	2	1.34597
ADHFE1	alcohol dehydrogenase, iron containing, 1	0	1	1.33962
LOC91461		0	1	1.33962
PAIP2	poly(A) binding protein interacting protein 2	0	1	1.33962
SCD5	stearoyl-CoA desaturase 5	2	2	1.33962
TP53BP2	tumor protein p53 binding protein, 2	0	1	1.33962
ZSWIM4	zinc finger, SWIM-type containing 4	0	1	1.33962
ALDH9A1	aldehyde dehydrogenase 9 family, member A1	13	1	1.3271
CIC	capicua transcriptional repressor	0	1	1.3271
SAPS2		0	1	1.3271
TOPORS	topoisomerase I binding, arginine/serine-rich, E3 ubiquitin protein ligase	0	1	1.3271
BICD2	bicaudal D homolog 2 (Drosophila)	0	3	1.32298
TCF12	transcription factor 12	0	2	1.31482
CNN1	calponin 1, basic, smooth muscle	0	1	1.31481
IL8	interleukin 8	13	1	1.31481
NUP35	nucleoporin 35kDa	1	1	1.31481
SULT2A1	sulfotransferase family, cytosolic, 2A, dehydroepiandrosterone (DHEA)-preferring, member 1	0	1	1.31481
WDR40A		0	1	1.31481
B4GALT6	UDP-Gal:betaGlcNAc beta 1,4- galactosyltransferase, polypeptide 6	2	2	1.30875
C7ORF43	chromosome 7 open reading frame 43	0	1	1.30275
CCDC64	coiled-coil domain containing 64	0	1	1.30275
EGLN1	egl-9 family hypoxia-inducible factor 1	2	1	1.30275
DNAJC14	DnaJ (Hsp40) homolog, subfamily C, member 14	0	1	1.29091
DUSP2	dual specificity phosphatase 2	1	1	1.29091
E2F5	E2F transcription factor 5, p130-binding	2	1	1.29091
MLL3		0	2	1.29091
RBBP7	retinoblastoma binding protein 7	0	1	1.29091
RNF6	ring finger protein (C3H2C3 type) 6	0	1	1.29091
SLC29A2	solute carrier family 29 (equilibrative nucleoside transporter), member 2	0	1	1.29091
C16ORF45	chromosome 16 open reading frame 45	0	1	1.27928
C20ORF103		0	1	1.27928
GNAI2	guanine nucleotide binding protein (G protein), alpha inhibiting activity polypeptide 2	11	1	1.27928
GPR137B	G protein-coupled receptor 137B	0	1	1.27928
IL1RAPL1	interleukin 1 receptor accessory protein-like 1	0	1	1.27928
RP5-1000E10.4		1	1	1.27928
BAMBI	BMP and activin membrane-bound inhibitor	0	1	1.26786
CCDC18	coiled-coil domain containing 18	0	1	1.26786
FAM45A	family with sequence similarity 45, member A	0	1	1.26786
TRIM3	tripartite motif containing 3	0	1	1.26786
ABCB9	ATP-binding cassette, sub-family B (MDR/TAP), member 9	2	1	1.25664
EPHB4	EPH receptor B4	1	1	1.25664
NAP5		0	1	1.25664
SLC2A4	solute carrier family 2 (facilitated glucose transporter), member 4	3	1	1.25664
SLITRK2	SLIT and NTRK-like family, member 2	0	1	1.25664
WDR77	WD repeat domain 77	0	1	1.25664
PCDHA10	protocadherin alpha 10	0	2	1.24018
ZNF362	zinc finger protein 362	0	2	1.24018
CDC37L1	cell division cycle 37-like 1	0	1	1.23478
PAK7	p21 protein (Cdc42/Rac)-activated kinase 7	6	2	1.23478
PTP4A2	protein tyrosine phosphatase type IVA, member 2	0	1	1.23478
YPEL4	yippee-like 4 (Drosophila)	0	1	1.23478
FRAP1		9	1	1.22414
HOXB5	homeobox B5	0	1	1.22414
SMOC2	SPARC related modular calcium binding 2	0	1	1.22414
CYP26B1	cytochrome P450, family 26, subfamily B, polypeptide 1	1	2	1.21888
CDCA7	cell division cycle associated 7	0	1	1.21367
F3	coagulation factor III (thromboplastin, tissue factor)	1	1	1.21367
MIS12	MIS12 kinetochore complex component	0	1	1.21367
FAM117A	family with sequence similarity 117, member A	0	1	1.20339
HCN4	hyperpolarization activated cyclic nucleotide-gated potassium channel 4	0	1	1.20339
MAP3K11	mitogen-activated protein kinase kinase kinase 11	1	1	1.20339
OTUD4	OTU domain containing 4	0	3	1.20339
PCDHA1	protocadherin alpha 1	0	2	1.20339
PCDHA3	protocadherin alpha 3	0	2	1.20339
PCDHA5	protocadherin alpha 5	0	2	1.20339
PCDHA7	protocadherin alpha 7	0	2	1.20339
PCDHA8	protocadherin alpha 8	0	2	1.20339
RPP14	ribonuclease P/MRP 14kDa subunit	1	1	1.20339
HECTD2	HECT domain containing E3 ubiquitin protein ligase 2	0	2	1.19328
CHMP4B	charged multivesicular body protein 4B	1	1	1.19327
NBL1	neuroblastoma 1, DAN family BMP antagonist	0	1	1.19327
NUP62	nucleoporin 62kDa	1	1	1.19327
PAIP1	poly(A) binding protein interacting protein 1	1	1	1.19327
BNIP3L	BCL2/adenovirus E1B 19kDa interacting protein 3-like	0	2	1.18333
GALNTL2		2	1	1.18333
POU3F1	POU class 3 homeobox 1	0	1	1.18333
RAPGEF4	Rap guanine nucleotide exchange factor (GEF) 4	1	1	1.18333
CABLES1	Cdk5 and Abl enzyme substrate 1	0	1	1.17355
OSM	oncostatin M	2	1	1.17355
ST5	suppression of tumorigenicity 5	0	1	1.17355
WWP1	WW domain containing E3 ubiquitin protein ligase 1	2	1	1.17355
PPP3R1	protein phosphatase 3, regulatory subunit B, alpha	13	2	1.16872
BBC3	BCL2 binding component 3	2	1	1.16393
IRF1	interferon regulatory factor 1	1	1	1.16393
PPP1R15B	protein phosphatase 1, regulatory subunit 15B	0	2	1.16393
SIDT2	SID1 transmembrane family, member 2	0	1	1.16393
STMN1	stathmin 1	1	1	1.16393
UCP3	uncoupling protein 3 (mitochondrial, proton carrier)	0	1	1.16393
AHNAK	AHNAK nucleoprotein	0	1	1.15447
RAB12	RAB12, member RAS oncogene family	0	1	1.15447
SAR1B	SAR1 homolog B (S. cerevisiae)	1	1	1.15447
SYT10	synaptotagmin X	0	1	1.15447
TNFRSF21	tumor necrosis factor receptor superfamily, member 21	1	1	1.15447
ZHX2	zinc fingers and homeoboxes 2	0	1	1.15447
MYEOV	myeloma overexpressed	0	1	1.14516
OSBPL5	oxysterol binding protein-like 5	0	1	1.14516
PAPOLB	poly(A) polymerase beta (testis specific)	1	1	1.14516
SKI	v-ski avian sarcoma viral oncogene homolog	0	1	1.14516
TRIM8	tripartite motif containing 8	0	1	1.14516
WSB2	WD repeat and SOCS box containing 2	0	1	1.14516
HEXIM1	hexamethylene bis-acetamide inducible 1	0	2	1.14056
MAPRE3	microtubule-associated protein, RP/EB family, member 3	0	2	1.14056
HERPUD2	HERPUD family member 2	0	1	1.136
POLQ	polymerase (DNA directed), theta	0	1	1.136
PRDM10	PR domain containing 10	0	2	1.136
SART1	squamous cell carcinoma antigen recognized by T cells	1	1	1.136
SNIP		0	1	1.136
SOLH		0	1	1.136
TTC8	tetratricopeptide repeat domain 8	0	1	1.136
CDK6	cyclin-dependent kinase 6	9	4	1.12922
B3GALT2	UDP-Gal:betaGlcNAc beta 1,3-galactosyltransferase, polypeptide 2	2	1	1.12698
GARNL1		0	1	1.12698
JRKL	jerky homolog-like (mouse)	0	1	1.12698
RABEP1	rabaptin, RAB GTPase binding effector protein 1	1	1	1.12698
TAOK2	TAO kinase 2	1	1	1.12698
TMEM100	transmembrane protein 100	0	1	1.12698
UBXN2A	UBX domain protein 2A	0	1	1.12698
ZBTB9	zinc finger and BTB domain containing 9	0	1	1.12698
GAN	gigaxonin	0	2	1.12253
JAZF1	JAZF zinc finger 1	0	2	1.12253
TIAM1	T-cell lymphoma invasion and metastasis 1	2	2	1.12253
ASF1A	anti-silencing function 1A histone chaperone	0	1	1.11811
CLIC2	chloride intracellular channel 2	0	1	1.11811
GBF1	golgi brefeldin A resistant guanine nucleotide exchange factor 1	0	1	1.11811
GNAO1	guanine nucleotide binding protein (G protein), alpha activating activity polypeptide O	4	1	1.11811
IRF2	interferon regulatory factor 2	0	1	1.11811
MAN1C1	mannosidase, alpha, class 1C, member 1	3	1	1.11811
SEC24C	SEC24 family member C	1	1	1.11811
UBE2E2	ubiquitin-conjugating enzyme E2E 2	2	1	1.11811
ZADH2	zinc binding alcohol dehydrogenase domain containing 2	0	2	1.11811
ANKRD52	ankyrin repeat domain 52	0	2	1.10938
C9ORF82		0	1	1.10937
CCDC137	coiled-coil domain containing 137	0	1	1.10937
DPP8	dipeptidyl-peptidase 8	0	1	1.10937
FAM19A1	family with sequence similarity 19 (chemokine (C-C motif)-like), member A1	0	1	1.10937
FRAT2	frequently rearranged in advanced T-cell lymphomas 2	1	1	1.10937
KBTBD2	kelch repeat and BTB (POZ) domain containing 2	0	1	1.10937
LHX8	LIM homeobox 8	0	1	1.10937
SNX4	sorting nexin 4	0	1	1.10937
SQSTM1	sequestosome 1	0	1	1.10937
TAOK3	TAO kinase 3	1	1	1.10937
AXIN2	axin 2	5	1	1.10078
BTBD10	BTB (POZ) domain containing 10	0	1	1.10078
CDC23	cell division cycle 23	4	1	1.10078
FAM13C1		0	1	1.10078
MAPK9	mitogen-activated protein kinase 9	24	1	1.10078
RIMBP2	RIMS binding protein 2	0	2	1.10078
RNF24	ring finger protein 24	0	1	1.10078
SCN2A	sodium channel, voltage-gated, type II, alpha subunit	0	2	1.10078
ST6GALNAC6	ST6 (alpha-N-acetyl-neuraminyl-2,3-beta-galactosyl-1,3)-N-acetylgalactosaminide alpha-2,6-sialyltransferase 6	2	1	1.10078
TMPRSS13	transmembrane protease, serine 13	0	1	1.10078
ICMT	isoprenylcysteine carboxyl methyltransferase	0	2	1.09652
KIAA0494		0	2	1.09231
SALL1	spalt-like transcription factor 1	0	1	1.09231
TAF5	TAF5 RNA polymerase II, TATA box binding protein (TBP)-associated factor, 100kDa	1	1	1.09231
PITPNM2	phosphatidylinositol transfer protein, membrane-associated 2	0	2	1.08812
SLAIN2	SLAIN motif family, member 2	0	2	1.08812
CDKN1B	cyclin-dependent kinase inhibitor 1B (p27, Kip1)	6	1	1.08397
CEP120	centrosomal protein 120kDa	0	1	1.08397
MED17	mediator complex subunit 17	0	1	1.08397
SP100	SP100 nuclear antigen	0	1	1.08397
OSTM1	osteopetrosis associated transmembrane protein 1	0	2	1.07985
ARHGEF18	Rho/Rac guanine nucleotide exchange factor (GEF) 18	0	1	1.07576
CD4	CD4 molecule	5	1	1.07576
GAB1	GRB2-associated binding protein 1	4	1	1.07576
RAP1B	RAP1B, member of RAS oncogene family	8	1	1.07576
SATB1	SATB homeobox 1	0	1	1.07576
SCN3A	sodium channel, voltage-gated, type III, alpha subunit	0	2	1.07576
CROT	carnitine O-octanoyltransferase	1	1	1.06767
HN1	hematological and neurological expressed 1	0	1	1.06767
STK33	serine/threonine kinase 33	0	1	1.06767
TCF7L1	transcription factor 7-like 1 (T-cell specific, HMG-box)	11	1	1.06767
ETF1	eukaryotic translation termination factor 1	0	2	1.06367
PPM1B	protein phosphatase, Mg2+/Mn2+ dependent, 1B	1	2	1.06367
KIT	v-kit Hardy-Zuckerman 4 feline sarcoma viral oncogene homolog	6	1	1.0597
TBC1D15	TBC1 domain family, member 15	0	1	1.0597
UNC84B		0	1	1.0597
STYX	serine/threonine/tyrosine interacting protein	0	2	1.05576
ARHGEF11	Rho guanine nucleotide exchange factor (GEF) 11	1	1	1.05185
ELAVL2	ELAV like neuron-specific RNA binding protein 2	0	2	1.05185
HAS2	hyaluronan synthase 2	0	1	1.05185
KIAA1191	KIAA1191	0	1	1.05185
MCHR2	melanin-concentrating hormone receptor 2	1	1	1.05185
MSI1	musashi RNA-binding protein 1	0	1	1.05185
TMEM133	transmembrane protein 133	0	1	1.05185
ZFP161		0	1	1.05185
ABT1	activator of basal transcription 1	0	1	1.04412
ANKRD13C	ankyrin repeat domain 13C	0	1	1.04412
ARID1A	AT rich interactive domain 1A (SWI-like)	0	1	1.04412
FOXF1	forkhead box F1	0	1	1.04412
GAS8	growth arrest-specific 8	0	1	1.04412
LIMA1	LIM domain and actin binding 1	0	1	1.04412
MAP3K8	mitogen-activated protein kinase kinase kinase 8	3	1	1.04412
NRBF2	nuclear receptor binding factor 2	0	1	1.04412
GABBR2	gamma-aminobutyric acid (GABA) B receptor, 2	1	2	1.04029
SPOCK1	sparc/osteonectin, cwcv and kazal-like domains proteoglycan (testican) 1	0	2	1.04029
USP6	ubiquitin specific peptidase 6 (Tre-2 oncogene)	0	2	1.04029
VEZF1	vascular endothelial zinc finger 1	0	2	1.04029
PHOX2B	paired-like homeobox 2b	0	1	1.03649
POU6F1	POU class 6 homeobox 1	0	1	1.03649
PTGER2	prostaglandin E receptor 2 (subtype EP2), 53kDa	1	1	1.03649
SC4MOL		2	1	1.03649
SHCBP1	SHC SH2-domain binding protein 1	0	1	1.03649
TIMM17A	translocase of inner mitochondrial membrane 17 homolog A (yeast)	0	1	1.03649
USP28	ubiquitin specific peptidase 28	0	1	1.03649
ANGPTL2	angiopoietin-like 2	0	1	1.02899
C15ORF17		0	1	1.02899
CAPN7	calpain 7	0	1	1.02899
FAM57A	family with sequence similarity 57, member A	0	1	1.02899
KDR	kinase insert domain receptor (a type III receptor tyrosine kinase)	4	1	1.02899
KLHL13	kelch-like family member 13	1	1	1.02899
KLHL2	kelch-like family member 2	0	1	1.02899
MMP2	matrix metallopeptidase 2 (gelatinase A, 72kDa gelatinase, 72kDa type IV collagenase)	4	1	1.02899
PCDHA11	protocadherin alpha 11	0	2	1.02899
PCDHA12	protocadherin alpha 12	0	2	1.02899
RNF128	ring finger protein 128, E3 ubiquitin protein ligase	0	1	1.02899
SLC30A3	solute carrier family 30 (zinc transporter), member 3	0	1	1.02899
SMAD1	SMAD family member 1	1	1	1.02899
CTDSPL2	CTD (carboxy-terminal domain, RNA polymerase II, polypeptide A) small phosphatase like 2	0	2	1.02527
PCDHA2	protocadherin alpha 2	0	2	1.02527
BTN3A1	butyrophilin, subfamily 3, member A1	0	1	1.02158
F2RL3	coagulation factor II (thrombin) receptor-like 3	1	1	1.02158
FAM134A	family with sequence similarity 134, member A	0	1	1.02158
PAFAH2	platelet-activating factor acetylhydrolase 2, 40kDa	2	1	1.02158
SCOC	short coiled-coil protein	0	1	1.02158
SOCS3	suppressor of cytokine signaling 3	6	1	1.02158
TARDBP	TAR DNA binding protein	0	2	1.02158
FGFR3	fibroblast growth factor receptor 3	5	1	1.01429
HEY1	hes-related family bHLH transcription factor with YRPW motif 1	0	1	1.01429
RAD21	RAD21 homolog (S. pombe)	1	1	1.01429
PTPN3	protein tyrosine phosphatase, non-receptor type 3	0	2	1.01068
DNAJB6	DnaJ (Hsp40) homolog, subfamily B, member 6	0	1	1.00709
FAM177A1	family with sequence similarity 177, member A1	0	1	1.00709
FGD5	FYVE, RhoGEF and PH domain containing 5	0	1	1.00709
HNRNPH3	heterogeneous nuclear ribonucleoprotein H3 (2H9)	0	1	1.00709
USP3	ubiquitin specific peptidase 3	0	1	1.00709
CIT	citron (rho-interacting, serine/threonine kinase 21)	0	2	1.00353
C1ORF93		0	1	1
ORMDL3	ORM1-like 3 (S. cerevisiae)	0	1	1
TXNIP	thioredoxin interacting protein	0	1	1
UBR5	ubiquitin protein ligase E3 component n-recognin 5	1	1	1
AKAP13	A kinase (PRKA) anchor protein 13	0	2	0.996492
CDH5	cadherin 5, type 2 (vascular endothelium)	2	1	0.993009
DGKB	diacylglycerol kinase, beta 90kDa	4	1	0.993009
FERMT2	fermitin family member 2	0	1	0.993009
GTF2H1	general transcription factor IIH, polypeptide 1, 62kDa	2	1	0.993009
THAP1	THAP domain containing, apoptosis associated protein 1	0	1	0.993009
SLC4A7	solute carrier family 4, sodium bicarbonate cotransporter, member 7	0	2	0.993007
AIDA	axin interactor, dorsalization associated	0	1	0.986111
CAMK2N1	calcium/calmodulin-dependent protein kinase II inhibitor 1	0	1	0.986111
FXR1	fragile X mental retardation, autosomal homolog 1	0	1	0.986111
MTMR3	myotubularin related protein 3	0	2	0.986111
NEUROG2	neurogenin 2	0	1	0.986111
RUNDC1	RUN domain containing 1	0	1	0.986111
FNBP1L	formin binding protein 1-like	0	2	0.9827
PCDHAC2	protocadherin alpha subfamily C, 2	0	2	0.9827
CD69	CD69 molecule	0	1	0.979312
CNGB3	cyclic nucleotide gated channel beta 3	0	1	0.979312
EIF4G2	eukaryotic translation initiation factor 4 gamma, 2	2	1	0.979312
HABP4	hyaluronan binding protein 4	0	1	0.979312
MBD2	methyl-CpG binding domain protein 2	0	1	0.979312
PRR11	proline rich 11	0	1	0.979312
RNF4	ring finger protein 4	0	1	0.979312
TNFSF11	tumor necrosis factor (ligand) superfamily, member 11	1	1	0.979312
AMPH	amphiphysin	1	1	0.972602
ATG16L1	autophagy related 16-like 1 (S. cerevisiae)	0	1	0.972602
DYNC1LI2	dynein, cytoplasmic 1, light intermediate chain 2	2	2	0.972602
HS3ST2	heparan sulfate (glucosamine) 3-O-sulfotransferase 2	1	1	0.972602
NHLH1	nescient helix loop helix 1	0	1	0.972602
PRUNE	prune exopolyphosphatase	1	1	0.972602
TBX3	T-box 3	0	1	0.972602
HIF1A	hypoxia inducible factor 1, alpha subunit (basic helix-loop-helix transcription factor)	3	1	0.965988
JAK1	Janus kinase 1	6	1	0.965988
SKP1	S-phase kinase-associated protein 1	7	1	0.965988
WAC	WW domain containing adaptor with coiled-coil	0	1	0.965988
PCDHAC1	protocadherin alpha subfamily C, 1	0	2	0.95946
IRF9	interferon regulatory factor 9	2	1	0.959458
KLF10	Kruppel-like factor 10	0	1	0.959458
LIMK1	LIM domain kinase 1	3	1	0.959458
TBC1D9	TBC1 domain family, member 9 (with GRAM domain)	0	1	0.959458
GMFB	glia maturation factor, beta	0	2	0.953021
NEUROD2	neuronal differentiation 2	0	1	0.953021
TRIM37	tripartite motif containing 37	1	1	0.953021
ARHGEF10	Rho guanine nucleotide exchange factor (GEF) 10	0	1	0.946665
BNIP2	BCL2/adenovirus E1B 19kDa interacting protein 2	0	1	0.946665
MINK1	misshapen-like kinase 1	0	1	0.946665
MYLIP	myosin regulatory light chain interacting protein	0	1	0.946665
PTHLH	parathyroid hormone-like hormone	0	1	0.946665
CNR1	cannabinoid receptor 1 (brain)	1	2	0.943521
APP	amyloid beta (A4) precursor protein	1	1	0.940398
ASB7	ankyrin repeat and SOCS box containing 7	0	1	0.940398
E2F1	E2F transcription factor 1	10	1	0.940398
FOXJ3	forkhead box J3	0	2	0.940398
MAT2B	methionine adenosyltransferase II, beta	3	1	0.940398
PCDHA6	protocadherin alpha 6	0	2	0.940398
RPS6KA1	ribosomal protein S6 kinase, 90kDa, polypeptide 1	6	1	0.940398
SHOX2	short stature homeobox 2	0	1	0.940398
SUMF1	sulfatase modifying factor 1	1	1	0.940398
UBE2J1	ubiquitin-conjugating enzyme E2, J1	3	2	0.937293
PCDHA4	protocadherin alpha 4	0	2	0.934211
DNAJB9	DnaJ (Hsp40) homolog, subfamily B, member 9	0	1	0.934208
FASTK	Fas-activated serine/threonine kinase	0	1	0.934208
HPS5	Hermansky-Pudlak syndrome 5	0	1	0.934208
PLS1	plastin 1	0	1	0.934208
UNK	unkempt family zinc finger	0	1	0.934208
CEP57	centrosomal protein 57kDa	0	1	0.928104
FAM3C	family with sequence similarity 3, member C	0	1	0.928104
FOXA1	forkhead box A1	0	1	0.928104
GRM7	glutamate receptor, metabotropic 7	1	1	0.928104
JMJD2A		0	1	0.928104
PGBD5	piggyBac transposable element derived 5	0	1	0.928104
TMEM55A	transmembrane protein 55A	0	1	0.928104
EIF5	eukaryotic translation initiation factor 5	1	2	0.925082
CSGALNACT1	chondroitin sulfate N-acetylgalactosaminyltransferase 1	2	1	0.92208
DPYSL5	dihydropyrimidinase-like 5	1	1	0.92208
FLJ36031		0	1	0.92208
ITGA4	integrin, alpha 4 (antigen CD49D, alpha 4 subunit of VLA-4 receptor)	11	1	0.92208
ZNF2	zinc finger protein 2	0	1	0.92208
ATXN1	ataxin 1	0	3	0.920086
ADNP2	ADNP homeobox 2	0	1	0.916128
APOBEC4	apolipoprotein B mRNA editing enzyme, catalytic polypeptide-like 4 (putative)	0	1	0.916128
CHD5	chromodomain helicase DNA binding protein 5	0	2	0.916128
FRY	furry homolog (Drosophila)	0	1	0.916128
MKNK2	MAP kinase interacting serine/threonine kinase 2	2	1	0.916128
RRM2	ribonucleotide reductase M2	5	1	0.916128
SLC17A4	solute carrier family 17, member 4	0	1	0.916128
SNAP29	synaptosomal-associated protein, 29kDa	1	1	0.916128
DEDD	death effector domain containing	0	1	0.910258
NEO1	neogenin 1	1	1	0.910258
NMUR1	neuromedin U receptor 1	1	1	0.910258
NPAS2	neuronal PAS domain protein 2	1	1	0.910258
RNF145	ring finger protein 145	0	1	0.910258
UNKL	unkempt family zinc finger-like	0	1	0.910258
ZNFX1	zinc finger, NFX1-type containing 1	0	1	0.910258
QKI	QKI, KH domain containing, RNA binding	0	3	0.904459
C16ORF63		0	1	0.904458
IKZF4	IKAROS family zinc finger 4 (Eos)	0	2	0.904458
IQSEC1	IQ motif and Sec7 domain 1	1	1	0.904458
PCDHA13	protocadherin alpha 13	0	2	0.904458
SEMA3C	sema domain, immunoglobulin domain (Ig), short basic domain, secreted, (semaphorin) 3C	1	1	0.904458
SLC17A7	solute carrier family 17 (vesicular glutamate transporter), member 7	0	1	0.904458
ANO1	anoctamin 1, calcium activated chloride channel	0	1	0.898735
BRD1	bromodomain containing 1	0	1	0.898735
C12ORF30		0	1	0.898735
CC2D1A	coiled-coil and C2 domain containing 1A	0	1	0.898735
CRYBG3	beta-gamma crystallin domain containing 3	0	1	0.898735
D4S234E		0	1	0.898735
EGR2	early growth response 2	0	1	0.898735
KIAA1267		0	1	0.898735
MAP4K5	mitogen-activated protein kinase kinase kinase kinase 5	0	1	0.898735
RBL2	retinoblastoma-like 2 (p130)	2	1	0.898735
SGMS1	sphingomyelin synthase 1	2	1	0.898735
SLC4A4	solute carrier family 4 (sodium bicarbonate cotransporter), member 4	2	2	0.898735
ZNF197	zinc finger protein 197	0	1	0.898735
CEP55	centrosomal protein 55kDa	0	1	0.89308
EGR1	early growth response 1	1	1	0.89308
INA	internexin neuronal intermediate filament protein, alpha	0	1	0.89308
MARCKS	myristoylated alanine-rich protein kinase C substrate	1	1	0.89308
PAK1	p21 protein (Cdc42/Rac)-activated kinase 1	11	1	0.89308
PLEKHA3	pleckstrin homology domain containing, family A (phosphoinositide binding specific) member 3	0	1	0.89308
PPP2R1B	protein phosphatase 2, regulatory subunit A, beta	7	1	0.89308
TCTEX1D1	Tctex1 domain containing 1	0	1	0.89308
ALKBH5	alkB, alkylation repair homolog 5 (E. coli)	0	1	0.8875
COX7A2L	cytochrome c oxidase subunit VIIa polypeptide 2 like	5	1	0.8875
CXCL14	chemokine (C-X-C motif) ligand 14	2	1	0.8875
GNB5	guanine nucleotide binding protein (G protein), beta 5	1	1	0.8875
LDLRAP1	low density lipoprotein receptor adaptor protein 1	1	1	0.8875
PLEKHB2	pleckstrin homology domain containing, family B (evectins) member 2	0	1	0.8875
UBAP1	ubiquitin associated protein 1	0	1	0.8875
VPS26A	vacuolar protein sorting 26 homolog A (S. pombe)	0	1	0.8875
BCL2L11	BCL2-like 11 (apoptosis facilitator)	0	2	0.884735
ATP2B2	ATPase, Ca++ transporting, plasma membrane 2	3	2	0.881988
LUZP1	leucine zipper protein 1	0	2	0.881988
SEC63	SEC63 homolog (S. cerevisiae)	2	1	0.881986
NOTCH2	notch 2	2	2	0.879256
WDR37	WD repeat domain 37	0	2	0.879256
CCNG2	cyclin G2	1	1	0.876543
CEP135	centrosomal protein 135kDa	0	1	0.876543
DLX1	distal-less homeobox 1	0	1	0.876543
LRIG1	leucine-rich repeats and immunoglobulin-like domains 1	0	1	0.876543
ZNF217	zinc finger protein 217	0	1	0.876543
BTN1A1	butyrophilin, subfamily 1, member A1	0	1	0.871167
CA10	carbonic anhydrase X	0	1	0.871167
FLT1	fms-related tyrosine kinase 1	3	1	0.871167
IMPAD1	inositol monophosphatase domain containing 1	0	1	0.871167
SLC25A37	solute carrier family 25 (mitochondrial iron transporter), member 37	0	1	0.871167
USP53	ubiquitin specific peptidase 53	0	1	0.871167
C7ORF41		0	2	0.871166
CAMTA1	calmodulin binding transcription activator 1	0	2	0.871166
TMCC1	transmembrane and coiled-coil domain family 1	0	2	0.868502
CHSY1	chondroitin sulfate synthase 1	2	1	0.865853
CPEB3	cytoplasmic polyadenylation element binding protein 3	0	2	0.865853
ENPP5	ectonucleotide pyrophosphatase/phosphodiesterase 5 (putative)	0	1	0.865853
HOXD1	homeobox D1	0	1	0.865853
NOL4	nucleolar protein 4	0	1	0.865853
NXPH1	neurexophilin 1	0	1	0.865853
PCTP	phosphatidylcholine transfer protein	0	1	0.865853
SLC17A6	solute carrier family 17 (vesicular glutamate transporter), member 6	0	1	0.865853
PIK3R1	phosphoinositide-3-kinase, regulatory subunit 1 (alpha)	39	2	0.863222
CHRM2	cholinergic receptor, muscarinic 2	3	1	0.860607
CSNK2A1	casein kinase 2, alpha 1 polypeptide	3	1	0.860607
EIF3J	eukaryotic translation initiation factor 3, subunit J	1	1	0.860607
OLFM4	olfactomedin 4	0	1	0.860607
POLS		1	1	0.860607
RORC	RAR-related orphan receptor C	1	1	0.860607
SLC11A1	solute carrier family 11 (proton-coupled divalent metal ion transporter), member 1	1	1	0.860607
SLITRK3	SLIT and NTRK-like family, member 3	0	1	0.860607
TMUB2	transmembrane and ubiquitin-like domain containing 2	0	1	0.860607
CTDSPL	CTD (carboxy-terminal domain, RNA polymerase II, polypeptide A) small phosphatase-like	0	2	0.858006
PHACTR4	phosphatase and actin regulator 4	0	2	0.858006
CASP7	caspase 7, apoptosis-related cysteine peptidase	2	1	0.855421
CLIP4	CAP-GLY domain containing linker protein family, member 4	0	1	0.855421
EFNB2	ephrin-B2	1	2	0.855421
F2R	coagulation factor II (thrombin) receptor	5	1	0.855421
FBXL5	F-box and leucine-rich repeat protein 5	0	1	0.855421
RAB1A	RAB1A, member RAS oncogene family	0	1	0.855421
RCC2	regulator of chromosome condensation 2	0	1	0.855421
TUSC2	tumor suppressor candidate 2	0	1	0.855421
UBE2H	ubiquitin-conjugating enzyme E2H	1	1	0.855421
ST8SIA2	ST8 alpha-N-acetyl-neuraminide alpha-2,8-sialyltransferase 2	0	2	0.852853
ABI1	abl-interactor 1	0	1	0.8503
ACPL2	acid phosphatase-like 2	0	1	0.8503
ELOVL4	ELOVL fatty acid elongase 4	0	1	0.8503
GABRA1	gamma-aminobutyric acid (GABA) A receptor, alpha 1	1	1	0.8503
KLHL20	kelch-like family member 20	0	1	0.8503
ANUBL1		0	1	0.845237
CTCF	CCCTC-binding factor (zinc finger protein)	0	1	0.845237
SNAP23	synaptosomal-associated protein, 23kDa	1	1	0.845237
ARHGAP1	Rho GTPase activating protein 1	0	1	0.840237
ATP1B1	ATPase, Na+/K+ transporting, beta 1 polypeptide	8	1	0.840237
C14ORF145		0	1	0.840237
NTN4	netrin 4	1	1	0.840237
RPS6KA5	ribosomal protein S6 kinase, 90kDa, polypeptide 5	3	1	0.840237
WARS2	tryptophanyl tRNA synthetase 2, mitochondrial	2	1	0.840237
ZNF644	zinc finger protein 644	0	1	0.840237
NTNG1	netrin G1	1	2	0.837758
FZD5	frizzled family receptor 5	4	2	0.835295
COL4A1	collagen, type IV, alpha 1	6	1	0.835293
DAZAP2	DAZ associated protein 2	0	1	0.835293
PLSCR4	phospholipid scramblase 4	0	1	0.835293
PREX1	phosphatidylinositol-3,4,5-trisphosphate-dependent Rac exchange factor 1	1	1	0.835293
RB1CC1	RB1-inducible coiled-coil 1	0	1	0.835293
HS3ST4	heparan sulfate (glucosamine) 3-O-sulfotransferase 4	0	1	0.83041
PPP1R8	protein phosphatase 1, regulatory subunit 8	0	1	0.83041
SCRT2	scratch family zinc finger 2	0	1	0.83041
ZHX1	zinc fingers and homeoboxes 1	0	1	0.83041
BCL11A	B-cell CLL/lymphoma 11A (zinc finger protein)	0	2	0.827988
AMMECR1	Alport syndrome, mental retardation, midface hypoplasia and elliptocytosis chromosomal region gene 1	0	2	0.825581
FNDC3A	fibronectin type III domain containing 3A	0	2	0.825581
SOCS4	suppressor of cytokine signaling 4	3	2	0.825581
EGFLAM	EGF-like, fibronectin type III and laminin G domains	0	1	0.82558
PCDH10	protocadherin 10	0	1	0.82558
SMC2	structural maintenance of chromosomes 2	0	1	0.82558
WEE1	WEE1 G2 checkpoint kinase	1	1	0.82558
ZFYVE16	zinc finger, FYVE domain containing 16	2	1	0.82558
ESR1	estrogen receptor 1	0	2	0.823189
HBP1	HMG-box transcription factor 1	0	1	0.820809
HOOK3	hook microtubule-tethering protein 3	0	1	0.820809
KLF12	Kruppel-like factor 12	0	3	0.820809
MYO10	myosin X	1	1	0.820809
PKIA	protein kinase (cAMP-dependent, catalytic) inhibitor alpha	0	1	0.820809
RNF38	ring finger protein 38	0	2	0.820809
SHPRH	SNF2 histone linker PHD RING helicase, E3 ubiquitin protein ligase	0	1	0.820809
USP33	ubiquitin specific peptidase 33	0	1	0.820809
ANKRD29	ankyrin repeat domain 29	0	1	0.816093
ATF7IP2	activating transcription factor 7 interacting protein 2	0	1	0.816093
PTGDR	prostaglandin D2 receptor (DP)	1	1	0.816093
RUNX3	runt-related transcription factor 3	0	1	0.816093
SFRS3		1	1	0.816093
GUCY1A3	guanylate cyclase 1, soluble, alpha 3	5	1	0.811428
JAM3	junctional adhesion molecule 3	4	1	0.811428
MFN2	mitofusin 2	0	1	0.811428
MTCH2	mitochondrial carrier 2	0	1	0.811428
POU4F2	POU class 4 homeobox 2	0	1	0.811428
TTC30A	tetratricopeptide repeat domain 30A	0	1	0.811428
SHANK2	SH3 and multiple ankyrin repeat domains 2	0	2	0.809117
FBXO31	F-box protein 31	0	1	0.806819
KIF13A	kinesin family member 13A	0	1	0.806819
NDEL1	nudE neurodevelopment protein 1-like 1	0	1	0.806819
PTPRF	protein tyrosine phosphatase, receptor type, F	3	1	0.806819
PAFAH1B1	platelet-activating factor acetylhydrolase 1b, regulatory subunit 1 (45kDa)	2	2	0.806818
MECP2	methyl CpG binding protein 2 (Rett syndrome)	0	3	0.805293
C14ORF28	chromosome 14 open reading frame 28	0	1	0.802259
HMGCS1	3-hydroxy-3-methylglutaryl-CoA synthase 1 (soluble)	5	1	0.802259
PCSK1	proprotein convertase subtilisin/kexin type 1	0	1	0.802259
UBE2Q2	ubiquitin-conjugating enzyme E2Q family member 2	1	1	0.802259
MAP7	microtubule-associated protein 7	0	1	0.797754
NETO2	neuropilin (NRP) and tolloid (TLL)-like 2	0	1	0.797754
PKD2	polycystic kidney disease 2 (autosomal dominant)	0	1	0.797754
RGMA	RGM domain family, member A	0	1	0.797754
SACS	spastic ataxia of Charlevoix-Saguenay (sacsin)	0	1	0.797754
TJP1	tight junction protein 1	5	1	0.797754
MED12L	mediator complex subunit 12-like	0	1	0.793295
PAM	peptidylglycine alpha-amidating monooxygenase	0	1	0.793295
POLR3G	polymerase (RNA) III (DNA directed) polypeptide G (32kD)	5	1	0.793295
UBE3C	ubiquitin protein ligase E3C	1	1	0.793295
ANP32E	acidic (leucine-rich) nuclear phosphoprotein 32 family, member E	0	1	0.788889
M6PR	mannose-6-phosphate receptor (cation dependent)	2	1	0.788889
MYCBP	MYC binding protein	0	1	0.788889
SYNE2	spectrin repeat containing, nuclear envelope 2	0	1	0.788889
TRUB1	TruB pseudouridine (psi) synthase family member 1	0	1	0.788889
ULK1	unc-51 like autophagy activating kinase 1	2	1	0.788889
TNRC6B	trinucleotide repeat containing 6B	0	3	0.785978
ZC3H12C	zinc finger CCCH-type containing 12C	0	2	0.784531
DIP2A	DIP2 disco-interacting protein 2 homolog A (Drosophila)	0	1	0.784529
EFNB1	ephrin-B1	1	1	0.784529
TIPARP	TCDD-inducible poly(ADP-ribose) polymerase	0	1	0.784529
ZNF202	zinc finger protein 202	0	1	0.784529
CANT1	calcium activated nucleotidase 1	2	1	0.78022
CENPO	centromere protein O	0	1	0.78022
CNOT7	CCR4-NOT transcription complex, subunit 7	1	1	0.78022
FURIN	furin (paired basic amino acid cleaving enzyme)	0	1	0.78022
INHBB	inhibin, beta B	2	1	0.78022
LCP1	lymphocyte cytosolic protein 1 (L-plastin)	0	1	0.78022
RB1	retinoblastoma 1	10	1	0.78022
SRPK2	SRSF protein kinase 2	0	1	0.78022
SUSD1	sushi domain containing 1	0	1	0.78022
ADAMTS3	ADAM metallopeptidase with thrombospondin type 1 motif, 3	0	1	0.775958
BMI1	BMI1 polycomb ring finger oncogene	0	1	0.775958
EFHA2		0	1	0.775958
LYST	lysosomal trafficking regulator	0	1	0.775958
PTPDC1	protein tyrosine phosphatase domain containing 1	0	1	0.775958
SMAD7	SMAD family member 7	2	1	0.775958
UHMK1	U2AF homology motif (UHM) kinase 1	0	1	0.775958
APPBP2	amyloid beta precursor protein (cytoplasmic tail) binding protein 2	0	2	0.773843
CORIN	corin, serine peptidase	0	1	0.771739
INO80	INO80 complex subunit	0	1	0.771739
PANK3	pantothenate kinase 3	2	1	0.771739
MBNL1	muscleblind-like splicing regulator 1	0	2	0.769648
SEPT14	septin 14	0	1	0.767569
ZNF697	zinc finger protein 697	0	1	0.767569
WDR47	WD repeat domain 47	0	1	0.76344
FKBP5	FK506 binding protein 5	0	2	0.761394
KCTD9	potassium channel tetramerization domain containing 9	0	1	0.759359
MUM1L1	melanoma associated antigen (mutated) 1-like 1	0	1	0.759359
PNKD	paroxysmal nonkinesigenic dyskinesia	0	1	0.759359
SLC16A12	solute carrier family 16, member 12	0	1	0.759359
SLC25A36	solute carrier family 25 (pyrimidine nucleotide carrier ), member 36	0	1	0.759359
USP6NL	USP6 N-terminal like	0	1	0.759359
CD47	CD47 molecule	1	2	0.759358
EIF5A2	eukaryotic translation initiation factor 5A2	0	2	0.757333
PRKAB2	protein kinase, AMP-activated, beta 2 non-catalytic subunit	3	2	0.757333
ADO	2-aminoethanethiol (cysteamine) dioxygenase	2	1	0.755318
DENND1B	DENN/MADD domain containing 1B	0	1	0.755318
EPHA5	EPH receptor A5	1	1	0.755318
GTF2E1	general transcription factor IIE, polypeptide 1, alpha 56kDa	1	1	0.755318
OXR1	oxidation resistance 1	0	1	0.755318
TET3	tet methylcytosine dioxygenase 3	0	1	0.755318
CDKN1A	cyclin-dependent kinase inhibitor 1A (p21, Cip1)	10	1	0.751323
FBXO28	F-box protein 28	0	1	0.751323
LRP1B	low density lipoprotein receptor-related protein 1B	0	1	0.751323
SERTAD2	SERTA domain containing 2	0	2	0.751323
SMARCD1	SWI/SNF related, matrix associated, actin dependent regulator of chromatin, subfamily d, member 1	0	1	0.751323
ZDHHC9	zinc finger, DHHC-type containing 9	0	1	0.751323
ARL1	ADP-ribosylation factor-like 1	0	1	0.747367
C14ORF147		0	1	0.747367
EIF4H	eukaryotic translation initiation factor 4H	0	1	0.747367
MYBL1	v-myb avian myeloblastosis viral oncogene homolog-like 1	0	1	0.747367
PLEKHM1	pleckstrin homology domain containing, family M (with RUN domain) member 1	0	1	0.747367
RAB11FIP5	RAB11 family interacting protein 5 (class I)	1	1	0.747367
RASL12	RAS-like, family 12	0	1	0.747367
TANC1	tetratricopeptide repeat, ankyrin repeat and coiled-coil containing 1	0	1	0.747367
VHL	von Hippel-Lindau tumor suppressor, E3 ubiquitin protein ligase	3	1	0.747367
WDR42A		0	1	0.747367
IGF2BP2	insulin-like growth factor 2 mRNA binding protein 2	0	1	0.743456
PLCXD3	phosphatidylinositol-specific phospholipase C, X domain containing 3	0	2	0.743456
PLEKHO2	pleckstrin homology domain containing, family O member 2	1	1	0.743456
SMOC1	SPARC related modular calcium binding 1	0	1	0.743456
TRPM6	transient receptor potential cation channel, subfamily M, member 6	0	1	0.743456
ZZEF1	zinc finger, ZZ-type with EF-hand domain 1	0	1	0.743456
TET2	tet methylcytosine dioxygenase 2	0	2	0.741514
SETD7	SET domain containing (lysine methyltransferase) 7	1	2	0.739583
CELSR2	cadherin, EGF LAG seven-pass G-type receptor 2	0	1	0.739582
CORO2B	coronin, actin binding protein, 2B	0	1	0.739582
EPDR1	ependymin related 1	0	1	0.739582
FAM134C	family with sequence similarity 134, member C	0	1	0.739582
KIF5A	kinesin family member 5A	0	1	0.739582
L3MBTL3	l(3)mbt-like 3 (Drosophila)	0	1	0.739582
NPAT	nuclear protein, ataxia-telangiectasia locus	0	1	0.739582
PCMTD1	protein-L-isoaspartate (D-aspartate) O-methyltransferase domain containing 1	0	1	0.739582
RNF2	ring finger protein 2	0	1	0.739582
SPG20	spastic paraplegia 20 (Troyer syndrome)	0	1	0.739582
SUV420H1	suppressor of variegation 4-20 homolog 1 (Drosophila)	1	1	0.739582
SSH2	slingshot protein phosphatase 2	1	2	0.737663
ARAP2	ArfGAP with RhoGAP domain, ankyrin repeat and PH domain 2	1	1	0.735751
BCL11B	B-cell CLL/lymphoma 11B (zinc finger protein)	0	2	0.735751
GCC2	GRIP and coiled-coil domain containing 2	0	1	0.735751
GJA1	gap junction protein, alpha 1, 43kDa	2	1	0.735751
PCDH9	protocadherin 9	0	1	0.735751
TAPT1	transmembrane anterior posterior transformation 1	0	1	0.735751
TMEM64	transmembrane protein 64	0	1	0.735751
C2ORF69	chromosome 2 open reading frame 69	0	1	0.73196
DDHD1	DDHD domain containing 1	0	1	0.73196
SMAD5	SMAD family member 5	1	2	0.731959
AP1G1	adaptor-related protein complex 1, gamma 1 subunit	1	2	0.730078
CUX2	cut-like homeobox 2	0	1	0.728205
CYP1B1	cytochrome P450, family 1, subfamily B, polypeptide 1	3	1	0.728205
DYRK1A	dual-specificity tyrosine-(Y)-phosphorylation regulated kinase 1A	0	2	0.728205
HOXA1	homeobox A1	0	1	0.728205
ADAM11	ADAM metallopeptidase domain 11	0	1	0.724491
APBB2	amyloid beta (A4) precursor protein-binding, family B, member 2	0	1	0.724491
ATG5	autophagy related 5	3	1	0.724491
CADM2	cell adhesion molecule 2	0	1	0.724491
ETS2	v-ets avian erythroblastosis virus E26 oncogene homolog 2	1	1	0.724491
EZH1	enhancer of zeste homolog 1 (Drosophila)	0	1	0.724491
SCML2	sex comb on midleg-like 2 (Drosophila)	0	1	0.724491
SPRED2	sprouty-related, EVH1 domain containing 2	1	1	0.724491
ZNF800	zinc finger protein 800	0	1	0.724491
EIF4E3	eukaryotic translation initiation factor 4E family member 3	0	1	0.720812
KIAA1522	KIAA1522	0	1	0.720812
MAPK4	mitogen-activated protein kinase 4	1	1	0.720812
OSBPL2	oxysterol binding protein-like 2	0	1	0.720812
SPATA2	spermatogenesis associated 2	0	1	0.720812
TRIB2	tribbles pseudokinase 2	0	1	0.720812
ZRANB2	zinc finger, RAN-binding domain containing 2	0	1	0.720812
PLAG1	pleiomorphic adenoma gene 1	0	2	0.718987
GALC	galactosylceramidase	3	1	0.717172
GOLPH3L	golgi phosphoprotein 3-like	0	1	0.717172
LDLR	low density lipoprotein receptor	3	1	0.717172
WHSC1	Wolf-Hirschhorn syndrome candidate 1	1	2	0.717172
XKR6	XK, Kell blood group complex subunit-related family, member 6	0	1	0.717172
CEP170	centrosomal protein 170kDa	0	1	0.713567
RAVER2	ribonucleoprotein, PTB-binding 2	0	1	0.713567
SLC25A27	solute carrier family 25, member 27	0	1	0.713567
SYNE1	spectrin repeat containing, nuclear envelope 1	0	1	0.713567
GPM6B	glycoprotein M6B	0	1	0.71
KLF11	Kruppel-like factor 11	0	1	0.71
PELI1	pellino E3 ubiquitin protein ligase 1	0	1	0.71
SHANK3	SH3 and multiple ankyrin repeat domains 3	0	1	0.71
CRISPLD2	cysteine-rich secretory protein LCCL domain containing 2	0	1	0.706467
CTSS	cathepsin S	3	1	0.706467
EGLN3	egl-9 family hypoxia-inducible factor 3	2	1	0.706467
GNAI3	guanine nucleotide binding protein (G protein), alpha inhibiting activity polypeptide 3	11	1	0.706467
NBEA	neurobeachin	0	1	0.706467
PHC2	polyhomeotic homolog 2 (Drosophila)	0	1	0.706467
RPS6KA2	ribosomal protein S6 kinase, 90kDa, polypeptide 2	6	1	0.706467
SESN2	sestrin 2	1	1	0.70297
SHOC2	soc-2 suppressor of clear homolog (C. elegans)	0	1	0.70297
ZRANB1	zinc finger, RAN-binding domain containing 1	0	1	0.70297
CDC40	cell division cycle 40	1	1	0.699509
MBTD1	mbt domain containing 1	0	1	0.699509
SNF1LK		0	1	0.699509
C11ORF30	chromosome 11 open reading frame 30	0	1	0.696078
C5ORF41		0	1	0.696078
CASZ1	castor zinc finger 1	0	1	0.696078
CRY2	cryptochrome 2 (photolyase-like)	1	1	0.696078
EMR2	egf-like module containing, mucin-like, hormone receptor-like 2	0	2	0.696078
EYA1	eyes absent homolog 1 (Drosophila)	0	1	0.696078
HNF4G	hepatocyte nuclear factor 4, gamma	1	1	0.696078
JUB		0	1	0.696078
RASGEF1A	RasGEF domain family, member 1A	0	1	0.696078
RUFY2	RUN and FYVE domain containing 2	0	1	0.696078
SIRT1	sirtuin 1	0	1	0.696078
EPHA7	EPH receptor A7	1	1	0.692684
HLTF	helicase-like transcription factor	0	1	0.692684
POGZ	pogo transposable element with ZNF domain	0	1	0.692684
PPP2R3A	protein phosphatase 2, regulatory subunit B'', alpha	0	1	0.692684
ZIC4	Zic family member 4	0	1	0.692684
ACBD5	acyl-CoA binding domain containing 5	0	1	0.68932
ATPBD4		0	1	0.68932
GPR137C	G protein-coupled receptor 137C	0	1	0.68932
KPNA4	karyopherin alpha 4 (importin alpha 3)	0	1	0.68932
RND3	Rho family GTPase 3	0	1	0.68932
ZFYVE26	zinc finger, FYVE domain containing 26	0	1	0.68932
CNTN3	contactin 3 (plasmacytoma associated)	0	1	0.685991
FBN2	fibrillin 2	0	1	0.685991
HECA	headcase homolog (Drosophila)	0	1	0.685991
BMPR2	bone morphogenetic protein receptor, type II (serine/threonine kinase)	2	2	0.684337
TRPS1	trichorhinophalangeal syndrome I	0	2	0.684337
KCNQ5	potassium voltage-gated channel, KQT-like subfamily, member 5	0	1	0.682692
RAB18	RAB18, member RAS oncogene family	0	1	0.682692
RALA	v-ral simian leukemia viral oncogene homolog A (ras related)	2	1	0.682692
SEMA5A	sema domain, seven thrombospondin repeats (type 1 and type 1-like), transmembrane domain (TM) and short cytoplasmic domain, (semaphorin) 5A	1	1	0.682692
SGPP1	sphingosine-1-phosphate phosphatase 1	1	1	0.682692
SH3PXD2A	SH3 and PX domains 2A	0	2	0.682692
GRIA2	glutamate receptor, ionotropic, AMPA 2	4	1	0.679426
MYO1D	myosin ID	0	1	0.679426
SFRS2		1	1	0.679426
SLC41A1	solute carrier family 41 (magnesium transporter), member 1	0	1	0.679426
KCNA1	potassium voltage-gated channel, shaker-related subfamily, member 1 (episodic ataxia with myokymia)	0	2	0.677804
FAS	Fas cell surface death receptor	12	1	0.67619
RBM5	RNA binding motif protein 5	0	1	0.67619
C12ORF36	chromosome 12 open reading frame 36	0	1	0.672986
MARK1	MAP/microtubule affinity-regulating kinase 1	0	1	0.672986
NAT12		0	1	0.672986
PCNP	PEST proteolytic signal containing nuclear protein	0	1	0.672986
PHF2	PHD finger protein 2	0	1	0.672986
SAPS3		0	1	0.672986
UBAP2	ubiquitin associated protein 2	0	1	0.672986
VGLL4	vestigial like 4 (Drosophila)	0	1	0.672986
ZBTB7A	zinc finger and BTB domain containing 7A	0	1	0.672986
ADD3	adducin 3 (gamma)	0	1	0.66981
HP1BP3	heterochromatin protein 1, binding protein 3	0	1	0.66981
KSR1	kinase suppressor of ras 1	0	1	0.66981
MDFIC	MyoD family inhibitor domain containing	0	1	0.66981
PTPRO	protein tyrosine phosphatase, receptor type, O	0	1	0.66981
RAPGEFL1	Rap guanine nucleotide exchange factor (GEF)-like 1	0	1	0.66981
FAM60A	family with sequence similarity 60, member A	0	1	0.666667
OLA1	Obg-like ATPase 1	0	1	0.666667
PTBP2	polypyrimidine tract binding protein 2	0	1	0.666667
ZC3H7B	zinc finger CCCH-type containing 7B	0	1	0.666667
GOLGA1	golgin A1	0	1	0.663552
ZBTB6	zinc finger and BTB domain containing 6	0	1	0.663552
ZMYM4	zinc finger, MYM-type 4	0	1	0.663552
ANKRD50	ankyrin repeat domain 50	0	1	0.660465
FAM40B		0	1	0.660465
MAGI2	membrane associated guanylate kinase, WW and PDZ domain containing 2	1	1	0.660465
TAF9B	TAF9B RNA polymerase II, TATA box binding protein (TBP)-associated factor, 31kDa	1	1	0.660465
TNKS2	tankyrase, TRF1-interacting ankyrin-related ADP-ribose polymerase 2	0	1	0.660465
ZCCHC16	zinc finger, CCHC domain containing 16	0	1	0.660465
ARID4B	AT rich interactive domain 4B (RBP1-like)	0	1	0.657408
LMX1A	LIM homeobox transcription factor 1, alpha	0	1	0.657408
NEDD4L	neural precursor cell expressed, developmentally down-regulated 4-like, E3 ubiquitin protein ligase	3	1	0.657408
OGT	O-linked N-acetylglucosamine (GlcNAc) transferase	0	1	0.657408
PRKAR2A	protein kinase, cAMP-dependent, regulatory, type II, alpha	2	1	0.657408
SFXN5	sideroflexin 5	0	1	0.657408
TMEM50B	transmembrane protein 50B	0	1	0.657408
ZC3H6	zinc finger CCCH-type containing 6	0	2	0.657407
ASPH	aspartate beta-hydroxylase	0	1	0.654377
CCDC25	coiled-coil domain containing 25	0	1	0.654377
IQSEC2	IQ motif and Sec7 domain 2	1	1	0.654377
NEK9	NIMA-related kinase 9	0	1	0.654377
SLC30A10	solute carrier family 30, member 10	0	1	0.654377
ARID4A	AT rich interactive domain 4A (RBP1-like)	0	1	0.651377
ATF3	activating transcription factor 3	0	1	0.651377
ATP1A2	ATPase, Na+/K+ transporting, alpha 2 polypeptide	8	1	0.651377
DMTF1	cyclin D binding myb-like transcription factor 1	0	1	0.651377
SNX21	sorting nexin family member 21	0	1	0.651377
STK38	serine/threonine kinase 38	0	1	0.651377
TCF7	transcription factor 7 (T-cell specific, HMG-box)	11	1	0.651377
TIMP2	TIMP metallopeptidase inhibitor 2	0	1	0.651377
TNFRSF10B	tumor necrosis factor receptor superfamily, member 10b	4	1	0.651377
CAMKK1	calcium/calmodulin-dependent protein kinase kinase 1, alpha	1	1	0.648401
CDC25A	cell division cycle 25A	2	1	0.648401
FOXP4	forkhead box P4	0	1	0.648401
SNX16	sorting nexin 16	0	1	0.648401
BRWD1	bromodomain and WD repeat domain containing 1	0	2	0.646925
EIF2S1	eukaryotic translation initiation factor 2, subunit 1 alpha, 35kDa	3	1	0.645455
KIAA0892		0	1	0.645455
SGTB	small glutamine-rich tetratricopeptide repeat (TPR)-containing, beta	0	1	0.645455
SP8	Sp8 transcription factor	0	1	0.645455
SSR1	signal sequence receptor, alpha	1	1	0.645455
CD164	CD164 molecule, sialomucin	1	1	0.642533
GPM6A	glycoprotein M6A	0	1	0.642533
MAPRE1	microtubule-associated protein, RP/EB family, member 1	0	1	0.642533
NRSN1	neurensin 1	0	1	0.642533
PFKFB3	6-phosphofructo-2-kinase/fructose-2,6-biphosphatase 3	1	1	0.642533
UBE2R2	ubiquitin-conjugating enzyme E2R 2	1	1	0.642533
WDR35	WD repeat domain 35	0	1	0.642533
ALDH3B1	aldehyde dehydrogenase 3 family, member B1	7	1	0.63964
GABRE	gamma-aminobutyric acid (GABA) A receptor, epsilon	1	1	0.63964
NLGN4X	neuroligin 4, X-linked	1	1	0.63964
OBFC2A		0	1	0.63964
UBE3A	ubiquitin protein ligase E3A	1	1	0.63964
WASF2	WAS protein family, member 2	5	1	0.63964
CASP8	caspase 8, apoptosis-related cysteine peptidase	11	1	0.63677
GTDC1	glycosyltransferase-like domain containing 1	0	1	0.63677
SRPK1	SRSF protein kinase 1	0	1	0.63677
ARHGAP12	Rho GTPase activating protein 12	0	1	0.633928
AZIN1	antizyme inhibitor 1	0	1	0.633928
C1ORF9		0	1	0.633928
NLK	nemo-like kinase	3	1	0.633928
PXDN	peroxidasin homolog (Drosophila)	0	1	0.633928
RRAGD	Ras-related GTP binding D	0	1	0.633928
SBK1	SH3 domain binding kinase 1	0	1	0.633928
TWF1	twinfilin actin-binding protein 1	0	1	0.633928
CLDN12	claudin 12	0	1	0.631112
METAP1	methionyl aminopeptidase 1	0	1	0.631112
SUPT7L	suppressor of Ty 7 (S. cerevisiae)-like	0	1	0.631112
TXLNA	taxilin alpha	0	1	0.631112
BCR	breakpoint cluster region	2	1	0.628318
FAM8A1	family with sequence similarity 8, member A1	0	1	0.628318
PLXNA1	plexin A1	1	1	0.628318
VAPB	VAMP (vesicle-associated membrane protein)-associated protein B and C	0	1	0.628318
EEA1	early endosome antigen 1	2	1	0.625551
FCHO2	FCH domain only 2	0	1	0.625551
INSIG1	insulin induced gene 1	0	1	0.625551
MAP3K14	mitogen-activated protein kinase kinase kinase 14	5	1	0.625551
PPP1R3B	protein phosphatase 1, regulatory subunit 3B	1	1	0.625551
SFRS12		0	1	0.625551
SNX9	sorting nexin 9	0	1	0.625551
AGFG2	ArfGAP with FG repeats 2	0	1	0.622807
C2ORF71	chromosome 2 open reading frame 71	0	1	0.622807
CPNE8	copine VIII	0	1	0.622807
KAT2B	K(lysine) acetyltransferase 2B	1	1	0.622807
MAP3K9	mitogen-activated protein kinase kinase kinase 9	1	1	0.622807
WASF3	WAS protein family, member 3	2	1	0.622807
PSD3	pleckstrin and Sec7 domain containing 3	1	2	0.621444
DCUN1D1	DCN1, defective in cullin neddylation 1, domain containing 1	0	1	0.620088
FAM126B	family with sequence similarity 126, member B	0	1	0.620088
LASP1	LIM and SH3 protein 1	0	1	0.620088
MARK4	MAP/microtubule affinity-regulating kinase 4	0	1	0.620088
SCN1A	sodium channel, voltage-gated, type I, alpha subunit	0	1	0.620088
ARRDC4	arrestin domain containing 4	0	1	0.617391
CADM1	cell adhesion molecule 1	1	1	0.617391
MGEA5	meningioma expressed antigen 5 (hyaluronidase)	0	1	0.617391
PDGFD	platelet derived growth factor D	6	1	0.617391
RGMB	RGM domain family, member B	0	1	0.617391
THBS1	thrombospondin 1	7	1	0.617391
TNFAIP1	tumor necrosis factor, alpha-induced protein 1 (endothelial)	0	1	0.617391
ZNF512B	zinc finger protein 512B	0	1	0.617391
ARL4A	ADP-ribosylation factor-like 4A	0	1	0.614719
KIF16B	kinesin family member 16B	0	1	0.614719
PKD1	polycystic kidney disease 1 (autosomal dominant)	0	1	0.614719
SLC22A23	solute carrier family 22, member 23	0	1	0.614719
TSPAN9	tetraspanin 9	0	1	0.614719
EPAS1	endothelial PAS domain protein 1	2	1	0.612068
MAPK14	mitogen-activated protein kinase 14	18	1	0.612068
PFN2	profilin 2	2	1	0.612068
DCUN1D3	DCN1, defective in cullin neddylation 1, domain containing 3	0	1	0.609442
FBXO21	F-box protein 21	0	1	0.609442
MAGI3	membrane associated guanylate kinase, WW and PDZ domain containing 3	1	1	0.609442
MCF2L	MCF.2 cell line derived transforming sequence-like	0	1	0.609442
SLC12A5	solute carrier family 12 (potassium/chloride transporter), member 5	0	1	0.609442
TNRC6A	trinucleotide repeat containing 6A	0	1	0.609442
XRRA1	X-ray radiation resistance associated 1	0	1	0.609442
AP2B1	adaptor-related protein complex 2, beta 1 subunit	2	1	0.606838
APAF1	apoptotic peptidase activating factor 1	7	1	0.606838
BAHD1	bromo adjacent homology domain containing 1	0	1	0.606838
GRHL2	grainyhead-like 2 (Drosophila)	0	1	0.606838
SLC24A3	solute carrier family 24 (sodium/potassium/calcium exchanger), member 3	0	1	0.606838
VEGFA	vascular endothelial growth factor A	8	1	0.606838
ADAM9	ADAM metallopeptidase domain 9	0	1	0.604255
HEG1	heart development protein with EGF-like domains 1	0	1	0.604255
MKRN1	makorin ring finger protein 1	0	1	0.604255
ANKRD57		0	1	0.601696
FAM102A	family with sequence similarity 102, member A	0	1	0.601696
MSR1	macrophage scavenger receptor 1	1	1	0.601696
MYEF2	myelin expression factor 2	0	1	0.601696
SCARB2	scavenger receptor class B, member 2	1	1	0.601696
THAP2	THAP domain containing, apoptosis associated protein 2	0	1	0.601696
VEZT	vezatin, adherens junctions transmembrane protein	0	1	0.601696
DPY19L3	dpy-19-like 3 (C. elegans)	0	1	0.599156
FMR1	fragile X mental retardation 1	0	1	0.599156
MSL2	male-specific lethal 2 homolog (Drosophila)	0	1	0.599156
NRCAM	neuronal cell adhesion molecule	1	1	0.599156
STIM2	stromal interaction molecule 2	0	1	0.599156
UBE2B	ubiquitin-conjugating enzyme E2B	1	1	0.599156
ZBTB44	zinc finger and BTB domain containing 44	0	1	0.599156
ZNF295		0	1	0.599156
ABCG4	ATP-binding cassette, sub-family G (WHITE), member 4	1	1	0.596639
CDV3	CDV3 homolog (mouse)	0	1	0.596639
ITPKB	inositol-trisphosphate 3-kinase B	4	1	0.596639
MIA3	melanoma inhibitory activity family, member 3	0	1	0.596639
MSL1	male-specific lethal 1 homolog (Drosophila)	0	1	0.596639
PPP1R1C	protein phosphatase 1, regulatory (inhibitor) subunit 1C	0	1	0.596639
RAP2C	RAP2C, member of RAS oncogene family	0	1	0.596639
RBM24	RNA binding motif protein 24	0	1	0.596639
SSX2IP	synovial sarcoma, X breakpoint 2 interacting protein	1	1	0.596639
CCND1	cyclin D1	19	1	0.594142
GABPB2	GA binding protein transcription factor, beta subunit 2	0	1	0.594142
HMGB3	high mobility group box 3	0	1	0.594142
JOSD1	Josephin domain containing 1	0	1	0.594142
NAP1L1	nucleosome assembly protein 1-like 1	0	1	0.594142
STK24	serine/threonine kinase 24	0	1	0.594142
TMEM123	transmembrane protein 123	0	1	0.594142
ZNF398	zinc finger protein 398	0	1	0.594142
NAPEPLD	N-acyl phosphatidylethanolamine phospholipase D	0	1	0.591667
OXSR1	oxidative stress responsive 1	0	1	0.591667
PARD6B	par-6 family cell polarity regulator beta	2	1	0.591667
ADIPOR2	adiponectin receptor 2	1	1	0.589211
AGFG1	ArfGAP with FG repeats 1	0	1	0.589211
ARHGEF3	Rho guanine nucleotide exchange factor (GEF) 3	0	1	0.589211
FBXW11	F-box and WD repeat domain containing 11	6	1	0.589211
FUBP3	far upstream element (FUSE) binding protein 3	0	1	0.589211
MMP24	matrix metallopeptidase 24 (membrane-inserted)	0	1	0.589211
RAPGEF2	Rap guanine nucleotide exchange factor (GEF) 2	1	1	0.589211
RECK	reversion-inducing-cysteine-rich protein with kazal motifs	0	1	0.589211
CLEC16A	C-type lectin domain family 16, member A	0	1	0.586777
CMPK1	cytidine monophosphate (UMP-CMP) kinase 1, cytosolic	2	1	0.586777
COL12A1	collagen, type XII, alpha 1	1	1	0.586777
CREM	cAMP responsive element modulator	0	1	0.586777
KIAA1737	KIAA1737	0	1	0.586777
NPLOC4	nuclear protein localization 4 homolog (S. cerevisiae)	1	1	0.586777
NR1D2	nuclear receptor subfamily 1, group D, member 2	0	1	0.586777
PAPOLA	poly(A) polymerase alpha	1	1	0.586777
ZBTB33	zinc finger and BTB domain containing 33	0	1	0.586777
ZBTB47	zinc finger and BTB domain containing 47	0	1	0.586777
ADAT2	adenosine deaminase, tRNA-specific 2	0	1	0.584361
DLC1	deleted in liver cancer 1	0	1	0.584361
INTS6	integrator complex subunit 6	0	1	0.584361
VPS13C	vacuolar protein sorting 13 homolog C (S. cerevisiae)	0	1	0.584361
WNK3	WNK lysine deficient protein kinase 3	0	1	0.584361
C6ORF134		0	1	0.581967
MTERFD2	MTERF domain containing 2	0	1	0.581967
TMEM154	transmembrane protein 154	0	1	0.581967
GPR158	G protein-coupled receptor 158	0	1	0.579593
MAL2	mal, T-cell differentiation protein 2 (gene/pseudogene)	0	1	0.579593
PDS5A	PDS5, regulator of cohesion maintenance, homolog A (S. cerevisiae)	0	1	0.579593
REEP3	receptor accessory protein 3	0	1	0.579593
TOX	thymocyte selection-associated high mobility group box	0	1	0.579593
YPEL1	yippee-like 1 (Drosophila)	0	1	0.579593
DACH1	dachshund homolog 1 (Drosophila)	0	1	0.577236
DOCK4	dedicator of cytokinesis 4	0	1	0.577236
SLC9A2	solute carrier family 9, subfamily A (NHE2, cation proton antiporter 2), member 2	0	1	0.577236
TRAPPC10	trafficking protein particle complex 10	0	1	0.577236
ALDH5A1	aldehyde dehydrogenase 5 family, member A1	3	1	0.574899
ASXL1	additional sex combs like 1 (Drosophila)	0	1	0.574899
SLC16A2	solute carrier family 16, member 2 (thyroid hormone transporter)	0	1	0.574899
SLC24A4	solute carrier family 24 (sodium/potassium/calcium exchanger), member 4	0	1	0.574899
SS18L1	synovial sarcoma translocation gene on chromosome 18-like 1	0	1	0.574899
SULF1	sulfatase 1	0	1	0.574899
TXNDC10		0	1	0.574899
VASH1	vasohibin 1	0	1	0.574899
WASL	Wiskott-Aldrich syndrome-like	7	1	0.574899
MLL		0	2	0.573737
FGF7	fibroblast growth factor 7	4	1	0.57258
PIP4K2C	phosphatidylinositol-5-phosphate 4-kinase, type II, gamma	3	1	0.57258
TGFBR2	transforming growth factor, beta receptor II (70/80kDa)	10	1	0.57258
ZNF704	zinc finger protein 704	0	1	0.57258
LIF	leukemia inhibitory factor	2	1	0.570282
NFYB	nuclear transcription factor Y, beta	1	1	0.570282
NR4A2	nuclear receptor subfamily 4, group A, member 2	0	1	0.570282
PTEN	phosphatase and tensin homolog	11	1	0.570282
RAB10	RAB10, member RAS oncogene family	0	1	0.570282
SOBP	sine oculis binding protein homolog (Drosophila)	0	1	0.570282
C17ORF39		0	1	0.567999
C7ORF60	chromosome 7 open reading frame 60	0	1	0.567999
FAM160B1	family with sequence similarity 160, member B1	0	1	0.567999
RGL1	ral guanine nucleotide dissociation stimulator-like 1	0	1	0.567999
SERP1	stress-associated endoplasmic reticulum protein 1	0	1	0.567999
NCOA3	nuclear receptor coactivator 3	0	1	0.565737
CASC4	cancer susceptibility candidate 4	0	1	0.563491
ERBB2IP	erbb2 interacting protein	1	1	0.563491
ODZ1		0	1	0.563491
ADAR	adenosine deaminase, RNA-specific	1	1	0.561265
DYRK2	dual-specificity tyrosine-(Y)-phosphorylation regulated kinase 2	0	1	0.561265
GNS	glucosamine (N-acetyl)-6-sulfatase	3	1	0.561265
LYSMD3	LysM, putative peptidoglycan-binding, domain containing 3	0	1	0.561265
MID1	midline 1 (Opitz/BBB syndrome)	1	1	0.561265
RAB5B	RAB5B, member RAS oncogene family	4	1	0.561265
SDC2	syndecan 2	3	1	0.561265
YWHAG	tyrosine 3-monooxygenase/tryptophan 5-monooxygenase activation protein, gamma polypeptide	3	1	0.561265
ZBTB5	zinc finger and BTB domain containing 5	0	1	0.561265
ARNT	aryl hydrocarbon receptor nuclear translocator	2	1	0.559056
ASH1L	ash1 (absent, small, or homeotic)-like (Drosophila)	2	1	0.559056
CLOCK	clock circadian regulator	1	1	0.559056
PHTF2	putative homeodomain transcription factor 2	0	1	0.559056
SPOPL	speckle-type POZ protein-like	0	1	0.559056
THRA	thyroid hormone receptor, alpha	1	1	0.559056
ACVR1B	activin A receptor, type IB	1	1	0.556863
LMO3	LIM domain only 3 (rhombotin-like 2)	0	1	0.556863
MPZL1	myelin protein zero-like 1	1	1	0.556863
PAFAH1B2	platelet-activating factor acetylhydrolase 1b, catalytic subunit 2 (30kDa)	2	1	0.556863
BNC2	basonuclin 2	0	2	0.555773
CBFB	core-binding factor, beta subunit	0	1	0.554688
CRIM1	cysteine rich transmembrane BMP regulator 1 (chordin-like)	0	1	0.554688
MXI1	MAX interactor 1, dimerization protein	0	1	0.554688
NRK	Nik related kinase	0	1	0.554688
SLC39A10	solute carrier family 39 (zinc transporter), member 10	0	1	0.554688
STAT3	signal transducer and activator of transcription 3 (acute-phase response factor)	8	1	0.554688
NFAT5	nuclear factor of activated T-cells 5, tonicity-responsive	6	2	0.554687
CDK5R1	cyclin-dependent kinase 5, regulatory subunit 1 (p35)	1	1	0.552529
CRTC3	CREB regulated transcription coactivator 3	0	1	0.552529
DDX3Y	DEAD (Asp-Glu-Ala-Asp) box helicase 3, Y-linked	1	1	0.552529
DENND5B	DENN/MADD domain containing 5B	0	1	0.552529
EREG	epiregulin	1	1	0.552529
HS3ST3B1	heparan sulfate (glucosamine) 3-O-sulfotransferase 3B1	1	1	0.550388
DNAJC16	DnaJ (Hsp40) homolog, subfamily C, member 16	0	1	0.548262
FUSIP1		0	1	0.548262
HAS3	hyaluronan synthase 3	0	1	0.548262
ADCY2	adenylate cyclase 2 (brain)	13	1	0.546154
LDLRAD3	low density lipoprotein receptor class A domain containing 3	0	1	0.546154
SIRPA	signal-regulatory protein alpha	0	1	0.546154
SLC2A13	solute carrier family 2 (facilitated glucose transporter), member 13	0	1	0.546154
ZBTB4	zinc finger and BTB domain containing 4	0	1	0.546154
ZNF654	zinc finger protein 654	0	1	0.546154
ADAMTSL1	ADAMTS-like 1	0	1	0.544061
ATG2B	autophagy related 2B	0	1	0.544061
BAZ2A	bromodomain adjacent to zinc finger domain, 2A	0	1	0.544061
CNOT4	CCR4-NOT transcription complex, subunit 4	1	1	0.544061
FEM1C	fem-1 homolog c (C. elegans)	0	1	0.544061
USP46	ubiquitin specific peptidase 46	0	1	0.544061
CANX	calnexin	3	1	0.541985
IRF2BP2	interferon regulatory factor 2 binding protein 2	0	1	0.541985
ITPR2	inositol 1,4,5-trisphosphate receptor, type 2	12	1	0.541985
KPNA3	karyopherin alpha 3 (importin alpha 4)	0	1	0.541985
NOVA1	neuro-oncological ventral antigen 1	0	1	0.541985
SYTL4	synaptotagmin-like 4	0	1	0.541985
YES1	v-yes-1 Yamaguchi sarcoma viral oncogene homolog 1	2	1	0.541985
SLC1A2	solute carrier family 1 (glial high affinity glutamate transporter), member 2	1	2	0.540952
CTNND1	catenin (cadherin-associated protein), delta 1	2	1	0.539923
GIGYF1	GRB10 interacting GYF protein 1	0	1	0.539923
GIT2	G protein-coupled receptor kinase interacting ArfGAP 2	1	1	0.539923
MEF2A	myocyte enhancer factor 2A	0	1	0.539923
SASH1	SAM and SH3 domain containing 1	0	1	0.539923
VASH2	vasohibin 2	0	1	0.539923
RNF144B	ring finger protein 144B	0	1	0.537879
ZNF238		0	1	0.537879
DPYSL2	dihydropyrimidinase-like 2	1	1	0.53585
FOXN2	forkhead box N2	0	1	0.53585
LHX6	LIM homeobox 6	0	1	0.53585
ANKRD12	ankyrin repeat domain 12	0	1	0.533834
GNG12	guanine nucleotide binding protein (G protein), gamma 12	3	1	0.533834
MOBKL2B		0	1	0.533834
NPAS3	neuronal PAS domain protein 3	0	1	0.533834
TBL1X	transducin (beta)-like 1X-linked	1	1	0.533834
TLE4	transducin-like enhancer of split 4 (E(sp1) homolog, Drosophila)	0	1	0.533834
TTC9	tetratricopeptide repeat domain 9	0	1	0.533834
CAMSAP1L1		0	1	0.531836
FAR1	fatty acyl CoA reductase 1	1	1	0.531836
RND2	Rho family GTPase 2	0	1	0.531836
CCNT2	cyclin T2	0	1	0.52985
PHACTR2	phosphatase and actin regulator 2	0	1	0.52985
ST6GAL1	ST6 beta-galactosamide alpha-2,6-sialyltranferase 1	2	1	0.52985
BDNF	brain-derived neurotrophic factor	3	1	0.527881
POU3F2	POU class 3 homeobox 2	0	1	0.527881
RAD23B	RAD23 homolog B (S. cerevisiae)	2	1	0.527881
ACSL4	acyl-CoA synthetase long-chain family member 4	5	1	0.525926
KIAA0831		0	1	0.525926
MAP3K2	mitogen-activated protein kinase kinase kinase 2	3	1	0.525926
WWC2	WW and C2 domain containing 2	0	1	0.525926
ZFYVE20	zinc finger, FYVE domain containing 20	1	1	0.525926
MAP3K1	mitogen-activated protein kinase kinase kinase 1, E3 ubiquitin protein ligase	5	1	0.523985
PRKACB	protein kinase, cAMP-dependent, catalytic, beta	23	1	0.523985
TMEM127	transmembrane protein 127	0	1	0.523985
ZNF280B	zinc finger protein 280B	0	1	0.523985
ANO6	anoctamin 6	0	1	0.522058
COL4A3	collagen, type IV, alpha 3 (Goodpasture antigen)	0	1	0.522058
FYCO1	FYVE and coiled-coil domain containing 1	0	1	0.522058
KCNJ10	potassium inwardly-rectifying channel, subfamily J, member 10	1	1	0.522058
KIAA0226	KIAA0226	0	1	0.522058
RGS7BP	regulator of G-protein signaling 7 binding protein	0	1	0.522058
KLF9	Kruppel-like factor 9	0	1	0.520147
LAMC1	laminin, gamma 1 (formerly LAMB2)	7	1	0.520147
MYT1L	myelin transcription factor 1-like	0	1	0.520147
ZNF436	zinc finger protein 436	0	1	0.520147
CAMK2D	calcium/calmodulin-dependent protein kinase II delta	11	1	0.518249
GLCCI1	glucocorticoid induced transcript 1	0	1	0.518249
PCYT1B	phosphate cytidylyltransferase 1, choline, beta	2	1	0.518249
CHD9	chromodomain helicase DNA binding protein 9	0	1	0.516364
CREBZF	CREB/ATF bZIP transcription factor	0	1	0.516364
LIN54	lin-54 homolog (C. elegans)	0	1	0.516364
PDLIM5	PDZ and LIM domain 5	0	1	0.516364
STX6	syntaxin 6	1	1	0.516364
WDFY1	WD repeat and FYVE domain containing 1	0	1	0.516364
FAM155B	family with sequence similarity 155, member B	0	1	0.514493
IPO5	importin 5	0	1	0.514493
ZNF333	zinc finger protein 333	0	1	0.514493
ARHGEF7	Rho guanine nucleotide exchange factor (GEF) 7	1	1	0.512635
C16ORF72	chromosome 16 open reading frame 72	0	1	0.512635
ITGB3	integrin, beta 3 (platelet glycoprotein IIIa, antigen CD61)	8	1	0.512635
MAP3K3	mitogen-activated protein kinase kinase kinase 3	3	1	0.512635
PVRL1	poliovirus receptor-related 1 (herpesvirus entry mediator C)	2	1	0.512635
ALX4	ALX homeobox 4	0	1	0.510792
CFL2	cofilin 2 (muscle)	3	1	0.510792
CHIC1	cysteine-rich hydrophobic domain 1	0	1	0.510792
ETV1	ets variant 1	0	1	0.510792
ITCH	itchy E3 ubiquitin protein ligase	2	1	0.510792
RBM12	RNA binding motif protein 12	0	1	0.510792
CCNJ	cyclin J	0	1	0.50896
FAM116A		0	1	0.50896
PTGFRN	prostaglandin F2 receptor inhibitor	0	1	0.50896
TSC22D3	TSC22 domain family, member 3	0	1	0.50896
CRAMP1L	Crm, cramped-like (Drosophila)	0	1	0.507143
DICER1	dicer 1, ribonuclease type III	0	1	0.507143
GRB10	growth factor receptor-bound protein 10	0	1	0.507143
MCL1	myeloid cell leukemia sequence 1 (BCL2-related)	0	1	0.507143
PKNOX1	PBX/knotted 1 homeobox 1	0	1	0.507143
YTHDF3	YTH domain family, member 3	0	1	0.507143
CDC14B	cell division cycle 14B	1	1	0.503546
DCLK1	doublecortin-like kinase 1	0	1	0.503546
PPP2R5C	protein phosphatase 2, regulatory subunit B', gamma	2	1	0.503546
PALLD	palladin, cytoskeletal associated protein	0	1	0.501766
TAL1	T-cell acute lymphocytic leukemia 1	0	1	0.501766
CYBRD1	cytochrome b reductase 1	0	1	0.5
FBXO41	F-box protein 41	0	1	0.5
FOXJ2	forkhead box J2	0	1	0.5
RABGAP1	RAB GTPase activating protein 1	0	1	0.5
SCAMP5	secretory carrier membrane protein 5	0	1	0.5
USP24	ubiquitin specific peptidase 24	0	1	0.5
CCDC88A	coiled-coil domain containing 88A	0	1	0.498246
CDC2L6		0	1	0.498246
DNAJC27	DnaJ (Hsp40) homolog, subfamily C, member 27	0	1	0.498246
USP31	ubiquitin specific peptidase 31	0	1	0.498246
CALD1	caldesmon 1	1	1	0.496503
MEIS1	Meis homeobox 1	0	1	0.496503
RAB11FIP1	RAB11 family interacting protein 1 (class I)	1	1	0.496503
ST7L	suppression of tumorigenicity 7 like	0	1	0.496503
ACVR2A	activin A receptor, type IIA	2	1	0.494774
BCL7A	B-cell CLL/lymphoma 7A	0	1	0.494774
PITPNA	phosphatidylinositol transfer protein, alpha	0	1	0.494774
WDR82	WD repeat domain 82	0	1	0.494774
EGR3	early growth response 3	0	1	0.493055
GLIS3	GLIS family zinc finger 3	0	1	0.493055
TGOLN2	trans-golgi network protein 2	0	1	0.493055
OCRL	oculocerebrorenal syndrome of Lowe	3	1	0.49135
ZNF148	zinc finger protein 148	0	1	0.489655
ZNF236	zinc finger protein 236	0	1	0.489655
E2F2	E2F transcription factor 2	10	1	0.487973
KIAA0240		0	1	0.487973
SSFA2	sperm specific antigen 2	0	1	0.487973
TTC39A	tetratricopeptide repeat domain 39A	0	1	0.487973
TTPAL	tocopherol (alpha) transfer protein-like	0	1	0.487973
ZCCHC24	zinc finger, CCHC domain containing 24	0	1	0.487973
ABCA1	ATP-binding cassette, sub-family A (ABC1), member 1	1	1	0.486301
EPB41L5	erythrocyte membrane protein band 4.1 like 5	0	1	0.486301
IHPK1		0	1	0.486301
KLHL28	kelch-like family member 28	0	1	0.484642
ZNF655	zinc finger protein 655	0	1	0.484642
CDC42SE2	CDC42 small effector 2	0	1	0.482994
CYCS	cytochrome c, somatic	11	1	0.482994
SOCS6	suppressor of cytokine signaling 6	0	1	0.482994
ARL4C	ADP-ribosylation factor-like 4C	0	1	0.481356
KIAA1128		0	1	0.481356
LRRC55	leucine rich repeat containing 55	0	1	0.481356
VLDLR	very low density lipoprotein receptor	0	1	0.481356
ZYG11B	zyg-11 family member B, cell cycle regulator	0	1	0.47973
FGF5	fibroblast growth factor 5	4	1	0.478114
FRMD6	FERM domain containing 6	0	1	0.478114
NAV2	neuron navigator 2	0	1	0.478114
CEP97	centrosomal protein 97kDa	0	1	0.47651
NSUN4	NOP2/Sun domain family, member 4	0	1	0.47651
REEP1	receptor accessory protein 1	0	1	0.47651
AKAP9	A kinase (PRKA) anchor protein 9	0	1	0.474916
EPHA4	EPH receptor A4	1	1	0.474916
LYPD6	LY6/PLAUR domain containing 6	0	1	0.474916
PHF17		0	1	0.474916
SPTBN1	spectrin, beta, non-erythrocytic 1	0	1	0.474916
ANKRD28	ankyrin repeat domain 28	0	1	0.473334
CD28	CD28 molecule	9	1	0.47176
PRPF4B	pre-mRNA processing factor 4B	0	1	0.47176
FAM178A	family with sequence similarity 178, member A	0	1	0.468646
MAP2	microtubule-associated protein 2	0	1	0.468646
PKN2	protein kinase N2	0	1	0.468646
ABL2	c-abl oncogene 2, non-receptor tyrosine kinase	2	1	0.467105
OSBPL3	oxysterol binding protein-like 3	0	1	0.467105
PLDN		0	1	0.467105
SEMA4G	sema domain, immunoglobulin domain (Ig), transmembrane domain (TM) and short cytoplasmic domain, (semaphorin) 4G	1	1	0.467105
TLL1	tolloid-like 1	0	1	0.467105
CD93	CD93 molecule	0	1	0.465574
KCNK2	potassium channel, subfamily K, member 2	1	1	0.465574
LPGAT1	lysophosphatidylglycerol acyltransferase 1	1	1	0.465574
RTF1	Rtf1, Paf1/RNA polymerase II complex component, homolog (S. cerevisiae)	0	1	0.465574
ANK2	ankyrin 2, neuronal	0	1	0.464052
ATAD2B	ATPase family, AAA domain containing 2B	0	1	0.464052
LIN7C	lin-7 homolog C (C. elegans)	0	1	0.464052
ADAM22	ADAM metallopeptidase domain 22	0	1	0.462541
CREBL2	cAMP responsive element binding protein-like 2	0	1	0.462541
KREMEN1	kringle containing transmembrane protein 1	0	1	0.462541
CDON	cell adhesion associated, oncogene regulated	0	1	0.461039
KIF5C	kinesin family member 5C	0	1	0.461039
SPTY2D1	SPT2, Suppressor of Ty, domain containing 1 (S. cerevisiae)	0	1	0.461039
SPATS2	spermatogenesis associated, serine-rich 2	0	1	0.459547
ACAP2	ArfGAP with coiled-coil, ankyrin repeat and PH domains 2	1	1	0.458064
SOX12	SRY (sex determining region Y)-box 12	0	1	0.458064
USP47	ubiquitin specific peptidase 47	0	1	0.458064
YAF2	YY1 associated factor 2	0	1	0.456592
C5ORF24	chromosome 5 open reading frame 24	0	1	0.455128
DIP2B	DIP2 disco-interacting protein 2 homolog B (Drosophila)	0	1	0.455128
TFEC	transcription factor EC	0	1	0.455128
UBE2W	ubiquitin-conjugating enzyme E2W (putative)	1	1	0.455128
ANKFY1	ankyrin repeat and FYVE domain containing 1	0	1	0.453674
CUL3	cullin 3	1	1	0.453674
SLC30A7	solute carrier family 30 (zinc transporter), member 7	0	1	0.453674
SPRY4	sprouty homolog 4 (Drosophila)	1	1	0.453674
USP37	ubiquitin specific peptidase 37	0	1	0.453674
LYRM2	LYR motif containing 2	0	1	0.452229
TP53INP2	tumor protein p53 inducible nuclear protein 2	0	1	0.452229
WIPF2	WAS/WASL interacting protein family, member 2	0	1	0.452229
AMMECR1L	AMMECR1-like	0	1	0.450794
CPM	carboxypeptidase M	0	1	0.450794
NIN	ninein (GSK3B interacting protein)	0	1	0.450794
ZFHX3	zinc finger homeobox 3	0	1	0.450794
RAPGEF5	Rap guanine nucleotide exchange factor (GEF) 5	0	1	0.449368
EPB41	erythrocyte membrane protein band 4.1 (elliptocytosis 1, RH-linked)	1	1	0.447949
NDST1	N-deacetylase/N-sulfotransferase (heparan glucosaminyl) 1	2	1	0.447949
SLC35F1	solute carrier family 35, member F1	0	1	0.447949
FAM84B	family with sequence similarity 84, member B	0	1	0.446541
MRPS25	mitochondrial ribosomal protein S25	0	1	0.446541
RASSF2	Ras association (RalGDS/AF-6) domain family member 2	0	1	0.446541
TMEM132B	transmembrane protein 132B	0	1	0.446541
AKAP11	A kinase (PRKA) anchor protein 11	0	1	0.445141
KIF3B	kinesin family member 3B	0	1	0.445141
PAK2	p21 protein (Cdc42/Rac)-activated kinase 2	7	1	0.445141
PHF8	PHD finger protein 8	0	1	0.445141
PRRX1	paired related homeobox 1	0	1	0.445141
SERBP1	SERPINE1 mRNA binding protein 1	0	1	0.445141
MFAP3L	microfibrillar-associated protein 3-like	0	1	0.44375
PHF6	PHD finger protein 6	0	1	0.44375
SCN2B	sodium channel, voltage-gated, type II, beta subunit	0	1	0.44375
ATP2B1	ATPase, Ca++ transporting, plasma membrane 1	3	1	0.442367
MAPK1	mitogen-activated protein kinase 1	50	1	0.442367
KIAA1462	KIAA1462	0	1	0.440994
RANBP10	RAN binding protein 10	0	1	0.440994
ADAMTS6	ADAM metallopeptidase with thrombospondin type 1 motif, 6	0	1	0.439628
GNG2	guanine nucleotide binding protein (G protein), gamma 2	1	1	0.439628
RSBN1	round spermatid basic protein 1	0	1	0.439628
SLC30A8	solute carrier family 30 (zinc transporter), member 8	0	1	0.439628
PLCB1	phospholipase C, beta 1 (phosphoinositide-specific)	19	1	0.438272
DIXDC1	DIX domain containing 1	0	1	0.436924
XRN1	5'-3' exoribonuclease 1	1	1	0.436924
CXCL12	chemokine (C-X-C motif) ligand 12	5	1	0.435583
FAM117B	family with sequence similarity 117, member B	0	1	0.435583
MIER3	mesoderm induction early response 1, family member 3	0	1	0.435583
ABCC5	ATP-binding cassette, sub-family C (CFTR/MRP), member 5	1	1	0.434251
CAPRIN1	cell cycle associated protein 1	0	1	0.434251
USP9X	ubiquitin specific peptidase 9, X-linked	0	1	0.434251
TIMP3	TIMP metallopeptidase inhibitor 3	0	1	0.432927
CPEB2	cytoplasmic polyadenylation element binding protein 2	0	1	0.431611
FRMD4A	FERM domain containing 4A	0	1	0.431611
RNF144A	ring finger protein 144A	0	1	0.431611
RYBP	RING1 and YY1 binding protein	0	1	0.431611
SEC62	SEC62 homolog (S. cerevisiae)	2	1	0.431611
PTPRE	protein tyrosine phosphatase, receptor type, E	0	1	0.430303
PIP5K3		4	1	0.429003
AKT3	v-akt murine thymoma viral oncogene homolog 3	34	1	0.427711
ZNF37A	zinc finger protein 37A	0	1	0.427711
GABRB2	gamma-aminobutyric acid (GABA) A receptor, beta 2	1	1	0.426427
KRAS	Kirsten rat sarcoma viral oncogene homolog	35	1	0.426427
MXD1	MAX dimerization protein 1	0	1	0.426427
PLAGL2	pleiomorphic adenoma gene-like 2	0	1	0.426427
RAP2B	RAP2B, member of RAS oncogene family	0	1	0.426427
EDEM3	ER degradation enhancer, mannosidase alpha-like 3	1	1	0.425149
EPB41L4B	erythrocyte membrane protein band 4.1 like 4B	0	1	0.425149
SR140		1	1	0.425149
TRIM2	tripartite motif containing 2	0	1	0.425149
KIAA1147	KIAA1147	0	1	0.422619
KPNA1	karyopherin alpha 1 (importin alpha 5)	0	1	0.422619
MOBKL1A		0	1	0.422619
PDE7B	phosphodiesterase 7B	1	1	0.422619
ARID5B	AT rich interactive domain 5B (MRF1-like)	0	1	0.421365
GOSR1	golgi SNAP receptor complex member 1	1	1	0.421365
MEGF9	multiple EGF-like-domains 9	0	1	0.421365
NPTX1	neuronal pentraxin I	0	1	0.421365
NUFIP2	nuclear fragile X mental retardation protein interacting protein 2	0	1	0.421365
WDR26	WD repeat domain 26	0	1	0.421365
OPHN1	oligophrenin 1	0	1	0.420119
BCL2L2	BCL2-like 2	0	1	0.418879
HDAC4	histone deacetylase 4	0	1	0.418879
TRAM2	translocation associated membrane protein 2	0	1	0.418879
DCBLD2	discoidin, CUB and LCCL domain containing 2	0	1	0.417647
MACROD2	MACRO domain containing 2	0	1	0.417647
SORT1	sortilin 1	2	1	0.417647
SENP1	SUMO1/sentrin specific peptidase 1	0	1	0.416422
HLF	hepatic leukemia factor	0	1	0.415205
BTBD7	BTB (POZ) domain containing 7	0	1	0.413994
SC5DL		2	1	0.413994
LIFR	leukemia inhibitory factor receptor alpha	2	1	0.412791
RNF169	ring finger protein 169	0	1	0.412791
SRGAP2	SLIT-ROBO Rho GTPase activating protein 2	1	1	0.412791
STC1	stanniocalcin 1	0	1	0.412791
ZEB2	zinc finger E-box binding homeobox 2	0	1	0.412791
VANGL1	VANGL planar cell polarity protein 1	1	1	0.411595
ZBTB41	zinc finger and BTB domain containing 41	0	1	0.411595
PRRG1	proline rich Gla (G-carboxyglutamic acid) 1	0	1	0.410405
TACC1	transforming, acidic coiled-coil containing protein 1	0	1	0.410405
BMF	Bcl2 modifying factor	0	1	0.409222
C18ORF25	chromosome 18 open reading frame 25	0	1	0.409222
PHLPPL		0	1	0.409222
SGK269		0	1	0.409222
DCUN1D4	DCN1, defective in cullin neddylation 1, domain containing 4	0	1	0.408046
E2F3	E2F transcription factor 3	10	1	0.408046
ESRRG	estrogen-related receptor gamma	0	1	0.408046
ETS1	v-ets avian erythroblastosis virus E26 oncogene homolog 1	3	1	0.408046
NR2C2	nuclear receptor subfamily 2, group C, member 2	0	1	0.408046
ATP11A	ATPase, class VI, type 11A	0	1	0.406877
COL19A1	collagen, type XIX, alpha 1	0	1	0.406877
PPARGC1A	peroxisome proliferator-activated receptor gamma, coactivator 1 alpha	3	1	0.406877
RFX7	regulatory factor X, 7	0	1	0.405714
YOD1	YOD1 deubiquitinase	1	1	0.405714
C10ORF46		0	1	0.404559
NIPA1	non imprinted in Prader-Willi/Angelman syndrome 1	0	1	0.404559
NR4A3	nuclear receptor subfamily 4, group A, member 3	0	1	0.404559
PAN3	PAN3 poly(A) specific ribonuclease subunit homolog (S. cerevisiae)	0	1	0.404559
C9ORF5		0	1	0.403409
ST6GALNAC3	ST6 (alpha-N-acetyl-neuraminyl-2,3-beta-galactosyl-1,3)-N-acetylgalactosaminide alpha-2,6-sialyltransferase 3	2	1	0.403409
LASS6		0	1	0.402266
PCGF3	polycomb group ring finger 3	0	1	0.402266
PDGFRA	platelet-derived growth factor receptor, alpha polypeptide	11	1	0.402266
RNMT	RNA (guanine-7-) methyltransferase	0	1	0.402266
RUNX1	runt-related transcription factor 1	3	1	0.402266
SYNGAP1	synaptic Ras GTPase activating protein 1	0	1	0.402266
KCNMA1	potassium large conductance calcium-activated channel, subfamily M, alpha member 1	3	1	0.40113
CYB5B	cytochrome b5 type B (outer mitochondrial membrane)	0	1	0.4
ZFP91	ZFP91 zinc finger protein	0	1	0.4
RAB8B	RAB8B, member RAS oncogene family	0	1	0.398877
FAM46C	family with sequence similarity 46, member C	0	1	0.397759
WDFY3	WD repeat and FYVE domain containing 3	0	1	0.397759
IL17RD	interleukin 17 receptor D	0	1	0.396648
UBASH3B	ubiquitin associated and SH3 domain containing B	0	1	0.396648
GDA	guanine deaminase	2	1	0.395543
PHF15		0	1	0.395543
CNOT6	CCR4-NOT transcription complex, subunit 6	1	1	0.394445
MAGI1	membrane associated guanylate kinase, WW and PDZ domain containing 1	1	1	0.394445
RAPH1	Ras association (RalGDS/AF-6) and pleckstrin homology domains 1	0	1	0.394445
UBFD1	ubiquitin family domain containing 1	0	1	0.394445
FNDC3B	fibronectin type III domain containing 3B	0	1	0.393352
MLEC	malectin	0	1	0.393352
YPEL2	yippee-like 2 (Drosophila)	0	1	0.393352
GATAD2B	GATA zinc finger domain containing 2B	0	1	0.392265
PTPRD	protein tyrosine phosphatase, receptor type, D	0	1	0.39011
NRP2	neuropilin 2	0	1	0.387978
AFF1	AF4/FMR2 family, member 1	0	1	0.384824
HEMK1	HemK methyltransferase family member 1	3	1	0.384824
FIGN	fidgetin	0	1	0.383784
ZAK	sterile alpha motif and leucine zipper containing kinase AZK	2	1	0.382749
C1ORF107		0	1	0.380697
CCND2	cyclin D2	5	1	0.380697
HNRNPA3	heterogeneous nuclear ribonucleoprotein A3	1	1	0.380697
SEMA6D	sema domain, transmembrane domain (TM), and cytoplasmic domain, (semaphorin) 6D	1	1	0.380697
RAB11FIP4	RAB11 family interacting protein 4 (class II)	1	1	0.378667
FBXL11		0	1	0.37766
THRB	thyroid hormone receptor, beta	1	1	0.37766
ZBTB34	zinc finger and BTB domain containing 34	0	1	0.37766
RBM33	RNA binding motif protein 33	0	1	0.375662
DLG2	discs, large homolog 2 (Drosophila)	0	1	0.372703
ITGB8	integrin, beta 8	7	1	0.372703
KIAA2018	KIAA2018	0	1	0.372703
ARHGAP26	Rho GTPase activating protein 26	0	1	0.371728
IGF1	insulin-like growth factor 1 (somatomedin C)	13	1	0.370757
MOBP	myelin-associated oligodendrocyte basic protein	0	1	0.370757
PPP1R9A	protein phosphatase 1, regulatory subunit 9A	0	1	0.370757
RPS6KA3	ribosomal protein S6 kinase, 90kDa, polypeptide 3	6	1	0.368832
SLC7A11	solute carrier family 7 (anionic amino acid transporter light chain, xc- system), member 11	0	1	0.368832
PLEKHG4B	pleckstrin homology domain containing, family G (with RhoGef domain) member 4B	0	1	0.367876
IL1RAP	interleukin 1 receptor accessory protein	2	1	0.366925
TP53INP1	tumor protein p53 inducible nuclear protein 1	0	1	0.366925
XIAP	X-linked inhibitor of apoptosis	7	1	0.365039
FRS2	fibroblast growth factor receptor substrate 2	1	1	0.363172
SLC44A1	solute carrier family 44 (choline transporter), member 1	0	1	0.362245
MKLN1	muskelin 1, intracellular mediator containing kelch motifs	0	1	0.361323
ZNF264	zinc finger protein 264	0	1	0.361323
SMAD2	SMAD family member 2	9	1	0.360406
HS2ST1	heparan sulfate 2-O-sulfotransferase 1	1	1	0.358586
RIMS3	regulating synaptic membrane exocytosis 3	0	1	0.358586
ADARB1	adenosine deaminase, RNA-specific, B1	0	1	0.357683
MTF1	metal-regulatory transcription factor 1	0	1	0.357683
MKL2	MKL/myocardin-like 2	0	1	0.356784
BEND4	BEN domain containing 4	0	1	0.35589
HIPK1	homeodomain interacting protein kinase 1	0	1	0.35589
SHROOM4	shroom family member 4	0	1	0.35589
HMGA2	high mobility group AT-hook 2	0	1	0.354115
CBL	Cbl proto-oncogene, E3 ubiquitin protein ligase	9	1	0.353234
GNL3L	guanine nucleotide binding protein-like 3 (nucleolar)-like	0	1	0.353234
IGF1R	insulin-like growth factor 1 receptor	10	1	0.353234
SGCD	sarcoglycan, delta (35kDa dystrophin-associated glycoprotein)	4	1	0.353234
OPCML	opioid binding protein/cell adhesion molecule-like	0	1	0.351485
TANC2	tetratricopeptide repeat, ankyrin repeat and coiled-coil containing 2	0	1	0.350617
FAM123A		0	1	0.349754
IGF2BP1	insulin-like growth factor 2 mRNA binding protein 1	0	1	0.348895
PRICKLE2	prickle homolog 2 (Drosophila)	1	1	0.348039
AFF4	AF4/FMR2 family, member 4	0	1	0.347188
KLHL3	kelch-like family member 3	0	1	0.347188
ABHD2	abhydrolase domain containing 2	0	1	0.346341
EIF2C1		0	1	0.346341
BCL2	B-cell CLL/lymphoma 2	10	1	0.345499
CNOT6L	CCR4-NOT transcription complex, subunit 6-like	1	1	0.343826
JHDM1D	jumonji C domain containing histone demethylase 1 homolog D (S. cerevisiae)	0	1	0.343826
ADCY1	adenylate cyclase 1 (brain)	16	1	0.342995
PPARA	peroxisome proliferator-activated receptor alpha	3	1	0.342995
REPS2	RALBP1 associated Eps domain containing 2	0	1	0.342995
CREB5	cAMP responsive element binding protein 5	3	1	0.340528
RAB22A	RAB22A, member RAS oncogene family	1	1	0.340528
PURB	purine-rich element binding protein B	0	1	0.339713
SMC1A	structural maintenance of chromosomes 1A	2	1	0.339713
PGM2L1	phosphoglucomutase 2-like 1	1	1	0.338902
ERBB4	v-erb-b2 avian erythroblastic leukemia viral oncogene homolog 4	3	1	0.335697
IYD	iodotyrosine deiodinase	0	1	0.334906
PTGER3	prostaglandin E receptor 3 (subtype EP3)	2	1	0.334117
FOXP1	forkhead box P1	0	1	0.333333
SRGAP3	SLIT-ROBO Rho GTPase activating protein 3	1	1	0.333333
SV2B	synaptic vesicle glycoprotein 2B	1	1	0.333333
DLGAP2	discs, large (Drosophila) homolog-associated protein 2	0	1	0.331003
SNTB2	syntrophin, beta 2 (dystrophin-associated protein A1, 59kDa, basic component 2)	0	1	0.330232
GABRA4	gamma-aminobutyric acid (GABA) A receptor, alpha 4	1	1	0.328704
PPP1R12B	protein phosphatase 1, regulatory subunit 12B	1	1	0.327945
CSNK1G1	casein kinase 1, gamma 1	1	1	0.321267
SOX11	SRY (sex determining region Y)-box 11	0	1	0.318386
NFIB	nuclear factor I/B	0	1	0.314159
ACVR2B	activin A receptor, type IIB	2	1	0.306035
DCX	doublecortin	0	1	0.294606
AFF2	AF4/FMR2 family, member 2	0	1	0.284569
PTPRT	protein tyrosine phosphatase, receptor type, T	0	1	0.280079
ONECUT2	one cut homeobox 2	0	1	0.272553
NTRK2	neurotrophic tyrosine kinase, receptor, type 2	2	1	0.265421
