# Supplementary material for: Detecting Differentially Variable MicroRNAs via Model-Based Clustering
Source: Int J Genomics. 2018 Jul 12;2018:6591634. doi: 10.1155/2018/6591634 (PMC6079429; doi:10.1155/2018/6591634)
Supplement: Supplementary Materials — Details about the gs model and its parameter estimation via the EM algorithm. Supplemental Table A1: the list of the 157 DE-only miRNAs. Supplemental Table A2: the list of the 60 DV-and-DE miRNAs. Supplemental Table A3: the list of the 1639 genes targeted by the 7 miRNAs in S DVonly. Supplemental Table A4: the list of the 8141 genes targeted by the 157 miRNAs in S DEonly. Supplemental Table A5: the list of the 6893 genes targeted by the 60 miRNAs in S both. Supplemental Table A6: the list of the 6 KEGG pathways enriched by the 1639 genes targeted by the 7 miRNAs in S DVonly. Supplemental Table A7: the list of the 1 KEGG pathway enriched by the 8141 genes targeted by the 157 miRNAs in S DEonly. Supplemental Table A8: the list of the 2 KEGG pathways enriched by the 6893 genes targeted by the 60 miRNAs in S both. Supplemental Table A9: p values of two-sided Wilcoxon signed rank tests to test if the median Jaccard index obtained by the gs method is the same as that obtained by each of the other 16 methods. Supplemental Table A10: p values of two-sided Wilcoxon signed rank tests to test if the median FPR obtained by the gs method is the same as that obtained by each of the other 16 methods. Supplemental Table A11: p values of two-sided Wilcoxon signed rank tests to test if the median FNR obtained by the gs method is the same as that obtained by each of the other 16 methods. Supplemental Table A12: p values of two-sided Wilcoxon signed rank tests to test if the median proportion of validation obtained by the gs method is the same as that obtained by each of the other 16 methods based on 100 bootstrap samples. Figure A1: the plot of percentiles of log2 expression levels across arrays. Left panel: GSE67138. Right panel: GSE67139. Figure A2: the plot of the first and second principal components. Left panel: GSE67138. Right panel: GSE67139. Supplemental Figure A3: parallel boxplots of the 7 validated DV-only miRNAs. Left panel: GSE67138. Right panel: GSE67139. Supplemental Fi [file 6591634.f1.zip › TableA4_IJG_2364384.csv]

TARGET_GENE	GENE_DESCRIPTION	KEGG	OBSERVED_MIRNA	OE
A2BAR		0	1	5.68
DNMT3B1		0	2	5.68
DNMT3B3		0	1	5.68
LOC159091		0	2	5.68
LOC339804		0	2	5.68
LOC388650		0	2	5.68
PFV-1		0	1	5.68
IFI30	interferon, gamma-inducible protein 30	1	2	3.78667
CENPJ	centromere protein J	0	2	1.89333
SPATA7	spermatogenesis associated 7	0	1	1.89333
TAF10	TAF10 RNA polymerase II, TATA box binding protein (TBP)-associated factor, 30kDa	1	2	1.89333
GPR87	G protein-coupled receptor 87	0	1	1.42
KLK1	kallikrein 1	0	1	1.42
KRT126P	keratin 126 pseudogene	0	1	1.42
MSH6	mutS homolog 6	3	1	1.42
CCDC28B	coiled-coil domain containing 28B	0	4	1.33647
C4ORF27	chromosome 4 open reading frame 27	0	2	1.26222
DOCK6	dedicator of cytokinesis 6	0	3	1.21714
DYNLL2	dynein, light chain, LC8-type 2	1	6	1.21714
FRMPD1	FERM and PDZ domain containing 1	0	4	1.19579
C20ORF107		0	1	1.136
ATP5G1	ATP synthase, H+ transporting, mitochondrial Fo complex, subunit C1 (subunit 9)	5	2	1.03272
CDH18	cadherin 18, type 2	0	2	1.03272
CCDC19	coiled-coil domain containing 19	0	3	1.00235
UBC	ubiquitin C	1	4	0.987825
TXNL1	thioredoxin-like 1	0	6	0.973714
ZNF367	zinc finger protein 367	0	10	0.962712
ANKFN1	ankyrin-repeat and fibronectin type III domain containing 1	0	1	0.946667
MCM3AP	minichromosome maintenance complex component 3 associated protein	0	3	0.946667
NDUFS4	NADH dehydrogenase (ubiquinone) Fe-S protein 4, 18kDa (NADH-coenzyme Q reductase)	5	3	0.946667
NME1	NME/NM23 nucleoside diphosphate kinase 1	3	3	0.946667
PLA2G10	phospholipase A2, group X	14	1	0.946667
WWOX	WW domain containing oxidoreductase	0	1	0.946667
COL7A1	collagen, type VII, alpha 1	0	6	0.896843
JAKMIP2	janus kinase and microtubule interacting protein 2	0	7	0.883555
ATP13A1	ATPase type 13A1	0	2	0.873844
HSPA4L	heat shock 70kDa protein 4-like	1	12	0.862782
TMEM54	transmembrane protein 54	0	3	0.852
TIMM17B	translocase of inner mitochondrial membrane 17 homolog B (yeast)	0	7	0.845957
PNPLA6	patatin-like phospholipase domain containing 6	0	7	0.828334
ABCB6	ATP-binding cassette, sub-family B (MDR/TAP), member 6	1	2	0.811429
DCP1B	decapping mRNA 1B	1	1	0.811429
FGF6	fibroblast growth factor 6	4	1	0.811429
NFIL3	nuclear factor, interleukin 3 regulated	0	6	0.811429
RPS4Y1	ribosomal protein S4, Y-linked 1	1	1	0.811429
ZNF622	zinc finger protein 622	0	3	0.811428
NRBP1	nuclear receptor binding protein 1	0	13	0.802612
FUBP1	far upstream element (FUSE) binding protein 1	0	13	0.793978
CD163	CD163 molecule	0	5	0.788889
RFWD2	ring finger and WD repeat domain 2, E3 ubiquitin protein ligase	2	5	0.788889
TCP1	t-complex 1	0	5	0.788889
DLK1	delta-like 1 homolog (Drosophila)	0	4	0.783448
LIN7B	lin-7 homolog B (C. elegans)	0	4	0.783448
ADRB2	adrenoceptor beta 2, surface	4	10	0.778081
C11ORF42	chromosome 11 open reading frame 42	0	3	0.774546
RBM6	RNA binding motif protein 6	0	3	0.774546
TFAP2D	transcription factor AP-2 delta (activating enhancer binding protein 2 delta)	0	3	0.774546
SRPX	sushi-repeat containing protein, X-linked	0	7	0.764616
NRTN	neurturin	0	2	0.757332
SLC39A5	solute carrier family 39 (zinc transporter), member 5	0	2	0.757332
APOO	apolipoprotein O	0	3	0.740869
SCHIP1	schwannomin interacting protein 1	0	10	0.73766
ATG4D	autophagy related 4D, cysteine peptidase	1	7	0.736297
HSP90B1	heat shock protein 90kDa beta (Grp94), member 1	4	5	0.728205
NUDT8	nudix (nucleoside diphosphate linked moiety X)-type motif 8	0	8	0.72127
JARID2	jumonji, AT rich interactive domain 2	0	28	0.719637
ARMCX2	armadillo repeat containing, X-linked 2	0	9	0.710003
MORF4L2	mortality factor 4 like 2	0	9	0.710003
PTPN4	protein tyrosine phosphatase, non-receptor type 4 (megakaryocyte)	0	9	0.710003
CCDC71	coiled-coil domain containing 71	0	6	0.71
COX6C	cytochrome c oxidase subunit VIc	6	1	0.71
INTS8	integrator complex subunit 8	0	3	0.71
INTU	inturned planar cell polarity protein	0	2	0.71
MYH2	myosin, heavy chain 2, skeletal muscle, adult	2	1	0.71
PLEKHO1	pleckstrin homology domain containing, family O member 1	0	2	0.71
POLE2	polymerase (DNA directed), epsilon 2, accessory subunit	6	1	0.71
SLC5A11	solute carrier family 5 (sodium/inositol cotransporter), member 11	0	1	0.71
TMEM132A	transmembrane protein 132A	0	3	0.71
TSPAN5	tetraspanin 5	0	5	0.71
MORF4L1	mortality factor 4 like 1	0	12	0.702679
SMS	spermine synthase	5	7	0.697544
TRIM71	tripartite motif containing 71, E3 ubiquitin protein ligase	0	6	0.69551
CNTFR	ciliary neurotrophic factor receptor	2	10	0.692683
TMEM145	transmembrane protein 145	0	4	0.688484
TMSB10	thymosin beta 10	0	4	0.688484
YTHDF2	YTH domain family, member 2	0	12	0.688483
DYRK1B	dual-specificity tyrosine-(Y)-phosphorylation regulated kinase 1B	0	7	0.685518
MTA2	metastasis associated 1 family, member 2	0	9	0.681599
PHIP	pleckstrin homology domain interacting protein	0	3	0.681599
BRWD3	bromodomain and WD repeat domain containing 3	0	5	0.676191
GTF2H1	general transcription factor IIH, polypeptide 1, 62kDa	2	17	0.675246
STRBP	spermatid perinuclear RNA binding protein	0	12	0.674849
RAI2	retinoic acid induced 2	0	7	0.673898
FXR1	fragile X mental retardation, autosomal homolog 1	0	17	0.670555
AIM1L	absent in melanoma 1-like	0	4	0.668236
AKIRIN2	akirin 2	0	4	0.668236
TBPL1	TBP-like 1	2	9	0.663894
PRKAG2	protein kinase, AMP-activated, gamma 2 non-catalytic subunit	3	15	0.660466
TBP	TATA box binding protein	2	10	0.660464
CCK	cholecystokinin	2	3	0.655385
FAM184A	family with sequence similarity 184, member A	0	6	0.655385
HTR1E	5-hydroxytryptamine (serotonin) receptor 1E, G protein-coupled	1	3	0.655385
PCNA	proliferating cell nuclear antigen	5	3	0.655385
SNRPA1	small nuclear ribonucleoprotein polypeptide A'	1	3	0.655385
GADD45A	growth arrest and DNA-damage-inducible, alpha	3	7	0.651803
LRP2	low density lipoprotein receptor-related protein 2	1	11	0.650835
UMOD	uromodulin	0	4	0.649143
MAP3K4	mitogen-activated protein kinase kinase kinase 4	2	9	0.647086
IRS1	insulin receptor substrate 1	5	14	0.646506
KLF4	Kruppel-like factor 4 (gut)	0	14	0.646506
NTF3	neurotrophin 3	2	5	0.645455
ARL2	ADP-ribosylation factor-like 2	0	5	0.631111
C1QB	complement component 1, q subcomponent, B chain	5	3	0.631111
CCDC111		0	2	0.631111
GPRASP2	G protein-coupled receptor associated sorting protein 2	0	5	0.631111
LAMA2	laminin, alpha 2	10	2	0.631111
PIK3CA	phosphatidylinositol-4,5-bisphosphate 3-kinase, catalytic subunit alpha	40	7	0.631111
RAD51C	RAD51 paralog C	1	2	0.631111
SLC25A3	solute carrier family 25 (mitochondrial carrier; phosphate carrier), member 3	0	4	0.631111
TIMM8B	translocase of inner mitochondrial membrane 8 homolog B (yeast)	0	2	0.631111
ARID3A	AT rich interactive domain 3A (BRIGHT-like)	0	10	0.631109
HINT2	histidine triad nucleotide binding protein 2	0	1	0.631109
PDIA5	protein disulfide isomerase family A, member 5	0	1	0.631109
PGC	progastricsin (pepsinogen C)	0	1	0.631109
RGS8	regulator of G-protein signaling 8	0	1	0.631109
STEAP1	six transmembrane epithelial antigen of the prostate 1	0	1	0.631109
MAT2A	methionine adenosyltransferase II, alpha	3	22	0.627939
KIAA2026	KIAA2026	0	9	0.623414
STOX2	storkhead box 2	0	7	0.62125
LRRC41	leucine rich repeat containing 41	0	6	0.619636
VAMP8	vesicle-associated membrane protein 8	1	5	0.617392
MAP2K1	mitogen-activated protein kinase kinase 1	37	14	0.611691
EGR3	early growth response 3	0	31	0.611389
CBX4	chromobox homolog 4	0	10	0.610752
IPO7	importin 7	0	3	0.608572
CITED2	Cbp/p300-interacting transactivator, with Glu/Asp-rich carboxy-terminal domain, 2	0	9	0.608571
TBR1	T-box, brain, 1	0	9	0.608571
BBC3	BCL2 binding component 3	2	13	0.605246
FST	follistatin	1	5	0.604255
UBE2NL	ubiquitin-conjugating enzyme E2N-like	1	7	0.602425
SCN3A	sodium channel, voltage-gated, type III, alpha subunit	0	28	0.602424
ZFPM2	zinc finger protein, FOG family member 2	0	17	0.59975
TNXB	tenascin XB	2	4	0.597895
FAM49B	family with sequence similarity 49, member B	0	10	0.597894
KARS	lysyl-tRNA synthetase	1	2	0.597894
PRIM1	primase, DNA, polypeptide 1 (49kDa)	4	2	0.597894
PSMB8	proteasome (prosome, macropain) subunit, beta type, 8	1	2	0.597894
BAI3	brain-specific angiogenesis inhibitor 3	0	12	0.592695
MAP3K5	mitogen-activated protein kinase kinase kinase 5	4	10	0.591668
NCOR2	nuclear receptor corepressor 2	1	13	0.590721
ELAVL2	ELAV like neuron-specific RNA binding protein 2	0	28	0.589037
BTG3	BTG family, member 3	0	6	0.587587
CBLL1	Cbl proto-oncogene-like 1, E3 ubiquitin protein ligase	0	3	0.587586
GTSF1	gametocyte specific factor 1	0	3	0.587586
TUBA1A	tubulin, alpha 1a	3	3	0.587586
CHD7	chromodomain helicase DNA binding protein 7	0	16	0.586322
RAB34	RAB34, member RAS oncogene family	0	7	0.584706
RSBN1L	round spermatid basic protein 1-like	0	8	0.582565
ACTA1	actin, alpha 1, skeletal muscle	0	4	0.582564
TGM1	transglutaminase 1	0	4	0.582564
KPNB1	karyopherin (importin) beta 1	1	14	0.580437
ACVR1	activin A receptor, type I	2	15	0.579593
HAND2	heart and neural crest derivatives expressed 2	0	11	0.578517
PPP1R12A	protein phosphatase 1, regulatory subunit 12A	4	17	0.578204
DNAJA2	DnaJ (Hsp40) homolog, subfamily A, member 2	1	12	0.577628
NOG	noggin	1	6	0.577627
SIP1		1	6	0.577627
CDK8	cyclin-dependent kinase 8	0	7	0.576232
EIF2B5	eukaryotic translation initiation factor 2B, subunit 5 epsilon, 82kDa	1	7	0.576232
CAMSAP1L1		0	27	0.574383
DUSP1	dual specificity phosphatase 1	1	10	0.573736
VGLL2	vestigial like 2 (Drosophila)	0	14	0.572085
ESRRG	estrogen-related receptor gamma	0	35	0.571264
DVL1	dishevelled segment polarity protein 1	5	3	0.568
KLF7	Kruppel-like factor 7 (ubiquitous)	0	4	0.568
LAMA4	laminin, alpha 4	6	3	0.568
MIF	macrophage migration inhibitory factor (glycosylation-inhibiting factor)	2	1	0.568
NME7	NME/NM23 family member 7	3	7	0.568
OMG	oligodendrocyte myelin glycoprotein	0	5	0.568
PCOTH		0	1	0.568
PLUNC		0	3	0.568
PPIG	peptidylprolyl isomerase G (cyclophilin G)	0	2	0.568
SH2D2A	SH2 domain containing 2A	1	5	0.568
SHANK1	SH3 and multiple ankyrin repeat domains 1	0	1	0.568
SLC41A2	solute carrier family 41 (magnesium transporter), member 2	0	5	0.568
SNCG	synuclein, gamma (breast cancer-specific protein 1)	0	3	0.568
TRIP10	thyroid hormone receptor interactor 10	1	6	0.568
TAF5	TAF5 RNA polymerase II, TATA box binding protein (TBP)-associated factor, 100kDa	1	13	0.567999
NPAS4	neuronal PAS domain protein 4	0	11	0.567998
WIF1	WNT inhibitory factor 1	1	9	0.567998
MMD	monocyte to macrophage differentiation-associated	0	20	0.565173
OTX1	orthodenticle homeobox 1	0	11	0.562883
SMURF2	SMAD specific E3 ubiquitin protein ligase 2	3	11	0.562883
RLF	rearranged L-myc fusion	0	8	0.560985
FIGF	c-fos induced growth factor (vascular endothelial growth factor D)	7	6	0.558688
NLK	nemo-like kinase	3	22	0.557857
SLC22A17	solute carrier family 22, member 17	0	5	0.556863
CRIM1	cysteine rich transmembrane BMP regulator 1 (chordin-like)	0	25	0.554688
FBXO33	F-box protein 33	0	20	0.554147
WASF1	WAS protein family, member 1	5	8	0.554146
MEPCE	methylphosphate capping enzyme	0	7	0.552225
WNT1	wingless-type MMTV integration site family, member 1	5	10	0.551458
KCNH7	potassium voltage-gated channel, subfamily H (eag-related), member 7	0	6	0.549678
SIRT4	sirtuin 4	0	3	0.549677
WDR47	WD repeat domain 47	0	18	0.549677
HAS2	hyaluronan synthase 2	0	13	0.546962
GSPT1	G1 to S phase transition 1	0	5	0.546154
SNX2	sorting nexin 2	0	7	0.544657
SYDE1	synapse defective 1, Rho GTPase, homolog 1 (C. elegans)	0	14	0.544657
ACHE	acetylcholinesterase	1	9	0.543831
QKI	QKI, KH domain containing, RNA binding	0	45	0.542675
FBXO28	F-box protein 28	0	18	0.540953
AKR1B10	aldo-keto reductase family 1, member B10 (aldose reductase)	4	2	0.540952
ATP5G2	ATP synthase, H+ transporting, mitochondrial Fo complex, subunit C2 (subunit 9)	5	2	0.540952
DDX1	DEAD (Asp-Glu-Ala-Asp) box helicase 1	0	2	0.540952
EFHB	EF-hand domain family, member B	0	2	0.540952
ERCC6	excision repair cross-complementing rodent repair deficiency, complementation group 6	1	2	0.540952
EZH2	enhancer of zeste homolog 2 (Drosophila)	0	6	0.540952
GNG5	guanine nucleotide binding protein (G protein), gamma 5	1	2	0.540952
QARS	glutaminyl-tRNA synthetase	2	2	0.540952
SCGB2A1	secretoglobin, family 2A, member 1	0	2	0.540952
SOCS1	suppressor of cytokine signaling 1	5	6	0.540952
ZNF524	zinc finger protein 524	0	2	0.540952
ZNF385A	zinc finger protein 385A	0	13	0.538977
PBX3	pre-B-cell leukemia homeobox 3	0	20	0.538389
LRRN3	leucine rich repeat neuronal 3	0	7	0.537299
SLITRK4	SLIT and NTRK-like family, member 4	0	5	0.535849
SSBP2	single-stranded DNA binding protein 2	0	5	0.535849
MYCN	v-myc avian myelocytomatosis viral oncogene neuroblastoma derived homolog	0	15	0.535848
PAIP2	poly(A) binding protein interacting protein 2	0	10	0.535848
C6ORF62	chromosome 6 open reading frame 62	0	13	0.535073
SGK1	serum/glucocorticoid regulated kinase 1	1	13	0.535073
COL4A1	collagen, type IV, alpha 1	6	16	0.534587
C20ORF46		0	3	0.5325
C6ORF136	chromosome 6 open reading frame 136	0	3	0.5325
CRYM	crystallin, mu	0	3	0.5325
DDX5	DEAD (Asp-Glu-Ala-Asp) box helicase 5	1	6	0.5325
IRF2BP1	interferon regulatory factor 2 binding protein 1	0	3	0.5325
KCNQ4	potassium voltage-gated channel, KQT-like subfamily, member 4	0	3	0.5325
NID2	nidogen 2 (osteonidogen)	0	6	0.5325
PAFAH1B1	platelet-activating factor acetylhydrolase 1b, regulatory subunit 1 (45kDa)	2	33	0.5325
CFL2	cofilin 2 (muscle)	3	26	0.531223
BIRC6	baculoviral IAP repeat containing 6	1	10	0.530842
SYT3	synaptotagmin III	0	7	0.530132
CHD1	chromodomain helicase DNA binding protein 1	0	13	0.527429
COL1A2	collagen, type I, alpha 2	4	9	0.527009
ZNF423	zinc finger protein 423	0	9	0.527009
KIAA1012		0	10	0.525925
PTEN	phosphatase and tensin homolog	11	23	0.524659
KPNA4	karyopherin alpha 4 (importin alpha 3)	0	19	0.523883
USP3	ubiquitin specific peptidase 3	0	13	0.523687
EGLN2	egl-9 family hypoxia-inducible factor 2	2	7	0.523159
TFEB	transcription factor EB	0	7	0.523159
NUFIP2	nuclear fragile X mental retardation protein interacting protein 2	0	31	0.522492
SLC38A2	solute carrier family 38, member 2	1	24	0.522298
DMRT2	doublesex and mab-3 related transcription factor 2	0	18	0.521633
SOCS6	suppressor of cytokine signaling 6	0	27	0.521633
C7ORF43	chromosome 7 open reading frame 43	0	10	0.521101
SOX5	SRY (sex determining region Y)-box 5	0	21	0.518608
BTG1	B-cell translocation gene 1, anti-proliferative	0	12	0.516365
FBXW9	F-box and WD repeat domain containing 9	0	2	0.516364
GAP43	growth associated protein 43	0	6	0.516364
GSTA4	glutathione S-transferase alpha 4	3	4	0.516364
HOXA5	homeobox A5	0	6	0.516364
MYL6	myosin, light chain 6, alkali, smooth muscle and non-muscle	1	2	0.516364
RCVRN	recoverin	1	2	0.516364
PPARGC1B	peroxisome proliferator-activated receptor gamma, coactivator 1 beta	0	3	0.516363
ATP6V1E2	ATPase, H+ transporting, lysosomal 31kDa, V1 subunit E2	6	1	0.516362
COL2A1	collagen, type II, alpha 1	4	7	0.516362
HOXC4	homeobox C4	0	8	0.516362
LRP3	low density lipoprotein receptor-related protein 3	0	1	0.516362
PPWD1	peptidylprolyl isomerase domain and WD repeat containing 1	0	1	0.516362
SERPINF1	serpin peptidase inhibitor, clade F (alpha-2 antiplasmin, pigment epithelium derived factor), member 1	0	1	0.516362
TMEM63B	transmembrane protein 63B	0	7	0.516362
ATXN1	ataxin 1	0	42	0.515248
ACVR2A	activin A receptor, type IIA	2	26	0.514565
CTDSPL2	CTD (carboxy-terminal domain, RNA polymerase II, polypeptide A) small phosphatase like 2	0	25	0.512635
EIF4G2	eukaryotic translation initiation factor 4 gamma, 2	2	13	0.509242
SFRS11		0	13	0.509242
AP1GBP1		0	4	0.504889
CNOT6	CCR4-NOT transcription complex, subunit 6	1	32	0.504889
PPAP2A	phosphatidic acid phosphatase type 2A	6	4	0.504889
COPS2	COP9 signalosome subunit 2	0	8	0.504887
STRADB	STE20-related kinase adaptor beta	0	8	0.504887
PPARGC1A	peroxisome proliferator-activated receptor gamma, coactivator 1 alpha	3	31	0.504528
UBE4B	ubiquitination factor E4B	2	11	0.503871
CYB5R4	cytochrome b5 reductase 4	0	7	0.503289
TMEM115	transmembrane protein 115	0	7	0.503289
MEOX2	mesenchyme homeobox 2	0	13	0.502314
ANKRD13C	ankyrin repeat domain 13C	0	12	0.501177
LIPE	lipase, hormone-sensitive	1	3	0.501177
SBF1	SET binding factor 1	0	3	0.501177
AMIGO1	adhesion molecule with Ig-like domain 1	0	6	0.501176
AP2M1	adaptor-related protein complex 2, mu 1 subunit	2	6	0.501176
BAZ2B	bromodomain adjacent to zinc finger domain, 2B	0	18	0.501176
IMPDH1	IMP (inosine 5'-monophosphate) dehydrogenase 1	3	9	0.501176
KIF26B	kinesin family member 26B	0	6	0.501176
PAPD4	PAP associated domain containing 4	0	11	0.499841
C7ORF60	chromosome 7 open reading frame 60	0	22	0.49984
DNER	delta/notch-like EGF repeat containing	0	8	0.499341
PLK2	polo-like kinase 2	0	8	0.499341
KLF10	Kruppel-like factor 10	0	13	0.498918
NOVA1	neuro-oncological ventral antigen 1	0	23	0.498626
PHF6	PHD finger protein 6	0	28	0.497
YPEL3	yippee-like 3 (Drosophila)	0	7	0.497
SATB2	SATB homeobox 2	0	25	0.496503
ZFYVE26	zinc finger, FYVE domain containing 26	0	18	0.49631
C18ORF34		0	8	0.493915
RAB24	RAB24, member RAS oncogene family	0	8	0.493915
PLD3	phospholipase D family, member 3	0	4	0.493913
PSPH	phosphoserine phosphatase	2	2	0.493913
PTH	parathyroid hormone	1	6	0.493913
RBM10	RNA binding motif protein 10	0	2	0.493913
SLC25A33	solute carrier family 25 (pyrimidine nucleotide carrier), member 33	0	2	0.493913
TGIF2LY	TGFB-induced factor homeobox 2-like, Y-linked	0	4	0.493913
ELK1	ELK1, member of ETS oncogene family	8	11	0.491969
SEC24C	SEC24 family member C	1	11	0.491969
PTPRM	protein tyrosine phosphatase, receptor type, M	2	10	0.489656
C5ORF13		0	20	0.489655
DHX15	DEAH (Asp-Glu-Ala-His) box helicase 15	1	5	0.489655
E2F3	E2F transcription factor 3	10	30	0.489655
RNF214	ring finger protein 214	0	5	0.489655
CDC27	cell division cycle 27	4	8	0.488602
HOXD10	homeobox D10	0	8	0.488602
MAPRE1	microtubule-associated protein, RP/EB family, member 1	0	19	0.488325
KBTBD2	kelch repeat and BTB (POZ) domain containing 2	0	11	0.488124
LTBP1	latent transforming growth factor beta binding protein 1	1	11	0.488124
PDIK1L	PDLIM1 interacting kinase 1 like	0	25	0.487973
ELL2	elongation factor, RNA polymerase II, 2	0	17	0.487677
DLL1	delta-like 1 (Drosophila)	1	9	0.486858
ACTN1	actinin, alpha 1	8	6	0.486857
CEP192	centrosomal protein 192kDa	0	3	0.486857
LOC144097		0	3	0.486857
TAF15	TAF15 RNA polymerase II, TATA box binding protein (TBP)-associated factor, 68kDa	0	6	0.486857
ZFHX3	zinc finger homeobox 3	0	27	0.486857
F3	coagulation factor III (thromboplastin, tissue factor)	1	10	0.485469
DOCK4	dedicator of cytokinesis 4	0	21	0.484878
HSF2	heat shock transcription factor 2	0	7	0.484878
NAP1L3	nucleosome assembly protein 1-like 3	0	7	0.484878
C2ORF42	chromosome 2 open reading frame 42	0	8	0.483406
H2AFY	H2A histone family, member Y	1	8	0.483406
KCNS3	potassium voltage-gated channel, delayed-rectifier, subfamily S, member 3	0	4	0.483404
NOX4	NADPH oxidase 4	0	4	0.483404
NRARP	NOTCH-regulated ankyrin repeat protein	0	4	0.483404
SESN3	sestrin 3	1	4	0.483404
VPS33B	vacuolar protein sorting 33 homolog B (yeast)	0	4	0.483404
MAP3K1	mitogen-activated protein kinase kinase kinase 1, E3 ubiquitin protein ligase	5	23	0.482067
ARHGAP12	Rho GTPase activating protein 12	0	19	0.481786
HTR2C	5-hydroxytryptamine (serotonin) receptor 2C, G protein-coupled	3	25	0.481356
RBBP8	retinoblastoma binding protein 8	0	5	0.481356
OTUD4	OTU domain containing 4	0	30	0.481355
KLC2	kinesin light chain 2	0	11	0.480614
RASA1	RAS p21 protein activator (GTPase activating protein) 1	2	12	0.48
VPS37A	vacuolar protein sorting 37 homolog A (S. cerevisiae)	1	6	0.48
MEX3B	mex-3 RNA binding family member B	0	14	0.479036
FOXN3	forkhead box N3	0	32	0.478316
SHOC2	soc-2 suppressor of clear homolog (C. elegans)	0	17	0.47802
CHMP4B	charged multivesicular body protein 4B	1	10	0.47731
STAG3L4	stromal antigen 3-like 4 (pseudogene)	0	12	0.476644
RNF38	ring finger protein 38	0	29	0.476069
GAB1	GRB2-associated binding protein 1	4	11	0.473335
RAP1B	RAP1B, member of RAS oncogene family	8	11	0.473335
SATB1	SATB homeobox 1	0	11	0.473335
ARID4B	AT rich interactive domain 4B (RBP1-like)	0	18	0.473334
BFSP1	beaded filament structural protein 1, filensin	0	1	0.473334
BTG2	BTG family, member 2	0	20	0.473334
DDX4	DEAD (Asp-Glu-Ala-Asp) box polypeptide 4	0	3	0.473334
FHOD1	formin homology 2 domain containing 1	0	2	0.473334
GHRH	growth hormone releasing hormone	1	1	0.473334
MYH4	myosin, heavy chain 4, skeletal muscle	2	1	0.473334
PHF12	PHD finger protein 12	0	10	0.473334
RAPGEF4	Rap guanine nucleotide exchange factor (GEF) 4	1	10	0.473334
RNF5	ring finger protein 5, E3 ubiquitin protein ligase	1	4	0.473334
SEC61G	Sec61 gamma subunit	4	1	0.473334
SMARCA4	SWI/SNF related, matrix associated, actin dependent regulator of chromatin, subfamily a, member 4	0	4	0.473334
TSSK2	testis-specific serine kinase 2	0	1	0.473334
ZEB1	zinc finger E-box binding homeobox 1	0	5	0.473334
CAMK2N1	calcium/calmodulin-dependent protein kinase II inhibitor 1	0	12	0.473333
SIRT1	sirtuin 1	0	17	0.473333
WDR44	WD repeat domain 44	0	9	0.473332
SCN1A	sodium channel, voltage-gated, type I, alpha subunit	0	19	0.471267
ELF2	E74-like factor 2 (ets domain transcription factor)	0	13	0.470318
ARRDC3	arrestin domain containing 3	0	22	0.469774
EED	embryonic ectoderm development	0	10	0.46942
CADM1	cell adhesion molecule 1	1	19	0.469217
AMMECR1L	AMMECR1-like	0	26	0.468825
ZBTB34	zinc finger and BTB domain containing 34	0	31	0.468298
UBE2D1	ubiquitin-conjugating enzyme E2D 1	2	15	0.468132
SALL3	spalt-like transcription factor 3	0	7	0.467766
TIAL1	TIA1 cytotoxic granule-associated RNA binding protein-like 1	0	14	0.467764
MAP4K3	mitogen-activated protein kinase kinase kinase kinase 3	1	13	0.467342
USP25	ubiquitin specific peptidase 25	0	13	0.467342
SUZ12	SUZ12 polycomb repressive complex 2 subunit	0	19	0.467186
TAF4	TAF4 RNA polymerase II, TATA box binding protein (TBP)-associated factor, 135kDa	2	12	0.466849
YTHDF3	YTH domain family, member 3	0	23	0.466572
JARID1C		0	11	0.46627
TBC1D15	TBC1 domain family, member 15	0	11	0.46627
RYBP	RING1 and YY1 binding protein	0	27	0.46614
PHLDA3	pleckstrin homology-like domain, family A, member 3	0	5	0.465574
NFIB	nuclear factor I/B	0	37	0.464956
FRS2	fibroblast growth factor receptor substrate 2	1	32	0.46486
WHSC1L1	Wolf-Hirschhorn syndrome candidate 1-like 1	1	18	0.464727
POU3F2	POU class 3 homeobox 2	0	22	0.464536
HDHD2	haloacid dehalogenase-like hydrolase domain containing 2	0	13	0.464402
FRYL	FRY-like	0	16	0.463674
HOXB8	homeobox B8	0	8	0.463674
BCL11A	B-cell CLL/lymphoma 11A (zinc finger protein)	0	28	0.463673
YIPF3	Yip1 domain family, member 3	0	4	0.463673
TNRC6A	trinucleotide repeat containing 6A	0	19	0.463176
FBXW7	F-box and WD repeat domain containing 7, E3 ubiquitin protein ligase	1	18	0.462624
GPM6A	glycoprotein M6A	0	18	0.462624
SCN2A	sodium channel, voltage-gated, type II, alpha subunit	0	21	0.462326
ATP2A2	ATPase, Ca++ transporting, cardiac muscle, slow twitch 2	7	14	0.462325
FXR2	fragile X mental retardation, autosomal homolog 2	0	7	0.462325
SFRS2		1	17	0.46201
RAB12	RAB12, member RAS oncogene family	0	10	0.46179
SLC24A3	solute carrier family 24 (sodium/potassium/calcium exchanger), member 3	0	19	0.461197
TBC1D19	TBC1 domain family, member 19	0	3	0.46054
PLAG1	pleiomorphic adenoma gene 1	0	32	0.460152
ATP2B1	ATPase, Ca++ transporting, plasma membrane 1	3	26	0.460062
BTAF1	BTAF1 RNA polymerase II, B-TFIID transcription factor-associated, 170kDa	0	14	0.459653
SIX4	SIX homeobox 4	0	25	0.459547
NFIX	nuclear factor I/X (CCAAT-binding transcription factor)	0	22	0.459411
TRIM2	tripartite motif containing 2	0	27	0.459161
AEBP2	AE binding protein 2	0	24	0.45899
TSHZ3	teashirt zinc finger homeobox 3	0	16	0.45899
JMJD3		0	8	0.458989
MEIS2	Meis homeobox 2	0	21	0.458769
IL6	interleukin 6 (interferon, beta 2)	14	5	0.458065
UGP2	UDP-glucose pyrophosphorylase 2	5	5	0.458065
UNC5A	unc-5 homolog A (C. elegans)	1	12	0.45745
ADAMTS18	ADAM metallopeptidase with thrombospondin type 1 motif, 18	0	14	0.457012
HNRNPD	heterogeneous nuclear ribonucleoprotein D (AU-rich element RNA binding protein 1, 37kDa)	0	7	0.457012
TMEM161B	transmembrane protein 161B	0	9	0.45643
EPC2	enhancer of polycomb homolog 2 (Drosophila)	0	11	0.456058
ISL1	ISL LIM homeobox 1	0	11	0.456058
PTGER2	prostaglandin E receptor 2 (subtype EP2), 53kDa	1	11	0.456058
SETD8	SET domain containing (lysine methyltransferase) 8	1	11	0.456058
FMR1	fragile X mental retardation 1	0	19	0.455358
NFAT5	nuclear factor of activated T-cells 5, tonicity-responsive	6	41	0.454844
ALG8	ALG8, alpha-1,3-glucosyltransferase	2	2	0.4544
ANKHD1	ankyrin repeat and KH domain containing 1	0	4	0.4544
ATP5B	ATP synthase, H+ transporting, mitochondrial F1 complex, beta polypeptide	5	2	0.4544
BTG4	B-cell translocation gene 4	0	2	0.4544
CREBZF	CREB/ATF bZIP transcription factor	0	22	0.4544
E2F7	E2F transcription factor 7	0	22	0.4544
FBXO32	F-box protein 32	0	2	0.4544
P4HA2	prolyl 4-hydroxylase, alpha polypeptide II	2	4	0.4544
PLXNC1	plexin C1	1	2	0.4544
PMS1	PMS1 postmeiotic segregation increased 1 (S. cerevisiae)	0	2	0.4544
POU4F2	POU class 4 homeobox 2	0	14	0.4544
SLC35F4	solute carrier family 35, member F4	0	2	0.4544
LMTK2	lemur tyrosine kinase 2	0	6	0.454399
RAP2C	RAP2C, member of RAS oncogene family	0	19	0.453446
LRP12	low density lipoprotein receptor-related protein 12	0	13	0.453007
MIER3	mesoderm induction early response 1, family member 3	0	26	0.453006
KLHL13	kelch-like family member 13	1	11	0.452754
SFRS10		1	9	0.452389
CDKN2AIP	CDKN2A interacting protein	0	7	0.451817
CAPRIN1	cell cycle associated protein 1	0	26	0.451621
CPEB4	cytoplasmic polyadenylation element binding protein 4	0	26	0.451621
ZFC3H1	zinc finger, C3H1-type containing	0	10	0.450793
TNRC6B	trinucleotide repeat containing 6B	0	43	0.450627
CPEB3	cytoplasmic polyadenylation element binding protein 3	0	26	0.450244
NXPH1	neurexophilin 1	0	13	0.450244
JAZF1	JAZF zinc finger 1	0	20	0.449012
C14ORF4		0	6	0.448422
EIF3A	eukaryotic translation initiation factor 3, subunit A	1	9	0.448422
GLS2	glutaminase 2 (liver, mitochondrial)	6	6	0.448422
PRTG	protogenin	0	6	0.448422
CSDA		1	3	0.448421
NR1D1	nuclear receptor subfamily 1, group D, member 1	1	3	0.448421
SYT1	synaptotagmin I	0	21	0.448421
MYBL1	v-myb avian myeloblastosis viral oncogene homolog-like 1	0	15	0.44842
CLOCK	clock circadian regulator	1	20	0.447245
ID2	inhibitor of DNA binding 2, dominant negative helix-loop-helix protein	1	7	0.446742
BCO2	beta-carotene oxygenase 2	0	9	0.444521
HNRNPF	heterogeneous nuclear ribonucleoprotein F	0	9	0.444521
PTPN12	protein tyrosine phosphatase, non-receptor type 12	0	9	0.444521
TOB1	transducer of ERBB2, 1	0	5	0.44375
RUSC2	RUN and SH3 domain containing 2	0	6	0.442596
RBM9		0	13	0.442156
PSMD7	proteasome (prosome, macropain) 26S subunit, non-ATPase, 7	1	7	0.441776
JUN	jun proto-oncogene	15	8	0.441166
USP48	ubiquitin specific peptidase 48	0	9	0.44069
BTBD10	BTB (POZ) domain containing 10	0	10	0.44031
ITGA5	integrin, alpha 5 (fibronectin receptor, alpha polypeptide)	10	10	0.44031
PPP2CA	protein phosphatase 2, catalytic subunit, alpha isozyme	7	11	0.44
EN2	engrailed homeobox 2	0	14	0.439336
BLCAP	bladder cancer associated protein	0	15	0.439176
MLL3		0	17	0.438909
GMFB	glia maturation factor, beta	0	23	0.43839
B3GNT1	UDP-GlcNAc:betaGal beta-1,3-N-acetylglucosaminyltransferase 1	3	6	0.436924
CCNYL1	cyclin Y-like 1	0	6	0.436924
DEDD	death effector domain containing	0	12	0.436924
PAWR	PRKC, apoptosis, WT1, regulator	0	6	0.436924
RNF145	ring finger protein 145	0	12	0.436924
GBA	glucosidase, beta, acid	4	7	0.436923
GPR63	G protein-coupled receptor 63	0	3	0.436923
ITM2A	integral membrane protein 2A	0	4	0.436923
MRPL33	mitochondrial ribosomal protein L33	0	3	0.436923
MYT1L	myelin transcription factor 1-like	0	21	0.436923
NCOA2	nuclear receptor coactivator 2	0	8	0.436923
NEUROD1	neuronal differentiation 1	1	15	0.436923
NSMCE2	non-SMC element 2, MMS21 homolog (S. cerevisiae)	0	2	0.436923
PENK	proenkephalin	0	2	0.436923
POLG	polymerase (DNA directed), gamma	1	4	0.436923
RDX	radixin	1	16	0.436923
RRAGA	Ras-related GTP binding A	0	4	0.436923
SMARCC2	SWI/SNF related, matrix associated, actin dependent regulator of chromatin, subfamily c, member 2	0	5	0.436923
ZNF579	zinc finger protein 579	0	2	0.436923
ACTA2	actin, alpha 2, smooth muscle, aorta	1	1	0.436922
CFC1	cripto, FRL-1, cryptic family 1	0	1	0.436922
PLTP	phospholipid transfer protein	1	1	0.436922
RPL14	ribosomal protein L14	1	1	0.436922
SALL1	spalt-like transcription factor 1	0	10	0.436922
SCRG1	stimulator of chondrogenesis 1	0	1	0.436922
SIAH1	siah E3 ubiquitin protein ligase 1	3	9	0.436922
NAB1	NGFI-A binding protein 1 (EGR1 binding protein 1)	0	19	0.435161
IRS2	insulin receptor substrate 2	5	18	0.435064
RPS6KB1	ribosomal protein S6 kinase, 70kDa, polypeptide 1	6	26	0.434353
CPD	carboxypeptidase D	0	25	0.434251
USP9X	ubiquitin specific peptidase 9, X-linked	0	25	0.434251
FOXG1	forkhead box G1	0	10	0.433588
SOX11	SRY (sex determining region Y)-box 11	0	34	0.433004
THAP11	THAP domain containing 11	0	7	0.432175
TNFRSF11B	tumor necrosis factor receptor superfamily, member 11b	1	7	0.432175
ARPP-19		0	14	0.432174
LSM12	LSM12 homolog (S. cerevisiae)	0	14	0.432174
CPEB2	cytoplasmic polyadenylation element binding protein 2	0	25	0.431611
FBXL10		0	12	0.431393
BZW2	basic leucine zipper and W2 domains 2	0	6	0.431391
C11ORF61		0	6	0.431391
FAM178A	family with sequence similarity 178, member A	0	23	0.431155
CHST1	carbohydrate (keratan sulfate Gal-6) sulfotransferase 1	1	10	0.430304
RTN4	reticulon 4	0	10	0.430304
ANP32B	acidic (leucine-rich) nuclear phosphoprotein 32 family, member B	0	5	0.430303
PLP1	proteolipid protein 1	0	15	0.430303
PCDH10	protocadherin 10	0	13	0.429301
WEE1	WEE1 G2 checkpoint kinase	1	13	0.429301
DCTN2	dynactin 2 (p50)	2	4	0.428679
TAF12	TAF12 RNA polymerase II, TATA box binding protein (TBP)-associated factor, 20kDa	1	4	0.428679
ERBB2IP	erbb2 interacting protein	1	19	0.428253
ANK2	ankyrin 2, neuronal	0	23	0.426928
USP33	ubiquitin specific peptidase 33	0	13	0.426821
CNOT6L	CCR4-NOT transcription complex, subunit 6-like	1	31	0.426344
BAI1	brain-specific angiogenesis inhibitor 1	1	6	0.426
BRSK1	BR serine/threonine kinase 1	0	3	0.426
CCRN4L	CCR4 carbon catabolite repression 4-like (S. cerevisiae)	0	3	0.426
DCUN1D5	DCN1, defective in cullin neddylation 1, domain containing 5	0	3	0.426
DICER1	dicer 1, ribonuclease type III	0	21	0.426
EIF1B	eukaryotic translation initiation factor 1B	1	3	0.426
EIF5B	eukaryotic translation initiation factor 5B	1	6	0.426
G0S2	G0/G1switch 2	0	3	0.426
PDHX	pyruvate dehydrogenase complex, component X	4	6	0.426
PI4KA	phosphatidylinositol 4-kinase, catalytic, alpha	3	3	0.426
HIF1A	hypoxia inducible factor 1, alpha subunit (basic helix-loop-helix transcription factor)	3	11	0.425035
TRPS1	trichorhinophalangeal syndrome I	0	31	0.424289
SPTY2D1	SPT2, Suppressor of Ty, domain containing 1 (S. cerevisiae)	0	23	0.424156
GRM3	glutamate receptor, metabotropic 3	1	5	0.423881
KIT	v-kit Hardy-Zuckerman 4 feline sarcoma viral oncogene homolog	6	10	0.423881
RAB5A	RAB5A, member RAS oncogene family	5	10	0.423881
SESTD1	SEC14 and spectrin domains 1	0	10	0.423881
CCNT2	cyclin T2	0	20	0.42388
NBEA	neurobeachin	0	15	0.42388
ZIC3	Zic family member 3	0	15	0.42388
WWP1	WW domain containing E3 ubiquitin protein ligase 1	2	9	0.422478
DYRK1A	dual-specificity tyrosine-(Y)-phosphorylation regulated kinase 1A	0	29	0.422359
TMEM87A	transmembrane protein 87A	0	11	0.422162
CNTN4	contactin 4	0	15	0.421782
ZNF362	zinc finger protein 362	0	17	0.42166
RICTOR	RPTOR independent companion of MTOR, complex 2	1	25	0.421365
PURB	purine-rich element binding protein B	0	31	0.421244
HSPA8	heat shock 70kDa protein 8	6	4	0.420741
KRTAP4-4	keratin associated protein 4-4	0	4	0.420741
LRP1B	low density lipoprotein receptor-related protein 1B	0	14	0.420741
MAP1A	microtubule-associated protein 1A	0	12	0.420741
MMP16	matrix metallopeptidase 16 (membrane-inserted)	0	26	0.420741
SMARCD1	SWI/SNF related, matrix associated, actin dependent regulator of chromatin, subfamily d, member 1	0	14	0.420741
CCDC23	coiled-coil domain containing 23	0	2	0.42074
GSK3B	glycogen synthase kinase 3 beta	19	2	0.42074
KIAA0922	KIAA0922	0	2	0.42074
LBX1	ladybird homeobox 1	0	2	0.42074
NMB	neuromedin B	1	2	0.42074
NPM3	nucleophosmin/nucleoplasmin 3	0	2	0.42074
SNRK	SNF related kinase	0	18	0.42074
TPI1	triosephosphate isomerase 1	4	2	0.42074
TUBB2B	tubulin, beta 2B class IIb	3	2	0.42074
CCNE1	cyclin E1	6	6	0.420739
ESPN	espin	0	6	0.420739
GGNBP2	gametogenetin binding protein 2	0	6	0.420739
LATS1	large tumor suppressor kinase 1	0	6	0.420739
PLAA	phospholipase A2-activating protein	1	6	0.420739
PAK7	p21 protein (Cdc42/Rac)-activated kinase 7	6	17	0.419826
ELMOD1	ELMO/CED-12 domain containing 1	0	15	0.419705
COL24A1	collagen, type XXIV, alpha 1	0	11	0.419329
TRIM37	tripartite motif containing 37	1	11	0.419329
ST18	suppression of tumorigenicity 18 (breast carcinoma) (zinc finger protein)	0	16	0.418802
ARID1A	AT rich interactive domain 1A (SWI-like)	0	10	0.417648
IKBKB	inhibitor of kappa light polypeptide gene enhancer in B-cells, kinase beta	24	10	0.417648
PCMT1	protein-L-isoaspartate (D-aspartate) O-methyltransferase	0	8	0.416881
HAS3	hyaluronan synthase 3	0	19	0.416679
MINK1	misshapen-like kinase 1	0	11	0.416533
PFN2	profilin 2	2	17	0.416206
EIF2C1		0	30	0.41561
ID1	inhibitor of DNA binding 1, dominant negative helix-loop-helix protein	1	3	0.41561
LRRC8D	leucine rich repeat containing 8 family, member D	0	3	0.41561
MASTL	microtubule associated serine/threonine kinase-like	0	3	0.41561
SEMA4B	sema domain, immunoglobulin domain (Ig), transmembrane domain (TM) and short cytoplasmic domain, (semaphorin) 4B	1	3	0.41561
SLC17A6	solute carrier family 17 (vesicular glutamate transporter), member 6	0	12	0.41561
NFIA	nuclear factor I/A	0	10	0.414598
PHOX2B	paired-like homeobox 2b	0	10	0.414598
WDFY3	WD repeat and FYVE domain containing 3	0	26	0.413669
BAZ2A	bromodomain adjacent to zinc finger domain, 2A	0	19	0.413486
CALU	calumenin	0	19	0.413486
TBX5	T-box 5	0	12	0.413092
ANXA5	annexin A5	0	4	0.413091
CAND1	cullin-associated and neddylation-dissociated 1	0	16	0.413091
CEBPA	CCAAT/enhancer binding protein (C/EBP), alpha	2	4	0.413091
CHD9	chromodomain helicase DNA binding protein 9	0	20	0.413091
CHIC2	cysteine-rich hydrophobic domain 2	0	4	0.413091
HAO1	hydroxyacid oxidase (glycolate oxidase) 1	3	4	0.413091
SNRPC	small nuclear ribonucleoprotein polypeptide C	1	4	0.413091
SPHK2	sphingosine kinase 2	5	4	0.413091
E2F5	E2F transcription factor 5, p130-binding	2	8	0.41309
RNF6	ring finger protein (C3H2C3 type) 6	0	8	0.41309
NRIP1	nuclear receptor interacting protein 1	0	21	0.412734
GOLGA4	golgin A4	0	9	0.412258
JPH1	junctophilin 1	0	18	0.412258
MEF2C	myocyte enhancer factor 2C	1	18	0.412258
CEP350	centrosomal protein 350kDa	0	23	0.412113
MAP3K7IP3		1	23	0.412113
KPNA3	karyopherin alpha 3 (importin alpha 4)	0	19	0.411908
PSMC6	proteasome (prosome, macropain) 26S subunit, ATPase, 6	1	5	0.411594
ANKRD13B	ankyrin repeat domain 13B	0	12	0.410602
CAPN6	calpain 6	0	13	0.410222
UBFD1	ubiquitin family domain containing 1	0	26	0.410222
C16ORF72	chromosome 16 open reading frame 72	0	20	0.410108
MAP3K3	mitogen-activated protein kinase kinase kinase 3	3	20	0.410108
SLC35A1	solute carrier family 35 (CMP-sialic acid transporter), member A1	0	7	0.409896
FOXF2	forkhead box F2	0	8	0.409369
SEMA3A	sema domain, immunoglobulin domain (Ig), short basic domain, secreted, (semaphorin) 3A	1	17	0.409153
ZNF238		0	19	0.408788
GABRA1	gamma-aminobutyric acid (GABA) A receptor, alpha 1	1	12	0.408144
LBR	lamin B receptor	0	14	0.407795
NDP	Norrie disease (pseudoglioma)	0	8	0.405716
BHLHB3		1	14	0.405715
STAM	signal transducing adaptor molecule (SH3 domain and ITAM motif) 1	2	7	0.405715
ANP32A	acidic (leucine-rich) nuclear phosphoprotein 32 family, member A	0	1	0.405714
CCT6B	chaperonin containing TCP1, subunit 6B (zeta 2)	0	1	0.405714
CEBPE	CCAAT/enhancer binding protein (C/EBP), epsilon	0	1	0.405714
CSPG5	chondroitin sulfate proteoglycan 5 (neuroglycan C)	0	3	0.405714
EPS15	epidermal growth factor receptor pathway substrate 15	1	15	0.405714
GPX7	glutathione peroxidase 7	2	4	0.405714
IGSF8	immunoglobulin superfamily, member 8	0	1	0.405714
KIAA1370		0	5	0.405714
ME3	malic enzyme 3, NADP(+)-dependent, mitochondrial	2	1	0.405714
MYH3	myosin, heavy chain 3, skeletal muscle, embryonic	2	1	0.405714
PTPRD	protein tyrosine phosphatase, receptor type, D	0	26	0.405714
SCG5	secretogranin V (7B2 protein)	0	4	0.405714
TMEM100	transmembrane protein 100	0	9	0.405714
TMSB4X	thymosin beta 4, X-linked	1	4	0.405714
WNT7A	wingless-type MMTV integration site family, member 7A	5	3	0.405714
YWHAH	tyrosine 3-monooxygenase/tryptophan 5-monooxygenase activation protein, eta polypeptide	3	10	0.405714
ZIC5	Zic family member 5	0	15	0.403792
RUNX1T1	runt-related transcription factor 1; translocated to, 1 (cyclin D-related)	2	12	0.403314
FRY	furry homolog (Drosophila)	0	11	0.403097
RELN	reelin	2	11	0.403097
KBTBD8	kelch repeat and BTB (POZ) domain containing 8	0	19	0.402686
AGAP3	ArfGAP with GTPase domain, ankyrin repeat and PH domain 3	0	9	0.40252
ASH1L	ash1 (absent, small, or homeotic)-like (Drosophila)	2	18	0.40252
DRD1	dopamine receptor D1	3	9	0.40252
ESRRA	estrogen-related receptor alpha	0	9	0.40252
DLG2	discs, large homolog 2 (Drosophila)	0	27	0.402519
TMEM55B	transmembrane protein 55B	0	7	0.401615
CIT	citron (rho-interacting, serine/threonine kinase 21)	0	20	0.401413
RAD23B	RAD23 homolog B (S. cerevisiae)	2	19	0.40119
LMO4	LIM domain only 4	0	6	0.400942
CAMTA1	calmodulin binding transcription activator 1	0	23	0.400736
ZCCHC2	zinc finger, CCHC domain containing 2	0	16	0.400353
GRLF1		3	5	0.4
LIN28B	lin-28 homolog B (C. elegans)	0	25	0.4
PEX13	peroxisomal biogenesis factor 13	1	5	0.4
UBR5	ubiquitin protein ligase E3 component n-recognin 5	1	10	0.4
NPTN	neuroplastin	0	9	0.399374
PMP22	peripheral myelin protein 22	0	9	0.399374
PIK3R3	phosphoinositide-3-kinase, regulatory subunit 3 (gamma)	39	22	0.399233
ADM	adrenomedullin	1	8	0.398597
RANBP3	RAN binding protein 3	0	8	0.398597
ZHX1	zinc fingers and homeoboxes 1	0	12	0.398597
TSG101	tumor susceptibility 101	1	4	0.398596
WBP11	WW domain binding protein 11	1	4	0.398596
DDX3Y	DEAD (Asp-Glu-Ala-Asp) box helicase 3, Y-linked	1	18	0.397821
MAPK10	mitogen-activated protein kinase 10	23	7	0.3976
NONO	non-POU domain containing, octamer-binding	0	7	0.3976
OSBPL11	oxysterol binding protein-like 11	0	14	0.3976
RNF44	ring finger protein 44	0	17	0.397366
ARHGAP20	Rho GTPase activating protein 20	0	15	0.396279
CNR1	cannabinoid receptor 1 (brain)	1	21	0.396279
HNRNPU	heterogeneous nuclear ribonucleoprotein U (scaffold attachment factor A)	1	18	0.396279
PFN1	profilin 1	2	3	0.396279
PPM1D	protein phosphatase, Mg2+/Mn2+ dependent, 1D	1	9	0.396279
STC1	stanniocalcin 1	0	24	0.396279
TMEM49		0	9	0.396279
TPPP3	tubulin polymerization-promoting protein family member 3	0	3	0.396279
C15ORF21		0	6	0.396278
CHD4	chromodomain helicase DNA binding protein 4	0	6	0.396278
PLCL2	phospholipase C-like 2	0	6	0.396278
SESN1	sestrin 1	1	12	0.396278
ZFAND6	zinc finger, AN1-type domain 6	0	6	0.396278
ZIC2	Zic family member 2	1	6	0.396278
BCL7A	B-cell CLL/lymphoma 7A	0	20	0.395819
CSF1	colony stimulating factor 1 (macrophage)	2	11	0.395443
EGR2	early growth response 2	0	11	0.395443
NRAS	neuroblastoma RAS viral (v-ras) oncogene homolog	30	11	0.395443
BACH2	BTB and CNC homology 1, basic leucine zipper transcription factor 2	0	28	0.39464
CNIH2	cornichon family AMPA receptor auxiliary protein 2	0	5	0.394446
TLN2	talin 2	1	10	0.394444
GPR158	G protein-coupled receptor 158	0	17	0.394123
PICALM	phosphatidylinositol binding clathrin assembly protein	0	12	0.393988
SLC20A1	solute carrier family 20 (phosphate transporter), member 1	0	7	0.393662
VSNL1	visinin-like 1	0	7	0.393662
HCN1	hyperpolarization activated cyclic nucleotide-gated potassium channel 1	0	16	0.39342
FNDC3B	fibronectin type III domain containing 3B	0	25	0.393352
CHUK	conserved helix-loop-helix ubiquitous kinase	21	11	0.392955
MEX3C	mex-3 RNA binding family member C	0	13	0.392766
ARL8B	ADP-ribosylation factor-like 8B	0	17	0.39252
CDC42	cell division cycle 42	21	14	0.391725
ARF5	ADP-ribosylation factor 5	0	4	0.391724
ASNA1	arsA arsenite transporter, ATP-binding, homolog 1 (bacterial)	0	2	0.391724
CSNK2A2	casein kinase 2, alpha prime polypeptide	3	4	0.391724
EIF2C4		0	20	0.391724
GPATCH1	G patch domain containing 1	0	2	0.391724
GPR22	G protein-coupled receptor 22	0	2	0.391724
HTATSF1	HIV-1 Tat specific factor 1	0	2	0.391724
KCNJ12	potassium inwardly-rectifying channel, subfamily J, member 12	0	4	0.391724
MNT	MNT, MAX dimerization protein	0	16	0.391724
RAD54L	RAD54-like (S. cerevisiae)	1	2	0.391724
XRN2	5'-3' exoribonuclease 2	1	4	0.391724
DAG1	dystroglycan 1 (dystrophin-associated glycoprotein 1)	5	19	0.391015
PURA	purine-rich element binding protein A	0	13	0.390688
EP300	E1A binding protein p300	12	11	0.3905
KIAA2022	KIAA2022	0	31	0.390421
SLC12A5	solute carrier family 12 (potassium/chloride transporter), member 5	0	16	0.390043
LIN7C	lin-7 homolog C (C. elegans)	0	21	0.389804
UBR3	ubiquitin protein ligase E3 component n-recognin 3 (putative)	0	14	0.389804
DDX3X	DEAD (Asp-Glu-Ala-Asp) box helicase 3, X-linked	1	22	0.389283
ADRB1	adrenoceptor beta 1	6	10	0.389041
DYNC1LI2	dynein, cytoplasmic 1, light intermediate chain 2	2	20	0.389041
LYSMD2	LysM, putative peptidoglycan-binding, domain containing 2	0	5	0.389041
ZNF292	zinc finger protein 292	0	10	0.389041
VEGFA	vascular endothelial growth factor A	8	16	0.388377
FAM46A	family with sequence similarity 46, member A	0	26	0.387611
ITGB8	integrin, beta 8	7	26	0.387611
PPM1E	protein phosphatase, Mg2+/Mn2+ dependent, 1E	0	21	0.387273
AP3S1	adaptor-related protein complex 3, sigma 1 subunit	1	6	0.387272
ZNF536	zinc finger protein 536	0	6	0.387272
CCNJ	cyclin J	0	19	0.38681
MKRN1	makorin ring finger protein 1	0	16	0.386723
ROBO2	roundabout, axon guidance receptor, homolog 2 (Drosophila)	1	10	0.386395
HHIP	hedgehog interacting protein	3	7	0.386021
KCTD1	potassium channel tetramerization domain containing 1	0	7	0.386021
NCKAP1	NCK-associated protein 1	1	7	0.386021
ZNF281	zinc finger protein 281	0	7	0.386021
RND3	Rho family GTPase 3	0	14	0.386019
ZNF217	zinc finger protein 217	0	11	0.385679
UBE2R2	ubiquitin-conjugating enzyme E2R 2	1	15	0.38552
CLK2	CDC-like kinase 2	0	4	0.385085
CNIH		0	8	0.385085
LOX	lysyl oxidase	0	4	0.385085
MARCH2	membrane-associated ring finger (C3HC4) 2, E3 ubiquitin protein ligase	0	4	0.385085
MPHOSPH9	M-phase phosphoprotein 9	0	4	0.385085
NFE2L2	nuclear factor, erythroid 2-like 2	1	4	0.385085
SLC35F3	solute carrier family 35, member F3	0	8	0.385085
GHR	growth hormone receptor	3	12	0.385084
C13ORF23		0	9	0.384361
NHS	Nance-Horan syndrome (congenital cataracts and dental anomalies)	0	18	0.384361
CHAC1	ChaC, cation transport regulator homolog 1 (E. coli)	0	5	0.383785
LCP2	lymphocyte cytosolic protein 2 (SH2 domain containing leukocyte protein of 76kDa)	3	5	0.383785
PCDH8	protocadherin 8	0	5	0.383785
TBC1D9	TBC1 domain family, member 9 (with GRAM domain)	0	10	0.383783
SMAP1	small ArfGAP 1	1	12	0.382922
VTI1A	vesicle transport through interaction with t-SNAREs 1A	1	18	0.382922
TEAD1	TEA domain family member 1 (SV40 transcriptional enhancer factor)	0	30	0.382921
TMEM64	transmembrane protein 64	0	13	0.382591
COL21A1	collagen, type XXI, alpha 1	0	7	0.382307
MAP3K12	mitogen-activated protein kinase kinase kinase 12	1	8	0.381848
STX1A	syntaxin 1A (brain)	1	8	0.381848
ONECUT2	one cut homeobox 2	0	35	0.381574
AZIN1	antizyme inhibitor 1	0	15	0.380357
C14ORF101		0	15	0.380357
TMEM135	transmembrane protein 135	0	16	0.380251
CCT6A	chaperonin containing TCP1, subunit 6A (zeta 1)	0	4	0.378667
DHX29	DEAH (Asp-Glu-Ala-His) box polypeptide 29	0	2	0.378667
EPHA1	EPH receptor A1	1	2	0.378667
HOXA1	homeobox A1	0	13	0.378667
JAG1	jagged 1	1	13	0.378667
MFAP2	microfibrillar-associated protein 2	0	2	0.378667
NME4	NME/NM23 nucleoside diphosphate kinase 4	3	4	0.378667
SNAP25	synaptosomal-associated protein, 25kDa	1	11	0.378667
TUBB2A	tubulin, beta 2A class IIa	3	2	0.378667
WAPAL	wings apart-like homolog (Drosophila)	0	17	0.378667
ARHGAP15	Rho GTPase activating protein 15	0	1	0.378666
CRYAB	crystallin, alpha B	1	1	0.378666
GSC	goosecoid homeobox	0	1	0.378666
MICAL1	microtubule associated monooxygenase, calponin and LIM domain containing 1	0	1	0.378666
MNS1	meiosis-specific nuclear structural 1	0	1	0.378666
ODF1	outer dense fiber of sperm tails 1	0	1	0.378666
PNN	pinin, desmosome associated protein	1	5	0.378666
RAB33A	RAB33A, member RAS oncogene family	0	1	0.378666
RARS	arginyl-tRNA synthetase	1	1	0.378666
SRY	sex determining region Y	0	1	0.378666
ZFP161		0	9	0.378666
CA2	carbonic anhydrase II	5	6	0.378665
HOMER2	homer homolog 2 (Drosophila)	0	6	0.378665
MARCH3	membrane-associated ring finger (C3HC4) 3, E3 ubiquitin protein ligase	0	6	0.378665
RNF217	ring finger protein 217	0	6	0.378665
MTMR4	myotubularin related protein 4	0	18	0.37727
SLC39A10	solute carrier family 39 (zinc transporter), member 10	0	17	0.377188
RAPGEF2	Rap guanine nucleotide exchange factor (GEF) 2	1	16	0.377095
PRDM1	PR domain containing 1, with ZNF domain	0	15	0.376991
MARK1	MAP/microtubule affinity-regulating kinase 1	0	14	0.376872
CADM2	cell adhesion molecule 2	0	13	0.376735
SCML2	sex comb on midleg-like 2 (Drosophila)	0	13	0.376735
PHLPPL		0	23	0.376484
TUSC2	tumor suppressor candidate 2	0	11	0.376385
MAP3K8	mitogen-activated protein kinase kinase kinase 8	3	9	0.375883
PDE3B	phosphodiesterase 3B, cGMP-inhibited	3	9	0.375883
PTP4A1	protein tyrosine phosphatase type IVA, member 1	0	16	0.375537
HOXA9	homeobox A9	0	8	0.375536
OTUB1	OTU domain, ubiquitin aldehyde binding 1	0	8	0.375536
DCUN1D4	DCN1, defective in cullin neddylation 1, domain containing 4	0	23	0.375402
ADD3	adducin 3 (gamma)	0	14	0.375094
RMND5A	required for meiotic nuclear division 5 homolog A (S. cerevisiae)	0	14	0.375094
TRIB2	tribbles pseudokinase 2	0	13	0.374822
CNOT7	CCR4-NOT transcription complex, subunit 7	1	12	0.374506
FZD8	frizzled family receptor 8	4	6	0.374506
LAMC1	laminin, gamma 1 (formerly LAMB2)	7	18	0.374506
MTMR1	myotubularin related protein 1	1	6	0.374506
R3HDM2	R3H domain containing 2	0	6	0.374506
SEMA6A	sema domain, transmembrane domain (TM), and cytoplasmic domain, (semaphorin) 6A	1	18	0.374506
SRPK2	SRSF protein kinase 2	0	12	0.374506
USP6	ubiquitin specific peptidase 6 (Tre-2 oncogene)	0	18	0.374506
RAB14	RAB14, member RAS oncogene family	0	17	0.374264
ELOVL4	ELOVL fatty acid elongase 4	0	11	0.374132
LY75	lymphocyte antigen 75	0	11	0.374132
C20ORF39		0	5	0.373685
REV1	REV1, polymerase (DNA directed)	0	5	0.373685
RFX6	regulatory factor X, 6	0	5	0.373685
TSHZ1	teashirt zinc finger homeobox 1	0	9	0.373138
CDK6	cyclin-dependent kinase 6	9	33	0.372644
ADAMTS3	ADAM metallopeptidase with thrombospondin type 1 motif, 3	0	12	0.37246
FOS	FBJ murine osteosarcoma viral oncogene homolog	8	8	0.372459
HECTD1	HECT domain containing E3 ubiquitin protein ligase 1	0	8	0.372459
MDFI	MyoD family inhibitor	0	4	0.372459
SEC11A	SEC11 homolog A (S. cerevisiae)	1	4	0.372459
ST6GALNAC5	ST6 (alpha-N-acetyl-neuraminyl-2,3-beta-galactosyl-1,3)-N-acetylgalactosaminide alpha-2,6-sialyltransferase 5	2	4	0.372459
PAN3	PAN3 poly(A) specific ribonuclease subunit homolog (S. cerevisiae)	0	23	0.372194
FAM126B	family with sequence similarity 126, member B	0	15	0.372053
RORB	RAR-related orphan receptor B	1	11	0.371904
CTGF	connective tissue growth factor	0	7	0.371589
R3HDM1	R3H domain containing 1	0	7	0.371589
TOPORS	topoisomerase I binding, arginine/serine-rich, E3 ubiquitin protein ligase	0	7	0.371589
GRM7	glutamate receptor, metabotropic 7	1	10	0.371242
SIPA1L2	signal-induced proliferation-associated 1 like 2	0	10	0.371242
CAMK2N2	calcium/calmodulin-dependent protein kinase II inhibitor 2	0	6	0.370436
CDC2L5		0	6	0.370436
ITGA9	integrin, alpha 9	7	6	0.370436
CLDND1	claudin domain containing 1	0	9	0.370435
CNTNAP1	contactin associated protein 1	1	9	0.370435
COL16A1	collagen, type XVI, alpha 1	0	3	0.370435
DYRK4	dual-specificity tyrosine-(Y)-phosphorylation regulated kinase 4	0	3	0.370435
HOXA10	homeobox A10	0	9	0.370435
KRT3	keratin 3	0	3	0.370435
SMARCAD1	SWI/SNF-related, matrix-associated actin-dependent regulator of chromatin, subfamily a, containing DEAD/H box 1	0	12	0.370435
STAG2	stromal antigen 2	1	12	0.370435
USP2	ubiquitin specific peptidase 2	0	3	0.370435
CREBL2	cAMP responsive element binding protein-like 2	0	20	0.370033
FEM1C	fem-1 homolog c (C. elegans)	0	17	0.369961
AKAP7	A kinase (PRKA) anchor protein 7	0	14	0.36986
ITPR1	inositol 1,4,5-trisphosphate receptor, type 1	13	11	0.369704
NLGN1	neuroligin 1	1	11	0.369704
RPS6KA5	ribosomal protein S6 kinase, 90kDa, polypeptide 5	3	11	0.369704
TFAP2C	transcription factor AP-2 gamma (activating enhancer binding protein 2 gamma)	0	8	0.369432
DACH1	dachshund homolog 1 (Drosophila)	0	16	0.369431
ADAMTS6	ADAM metallopeptidase with thrombospondin type 1 motif, 6	0	21	0.369288
RSBN1	round spermatid basic protein 1	0	21	0.369288
ZNF532	zinc finger protein 532	0	10	0.368832
CHP		13	15	0.368831
EFNA5	ephrin-A5	1	5	0.36883
YES1	v-yes-1 Yamaguchi sarcoma viral oncogene homolog 1	2	17	0.36855
PDE4B	phosphodiesterase 4B, cAMP-specific	1	12	0.368433
PRPF40A	PRP40 pre-mRNA processing factor 40 homolog A (S. cerevisiae)	1	7	0.368147
SLC43A2	solute carrier family 43 (amino acid system L transporter), member 2	0	7	0.368147
WASL	Wiskott-Aldrich syndrome-like	7	16	0.367936
MAP2K4	mitogen-activated protein kinase kinase 4	7	18	0.36777
DAZAP2	DAZ associated protein 2	0	11	0.367529
DYNLT3	dynein, light chain, Tctex-type 3	0	11	0.367529
IGF1R	insulin-like growth factor 1 receptor	10	26	0.367363
GIGYF1	GRB10 interacting GYF protein 1	0	17	0.367148
SLC2A3	solute carrier family 2 (facilitated glucose transporter), member 3	0	17	0.367148
RAB8B	RAB8B, member RAS oncogene family	0	23	0.366967
ARPC2	actin related protein 2/3 complex, subunit 2, 34kDa	5	4	0.366452
TAC1	tachykinin, precursor 1	1	4	0.366452
TNKS1BP1	tankyrase 1 binding protein 1, 182kDa	0	4	0.366452
C17ORF80	chromosome 17 open reading frame 80	0	2	0.366451
CAMK2G	calcium/calmodulin-dependent protein kinase II gamma	11	16	0.366451
CLPTM1L	CLPTM1-like	0	2	0.366451
CPEB1	cytoplasmic polyadenylation element binding protein 1	3	14	0.366451
FAM160A2	family with sequence similarity 160, member A2	0	2	0.366451
FNTA	farnesyltransferase, CAAX box, alpha	0	6	0.366451
HOXC11	homeobox C11	0	8	0.366451
ILK	integrin-linked kinase	4	2	0.366451
LSM14A	LSM14A, SCD6 homolog A (S. cerevisiae)	0	12	0.366451
NGF	nerve growth factor (beta polypeptide)	3	2	0.366451
PSMD11	proteasome (prosome, macropain) 26S subunit, non-ATPase, 11	1	2	0.366451
TCERG1	transcription elongation regulator 1	1	8	0.366451
TRAM1	translocation associated membrane protein 1	1	10	0.366451
USP9Y	ubiquitin specific peptidase 9, Y-linked	0	10	0.366451
SOCS5	suppressor of cytokine signaling 5	1	17	0.365758
CCND2	cyclin D2	5	24	0.365469
SEMA6D	sema domain, transmembrane domain (TM), and cytoplasmic domain, (semaphorin) 6D	1	24	0.365469
CBFA2T3	core-binding factor, runt domain, alpha subunit 2; translocated to, 3	0	11	0.36538
HLF	hepatic leukemia factor	0	22	0.36538
COL4A5	collagen, type IV, alpha 5	0	9	0.365143
ESCO1	establishment of sister chromatid cohesion N-acetyltransferase 1	0	9	0.365143
GRB10	growth factor receptor-bound protein 10	0	18	0.365143
ARHGDIA	Rho GDP dissociation inhibitor (GDI) alpha	2	7	0.364771
EGLN1	egl-9 family hypoxia-inducible factor 1	2	7	0.364771
TLK2	tousled-like kinase 2	0	7	0.364771
USP6NL	USP6 N-terminal like	0	12	0.364492
AK3L1		2	5	0.364103
LOC440093		0	5	0.364103
ACVR1C	activin A receptor, type IC	1	8	0.363521
TOP1	topoisomerase (DNA) I	0	8	0.363521
TET1	tet methylcytosine dioxygenase 1	0	11	0.363255
GALNT7	UDP-N-acetyl-alpha-D-galactosamine:polypeptide N-acetylgalactosaminyltransferase 7 (GalNAc-T7)	2	14	0.363105
RNF111	ring finger protein 111	0	14	0.363105
CUL5	cullin 5	1	20	0.362939
CCDC28A	coiled-coil domain containing 28A	0	6	0.362554
NEFH	neurofilament, heavy polypeptide	1	6	0.362554
SEPT7	septin 7	0	6	0.362554
DCLK1	doublecortin-like kinase 1	0	18	0.362553
GPR85	G protein-coupled receptor 85	0	18	0.362553
KRT5	keratin 5	0	3	0.362553
OXR1	oxidation resistance 1	0	12	0.362553
PCOLCE2	procollagen C-endopeptidase enhancer 2	0	3	0.362553
ZNF274	zinc finger protein 274	1	3	0.362553
PRKAA1	protein kinase, AMP-activated, alpha 1 catalytic subunit	5	16	0.362072
COPS7B	COP9 signalosome subunit 7B	0	13	0.361961
IKZF4	IKAROS family zinc finger 4 (Eos)	0	20	0.361783
SH3GL2	SH3-domain GRB2-like 2	1	10	0.361783
ETF1	eukaryotic translation termination factor 1	0	17	0.361648
FAM70A		0	14	0.361455
SEMA4C	sema domain, immunoglobulin domain (Ig), transmembrane domain (TM) and short cytoplasmic domain, (semaphorin) 4C	1	7	0.361454
KLF12	Kruppel-like factor 12	0	33	0.361156
STARD13	StAR-related lipid transfer (START) domain containing 13	0	15	0.361017
ADCY3	adenylate cyclase 3	16	4	0.360635
AP2A1	adaptor-related protein complex 2, alpha 1 subunit	2	4	0.360635
C6ORF204		0	4	0.360635
ZSWIM3	zinc finger, SWIM-type containing 3	0	4	0.360635
PHACTR2	phosphatase and actin regulator 2	0	17	0.360298
RARB	retinoic acid receptor, beta	3	13	0.360196
D4S234E		0	10	0.359494
SGMS1	sphingomyelin synthase 1	2	10	0.359494
MSL2	male-specific lethal 2 homolog (Drosophila)	0	15	0.359493
ADAMTS8	ADAM metallopeptidase with thrombospondin type 1 motif, 8	0	5	0.359492
CSK	c-src tyrosine kinase	5	5	0.359492
EFNB2	ephrin-B2	1	21	0.359277
YWHAG	tyrosine 3-monooxygenase/tryptophan 5-monooxygenase activation protein, gamma polypeptide	3	16	0.35921
CALCR	calcitonin receptor	1	12	0.358736
IL1RAPL1	interleukin 1 receptor accessory protein-like 1	0	7	0.358198
PNRC1	proline-rich nuclear receptor coactivator 1	0	7	0.358198
RANBP2	RAN binding protein 2	1	7	0.358198
USP15	ubiquitin specific peptidase 15	0	14	0.358198
MSL1	male-specific lethal 1 homolog (Drosophila)	0	15	0.357983
ASF1A	anti-silencing function 1A histone chaperone	0	8	0.357796
GPATCH8	G patch domain containing 8	0	17	0.357629
WWC2	WW and C2 domain containing 2	0	17	0.357629
PHF3	PHD finger protein 3	0	9	0.357483
MARCKS	myristoylated alanine-rich protein kinase C substrate	1	10	0.357232
ARHGEF12	Rho guanine nucleotide exchange factor (GEF) 12	3	21	0.357125
ARFGEF1	ADP-ribosylation factor guanine nucleotide-exchange factor 1 (brefeldin A-inhibited)	0	11	0.357028
FBN2	fibrillin 2	0	13	0.356715
SRPK1	SRSF protein kinase 1	0	14	0.356591
WDR82	WD repeat domain 82	0	18	0.356237
CCDC6	coiled-coil domain containing 6	2	22	0.356012
NR4A3	nuclear receptor subfamily 4, group A, member 3	0	22	0.356012
HIPK1	homeodomain interacting protein kinase 1	0	25	0.35589
CSNK1A1L	casein kinase 1, alpha 1-like	2	6	0.355001
GOT2	glutamic-oxaloacetic transaminase 2, mitochondrial	7	7	0.355001
TRIM3	tripartite motif containing 3	0	7	0.355001
C10ORF97		0	3	0.355
CCL3	chemokine (C-C motif) ligand 3	4	3	0.355
CXCL2	chemokine (C-X-C motif) ligand 2	3	5	0.355
DAD1	defender against cell death 1	3	3	0.355
DAXX	death-domain associated protein	2	1	0.355
DDI2	DNA-damage inducible 1 homolog 2 (S. cerevisiae)	0	3	0.355
DMXL1	Dmx-like 1	0	10	0.355
DUSP5	dual specificity phosphatase 5	1	9	0.355
FAP	fibroblast activation protein, alpha	0	2	0.355
GON4L	gon-4-like (C. elegans)	0	2	0.355
HECW1	HECT, C2 and WW domain containing E3 ubiquitin protein ligase 1	0	11	0.355
KIF1C	kinesin family member 1C	0	4	0.355
MESDC1	mesoderm development candidate 1	0	5	0.355
MIZF		0	1	0.355
MLLT11	myeloid/lymphoid or mixed-lineage leukemia (trithorax homolog, Drosophila); translocated to, 11	0	4	0.355
NDEL1	nudE neurodevelopment protein 1-like 1	0	11	0.355
NTS	neurotensin	1	3	0.355
PHAX	phosphorylated adaptor for RNA export	1	5	0.355
RPS3	ribosomal protein S3	1	1	0.355
SEC11C	SEC11 homolog C (S. cerevisiae)	1	1	0.355
SLC16A6	solute carrier family 16, member 6	0	4	0.355
SNRPB	small nuclear ribonucleoprotein polypeptides B and B1	2	4	0.355
TMEM110	transmembrane protein 110	0	4	0.355
TSGA14		0	16	0.355
VRK2	vaccinia related kinase 2	0	1	0.355
LHX8	LIM homeobox 8	0	8	0.354999
RNF19A	ring finger protein 19A, RBR E3 ubiquitin protein ligase	0	12	0.354999
RNF2	ring finger protein 2	0	12	0.354999
SNX4	sorting nexin 4	0	8	0.354999
SUV420H1	suppressor of variegation 4-20 homolog 1 (Drosophila)	1	12	0.354999
YWHAB	tyrosine 3-monooxygenase/tryptophan 5-monooxygenase activation protein, beta polypeptide	3	12	0.354999
MECP2	methyl CpG binding protein 2 (Rett syndrome)	0	33	0.354329
RPS6KA3	ribosomal protein S6 kinase, 90kDa, polypeptide 3	6	24	0.354078
BCL2L11	BCL2-like 11 (apoptosis facilitator)	0	20	0.353894
GCC2	GRIP and coiled-coil domain containing 2	0	12	0.353161
PCDH9	protocadherin 9	0	12	0.353161
PPP2R5E	protein phosphatase 2, regulatory subunit B', epsilon isoform	2	12	0.353161
SLITRK1	SLIT and NTRK-like family, member 1	0	12	0.353161
CD69	CD69 molecule	0	9	0.352552
MYST4		0	9	0.352552
TESK2	testis-specific kinase 2	0	9	0.352552
TNFSF11	tumor necrosis factor (ligand) superfamily, member 11	1	9	0.352552
GATA3	GATA binding protein 3	0	8	0.352248
MAPK9	mitogen-activated protein kinase 9	24	8	0.352248
PCDH1	protocadherin 1	0	8	0.352248
NCOA1	nuclear receptor coactivator 1	0	15	0.352066
ROBO1	roundabout, axon guidance receptor, homolog 1 (Drosophila)	1	13	0.351619
ZFAND5	zinc finger, AN1-type domain 5	0	12	0.351341
C15ORF27	chromosome 15 open reading frame 27	0	6	0.351339
SPTBN2	spectrin, beta, non-erythrocytic 2	0	6	0.351339
USP42	ubiquitin specific peptidase 42	0	6	0.351339
CS	citrate synthase	3	11	0.351012
JMJD1B		0	11	0.351012
SACS	spastic ataxia of Charlevoix-Saguenay (sacsin)	0	11	0.351012
DHDDS	dehydrodolichyl diphosphate synthase	1	15	0.350617
FAM76B	family with sequence similarity 76, member B	0	15	0.350617
TANC2	tetratricopeptide repeat, ankyrin repeat and coiled-coil containing 2	0	25	0.350617
WNK3	WNK lysine deficient protein kinase 3	0	15	0.350617
AHDC1	AT hook, DNA binding motif, containing 1	0	5	0.350616
FLJ14213		0	5	0.350616
GRM5	glutamate receptor, metabotropic 5	6	5	0.350616
ABCA1	ATP-binding cassette, sub-family A (ABC1), member 1	1	18	0.350137
AMPH	amphiphysin	1	9	0.350137
CDC25B	cell division cycle 25B	3	9	0.350137
MED13L	mediator complex subunit 13-like	0	16	0.349539
KCNH4	potassium voltage-gated channel, subfamily H (eag-related), member 4	0	4	0.349538
PFDN4	prefoldin subunit 4	0	4	0.349538
VDAC2	voltage-dependent anion channel 2	3	4	0.349538
MYH10	myosin, heavy chain 10, non-muscle	3	11	0.34905
PDCD4	programmed cell death 4 (neoplastic transformation inhibitor)	0	11	0.34905
FBRS	fibrosin	0	7	0.348773
HIPK3	homeodomain interacting protein kinase 3	0	7	0.348773
OTX2	orthodenticle homeobox 2	0	7	0.348773
RNF146	ring finger protein 146	0	7	0.348773
TYRO3	TYRO3 protein tyrosine kinase	0	7	0.348773
KAT2B	K(lysine) acetyltransferase 2B	1	14	0.348772
CA10	carbonic anhydrase X	0	10	0.348467
PHF15		0	22	0.348078
EIF2C2		0	6	0.347756
EZH1	enhancer of zeste homolog 1 (Drosophila)	0	12	0.347756
PDS5A	PDS5, regulator of cohesion maintenance, homolog A (S. cerevisiae)	0	15	0.347756
RSRC2	arginine/serine-rich coiled-coil 2	0	6	0.347756
XKR4	XK, Kell blood group complex subunit-related family, member 4	0	9	0.347756
CCL1	chemokine (C-C motif) ligand 1	2	3	0.347755
FOXL2	forkhead box L2	0	3	0.347755
TOMM40	translocase of outer mitochondrial membrane 40 homolog (yeast)	1	3	0.347755
RCOR3	REST corepressor 3	0	14	0.347249
ARHGEF17	Rho guanine nucleotide exchange factor (GEF) 17	0	8	0.34687
KIAA0430	KIAA0430	0	13	0.346667
RPRD1A	regulation of nuclear pre-mRNA domain containing 1A	0	18	0.346576
FGF9	fibroblast growth factor 9	4	5	0.346341
HOXD1	homeobox D1	0	10	0.346341
NOL4	nucleolar protein 4	0	10	0.346341
RIC8A	RIC8 guanine nucleotide exchange factor A	0	5	0.346341
ZER1	zyg-11 related, cell cycle regulator	0	10	0.346341
FAM116A		0	17	0.346093
ZRANB2	zinc finger, RAN-binding domain containing 2	0	12	0.34599
GATM	glycine amidinotransferase (L-arginine:glycine amidinotransferase)	3	7	0.345739
PTP4A2	protein tyrosine phosphatase type IVA, member 2	0	7	0.345739
RGAG1	retrotransposon gag domain containing 1	0	7	0.345739
ZBTB41	zinc finger and BTB domain containing 41	0	21	0.345739
ZCCHC3	zinc finger, CCHC domain containing 3	0	11	0.345193
GOLGA1	golgin A1	0	13	0.345047
COL6A3	collagen, type VI, alpha 3	3	8	0.344243
DNMT1	DNA (cytosine-5-)-methyltransferase 1	2	4	0.344243
EDN1	endothelin 1	4	8	0.344243
EIF3J	eukaryotic translation initiation factor 3, subunit J	1	10	0.344243
FBXL19	F-box and leucine-rich repeat protein 19	0	10	0.344243
LPHN1	latrophilin 1	0	14	0.344243
RXFP2	relaxin/insulin-like family peptide receptor 2	1	4	0.344243
UBE2I	ubiquitin-conjugating enzyme E2I	2	8	0.344243
ARPC1A	actin related protein 2/3 complex, subunit 1A, 41kDa	5	2	0.344242
DGKA	diacylglycerol kinase, alpha 80kDa	4	2	0.344242
DNAJC7	DnaJ (Hsp40) homolog, subfamily C, member 7	0	2	0.344242
GABRA6	gamma-aminobutyric acid (GABA) A receptor, alpha 6	1	2	0.344242
SPTAN1	spectrin, alpha, non-erythrocytic 1	1	2	0.344242
TBCA	tubulin folding cofactor A	0	2	0.344242
WAS	Wiskott-Aldrich syndrome	7	2	0.344242
COL3A1	collagen, type III, alpha 1	4	6	0.344241
ETNK1	ethanolamine kinase 1	2	20	0.343203
CCNE2	cyclin E2	6	9	0.343087
HOXB3	homeobox B3	0	9	0.343087
REEP1	receptor accessory protein 1	0	18	0.343087
SYPL1	synaptophysin-like 1	0	9	0.343087
USP32	ubiquitin specific peptidase 32	0	9	0.343087
ACP2	acid phosphatase 2, lysosomal	2	7	0.342759
ACVR2B	activin A receptor, type IIB	2	28	0.342759
EPAS1	endothelial PAS domain protein 1	2	14	0.342758
CEP170	centrosomal protein 170kDa	0	12	0.342512
COL15A1	collagen, type XV, alpha 1	1	5	0.34217
RAB10	RAB10, member RAS oncogene family	0	15	0.342169
BZRAP1	benzodiazapine receptor (peripheral) associated protein 1	0	10	0.342168
SENP2	SUMO1/sentrin/SMT3 specific peptidase 2	2	10	0.342168
STRN3	striatin, calmodulin binding protein 3	0	10	0.342168
LPHN3	latrophilin 3	0	13	0.341852
OGT	O-linked N-acetylglucosamine (GlcNAc) transferase	0	13	0.341852
CDCA4	cell division cycle associated 4	0	8	0.341654
STK33	serine/threonine kinase 33	0	8	0.341654
BMI1	BMI1 polycomb ring finger oncogene	0	11	0.341421
MEF2D	myocyte enhancer factor 2D	0	22	0.341421
SOX4	SRY (sex determining region Y)-box 4	0	14	0.341288
PPP1R9A	protein phosphatase 1, regulatory subunit 9A	0	23	0.341096
APCDD1	adenomatosis polyposis coli down-regulated 1	0	6	0.3408
BRPF1	bromodomain and PHD finger containing, 1	0	6	0.3408
C14ORF109		0	3	0.3408
GPBP1	GC-rich promoter binding protein 1	0	3	0.3408
POPDC2	popeye domain containing 2	0	3	0.3408
ZFYVE9	zinc finger, FYVE domain containing 9	2	6	0.3408
DLL4	delta-like 4 (Drosophila)	1	9	0.340799
SP1	Sp1 transcription factor	2	25	0.340528
TBL1XR1	transducin (beta)-like 1 X-linked receptor 1	1	16	0.340375
KLHL20	kelch-like family member 20	0	10	0.34012
SFRS1		1	17	0.34
BAHD1	bromo adjacent homology domain containing 1	0	14	0.33983
KIAA0664		0	7	0.339829
FCHSD1	FCH and double SH3 domains 1	0	15	0.339442
PLAGL1	pleiomorphic adenoma gene-like 1	0	8	0.339105
CRH	corticotropin releasing hormone	2	4	0.339104
GNAI3	guanine nucleotide binding protein (G protein), alpha inhibiting activity polypeptide 3	11	12	0.339104
IL3	interleukin 3 (colony-stimulating factor, multiple)	6	4	0.339104
MDGA2	MAM domain containing glycosylphosphatidylinositol anchor 2	0	12	0.339104
PSD	pleckstrin and Sec7 domain containing	1	4	0.339104
RUNDC3A	RUN domain containing 3A	0	4	0.339104
TANK	TRAF family member-associated NFKB activator	1	4	0.339104
UBE2E3	ubiquitin-conjugating enzyme E2E 3	2	4	0.339104
MAP4K4	mitogen-activated protein kinase kinase kinase kinase 4	1	17	0.338807
LRRC8A	leucine rich repeat containing 8 family, member A	0	9	0.338543
RARG	retinoic acid receptor, gamma	0	9	0.338543
UPF2	UPF2 regulator of nonsense transcripts homolog (yeast)	1	9	0.338543
BEST1	bestrophin 1	0	5	0.338095
HOXC8	homeobox C8	0	11	0.33773
TNFAIP3	tumor necrosis factor, alpha-induced protein 3	1	12	0.337426
ARF4	ADP-ribosylation factor 4	0	6	0.337425
SAMD13	sterile alpha motif domain containing 13	0	6	0.337425
YWHAE	tyrosine 3-monooxygenase/tryptophan 5-monooxygenase activation protein, epsilon polypeptide	3	6	0.337425
SNX16	sorting nexin 16	0	13	0.337169
G3BP2	GTPase activating protein (SH3 domain) binding protein 2	0	15	0.336759
KIAA0355	KIAA0355	0	15	0.336759
SEC24A	SEC24 family member A	1	16	0.336592
TMEM117	transmembrane protein 117	0	8	0.336592
DNAJB9	DnaJ (Hsp40) homolog, subfamily B, member 9	0	9	0.336315
ERBB3	v-erb-b2 avian erythroblastic leukemia viral oncogene homolog 3	3	9	0.336315
MOSPD1	motile sperm domain containing 1	0	10	0.336095
ZNF644	zinc finger protein 644	0	10	0.336095
ARFIP1	ADP-ribosylation factor interacting protein 1	0	11	0.335914
AP1G1	adaptor-related protein complex 1, gamma 1 subunit	1	23	0.335836
CRK	v-crk avian sarcoma virus CT10 oncogene homolog	13	12	0.335764
SNF1LK		0	12	0.335764
PHTF2	putative homeodomain transcription factor 2	0	15	0.335434
SLC1A2	solute carrier family 1 (glial high affinity glutamate transporter), member 2	1	31	0.33539
MYCBP2	MYC binding protein 2, E3 ubiquitin protein ligase	0	5	0.334119
ORC5L		1	5	0.334119
ACCN2		0	11	0.334118
BCAT2	branched chain amino-acid transaminase 2, mitochondrial	4	3	0.334118
C11ORF30	chromosome 11 open reading frame 30	0	12	0.334118
C11ORF59		0	3	0.334118
C5ORF30	chromosome 5 open reading frame 30	0	12	0.334118
CHORDC1	cysteine and histidine-rich domain (CHORD) containing 1	0	2	0.334118
CREB1	cAMP responsive element binding protein 1	5	12	0.334118
EYA1	eyes absent homolog 1 (Drosophila)	0	12	0.334118
FAF1	Fas (TNFRSF6) associated factor 1	0	2	0.334118
GOLSYN		0	6	0.334118
GPC3	glypican 3	0	3	0.334118
ITSN2	intersectin 2	0	6	0.334118
KCNN2	potassium intermediate/small conductance calcium-activated channel, subfamily N, member 2	0	2	0.334118
LRFN2	leucine rich repeat and fibronectin type III domain containing 2	0	2	0.334118
NRBF2	nuclear receptor binding factor 2	0	8	0.334118
PRICKLE2	prickle homolog 2 (Drosophila)	1	24	0.334118
RASGEF1A	RasGEF domain family, member 1A	0	12	0.334118
SLC25A28	solute carrier family 25 (mitochondrial iron transporter), member 28	0	2	0.334118
TADA1L		0	3	0.334118
ABHD7		0	1	0.334117
C14ORF166	chromosome 14 open reading frame 166	0	1	0.334117
CLPP	caseinolytic mitochondrial matrix peptidase proteolytic subunit	0	1	0.334117
CRTC2	CREB regulated transcription coactivator 2	0	4	0.334117
DDR2	discoidin domain receptor tyrosine kinase 2	0	1	0.334117
JAG2	jagged 2	1	7	0.334117
KRTDAP	keratinocyte differentiation-associated protein	0	1	0.334117
NDUFA8	NADH dehydrogenase (ubiquinone) 1 alpha subcomplex, 8, 19kDa	5	1	0.334117
SENP5	SUMO1/sentrin specific peptidase 5	0	4	0.334117
MBNL2	muscleblind-like splicing regulator 2	0	21	0.333185
HMGB3	high mobility group box 3	0	14	0.332719
EPHA7	EPH receptor A7	1	12	0.332488
H3F3B	H3 histone, family 3B (H3.3B)	1	12	0.332488
ANKRD17	ankyrin repeat domain 17	0	9	0.331949
BCL6	B-cell CLL/lymphoma 6	0	9	0.331949
TIA1	TIA1 cytotoxic granule-associated RNA binding protein	0	8	0.331678
POU3F1	POU class 3 homeobox 1	0	7	0.331333
ZMYND11	zinc finger, MYND-type containing 11	0	14	0.331333
MLL2		0	13	0.331121
RSF1	remodeling and spacing factor 1	0	6	0.330875
LSM11	LSM11, U7 small nuclear RNA associated	0	11	0.330582
RFX4	regulatory factor X, 4 (influences HLA class II expression)	0	11	0.330582
EIF5A	eukaryotic translation initiation factor 5A	0	5	0.330232
NDN	necdin, melanoma antigen (MAGE) family member	0	5	0.330232
TMCC1	transmembrane and coiled-coil domain family 1	0	19	0.330031
DCX	doublecortin	0	28	0.329959
ARHGEF3	Rho guanine nucleotide exchange factor (GEF) 3	0	14	0.329958
CAB39	calcium binding protein 39	1	14	0.329958
C1ORF9		0	13	0.329643
TWF1	twinfilin actin-binding protein 1	0	13	0.329643
ESR1	estrogen receptor 1	0	20	0.329276
FCHSD2	FCH and double SH3 domains 2	0	12	0.329276
MIB1	mindbomb E3 ubiquitin protein ligase 1	0	20	0.329276
PPAP2B	phosphatidic acid phosphatase type 2B	6	12	0.329276
CHPT1	choline phosphotransferase 1	3	4	0.329275
GRM4	glutamate receptor, metabotropic 4	2	4	0.329275
XPOT	exportin, tRNA	1	4	0.329275
YBX2	Y box binding protein 2	0	4	0.329275
MTF1	metal-regulatory transcription factor 1	0	23	0.329068
CUL4B	cullin 4B	2	11	0.328842
COL12A1	collagen, type XII, alpha 1	1	14	0.328595
ST5	suppression of tumorigenicity 5	0	7	0.328594
NR3C1	nuclear receptor subfamily 3, group C, member 1 (glucocorticoid receptor)	1	17	0.328436
HBP1	HMG-box transcription factor 1	0	10	0.328324
PKIA	protein kinase (cAMP-dependent, catalytic) inhibitor alpha	0	10	0.328324
HSF5	heat shock transcription factor family member 5	0	13	0.328178
PHYHIPL	phytanoyl-CoA 2-hydroxylase interacting protein-like	0	9	0.327693
EIF4EBP1	eukaryotic translation initiation factor 4E binding protein 1	5	3	0.327692
ELK3	ELK3, ETS-domain protein (SRF accessory protein 2)	0	6	0.327692
KIF23	kinesin family member 23	0	6	0.327692
NKD1	naked cuticle homolog 1 (Drosophila)	1	6	0.327692
OSR1	odd-skipped related transciption factor 1	0	6	0.327692
PTMS	parathymosin	0	3	0.327692
SCG2	secretogranin II	0	3	0.327692
TMEFF1	transmembrane protein with EGF-like and two follistatin-like domains 1	0	6	0.327692
DLC1	deleted in liver cancer 1	0	14	0.327242
SYN2	synapsin II	0	14	0.327242
ST8SIA4	ST8 alpha-N-acetyl-neuraminide alpha-2,8-sialyltransferase 4	0	19	0.32703
CREB5	cAMP responsive element binding protein 5	3	24	0.326906
FAM134A	family with sequence similarity 134, member A	0	8	0.326906
IGSF1	immunoglobulin superfamily, member 1	0	8	0.326906
RTN1	reticulon 1	0	8	0.326906
SPRYD3	SPRY domain containing 3	0	8	0.326906
POU2F2	POU class 2 homeobox 2	0	13	0.326726
CUL3	cullin 3	1	18	0.326645
ELOVL1	ELOVL fatty acid elongase 1	0	5	0.326437
FBXO11	F-box protein 11	0	10	0.326437
NEUROG1	neurogenin 1	0	5	0.326437
RNF13	ring finger protein 13	0	5	0.326437
IGF1	insulin-like growth factor 1 (somatomedin C)	13	22	0.326266
RCOR1	REST corepressor 1	1	17	0.326217
CCDC109A		0	12	0.326125
LIN28		0	19	0.326042
EMX2	empty spiracles homeobox 2	0	7	0.325902
ERLIN1	ER lipid raft associated 1	0	14	0.325902
UCP3	uncoupling protein 3 (mitochondrial, proton carrier)	0	7	0.325902
ATP6V1B2	ATPase, H+ transporting, lysosomal 56/58kDa, V1 subunit B2	6	9	0.325605
L3MBTL3	l(3)mbt-like 3 (Drosophila)	0	11	0.325416
SGCD	sarcoglycan, delta (35kDa dystrophin-associated glycoprotein)	4	23	0.324975
ANXA4	annexin A4	0	6	0.324572
DOCK10	dedicator of cytokinesis 10	0	6	0.324572
FOXO4	forkhead box O4	0	8	0.324572
HMGN3	high mobility group nucleosomal binding domain 3	0	6	0.324572
NCKIPSD	NCK interacting protein with SH3 domain	0	8	0.324572
RAB30	RAB30, member RAS oncogene family	0	6	0.324572
AP3B1	adaptor-related protein complex 3, beta 1 subunit	1	4	0.324571
HRSP12	heat-responsive protein 12	0	2	0.324571
KDELC1	KDEL (Lys-Asp-Glu-Leu) containing 1	0	2	0.324571
PDCD10	programmed cell death 10	0	4	0.324571
RFX7	regulatory factor X, 7	0	20	0.324571
SERPINI1	serpin peptidase inhibitor, clade I (neuroserpin), member 1	0	2	0.324571
MXD1	MAX dimerization protein 1	0	19	0.324084
LCOR	ligand dependent nuclear receptor corepressor	0	15	0.323954
BCL11B	B-cell CLL/lymphoma 11B (zinc finger protein)	0	22	0.323731
MTDH	metadherin	0	11	0.323731
MAP4K5	mitogen-activated protein kinase kinase kinase kinase 5	0	9	0.323545
SLC4A4	solute carrier family 4 (sodium bicarbonate cotransporter), member 4	2	18	0.323545
STX17	syntaxin 17	1	9	0.323545
MBNL1	muscleblind-like splicing regulator 1	0	21	0.323252
PSD3	pleckstrin and Sec7 domain containing 3	1	26	0.323151
PCNP	PEST proteolytic signal containing nuclear protein	0	12	0.323033
EPHA4	EPH receptor A4	1	17	0.322943
ZIC1	Zic family member 1	0	15	0.322727
IHH	indian hedgehog	1	5	0.322726
DCUN1D1	DCN1, defective in cullin neddylation 1, domain containing 1	0	13	0.322446
FIGN	fidgetin	0	21	0.322378
ERRFI1	ERBB receptor feedback inhibitor 1	0	8	0.322269
FLOT2	flotillin 2	1	8	0.322269
ZNF608	zinc finger protein 608	0	8	0.322269
TFAP2A	transcription factor AP-2 alpha (activating enhancer binding protein 2 alpha)	0	11	0.322062
ASXL1	additional sex combs like 1 (Drosophila)	0	14	0.321944
SULF1	sulfatase 1	0	14	0.321944
BTBD3	BTB (POZ) domain containing 3	0	17	0.321867
MIER1	mesoderm induction early response 1, transcriptional regulator	0	15	0.32151
C11ORF57	chromosome 11 open reading frame 57	0	12	0.321509
C15ORF41	chromosome 15 open reading frame 41	0	12	0.321509
EGR1	early growth response 1	1	9	0.321509
IKZF2	IKAROS family zinc finger 2 (Helios)	0	24	0.321509
MAFB	v-maf avian musculoaponeurotic fibrosarcoma oncogene homolog B	0	9	0.321509
MTSS1	metastasis suppressor 1	0	12	0.321509
RIPK2	receptor-interacting serine-threonine kinase 2	3	3	0.321509
UBL3	ubiquitin-like 3	0	12	0.321509
CACNA1C	calcium channel, voltage-dependent, L type, alpha 1C subunit	11	10	0.320904
HMGCS1	3-hydroxy-3-methylglutaryl-CoA synthase 1 (soluble)	5	10	0.320904
CNOT8	CCR4-NOT transcription complex, subunit 8	1	7	0.320645
DNAJC13	DnaJ (Hsp40) homolog, subfamily C, member 13	0	7	0.320645
GIT1	G protein-coupled receptor kinase interacting ArfGAP 1	3	7	0.320645
HNRNPK	heterogeneous nuclear ribonucleoprotein K	1	7	0.320645
KIAA1324L	KIAA1324-like	0	7	0.320645
LPPR4	lipid phosphate phosphatase-related protein type 4	0	14	0.320645
RAN	RAN, member RAS oncogene family	1	7	0.320645
SERBP1	SERPINE1 mRNA binding protein 1	0	18	0.320501
ARID5B	AT rich interactive domain 5B (MRF1-like)	0	19	0.320237
BMP2K	BMP2 inducible kinase	0	4	0.32
HS3ST1	heparan sulfate (glucosamine) 3-O-sulfotransferase 1	1	4	0.32
LTB	lymphotoxin beta (TNF superfamily, member 3)	1	4	0.32
PROCR	protein C receptor, endothelial	0	4	0.32
SMARCD2	SWI/SNF related, matrix associated, actin dependent regulator of chromatin, subfamily d, member 2	0	8	0.32
WIBG	within bgcn homolog (Drosophila)	1	4	0.32
ERC2	ELKS/RAB6-interacting/CAST family member 2	0	17	0.319735
AFF4	AF4/FMR2 family, member 4	0	23	0.319413
NR4A2	nuclear receptor subfamily 4, group A, member 2	0	14	0.319358
SLC12A2	solute carrier family 12 (sodium/potassium/chloride transporter), member 2	3	14	0.319358
ELMO2	engulfment and cell motility 2	0	10	0.319101
PDS5B	PDS5, regulator of cohesion maintenance, homolog B (S. cerevisiae)	0	15	0.319101
PPM1B	protein phosphatase, Mg2+/Mn2+ dependent, 1B	1	15	0.319101
CCDC88A	coiled-coil domain containing 88A	0	16	0.318878
CIC	capicua transcriptional repressor	0	6	0.318505
CTNNBIP1	catenin, beta interacting protein 1	1	12	0.318505
NRN1	neuritin 1	0	6	0.318505
SOX2	SRY (sex determining region Y)-box 2	0	6	0.318505
ANK3	ankyrin 3, node of Ranvier (ankyrin G)	0	13	0.318275
PTGES3	prostaglandin E synthase 3 (cytosolic)	0	7	0.318081
FERMT2	fermitin family member 2	0	8	0.317763
SLC4A7	solute carrier family 4, sodium bicarbonate cotransporter, member 7	0	16	0.317762
LUZP1	leucine zipper protein 1	0	18	0.317516
DCBLD2	discoidin, CUB and LCCL domain containing 2	0	19	0.317412
MED12L	mediator complex subunit 12-like	0	10	0.317318
ADNP	activity-dependent neuroprotector homeobox	0	11	0.317157
C10ORF140		0	11	0.317157
CSMD3	CUB and Sushi multiple domains 3	0	11	0.317157
HECW2	HECT, C2 and WW domain containing E3 ubiquitin protein ligase 2	0	12	0.317023
MAGI2	membrane associated guanylate kinase, WW and PDZ domain containing 2	1	12	0.317023
TAF9B	TAF9B RNA polymerase II, TATA box binding protein (TBP)-associated factor, 31kDa	1	12	0.317023
DCUN1D3	DCN1, defective in cullin neddylation 1, domain containing 3	0	13	0.31691
WDR37	WD repeat domain 37	0	18	0.316532
EN1	engrailed homeobox 1	0	4	0.315557
GLRB	glycine receptor, beta	1	4	0.315557
GRK5	G protein-coupled receptor kinase 5	2	4	0.315557
BZW1	basic leucine zipper and W2 domains 1	0	10	0.315556
C10ORF26		0	11	0.315556
C11ORF24	chromosome 11 open reading frame 24	0	2	0.315556
CCNA2	cyclin A2	2	2	0.315556
CDKN3	cyclin-dependent kinase inhibitor 3	0	1	0.315556
COX5A	cytochrome c oxidase subunit Va	6	1	0.315556
DBI	diazepam binding inhibitor (GABA receptor modulator, acyl-CoA binding protein)	1	1	0.315556
DTX2	deltex homolog 2 (Drosophila)	1	3	0.315556
FAM65A	family with sequence similarity 65, member A	0	2	0.315556
FGF14	fibroblast growth factor 14	4	1	0.315556
GABARAP	GABA(A) receptor-associated protein	1	3	0.315556
GLUD2	glutamate dehydrogenase 2	6	3	0.315556
HIGD1A	HIG1 hypoxia inducible domain family, member 1A	0	3	0.315556
HOXA3	homeobox A3	0	10	0.315556
HSPA5	heat shock 70kDa protein 5 (glucose-regulated protein, 78kDa)	4	2	0.315556
KCNN4	potassium intermediate/small conductance calcium-activated channel, subfamily N, member 4	2	3	0.315556
KIAA1429	KIAA1429	0	2	0.315556
LEMD3	LEM domain containing 3	0	11	0.315556
LRIG1	leucine-rich repeats and immunoglobulin-like domains 1	0	9	0.315556
NAE1	NEDD8 activating enzyme E1 subunit 1	1	1	0.315556
NDUFA2	NADH dehydrogenase (ubiquinone) 1 alpha subcomplex, 2, 8kDa	5	1	0.315556
PHEX	phosphate regulating endopeptidase homolog, X-linked	0	3	0.315556
PLCB1	phospholipase C, beta 1 (phosphoinositide-specific)	19	18	0.315556
PPP2R2B	protein phosphatase 2, regulatory subunit B, beta	3	3	0.315556
PRM1	protamine 1	0	1	0.315556
SORL1	sortilin-related receptor, L(DLR class) A repeats containing	0	2	0.315556
TMEM93		0	1	0.315556
ZSWIM5	zinc finger, SWIM-type containing 5	0	11	0.315556
ADRA2A	adrenoceptor alpha 2A	1	8	0.315555
CLK3	CDC-like kinase 3	0	6	0.315555
CNN1	calponin 1, basic, smooth muscle	0	6	0.315555
SIM2	single-minded family bHLH transcription factor 2	0	8	0.315555
TBC1D12	TBC1 domain family, member 12	0	8	0.315555
UNC13C	unc-13 homolog C (C. elegans)	0	8	0.315555
WDR40A		0	6	0.315555
PDIA6	protein disulfide isomerase family A, member 6	1	5	0.315554
PI4KB	phosphatidylinositol 4-kinase, catalytic, beta	3	5	0.315554
SEC24D	SEC24 family member D	1	5	0.315554
FNBP1L	formin binding protein 1-like	0	16	0.314464
ZNF609	zinc finger protein 609	0	16	0.314464
PRKACB	protein kinase, cAMP-dependent, catalytic, beta	23	15	0.314391
TSC22D2	TSC22 domain family, member 2	0	12	0.314101
COL5A2	collagen, type V, alpha 2	4	10	0.313812
GATAD2B	GATA zinc finger domain containing 2B	0	20	0.313812
AMMECR1	Alport syndrome, mental retardation, midface hypoplasia and elliptocytosis chromosomal region gene 1	0	19	0.313721
BRMS1L	breast cancer metastasis-suppressor 1-like	0	9	0.31362
FLT1	fms-related tyrosine kinase 1	3	9	0.31362
SEC23A	Sec23 homolog A (S. cerevisiae)	1	9	0.31362
TLK1	tousled-like kinase 1	0	9	0.31362
BCOR	BCL6 corepressor	0	8	0.31338
ING3	inhibitor of growth family, member 3	0	8	0.31338
SCN8A	sodium channel, voltage gated, type VIII, alpha subunit	0	8	0.31338
SLC2A1	solute carrier family 2 (facilitated glucose transporter), member 1	3	8	0.31338
SH2B3	SH2B adaptor protein 3	1	16	0.313379
GNAO1	guanine nucleotide binding protein (G protein), alpha activating activity polypeptide O	4	7	0.313071
USP38	ubiquitin specific peptidase 38	0	7	0.313071
TUBGCP3	tubulin, gamma complex associated protein 3	0	6	0.312661
UBE4A	ubiquitination factor E4A	1	12	0.312661
MPPED2	metallophosphoesterase domain containing 2	0	11	0.3124
ATG9A	autophagy related 9A	0	10	0.312088
FURIN	furin (paired basic amino acid cleaving enzyme)	0	10	0.312088
GABBR2	gamma-aminobutyric acid (GABA) B receptor, 2	1	15	0.312088
HNT		0	10	0.312088
INHBB	inhibin, beta B	2	10	0.312088
RB1	retinoblastoma 1	10	10	0.312088
RRAS2	related RAS viral (r-ras) oncogene homolog 2	3	5	0.312088
TMEM47	transmembrane protein 47	0	15	0.312088
TNC	tenascin C	2	5	0.312088
UBP1	upstream binding protein 1 (LBP-1a)	0	10	0.312088
PRKG1	protein kinase, cGMP-dependent, type I	5	14	0.311843
DIP2C	DIP2 disco-interacting protein 2 homolog C (Drosophila)	0	9	0.311707
GAD1	glutamate decarboxylase 1 (brain, 67kDa)	6	9	0.311707
STIM2	stromal interaction molecule 2	0	13	0.311561
SOX12	SRY (sex determining region Y)-box 12	0	17	0.311484
ATG16L1	autophagy related 16-like 1 (S. cerevisiae)	0	8	0.311233
SLC6A1	solute carrier family 6 (neurotransmitter transporter), member 1	0	12	0.311233
ASAP1	ArfGAP with SH3 domain, ankyrin repeat and PH domain 1	2	15	0.310949
CCDC85A	coiled-coil domain containing 85A	0	11	0.310845
NRK	Nik related kinase	0	14	0.310625
TAOK3	TAO kinase 3	1	7	0.310624
UHMK1	U2AF homology motif (UHM) kinase 1	0	10	0.310383
RBM24	RNA binding motif protein 24	0	13	0.310252
CHRM2	cholinergic receptor, muscarinic 2	3	9	0.309819
SLITRK3	SLIT and NTRK-like family, member 3	0	9	0.309819
BMX	BMX non-receptor tyrosine kinase	0	3	0.309818
EFCAB4A	EF-hand calcium binding domain 4A	0	3	0.309818
JARID1B		0	3	0.309818
MAP2K5	mitogen-activated protein kinase kinase 5	3	3	0.309818
MYOD1	myogenic differentiation 1	0	3	0.309818
SPAG7	sperm associated antigen 7	0	3	0.309818
TTC1	tetratricopeptide repeat domain 1	0	3	0.309818
TTR	transthyretin	0	3	0.309818
MARCKSL1	MARCKS-like 1	2	6	0.309817
TASP1	taspase, threonine aspartase, 1	0	6	0.309817
UBE2W	ubiquitin-conjugating enzyme E2W (putative)	1	17	0.309487
PAPOLG	poly(A) polymerase gamma	1	11	0.309307
CSMD1	CUB and Sushi multiple domains 1	0	8	0.309116
SKP1	S-phase kinase-associated protein 1	7	8	0.309116
ATP8A1	ATPase, aminophospholipid transporter (APLT), class I, type 8A, member 1	0	13	0.308954
JOSD1	Josephin domain containing 1	0	13	0.308954
TNPO1	transportin 1	0	18	0.308882
ERBB4	v-erb-b2 avian erythroblastic leukemia viral oncogene homolog 4	3	23	0.308841
LRRC17	leucine rich repeat containing 17	0	5	0.308697
SPRY2	sprouty homolog 2 (Drosophila)	1	5	0.308697
TACC2	transforming, acidic coiled-coil containing protein 2	0	5	0.308697
USP4	ubiquitin specific peptidase 4 (proto-oncogene)	0	5	0.308697
INO80	INO80 complex subunit	0	10	0.308696
SPRY4	sprouty homolog 4 (Drosophila)	1	17	0.308498
CSNK1G1	casein kinase 1, gamma 1	1	24	0.308416
YOD1	YOD1 deubiquitinase	1	19	0.308343
IGF2R	insulin-like growth factor 2 receptor	1	7	0.308217
PPP1CC	protein phosphatase 1, catalytic subunit, gamma isozyme	6	7	0.308217
AKT3	v-akt murine thymoma viral oncogene homolog 3	34	18	0.307952
ARHGAP21	Rho GTPase activating protein 21	0	9	0.307952
KCNJ2	potassium inwardly-rectifying channel, subfamily J, member 2	1	19	0.307465
AFF2	AF4/FMR2 family, member 2	0	27	0.307335
HTRA2	HtrA serine peptidase 2	1	4	0.307028
SEC23IP	SEC23 interacting protein	0	4	0.307028
SECISBP2	SECIS binding protein 2	0	4	0.307028
TPP2	tripeptidyl peptidase II	0	4	0.307028
FSD1	fibronectin type III and SPRY domain containing 1	0	2	0.307027
KRAS	Kirsten rat sarcoma viral oncogene homolog	35	18	0.307027
NR1H2	nuclear receptor subfamily 1, group H, member 2	0	2	0.307027
SGCE	sarcoglycan, epsilon	0	2	0.307027
TMEM2	transmembrane protein 2	0	10	0.307027
TOP2B	topoisomerase (DNA) II beta 180kDa	0	2	0.307027
TSC22D1	TSC22 domain family, member 1	0	6	0.307027
USP21	ubiquitin specific peptidase 21	0	2	0.307027
ETV1	ets variant 1	0	15	0.306475
AGFG1	ArfGAP with FG repeats 1	0	13	0.30639
LPHN2	latrophilin 2	0	11	0.306274
HBEGF	heparin-binding EGF-like growth factor	3	9	0.306108
EPB41L4B	erythrocyte membrane protein band 4.1 like 4B	0	18	0.306107
HNF1B	HNF1 homeobox B	1	7	0.305845
PRDM4	PR domain containing 4	1	7	0.305845
SRPR	signal recognition particle receptor (docking protein)	1	7	0.305845
RUNX1	runt-related transcription factor 1	3	19	0.305722
FAM179B	family with sequence similarity 179, member B	0	12	0.30565
C19ORF6		0	5	0.305376
MFSD6	major facilitator superfamily domain containing 6	0	10	0.305376
NUMA1	nuclear mitotic apparatus protein 1	0	5	0.305376
RUNX2	runt-related transcription factor 2	0	18	0.305194
CMPK1	cytidine monophosphate (UMP-CMP) kinase 1, cytosolic	2	13	0.305124
CREM	cAMP responsive element modulator	0	13	0.305124
PAPOLA	poly(A) polymerase alpha	1	13	0.305124
C9ORF150		0	8	0.304967
MAPK6	mitogen-activated protein kinase 6	1	8	0.304967
NEUROD2	neuronal differentiation 2	0	8	0.304967
ADAMTS5	ADAM metallopeptidase with thrombospondin type 1 motif, 5	0	19	0.304858
DCP2	decapping mRNA 2	1	19	0.304858
PHF21A	PHD finger protein 21A	0	11	0.304781
RNF165	ring finger protein 165	0	20	0.304558
C1GALT1	core 1 synthase, glycoprotein-N-acetylgalactosamine 3-beta-galactosyltransferase, 1	2	6	0.304287
PRKD1	protein kinase D1	0	6	0.304287
CHMP5	charged multivesicular body protein 5	1	3	0.304286
FBN3	fibrillin 3	0	3	0.304286
MYB	v-myb avian myeloblastosis viral oncogene homolog	0	15	0.304286
FAM130A1		0	9	0.304285
FSTL5	follistatin-like 5	0	9	0.304285
CANX	calnexin	3	14	0.303512
CDC14A	cell division cycle 14A	1	14	0.303512
CEP120	centrosomal protein 120kDa	0	7	0.303512
IRF2BP2	interferon regulatory factor 2 binding protein 2	0	14	0.303512
GPR137C	G protein-coupled receptor 137C	0	11	0.303301
CDX2	caudal type homeobox 2	0	4	0.302933
KLC4	kinesin light chain 4	0	4	0.302933
KRT1	keratin 1	0	4	0.302933
NAP1L2	nucleosome assembly protein 1-like 2	0	4	0.302933
PTHLH	parathyroid hormone-like hormone	0	8	0.302933
RP5-1022P6.2		0	8	0.302933
SUV420H2	suppressor of variegation 4-20 homolog 2 (Drosophila)	1	4	0.302933
YWHAZ	tyrosine 3-monooxygenase/tryptophan 5-monooxygenase activation protein, zeta polypeptide	4	13	0.302623
PCDH19	protocadherin 19	0	20	0.302128
PPFIA3	protein tyrosine phosphatase, receptor type, f polypeptide (PTPRF), interacting protein (liprin), alpha 3	0	5	0.302128
RAB4B	RAB4B, member RAS oncogene family	0	5	0.302128
BCL2L2	BCL2-like 2	0	18	0.301593
CCND3	cyclin D3	5	6	0.301593
HDAC4	histone deacetylase 4	0	18	0.301593
NAP5		0	6	0.301593
SPRY1	sprouty homolog 1, antagonist of FGF signaling (Drosophila)	1	6	0.301593
PIGA	phosphatidylinositol glycan anchor biosynthesis, class A	2	13	0.301388
HDGF	hepatoma-derived growth factor	0	8	0.300927
SORT1	sortilin 1	2	18	0.300706
EPHA8	EPH receptor A8	1	9	0.300705
KCMF1	potassium channel modulatory factor 1	0	9	0.300705
MYT1	myelin transcription factor 1	0	9	0.300705
VCPIP1	valosin containing protein (p97)/p47 complex interacting protein 1	0	19	0.300613
SERTAD2	SERTA domain containing 2	0	20	0.300529
HMBOX1	homeobox containing 1	0	11	0.300384
PCLO	piccolo presynaptic cytomatrix protein	0	11	0.300384
RASL10B	RAS-like, family 10, member B	0	11	0.300384
SH3PXD2A	SH3 and PX domains 2A	0	22	0.300384
FCHO2	FCH domain only 2	0	12	0.300265
MARCH5	membrane-associated ring finger (C3HC4) 5	0	15	0.3
BBX	bobby sox homolog (Drosophila)	0	2	0.298948
C5ORF46	chromosome 5 open reading frame 46	0	2	0.298948
CPSF4	cleavage and polyadenylation specific factor 4, 30kDa	0	4	0.298948
DYNLL1	dynein, light chain, LC8-type 1	1	2	0.298948
LMO1	LIM domain only 1 (rhombotin 1)	0	2	0.298948
MAGED1	melanoma antigen family D, 1	1	2	0.298948
MARK3	MAP/microtubule affinity-regulating kinase 3	0	4	0.298948
MRPS23	mitochondrial ribosomal protein S23	0	2	0.298948
NAGK	N-acetylglucosamine kinase	1	2	0.298948
PAN2	PAN2 poly(A) specific ribonuclease subunit homolog (S. cerevisiae)	0	6	0.298948
PARP8	poly (ADP-ribose) polymerase family, member 8	0	2	0.298948
PPIC	peptidylprolyl isomerase C (cyclophilin C)	0	2	0.298948
RBM4B	RNA binding motif protein 4B	0	2	0.298948
TTLL7	tubulin tyrosine ligase-like family, member 7	0	4	0.298948
UQCRFS1	ubiquinol-cytochrome c reductase, Rieske iron-sulfur polypeptide 1	6	2	0.298948
ARMET		0	1	0.298947
BAG3	BCL2-associated athanogene 3	0	3	0.298947
C14ORF147		0	10	0.298947
CFH	complement factor H	2	1	0.298947
COX7B	cytochrome c oxidase subunit VIIb	6	1	0.298947
DDIT3	DNA-damage-inducible transcript 3	2	1	0.298947
DMPK	dystrophia myotonica-protein kinase	0	3	0.298947
DSG4	desmoglein 4	0	3	0.298947
DYNLRB2	dynein, light chain, roadblock-type 2	0	1	0.298947
EIF2B3	eukaryotic translation initiation factor 2B, subunit 3 gamma, 58kDa	1	1	0.298947
FGF21	fibroblast growth factor 21	4	1	0.298947
FSCN3	fascin homolog 3, actin-bundling protein, testicular (Strongylocentrotus purpuratus)	0	1	0.298947
IL1RAPL2	interleukin 1 receptor accessory protein-like 2	0	1	0.298947
JAKMIP1	janus kinase and microtubule interacting protein 1	0	3	0.298947
KIAA1409		0	3	0.298947
KLF5	Kruppel-like factor 5 (intestinal)	0	7	0.298947
PC-3		0	1	0.298947
PCOLCE	procollagen C-endopeptidase enhancer	0	1	0.298947
RUVBL2	RuvB-like AAA ATPase 2	0	1	0.298947
SRRM1	serine/arginine repetitive matrix 1	1	5	0.298947
STK39	serine threonine kinase 39	0	9	0.298947
UHRF1BP1L	UHRF1 binding protein 1-like	0	3	0.298947
ZBTB10	zinc finger and BTB domain containing 10	0	8	0.298947
PGM2L1	phosphoglucomutase 2-like 1	1	22	0.298234
BTBD7	BTB (POZ) domain containing 7	0	18	0.298076
PAPD5	PAP associated domain containing 5	0	18	0.298076
SYNJ1	synaptojanin 1	3	15	0.297902
EDARADD	EDAR-associated death domain	0	10	0.297382
IGF2BP2	insulin-like growth factor 2 mRNA binding protein 2	0	10	0.297382
ACSL1	acyl-CoA synthetase long-chain family member 1	5	9	0.297209
FOXA1	forkhead box A1	0	8	0.296993
HMGCLL1	3-hydroxymethyl-3-methylglutaryl-CoA lyase-like 1	0	8	0.296993
JMJD2A		0	8	0.296993
PAX2	paired box 2	0	8	0.296993
CLCN3	chloride channel, voltage-sensitive 3	0	7	0.296717
THSD7A	thrombospondin, type I, domain containing 7A	0	7	0.296717
TMEM9B	TMEM9 domain family, member B	0	7	0.296717
HEXIM1	hexamethylene bis-acetamide inducible 1	0	13	0.296546
ADSS	adenylosuccinate synthase	3	6	0.296348
ANK1	ankyrin 1, erythrocytic	0	12	0.296348
ATP11C	ATPase, class VI, type 11C	0	12	0.296348
CDC37L1	cell division cycle 37-like 1	0	6	0.296348
SAPS3		0	11	0.296114
FOSL1	FOS-like antigen 1	1	5	0.295834
LRIG2	leucine-rich repeats and immunoglobulin-like domains 2	0	5	0.295834
RET	ret proto-oncogene	3	10	0.295833
BDNF	brain-derived neurotrophic factor	3	14	0.295614
HOOK3	hook microtubule-tethering protein 3	0	9	0.295491
SNIP1	Smad nuclear interacting protein 1	0	9	0.295491
TACC1	transforming, acidic coiled-coil containing protein 1	0	18	0.295491
SERP1	stress-associated endoplasmic reticulum protein 1	0	13	0.29536
SOX6	SRY (sex determining region Y)-box 6	0	13	0.29536
MAF	v-maf avian musculoaponeurotic fibrosarcoma oncogene homolog	0	16	0.295065
TCF20	transcription factor 20 (AR1)	0	8	0.295065
C1QL3	complement component 1, q subcomponent-like 3	0	4	0.295064
CHN1	chimerin 1	0	4	0.295064
PON2	paraoxonase 2	1	4	0.295064
NRP2	neuropilin 2	0	19	0.294863
FBN1	fibrillin 1	0	15	0.29481
RAPGEFL1	Rap guanine nucleotide exchange factor (GEF)-like 1	0	11	0.294717
C18ORF25	chromosome 18 open reading frame 25	0	18	0.29464
ARHGEF11	Rho guanine nucleotide exchange factor (GEF) 11	1	7	0.294518
BTBD11	BTB (POZ) domain containing 11	0	10	0.2943
CDYL	chromodomain protein, Y-like	0	10	0.2943
NHLH2	nescient helix loop helix 2	0	10	0.2943
C8ORF4	chromosome 8 open reading frame 4	0	9	0.293794
HOXB5	homeobox B5	0	6	0.293794
KIAA1468	KIAA1468	0	9	0.293794
MBD5	methyl-CpG binding domain protein 5	0	6	0.293794
SMOC2	SPARC related modular calcium binding 2	0	6	0.293794
ZNF711	zinc finger protein 711	0	9	0.293794
CLUL1	clusterin-like 1 (retinal)	0	3	0.293793
CXORF15		0	3	0.293793
GRM8	glutamate receptor, metabotropic 8	1	3	0.293793
PACRG	PARK2 co-regulated	0	3	0.293793
BIVM	basic, immunoglobulin-like variable motif containing	0	8	0.293161
INPP5A	inositol polyphosphate-5-phosphatase, 40kDa	3	8	0.293161
KIAA1549	KIAA1549	0	8	0.293161
USP47	ubiquitin specific peptidase 47	0	16	0.293161
ZDHHC7	zinc finger, DHHC-type containing 7	0	8	0.293161
IGF2BP1	insulin-like growth factor 2 mRNA binding protein 1	0	21	0.293071
MAP1B	microtubule-associated protein 1B	0	13	0.293016
SLC9A6	solute carrier family 9, subfamily A (NHE6, cation proton antiporter 6), member 6	1	13	0.293016
CTSK	cathepsin K	2	5	0.292783
NFATC3	nuclear factor of activated T-cells, cytoplasmic, calcineurin-dependent 3	6	5	0.292783
SAPS1		0	5	0.292783
STX12	syntaxin 12	1	12	0.292532
FAM43A	family with sequence similarity 43, member A	0	7	0.292353
LYSMD3	LysM, putative peptidoglycan-binding, domain containing 3	0	13	0.291858
ZBTB5	zinc finger and BTB domain containing 5	0	13	0.291858
NCAM1	neural cell adhesion molecule 1	2	17	0.291722
CFDP1	craniofacial development protein 1	0	2	0.291282
CHST2	carbohydrate (N-acetylglucosamine-6-O) sulfotransferase 2	1	4	0.291282
DNAJB11	DnaJ (Hsp40) homolog, subfamily B, member 11	1	2	0.291282
DOLPP1	dolichyldiphosphatase 1	1	10	0.291282
LMBRD1	LMBR1 domain containing 1	0	2	0.291282
LOR	loricrin	0	2	0.291282
NEDD1	neural precursor cell expressed, developmentally down-regulated 1	0	4	0.291282
PBXIP1	pre-B-cell leukemia homeobox interacting protein 1	0	4	0.291282
PIGF	phosphatidylinositol glycan anchor biosynthesis, class F	2	2	0.291282
PPP6C	protein phosphatase 6, catalytic subunit	0	6	0.291282
RNF126	ring finger protein 126	0	2	0.291282
RNF138	ring finger protein 138, E3 ubiquitin protein ligase	0	12	0.291282
SCYL3	SCY1-like 3 (S. cerevisiae)	0	4	0.291282
SPOCK3	sparc/osteonectin, cwcv and kazal-like domains proteoglycan (testican) 3	0	8	0.291282
WDR45L		0	6	0.291282
ZFP2	ZFP2 zinc finger protein	0	2	0.291282
MED13	mediator complex subunit 13	0	15	0.290785
FAM91A1	family with sequence similarity 91, member A1	0	13	0.290709
ZADH2	zinc binding alcohol dehydrogenase domain containing 2	0	13	0.290709
TNKS2	tankyrase, TRF1-interacting ankyrin-related ADP-ribose polymerase 2	0	11	0.290605
DNAJB1	DnaJ (Hsp40) homolog, subfamily B, member 1	1	7	0.290219
TPM1	tropomyosin 1 (alpha)	3	7	0.290219
DTNA	dystrobrevin, alpha	0	19	0.290107
BECN1	beclin 1, autophagy related	1	5	0.289796
MLLT6	myeloid/lymphoid or mixed-lineage leukemia (trithorax homolog, Drosophila); translocated to, 6	0	10	0.289796
TGIF1	TGFB-induced factor homeobox 1	0	5	0.289796
BPTF	bromodomain PHD finger transcription factor	0	15	0.288814
C8ORF58	chromosome 8 open reading frame 58	0	6	0.288814
HAND1	heart and neural crest derivatives expressed 1	0	3	0.288814
INPPL1	inositol polyphosphate phosphatase-like 1	3	3	0.288814
MYEF2	myelin expression factor 2	0	12	0.288814
NAT14	N-acetyltransferase 14 (GCN5-related, putative)	0	3	0.288814
PSRC1	proline/serine-rich coiled-coil 1	0	3	0.288814
ZDHHC5	zinc finger, DHHC-type containing 5	0	6	0.288814
C14ORF28	chromosome 14 open reading frame 28	0	9	0.288813
ARHGAP6	Rho GTPase activating protein 6	0	10	0.288325
WTAP	Wilms tumor 1 associated protein	0	10	0.288325
KDR	kinase insert domain receptor (a type III receptor tyrosine kinase)	4	7	0.288116
BCL9L	B-cell CLL/lymphoma 9-like	0	11	0.287926
KIAA1267		0	8	0.287595
TRHDE	thyrotropin-releasing hormone degrading enzyme	0	12	0.287595
UBE2B	ubiquitin-conjugating enzyme E2B	1	12	0.287595
C17ORF59	chromosome 17 open reading frame 59	0	4	0.287594
CDK5R1	cyclin-dependent kinase 5, regulatory subunit 1 (p35)	1	13	0.287315
MAP7	microtubule-associated protein 7	0	9	0.287191
NETO2	neuropilin (NRP) and tolloid (TLL)-like 2	0	9	0.287191
PRKCB	protein kinase C, beta	31	9	0.287191
RGMA	RGM domain family, member A	0	9	0.287191
ROD1		0	18	0.287191
SLAIN1	SLAIN motif family, member 1	0	9	0.287191
PVRL1	poliovirus receptor-related 1 (herpesvirus entry mediator C)	2	14	0.287076
NAV2	neuron navigator 2	0	15	0.286869
XKR6	XK, Kell blood group complex subunit-related family, member 6	0	10	0.286869
AJAP1	adherens junctions associated protein 1	0	5	0.286868
BCL2L14	BCL2-like 14 (apoptosis facilitator)	0	5	0.286868
FLT3	fms-related tyrosine kinase 3	4	5	0.286868
ZMAT2	zinc finger, matrin-type 2	1	5	0.286868
NPTX1	neuronal pentraxin I	0	17	0.286528
WDR26	WD repeat domain 26	0	17	0.286528
REV3L	REV3-like, polymerase (DNA directed), zeta, catalytic subunit	1	7	0.286043
SCOC	short coiled-coil protein	0	7	0.286043
TARDBP	TAR DNA binding protein	0	14	0.286043
CAPZA2	capping protein (actin filament) muscle Z-line, alpha 2	0	8	0.285786
FZD6	frizzled family receptor 6	4	8	0.285786
GORASP2	golgi reassembly stacking protein 2, 55kDa	0	8	0.285786
PPP2R1B	protein phosphatase 2, regulatory subunit A, beta	7	8	0.285786
GNAI1	guanine nucleotide binding protein (G protein), alpha inhibiting activity polypeptide 1	11	9	0.285586
PEX5	peroxisomal biogenesis factor 5	1	9	0.285586
INTS2	integrator complex subunit 2	0	10	0.285427
EPN2	epsin 2	1	12	0.285188
NAP1L1	nucleosome assembly protein 1-like 1	0	12	0.285188
IGSF3	immunoglobulin superfamily, member 3	0	14	0.285018
PTGFRN	prostaglandin F2 receptor inhibitor	0	14	0.285018
N4BP1	NEDD4 binding protein 1	0	15	0.28495
TFAP2B	transcription factor AP-2 beta (activating enhancer binding protein 2 beta)	0	15	0.28495
ICK	intestinal cell (MAK-like) kinase	0	16	0.28489
BRWD1	bromodomain and WD repeat domain containing 1	0	22	0.284647
ANKRD7	ankyrin repeat domain 7	0	1	0.284
ANKRD9	ankyrin repeat domain 9	0	1	0.284
APOD	apolipoprotein D	0	1	0.284
C11ORF75		0	3	0.284
CCL7	chemokine (C-C motif) ligand 7	3	3	0.284
CLPX	caseinolytic mitochondrial matrix peptidase chaperone subunit	0	2	0.284
CNBP	CCHC-type zinc finger, nucleic acid binding protein	0	5	0.284
CRY1	cryptochrome 1 (photolyase-like)	1	3	0.284
DOCK7	dedicator of cytokinesis 7	0	3	0.284
HEY1	hes-related family bHLH transcription factor with YRPW motif 1	0	7	0.284
KRTAP11-1	keratin associated protein 11-1	0	3	0.284
LRP4	low density lipoprotein receptor-related protein 4	0	12	0.284
MAGED4B	melanoma antigen family D, 4B	0	1	0.284
MEMO1	Methylation modifier for class I HLA	0	3	0.284
NR5A2	nuclear receptor subfamily 5, group A, member 2	1	14	0.284
OSGEPL1	O-sialoglycoprotein endopeptidase-like 1	0	2	0.284
OXSR1	oxidative stress responsive 1	0	12	0.284
PRPF19	pre-mRNA processing factor 19	2	2	0.284
PTP4A3	protein tyrosine phosphatase type IVA, member 3	0	2	0.284
PUNC		0	3	0.284
SAP30	Sin3A-associated protein, 30kDa	0	1	0.284
SERTAD4	SERTA domain containing 4	0	4	0.284
SFI1	Sfi1 homolog, spindle assembly associated (yeast)	0	1	0.284
SHANK3	SH3 and multiple ankyrin repeat domains 3	0	10	0.284
SNAPIN	SNAP-associated protein	0	4	0.284
SSR1	signal sequence receptor, alpha	1	11	0.284
SUCLG1	succinate-CoA ligase, alpha subunit	3	1	0.284
TBC1D8	TBC1 domain family, member 8 (with GRAM domain)	0	3	0.284
TMEM85		0	3	0.284
WNT3A	wingless-type MMTV integration site family, member 3A	5	5	0.284
ZNF654	zinc finger protein 654	0	13	0.284
PAPPA	pregnancy-associated plasma protein A, pappalysin 1	0	20	0.283292
RHOBTB1	Rho-related BTB domain containing 1	1	13	0.282912
VAMP1	vesicle-associated membrane protein 1 (synaptobrevin 1)	1	12	0.282821
DPP10	dipeptidyl-peptidase 10 (non-functional)	0	11	0.282715
SPEN	spen family transcriptional repressor	0	10	0.282587
MBOAT2	membrane bound O-acyltransferase domain containing 2	3	9	0.28243
AQP4	aquaporin 4	1	16	0.282236
GATA6	GATA binding protein 6	0	8	0.282235
PPP2R5C	protein phosphatase 2, regulatory subunit B', gamma	2	14	0.281986
SMEK1	SMEK homolog 1, suppressor of mek1 (Dictyostelium)	0	7	0.281985
CUL2	cullin 2	3	6	0.281652
KCTD8	potassium channel tetramerization domain containing 8	0	6	0.281652
GGA1	golgi-associated, gamma adaptin ear containing, ARF binding protein 1	1	5	0.281187
TBC1D10B	TBC1 domain family, member 10B	0	5	0.281187
YWHAQ	tyrosine 3-monooxygenase/tryptophan 5-monooxygenase activation protein, theta polypeptide	4	9	0.280879
ATRX	alpha thalassemia/mental retardation syndrome X-linked	0	13	0.28076
OSTM1	osteopetrosis associated transmembrane protein 1	0	13	0.28076
DOK4	docking protein 4	0	8	0.280494
NOMO3	NODAL modulator 3	0	4	0.280493
NSMAF	neutral sphingomyelinase (N-SMase) activation associated factor	0	4	0.280493
NRP1	neuropilin 1	1	15	0.280263
TXNIP	thioredoxin interacting protein	0	7	0.28
CSDE1	cold shock domain containing E1, RNA-binding	0	9	0.279345
RTN3	reticulon 3	0	9	0.279345
SMAD7	SMAD family member 7	2	9	0.279345
WDR20	WD repeat domain 20	0	9	0.279345
MAP1LC3A	microtubule-associated protein 1 light chain 3 alpha	0	3	0.279344
MYBL2	v-myb avian myeloblastosis viral oncogene homolog-like 2	0	3	0.279344
NPAL2		0	3	0.279344
SMARCA2	SWI/SNF related, matrix associated, actin dependent regulator of chromatin, subfamily a, member 2	0	6	0.279344
SYN1	synapsin I	0	6	0.279344
DPYSL2	dihydropyrimidinase-like 2	1	13	0.278642
UBE2Z	ubiquitin-conjugating enzyme E2Z	1	10	0.278431
WWC1	WW and C2 domain containing 1	0	5	0.278431
TOX	thymocyte selection-associated high mobility group box	0	12	0.278204
NAP1L5	nucleosome assembly protein 1-like 5	0	7	0.278043
PIM1	pim-1 oncogene	2	7	0.278043
LGR4	leucine-rich repeat containing G protein-coupled receptor 4	1	9	0.277826
MOBKL2B		0	13	0.277594
TLE4	transducin-like enhancer of split 4 (E(sp1) homolog, Drosophila)	0	13	0.277594
KCNA3	potassium voltage-gated channel, shaker-related subfamily, member 3	0	6	0.277074
SNAI2	snail family zinc finger 2	1	6	0.277074
TNFRSF21	tumor necrosis factor receptor superfamily, member 21	1	6	0.277074
AFF3	AF4/FMR2 family, member 3	0	14	0.277073
APOBEC2	apolipoprotein B mRNA editing enzyme, catalytic polypeptide-like 2	0	2	0.277073
ARF1	ADP-ribosylation factor 1	1	8	0.277073
ATP1B3	ATPase, Na+/K+ transporting, beta 3 polypeptide	8	4	0.277073
C17ORF71		0	2	0.277073
CCDC117	coiled-coil domain containing 117	0	14	0.277073
CREB3	cAMP responsive element binding protein 3	4	2	0.277073
CREB3L1	cAMP responsive element binding protein 3-like 1	4	4	0.277073
CUL1	cullin 1	7	4	0.277073
DDX19B	DEAD (Asp-Glu-Ala-Asp) box polypeptide 19B	0	2	0.277073
DLX5	distal-less homeobox 5	0	2	0.277073
HOXD8	homeobox D8	0	4	0.277073
IMMT	inner membrane protein, mitochondrial	0	2	0.277073
KCNE2	potassium voltage-gated channel, Isk-related family, member 2	1	2	0.277073
MTM1	myotubularin 1	0	8	0.277073
PIK3C2G	phosphatidylinositol-4-phosphate 3-kinase, catalytic subunit type 2 gamma	3	2	0.277073
SFMBT1	Scm-like with four mbt domains 1	0	4	0.277073
SLC25A14	solute carrier family 25 (mitochondrial carrier, brain), member 14	0	2	0.277073
SON	SON DNA binding protein	0	12	0.277073
TMEM66	transmembrane protein 66	0	4	0.277073
TTK	TTK protein kinase	1	2	0.277073
ZNF804A	zinc finger protein 804A	0	2	0.277073
COL19A1	collagen, type XIX, alpha 1	0	17	0.276676
PEX5L	peroxisomal biogenesis factor 5-like	0	9	0.276325
PIK3R1	phosphoinositide-3-kinase, regulatory subunit 1 (alpha)	39	16	0.276231
MTMR3	myotubularin related protein 3	0	14	0.276111
UNC5D	unc-5 homolog D (C. elegans)	1	14	0.276111
HSPG2	heparan sulfate proteoglycan 2	1	5	0.275729
ITM2B	integral membrane protein 2B	0	5	0.275729
RAF1	v-raf-1 murine leukemia viral oncogene homolog 1	33	5	0.275729
ALS2CR4		0	15	0.275728
FAM104A	family with sequence similarity 104, member A	0	10	0.275728
ROCK1	Rho-associated, coiled-coil containing protein kinase 1	10	10	0.275728
WDTC1	WD and tetratricopeptide repeats 1	0	10	0.275728
ADAM10	ADAM metallopeptidase domain 10	2	8	0.275394
ARFGAP2	ADP-ribosylation factor GTPase activating protein 2	1	8	0.275394
MRPL43	mitochondrial ribosomal protein L43	0	8	0.275394
BMPER	BMP binding endothelial regulator	0	11	0.275243
SFRS12		0	11	0.275243
PHF20	PHD finger protein 20	0	17	0.2751
SHANK2	SH3 and multiple ankyrin repeat domains 2	0	17	0.2751
ACTR2	ARP2 actin-related protein 2 homolog (yeast)	0	9	0.274839
ATL3	atlastin GTPase 3	0	3	0.274839
C12ORF35		0	3	0.274839
FASN	fatty acid synthase	3	3	0.274839
FGF7	fibroblast growth factor 7	4	12	0.274839
GPR124	G protein-coupled receptor 124	0	9	0.274839
GRIA1	glutamate receptor, ionotropic, AMPA 1	4	3	0.274839
NKX2-2	NK2 homeobox 2	1	3	0.274839
TBX4	T-box 4	0	3	0.274839
TRIM8	tripartite motif containing 8	0	6	0.274839
UBE2V2	ubiquitin-conjugating enzyme E2 variant 2	0	6	0.274839
CREBBP	CREB binding protein	12	10	0.274396
AUTS2	autism susceptibility candidate 2	0	7	0.274207
CASKIN1	CASK interacting protein 1	0	7	0.274207
YAF2	YY1 associated factor 2	0	15	0.273955
CDS1	CDP-diacylglycerol synthase (phosphatidate cytidylyltransferase) 1	3	4	0.273736
VCP	valosin containing protein	1	4	0.273736
BMPR2	bone morphogenetic protein receptor, type II (serine/threonine kinase)	2	20	0.273735
FOXO3	forkhead box O3	4	8	0.273735
HOMER1	homer homolog 1 (Drosophila)	0	12	0.273735
KIAA0256		0	8	0.273735
NARG1		0	12	0.273735
PPP1R11	protein phosphatase 1, regulatory (inhibitor) subunit 11	0	8	0.273735
RCC2	regulator of chromosome condensation 2	0	8	0.273735
RIOK3	RIO kinase 3	0	8	0.273735
SOBP	sine oculis binding protein homolog (Drosophila)	0	12	0.273735
PDGFRA	platelet-derived growth factor receptor, alpha polypeptide	11	17	0.273541
KIAA0831		0	13	0.273481
RAP2A	RAP2A, member of RAS oncogene family	0	13	0.273481
PNKD	paroxysmal nonkinesigenic dyskinesia	0	9	0.273369
C5ORF24	chromosome 5 open reading frame 24	0	15	0.273077
DMRT3	doublesex and mab-3 related transcription factor 3	0	5	0.273077
STXBP5L	syntaxin binding protein 5-like	0	5	0.273077
GABRB2	gamma-aminobutyric acid (GABA) A receptor, beta 2	1	16	0.272913
B4GALT1	UDP-Gal:betaGlcNAc beta 1,4- galactosyltransferase, polypeptide 1	5	11	0.272839
FAM133B	family with sequence similarity 133, member B	0	6	0.272641
ZZZ3	zinc finger, ZZ-type containing 3	0	7	0.272328
ANKFY1	ankyrin repeat and FYVE domain containing 1	0	15	0.272205
CLIP1	CAP-GLY domain containing linker protein 1	0	8	0.272096
EDEM3	ER degradation enhancer, mannosidase alpha-like 3	1	16	0.272096
RAC1	ras-related C3 botulinum toxin substrate 1 (rho family, small GTP binding protein Rac1)	26	8	0.272096
ARRDC4	arrestin domain containing 4	0	11	0.271652
THBS1	thrombospondin 1	7	11	0.271652
KCNA1	potassium voltage-gated channel, shaker-related subfamily, member 1 (episodic ataxia with myokymia)	0	20	0.271122
EPHB3	EPH receptor B3	1	5	0.270477
GNPDA2	glucosamine-6-phosphate deaminase 2	2	5	0.270477
KLHDC8B	kelch domain containing 8B	0	7	0.270477
NDRG2	NDRG family member 2	0	5	0.270477
NKRF	NFKB repressing factor	0	5	0.270477
SFRS7		1	7	0.270477
UXS1	UDP-glucuronate decarboxylase 1	3	5	0.270477
ZFR	zinc finger RNA binding protein	0	7	0.270477
ZNF521	zinc finger protein 521	0	5	0.270477
ADRA2C	adrenoceptor alpha 2C	1	1	0.270476
AKAP3	A kinase (PRKA) anchor protein 3	0	1	0.270476
ALX1	ALX homeobox 1	0	1	0.270476
ARL4A	ADP-ribosylation factor-like 4A	0	11	0.270476
ATXN2L	ataxin 2-like	0	6	0.270476
C5ORF32		0	2	0.270476
CACNB2	calcium channel, voltage-dependent, beta 2 subunit	5	11	0.270476
CCNH	cyclin H	2	1	0.270476
CDKN1A	cyclin-dependent kinase inhibitor 1A (p21, Cip1)	10	9	0.270476
COL10A1	collagen, type X, alpha 1	0	4	0.270476
CTCF	CCCTC-binding factor (zinc finger protein)	0	8	0.270476
DDAH1	dimethylarginine dimethylaminohydrolase 1	0	12	0.270476
DKK1	dickkopf WNT signaling pathway inhibitor 1	1	6	0.270476
DNTTIP1	deoxynucleotidyltransferase, terminal, interacting protein 1	0	1	0.270476
EDF1	endothelial differentiation-related factor 1	0	1	0.270476
HSPA9	heat shock 70kDa protein 9 (mortalin)	1	3	0.270476
IVNS1ABP	influenza virus NS1A binding protein	0	9	0.270476
KLF9	Kruppel-like factor 9	0	13	0.270476
LCK	lymphocyte-specific protein tyrosine kinase	3	2	0.270476
LRIG3	leucine-rich repeats and immunoglobulin-like domains 3	0	3	0.270476
MAN1B1	mannosidase, alpha, class 1B, member 1	3	2	0.270476
MMP3	matrix metallopeptidase 3 (stromelysin 1, progelatinase)	0	3	0.270476
MNAT1	MNAT CDK-activating kinase assembly factor 1	1	1	0.270476
MYRIP	myosin VIIA and Rab interacting protein	0	10	0.270476
NAPRT1	nicotinate phosphoribosyltransferase domain containing 1	0	2	0.270476
NKAIN2	Na+/K+ transporting ATPase interacting 2	0	12	0.270476
NMU	neuromedin U	1	1	0.270476
PTPRR	protein tyrosine phosphatase, receptor type, R	1	6	0.270476
PUM2	pumilio RNA-binding family member 2	0	13	0.270476
RBMS3	RNA binding motif, single stranded interacting protein 3	0	6	0.270476
REN	renin	1	1	0.270476
RNF167	ring finger protein 167	0	1	0.270476
RPS29	ribosomal protein S29	1	2	0.270476
SAFB	scaffold attachment factor B	0	1	0.270476
SALL4	spalt-like transcription factor 4	0	2	0.270476
SLC12A9	solute carrier family 12, member 9	0	2	0.270476
SSBP3	single stranded DNA binding protein 3	0	3	0.270476
TCEAL3	transcription elongation factor A (SII)-like 3	0	1	0.270476
VEZF1	vascular endothelial zinc finger 1	0	13	0.270476
ZC3H3	zinc finger CCCH-type containing 3	0	2	0.270476
ZDHHC9	zinc finger, DHHC-type containing 9	0	9	0.270476
ZNF354A	zinc finger protein 354A	0	2	0.270476
RAB5B	RAB5B, member RAS oncogene family	4	12	0.269407
TIAM1	T-cell lymphoma invasion and metastasis 1	2	12	0.269407
CHD2	chromodomain helicase DNA binding protein 2	0	10	0.269194
ZC3H12B	zinc finger CCCH-type containing 12B	0	19	0.269127
C16ORF70	chromosome 16 open reading frame 70	0	9	0.269052
CBX1	chromobox homolog 1	0	9	0.269052
EFNB3	ephrin-B3	1	9	0.269052
WSB1	WD repeat and SOCS box containing 1	0	9	0.269052
GDA	guanine deaminase	2	17	0.268969
ATP1B1	ATPase, Na+/K+ transporting, beta 1 polypeptide	8	8	0.268876
NTN4	netrin 4	1	8	0.268876
BAIAP2	BAI1-associated protein 2	2	7	0.268648
AP3M1	adaptor-related protein complex 3, mu 1 subunit	1	13	0.268509
IRF2	interferon regulatory factor 2	0	6	0.268347
RANBP9	RAN binding protein 9	0	6	0.268347
CADPS	Ca++-dependent secretion activator	0	5	0.267924
GTF3C2	general transcription factor IIIC, polypeptide 2, beta 110kDa	0	5	0.267924
PRPS2	phosphoribosyl pyrophosphate synthetase 2	3	5	0.267924
PSAP	prosaposin	1	5	0.267924
PTPRZ1	protein tyrosine phosphatase, receptor-type, Z polypeptide 1	1	5	0.267924
SVIL	supervillin	0	5	0.267924
MAPKBP1	mitogen-activated protein kinase binding protein 1	0	9	0.267644
SMOC1	SPARC related modular calcium binding 1	0	9	0.267644
C10ORF104		0	4	0.267295
KCNK1	potassium channel, subfamily K, member 1	0	4	0.267295
NANOS1	nanos homolog 1 (Drosophila)	0	4	0.267295
TBK1	TANK-binding kinase 1	4	4	0.267295
FLRT3	fibronectin leucine rich transmembrane protein 3	0	8	0.267294
FRMD4B	FERM domain containing 4B	0	8	0.267294
HNRNPUL1	heterogeneous nuclear ribonucleoprotein U-like 1	0	8	0.267294
MAX	MYC associated factor X	3	8	0.267294
RB1CC1	RB1-inducible coiled-coil 1	0	8	0.267294
KIF3B	kinesin family member 3B	0	15	0.267085
PRRX1	paired related homeobox 1	0	15	0.267085
NF1	neurofibromin 1	1	11	0.267009
SNN	stannin	0	11	0.267009
DACT1	dishevelled-binding antagonist of beta-catenin 1	0	7	0.266846
FLI1	Fli-1 proto-oncogene, ETS transcription factor	0	7	0.266846
GATA2	GATA binding protein 2	0	7	0.266846
RNF7	ring finger protein 7	1	7	0.266846
[truncated: 6,142 more rows]
