# Supplementary material for: Detecting Differentially Variable MicroRNAs via Model-Based Clustering
Source: Int J Genomics. 2018 Jul 12;2018:6591634. doi: 10.1155/2018/6591634 (PMC6079429; doi:10.1155/2018/6591634)
Supplement: Supplementary Materials — Details about the gs model and its parameter estimation via the EM algorithm. Supplemental Table A1: the list of the 157 DE-only miRNAs. Supplemental Table A2: the list of the 60 DV-and-DE miRNAs. Supplemental Table A3: the list of the 1639 genes targeted by the 7 miRNAs in S DVonly. Supplemental Table A4: the list of the 8141 genes targeted by the 157 miRNAs in S DEonly. Supplemental Table A5: the list of the 6893 genes targeted by the 60 miRNAs in S both. Supplemental Table A6: the list of the 6 KEGG pathways enriched by the 1639 genes targeted by the 7 miRNAs in S DVonly. Supplemental Table A7: the list of the 1 KEGG pathway enriched by the 8141 genes targeted by the 157 miRNAs in S DEonly. Supplemental Table A8: the list of the 2 KEGG pathways enriched by the 6893 genes targeted by the 60 miRNAs in S both. Supplemental Table A9: p values of two-sided Wilcoxon signed rank tests to test if the median Jaccard index obtained by the gs method is the same as that obtained by each of the other 16 methods. Supplemental Table A10: p values of two-sided Wilcoxon signed rank tests to test if the median FPR obtained by the gs method is the same as that obtained by each of the other 16 methods. Supplemental Table A11: p values of two-sided Wilcoxon signed rank tests to test if the median FNR obtained by the gs method is the same as that obtained by each of the other 16 methods. Supplemental Table A12: p values of two-sided Wilcoxon signed rank tests to test if the median proportion of validation obtained by the gs method is the same as that obtained by each of the other 16 methods based on 100 bootstrap samples. Figure A1: the plot of percentiles of log2 expression levels across arrays. Left panel: GSE67138. Right panel: GSE67139. Figure A2: the plot of the first and second principal components. Left panel: GSE67138. Right panel: GSE67139. Supplemental Figure A3: parallel boxplots of the 7 validated DV-only miRNAs. Left panel: GSE67138. Right panel: GSE67139. Supplemental Fi [file 6591634.f1.zip › TableA5_IJG_2364385.csv]

TARGET_GENE	GENE_DESCRIPTION	KEGG	OBSERVED_MIRNA	OE
AK123478		0	1	12.4561
ANIB1	aneurysm, intracranial berry 1	0	1	12.4561
CKIT		0	1	12.4561
LOC92270		0	1	12.4561
SLC5A11	solute carrier family 5 (sodium/inositol cotransporter), member 11	0	4	6.22807
GLRA1	glycine receptor, alpha 1	1	1	4.15205
IFI30	interferon, gamma-inducible protein 30	1	1	4.15205
P2RY5		1	2	4.15205
SSSCA1	Sjogren syndrome/scleroderma autoantigen 1	0	1	4.15205
MICAL1	microtubule associated monooxygenase, calponin and LIM domain containing 1	0	4	3.32163
FRMPD1	FERM and PDZ domain containing 1	0	5	3.27793
KRT126P	keratin 126 pseudogene	0	1	3.11404
GALNT5	UDP-N-acetyl-alpha-D-galactosamine:polypeptide N-acetylgalactosaminyltransferase 5 (GalNAc-T5)	2	2	2.76802
PDIA5	protein disulfide isomerase family A, member 5	0	2	2.76802
PF4	platelet factor 4	2	2	2.76802
PPARGC1B	peroxisome proliferator-activated receptor gamma, coactivator 1 beta	0	7	2.64221
IL1RAPL2	interleukin 1 receptor accessory protein-like 2	0	4	2.62234
ANKRD9	ankyrin repeat domain 9	0	4	2.49123
CORO1A	coronin, actin binding protein, 1A	1	1	2.49123
FDPS	farnesyl diphosphate synthase	2	1	2.49123
SAP30	Sin3A-associated protein, 30kDa	0	4	2.49123
NRTN	neurturin	0	3	2.49122
SMARCA5	SWI/SNF related, matrix associated, actin dependent regulator of chromatin, subfamily a, member 5	0	6	2.41086
PLEKHO1	pleckstrin homology domain containing, family O member 1	0	3	2.33553
KIAA0922	KIAA0922	0	5	2.30669
CCDC28B	coiled-coil domain containing 28B	0	3	2.19814
LRFN2	leucine rich repeat and fibronectin type III domain containing 2	0	6	2.19814
SLC7A10	solute carrier family 7 (neutral amino acid transporter light chain, asc system), member 10	0	4	2.16628
UBC	ubiquitin C	1	4	2.16628
ALAS2	aminolevulinate, delta-, synthase 2	3	1	2.07602
P4HA2	prolyl 4-hydroxylase, alpha polypeptide II	2	8	1.99298
ACTA2	actin, alpha 2, smooth muscle, aorta	1	2	1.91632
MATN3	matrilin 3	0	2	1.91632
TMEM121	transmembrane protein 121	0	5	1.88729
CARS	cysteinyl-tRNA synthetase	1	4	1.84535
SEMA4B	sema domain, immunoglobulin domain (Ig), transmembrane domain (TM) and short cytoplasmic domain, (semaphorin) 4B	1	6	1.82285
CCNK	cyclin K	0	7	1.81652
AKR1B10	aldo-keto reductase family 1, member B10 (aldose reductase)	4	3	1.77945
ERCC6	excision repair cross-complementing rodent repair deficiency, complementation group 6	1	3	1.77945
GNG5	guanine nucleotide binding protein (G protein), gamma 5	1	3	1.77945
QARS	glutaminyl-tRNA synthetase	2	3	1.77945
SOCS1	suppressor of cytokine signaling 1	5	9	1.77945
TFF1	trefoil factor 1	0	1	1.77945
NID2	nidogen 2 (osteonidogen)	0	9	1.75165
LIN7B	lin-7 homolog B (C. elegans)	0	4	1.71809
RTN4R	reticulon 4 receptor	0	4	1.71809
CSDA		1	5	1.63897
LRP5	low density lipoprotein receptor-related protein 5	1	3	1.62471
ACTA1	actin, alpha 1, skeletal muscle	0	5	1.59694
CFDP1	craniofacial development protein 1	0	5	1.59694
CTRL	chymotrypsin-like	2	4	1.55702
FAP	fibroblast activation protein, alpha	0	4	1.55702
HIST1H4A	histone cluster 1, H4a	1	1	1.55702
INTU	inturned planar cell polarity protein	0	2	1.55702
MYH2	myosin, heavy chain 2, skeletal muscle, adult	2	1	1.55702
PCDHB10	protocadherin beta 10	0	1	1.55702
PRPF19	pre-mRNA processing factor 19	2	5	1.55702
YBX1	Y box binding protein 1	0	4	1.55702
ADRB2	adrenoceptor beta 2, surface	4	9	1.53569
VIP	vasoactive intestinal peptide	1	6	1.52524
LRRC8D	leucine rich repeat containing 8 family, member D	0	5	1.51904
SLC25A14	solute carrier family 25 (mitochondrial carrier, brain), member 14	0	5	1.51904
FGF4	fibroblast growth factor 4	4	4	1.50983
FLJ45983		0	4	1.50983
ANKHD1	ankyrin repeat and KH domain containing 1	0	6	1.49474
CHAF1A	chromatin assembly factor 1, subunit A (p150)	0	6	1.49474
MAN1B1	mannosidase, alpha, class 1B, member 1	3	5	1.48287
CLPP	caseinolytic mitochondrial matrix peptidase proteolytic subunit	0	2	1.46543
DHFR	dihydrofolate reductase	3	2	1.46543
SBF1	SET binding factor 1	0	4	1.46543
G6PC3	glucose 6 phosphatase, catalytic, 3	0	3	1.43725
HTR1E	5-hydroxytryptamine (serotonin) receptor 1E, G protein-coupled	1	3	1.43725
NSMCE2	non-SMC element 2, MMS21 homolog (S. cerevisiae)	0	3	1.43725
MAP3K5	mitogen-activated protein kinase kinase kinase 5	4	11	1.42727
RASD1	RAS, dexamethasone-induced 1	0	8	1.42356
RRAD	Ras-related associated with diabetes	0	4	1.42356
UBAC1	UBA domain containing 1	0	4	1.42356
SSBP2	single-stranded DNA binding protein 2	0	6	1.41013
HSPA5	heat shock 70kDa protein 5 (glucose-regulated protein, 78kDa)	4	4	1.38402
JAKMIP2	janus kinase and microtubule interacting protein 2	0	5	1.38402
NDUFS4	NADH dehydrogenase (ubiquinone) Fe-S protein 4, 18kDa (NADH-coenzyme Q reductase)	5	2	1.38402
SORL1	sortilin-related receptor, L(DLR class) A repeats containing	0	4	1.38402
CCDC58	coiled-coil domain containing 58	0	3	1.38401
GPHB5	glycoprotein hormone beta 5	0	1	1.38401
MID2	midline 2	0	1	1.38401
RGS8	regulator of G-protein signaling 8	0	1	1.38401
ZNF642		0	1	1.38401
MAP3K12	mitogen-activated protein kinase kinase kinase 12	1	13	1.36075
NRBP1	nuclear receptor binding protein 1	0	10	1.35393
USP21	ubiquitin specific peptidase 21	0	4	1.34661
KPNA2	karyopherin alpha 2 (RAG cohort 1, importin alpha 1)	0	6	1.33459
RFX6	regulatory factor X, 6	0	8	1.31118
GPR125	G protein-coupled receptor 125	0	4	1.31117
LMLN	leishmanolysin-like (metallopeptidase M8 family)	0	4	1.31117
NAGK	N-acetylglucosamine kinase	1	4	1.31117
RUVBL2	RuvB-like AAA ATPase 2	0	2	1.31117
TNXB	tenascin XB	2	4	1.31117
TSG101	tumor susceptibility 101	1	6	1.31117
TBPL1	TBP-like 1	2	8	1.29414
GPR22	G protein-coupled receptor 22	0	3	1.28857
PAWR	PRKC, apoptosis, WT1, regulator	0	8	1.27755
RAB32	RAB32, member RAS oncogene family	0	4	1.27755
SCYL3	SCY1-like 3 (S. cerevisiae)	0	8	1.27755
FOXL2	forkhead box L2	0	5	1.27103
TRIM71	tripartite motif containing 71, E3 ubiquitin protein ligase	0	5	1.27103
SLC35F3	solute carrier family 35, member F3	0	12	1.26673
GRP	gastrin-releasing peptide	1	2	1.24561
OMG	oligodendrocyte myelin glycoprotein	0	5	1.24561
PDCD10	programmed cell death 10	0	7	1.24561
SLC41A2	solute carrier family 41 (magnesium transporter), member 2	0	5	1.24561
UGT2B28	UDP glucuronosyltransferase 2 family, polypeptide B28	10	1	1.24561
STRBP	spermatid perinuclear RNA binding protein	0	10	1.23328
MDFI	MyoD family inhibitor	0	6	1.22519
MYBL2	v-myb avian myeloblastosis viral oncogene homolog-like 2	0	6	1.22519
MASTL	microtubule associated serine/threonine kinase-like	0	4	1.21523
ZDHHC1	zinc finger, DHHC-type containing 1	0	4	1.21523
MIER2	mesoderm induction early response 1, family member 2	0	10	1.20934
HLX	H2.0-like homeobox	0	6	1.20543
NGF	nerve growth factor (beta polypeptide)	3	3	1.20543
NKX2-2	NK2 homeobox 2	1	6	1.20543
CSN3	casein kappa	0	2	1.1863
SMAD1	SMAD family member 1	1	13	1.17341
C2ORF55		0	6	1.16776
FGD6	FYVE, RhoGEF and PH domain containing 6	0	7	1.16257
CYR61	cysteine-rich, angiogenic inducer, 61	0	4	1.15871
GABRB1	gamma-aminobutyric acid (GABA) A receptor, beta 1	1	4	1.15871
TRIP11	thyroid hormone receptor interactor 11	0	4	1.15871
HSPA8	heat shock 70kDa protein 8	6	5	1.15335
DDIT4	DNA-damage-inducible transcript 4	1	8	1.14539
HOXB8	homeobox B8	0	9	1.14393
AVL9	AVL9 homolog (S. cerevisiase)	0	5	1.13238
C11ORF42	chromosome 11 open reading frame 42	0	2	1.13238
KRT7	keratin 7	0	2	1.13238
RBM6	RNA binding motif protein 6	0	2	1.13238
SUCLG2	succinate-CoA ligase, GDP-forming, beta subunit	3	6	1.13238
ATP5G1	ATP synthase, H+ transporting, mitochondrial Fo complex, subunit C1 (subunit 9)	5	1	1.13237
NDUFA1	NADH dehydrogenase (ubiquinone) 1 alpha subcomplex, 1, 7.5kDa	5	1	1.13237
PON2	paraoxonase 2	1	7	1.13237
CHD7	chromodomain helicase DNA binding protein 7	0	14	1.12507
CHST2	carbohydrate (N-acetylglucosamine-6-O) sulfotransferase 2	1	7	1.11786
RUNDC3A	RUN domain containing 3A	0	6	1.11548
ARID3A	AT rich interactive domain 3A (BRIGHT-like)	0	8	1.10721
FOXD1	forkhead box D1	0	4	1.10721
KCTD7	potassium channel tetramerization domain containing 7	0	4	1.10721
LYN	v-yes-1 Yamaguchi sarcoma viral related oncogene homolog	6	4	1.10721
MAP3K10	mitogen-activated protein kinase kinase kinase 10	1	4	1.10721
TGDS	TDP-glucose 4,6-dehydratase	1	7	1.1037
ABCB9	ATP-binding cassette, sub-family B (MDR/TAP), member 9	2	10	1.10231
CAMK2N2	calcium/calmodulin-dependent protein kinase II inhibitor 2	0	8	1.08315
LRRC17	leucine rich repeat containing 17	0	8	1.08315
NEFM	neurofilament, medium polypeptide	1	8	1.08315
FKBP3	FK506 binding protein 3, 25kDa	0	4	1.08314
GATM	glycine amidinotransferase (L-arginine:glycine amidinotransferase)	3	10	1.08314
ADRA2B	adrenoceptor alpha 2B	1	5	1.07381
BUB1B	BUB1 mitotic checkpoint serine/threonine kinase B	1	3	1.06767
LOC144097		0	3	1.06767
NAP1L3	nucleosome assembly protein 1-like 3	0	7	1.06333
NEFH	neurofilament, heavy polypeptide	1	8	1.0601
SCAMP2	secretory carrier membrane protein 2	0	4	1.0601
TIMM17B	translocase of inner mitochondrial membrane 17 homolog B (yeast)	0	4	1.0601
ZNF367	zinc finger protein 367	0	5	1.05561
PTPN4	protein tyrosine phosphatase, non-receptor type 4 (megakaryocyte)	0	6	1.03802
CD163	CD163 molecule	0	3	1.03801
DOCK7	dedicator of cytokinesis 7	0	5	1.03801
FXR1	fragile X mental retardation, autosomal homolog 1	0	12	1.03801
MYH4	myosin, heavy chain 4, skeletal muscle	2	1	1.03801
PARL	presenilin associated, rhomboid-like	0	1	1.03801
RAP1B	RAP1B, member of RAS oncogene family	8	11	1.03801
RFWD2	ring finger and WD repeat domain 2, E3 ubiquitin protein ligase	2	3	1.03801
RFXANK	regulatory factor X-associated ankyrin-containing protein	2	2	1.03801
RHEBL1	Ras homolog enriched in brain like 1	0	4	1.03801
STK11IP	serine/threonine kinase 11 interacting protein	0	4	1.03801
THOC1	THO complex 1	2	2	1.03801
TRIP10	thyroid hormone receptor interactor 10	1	5	1.03801
C7ORF43	chromosome 7 open reading frame 43	0	9	1.02849
TBC1D15	TBC1 domain family, member 15	0	11	1.02252
FUCA1	fucosidase, alpha-L- 1, tissue	2	5	1.021
E2F5	E2F transcription factor 5, p130-binding	2	9	1.01914
CCL1	chemokine (C-C motif) ligand 1	2	4	1.01683
TGFB1I1	transforming growth factor beta 1 induced transcript 1	0	4	1.01683
PLCL2	phospholipase C-like 2	0	7	1.01387
LRFN5	leucine rich repeat and fibronectin type III domain containing 5	0	3	1.00996
TNKS1BP1	tankyrase 1 binding protein 1, 182kDa	0	5	1.00453
NLK	nemo-like kinase	3	18	1.00094
MARCH8	membrane-associated ring finger (C3HC4) 8, E3 ubiquitin protein ligase	0	8	0.996492
CSRP2	cysteine and glycine-rich protein 2	0	2	0.99649
EEF1A2	eukaryotic translation elongation factor 1 alpha 2	1	2	0.99649
AP2A1	adaptor-related protein complex 2, alpha 1 subunit	2	5	0.988582
GLDC	glycine dehydrogenase (decarboxylating)	2	5	0.988582
TRPV6	transient receptor potential cation channel, subfamily V, member 6	1	5	0.988582
FAM13A1		0	8	0.986622
INHBA	inhibin, beta A	2	6	0.983382
JMJD1A		0	8	0.976952
CDC37L1	cell division cycle 37-like 1	0	9	0.974827
STOX2	storkhead box 2	0	5	0.973136
TMEM110	transmembrane protein 110	0	5	0.973136
FLJ36031		0	12	0.97061
HERC2	HECT and RLD domain containing E3 ubiquitin protein ligase 2	1	7	0.968808
BTBD10	BTB (POZ) domain containing 10	0	10	0.965593
MAPK7	mitogen-activated protein kinase 7	4	4	0.958165
MTTP	microsomal triglyceride transfer protein	0	4	0.958165
VEGFC	vascular endothelial growth factor C	7	2	0.958165
HSP90B1	heat shock protein 90kDa beta (Grp94), member 1	4	3	0.958164
LOR	loricrin	0	3	0.958164
NSMCE4A	non-SMC element 4 homolog A (S. cerevisiae)	0	1	0.958162
SCRG1	stimulator of chondrogenesis 1	0	1	0.958162
CHD9	chromodomain helicase DNA binding protein 9	0	21	0.951196
UXS1	UDP-glucuronate decarboxylase 1	3	8	0.949041
LMBR1L	limb development membrane protein 1-like	0	7	0.947753
SNAI1	snail family zinc finger 1	1	7	0.947753
STK39	serine threonine kinase 39	0	13	0.946958
DOC2A	double C2-like domains, alpha	0	5	0.943647
ATP2A2	ATPase, Ca++ transporting, cardiac muscle, slow twitch 2	7	13	0.941451
TET1	tet methylcytosine dioxygenase 1	0	13	0.941451
ATP6V1F	ATPase, H+ transporting, lysosomal 14kDa, V1 subunit F	6	4	0.940086
MLL4		0	4	0.940086
PRG4	proteoglycan 4	0	4	0.940086
PKIA	protein kinase (cAMP-dependent, catalytic) inhibitor alpha	0	13	0.93601
ID3	inhibitor of DNA binding 3, dominant negative helix-loop-helix protein	1	3	0.934211
MESDC1	mesoderm development candidate 1	0	6	0.934211
RAPGEF4	Rap guanine nucleotide exchange factor (GEF) 4	1	9	0.934211
DET1	de-etiolated homolog 1 (Arabidopsis)	1	5	0.929563
GRM3	glutamate receptor, metabotropic 3	1	5	0.929563
IFNG	interferon, gamma	17	5	0.929563
TANK	TRAF family member-associated NFKB activator	1	5	0.929563
HAS2	hyaluronan synthase 2	0	10	0.922676
CA10	carbonic anhydrase X	0	12	0.917018
KIF26B	kinesin family member 26B	0	5	0.915892
PIP4K2A	phosphatidylinositol-5-phosphate 4-kinase, type II, alpha	3	5	0.915892
CPEB3	cytoplasmic polyadenylation element binding protein 3	0	24	0.911425
DDX19B	DEAD (Asp-Glu-Ala-Asp) box polypeptide 19B	0	3	0.911425
PTPN21	protein tyrosine phosphatase, non-receptor type 21	0	6	0.911425
KPNB1	karyopherin (importin) beta 1	1	10	0.909206
ITFG1	integrin alpha FG-GAP repeat containing 1	0	4	0.905901
STK11	serine/threonine kinase 11	2	4	0.905901
SEMA4C	sema domain, immunoglobulin domain (Ig), transmembrane domain (TM) and short cytoplasmic domain, (semaphorin) 4C	1	8	0.905899
GFPT2	glutamine-fructose-6-phosphate transaminase 2	3	9	0.904074
GOLGA4	golgin A4	0	9	0.904074
ADRA1B	adrenoceptor alpha 1B	4	5	0.902619
NEK4	NIMA-related kinase 4	0	5	0.902619
PTH	parathyroid hormone	1	5	0.902619
JARID2	jumonji, AT rich interactive domain 2	0	16	0.901801
ABCB6	ATP-binding cassette, sub-family B (MDR/TAP), member 6	1	1	0.889725
AR	androgen receptor	3	4	0.889725
BRWD3	bromodomain and WD repeat domain containing 3	0	3	0.889725
C19ORF70	chromosome 19 open reading frame 70	0	1	0.889725
CCT6B	chaperonin containing TCP1, subunit 6B (zeta 2)	0	1	0.889725
EIF2C2		0	7	0.889725
GPX7	glutathione peroxidase 7	2	4	0.889725
IGSF8	immunoglobulin superfamily, member 8	0	1	0.889725
KIAA1787		0	2	0.889725
MOSPD3	motile sperm domain containing 3	0	2	0.889725
PRKD2	protein kinase D2	0	1	0.889725
RHOC	ras homolog family member C	0	4	0.889725
SLC12A9	solute carrier family 12, member 9	0	3	0.889725
ZC3H3	zinc finger CCCH-type containing 3	0	3	0.889725
ZNF354A	zinc finger protein 354A	0	3	0.889725
KIAA1370		0	5	0.889724
PDSS1	prenyl (decaprenyl) diphosphate synthase, subunit 1	1	5	0.889724
PGM1	phosphoglucomutase 1	7	5	0.889724
ZNF608	zinc finger protein 608	0	10	0.883412
NEUROD6	neuronal differentiation 6	0	7	0.880735
GRLF1		3	5	0.877193
PDE6D	phosphodiesterase 6D, cGMP-specific, rod, delta	1	5	0.877193
C15ORF29		0	13	0.875298
DSG4	desmoglein 4	0	4	0.874115
STX17	syntaxin 17	1	11	0.8672
PNKD	paroxysmal nonkinesigenic dyskinesia	0	13	0.865936
ARF4	ADP-ribosylation factor 4	0	7	0.863294
UBE2F	ubiquitin-conjugating enzyme E2F (putative)	1	6	0.859046
BTG3	BTG family, member 3	0	4	0.859045
C13ORF15		0	4	0.859045
DYRK1B	dual-specificity tyrosine-(Y)-phosphorylation regulated kinase 1B	0	4	0.859045
IKBKE	inhibitor of kappa light polypeptide gene enhancer in B-cells, kinase epsilon	4	4	0.859045
KCNJ12	potassium inwardly-rectifying channel, subfamily J, member 12	0	4	0.859045
MTA1	metastasis associated 1	0	4	0.859045
PRICKLE1	prickle homolog 1 (Drosophila)	1	4	0.859045
SFRS8		0	2	0.859044
TUBA1A	tubulin, alpha 1a	3	2	0.859044
TNRC6A	trinucleotide repeat containing 6A	0	16	0.855357
FAM83F	family with sequence similarity 83, member F	0	5	0.853159
SNX16	sorting nexin 16	0	15	0.853159
CBLB	Cbl proto-oncogene B, E3 ubiquitin protein ligase	9	9	0.849285
SATB1	SATB homeobox 1	0	9	0.849285
GPATCH3	G patch domain containing 3	0	3	0.849283
MLL3		0	15	0.849283
XPO1	exportin 1 (CRM1 homolog, yeast)	1	7	0.846536
ZFYVE26	zinc finger, FYVE domain containing 26	0	14	0.846533
ANKRA2	ankyrin repeat, family A (RFXANK-like), 2	0	4	0.844484
HAND1	heart and neural crest derivatives expressed 1	0	4	0.844484
ZNF791	zinc finger protein 791	0	4	0.844484
PPP2R2A	protein phosphatase 2, regulatory subunit B, alpha	3	5	0.841634
SEC23IP	SEC23 interacting protein	0	5	0.841634
KLF10	Kruppel-like factor 10	0	10	0.84163
HECTD2	HECT domain containing E3 ubiquitin protein ligase 2	0	16	0.837388
CCNE2	cyclin E2	6	10	0.835983
COL24A1	collagen, type XXIV, alpha 1	0	10	0.835983
SNAP25	synaptosomal-associated protein, 25kDa	1	11	0.830411
CCL7	chemokine (C-C motif) ligand 7	3	4	0.83041
GLTP	glycolipid transfer protein	0	2	0.83041
PDZK1IP1	PDZK1 interacting protein 1	0	2	0.83041
PUNC		0	4	0.83041
AP1GBP1		0	3	0.830409
LHX4	LIM homeobox 4	0	5	0.830408
ODF1	outer dense fiber of sperm tails 1	0	1	0.830408
RHBDL1	rhomboid, veinlet-like 1 (Drosophila)	0	1	0.830408
RPAP3	RNA polymerase II associated protein 3	0	1	0.830408
PSMD7	proteasome (prosome, macropain) 26S subunit, non-ATPase, 7	1	6	0.830406
SATB2	SATB homeobox 2	0	19	0.827506
CHKA	choline kinase alpha	2	8	0.823544
EED	embryonic ectoderm development	0	8	0.823544
EGLN2	egl-9 family hypoxia-inducible factor 2	2	5	0.819485
PRTG	protogenin	0	5	0.819485
REV1	REV1, polymerase (DNA directed)	0	5	0.819485
TTLL7	tubulin tyrosine ligase-like family, member 7	0	5	0.819485
DNAJB9	DnaJ (Hsp40) homolog, subfamily B, member 9	0	10	0.819481
PLS1	plastin 1	0	10	0.819481
STAG1	stromal antigen 1	1	9	0.818286
ZNF385A	zinc finger protein 385A	0	9	0.818286
LYST	lysosomal trafficking regulator	0	12	0.816798
CAT	catalase	4	4	0.816796
IRF1	interferon regulatory factor 1	1	8	0.816796
IRX4	iroquois homeobox 4	0	4	0.816796
KIAA1109	KIAA1109	0	4	0.816796
UCP3	uncoupling protein 3 (mitochondrial, proton carrier)	0	8	0.816796
ZNF597	zinc finger protein 597	0	4	0.816796
BIRC6	baculoviral IAP repeat containing 6	1	7	0.814889
MAT2A	methionine adenosyltransferase II, alpha	3	13	0.813717
CHD8	chromodomain helicase DNA binding protein 8	1	3	0.812357
NEDD8	neural precursor cell expressed, developmentally down-regulated 8	0	3	0.812357
PLD3	phospholipase D family, member 3	0	3	0.812357
AHNAK	AHNAK nucleoprotein	0	8	0.810158
IRS1	insulin receptor substrate 1	5	8	0.810158
CFL2	cofilin 2 (muscle)	3	18	0.806513
REV3L	REV3-like, polymerase (DNA directed), zeta, catalytic subunit	1	9	0.806511
ATL3	atlastin GTPase 3	0	4	0.803622
C12ORF35		0	4	0.803622
IL6	interleukin 6 (interferon, beta 2)	14	4	0.803622
SLC25A4	solute carrier family 25 (mitochondrial carrier; adenine nucleotide translocator), member 4	3	4	0.803622
DNAJC13	DnaJ (Hsp40) homolog, subfamily C, member 13	0	8	0.803621
PAPOLB	poly(A) polymerase beta (testis specific)	1	8	0.803621
ZNF238		0	17	0.8021
CBFA2T3	core-binding factor, runt domain, alpha subunit 2; translocated to, 3	0	11	0.801272
YTHDF3	YTH domain family, member 3	0	18	0.800752
CPEB4	cytoplasmic polyadenylation element binding protein 4	0	21	0.799936
TLK2	tousled-like kinase 2	0	7	0.799936
B3GNT1	UDP-GlcNAc:betaGal beta-1,3-N-acetylglucosaminyltransferase 1	3	5	0.798472
BAHD1	bromo adjacent homology domain containing 1	0	15	0.798472
RSBN1L	round spermatid basic protein 1-like	0	5	0.798472
GALNT7	UDP-N-acetyl-alpha-D-galactosamine:polypeptide N-acetylgalactosaminyltransferase 7 (GalNAc-T7)	2	14	0.796282
RAB4B	RAB4B, member RAS oncogene family	0	6	0.795075
KRT5	keratin 5	0	3	0.795073
RPN2	ribophorin II	3	3	0.795073
SIRT1	sirtuin 1	0	13	0.793773
RNF6	ring finger protein (C3H2C3 type) 6	0	7	0.792661
EZH2	enhancer of zeste homolog 2 (Drosophila)	0	4	0.790866
MMP3	matrix metallopeptidase 3 (stromelysin 1, progelatinase)	0	4	0.790866
SMARCD2	SWI/SNF related, matrix associated, actin dependent regulator of chromatin, subfamily d, member 2	0	9	0.789474
BRD1	bromodomain containing 1	0	10	0.788364
MCF2	MCF.2 cell line derived transforming sequence	0	5	0.788361
CALCR	calcitonin receptor	1	12	0.786703
RND3	Rho family GTPase 3	0	13	0.786067
SEC24C	SEC24 family member C	1	8	0.78464
ACVR2A	activin A receptor, type IIA	2	18	0.781222
GOT2	glutamic-oxaloacetic transaminase 2, mitochondrial	7	7	0.778511
IER5	immediate early response 5	0	6	0.77851
NDEL1	nudE neurodevelopment protein 1-like 1	0	11	0.77851
ADAMTS10	ADAM metallopeptidase with thrombospondin type 1 motif, 10	0	3	0.778509
CAMTA2	calmodulin binding transcription activator 2	0	5	0.778509
CCDC71	coiled-coil domain containing 71	0	3	0.778509
CCL3	chemokine (C-C motif) ligand 3	4	3	0.778509
DAD1	defender against cell death 1	3	3	0.778509
DDI2	DNA-damage inducible 1 homolog 2 (S. cerevisiae)	0	3	0.778509
DDX5	DEAD (Asp-Glu-Ala-Asp) box helicase 5	1	4	0.778509
FAM113A		0	1	0.778509
MIZF		0	1	0.778509
NTS	neurotensin	1	3	0.778509
RLBP1L2		0	1	0.778509
RNF5	ring finger protein 5, E3 ubiquitin protein ligase	1	3	0.778509
CAMK2N1	calcium/calmodulin-dependent protein kinase II inhibitor 1	0	9	0.778508
EGR3	early growth response 3	0	18	0.778508
LHX8	LIM homeobox 8	0	8	0.778507
ATP2B1	ATPase, Ca++ transporting, plasma membrane 1	3	20	0.776083
C14ORF28	chromosome 14 open reading frame 28	0	11	0.77411
EIF4G2	eukaryotic translation initiation factor 4 gamma, 2	2	9	0.773141
MARCH6	membrane-associated ring finger (C3HC4) 6, E3 ubiquitin protein ligase	1	9	0.773141
ITGA5	integrin, alpha 5 (fibronectin receptor, alpha polypeptide)	10	8	0.772474
COL1A2	collagen, type I, alpha 2	4	6	0.770481
MORF4L1	mortality factor 4 like 1	0	6	0.770481
PANX2	pannexin 2	0	6	0.770481
CEP135	centrosomal protein 135kDa	0	10	0.768898
ESPN	espin	0	5	0.768894
GRM5	glutamate receptor, metabotropic 5	6	5	0.768894
RLF	rearranged L-myc fusion	0	5	0.768894
USP44	ubiquitin specific peptidase 44	0	5	0.768894
ADRB1	adrenoceptor beta 1	6	9	0.767844
MEIS2	Meis homeobox 2	0	16	0.766532
HOXA1	homeobox A1	0	12	0.766531
SALL1	spalt-like transcription factor 1	0	8	0.76653
TAF5	TAF5 RNA polymerase II, TATA box binding protein (TBP)-associated factor, 100kDa	1	8	0.76653
CTDSPL2	CTD (carboxy-terminal domain, RNA polymerase II, polypeptide A) small phosphatase like 2	0	17	0.764456
IDH1	isocitrate dehydrogenase 1 (NADP+), soluble	4	6	0.762622
JAK1	Janus kinase 1	6	9	0.762622
FAM126B	family with sequence similarity 126, member B	0	14	0.761511
NOVA1	neuro-oncological ventral antigen 1	0	16	0.76068
KIAA2026	KIAA2026	0	5	0.75952
NOL4	nucleolar protein 4	0	10	0.75952
SMAD6	SMAD family member 6	2	5	0.75952
PAK7	p21 protein (Cdc42/Rac)-activated kinase 7	6	14	0.758199
YPEL4	yippee-like 4 (Drosophila)	0	7	0.758199
GIGYF1	GRB10 interacting GYF protein 1	0	16	0.757787
DEPDC1B	DEP domain containing 1B	0	4	0.754918
HOXA5	homeobox A5	0	4	0.754918
PITX1	paired-like homeodomain 1	0	4	0.754918
BAI2	brain-specific angiogenesis inhibitor 2	0	2	0.754917
DNAJC7	DnaJ (Hsp40) homolog, subfamily C, member 7	0	2	0.754917
TMSB10	thymosin beta 10	0	2	0.754917
JMJD3		0	6	0.754916
RB1	retinoblastoma 1	10	11	0.752844
UBE2D1	ubiquitin-conjugating enzyme E2D 1	2	11	0.752844
PFN2	profilin 2	2	14	0.751663
COL15A1	collagen, type XV, alpha 1	1	5	0.750373
NAGPA	N-acetylglucosamine-1-phosphodiester alpha-N-acetylglucosaminidase	1	5	0.750373
C13ORF23		0	8	0.749241
COIL	coilin	0	6	0.747369
NARS2	asparaginyl-tRNA synthetase 2, mitochondrial (putative)	1	3	0.747369
TPT1	tumor protein, translationally-controlled 1	0	3	0.747369
ZFYVE9	zinc finger, FYVE domain containing 9	2	6	0.747369
DLL4	delta-like 4 (Drosophila)	1	9	0.747367
KLHL20	kelch-like family member 20	0	10	0.745878
MFHAS1	malignant fibrous histiocytoma amplified sequence 1	0	10	0.745878
MKRN3	makorin ring finger protein 3	0	7	0.745238
LAPTM4A	lysosomal protein transmembrane 4 alpha	1	4	0.74365
PSD	pleckstrin and Sec7 domain containing	1	4	0.74365
TBC1D10C	TBC1 domain family, member 10C	0	4	0.74365
RARG	retinoic acid receptor, gamma	0	9	0.742419
ATAD2	ATPase family, AAA domain containing 2	0	5	0.741436
SLC4A7	solute carrier family 4, sodium bicarbonate cotransporter, member 7	0	17	0.7404
SHOC2	soc-2 suppressor of clear homolog (C. elegans)	0	12	0.739969
VSNL1	visinin-like 1	0	6	0.739966
ERBB3	v-erb-b2 avian erythroblastic leukemia viral oncogene homolog 3	3	9	0.737533
ZNF644	zinc finger protein 644	0	10	0.73705
CRIPT	cysteine-rich PDZ-binding protein	0	5	0.732716
NANOS1	nanos homolog 1 (Drosophila)	0	5	0.732716
ANKRD13C	ankyrin repeat domain 13C	0	8	0.732715
ENOX1	ecto-NOX disulfide-thiol exchanger 1	0	2	0.732715
FAF1	Fas (TNFRSF6) associated factor 1	0	2	0.732715
FETUB	fetuin B	0	2	0.732715
GH2	growth hormone 2	3	2	0.732715
MFSD2		0	2	0.732715
NRBF2	nuclear receptor binding factor 2	0	8	0.732715
PDE3B	phosphodiesterase 3B, cGMP-inhibited	3	8	0.732715
BAZ2B	bromodomain adjacent to zinc finger domain, 2B	0	12	0.732714
BCAT2	branched chain amino-acid transaminase 2, mitochondrial	4	3	0.732714
FHOD3	formin homology 2 domain containing 3	0	4	0.732714
GOLSYN		0	6	0.732714
LACE1	lactation elevated 1	0	4	0.732714
LRRC40	leucine rich repeat containing 40	0	4	0.732714
NEK3	NIMA-related kinase 3	0	3	0.732714
SENP5	SUMO1/sentrin specific peptidase 5	0	4	0.732714
TRAF3	TNF receptor-associated factor 3	5	4	0.732714
CCDC19	coiled-coil domain containing 19	0	1	0.732713
EXOSC7	exosome component 7	1	1	0.732713
RARB	retinoic acid receptor, beta	3	12	0.729141
OXR1	oxidation resistance 1	0	11	0.728816
BCL6	B-cell CLL/lymphoma 6	0	9	0.727958
EPC2	enhancer of polycomb homolog 2 (Drosophila)	0	8	0.727365
GALNTL2		2	7	0.726609
CECR6	cat eye syndrome chromosome region, candidate 6	0	13	0.726142
MIER3	mesoderm induction early response 1, family member 3	0	19	0.725971
RSF1	remodeling and spacing factor 1	0	6	0.725603
PURA	purine-rich element binding protein A	0	11	0.724961
STX6	syntaxin 6	1	16	0.724721
P4HA1	prolyl 4-hydroxylase, alpha polypeptide I	2	5	0.724193
WEE1	WEE1 G2 checkpoint kinase	1	10	0.724193
ZIC2	Zic family member 2	1	5	0.724193
RAPGEF2	Rap guanine nucleotide exchange factor (GEF) 2	1	14	0.723592
RIPK5		0	8	0.722096
PBK	PDZ binding kinase	0	4	0.722095
PRKCD	protein kinase C, delta	8	4	0.722095
SEMA6B	sema domain, transmembrane domain (TM), and cytoplasmic domain, (semaphorin) 6B	1	4	0.722095
YBX2	Y box binding protein 2	0	4	0.722095
SOCS6	suppressor of cytokine signaling 6	0	17	0.720254
DEDD	death effector domain containing	0	9	0.718624
FAM184A	family with sequence similarity 184, member A	0	3	0.718624
FBXO39	F-box protein 39	0	3	0.718624
PTPRD	protein tyrosine phosphatase, receptor type, D	0	21	0.718624
RGL2	ral guanine nucleotide dissociation stimulator-like 2	0	3	0.718624
SLC25A18	solute carrier family 25 (glutamate carrier), member 18	0	3	0.718624
TMEFF1	transmembrane protein with EGF-like and two follistatin-like domains 1	0	6	0.718623
PPP3R1	protein phosphatase 3, regulatory subunit B, alpha	13	14	0.717637
PRDM1	PR domain containing 1, with ZNF domain	0	13	0.716503
NEUROG1	neurogenin 1	0	5	0.715871
BBC3	BCL2 binding component 3	2	7	0.714697
KPNA3	karyopherin alpha 3 (importin alpha 4)	0	15	0.713138
DOCK10	dedicator of cytokinesis 10	0	6	0.711781
RAB30	RAB30, member RAS oncogene family	0	6	0.711781
ZNF521	zinc finger protein 521	0	6	0.711781
ACTN1	actinin, alpha 1	8	4	0.711779
C1ORF63	chromosome 1 open reading frame 63	0	4	0.711779
P2RX4	purinergic receptor P2X, ligand-gated ion channel, 4	2	4	0.711779
ST14	suppression of tumorigenicity 14 (colon carcinoma)	0	2	0.711779
TSPAN8	tetraspanin 8	0	2	0.711779
GJA1	gap junction protein, alpha 1, 43kDa	2	11	0.709935
PCDH9	protocadherin 9	0	11	0.709935
MARK1	MAP/microtubule affinity-regulating kinase 1	0	12	0.708406
SDAD1	SDA1 domain containing 1	0	5	0.707733
SCN1A	sodium channel, voltage-gated, type I, alpha subunit	0	13	0.707118
MYCN	v-myc avian myelocytomatosis viral oncogene neuroblastoma derived homolog	0	9	0.705063
CNR1	cannabinoid receptor 1 (brain)	1	17	0.703502
HOXC11	homeobox C11	0	7	0.703169
SKI	v-ski avian sarcoma viral oncogene homolog	0	7	0.703169
DYRK1A	dual-specificity tyrosine-(Y)-phosphorylation regulated kinase 1A	0	22	0.702654
ARL6IP6	ADP-ribosylation-like factor 6 interacting protein 6	0	8	0.701754
DHX57	DEAH (Asp-Glu-Ala-Asp/His) box polypeptide 57	0	4	0.701754
UBR5	ubiquitin protein ligase E3 component n-recognin 5	1	8	0.701754
ANO4	anoctamin 4	0	5	0.699784
FGD1	FYVE, RhoGEF and PH domain containing 1	1	5	0.699784
PHF1	PHD finger protein 1	0	5	0.699784
SACS	spastic ataxia of Charlevoix-Saguenay (sacsin)	0	10	0.699784
SMAP1	small ArfGAP 1	1	10	0.699784
ZCCHC5	zinc finger, CCHC domain containing 5	0	5	0.699784
PTPN13	protein tyrosine phosphatase, non-receptor type 13 (APO-1/CD95 (Fas)-associated phosphatase)	0	6	0.698476
NCOR2	nuclear receptor corepressor 2	1	7	0.697545
C7ORF60	chromosome 7 open reading frame 60	0	14	0.697543
PPP3CA	protein phosphatase 3, catalytic subunit, alpha isozyme	13	14	0.697543
CCNT2	cyclin T2	0	15	0.697172
MYH10	myosin, heavy chain 10, non-muscle	3	10	0.695873
MAGI2	membrane associated guanylate kinase, WW and PDZ domain containing 2	1	12	0.695226
DCUN1D3	DCN1, defective in cullin neddylation 1, domain containing 3	0	13	0.694978
PLAG1	pleiomorphic adenoma gene 1	0	22	0.69376
ASB3	ankyrin repeat and SOCS box containing 3	0	4	0.692011
CAMK4	calcium/calmodulin-dependent protein kinase IV	3	4	0.692011
RACGAP1	Rac GTPase activating protein 1	0	4	0.692011
CDK5	cyclin-dependent kinase 5	2	1	0.692008
CDKN3	cyclin-dependent kinase inhibitor 3	0	1	0.692008
COX5A	cytochrome c oxidase subunit Va	6	1	0.692008
DTX2	deltex homolog 2 (Drosophila)	1	3	0.692008
HRASLS	HRAS-like suppressor	0	1	0.692008
LAMA2	laminin, alpha 2	10	1	0.692008
LGALS1	lectin, galactoside-binding, soluble, 1	0	1	0.692008
MCM3AP	minichromosome maintenance complex component 3 associated protein	0	1	0.692008
MYCBP	MYC binding protein	0	10	0.692008
NDUFA2	NADH dehydrogenase (ubiquinone) 1 alpha subcomplex, 2, 8kDa	5	1	0.692008
PRR7	proline rich 7 (synaptic)	0	1	0.692008
TIMM8B	translocase of inner mitochondrial membrane 8 homolog B (yeast)	0	1	0.692008
ELAVL2	ELAV like neuron-specific RNA binding protein 2	0	15	0.692007
IL8	interleukin 8	13	6	0.692006
SLC40A1	solute carrier family 40 (iron-regulated transporter), member 1	0	6	0.692006
RGS2	regulator of G-protein signaling 2, 24kDa	0	5	0.692005
FNDC3B	fibronectin type III domain containing 3B	0	20	0.69009
CNGB3	cyclic nucleotide gated channel beta 3	0	8	0.687236
DRD1	dopamine receptor D1	3	7	0.68656
EGLN1	egl-9 family hypoxia-inducible factor 1	2	6	0.68566
DGKZ	diacylglycerol kinase, zeta	4	5	0.684403
CEP76	centrosomal protein 76kDa	0	4	0.682528
FJX1	four jointed box 1 (Drosophila)	0	4	0.682528
GMCL1	germ cell-less, spermatogenesis associated 1	0	4	0.682528
GRAMD1A	GRAM domain containing 1A	0	4	0.682528
SCN9A	sodium channel, voltage-gated, type IX, alpha subunit	0	4	0.682528
SNX2	sorting nexin 2	0	4	0.682528
CAMK2D	calcium/calmodulin-dependent protein kinase II delta	11	15	0.681906
NRK	Nik related kinase	0	14	0.681196
RAP2C	RAP2C, member of RAS oncogene family	0	13	0.680378
CEBPA	CCAAT/enhancer binding protein (C/EBP), alpha	2	3	0.679426
SNRPC	small nuclear ribonucleoprotein polypeptide C	1	3	0.679426
CNTD1	cyclin N-terminal domain containing 1	0	6	0.679424
DUSP2	dual specificity phosphatase 2	1	6	0.679424
RBBP7	retinoblastoma binding protein 7	0	6	0.679424
ACVR1	activin A receptor, type I	2	8	0.677886
HMGB3	high mobility group box 3	0	13	0.67753
STX5	syntaxin 5	1	5	0.676967
TP53INP1	tumor protein p53 inducible nuclear protein 1	0	21	0.675915
BNIP3L	BCL2/adenovirus E1B 19kDa interacting protein 3-like	0	13	0.674708
MAP3K3	mitogen-activated protein kinase kinase kinase 3	3	15	0.67452
CSF1R	colony stimulating factor 1 receptor	4	4	0.673307
PGGT1B	protein geranylgeranyltransferase type I, beta subunit	0	4	0.673307
SNRPD3	small nuclear ribonucleoprotein D3 polypeptide 18kDa	2	4	0.673307
STK17B	serine/threonine kinase 17b	0	4	0.673307
GNAI2	guanine nucleotide binding protein (G protein), alpha inhibiting activity polypeptide 2	11	6	0.673305
LAMA5	laminin, alpha 5	6	2	0.673305
TMEM87A	transmembrane protein 87A	0	8	0.673304
RASGEF1A	RasGEF domain family, member 1A	0	11	0.671655
KCTD3	potassium channel tetramerization domain containing 3	0	5	0.669685
PRKRIR	protein-kinase, interferon-inducible double stranded RNA dependent inhibitor, repressor of (P58 repressor)	0	5	0.669685
OTUD4	OTU domain containing 4	0	19	0.668549
CHFR	checkpoint with forkhead and ring finger domains, E3 ubiquitin protein ligase	0	6	0.667295
FAM45A	family with sequence similarity 45, member A	0	6	0.667295
TRIM3	tripartite motif containing 3	0	6	0.667295
CTCF	CCCTC-binding factor (zinc finger protein)	0	9	0.667292
MARCH4	membrane-associated ring finger (C3HC4) 4, E3 ubiquitin protein ligase	0	9	0.667292
CEP120	centrosomal protein 120kDa	0	7	0.665595
YES1	v-yes-1 Yamaguchi sarcoma viral oncogene homolog 1	2	14	0.665595
FAM104A	family with sequence similarity 104, member A	0	11	0.665133
MINK1	misshapen-like kinase 1	0	8	0.664326
PFKP	phosphofructokinase, platelet	5	4	0.664326
PNN	pinin, desmosome associated protein	1	4	0.664326
SUV420H2	suppressor of variegation 4-20 homolog 2 (Drosophila)	1	4	0.664326
TMOD2	tropomodulin 2 (neuronal)	0	8	0.664326
TTC39C	tetratricopeptide repeat domain 39C	0	4	0.664326
ITGA6	integrin, alpha 6	11	10	0.66256
SLCO5A1	solute carrier organic anion transporter family, member 5A1	0	6	0.661388
CHST1	carbohydrate (keratan sulfate Gal-6) sulfotransferase 1	1	7	0.660555
LGI1	leucine-rich, glioma inactivated 1	0	7	0.660555
UBE2I	ubiquitin-conjugating enzyme E2I	2	7	0.660555
COL4A1	collagen, type IV, alpha 1	6	9	0.659442
EEA1	early endosome antigen 1	2	12	0.658475
DOCK4	dedicator of cytokinesis 4	0	13	0.658251
CPSF4	cleavage and polyadenylation specific factor 4, 30kDa	0	4	0.655588
CSNK1D	casein kinase 1, delta	3	4	0.655588
RNF146	ring finger protein 146	0	6	0.655588
STOML1	stomatin (EPB72)-like 1	0	4	0.655588
TBC1D17	TBC1 domain family, member 17	0	4	0.655588
TNFSF9	tumor necrosis factor (ligand) superfamily, member 9	1	4	0.655588
COL7A1	collagen, type VII, alpha 1	0	2	0.655587
NR1D1	nuclear receptor subfamily 1, group D, member 1	1	2	0.655587
RRAS	related RAS viral (r-ras) oncogene homolog	3	2	0.655587
SCRT2	scratch family zinc finger 2	0	9	0.655587
UQCRFS1	ubiquinol-cytochrome c reductase, Rieske iron-sulfur polypeptide 1	6	2	0.655587
NHS	Nance-Horan syndrome (congenital cataracts and dental anomalies)	0	14	0.655586
FGF21	fibroblast growth factor 21	4	1	0.655585
FSCN3	fascin homolog 3, actin-bundling protein, testicular (Strongylocentrotus purpuratus)	0	1	0.655585
KARS	lysyl-tRNA synthetase	1	1	0.655585
PSMB8	proteasome (prosome, macropain) subunit, beta type, 8	1	1	0.655585
RGS17	regulator of G-protein signaling 17	0	5	0.655585
CALD1	caldesmon 1	1	15	0.653294
PDS5B	PDS5, regulator of cohesion maintenance, homolog B (S. cerevisiae)	0	14	0.653132
ZNF362	zinc finger protein 362	0	12	0.652724
PLEKHO2	pleckstrin homology domain containing, family O member 2	1	10	0.652154
KBTBD8	kelch repeat and BTB (POZ) domain containing 8	0	14	0.650694
BCO2	beta-carotene oxygenase 2	0	6	0.649885
MGEA5	meningioma expressed antigen 5 (hyaluronidase)	0	12	0.649885
PTP4A2	protein tyrosine phosphatase type IVA, member 2	0	6	0.649885
CAMTA1	calmodulin binding transcription activator 1	0	17	0.649553
CALB2	calbindin 2	0	5	0.648759
SUV420H1	suppressor of variegation 4-20 homolog 1 (Drosophila)	1	10	0.648756
DERL2	derlin 2	1	4	0.64707
MEIS3	Meis homeobox 3	0	4	0.64707
MEX3D	mex-3 RNA binding family member D	0	4	0.64707
TCP11L1	t-complex 11, testis-specific-like 1	0	4	0.64707
ZNF583	zinc finger protein 583	0	4	0.64707
MSI1	musashi RNA-binding protein 1	0	7	0.645873
ATXN1	ataxin 1	0	24	0.645674
ACP2	acid phosphatase 2, lysosomal	2	6	0.644284
C8ORF4	chromosome 8 open reading frame 4	0	9	0.644284
C9ORF86		0	6	0.644284
SMOC2	SPARC related modular calcium binding 2	0	6	0.644284
USP48	ubiquitin specific peptidase 48	0	6	0.644284
CDC34	cell division cycle 34	1	3	0.644283
ONECUT1	one cut homeobox 1	1	3	0.644283
MNT	MNT, MAX dimerization protein	0	12	0.644282
CTSK	cathepsin K	2	5	0.642068
USP42	ubiquitin specific peptidase 42	0	5	0.642068
SOX4	SRY (sex determining region Y)-box 4	0	12	0.641518
ARID1A	AT rich interactive domain 1A (SWI-like)	0	7	0.641126
GOLGA1	golgin A1	0	11	0.64027
AP1B1	adaptor-related protein complex 1, beta 1 subunit	1	4	0.638777
NPAS2	neuronal PAS domain protein 2	1	8	0.638777
PRR16	proline rich 16	0	4	0.638777
UNC5C	unc-5 homolog C (C. elegans)	1	4	0.638777
VEGFA	vascular endothelial growth factor A	8	12	0.638777
MRPL33	mitochondrial ribosomal protein L33	0	2	0.638776
F3	coagulation factor III (thromboplastin, tissue factor)	1	6	0.638775
MIS12	MIS12 kinetochore complex component	0	6	0.638775
PPP6C	protein phosphatase 6, catalytic subunit	0	6	0.638775
PHTF2	putative homeodomain transcription factor 2	0	13	0.63752
GLT8D3		0	11	0.637291
ASAP1	ArfGAP with SH3 domain, ankyrin repeat and PH domain 1	2	14	0.636446
ADAM9	ADAM metallopeptidase domain 9	0	12	0.636058
IRS2	insulin receptor substrate 2	5	12	0.636058
ATG5	autophagy related 5	3	10	0.635518
MAB21L1	mab-21-like 1 (C. elegans)	0	5	0.635518
RSRC2	arginine/serine-rich coiled-coil 2	0	5	0.635518
NEDD4L	neural precursor cell expressed, developmentally down-regulated 4-like, E3 ubiquitin protein ligase	3	11	0.634341
VAV3	vav 3 guanine nucleotide exchange factor	9	11	0.634341
FAM117A	family with sequence similarity 117, member A	0	6	0.633364
HCN4	hyperpolarization activated cyclic nucleotide-gated potassium channel 4	0	6	0.633364
KCNJ3	potassium inwardly-rectifying channel, subfamily J, member 3	0	6	0.633364
MAP3K11	mitogen-activated protein kinase kinase kinase 11	1	6	0.633364
SIP1		1	3	0.633363
SLC39A10	solute carrier family 39 (zinc transporter), member 10	0	13	0.632539
CSMD3	CUB and Sushi multiple domains 3	0	10	0.632291
CLDND1	claudin domain containing 1	0	7	0.631834
KLHL2	kelch-like family member 2	0	7	0.631834
SLC30A3	solute carrier family 30 (zinc transporter), member 3	0	7	0.631834
D4S234E		0	8	0.630691
EGR2	early growth response 2	0	8	0.630691
SGMS1	sphingomyelin synthase 1	2	8	0.630691
C19ORF50		0	4	0.630688
DUSP8	dual specificity phosphatase 8	1	4	0.630688
MAP3K4	mitogen-activated protein kinase kinase kinase 4	2	4	0.630688
OSMR	oncostatin M receptor	2	4	0.630688
THSD3		0	4	0.630688
RAB38	RAB38, member RAS oncogene family	0	5	0.629096
ARID4A	AT rich interactive domain 4A (RBP1-like)	0	11	0.628521
IL10	interleukin 10	14	6	0.628039
MAP2K4	mitogen-activated protein kinase kinase 4	7	14	0.627288
FAM134A	family with sequence similarity 134, member A	0	7	0.627286
MARCKS	myristoylated alanine-rich protein kinase C substrate	1	8	0.626723
UBE3C	ubiquitin protein ligase E3C	1	9	0.626286
CEP170	centrosomal protein 170kDa	0	10	0.625936
JOSD1	Josephin domain containing 1	0	12	0.625412
ANKRD43		0	6	0.622807
AURKB	aurora kinase B	0	1	0.622807
BAI1	brain-specific angiogenesis inhibitor 1	1	4	0.622807
BRSK1	BR serine/threonine kinase 1	0	2	0.622807
C1ORF174	chromosome 1 open reading frame 174	0	4	0.622807
CCAR1	cell division cycle and apoptosis regulator 1	0	3	0.622807
CHD1	chromodomain helicase DNA binding protein 1	0	7	0.622807
CLPX	caseinolytic mitochondrial matrix peptidase chaperone subunit	0	2	0.622807
CPE	carboxypeptidase E	1	4	0.622807
DCUN1D5	DCN1, defective in cullin neddylation 1, domain containing 5	0	2	0.622807
DUSP4	dual specificity phosphatase 4	1	4	0.622807
EPHA3	EPH receptor A3	1	10	0.622807
LRRC4C	leucine rich repeat containing 4C	1	1	0.622807
MYC	v-myc avian myelocytomatosis viral oncogene homolog	14	2	0.622807
NME4	NME/NM23 nucleoside diphosphate kinase 4	3	3	0.622807
PDHB	pyruvate dehydrogenase (lipoamide) beta	6	1	0.622807
PDHX	pyruvate dehydrogenase complex, component X	4	4	0.622807
SNAPIN	SNAP-associated protein	0	4	0.622807
VGF	VGF nerve growth factor inducible	0	2	0.622807
ZEB1	zinc finger E-box binding homeobox 1	0	3	0.622807
ZNF318	zinc finger protein 318	0	6	0.622807
CALU	calumenin	0	13	0.62042
PAPOLA	poly(A) polymerase alpha	1	12	0.61766
WWP1	WW domain containing E3 ubiquitin protein ligase 1	2	6	0.617658
UBE2J1	ubiquitin-conjugating enzyme E2, J1	3	15	0.61664
IQGAP2	IQ motif containing GTPase activating protein 2	1	5	0.616639
TBC1D10B	TBC1 domain family, member 10B	0	5	0.616639
CNOT7	CCR4-NOT transcription complex, subunit 7	1	9	0.615963
C22ORF28		0	4	0.615115
CCNE1	cyclin E1	6	4	0.615115
ABL2	c-abl oncogene 2, non-receptor tyrosine kinase	2	15	0.614612
CTNND2	catenin (cadherin-associated protein), delta 2	0	10	0.613604
SMAD7	SMAD family member 7	2	9	0.612598
DLGAP3	discs, large (Drosophila) homolog-associated protein 3	0	3	0.612597
FOS	FBJ murine osteosarcoma viral oncogene homolog	8	6	0.612597
MECP2	methyl CpG binding protein 2 (Rett syndrome)	0	26	0.612211
TWF1	twinfilin actin-binding protein 1	0	11	0.611685
C11ORF30	chromosome 11 open reading frame 30	0	10	0.610595
CREB1	cAMP responsive element binding protein 1	5	10	0.610595
PSME3	proteasome (prosome, macropain) activator subunit 3 (PA28 gamma; Ki)	3	10	0.610595
CCDC120	coiled-coil domain containing 120	0	7	0.609743
TMCC1	transmembrane and coiled-coil domain family 1	0	16	0.609475
EPHB2	EPH receptor B2	1	9	0.609268
AFF4	AF4/FMR2 family, member 4	0	20	0.609103
EIF2S2	eukaryotic translation initiation factor 2, subunit 2 beta, 38kDa	1	6	0.607618
FAM40A		0	6	0.607618
CREB3	cAMP responsive element binding protein 3	4	2	0.607616
CUL1	cullin 1	7	4	0.607616
HCN2	hyperpolarization activated cyclic nucleotide-gated potassium channel 2	0	2	0.607616
ID1	inhibitor of DNA binding 1, dominant negative helix-loop-helix protein	1	2	0.607616
KLRAQ1		0	4	0.607616
REPS1	RALBP1 associated Eps domain containing 1	0	2	0.607616
RPS6KA6	ribosomal protein S6 kinase, 90kDa, polypeptide 6	6	2	0.607616
SCAMP3	secretory carrier membrane protein 3	0	2	0.607616
SFMBT1	Scm-like with four mbt domains 1	0	4	0.607616
SLC39A6	solute carrier family 39 (zinc transporter), member 6	0	2	0.607616
WASF1	WAS protein family, member 1	5	4	0.607616
ZNF804A	zinc finger protein 804A	0	2	0.607616
CPEB2	cytoplasmic polyadenylation element binding protein 2	0	16	0.60577
DUSP5	dual specificity phosphatase 5	1	7	0.605507
MYH9	myosin, heavy chain 9, non-muscle	3	7	0.605507
NKX3-2	NK3 homeobox 2	0	5	0.604669
PDE3A	phosphodiesterase 3A, cGMP-inhibited	3	5	0.604669
TBX5	T-box 5	0	8	0.603935
KCNH7	potassium voltage-gated channel, subfamily H (eag-related), member 7	0	3	0.602717
PLCG1	phospholipase C, gamma 1	17	6	0.602716
USP45	ubiquitin specific peptidase 45	0	6	0.602716
RAD23B	RAD23 homolog B (S. cerevisiae)	2	13	0.60197
BCOR	BCL6 corepressor	0	7	0.601332
HABP4	hyaluronan binding protein 4	0	7	0.601332
SCN8A	sodium channel, voltage gated, type VIII, alpha subunit	0	7	0.601332
LAMA3	laminin, alpha 3	6	4	0.600298
PAXIP1	PAX interacting (with transcription-activation domain) protein 1	0	4	0.600298
PGR	progesterone receptor	2	4	0.600298
SLC38A7	solute carrier family 38, member 7	0	4	0.600298
TRPS1	trichorhinophalangeal syndrome I	0	20	0.600296
FOXO3	forkhead box O3	4	8	0.600295
TUSC2	tumor suppressor candidate 2	0	8	0.600295
RUNX1	runt-related transcription factor 1	3	17	0.599871
KIAA1033	KIAA1033	0	10	0.598852
KIF23	kinesin family member 23	0	5	0.598852
OSR1	odd-skipped related transciption factor 1	0	5	0.598852
SH3PXD2A	SH3 and PX domains 2A	0	20	0.598852
LASP1	LIM and SH3 protein 1	0	11	0.59833
FAM160B1	family with sequence similarity 160, member B1	0	12	0.597894
ATG16L1	autophagy related 16-like 1 (S. cerevisiae)	0	7	0.597212
LIN28B	lin-28 homolog B (C. elegans)	0	17	0.596491
SEMA4F	sema domain, immunoglobulin domain (Ig), transmembrane domain (TM) and short cytoplasmic domain, (semaphorin) 4F	1	10	0.595988
GNPDA2	glucosamine-6-phosphate deaminase 2	2	5	0.593151
ALDOA	aldolase A, fructose-bisphosphate	4	2	0.59315
ARL4A	ADP-ribosylation factor-like 4A	0	11	0.59315
CDKN1A	cyclin-dependent kinase inhibitor 1A (p21, Cip1)	10	9	0.59315
COL9A3	collagen, type IX, alpha 3	1	2	0.59315
LRP1B	low density lipoprotein receptor-related protein 1B	0	9	0.59315
NAPRT1	nicotinate phosphoribosyltransferase domain containing 1	0	2	0.59315
NFIL3	nuclear factor, interleukin 3 regulated	0	2	0.59315
NKX2-4	NK2 homeobox 4	0	2	0.59315
USP6	ubiquitin specific peptidase 6 (Tre-2 oncogene)	0	13	0.59315
WNT7A	wingless-type MMTV integration site family, member 7A	5	2	0.59315
ADCY3	adenylate cyclase 3	16	3	0.593149
ATP5G2	ATP synthase, H+ transporting, mitochondrial Fo complex, subunit C2 (subunit 9)	5	1	0.593149
B3GALT2	UDP-Gal:betaGlcNAc beta 1,3-galactosyltransferase, polypeptide 2	2	6	0.593149
CCDC135	coiled-coil domain containing 135	0	1	0.593149
CCNH	cyclin H	2	1	0.593149
LRIG3	leucine-rich repeats and immunoglobulin-like domains 3	0	3	0.593149
NKIRAS1	NFKB inhibitor interacting Ras-like 1	0	4	0.593149
ORAI1	ORAI calcium release-activated calcium modulator 1	0	4	0.593149
PLEKHJ1	pleckstrin homology domain containing, family J member 1	0	3	0.593149
SAFB	scaffold attachment factor B	0	1	0.593149
SLC4A3	solute carrier family 4 (anion exchanger), member 3	0	1	0.593149
WDFY3	WD repeat and FYVE domain containing 3	0	17	0.593149
ZFC3H1	zinc finger, C3H1-type containing	0	6	0.593149
ZFHX3	zinc finger homeobox 3	0	15	0.593149
ZNF524	zinc finger protein 524	0	1	0.593149
ZNF622	zinc finger protein 622	0	1	0.593149
GNS	glucosamine (N-acetyl)-6-sulfatase	3	12	0.590805
PBX3	pre-B-cell leukemia homeobox 3	0	10	0.590339
ATP8B1	ATPase, aminophospholipid transporter, class I, type 8B, member 1	0	7	0.589141
LIMK1	LIM domain kinase 1	3	7	0.589141
TBC1D9	TBC1 domain family, member 9 (with GRAM domain)	0	7	0.589141
SLC39A11	solute carrier family 39, member 11	0	6	0.58848
ITGB8	integrin, beta 8	7	18	0.588479
CNOT6	CCR4-NOT transcription complex, subunit 6	1	17	0.588207
MAGI3	membrane associated guanylate kinase, WW and PDZ domain containing 3	1	11	0.588058
LRRFIP2	leucine rich repeat (in FLII) interacting protein 2	0	5	0.587553
PAIP2	poly(A) binding protein interacting protein 2	0	5	0.587553
PTPRO	protein tyrosine phosphatase, receptor type, O	0	10	0.587553
TRPM6	transient receptor potential cation channel, subfamily M, member 6	0	9	0.586939
FTSJD1		0	4	0.586173
GRHL2	grainyhead-like 2 (Drosophila)	0	11	0.585546
RNF7	ring finger protein 7	1	7	0.585188
SYPL1	synaptophysin-like 1	0	7	0.585188
ITGB3	integrin, beta 3 (platelet glycoprotein IIIa, antigen CD61)	8	13	0.584584
CBFB	core-binding factor, beta subunit	0	12	0.583882
EXDL2		0	3	0.583882
PLEKHG6	pleckstrin homology domain containing, family G (with RhoGef domain) member 6	0	3	0.583882
RBM16		0	3	0.583882
SRRM2	serine/arginine repetitive matrix 2	0	3	0.583882
FAM19A1	family with sequence similarity 19 (chemokine (C-C motif)-like), member A1	0	6	0.583881
HEPHL1	hephaestin-like 1	0	6	0.583881
EPHA4	EPH receptor A4	1	14	0.58323
CHIC1	cysteine-rich hydrophobic domain 1	0	13	0.582482
CIC	capicua transcriptional repressor	0	5	0.582063
UBA3	ubiquitin-like modifier activating enzyme 3	1	5	0.582063
BCL2L11	BCL2-like 11 (apoptosis facilitator)	0	15	0.582062
BNIP2	BCL2/adenovirus E1B 19kDa interacting protein 2	0	7	0.581285
GALNT3	UDP-N-acetyl-alpha-D-galactosamine:polypeptide N-acetylgalactosaminyltransferase 3 (GalNAc-T3)	2	7	0.581285
NOTCH1	notch 1	3	7	0.581285
PTHLH	parathyroid hormone-like hormone	0	7	0.581285
GCC2	GRIP and coiled-coil domain containing 2	0	9	0.580856
SEMA3A	sema domain, immunoglobulin domain (Ig), short basic domain, secreted, (semaphorin) 3A	1	11	0.580583
FAM116A		0	13	0.580393
CDC23	cell division cycle 23	4	6	0.579356
FAM98A	family with sequence similarity 98, member A	0	6	0.579356
IGF2R	insulin-like growth factor 2 receptor	1	6	0.579356
MAPK9	mitogen-activated protein kinase 9	24	6	0.579356
SCN2A	sodium channel, voltage-gated, type II, alpha subunit	0	12	0.579356
ACTR1A	ARP1 actin-related protein 1 homolog A, centractin alpha (yeast)	0	10	0.579355
ELOVL3	ELOVL fatty acid elongase 3	0	2	0.579355
FNDC3A	fibronectin type III domain containing 3A	0	16	0.579355
RRAGB	Ras-related GTP binding B	0	2	0.579355
CHD4	chromodomain helicase DNA binding protein 4	0	4	0.579354
MAN2A1	mannosidase, alpha, class 2A, member 1	2	4	0.579354
TDG	thymine-DNA glycosylase	1	8	0.579354
MIB1	mindbomb E3 ubiquitin protein ligase 1	0	16	0.577677
ZBTB41	zinc finger and BTB domain containing 41	0	16	0.577677
ARID4B	AT rich interactive domain 4B (RBP1-like)	0	10	0.576674
CNN1	calponin 1, basic, smooth muscle	0	5	0.576672
WDR44	WD repeat domain 44	0	5	0.576672
KLF12	Kruppel-like factor 12	0	24	0.576006
RNF38	ring finger protein 38	0	16	0.576006
SSX2IP	synovial sarcoma, X breakpoint 2 interacting protein	1	11	0.575704
AQP11	aquaporin 11	0	3	0.574899
GALE	UDP-galactose-4-epimerase	3	3	0.574899
NEUROD1	neuronal differentiation 1	1	9	0.574899
VDAC2	voltage-dependent anion channel 2	3	3	0.574899
HNF1B	HNF1 homeobox B	1	6	0.574898
CPEB1	cytoplasmic polyadenylation element binding protein 1	3	10	0.574015
ZBTB10	zinc finger and BTB domain containing 10	0	7	0.573637
CCND1	cyclin D1	19	11	0.573295
BHLHB3		1	9	0.571966
SCML2	sex comb on midleg-like 2 (Drosophila)	0	9	0.571966
CPD	carboxypeptidase D	0	15	0.571383
DUSP10	dual specificity phosphatase 10	1	5	0.571383
KTELC1		0	10	0.571383
COL19A1	collagen, type XIX, alpha 1	0	16	0.571055
FOXG1	forkhead box G1	0	6	0.57051
SEH1L	SEH1-like (S. cerevisiae)	1	7	0.569889
CAPRIN2	caprin family member 2	0	8	0.569423
POU4F2	POU class 4 homeobox 2	0	8	0.569423
YOD1	YOD1 deubiquitinase	1	16	0.569423
TRIB2	tribbles pseudokinase 2	0	9	0.569062
ADIPOR2	adiponectin receptor 2	1	11	0.568537
ARHGEF3	Rho guanine nucleotide exchange factor (GEF) 3	0	11	0.568537
CAPZA1	capping protein (actin filament) muscle Z-line, alpha 1	0	9	0.566189
CSGALNACT1	chondroitin sulfate N-acetylgalactosaminyltransferase 1	2	7	0.566189
ELL2	elongation factor, RNA polymerase II, 2	0	9	0.566189
HECW1	HECT, C2 and WW domain containing E3 ubiquitin protein ligase 1	0	8	0.566189
RALGPS1	Ral GEF with PH domain and SH3 binding motif 1	0	19	0.566189
ZSWIM5	zinc finger, SWIM-type containing 5	0	9	0.566189
ADORA2B	adenosine A2b receptor	3	2	0.566188
CDH4	cadherin 4, type 1, R-cadherin (retinal)	1	1	0.566188
FBXW9	F-box and WD repeat domain containing 9	0	1	0.566188
GAP43	growth associated protein 43	0	3	0.566188
GPR137	G protein-coupled receptor 137	0	3	0.566188
IL29		2	1	0.566188
KIF18A	kinesin family member 18A	0	2	0.566188
MYL6	myosin, light chain 6, alkali, smooth muscle and non-muscle	1	1	0.566188
NR2F6	nuclear receptor subfamily 2, group F, member 6	0	2	0.566188
SCN3A	sodium channel, voltage-gated, type III, alpha subunit	0	12	0.566188
SH3GL3	SH3-domain GRB2-like 3	1	2	0.566188
SSTR3	somatostatin receptor 3	1	1	0.566188
TFAP2D	transcription factor AP-2 delta (activating enhancer binding protein 2 delta)	0	1	0.566188
UBE2NL	ubiquitin-conjugating enzyme E2N-like	1	3	0.566188
AP3S1	adaptor-related protein complex 3, sigma 1 subunit	1	4	0.566187
GBP1	guanylate binding protein 1, interferon-inducible	0	5	0.566187
RNF122	ring finger protein 122	0	5	0.566187
TASP1	taspase, threonine aspartase, 1	0	5	0.566187
TFDP1	transcription factor Dp-1	2	4	0.566187
DLC1	deleted in liver cancer 1	0	11	0.563857
CSNK1G1	casein kinase 1, gamma 1	1	20	0.563626
MAPRE1	microtubule-associated protein, RP/EB family, member 1	0	10	0.563626
INTS2	integrator complex subunit 2	0	9	0.563342
SLC25A27	solute carrier family 25, member 27	0	9	0.563342
ZBTB34	zinc finger and BTB domain containing 34	0	17	0.563177
ADAMTS5	ADAM metallopeptidase with thrombospondin type 1 motif, 5	0	16	0.562989
KCNMB2	potassium large conductance calcium-activated channel, subfamily M, beta member 2	1	7	0.562535
MKNK2	MAP kinase interacting serine/threonine kinase 2	2	7	0.562535
RRM2	ribonucleotide reductase M2	5	7	0.562535
IL1A	interleukin 1, alpha	8	6	0.561931
PPP1R15B	protein phosphatase 1, regulatory subunit 15B	0	11	0.561547
SLC16A14	solute carrier family 16, member 14	0	11	0.561547
C20ORF103		0	5	0.561087
PLAGL2	pleiomorphic adenoma gene-like 2	0	15	0.561087
RP5-1000E10.4		1	5	0.561087
AFAP1L2	actin filament associated protein 1-like 2	0	4	0.559827
COL13A1	collagen, type XIII, alpha 1	0	4	0.559827
DLGAP4	discs, large (Drosophila) homolog-associated protein 4	0	8	0.559827
FAM130A2		0	4	0.559827
FGD4	FYVE, RhoGEF and PH domain containing 4	0	4	0.559827
NFAT5	nuclear factor of activated T-cells 5, tonicity-responsive	6	23	0.559553
REEP3	receptor accessory protein 3	0	11	0.559256
RGS6	regulator of G-protein signaling 6	0	7	0.55893
RNF145	ring finger protein 145	0	7	0.55893
UNKL	unkempt family zinc finger-like	0	7	0.55893
CLCN3	chloride channel, voltage-sensitive 3	0	6	0.557739
KCNN3	potassium intermediate/small conductance calcium-activated channel, subfamily N, member 3	0	3	0.557738
SEMA3B	sema domain, immunoglobulin domain (Ig), short basic domain, secreted, (semaphorin) 3B	1	3	0.557738
UBE2E3	ubiquitin-conjugating enzyme E2E 3	2	3	0.557738
MMD	monocyte to macrophage differentiation-associated	0	9	0.557737
RPS6KA2	ribosomal protein S6 kinase, 90kDa, polypeptide 2	6	9	0.557737
CHRD	chordin	1	5	0.556079
PAX9	paired box 9	0	5	0.556079
TMEM161B	transmembrane protein 161B	0	5	0.556079
C1ORF9		0	10	0.556078
ADAM19	ADAM metallopeptidase domain 19	0	12	0.555665
GSPT2	G1 to S phase transition 2	0	2	0.553606
PSMA1	proteasome (prosome, macropain) subunit, alpha type, 1	1	2	0.553606
SEC24A	SEC24 family member A	1	12	0.553606
CBX3	chromobox homolog 3	0	4	0.553604
GPR6	G protein-coupled receptor 6	0	4	0.553604
CDC42	cell division cycle 42	21	9	0.552244
C12ORF30		0	7	0.551855
NEFL	neurofilament, light polypeptide	1	7	0.551855
SLC4A4	solute carrier family 4 (sodium bicarbonate cotransporter), member 4	2	14	0.551855
MAP3K1	mitogen-activated protein kinase kinase kinase 1, E3 ubiquitin protein ligase	5	12	0.551564
EPHB4	EPH receptor B4	1	5	0.551156
IL2RA	interleukin 2 receptor, alpha	4	5	0.551156
NAP5		0	5	0.551156
PLXNA1	plexin A1	1	10	0.551156
SLITRK2	SLIT and NTRK-like family, member 2	0	5	0.551156
TUSC3	tumor suppressor candidate 3	3	5	0.551156
TIPARP	TCDD-inducible poly(ADP-ribose) polymerase	0	8	0.550547
SOBP	sine oculis binding protein homolog (Drosophila)	0	11	0.550272
COPS7B	COP9 signalosome subunit 7B	0	9	0.549536
EYA1	eyes absent homolog 1 (Drosophila)	0	9	0.549536
HNF4G	hepatocyte nuclear factor 4, gamma	1	9	0.549536
MAP3K8	mitogen-activated protein kinase kinase kinase 8	3	6	0.549536
CRCT1	cysteine-rich C-terminal 1	0	3	0.549535
RHOV	ras homolog family member V	0	3	0.549535
RTKN	rhotekin	0	3	0.549535
THRSP	thyroid hormone responsive	0	3	0.549535
ARL4C	ADP-ribosylation factor-like 4C	0	13	0.548915
PAK1	p21 protein (Cdc42/Rac)-activated kinase 1	11	7	0.548383
EMCN	endomucin	0	4	0.547523
FURIN	furin (paired basic amino acid cleaving enzyme)	0	8	0.547523
KLF9	Kruppel-like factor 9	0	12	0.547523
RBM26	RNA binding motif protein 26	0	4	0.547523
RRAS2	related RAS viral (r-ras) oncogene homolog 2	3	4	0.547523
SRPK2	SRSF protein kinase 2	0	8	0.547523
WFS1	Wolfram syndrome 1 (wolframin)	1	4	0.547523
RCOR1	REST corepressor 1	1	13	0.547061
FBXO33	F-box protein 33	0	9	0.546856
PPP2R3A	protein phosphatase 2, regulatory subunit B'', alpha	0	9	0.546856
EIF2C1		0	18	0.546855
EIF3A	eukaryotic translation initiation factor 3, subunit A	1	5	0.546323
KIAA1949		0	5	0.546323
SUPT3H	suppressor of Ty 3 homolog (S. cerevisiae)	0	5	0.546323
HLF	hepatic leukemia factor	0	15	0.546322
MIDN	midnolin	0	6	0.545524
SC4MOL		2	6	0.545524
TIA1	TIA1 cytotoxic granule-associated RNA binding protein	0	6	0.545524
EDC3	enhancer of mRNA decapping 3	1	7	0.544956
BMI1	BMI1 polycomb ring finger oncogene	0	8	0.544532
CBX2	chromobox homolog 2	0	8	0.544532
PTPDC1	protein tyrosine phosphatase domain containing 1	0	8	0.544532
NRP2	neuropilin 2	0	16	0.544531
CCNJL	cyclin J-like	0	10	0.543937
MAP1B	microtubule-associated protein 1B	0	11	0.54372
SPRY2	sprouty homolog 2 (Drosophila)	1	4	0.541573
CABP1	calcium binding protein 1	0	2	0.541572
CARD11	caspase recruitment domain family, member 11	2	2	0.541572
COL16A1	collagen, type XVI, alpha 1	0	2	0.541572
CUEDC1	CUE domain containing 1	0	2	0.541572
ORC2L		0	6	0.541572
RNASEN		0	2	0.541572
SFRS9		1	2	0.541572
USP2	ubiquitin specific peptidase 2	0	2	0.541572
APOO	apolipoprotein O	0	1	0.541571
ARRDC4	arrestin domain containing 4	0	10	0.541571
ATP1A3	ATPase, Na+/K+ transporting, alpha 3 polypeptide	8	1	0.541571
B3GALT4	UDP-Gal:betaGlcNAc beta 1,3-galactosyltransferase, polypeptide 4	2	1	0.541571
BEGAIN	brain-enriched guanylate kinase-associated	0	3	0.541571
BRF2	BRF2, RNA polymerase III transcription initiation factor 50 kDa subunit	0	3	0.541571
CDK8	cyclin-dependent kinase 8	0	3	0.541571
FAM78B	family with sequence similarity 78, member B	0	1	0.541571
FBXL20	F-box and leucine-rich repeat protein 20	0	5	0.541571
GAN	gigaxonin	0	11	0.541571
JDP2	Jun dimerization protein 2	0	5	0.541571
LGR4	leucine-rich repeat containing G protein-coupled receptor 4	1	8	0.541571
MMP11	matrix metallopeptidase 11 (stromelysin 3)	0	5	0.541571
MYNN	myoneurin	0	8	0.541571
NDUFC1	NADH dehydrogenase (ubiquinone) 1, subcomplex unknown, 1, 6kDa	5	1	0.541571
PLK1	polo-like kinase 1	3	1	0.541571
SDC2	syndecan 2	3	11	0.541571
SLC27A4	solute carrier family 27 (fatty acid transporter), member 4	1	3	0.541571
SMARCAD1	SWI/SNF-related, matrix-associated actin-dependent regulator of chromatin, subfamily a, containing DEAD/H box 1	0	8	0.541571
SSH1	slingshot protein phosphatase 1	1	3	0.541571
TOPBP1	topoisomerase (DNA) II binding protein 1	0	3	0.541571
VAV1	vav 1 guanine nucleotide exchange factor	9	1	0.541571
ZSCAN21	zinc finger and SCAN domain containing 21	0	1	0.541571
ZFPM2	zinc finger protein, FOG family member 2	0	7	0.54157
RSBN1	round spermatid basic protein 1	0	14	0.539894
CLOCK	clock circadian regulator	1	11	0.53944
NECAP1	NECAP endocytosis associated 1	0	9	0.538967
LRIG1	leucine-rich repeats and immunoglobulin-like domains 1	0	7	0.538228
EFNA3	ephrin-A3	1	6	0.537674
EBF3	early B-cell factor 3	0	11	0.537324
HOXB5	homeobox B5	0	5	0.536904
ACVR2B	activin A receptor, type IIB	2	20	0.536903
C5ORF13		0	10	0.536902
CA7	carbonic anhydrase VII	1	4	0.535748
CCNJ	cyclin J	0	12	0.535748
CDC27	cell division cycle 27	4	4	0.535748
PRR15	proline rich 15	0	4	0.535748
VIM	vimentin	0	4	0.535748
WDR47	WD repeat domain 47	0	8	0.535748
ANKRD52	ankyrin repeat domain 52	0	11	0.535225
ESCO1	establishment of sister chromatid cohesion N-acetyltransferase 1	0	6	0.533835
UBE2O	ubiquitin-conjugating enzyme E2O	1	6	0.533835
RNF138	ring finger protein 138, E3 ubiquitin protein ligase	0	10	0.532314
SLC24A3	solute carrier family 24 (sodium/potassium/calcium exchanger), member 3	0	10	0.532314
SNN	stannin	0	10	0.532314
ARL4D	ADP-ribosylation factor-like 4D	0	5	0.532313
CCDC43	coiled-coil domain containing 43	0	5	0.532313
CYP24A1	cytochrome P450, family 24, subfamily A, polypeptide 1	0	5	0.532313
TRPM7	transient receptor potential cation channel, subfamily M, member 7	0	5	0.532313
MKL2	MKL/myocardin-like 2	0	17	0.532047
ARL15	ADP-ribosylation factor-like 15	0	7	0.531664
FAM135A	family with sequence similarity 135, member A	0	7	0.531664
ZBTB7A	zinc finger and BTB domain containing 7A	0	9	0.531305
MED8	mediator complex subunit 8	0	4	0.53005
SEPT7	septin 7	0	4	0.53005
SLC35A4	solute carrier family 35, member A4	0	4	0.53005
RYBP	RING1 and YY1 binding protein	0	14	0.530049
BCHE	butyrylcholinesterase	0	2	0.530048
FST	follistatin	1	2	0.530048
NGFRAP1	nerve growth factor receptor (TNFRSF16) associated protein 1	1	2	0.530048
RAB20	RAB20, member RAS oncogene family	0	2	0.530048
VPS33B	vacuolar protein sorting 33 homolog B (yeast)	0	2	0.530048
USP3	ubiquitin specific peptidase 3	0	6	0.530047
QKI	QKI, KH domain containing, RNA binding	0	20	0.528923
FBXL19	F-box and leucine-rich repeat protein 19	0	7	0.528443
MSI2	musashi RNA-binding protein 2	0	7	0.528443
RORC	RAR-related orphan receptor C	1	7	0.528443
TMUB2	transmembrane and ubiquitin-like domain containing 2	0	7	0.528443
CIT	citron (rho-interacting, serine/threonine kinase 21)	0	12	0.528175
C8ORF58	chromosome 8 open reading frame 58	0	5	0.527803
IL13	interleukin 13	4	5	0.527803
RNF20	ring finger protein 20, E3 ubiquitin protein ligase	0	5	0.527803
LSM11	LSM11, U7 small nuclear RNA associated	0	8	0.527244
CTDSPL	CTD (carboxy-terminal domain, RNA polymerase II, polypeptide A) small phosphatase-like	0	14	0.526846
MARCH5	membrane-associated ring finger (C3HC4) 5	0	12	0.526316
RASA1	RAS p21 protein activator (GTPase activating protein) 1	2	6	0.526316
STARD3NL	STARD3 N-terminal like	0	3	0.526316
DAGLA	diacylglycerol lipase, alpha	0	10	0.525575
ZBTB44	zinc finger and BTB domain containing 44	0	10	0.525575
CASP7	caspase 7, apoptosis-related cysteine peptidase	2	7	0.525259
MEX3B	mex-3 RNA binding family member B	0	7	0.525259
PITPNM2	phosphatidylinositol transfer protein, membrane-associated 2	0	11	0.524971
SLC38A2	solute carrier family 38, member 2	1	11	0.524971
MAP4K4	mitogen-activated protein kinase kinase kinase kinase 4	1	12	0.52447
NEGR1	neuronal growth regulator 1	1	12	0.52447
AKAP10	A kinase (PRKA) anchor protein 10	0	4	0.524468
NFIB	nuclear factor I/B	0	19	0.523599
EDNRB	endothelin receptor type B	3	10	0.523368
MBNL3	muscleblind-like splicing regulator 3	0	5	0.523366
PTAR1	protein prenyltransferase alpha subunit repeat containing 1	0	5	0.523366
STX1A	syntaxin 1A (brain)	1	5	0.523366
GTF2H1	general transcription factor IIH, polypeptide 1, 62kDa	2	6	0.522636
SERPINE1	serpin peptidase inhibitor, clade E (nexin, plasminogen activator inhibitor type 1), member 1	3	6	0.522636
TMEM25	transmembrane protein 25	0	7	0.522114
EDEM3	ER degradation enhancer, mannosidase alpha-like 3	1	14	0.522113
PLCXD3	phosphatidylinositol-specific phospholipase C, X domain containing 3	0	16	0.521723
CACNA1D	calcium channel, voltage-dependent, L type, alpha 1D subunit	11	3	0.519008
CNIH2	cornichon family AMPA receptor auxiliary protein 2	0	3	0.519008
GRK5	G protein-coupled receptor kinase 5	2	3	0.519008
MEPCE	methylphosphate capping enzyme	0	3	0.519008
RGS1	regulator of G-protein signaling 1	0	3	0.519008
COL25A1	collagen, type XXV, alpha 1	0	4	0.519007
LRIG2	leucine-rich repeats and immunoglobulin-like domains 2	0	4	0.519007
MYH11	myosin, heavy chain 11, smooth muscle	3	4	0.519007
TSPAN33	tetraspanin 33	0	4	0.519007
BTG2	BTG family, member 2	0	10	0.519006
CACHD1	cache domain containing 1	0	6	0.519006
GIGYF2	GRB10 interacting GYF protein 2	0	11	0.519006
GPR172A		0	1	0.519006
NEUROG2	neurogenin 2	0	6	0.519006
PARD6B	par-6 family cell polarity regulator beta	2	10	0.519006
SAMD8	sterile alpha motif domain containing 8	0	2	0.519006
SMARCA4	SWI/SNF related, matrix associated, actin dependent regulator of chromatin, subfamily a, member 4	0	2	0.519006
SPESP1	sperm equatorial segment protein 1	0	1	0.519006
SPI1	spleen focus forming virus (SFFV) proviral integration oncogene	2	1	0.519006
TMEM132A	transmembrane protein 132A	0	1	0.519006
TMEM33	transmembrane protein 33	0	6	0.519006
TNP1	transition protein 1 (during histone to protamine replacement)	0	1	0.519006
UBFD1	ubiquitin family domain containing 1	0	15	0.519006
VWF	von Willebrand factor	3	1	0.519006
ZFYVE19	zinc finger, FYVE domain containing 19	0	2	0.519006
USP37	ubiquitin specific peptidase 37	0	13	0.517348
DPYSL2	dihydropyrimidinase-like 2	1	11	0.517048
A2BP1		0	9	0.516614
PIP5K1B	phosphatidylinositol-4-phosphate 5-kinase, type I, beta	6	9	0.516614
TSC22D2	TSC22 domain family, member 2	0	9	0.516614
ABHD2	abhydrolase domain containing 2	0	17	0.516474
ELAVL3	ELAV like neuron-specific RNA binding protein 3	0	8	0.516317
PPP2R5E	protein phosphatase 2, regulatory subunit B', epsilon isoform	2	8	0.516317
RPS6KA5	ribosomal protein S6 kinase, 90kDa, polypeptide 5	3	7	0.515935
IKZF4	IKAROS family zinc finger 4 (Eos)	0	13	0.5157
PCDHA13	protocadherin alpha 13	0	13	0.5157
CD69	CD69 molecule	0	6	0.515427
PPP4R4	protein phosphatase 4, regulatory subunit 4	0	6	0.515427
ZNF148	zinc finger protein 148	0	12	0.515426
COL12A1	collagen, type XII, alpha 1	1	10	0.514717
CABLES1	Cdk5 and Abl enzyme substrate 1	0	5	0.514715
CUL2	cullin 2	3	5	0.514715
HOXA9	homeobox A9	0	5	0.514715
KCTD8	potassium channel tetramerization domain containing 8	0	5	0.514715
BCL2L2	BCL2-like 2	0	14	0.514413
ATP1A2	ATPase, Na+/K+ transporting, alpha 2 polypeptide	8	9	0.514245
C2ORF69	chromosome 2 open reading frame 69	0	8	0.513656
KLHL24	kelch-like family member 24	0	12	0.513655
C4ORF19	chromosome 4 open reading frame 19	0	4	0.513654
LOC653319		0	4	0.513654
SNX18	sorting nexin 18	0	4	0.513654
STAB2	stabilin 2	0	4	0.513654
DAZAP2	DAZ associated protein 2	0	7	0.512899
DYNLT3	dynein, light chain, Tctex-type 3	0	7	0.512899
FRMD4B	FERM domain containing 4B	0	7	0.512899
RNF44	ring finger protein 44	0	10	0.512598
CDC25A	cell division cycle 25A	2	9	0.511896
NUP210	nucleoporin 210kDa	1	6	0.511896
PLXND1	plexin D1	0	6	0.511896
SLC6A1	solute carrier family 6 (neurotransmitter transporter), member 1	0	9	0.511896
SURF4	surfeit 4	0	6	0.511896
ZNF830	zinc finger protein 830	0	3	0.511896
FAM81A	family with sequence similarity 81, member A	0	8	0.511021
EPB41	erythrocyte membrane protein band 4.1 (elliptocytosis 1, RH-linked)	1	13	0.510819
SLC35F1	solute carrier family 35, member F1	0	13	0.510819
BRWD1	bromodomain and WD repeat domain containing 1	0	18	0.51073
GTF2I	general transcription factor IIi	1	5	0.510498
YWHAZ	tyrosine 3-monooxygenase/tryptophan 5-monooxygenase activation protein, zeta polypeptide	4	10	0.510498
KLHL28	kelch-like family member 28	0	12	0.510149
WNK1	WNK lysine deficient protein kinase 1	0	7	0.509901
ZHX1	zinc fingers and homeoboxes 1	0	7	0.509901
BCL9	B-cell CLL/lymphoma 9	0	6	0.508415
BECN1	beclin 1, autophagy related	1	4	0.508415
GPR110	G protein-coupled receptor 110	0	4	0.508415
HIF1A	hypoxia inducible factor 1, alpha subunit (basic helix-loop-helix transcription factor)	3	6	0.508415
MEOX2	mesenchyme homeobox 2	0	6	0.508415
PDS5A	PDS5, regulator of cohesion maintenance, homolog A (S. cerevisiae)	0	10	0.508415
SFRS7		1	6	0.508415
TGIF1	TGFB-induced factor homeobox 1	0	4	0.508415
UPF3A	UPF3 regulator of nonsense transcripts homolog A (yeast)	1	4	0.508415
DSP	desmoplakin	1	2	0.508414
GCA	grancalcin, EF-hand calcium binding protein	0	2	0.508414
MAP3K2	mitogen-activated protein kinase kinase kinase 2	3	11	0.507472
DNMT3A	DNA (cytosine-5-)-methyltransferase 3 alpha	2	9	0.507263
STC1	stanniocalcin 1	0	14	0.506936
PCDH10	protocadherin 10	0	7	0.506935
PHF13	PHD finger protein 13	0	7	0.506935
TMED5	transmembrane emp24 protein transport domain containing 5	0	7	0.506935
ZBTB39	zinc finger and BTB domain containing 39	0	12	0.50669
BAK1	BCL2-antagonist/killer 1	1	5	0.506348
RAB12	RAB12, member RAS oncogene family	0	5	0.506348
SAR1B	SAR1 homolog B (S. cerevisiae)	1	5	0.506348
SNAI2	snail family zinc finger 2	1	5	0.506348
TNFRSF21	tumor necrosis factor receptor superfamily, member 21	1	5	0.506348
ZHX2	zinc fingers and homeoboxes 2	0	5	0.506348
MTMR4	myotubularin related protein 4	0	11	0.5056
ZNF280B	zinc finger protein 280B	0	11	0.5056
PGM2L1	phosphoglucomutase 2-like 1	1	17	0.50538
APBB3	amyloid beta (A4) precursor protein-binding, family B, member 3	0	3	0.50498
GOLGA8B	golgin A8 family, member B	0	12	0.504979
PCDHAC1	protocadherin alpha subfamily C, 1	0	12	0.504979
NPEPPS	aminopeptidase puromycin sensitive	0	6	0.504978
RAD9B	RAD9 homolog B (S. pombe)	0	6	0.504978
BSN	bassoon presynaptic cytomatrix protein	0	13	0.504454
SULF1	sulfatase 1	0	10	0.504298
CASP3	caspase 3, apoptosis-related cysteine peptidase	14	7	0.504006
HBP1	HMG-box transcription factor 1	0	7	0.504006
HOOK3	hook microtubule-tethering protein 3	0	7	0.504006
KIAA1598	KIAA1598	0	7	0.504006
PICALM	phosphatidylinositol binding clathrin assembly protein	0	7	0.504006
USP33	ubiquitin specific peptidase 33	0	7	0.504006
NAV2	neuron navigator 2	0	12	0.503278
COL3A1	collagen, type III, alpha 1	4	4	0.503277
PPP1R1A	protein phosphatase 1, regulatory (inhibitor) subunit 1A	1	4	0.503277
VSX1	visual system homeobox 1	0	4	0.503277
GIT1	G protein-coupled receptor kinase interacting ArfGAP 1	3	5	0.502263
HOXB4	homeobox B4	0	5	0.502263
OSBPL5	oxysterol binding protein-like 5	0	5	0.502263
UBE2V2	ubiquitin-conjugating enzyme E2 variant 2	0	5	0.502263
GABBR2	gamma-aminobutyric acid (GABA) B receptor, 2	1	11	0.501896
NEUROD2	neuronal differentiation 2	0	6	0.50159
REEP1	receptor accessory protein 1	0	12	0.50159
TRIM37	tripartite motif containing 37	1	6	0.50159
UNC5A	unc-5 homolog A (C. elegans)	1	6	0.50159
USP32	ubiquitin specific peptidase 32	0	6	0.50159
PTGDR	prostaglandin D2 receptor (DP)	1	7	0.50111
E2F3	E2F transcription factor 3	10	14	0.501109
SLC16A9	solute carrier family 16, member 9	0	8	0.500749
SYNE1	spectrin repeat containing, nuclear envelope 1	0	8	0.500749
HEXIM1	hexamethylene bis-acetamide inducible 1	0	10	0.500247
NARG1		0	10	0.500247
NR4A2	nuclear receptor subfamily 4, group A, member 2	0	10	0.500247
PTEN	phosphatase and tensin homolog	11	10	0.500247
RAB10	RAB10, member RAS oncogene family	0	10	0.500247
TMEM30A	transmembrane protein 30A	0	11	0.500065
PPARGC1A	peroxisome proliferator-activated receptor gamma, coactivator 1 alpha	3	14	0.499674
ACVR1C	activin A receptor, type IC	1	5	0.498247
ADAMTS9	ADAM metallopeptidase with thrombospondin type 1 motif, 9	0	5	0.498247
FAM133B	family with sequence similarity 133, member B	0	5	0.498247
NUP153	nucleoporin 153kDa	1	5	0.498247
PAPD4	PAP associated domain containing 4	0	5	0.498247
SOLH		0	5	0.498247
APCDD1	adenomatosis polyposis coli down-regulated 1	0	4	0.498246
DNAJC5B	DnaJ (Hsp40) homolog, subfamily C, member 5 beta	1	2	0.498246
GPBP1	GC-rich promoter binding protein 1	0	2	0.498246
KLF11	Kruppel-like factor 11	0	8	0.498246
PHF16		0	8	0.498246
PPM1G	protein phosphatase, Mg2+/Mn2+ dependent, 1G	0	2	0.498246
PRKRA	protein kinase, interferon-inducible double stranded RNA dependent activator	0	4	0.498246
RBL1	retinoblastoma-like 1 (p107)	2	4	0.498246
SH2D2A	SH2 domain containing 2A	1	2	0.498246
VASP	vasodilator-stimulated phosphoprotein	3	4	0.498246
ZNF294		0	8	0.498246
CDC123	cell division cycle 123	0	1	0.498245
CDX2	caudal type homeobox 2	0	3	0.498245
FBXO32	F-box protein 32	0	1	0.498245
MYLIP	myosin regulatory light chain interacting protein	0	6	0.498245
PHIP	pleckstrin homology domain interacting protein	0	1	0.498245
PLXNC1	plexin C1	1	1	0.498245
PPP1R14C	protein phosphatase 1, regulatory (inhibitor) subunit 14C	0	7	0.498245
RGL1	ral guanine nucleotide dissociation stimulator-like 1	0	10	0.498245
SERP1	stress-associated endoplasmic reticulum protein 1	0	10	0.498245
TAOK1	TAO kinase 1	1	7	0.498245
TRIP4	thyroid hormone receptor interactor 4	0	1	0.498245
PHC2	polyhomeotic homolog 2 (Drosophila)	0	8	0.495766
USP9X	ubiquitin specific peptidase 9, X-linked	0	13	0.495199
APP	amyloid beta (A4) precursor protein	1	6	0.494946
SUMF1	sulfatase modifying factor 1	1	6	0.494946
DDAH1	dimethylarginine dimethylaminohydrolase 1	0	10	0.494291
TAOK2	TAO kinase 2	1	5	0.494291
TMEM100	transmembrane protein 100	0	5	0.494291
ZBTB9	zinc finger and BTB domain containing 9	0	5	0.494291
PDGFRA	platelet-derived growth factor receptor, alpha polypeptide	11	14	0.494011
EHF	ets homologous factor	0	9	0.493856
FCHO2	FCH domain only 2	0	9	0.493856
ZCCHC2	zinc finger, CCHC domain containing 2	0	9	0.493856
CNTN4	contactin 4	0	8	0.493313
SESN2	sestrin 2	1	8	0.493313
C19ORF2		0	4	0.493311
C1ORF135		0	4	0.493311
ENPEP	glutamyl aminopeptidase (aminopeptidase A)	1	4	0.493311
GALR1	galanin receptor 1	1	4	0.493311
IHPK3		0	4	0.493311
MXRA5	matrix-remodelling associated 5	0	4	0.493311
SLC20A1	solute carrier family 20 (phosphate transporter), member 1	0	4	0.493311
ZBTB5	zinc finger and BTB domain containing 5	0	10	0.492338
FOXN3	forkhead box N3	0	15	0.49169
ERO1L	ERO1-like (S. cerevisiae)	2	6	0.491689
KAT2B	K(lysine) acetyltransferase 2B	1	9	0.491689
KITLG	KIT ligand	4	9	0.491689
SPAST	spastin	0	9	0.491689
UNK	unkempt family zinc finger	0	6	0.491689
PTGFRN	prostaglandin F2 receptor inhibitor	0	11	0.491102
CRK	v-crk avian sarcoma virus CT10 oncogene homolog	13	8	0.490883
SNF1LK		0	8	0.490883
ASF1A	anti-silencing function 1A histone chaperone	0	5	0.4904
GNAO1	guanine nucleotide binding protein (G protein), alpha activating activity polypeptide O	4	5	0.4904
USP38	ubiquitin specific peptidase 38	0	5	0.4904
LPGAT1	lysophosphatidylglycerol acyltransferase 1	1	12	0.490078
ELMO1	engulfment and cell motility 1	3	7	0.489849
MAP7	microtubule-associated protein 7	0	7	0.489849
DICER1	dicer 1, ribonuclease type III	0	11	0.489349
GRB10	growth factor receptor-bound protein 10	0	11	0.489349
TNPO1	transportin 1	0	13	0.489214
ACVR1B	activin A receptor, type IB	1	10	0.488476
ATAD2B	ATPase family, AAA domain containing 2B	0	12	0.488476
B3GAT3	beta-1,3-glucuronyltransferase 3 (glucuronosyltransferase I)	3	4	0.488476
CRY2	cryptochrome 2 (photolyase-like)	1	8	0.488476
FAHD1	fumarylacetoacetate hydrolase domain containing 1	0	4	0.488476
FNBP4	formin binding protein 4	0	4	0.488476
FOXA1	forkhead box A1	0	6	0.488476
GRM7	glutamate receptor, metabotropic 7	1	6	0.488476
HOXA11	homeobox A11	0	6	0.488476
IMPDH1	IMP (inosine 5'-monophosphate) dehydrogenase 1	3	4	0.488476
RASL11B	RAS-like, family 11, member B	0	4	0.488476
TADA1L		0	2	0.488476
AKT3	v-akt murine thymoma viral oncogene homolog 3	34	13	0.48774
EFNB2	ephrin-B2	1	13	0.48774
BNC2	basonuclin 2	0	20	0.48752
MBNL2	muscleblind-like splicing regulator 2	0	14	0.487112
MED12L	mediator complex subunit 12-like	0	7	0.487111
NUMBL	numb homolog (Drosophila)-like	1	7	0.487111
PAM	peptidylglycine alpha-amidating monooxygenase	0	7	0.487111
KREMEN1	kringle containing transmembrane protein 1	0	12	0.486885
MXI1	MAX interactor 1, dimerization protein	0	10	0.486569
TSGA14		0	10	0.486569
CNOT1	CCR4-NOT transcription complex, subunit 1	1	5	0.486567
DPF2	D4, zinc and double PHD fingers family 2	0	5	0.486567
GAS2	growth arrest-specific 2	0	5	0.486567
STAC	SH3 and cysteine rich domain	0	8	0.486094
GPR85	G protein-coupled receptor 85	0	11	0.485878
PHF15		0	14	0.485755
ANKRD17	ankyrin repeat domain 17	0	6	0.485305
FAT2	FAT atypical cadherin 2	0	6	0.485305
RPS6KA3	ribosomal protein S6 kinase, 90kDa, polypeptide 3	6	15	0.485305
SSH2	slingshot protein phosphatase 2	1	15	0.485305
PPM1E	protein phosphatase, Mg2+/Mn2+ dependent, 1E	0	12	0.485304
SLC22A23	solute carrier family 22, member 23	0	9	0.485304
C1QL3	complement component 1, q subcomponent-like 3	0	3	0.485303
ZFP36	ZFP36 ring finger protein	0	3	0.485303
BCL2	B-cell CLL/lymphoma 2	10	16	0.484911
M6PR	mannose-6-phosphate receptor (cation dependent)	2	7	0.484406
PCDH20	protocadherin 20	0	7	0.484406
SGK3	serum/glucocorticoid regulated kinase family, member 3	0	7	0.484406
BCL11B	B-cell CLL/lymphoma 11B (zinc finger protein)	0	15	0.484047
COL4A2	collagen, type IV, alpha 2	6	4	0.483735
WNT1	wingless-type MMTV integration site family, member 1	5	4	0.483735
ZNF281	zinc finger protein 281	0	4	0.483735
GPR137C	G protein-coupled receptor 137C	0	8	0.483733
KPNA4	karyopherin alpha 4 (importin alpha 3)	0	8	0.483733
CD2AP	CD2-associated protein	1	9	0.483212
PDGFA	platelet-derived growth factor alpha polypeptide	9	5	0.482797
PPP1CC	protein phosphatase 1, catalytic subunit, gamma isozyme	6	5	0.482797
CLCF1	cardiotrophin-like cytokine factor 1	2	6	0.482173
DLG5	discs, large homolog 5 (Drosophila)	0	6	0.482173
INPP5A	inositol polyphosphate-5-phosphatase, 40kDa	3	6	0.482173
ARMC8	armadillo repeat containing 8	0	10	0.480932
ARHGEF1	Rho guanine nucleotide exchange factor (GEF) 1	2	1	0.479083
CCK	cholecystokinin	2	1	0.479083
ENO1	enolase 1, (alpha)	3	1	0.479083
GPC4	glypican 4	0	6	0.479083
GSPT1	G1 to S phase transition 1	0	2	0.479083
LOC440093		0	3	0.479083
LOC90379		0	3	0.479083
MAPK12	mitogen-activated protein kinase 12	19	2	0.479083
PCNA	proliferating cell nuclear antigen	5	1	0.479083
PQLC2	PQ loop repeat containing 2	0	3	0.479083
RPN1	ribophorin I	3	2	0.479083
SNRPA1	small nuclear ribonucleoprotein polypeptide A'	1	1	0.479083
SRPX	sushi-repeat containing protein, X-linked	0	2	0.479083
ZNF579	zinc finger protein 579	0	1	0.479083
COL21A1	collagen, type XXI, alpha 1	0	4	0.479082
DNM2	dynamin 2	3	4	0.479082
ELK3	ELK3, ETS-domain protein (SRF accessory protein 2)	0	4	0.479082
ELL	elongation factor RNA polymerase II	0	7	0.479082
IL7	interleukin 7	3	4	0.479082
NKD1	naked cuticle homolog 1 (Drosophila)	1	4	0.479082
RASL10B	RAS-like, family 10, member B	0	8	0.479082
SH3BP5	SH3-domain binding protein 5 (BTK-associated)	0	4	0.479082
MAP2K1	mitogen-activated protein kinase kinase 1	37	5	0.479081
SNX33	sorting nexin 33	0	5	0.479081
TMED2	transmembrane emp24 domain trafficking protein 2	0	5	0.479081
WDR82	WD repeat domain 82	0	11	0.477413
USP46	ubiquitin specific peptidase 46	0	10	0.477246
HEG1	heart development protein with EGF-like domains 1	0	9	0.477044
ADAMTS3	ADAM metallopeptidase with thrombospondin type 1 motif, 3	0	7	0.476465
SLC17A7	solute carrier family 17 (vesicular glutamate transporter), member 7	0	6	0.47603
ARID2	AT rich interactive domain 2 (ARID, RFX-like)	0	10	0.475425
CDKN1B	cyclin-dependent kinase inhibitor 1B (p27, Kip1)	6	5	0.475425
PCDHA1	protocadherin alpha 1	0	9	0.475023
PCDHA3	protocadherin alpha 3	0	9	0.475023
PCDHA5	protocadherin alpha 5	0	9	0.475023
PCDHA7	protocadherin alpha 7	0	9	0.475023
PCDHA8	protocadherin alpha 8	0	9	0.475023
SENP1	SUMO1/sentrin specific peptidase 1	0	13	0.474867
CEP70	centrosomal protein 70kDa	0	4	0.474521
CXCL11	chemokine (C-X-C motif) ligand 11	3	4	0.474521
ETNK2	ethanolamine kinase 2	2	4	0.474521
PRLR	prolactin receptor	3	4	0.474521
UEVLD	UEV and lactate/malate dehyrogenase domains	0	4	0.474521
SLC1A2	solute carrier family 1 (glial high affinity glutamate transporter), member 2	1	20	0.474519
NRIP1	nuclear receptor interacting protein 1	0	11	0.474109
PCDHAC2	protocadherin alpha subfamily C, 2	0	11	0.474109
LCOR	ligand dependent nuclear receptor corepressor	0	10	0.473617
MAP4K3	mitogen-activated protein kinase kinase kinase kinase 3	1	6	0.473018
RBL2	retinoblastoma-like 2 (p130)	2	6	0.473018
STIM2	stromal interaction molecule 2	0	9	0.473018
TEAD3	TEA domain family member 3	0	6	0.473018
ADAMTS8	ADAM metallopeptidase with thrombospondin type 1 motif, 8	0	3	0.473016
BZW2	basic leucine zipper and W2 domains 2	0	3	0.473016
GHRHR	growth hormone releasing hormone receptor	1	3	0.473016
HSPA4L	heat shock 70kDa protein 4-like	1	3	0.473016
SYAP1	synapse associated protein 1	0	3	0.473016
MET	met proto-oncogene	11	8	0.472271
NR2F2	nuclear receptor subfamily 2, group F, member 2	0	8	0.472271
SAPS3		0	8	0.472271
BTBD7	BTB (POZ) domain containing 7	0	13	0.472098
EDN1	endothelin 1	4	5	0.471825
GAB1	GRB2-associated binding protein 1	4	5	0.471825
RARA	retinoic acid receptor, alpha	2	5	0.471825
CEP350	centrosomal protein 350kDa	0	12	0.471526
MAP3K7IP3		1	12	0.471526
PEX5L	peroxisomal biogenesis factor 5-like	0	7	0.471314
ABCG4	ATP-binding cassette, sub-family G (WHITE), member 4	1	9	0.471031
MIA3	melanoma inhibitory activity family, member 3	0	9	0.471031
MSL1	male-specific lethal 1 homolog (Drosophila)	0	9	0.471031
PIP4K2B	phosphatidylinositol-5-phosphate 4-kinase, type II, beta	3	9	0.471031
BCAR3	breast cancer anti-estrogen resistance 3	0	2	0.470043
MRPS14	mitochondrial ribosomal protein S14	0	2	0.470043
SNX25	sorting nexin 25	0	2	0.470043
TAF12	TAF12 RNA polymerase II, TATA box binding protein (TBP)-associated factor, 20kDa	1	2	0.470043
ZNF350	zinc finger protein 350	0	2	0.470043
ABHD6	abhydrolase domain containing 6	0	4	0.470042
BACE2	beta-site APP-cleaving enzyme 2	1	4	0.470042
C11ORF57	chromosome 11 open reading frame 57	0	8	0.470042
CADPS	Ca++-dependent secretion activator	0	4	0.470042
CHUK	conserved helix-loop-helix ubiquitous kinase	21	6	0.470042
GIPC1	GIPC PDZ domain containing family, member 1	0	4	0.470042
GTF3C2	general transcription factor IIIC, polypeptide 2, beta 110kDa	0	4	0.470042
MTSS1	metastasis suppressor 1	0	8	0.470042
PLEKHA3	pleckstrin homology domain containing, family A (phosphoinositide binding specific) member 3	0	6	0.470042
PPP2R1B	protein phosphatase 2, regulatory subunit A, beta	7	6	0.470042
RAB15	RAB15, member RAS oncogene family	0	8	0.470042
RAPGEFL1	Rap guanine nucleotide exchange factor (GEF)-like 1	0	8	0.470042
ABCA1	ATP-binding cassette, sub-family A (ABC1), member 1	1	11	0.469238
TMEM135	transmembrane protein 135	0	9	0.469059
EYA2	eyes absent homolog 2 (Drosophila)	0	5	0.468276
HIPK1	homeodomain interacting protein kinase 1	0	15	0.468276
HN1	hematological and neurological expressed 1	0	5	0.468276
STK33	serine/threonine kinase 33	0	5	0.468276
VPS26B	vacuolar protein sorting 26 homolog B (S. pombe)	0	5	0.468276
TACC1	transforming, acidic coiled-coil containing protein 1	0	13	0.468005
ITK	IL2-inducible T-cell kinase	3	8	0.467836
RNF165	ring finger protein 165	0	14	0.467523
CPSF6	cleavage and polyadenylation specific factor 6, 68kDa	0	6	0.467106
GALNT1	UDP-N-acetyl-alpha-D-galactosamine:polypeptide N-acetylgalactosaminyltransferase 1 (GalNAc-T1)	2	12	0.467106
KIAA1804	mixed lineage kinase 4	0	6	0.467106
METAP2	methionyl aminopeptidase 2	0	6	0.467106
PHF6	PHD finger protein 6	0	12	0.467106
TMEM132E	transmembrane protein 132E	0	3	0.467106
ACCN2		0	7	0.466273
SH3RF1	SH3 domain containing ring finger 1	0	7	0.466273
R3HDM1	R3H domain containing 1	0	4	0.465651
SAPS2		0	4	0.465651
SYNGR3	synaptogyrin 3	0	4	0.465651
TOPORS	topoisomerase I binding, arginine/serine-rich, E3 ubiquitin protein ligase	0	4	0.465651
ZBTB6	zinc finger and BTB domain containing 6	0	8	0.465651
DCX	doublecortin	0	18	0.465167
EIF5A2	eukaryotic translation initiation factor 5A2	0	14	0.465029
TMEM9B	TMEM9 domain family, member B	0	5	0.464782
RANBP10	RAN binding protein 10	0	12	0.464204
DENND1B	DENN/MADD domain containing 1B	0	7	0.463792
MEX3C	mex-3 RNA binding family member C	0	7	0.463792
SORCS3	sortilin-related VPS10 domain containing receptor 3	0	7	0.463792
PSD3	pleckstrin and Sec7 domain containing 3	1	17	0.463358
BDNF	brain-derived neurotrophic factor	3	10	0.463054
WDR37	WD repeat domain 37	0	12	0.462766
FAM96A	family with sequence similarity 96, member A	0	2	0.461339
FREQ		0	7	0.461339
GLUD2	glutamate dehydrogenase 2	6	2	0.461339
MAP1A	microtubule-associated protein 1A	0	6	0.461339
PARP16	poly (ADP-ribose) polymerase family, member 16	0	6	0.461339
ZDHHC9	zinc finger, DHHC-type containing 9	0	7	0.461339
ZNF217	zinc finger protein 217	0	6	0.461339
ACSL4	acyl-CoA synthetase long-chain family member 4	5	10	0.461338
ARHGEF11	Rho guanine nucleotide exchange factor (GEF) 11	1	5	0.461338
BCAT1	branched chain amino-acid transaminase 1, cytosolic	4	15	0.461338
C17ORF49	chromosome 17 open reading frame 49	0	1	0.461338
C1QB	complement component 1, q subcomponent, B chain	5	1	0.461338
CYP46A1	cytochrome P450, family 46, subfamily A, polypeptide 1	1	4	0.461338
FRZB	frizzled-related protein	0	4	0.461338
GSK3B	glycogen synthase kinase 3 beta	19	1	0.461338
HAND2	heart and neural crest derivatives expressed 2	0	4	0.461338
LBX1	ladybird homeobox 1	0	1	0.461338
LDHB	lactate dehydrogenase B	5	1	0.461338
NPM3	nucleophosmin/nucleoplasmin 3	0	1	0.461338
NUP35	nucleoporin 35kDa	1	4	0.461338
OAZ3	ornithine decarboxylase antizyme 3	0	1	0.461338
PRPF40A	PRP40 pre-mRNA processing factor 40 homolog A (S. cerevisiae)	1	4	0.461338
RNF123	ring finger protein 123	0	1	0.461338
SHKBP1	SH3KBP1 binding protein 1	0	1	0.461338
SIPA1	signal-induced proliferation-associated 1	1	1	0.461338
SPPL2A	signal peptide peptidase like 2A	0	1	0.461338
SULT2A1	sulfotransferase family, cytosolic, 2A, dehydroepiandrosterone (DHEA)-preferring, member 1	0	4	0.461338
SYN2	synapsin II	0	9	0.461338
TACSTD1		0	1	0.461338
TUBB2B	tubulin, beta 2B class IIb	3	1	0.461338
ZPBP2	zona pellucida binding protein 2	0	4	0.461338
DENND5A	DENN/MADD domain containing 5A	0	3	0.461337
DEXI	Dexi homolog (mouse)	0	3	0.461337
GEMIN7	gem (nuclear organelle) associated protein 7	1	3	0.461337
GGNBP2	gametogenetin binding protein 2	0	3	0.461337
NDST2	N-deacetylase/N-sulfotransferase (heparan glucosaminyl) 2	2	3	0.461337
ZNF710	zinc finger protein 710	0	3	0.461337
XRN1	5'-3' exoribonuclease 1	1	12	0.45992
ZFHX4	zinc finger homeobox 4	0	9	0.459448
B4GALT6	UDP-Gal:betaGlcNAc beta 1,4- galactosyltransferase, polypeptide 6	2	8	0.459212
IQSEC2	IQ motif and Sec7 domain 2	1	8	0.459212
BRMS1L	breast cancer metastasis-suppressor 1-like	0	6	0.458509
SEC23A	Sec23 homolog A (S. cerevisiae)	1	6	0.458509
ABT1	activator of basal transcription 1	0	5	0.457947
LIMA1	LIM domain and actin binding 1	0	5	0.457947
PIGA	phosphatidylinositol glycan anchor biosynthesis, class A	2	9	0.457573
FRK	fyn-related kinase	0	4	0.457106
PCMT1	protein-L-isoaspartate (D-aspartate) O-methyltransferase	0	4	0.457106
PKNOX2	PBX/knotted 1 homeobox 2	0	8	0.457106
PPIL4	peptidylprolyl isomerase (cyclophilin)-like 4	0	4	0.457106
SCN11A	sodium channel, voltage-gated, type XI, alpha subunit	0	4	0.457106
TUBGCP3	tubulin, gamma complex associated protein 3	0	4	0.457106
BTBD3	BTB (POZ) domain containing 3	0	11	0.456725
IGF2BP2	insulin-like growth factor 2 mRNA binding protein 2	0	7	0.456508
RAB11A	RAB11A, member RAS oncogene family	3	7	0.456508
SEMA6A	sema domain, transmembrane domain (TM), and cytoplasmic domain, (semaphorin) 6A	1	10	0.456269
VEZF1	vascular endothelial zinc finger 1	0	10	0.456269
ACLY	ATP citrate lyase	2	3	0.455712
BIN3	bridging integrator 3	0	3	0.455712
FBXL12	F-box and leucine-rich repeat protein 12	0	3	0.455712
KCNJ11	potassium inwardly-rectifying channel, subfamily J, member 11	1	3	0.455712
PPP2CB	protein phosphatase 2, catalytic subunit, beta isozyme	7	3	0.455712
ZDHHC17	zinc finger, DHHC-type containing 17	0	12	0.455712
ROD1		0	13	0.454859
COL1A1	collagen, type I, alpha 1	4	5	0.454603
ISL1	ISL LIM homeobox 1	0	5	0.454603
NFIA	nuclear factor I/A	0	5	0.454603
PTGER2	prostaglandin E receptor 2 (subtype EP2), 53kDa	1	5	0.454603
TIMM17A	translocase of inner mitochondrial membrane 17 homolog A (yeast)	0	5	0.454603
USP28	ubiquitin specific peptidase 28	0	5	0.454603
AMOTL2	angiomotin like 2	0	7	0.454129
CELSR2	cadherin, EGF LAG seven-pass G-type receptor 2	0	7	0.454129
SS18L1	synovial sarcoma translocation gene on chromosome 18-like 1	0	9	0.453868
WASL	Wiskott-Aldrich syndrome-like	7	9	0.453868
PCDHA6	protocadherin alpha 6	0	11	0.453701
MBD6	methyl-CpG binding domain protein 6	0	8	0.452951
SLC7A11	solute carrier family 7 (anionic amino acid transporter light chain, xc- system), member 11	0	14	0.452951
WDR43	WD repeat domain 43	0	6	0.452951
ANXA5	annexin A5	0	2	0.45295
AP3M1	adaptor-related protein complex 3, mu 1 subunit	1	10	0.45295
BAG2	BCL2-associated athanogene 2	1	2	0.45295
CHIC2	cysteine-rich hydrophobic domain 2	0	2	0.45295
E2F7	E2F transcription factor 7	0	10	0.45295
FCRL6	Fc receptor-like 6	0	2	0.45295
JARID1B		0	2	0.45295
LHX2	LIM homeobox 2	0	2	0.45295
MYF5	myogenic factor 5	0	2	0.45295
MYOD1	myogenic differentiation 1	0	2	0.45295
PPP1CA	protein phosphatase 1, catalytic subunit, alpha isozyme	6	2	0.45295
ST8SIA4	ST8 alpha-N-acetyl-neuraminide alpha-2,8-sialyltransferase 4	0	12	0.45295
ADRBK1	adrenergic, beta, receptor kinase 1	2	4	0.452949
DNAJC14	DnaJ (Hsp40) homolog, subfamily C, member 14	0	4	0.452949
FCRLA	Fc receptor-like A	0	4	0.452949
MMP14	matrix metallopeptidase 14 (membrane-inserted)	1	4	0.452949
NNT	nicotinamide nucleotide transhydrogenase	2	4	0.452949
SLC29A2	solute carrier family 29 (equilibrative nucleoside transporter), member 2	0	4	0.452949
TSC1	tuberous sclerosis 1	2	13	0.452318
MAP2	microtubule-associated protein 2	0	11	0.452203
FGF7	fibroblast growth factor 7	4	9	0.452037
TAPT1	transmembrane anterior posterior transformation 1	0	7	0.451777
TMEM64	transmembrane protein 64	0	7	0.451777
ARL10	ADP-ribosylation factor-like 10	0	5	0.45131
CAPN7	calpain 7	0	5	0.45131
DAG1	dystroglycan 1 (dystrophin-associated glycoprotein 1)	5	10	0.45131
MMP2	matrix metallopeptidase 2 (gelatinase A, 72kDa gelatinase, 72kDa type IV collagenase)	4	5	0.45131
RALGDS	ral guanine nucleotide dissociation stimulator	3	5	0.45131
CD164	CD164 molecule, sialomucin	1	8	0.4509
FBXO45	F-box protein 45	0	8	0.4509
PCDHA4	protocadherin alpha 4	0	11	0.450716
EML1	echinoderm microtubule associated protein like 1	0	6	0.450222
LIF	leukemia inhibitory factor	2	9	0.450222
SENP2	SUMO1/sentrin/SMT3 specific peptidase 2	2	6	0.450222
STRN3	striatin, calmodulin binding protein 3	0	6	0.450222
RAPH1	Ras association (RalGDS/AF-6) and pleckstrin homology domains 1	0	13	0.449805
PCDHA2	protocadherin alpha 2	0	10	0.44968
ZFAND5	zinc finger, AN1-type domain 5	0	7	0.449449
DARS	aspartyl-tRNA synthetase	1	4	0.44887
GPR137B	G protein-coupled receptor 137B	0	4	0.44887
LOXL3	lysyl oxidase-like 3	0	4	0.44887
SMURF2	SMAD specific E3 ubiquitin protein ligase 2	3	4	0.44887
USP15	ubiquitin specific peptidase 15	0	8	0.44887
C17ORF39		0	9	0.448421
AP1G1	adaptor-related protein complex 1, gamma 1 subunit	1	14	0.448293
ETV1	ets variant 1	0	10	0.448063
SP1	Sp1 transcription factor	2	15	0.448063
IGSF1	immunoglobulin superfamily, member 1	0	5	0.448062
PAFAH2	platelet-activating factor acetylhydrolase 2, 40kDa	2	5	0.448062
SOCS3	suppressor of cytokine signaling 3	6	5	0.448062
ANK2	ankyrin 2, neuronal	0	11	0.44777
LIN7C	lin-7 homolog C (C. elegans)	0	11	0.44777
DAPK1	death-associated protein kinase 1	2	6	0.447527
ELOVL4	ELOVL fatty acid elongase 4	0	6	0.447527
HBEGF	heparin-binding EGF-like growth factor	3	6	0.447527
LARGE	like-glycosyltransferase	0	6	0.447527
PPP1R12A	protein phosphatase 1, regulatory subunit 12A	4	6	0.447527
EPB41L4B	erythrocyte membrane protein band 4.1 like 4B	0	12	0.447526
GATAD2B	GATA zinc finger domain containing 2B	0	13	0.44732
APC	adenomatous polyposis coli	6	7	0.447143
DOLPP1	dolichyldiphosphatase 1	1	7	0.447143
EML4	echinoderm microtubule associated protein like 4	0	7	0.447143
GALNT2	UDP-N-acetyl-alpha-D-galactosamine:polypeptide N-acetylgalactosaminyltransferase 2 (GalNAc-T2)	2	7	0.447143
SOX11	SRY (sex determining region Y)-box 11	0	16	0.446857
NCALD	neurocalcin delta	0	8	0.446856
FRS2	fibroblast growth factor receptor substrate 2	1	14	0.446
BAMBI	BMP and activin membrane-bound inhibitor	0	4	0.444863
ZNF800	zinc finger protein 800	0	7	0.444863
ARHGAP12	Rho GTPase activating protein 12	0	8	0.444862
C1ORF26		0	3	0.444862
COL4A5	collagen, type IV, alpha 5	0	5	0.444862
DDX50	DEAD (Asp-Glu-Ala-Asp) box polypeptide 50	0	1	0.444862
ELOVL5	ELOVL fatty acid elongase 5	1	6	0.444862
IPO7	importin 7	0	1	0.444862
KIF27	kinesin family member 27	0	1	0.444862
KRT33B	keratin 33B	0	2	0.444862
NKAIN2	Na+/K+ transporting ATPase interacting 2	0	9	0.444862
SBK1	SH3 domain binding kinase 1	0	8	0.444862
SCG5	secretogranin V (7B2 protein)	0	2	0.444862
SPTY2D1	SPT2, Suppressor of Ty, domain containing 1 (S. cerevisiae)	0	11	0.444862
TARS	threonyl-tRNA synthetase	1	1	0.444862
TDRD7	tudor domain containing 7	0	1	0.444862
TRPC3	transient receptor potential cation channel, subfamily C, member 3	0	3	0.444862
ZNF839	zinc finger protein 839	0	1	0.444862
PTPN3	protein tyrosine phosphatase, non-receptor type 3	0	10	0.443279
G3BP2	GTPase activating protein (SH3 domain) binding protein 2	0	9	0.443104
SRF	serum response factor (c-fos serum response element-binding transcription factor)	1	9	0.443104
TIAM1	T-cell lymphoma invasion and metastasis 1	2	9	0.443104
GRHL1	grainyhead-like 1 (Drosophila)	0	7	0.442604
NLGN1	neuroligin 1	1	6	0.44223
NTN4	netrin 4	1	6	0.44223
PDGFRB	platelet-derived growth factor receptor, beta polypeptide	10	6	0.44223
PTPN2	protein tyrosine phosphatase, non-receptor type 2	0	6	0.44223
RAB8A	RAB8A, member RAS oncogene family	1	6	0.44223
ACAP2	ArfGAP with coiled-coil, ankyrin repeat and PH domains 2	1	11	0.441992
USP47	ubiquitin specific peptidase 47	0	11	0.441992
RHOB	ras homolog family member B	0	5	0.441706
ASH1L	ash1 (absent, small, or homeotic)-like (Drosophila)	2	9	0.44136
ZADH2	zinc binding alcohol dehydrogenase domain containing 2	0	9	0.44136
PITPNC1	phosphatidylinositol transfer protein, cytoplasmic 1	0	4	0.440925
S100PBP	S100P binding protein	0	12	0.440925
SFRS10		1	4	0.440925
SLC2A4	solute carrier family 2 (facilitated glucose transporter), member 4	3	4	0.440925
ARHGEF6	Rac/Cdc42 guanine nucleotide exchange factor (GEF) 6	2	7	0.440369
C10ORF26		0	7	0.440369
GALC	galactosylceramidase	3	7	0.440369
LDLR	low density lipoprotein receptor	3	7	0.440369
MAP3K7IP2		5	10	0.440146
PALLD	palladin, cytoskeletal associated protein	0	10	0.440146
CDH22	cadherin 22, type 2	0	3	0.43963
FADD	Fas (TNFRSF6)-associated via death domain	6	3	0.43963
IL25	interleukin 25	1	3	0.43963
DCBLD2	discoidin, CUB and LCCL domain containing 2	0	12	0.439629
BACH1	BTB and CNC homology 1, basic leucine zipper transcription factor 1	0	9	0.439628
FLRT3	fibronectin leucine rich transmembrane protein 3	0	6	0.439628
KIAA1274		0	6	0.439628
DIP2B	DIP2 disco-interacting protein 2 homolog B (Drosophila)	0	11	0.439158
DHX40	DEAH (Asp-Glu-Ala-His) box polypeptide 40	0	5	0.438596
FOXJ2	forkhead box J2	0	10	0.438596
ORMDL3	ORM1-like 3 (S. cerevisiae)	0	5	0.438596
RSPO3	R-spondin 3	0	5	0.438596
SCARA5	scavenger receptor class A, member 5 (putative)	0	5	0.438596
TNRC4		0	5	0.438596
USP24	ubiquitin specific peptidase 24	0	10	0.438596
DOCK3	dedicator of cytokinesis 3	0	9	0.437912
FIGN	fidgetin	0	13	0.437648
ADM	adrenomedullin	1	4	0.437059
C2CD2L	C2CD2-like	0	4	0.437059
HMGA1	high mobility group AT-hook 1	0	4	0.437059
TRIM67	tripartite motif containing 67	0	4	0.437059
CCDC46		0	2	0.437057
CPNE8	copine VIII	0	8	0.437057
SMS	spermine synthase	5	2	0.437057
TNRC6B	trinucleotide repeat containing 6B	0	19	0.436655
PELI1	pellino E3 ubiquitin protein ligase 1	0	7	0.435965
BCL11A	B-cell CLL/lymphoma 11A (zinc finger protein)	0	12	0.435783
NAP1L5	nucleosome assembly protein 1-like 5	0	5	0.43553
STAG3L4	stromal antigen 3-like 4 (pseudogene)	0	5	0.43553
DTNA	dystrobrevin, alpha	0	13	0.435295
RIMBP2	RIMS binding protein 2	0	9	0.434517
DPP3	dipeptidyl-peptidase 3	0	3	0.434516
KCTD17	potassium channel tetramerization domain containing 17	0	3	0.434516
IGF1R	insulin-like growth factor 1 receptor	10	14	0.433796
ADAM12	ADAM metallopeptidase domain 12	0	7	0.433795
ALS2CR8		0	4	0.433257
CTSC	cathepsin C	1	4	0.433257
RGAG1	retrotransposon gag domain containing 1	0	4	0.433257
ZNF512B	zinc finger protein 512B	0	8	0.433257
ADRA2A	adrenoceptor alpha 2A	1	5	0.432505
FZD3	frizzled family receptor 3	4	5	0.432505
RUNDC1	RUN domain containing 1	0	5	0.432505
RNF8	ring finger protein 8, E3 ubiquitin protein ligase	0	11	0.432232
PI4K2B	phosphatidylinositol 4-kinase type 2 beta	3	6	0.432005
FAM110B	family with sequence similarity 110, member B	0	7	0.431648
CACNB2	calcium channel, voltage-dependent, beta 2 subunit	5	8	0.431382
ZBTB4	zinc finger and BTB domain containing 4	0	9	0.431174
CTTNBP2NL	CTTNBP2 N-terminal like	0	10	0.431009
SGK269		0	12	0.43076
PCDH19	protocadherin 19	0	13	0.430665
ONECUT2	one cut homeobox 2	0	18	0.430346
ANTXR2	anthrax toxin receptor 2	0	4	0.429523
CTCFL	CCCTC-binding factor (zinc finger protein)-like	0	5	0.429523
PEX3	peroxisomal biogenesis factor 3	1	4	0.429523
SFRS11		0	5	0.429523
SLC35D3	solute carrier family 35, member D3	0	4	0.429523
TADA2B	transcriptional adaptor 2B	0	6	0.429523
THOC2	THO complex 2	2	3	0.429523
TNFSF11	tumor necrosis factor (ligand) superfamily, member 11	1	5	0.429523
ZBTB40	zinc finger and BTB domain containing 40	0	7	0.429523
ZNF711	zinc finger protein 711	0	6	0.429523
ARF5	ADP-ribosylation factor 5	0	2	0.429522
AVEN	apoptosis, caspase activation inhibitor	0	2	0.429522
C14ORF73		0	1	0.429522
CSNK2A2	casein kinase 2, alpha prime polypeptide	3	2	0.429522
DHX15	DEAH (Asp-Glu-Ala-His) box helicase 15	1	2	0.429522
DLK1	delta-like 1 homolog (Drosophila)	0	1	0.429522
EIF2C4		0	10	0.429522
GPR162	G protein-coupled receptor 162	0	1	0.429522
GTSF1	gametocyte specific factor 1	0	1	0.429522
H3F3A	H3 histone, family 3A	1	1	0.429522
HTATSF1	HIV-1 Tat specific factor 1	0	1	0.429522
MAPK14	mitogen-activated protein kinase 14	18	8	0.429522
MTX2	metaxin 2	0	1	0.429522
PABPC4	poly(A) binding protein, cytoplasmic 4 (inducible form)	0	1	0.429522
PAK3	p21 protein (Cdc42/Rac)-activated kinase 3	6	2	0.429522
PCTK3		0	2	0.429522
THOC7	THO complex 7 homolog (Drosophila)	1	1	0.429522
FZD4	frizzled family receptor 4	4	15	0.428537
SERTAD2	SERTA domain containing 2	0	13	0.428386
E2F2	E2F transcription factor 2	10	10	0.428046
CYP26B1	cytochrome P450, family 26, subfamily B, polypeptide 1	1	8	0.427679
GOLT1B	golgi transport 1B	0	8	0.427679
MCF2L	MCF.2 cell line derived transforming sequence-like	0	8	0.427679
GRIN3A	glutamate receptor, ionotropic, N-methyl-D-aspartate 3A	1	12	0.427067
GNPDA1	glucosamine-6-phosphate deaminase 1	2	5	0.42658
SPAG9	sperm associated antigen 9	0	5	0.42658
NF1	neurofibromin 1	1	8	0.425852
CCDC6	coiled-coil domain containing 6	2	12	0.425851
LINGO1	leucine rich repeat and Ig domain containing 1	0	4	0.42585
ATP2B2	ATPase, Ca++ transporting, plasma membrane 2	3	11	0.42552
EPHA7	EPH receptor A7	1	7	0.425332
POGZ	pogo transposable element with ZNF domain	0	7	0.425332
MED13	mediator complex subunit 13	0	10	0.425124
FAM46A	family with sequence similarity 46, member A	0	13	0.425012
RDH10	retinol dehydrogenase 10 (all-trans)	2	6	0.424642
RNF144B	ring finger protein 144B	0	9	0.424641
HOXC4	homeobox C4	0	3	0.42464
IHH	indian hedgehog	1	3	0.42464
TCTN3	tectonic family member 3	0	3	0.42464
AFF2	AF4/FMR2 family, member 2	0	17	0.424357
ADAMTS6	ADAM metallopeptidase with thrombospondin type 1 motif, 6	0	11	0.424203
MKRN1	makorin ring finger protein 1	0	8	0.424039
GM2A	GM2 ganglioside activator	1	5	0.423679
RCBTB1	regulator of chromosome condensation (RCC1) and BTB (POZ) domain containing protein 1	0	5	0.423679
SETD3	SET domain containing 3	0	5	0.423679
WAC	WW domain containing adaptor with coiled-coil	0	5	0.423679
PCGF3	polycomb group ring finger 3	0	12	0.423438
ARID3B	AT rich interactive domain 3B (BRIGHT-like)	0	7	0.423267
DGKI	diacylglycerol kinase, iota	4	7	0.423267
IGF1	insulin-like growth factor 1 (somatomedin C)	13	13	0.422793
B4GALT2	UDP-Gal:betaGlcNAc beta 1,4- galactosyltransferase, polypeptide 2	5	4	0.422243
MYEF2	myelin expression factor 2	0	8	0.422243
RPP14	ribonuclease P/MRP 14kDa subunit	1	4	0.422243
RPS6KA4	ribosomal protein S6 kinase, 90kDa, polypeptide 4	2	4	0.422243
SLC6A9	solute carrier family 6 (neurotransmitter transporter, glycine), member 9	0	4	0.422243
CACNA1C	calcium channel, voltage-dependent, L type, alpha 1C subunit	11	6	0.422242
CCDC92	coiled-coil domain containing 92	0	2	0.422242
CNOT6L	CCR4-NOT transcription complex, subunit 6-like	1	14	0.422242
DULLARD		0	2	0.422242
GHR	growth hormone receptor	3	6	0.422242
HBXIP		0	2	0.422242
NFE2L2	nuclear factor, erythroid 2-like 2	1	2	0.422242
PNOC	prepronociceptin	0	2	0.422242
SLC25A15	solute carrier family 25 (mitochondrial carrier; ornithine transporter) member 15	1	2	0.422242
SETD7	SET domain containing (lysine methyltransferase) 7	1	13	0.421692
DIXDC1	DIX domain containing 1	0	11	0.421593
TBL1X	transducin (beta)-like 1X-linked	1	9	0.421448
TLE4	transducin-like enhancer of split 4 (E(sp1) homolog, Drosophila)	0	9	0.421448
TTC9	tetratricopeptide repeat domain 9	0	9	0.421448
CLDN11	claudin 11	4	5	0.420815
HIVEP1	human immunodeficiency virus type I enhancer binding protein 1	0	5	0.420815
SLC31A2	solute carrier family 31 (copper transporter), member 2	0	5	0.420815
MSL2	male-specific lethal 2 homolog (Drosophila)	0	8	0.42046
TRHDE	thyrotropin-releasing hormone degrading enzyme	0	8	0.42046
AASDHPPT	aminoadipate-semialdehyde dehydrogenase-phosphopantetheinyl transferase	0	6	0.41987
CAMSAP1L1		0	9	0.41987
CCR7	chemokine (C-C motif) receptor 7	2	3	0.41987
ETF1	eukaryotic translation termination factor 1	0	9	0.41987
ID2	inhibitor of DNA binding 2, dominant negative helix-loop-helix protein	1	3	0.41987
PKD2	polycystic kidney disease 2 (autosomal dominant)	0	6	0.41987
NEDD4	neural precursor cell expressed, developmentally down-regulated 4, E3 ubiquitin protein ligase	2	7	0.419197
C9ORF25		0	8	0.418694
CDV3	CDV3 homolog (mouse)	0	8	0.418694
TBC1D8B	TBC1 domain family, member 8B (with GRAM domain)	0	8	0.418694
DUSP9	dual specificity phosphatase 9	1	4	0.418693
GLI2	GLI family zinc finger 2	3	4	0.418693
JAG2	jagged 2	1	4	0.418693
LIPH	lipase, member H	0	4	0.418693
NBL1	neuroblastoma 1, DAN family BMP antagonist	0	4	0.418693
IL1RAP	interleukin 1 receptor accessory protein	2	13	0.418424
DACT1	dishevelled-binding antagonist of beta-catenin 1	0	5	0.417992
GMFB	glia maturation factor, beta	0	10	0.417992
HOXB3	homeobox B3	0	5	0.417992
KCNC2	potassium voltage-gated channel, Shaw-related subfamily, member 2	0	5	0.417992
TRIM13	tripartite motif containing 13	0	10	0.417992
CACNG4	calcium channel, voltage-dependent, gamma subunit 4	5	6	0.417524
GRIA2	glutamate receptor, ionotropic, AMPA 2	4	7	0.417192
SFRS2		1	7	0.417192
CUGBP2		0	15	0.417058
EPN2	epsin 2	1	8	0.416942
AMELY	amelogenin, Y-linked	0	1	0.415205
C11ORF75		0	2	0.415205
C6ORF218		0	2	0.415205
CAPN6	calpain 6	0	6	0.415205
DHX29	DEAH (Asp-Glu-Ala-His) box polypeptide 29	0	1	0.415205
DHX9	DEAH (Asp-Glu-Ala-His) box helicase 9	0	1	0.415205
DVL1	dishevelled segment polarity protein 1	5	1	0.415205
EPHA1	EPH receptor A1	1	1	0.415205
GPR172B		0	1	0.415205
LRP5L	low density lipoprotein receptor-related protein 5-like	0	1	0.415205
MFAP2	microfibrillar-associated protein 2	0	1	0.415205
MRLC2		4	1	0.415205
NAPEPLD	N-acyl phosphatidylethanolamine phospholipase D	0	8	0.415205
PLUNC		0	1	0.415205
PPFIA2	protein tyrosine phosphatase, receptor type, f polypeptide (PTPRF), interacting protein (liprin), alpha 2	0	1	0.415205
PPP1R14D	protein phosphatase 1, regulatory (inhibitor) subunit 14D	0	1	0.415205
PVRL2	poliovirus receptor-related 2 (herpesvirus entry mediator B)	2	4	0.415205
RBBP4	retinoblastoma binding protein 4	0	2	0.415205
SERPINH1	serpin peptidase inhibitor, clade H (heat shock protein 47), member 1, (collagen binding protein 1)	0	2	0.415205
SLC35D2	solute carrier family 35 (UDP-GlcNAc/UDP-glucose transporter), member D2	0	4	0.415205
SNCG	synuclein, gamma (breast cancer-specific protein 1)	0	1	0.415205
SOCS2	suppressor of cytokine signaling 2	3	4	0.415205
SORBS2	sorbin and SH3 domain containing 2	0	8	0.415205
SPIN2B	spindlin family, member 2B	0	1	0.415205
TUBB2A	tubulin, beta 2A class IIa	3	1	0.415205
ZNF777	zinc finger protein 777	0	1	0.415205
FAS	Fas cell surface death receptor	12	7	0.415204
GDF6	growth differentiation factor 6	2	7	0.415204
RP5-1022P6.2		0	5	0.415204
SLC30A4	solute carrier family 30 (zinc transporter), member 4	0	7	0.415204
ZMYND8	zinc finger, MYND-type containing 8	0	5	0.415204
CA2	carbonic anhydrase II	5	3	0.415203
COPS2	COP9 signalosome subunit 2	0	3	0.415203
PDIA6	protein disulfide isomerase family A, member 6	1	3	0.415203
RPUSD3	RNA pseudouridylate synthase domain containing 3	0	3	0.415203
STRADB	STE20-related kinase adaptor beta	0	3	0.415203
WIF1	WNT inhibitory factor 1	1	3	0.415203
LIN28		0	11	0.41395
NCAM1	neural cell adhesion molecule 1	2	11	0.41395
MMP24	matrix metallopeptidase 24 (membrane-inserted)	0	8	0.413481
FBXL17	F-box and leucine-rich repeat protein 17	0	7	0.413237
NAT12		0	7	0.413237
PCNP	PEST proteolytic signal containing nuclear protein	0	7	0.413237
ZIC5	Zic family member 5	0	7	0.413237
EFNB1	ephrin-B1	1	6	0.41291
ZCCHC3	zinc finger, CCHC domain containing 3	0	6	0.41291
CCDC97	coiled-coil domain containing 97	0	5	0.412455
MAT2B	methionine adenosyltransferase II, beta	3	5	0.412455
RPS6KA1	ribosomal protein S6 kinase, 90kDa, polypeptide 1	6	5	0.412455
MATR3	matrin 3	0	8	0.411773
NCOA1	nuclear receptor coactivator 1	0	8	0.411773
ZBTB33	zinc finger and BTB domain containing 33	0	8	0.411773
COL11A2	collagen, type XI, alpha 2	4	4	0.411772
OSM	oncostatin M	2	4	0.411772
KRAS	Kirsten rat sarcoma viral oncogene homolog	35	11	0.411464
MXD1	MAX dimerization protein 1	0	11	0.411464
ADD3	adducin 3 (gamma)	0	7	0.411287
CANT1	calcium activated nucleotidase 1	2	6	0.410642
CAPZB	capping protein (actin filament) muscle Z-line, beta	0	3	0.410642
LAMC1	laminin, gamma 1 (formerly LAMB2)	7	9	0.410642
PLK2	polo-like kinase 2	0	3	0.410642
SLC16A1	solute carrier family 16 (monocarboxylate transporter), member 1	0	6	0.410642
YWHAQ	tyrosine 3-monooxygenase/tryptophan 5-monooxygenase activation protein, theta polypeptide	4	6	0.410642
HIC2	hypermethylated in cancer 2	0	11	0.410232
WNK3	WNK lysine deficient protein kinase 3	0	8	0.410078
DDX46	DEAD (Asp-Glu-Ala-Asp) box polypeptide 46	1	5	0.409741
SEMA4G	sema domain, immunoglobulin domain (Ig), transmembrane domain (TM) and short cytoplasmic domain, (semaphorin) 4G	1	10	0.409741
FAM60A	family with sequence similarity 60, member A	0	7	0.409357
SRGAP3	SLIT-ROBO Rho GTPase activating protein 3	1	14	0.409357
ZC3H7B	zinc finger CCCH-type containing 7B	0	7	0.409357
PCYT1B	phosphate cytidylyltransferase 1, choline, beta	2	9	0.409144
ENC1	ectodermal-neural cortex 1 (with BTB domain)	0	6	0.408399
TMEM168	transmembrane protein 168	0	6	0.408399
DOT1L	DOT1-like histone H3K79 methyltransferase	1	2	0.408398
ENTPD4	ectonucleoside triphosphate diphosphohydrolase 4	3	2	0.408398
HAPLN1	hyaluronan and proteoglycan link protein 1	0	2	0.408398
MEF2D	myocyte enhancer factor 2D	0	12	0.408398
STMN1	stathmin 1	1	4	0.408398
TCL1A	T-cell leukemia/lymphoma 1A	0	2	0.408398
ZMYM4	zinc finger, MYM-type 4	0	7	0.407444
ARPC5	actin related protein 2/3 complex, subunit 5, 16kDa	5	5	0.407063
SNX10	sorting nexin 10	0	5	0.407063
TOX	thymocyte selection-associated high mobility group box	0	8	0.406732
DLGAP2	discs, large (Drosophila) homolog-associated protein 2	0	14	0.406494
C10ORF137	chromosome 10 open reading frame 137	0	3	0.40618
C18ORF34		0	3	0.40618
DCN	decorin	1	3	0.40618
NME6	NME/NM23 nucleoside diphosphate kinase 6	3	3	0.40618
ZCCHC17	zinc finger, CCHC domain containing 17	0	3	0.40618
ZNF410	zinc finger protein 410	0	3	0.40618
PCDHA11	protocadherin alpha 11	0	9	0.406179
PCDHA12	protocadherin alpha 12	0	9	0.406179
ARPP-19		0	6	0.406178
INO80	INO80 complex subunit	0	6	0.406178
STAG2	stromal antigen 2	1	6	0.406178
ANKRD50	ankyrin repeat domain 50	0	7	0.405549
TAF9B	TAF9B RNA polymerase II, TATA box binding protein (TBP)-associated factor, 31kDa	1	7	0.405549
TNKS2	tankyrase, TRF1-interacting ankyrin-related ADP-ribose polymerase 2	0	7	0.405549
KLF4	Kruppel-like factor 4 (gut)	0	4	0.405079
C16ORF72	chromosome 16 open reading frame 72	0	9	0.404712
TP53	tumor protein p53	22	5	0.404421
TMEM2	transmembrane protein 2	0	6	0.403984
LPHN3	latrophilin 3	0	7	0.403672
SLC16A2	solute carrier family 16, member 2 (thyroid hormone transporter)	0	8	0.403438
TARDBP	TAR DNA binding protein	0	9	0.403257
SGCD	sarcoglycan, delta (35kDa dystrophin-associated glycoprotein)	4	13	0.402811
C12ORF34		0	4	0.401811
CDC7	cell division cycle 7	1	3	0.401811
COPS3	COP9 signalosome subunit 3	0	1	0.401811
FAM160A2	family with sequence similarity 160, member A2	0	1	0.401811
FUBP1	far upstream element (FUSE) binding protein 1	0	3	0.401811
GRIA1	glutamate receptor, ionotropic, AMPA 1	4	2	0.401811
LPPR4	lipid phosphate phosphatase-related protein type 4	0	8	0.401811
NUDC	nudC nuclear distribution protein	0	1	0.401811
PSMD11	proteasome (prosome, macropain) 26S subunit, non-ATPase, 11	1	1	0.401811
SGCB	sarcoglycan, beta (43kDa dystrophin-associated glycoprotein)	4	8	0.401811
SIRT4	sirtuin 4	0	1	0.401811
SNX6	sorting nexin 6	0	7	0.401811
TRIM8	tripartite motif containing 8	0	4	0.401811
ZNF706	zinc finger protein 706	0	6	0.401811
CCND2	cyclin D2	5	12	0.400734
SEMA6D	sema domain, transmembrane domain (TM), and cytoplasmic domain, (semaphorin) 6D	1	12	0.400734
MCL1	myeloid cell leukemia sequence 1 (BCL2-related)	0	9	0.400376
DMTF1	cyclin D binding myb-like transcription factor 1	0	7	0.399968
E2F6	E2F transcription factor 6	0	7	0.399968
LIMD2	LIM domain containing 2	0	7	0.399968
TCF7	transcription factor 7 (T-cell specific, HMG-box)	11	7	0.399968
TANC2	tetratricopeptide repeat, ankyrin repeat and coiled-coil containing 2	0	13	0.399826
TRIB1	tribbles pseudokinase 1	0	6	0.399663
PRRT2	proline-rich transmembrane protein 2	0	5	0.399236
UBE2W	ubiquitin-conjugating enzyme E2W (putative)	1	10	0.399235
POLQ	polymerase (DNA directed), theta	0	4	0.398597
SNIP		0	4	0.398597
TOP1	topoisomerase (DNA) I	0	4	0.398597
DMD	dystrophin	4	11	0.398307
SOCS4	suppressor of cytokine signaling 4	3	11	0.398307
ACTR10	actin-related protein 10 homolog (S. cerevisiae)	0	3	0.397537
CD3E	CD3e molecule, epsilon (CD3-TCR complex)	4	3	0.397537
PXT1	peroxisomal, testis specific 1	0	3	0.397537
ADO	2-aminoethanethiol (cysteamine) dioxygenase	2	6	0.397536
NXT2	nuclear transport factor 2-like export factor 2	1	6	0.397536
PPP2R5C	protein phosphatase 2, regulatory subunit B', gamma	2	9	0.397536
TET3	tet methylcytosine dioxygenase 3	0	6	0.397536
IQSEC1	IQ motif and Sec7 domain 1	1	5	0.396692
SH3GL2	SH3-domain GRB2-like 2	1	5	0.396692
SLC12A6	solute carrier family 12 (potassium/chloride transporter), member 6	0	10	0.396692
TP53INP2	tumor protein p53 inducible nuclear protein 2	0	10	0.396692
WIPF2	WAS/WASL interacting protein family, member 2	0	10	0.396692
SP8	Sp8 transcription factor	0	7	0.396332
WDR7	WD repeat domain 7	0	7	0.396332
NTRK2	neurotrophic tyrosine kinase, receptor, type 2	2	17	0.395803
C6ORF204		0	2	0.395433
ERBB2IP	erbb2 interacting protein	1	8	0.395433
FAM109A	family with sequence similarity 109, member A	0	4	0.395433
FRS3	fibroblast growth factor receptor substrate 3	0	2	0.395433
JRKL	jerky homolog-like (mouse)	0	4	0.395433
NIN	ninein (GSK3B interacting protein)	0	10	0.395433
RABEP1	rabaptin, RAB GTPase binding effector protein 1	1	4	0.395433
[truncated: 4,894 more rows]
